# Supplementary material for: Single-Cell and Transcriptome-Based Immune Cell-Related Prognostic Model in Clear Cell Renal Cell Carcinoma
Source: Hindawi journal article supplement (doi:10.1155/2023/5355269), 2023-03-07
Supplement: f1 [file 5355269.f1.zip]

x  
1 PAX2  
2 NFIL3  
3 NFKBIZ  
4 IRF2  
5 NKX2.1  
6 LRRFIP1  
7 DACH1  
8 TEAD4  
9 HIPK2  
10 HEXIM1  
11 DNMT3A  
12 FOXI1  
13 CD14  
14 CD40LG  
15 CDH1  
16 COL1A1  
17 COL4A3  
18 CXCL12  
19 IL12A  
20 INS  
21 MMP2  
22 SHH  
23 DEFB103B  
24 HSP90B1  
25 NRG1  
26 COL5A2  
27 RSPO3  
28 GPR182  
29 CCR3  
30 ITGA6  
31 CD151  
32 HDAC1  
33 EOMES  
34 CDX1  
35 HOXA9  
36 ZNF24  
37 E2F5  
38 TBX5  
39 KLF15  
40 APP  
41 AREG  
42 FGF1  
43 L1CAM  
44 MST1  
45 SERPINC1  
46 VCAM1  
47 ZP3  
48 KNG1  
49 COL3A1  
50 VLDLR  
51 DDR1  
52 CSF1R  
53 EPHA3
