# Supplementary material for: Single-Cell and Transcriptome-Based Immune Cell-Related Prognostic Model in Clear Cell Renal Cell Carcinoma
Source: Hindawi journal article supplement (doi:10.1155/2023/5355269), 2023-03-07
Supplement: f1 [file 5355269.f1.zip]

| TF        | Ligand.Symbol | Receptor.Symbol | Pair.Name     |
|-----------|---------------|-----------------|---------------|
| 1 STAT3   | A2M           | LRP1            | A2M_LRP1      |
| 2 TFCP2   | A2M           | LRP1            | A2M_LRP1      |
| 3 NFkB1   | A2M           | LRP1            | A2M_LRP1      |
| 4 SP1     | ADAM10        | AXL             | ADAM10_AXL    |
| 5 PAX2    | ADAM10        | AXL             | ADAM10_AXL    |
| 6 SKIL    | ADAM12        | SDC4            | ADAM12_SDC4   |
| 7 SKIL    | ADAM12        | ITGB1           | ADAM12_ITGB1  |
| 8 SP1     | ADAM17        | ITGB1           | ADAM17_ITGB1  |
| 9 CEBPB   | ADM           | RAMP2           | ADM_RAMP2     |
| 10 CEBPB  | ADM           | CALCR           | ADM_CALCR     |
| 11 CEBPB  | ADM           | GPR182          | ADM_GPR182    |
| 12 CEBPB  | ADM           | MRGPRX2         | ADM_MRGPRX2   |
| 13 CEBPB  | ADM           | CALCRL          | ADM_CALCRL    |
| 14 TFAP2A | ADM           | RAMP2           | ADM_RAMP2     |
| 15 TFAP2A | ADM           | CALCR           | ADM_CALCR     |
| 16 TFAP2A | ADM           | GPR182          | ADM_GPR182    |
| 17 TFAP2A | ADM           | MRGPRX2         | ADM_MRGPRX2   |
| 18 TFAP2A | ADM           | CALCRL          | ADM_CALCRL    |
| 19 GTF3A  | ADM           | RAMP2           | ADM_RAMP2     |
| 20 GTF3A  | ADM           | CALCR           | ADM_CALCR     |
| 21 GTF3A  | ADM           | GPR182          | ADM_GPR182    |
| 22 GTF3A  | ADM           | MRGPRX2         | ADM_MRGPRX2   |
| 23 GTF3A  | ADM           | CALCRL          | ADM_CALCRL    |
| 24 NFkB1  | ALOX5AP       | ALOX5           | ALOX5AP_ALOX5 |
| 25 HIF1A  | ALOX5AP       | ALOX5           | ALOX5AP_ALOX5 |
| 26 RELA   | ALOX5AP       | ALOX5           | ALOX5AP_ALOX5 |
| 27 SF1    | AMH           | EGFR            | AMH_EGFR      |
| 28 NFkB1  | AMH           | EGFR            | AMH_EGFR      |
| 29 GATA4  | AMH           | EGFR            | AMH_EGFR      |
| 30 NR5A1  | AMH           | EGFR            | AMH_EGFR      |
| 31 RELA   | AMH           | EGFR            | AMH_EGFR      |
| 32 WT1    | AMH           | EGFR            | AMH_EGFR      |
| 33 ESR1   | AMH           | EGFR            | AMH_EGFR      |
| 34 SOX9   | AMH           | EGFR            | AMH_EGFR      |
| 35 VDR    | AMH           | EGFR            | AMH_EGFR      |
| 36 NR0B1  | AMH           | EGFR            | AMH_EGFR      |
| 37 ING4   | ANGPT1        | ITGB1           | ANGPT1_ITGB1  |
| 38 SMAD3  | ANGPTL4       | TIE1            | ANGPTL4_TIE1  |
| 39 PPARD  | ANGPTL4       | TIE1            | ANGPTL4_TIE1  |
| 40 PPARG  | ANGPTL4       | TIE1            | ANGPTL4_TIE1  |
| 41 PPARA  | ANGPTL4       | TIE1            | ANGPTL4_TIE1  |
| 42 NR2F1  | APOB          | ITGB2           | APOB_ITGB2    |
| 43 NR2F1  | APOB          | OLR1            | APOB_OLR1     |
| 44 NR2F1  | APOB          | ITGAM           | APOB_ITGAM    |
| 45 NR2F6  | APOB          | ITGB2           | APOB_ITGB2    |
| 46 NR2F6  | APOB          | OLR1            | APOB_OLR1     |
| 47 NR2F6  | APOB          | ITGAM           | APOB_ITGAM    |
| 48 FOXA1  | APOB          | ITGB2           | APOB_ITGB2    |
| 49 FOXA1  | APOB          | OLR1            | APOB_OLR1     |
| 50 FOXA1  | APOB          | ITGAM           | APOB_ITGAM    |
| 51 PPARG  | APOB          | ITGB2           | APOB_ITGB2    |
| 52 PPARG  | APOB          | OLR1            | APOB_OLR1     |
| 53 PPARG  | APOB          | ITGAM           | APOB_ITGAM    |
| 54 PPARA  | APOB          | ITGB2           | APOB_ITGB2    |
| 55 PPARA  | APOB          | OLR1            | APOB_OLR1     |
| 56 PPARA  | APOB          | ITGAM           | APOB_ITGAM    |
| 57 HNF4A  | APOB          | ITGB2           | APOB_ITGB2    |

|     |          |       |          |              |
|-----|----------|-------|----------|--------------|
| 58  | HNF4A    | APOB  | OLR1     | APOB_OLR1    |
| 59  | HNF4A    | APOB  | ITGAM    | APOB_ITGAM   |
| 60  | ATF2     | APOC3 | TLR2     | APOC3_TLR2   |
| 61  | NR2F6    | APOC3 | TLR2     | APOC3_TLR2   |
| 62  | NR2F1    | APOC3 | TLR2     | APOC3_TLR2   |
| 63  | HDAC1    | APOC3 | TLR2     | APOC3_TLR2   |
| 64  | SP1      | APOC3 | TLR2     | APOC3_TLR2   |
| 65  | JUN      | APOC3 | TLR2     | APOC3_TLR2   |
| 66  | HNF4A    | APOC3 | TLR2     | APOC3_TLR2   |
| 67  | HDAC3    | APOC3 | TLR2     | APOC3_TLR2   |
| 68  | SMAD3    | APOC3 | TLR2     | APOC3_TLR2   |
| 69  | PPARGC1A | APOC3 | TLR2     | APOC3_TLR2   |
| 70  | PPARA    | APOC3 | TLR2     | APOC3_TLR2   |
| 71  | SMAD4    | APOC3 | TLR2     | APOC3_TLR2   |
| 72  | NR0B2    | APOC3 | TLR2     | APOC3_TLR2   |
| 73  | SP1      | APOE  | LRP5     | APOE_LRP5    |
| 74  | SP1      | APOE  | LRP2     | APOE_LRP2    |
| 75  | SP1      | APOE  | CHRNA4   | APOE_CHRNA4  |
| 76  | SP1      | APOE  | LDLR     | APOE_LDLR    |
| 77  | SP1      | APOE  | LRP1     | APOE_LRP1    |
| 78  | SP1      | APOE  | SCARB1   | APOE_SCARB1  |
| 79  | SP1      | APOE  | LRP8     | APOE_LRP8    |
| 80  | SP1      | APOE  | VLDLR    | APOE_VLDLR   |
| 81  | SP1      | APOE  | SORL1    | APOE_SORL1   |
| 82  | FOXM1    | APOE  | LRP5     | APOE_LRP5    |
| 83  | FOXM1    | APOE  | LRP2     | APOE_LRP2    |
| 84  | FOXM1    | APOE  | CHRNA4   | APOE_CHRNA4  |
| 85  | FOXM1    | APOE  | LDLR     | APOE_LDLR    |
| 86  | FOXM1    | APOE  | LRP1     | APOE_LRP1    |
| 87  | FOXM1    | APOE  | SCARB1   | APOE_SCARB1  |
| 88  | FOXM1    | APOE  | LRP8     | APOE_LRP8    |
| 89  | FOXM1    | APOE  | VLDLR    | APOE_VLDLR   |
| 90  | FOXM1    | APOE  | SORL1    | APOE_SORL1   |
| 91  | ATF4     | APOE  | LRP5     | APOE_LRP5    |
| 92  | ATF4     | APOE  | LRP2     | APOE_LRP2    |
| 93  | ATF4     | APOE  | CHRNA4   | APOE_CHRNA4  |
| 94  | ATF4     | APOE  | LDLR     | APOE_LDLR    |
| 95  | ATF4     | APOE  | LRP1     | APOE_LRP1    |
| 96  | ATF4     | APOE  | SCARB1   | APOE_SCARB1  |
| 97  | ATF4     | APOE  | LRP8     | APOE_LRP8    |
| 98  | ATF4     | APOE  | VLDLR    | APOE_VLDLR   |
| 99  | ATF4     | APOE  | SORL1    | APOE_SORL1   |
| 100 | ETS2     | APP   | LRP1     | APP_LRP1     |
| 101 | ETS2     | APP   | NGFR     | APP_NGFR     |
| 102 | ETS2     | APP   | CAV1     | APP_CAV1     |
| 103 | ETS2     | APP   | FPR2     | APP_FPR2     |
| 104 | ETS2     | APP   | NCSTN    | APP_NCSTN    |
| 105 | ETS2     | APP   | TNFRSF21 | APP_TNFRSF21 |
| 106 | ETS2     | APP   | GPC1     | APP_GPC1     |
| 107 | ETS2     | APP   | CD74     | APP_CD74     |
| 108 | ETS2     | APP   | SLC45A3  | APP_SLC45A3  |
| 109 | TBP      | APP   | LRP1     | APP_LRP1     |
| 110 | TBP      | APP   | NGFR     | APP_NGFR     |
| 111 | TBP      | APP   | CAV1     | APP_CAV1     |
| 112 | TBP      | APP   | FPR2     | APP_FPR2     |
| 113 | TBP      | APP   | NCSTN    | APP_NCSTN    |
| 114 | TBP      | APP   | TNFRSF21 | APP_TNFRSF21 |
| 115 | TBP      | APP   | GPC1     | APP_GPC1     |

|            |     |          |              |
|------------|-----|----------|--------------|
| 116 TBP    | APP | CD74     | APP_CD74     |
| 117 TBP    | APP | SLC45A3  | APP_SLC45A3  |
| 118 TFAP2A | APP | LRP1     | APP_LRP1     |
| 119 TFAP2A | APP | NGFR     | APP_NGFR     |
| 120 TFAP2A | APP | CAV1     | APP_CAV1     |
| 121 TFAP2A | APP | FPR2     | APP_FPR2     |
| 122 TFAP2A | APP | NCSTN    | APP_NCSTN    |
| 123 TFAP2A | APP | TNFRSF21 | APP_TNFRSF21 |
| 124 TFAP2A | APP | GPC1     | APP_GPC1     |
| 125 TFAP2A | APP | CD74     | APP_CD74     |
| 126 TFAP2A | APP | SLC45A3  | APP_SLC45A3  |
| 127 HDAC9  | APP | LRP1     | APP_LRP1     |
| 128 HDAC9  | APP | NGFR     | APP_NGFR     |
| 129 HDAC9  | APP | CAV1     | APP_CAV1     |
| 130 HDAC9  | APP | FPR2     | APP_FPR2     |
| 131 HDAC9  | APP | NCSTN    | APP_NCSTN    |
| 132 HDAC9  | APP | TNFRSF21 | APP_TNFRSF21 |
| 133 HDAC9  | APP | GPC1     | APP_GPC1     |
| 134 HDAC9  | APP | CD74     | APP_CD74     |
| 135 HDAC9  | APP | SLC45A3  | APP_SLC45A3  |
| 136 CTCF   | APP | LRP1     | APP_LRP1     |
| 137 CTCF   | APP | NGFR     | APP_NGFR     |
| 138 CTCF   | APP | CAV1     | APP_CAV1     |
| 139 CTCF   | APP | FPR2     | APP_FPR2     |
| 140 CTCF   | APP | NCSTN    | APP_NCSTN    |
| 141 CTCF   | APP | TNFRSF21 | APP_TNFRSF21 |
| 142 CTCF   | APP | GPC1     | APP_GPC1     |
| 143 CTCF   | APP | CD74     | APP_CD74     |
| 144 CTCF   | APP | SLC45A3  | APP_SLC45A3  |
| 145 NFIL3  | APP | LRP1     | APP_LRP1     |
| 146 NFIL3  | APP | NGFR     | APP_NGFR     |
| 147 NFIL3  | APP | CAV1     | APP_CAV1     |
| 148 NFIL3  | APP | FPR2     | APP_FPR2     |
| 149 NFIL3  | APP | NCSTN    | APP_NCSTN    |
| 150 NFIL3  | APP | TNFRSF21 | APP_TNFRSF21 |
| 151 NFIL3  | APP | GPC1     | APP_GPC1     |
| 152 NFIL3  | APP | CD74     | APP_CD74     |
| 153 NFIL3  | APP | SLC45A3  | APP_SLC45A3  |
| 154 SP1    | APP | LRP1     | APP_LRP1     |
| 155 SP1    | APP | NGFR     | APP_NGFR     |
| 156 SP1    | APP | CAV1     | APP_CAV1     |
| 157 SP1    | APP | FPR2     | APP_FPR2     |
| 158 SP1    | APP | NCSTN    | APP_NCSTN    |
| 159 SP1    | APP | TNFRSF21 | APP_TNFRSF21 |
| 160 SP1    | APP | GPC1     | APP_GPC1     |
| 161 SP1    | APP | CD74     | APP_CD74     |
| 162 SP1    | APP | SLC45A3  | APP_SLC45A3  |
| 163 JUN    | APP | LRP1     | APP_LRP1     |
| 164 JUN    | APP | NGFR     | APP_NGFR     |
| 165 JUN    | APP | CAV1     | APP_CAV1     |
| 166 JUN    | APP | FPR2     | APP_FPR2     |
| 167 JUN    | APP | NCSTN    | APP_NCSTN    |
| 168 JUN    | APP | TNFRSF21 | APP_TNFRSF21 |
| 169 JUN    | APP | GPC1     | APP_GPC1     |
| 170 JUN    | APP | CD74     | APP_CD74     |
| 171 JUN    | APP | SLC45A3  | APP_SLC45A3  |
| 172 STAT1  | APP | LRP1     | APP_LRP1     |
| 173 STAT1  | APP | NGFR     | APP_NGFR     |

|     |       |      |          |              |
|-----|-------|------|----------|--------------|
| 174 | STAT1 | APP  | CAV1     | APP_CAV1     |
| 175 | STAT1 | APP  | FPR2     | APP_FPR2     |
| 176 | STAT1 | APP  | NCSTN    | APP_NCSTN    |
| 177 | STAT1 | APP  | TNFRSF21 | APP_TNFRSF21 |
| 178 | STAT1 | APP  | GPC1     | APP_GPC1     |
| 179 | STAT1 | APP  | CD74     | APP_CD74     |
| 180 | STAT1 | APP  | SLC45A3  | APP_SLC45A3  |
| 181 | BRCA1 | AREG | EGFR     | AREG_EGFR    |
| 182 | BRCA1 | AREG | ERBB3    | AREG_ERBB3   |
| 183 | SP1   | AREG | EGFR     | AREG_EGFR    |
| 184 | SP1   | AREG | ERBB3    | AREG_ERBB3   |
| 185 | NFIL3 | AREG | EGFR     | AREG_EGFR    |
| 186 | NFIL3 | AREG | ERBB3    | AREG_ERBB3   |
| 187 | ZBTB2 | ARF1 | PLD2     | ARF1_PLD2    |
| 188 | ZBTB2 | ARF1 | INSR     | ARF1_INSR    |
| 189 | ZBTB2 | ARF1 | CHRM3    | ARF1_CHRM3   |
| 190 | USF2  | B2M  | CD3D     | B2M_CD3D     |
| 191 | USF2  | B2M  | HLA-F    | B2M_HLA-F    |
| 192 | USF2  | B2M  | KLRC1    | B2M_KLRC1    |
| 193 | USF2  | B2M  | KIR2DL3  | B2M_KIR2DL3  |
| 194 | USF2  | B2M  | TFRC     | B2M_TFRC     |
| 195 | USF2  | B2M  | KIR2DL1  | B2M_KIR2DL1  |
| 196 | USF2  | B2M  | LILRB2   | B2M_LILRB2   |
| 197 | USF2  | B2M  | CD3G     | B2M_CD3G     |
| 198 | USF2  | B2M  | KLRD1    | B2M_KLRD1    |
| 199 | USF2  | B2M  | KIR3DL1  | B2M_KIR3DL1  |
| 200 | USF2  | B2M  | HFE      | B2M_HFE      |
| 201 | USF2  | B2M  | CD1A     | B2M_CD1A     |
| 202 | USF2  | B2M  | CD247    | B2M_CD247    |
| 203 | USF2  | B2M  | CD1B     | B2M_CD1B     |
| 204 | USF2  | B2M  | LILRB1   | B2M_LILRB1   |
| 205 | NFKB1 | B2M  | CD3D     | B2M_CD3D     |
| 206 | NFKB1 | B2M  | HLA-F    | B2M_HLA-F    |
| 207 | NFKB1 | B2M  | KLRC1    | B2M_KLRC1    |
| 208 | NFKB1 | B2M  | KIR2DL3  | B2M_KIR2DL3  |
| 209 | NFKB1 | B2M  | TFRC     | B2M_TFRC     |
| 210 | NFKB1 | B2M  | KIR2DL1  | B2M_KIR2DL1  |
| 211 | NFKB1 | B2M  | LILRB2   | B2M_LILRB2   |
| 212 | NFKB1 | B2M  | CD3G     | B2M_CD3G     |
| 213 | NFKB1 | B2M  | KLRD1    | B2M_KLRD1    |
| 214 | NFKB1 | B2M  | KIR3DL1  | B2M_KIR3DL1  |
| 215 | NFKB1 | B2M  | HFE      | B2M_HFE      |
| 216 | NFKB1 | B2M  | CD1A     | B2M_CD1A     |
| 217 | NFKB1 | B2M  | CD247    | B2M_CD247    |
| 218 | NFKB1 | B2M  | CD1B     | B2M_CD1B     |
| 219 | NFKB1 | B2M  | LILRB1   | B2M_LILRB1   |
| 220 | USF1  | B2M  | CD3D     | B2M_CD3D     |
| 221 | USF1  | B2M  | HLA-F    | B2M_HLA-F    |
| 222 | USF1  | B2M  | KLRC1    | B2M_KLRC1    |
| 223 | USF1  | B2M  | KIR2DL3  | B2M_KIR2DL3  |
| 224 | USF1  | B2M  | TFRC     | B2M_TFRC     |
| 225 | USF1  | B2M  | KIR2DL1  | B2M_KIR2DL1  |
| 226 | USF1  | B2M  | LILRB2   | B2M_LILRB2   |
| 227 | USF1  | B2M  | CD3G     | B2M_CD3G     |
| 228 | USF1  | B2M  | KLRD1    | B2M_KLRD1    |
| 229 | USF1  | B2M  | KIR3DL1  | B2M_KIR3DL1  |
| 230 | USF1  | B2M  | HFE      | B2M_HFE      |
| 231 | USF1  | B2M  | CD1A     | B2M_CD1A     |

|     |       |       |         |              |
|-----|-------|-------|---------|--------------|
| 232 | USF1  | B2M   | CD247   | B2M_CD247    |
| 233 | USF1  | B2M   | CD1B    | B2M_CD1B     |
| 234 | USF1  | B2M   | LILRB1  | B2M_LILRB1   |
| 235 | CREB1 | BDNF  | NGFRAP1 | BDNF_NGFRAP1 |
| 236 | CREB1 | BDNF  | DDR1    | BDNF_DDR1    |
| 237 | REST  | BDNF  | NGFRAP1 | BDNF_NGFRAP1 |
| 238 | REST  | BDNF  | DDR1    | BDNF_DDR1    |
| 239 | NFKB1 | BGN   | TLR2    | BGN_TLR2     |
| 240 | NFKB1 | BGN   | LY96    | BGN_LY96     |
| 241 | NFKB1 | BGN   | TLR4    | BGN_TLR4     |
| 242 | RELA  | BGN   | TLR2    | BGN_TLR2     |
| 243 | RELA  | BGN   | LY96    | BGN_LY96     |
| 244 | RELA  | BGN   | TLR4    | BGN_TLR4     |
| 245 | NFKB1 | BST1  | CAV1    | BST1_CAV1    |
| 246 | CEBPD | C3    | IFITM1  | C3_IFITM1    |
| 247 | CEBPD | C3    | ITGAX   | C3_ITGAX     |
| 248 | CEBPD | C3    | CD81    | C3_CD81      |
| 249 | CEBPD | C3    | ITGB2   | C3_ITGB2     |
| 250 | CEBPD | C3    | C5AR2   | C3_C5AR2     |
| 251 | CEBPD | C3    | LRP1    | C3_LRP1      |
| 252 | CEBPD | C3    | CR1     | C3_CR1       |
| 253 | CEBPD | C3    | C3AR1   | C3_C3AR1     |
| 254 | CEBPD | C3    | ITGAM   | C3_ITGAM     |
| 255 | CEBPD | C3    | CD19    | C3_CD19      |
| 256 | CEBPD | C3    | CD46    | C3_CD46      |
| 257 | SP1   | C4A   | C3AR1   | C4A_C3AR1    |
| 258 | WT1   | CAMP  | FPR2    | CAMP_FPR2    |
| 259 | WT1   | CAMP  | EGFR    | CAMP_EGFR    |
| 260 | VDR   | CAMP  | FPR2    | CAMP_FPR2    |
| 261 | VDR   | CAMP  | EGFR    | CAMP_EGFR    |
| 262 | NR0B1 | CAMP  | FPR2    | CAMP_FPR2    |
| 263 | NR0B1 | CAMP  | EGFR    | CAMP_EGFR    |
| 264 | STAT3 | CCL11 | CXCR3   | CCL11_CXCR3  |
| 265 | RELA  | CCL11 | CXCR3   | CCL11_CXCR3  |
| 266 | NFKB1 | CCL11 | CXCR3   | CCL11_CXCR3  |
| 267 | STAT6 | CCL11 | CXCR3   | CCL11_CXCR3  |
| 268 | YY1   | CCL13 | CXCR3   | CCL13_CXCR3  |
| 269 | NFKB1 | CCL13 | CXCR3   | CCL13_CXCR3  |
| 270 | RELA  | CCL13 | CXCR3   | CCL13_CXCR3  |
| 271 | RELB  | CCL19 | CCR7    | CCL19_CCR7   |
| 272 | RELB  | CCL19 | CXCR3   | CCL19_CXCR3  |
| 273 | RELA  | CCL19 | CCR7    | CCL19_CCR7   |
| 274 | RELA  | CCL19 | CXCR3   | CCL19_CXCR3  |
| 275 | NFKB1 | CCL19 | CCR7    | CCL19_CCR7   |
| 276 | NFKB1 | CCL19 | CXCR3   | CCL19_CXCR3  |
| 277 | RELA  | CCL20 | CCR6    | CCL20_CCR6   |
| 278 | RELA  | CCL20 | CXCR3   | CCL20_CXCR3  |
| 279 | CEBPD | CCL20 | CCR6    | CCL20_CCR6   |
| 280 | CEBPD | CCL20 | CXCR3   | CCL20_CXCR3  |
| 281 | NFKB1 | CCL20 | CCR6    | CCL20_CCR6   |
| 282 | NFKB1 | CCL20 | CXCR3   | CCL20_CXCR3  |
| 283 | NFKB2 | CCL21 | CXCR3   | CCL21_CXCR3  |
| 284 | NFKB2 | CCL21 | CCR7    | CCL21_CCR7   |
| 285 | RELB  | CCL21 | CXCR3   | CCL21_CXCR3  |
| 286 | RELB  | CCL21 | CCR7    | CCL21_CCR7   |
| 287 | RELA  | CCL3  | ACKR2   | CCL3_ACKR2   |
| 288 | RELA  | CCL3  | CCR4    | CCL3_CCR4    |
| 289 | RELA  | CCL3  | CCR1    | CCL3_CCR1    |

|     |       |      |       |            |
|-----|-------|------|-------|------------|
| 290 | RELA  | CCL3 | CCR3  | CCL3_CCR3  |
| 291 | RELA  | CCL3 | CCR5  | CCL3_CCR5  |
| 292 | E2F1  | CCL3 | ACKR2 | CCL3_ACKR2 |
| 293 | E2F1  | CCL3 | CCR4  | CCL3_CCR4  |
| 294 | E2F1  | CCL3 | CCR1  | CCL3_CCR1  |
| 295 | E2F1  | CCL3 | CCR3  | CCL3_CCR3  |
| 296 | E2F1  | CCL3 | CCR5  | CCL3_CCR5  |
| 297 | STAT1 | CCL3 | ACKR2 | CCL3_ACKR2 |
| 298 | STAT1 | CCL3 | CCR4  | CCL3_CCR4  |
| 299 | STAT1 | CCL3 | CCR1  | CCL3_CCR1  |
| 300 | STAT1 | CCL3 | CCR3  | CCL3_CCR3  |
| 301 | STAT1 | CCL3 | CCR5  | CCL3_CCR5  |
| 302 | NFKB1 | CCL3 | ACKR2 | CCL3_ACKR2 |
| 303 | NFKB1 | CCL3 | CCR4  | CCL3_CCR4  |
| 304 | NFKB1 | CCL3 | CCR1  | CCL3_CCR1  |
| 305 | NFKB1 | CCL3 | CCR3  | CCL3_CCR3  |
| 306 | NFKB1 | CCL3 | CCR5  | CCL3_CCR5  |
| 307 | RUNX1 | CCL3 | ACKR2 | CCL3_ACKR2 |
| 308 | RUNX1 | CCL3 | CCR4  | CCL3_CCR4  |
| 309 | RUNX1 | CCL3 | CCR1  | CCL3_CCR1  |
| 310 | RUNX1 | CCL3 | CCR3  | CCL3_CCR3  |
| 311 | RUNX1 | CCL3 | CCR5  | CCL3_CCR5  |
| 312 | CREM  | CCL4 | CCR1  | CCL4_CCR1  |
| 313 | CREM  | CCL4 | ACKR2 | CCL4_ACKR2 |
| 314 | CREM  | CCL4 | CCR8  | CCL4_CCR8  |
| 315 | CREM  | CCL4 | CCR5  | CCL4_CCR5  |
| 316 | CREM  | CCL4 | CCR3  | CCL4_CCR3  |
| 317 | RELA  | CCL4 | CCR1  | CCL4_CCR1  |
| 318 | RELA  | CCL4 | ACKR2 | CCL4_ACKR2 |
| 319 | RELA  | CCL4 | CCR8  | CCL4_CCR8  |
| 320 | RELA  | CCL4 | CCR5  | CCL4_CCR5  |
| 321 | RELA  | CCL4 | CCR3  | CCL4_CCR3  |
| 322 | NFKB1 | CCL4 | CCR1  | CCL4_CCR1  |
| 323 | NFKB1 | CCL4 | ACKR2 | CCL4_ACKR2 |
| 324 | NFKB1 | CCL4 | CCR8  | CCL4_CCR8  |
| 325 | NFKB1 | CCL4 | CCR5  | CCL4_CCR5  |
| 326 | NFKB1 | CCL4 | CCR3  | CCL4_CCR3  |
| 327 | JUND  | CCL5 | SDC1  | CCL5_SDC1  |
| 328 | JUND  | CCL5 | CCR5  | CCL5_CCR5  |
| 329 | JUND  | CCL5 | CCR4  | CCL5_CCR4  |
| 330 | JUND  | CCL5 | CCR1  | CCL5_CCR1  |
| 331 | JUND  | CCL5 | GPR75 | CCL5_GPR75 |
| 332 | JUND  | CCL5 | SDC4  | CCL5_SDC4  |
| 333 | JUND  | CCL5 | ACKR4 | CCL5_ACKR4 |
| 334 | JUND  | CCL5 | ACKR2 | CCL5_ACKR2 |
| 335 | JUND  | CCL5 | CXCR3 | CCL5_CXCR3 |
| 336 | JUND  | CCL5 | DARC  | CCL5_DARC  |
| 337 | JUND  | CCL5 | CCR3  | CCL5_CCR3  |
| 338 | SPI1  | CCL5 | SDC1  | CCL5_SDC1  |
| 339 | SPI1  | CCL5 | CCR5  | CCL5_CCR5  |
| 340 | SPI1  | CCL5 | CCR4  | CCL5_CCR4  |
| 341 | SPI1  | CCL5 | CCR1  | CCL5_CCR1  |
| 342 | SPI1  | CCL5 | GPR75 | CCL5_GPR75 |
| 343 | SPI1  | CCL5 | SDC4  | CCL5_SDC4  |
| 344 | SPI1  | CCL5 | ACKR4 | CCL5_ACKR4 |
| 345 | SPI1  | CCL5 | ACKR2 | CCL5_ACKR2 |
| 346 | SPI1  | CCL5 | CXCR3 | CCL5_CXCR3 |
| 347 | SPI1  | CCL5 | DARC  | CCL5_DARC  |

|            |      |       |            |
|------------|------|-------|------------|
| 348 SPI1   | CCL5 | CCR3  | CCL5_CCR3  |
| 349 NFKBIA | CCL5 | SDC1  | CCL5_SDC1  |
| 350 NFKBIA | CCL5 | CCR5  | CCL5_CCR5  |
| 351 NFKBIA | CCL5 | CCR4  | CCL5_CCR4  |
| 352 NFKBIA | CCL5 | CCR1  | CCL5_CCR1  |
| 353 NFKBIA | CCL5 | GPR75 | CCL5_GPR75 |
| 354 NFKBIA | CCL5 | SDC4  | CCL5_SDC4  |
| 355 NFKBIA | CCL5 | ACKR4 | CCL5_ACKR4 |
| 356 NFKBIA | CCL5 | ACKR2 | CCL5_ACKR2 |
| 357 NFKBIA | CCL5 | CXCR3 | CCL5_CXCR3 |
| 358 NFKBIA | CCL5 | DARC  | CCL5_DARC  |
| 359 NFKBIA | CCL5 | CCR3  | CCL5_CCR3  |
| 360 KLF13  | CCL5 | SDC1  | CCL5_SDC1  |
| 361 KLF13  | CCL5 | CCR5  | CCL5_CCR5  |
| 362 KLF13  | CCL5 | CCR4  | CCL5_CCR4  |
| 363 KLF13  | CCL5 | CCR1  | CCL5_CCR1  |
| 364 KLF13  | CCL5 | GPR75 | CCL5_GPR75 |
| 365 KLF13  | CCL5 | SDC4  | CCL5_SDC4  |
| 366 KLF13  | CCL5 | ACKR4 | CCL5_ACKR4 |
| 367 KLF13  | CCL5 | ACKR2 | CCL5_ACKR2 |
| 368 KLF13  | CCL5 | CXCR3 | CCL5_CXCR3 |
| 369 KLF13  | CCL5 | DARC  | CCL5_DARC  |
| 370 KLF13  | CCL5 | CCR3  | CCL5_CCR3  |
| 371 NFKB1  | CCL5 | SDC1  | CCL5_SDC1  |
| 372 NFKB1  | CCL5 | CCR5  | CCL5_CCR5  |
| 373 NFKB1  | CCL5 | CCR4  | CCL5_CCR4  |
| 374 NFKB1  | CCL5 | CCR1  | CCL5_CCR1  |
| 375 NFKB1  | CCL5 | GPR75 | CCL5_GPR75 |
| 376 NFKB1  | CCL5 | SDC4  | CCL5_SDC4  |
| 377 NFKB1  | CCL5 | ACKR4 | CCL5_ACKR4 |
| 378 NFKB1  | CCL5 | ACKR2 | CCL5_ACKR2 |
| 379 NFKB1  | CCL5 | CXCR3 | CCL5_CXCR3 |
| 380 NFKB1  | CCL5 | DARC  | CCL5_DARC  |
| 381 NFKB1  | CCL5 | CCR3  | CCL5_CCR3  |
| 382 IRF7   | CCL5 | SDC1  | CCL5_SDC1  |
| 383 IRF7   | CCL5 | CCR5  | CCL5_CCR5  |
| 384 IRF7   | CCL5 | CCR4  | CCL5_CCR4  |
| 385 IRF7   | CCL5 | CCR1  | CCL5_CCR1  |
| 386 IRF7   | CCL5 | GPR75 | CCL5_GPR75 |
| 387 IRF7   | CCL5 | SDC4  | CCL5_SDC4  |
| 388 IRF7   | CCL5 | ACKR4 | CCL5_ACKR4 |
| 389 IRF7   | CCL5 | ACKR2 | CCL5_ACKR2 |
| 390 IRF7   | CCL5 | CXCR3 | CCL5_CXCR3 |
| 391 IRF7   | CCL5 | DARC  | CCL5_DARC  |
| 392 IRF7   | CCL5 | CCR3  | CCL5_CCR3  |
| 393 ATF3   | CCL5 | SDC1  | CCL5_SDC1  |
| 394 ATF3   | CCL5 | CCR5  | CCL5_CCR5  |
| 395 ATF3   | CCL5 | CCR4  | CCL5_CCR4  |
| 396 ATF3   | CCL5 | CCR1  | CCL5_CCR1  |
| 397 ATF3   | CCL5 | GPR75 | CCL5_GPR75 |
| 398 ATF3   | CCL5 | SDC4  | CCL5_SDC4  |
| 399 ATF3   | CCL5 | ACKR4 | CCL5_ACKR4 |
| 400 ATF3   | CCL5 | ACKR2 | CCL5_ACKR2 |
| 401 ATF3   | CCL5 | CXCR3 | CCL5_CXCR3 |
| 402 ATF3   | CCL5 | DARC  | CCL5_DARC  |
| 403 ATF3   | CCL5 | CCR3  | CCL5_CCR3  |
| 404 SP1    | CCL5 | SDC1  | CCL5_SDC1  |
| 405 SP1    | CCL5 | CCR5  | CCL5_CCR5  |

|           |      |       |            |
|-----------|------|-------|------------|
| 406 SP1   | CCL5 | CCR4  | CCL5_CCR4  |
| 407 SP1   | CCL5 | CCR1  | CCL5_CCR1  |
| 408 SP1   | CCL5 | GPR75 | CCL5_GPR75 |
| 409 SP1   | CCL5 | SDC4  | CCL5_SDC4  |
| 410 SP1   | CCL5 | ACKR4 | CCL5_ACKR4 |
| 411 SP1   | CCL5 | ACKR2 | CCL5_ACKR2 |
| 412 SP1   | CCL5 | CXCR3 | CCL5_CXCR3 |
| 413 SP1   | CCL5 | DARC  | CCL5_DARC  |
| 414 SP1   | CCL5 | CCR3  | CCL5_CCR3  |
| 415 CREB1 | CCL5 | SDC1  | CCL5_SDC1  |
| 416 CREB1 | CCL5 | CCR5  | CCL5_CCR5  |
| 417 CREB1 | CCL5 | CCR4  | CCL5_CCR4  |
| 418 CREB1 | CCL5 | CCR1  | CCL5_CCR1  |
| 419 CREB1 | CCL5 | GPR75 | CCL5_GPR75 |
| 420 CREB1 | CCL5 | SDC4  | CCL5_SDC4  |
| 421 CREB1 | CCL5 | ACKR4 | CCL5_ACKR4 |
| 422 CREB1 | CCL5 | ACKR2 | CCL5_ACKR2 |
| 423 CREB1 | CCL5 | CXCR3 | CCL5_CXCR3 |
| 424 CREB1 | CCL5 | DARC  | CCL5_DARC  |
| 425 CREB1 | CCL5 | CCR3  | CCL5_CCR3  |
| 426 IRF1  | CCL5 | SDC1  | CCL5_SDC1  |
| 427 IRF1  | CCL5 | CCR5  | CCL5_CCR5  |
| 428 IRF1  | CCL5 | CCR4  | CCL5_CCR4  |
| 429 IRF1  | CCL5 | CCR1  | CCL5_CCR1  |
| 430 IRF1  | CCL5 | GPR75 | CCL5_GPR75 |
| 431 IRF1  | CCL5 | SDC4  | CCL5_SDC4  |
| 432 IRF1  | CCL5 | ACKR4 | CCL5_ACKR4 |
| 433 IRF1  | CCL5 | ACKR2 | CCL5_ACKR2 |
| 434 IRF1  | CCL5 | CXCR3 | CCL5_CXCR3 |
| 435 IRF1  | CCL5 | DARC  | CCL5_DARC  |
| 436 IRF1  | CCL5 | CCR3  | CCL5_CCR3  |
| 437 RELA  | CCL5 | SDC1  | CCL5_SDC1  |
| 438 RELA  | CCL5 | CCR5  | CCL5_CCR5  |
| 439 RELA  | CCL5 | CCR4  | CCL5_CCR4  |
| 440 RELA  | CCL5 | CCR1  | CCL5_CCR1  |
| 441 RELA  | CCL5 | GPR75 | CCL5_GPR75 |
| 442 RELA  | CCL5 | SDC4  | CCL5_SDC4  |
| 443 RELA  | CCL5 | ACKR4 | CCL5_ACKR4 |
| 444 RELA  | CCL5 | ACKR2 | CCL5_ACKR2 |
| 445 RELA  | CCL5 | CXCR3 | CCL5_CXCR3 |
| 446 RELA  | CCL5 | DARC  | CCL5_DARC  |
| 447 RELA  | CCL5 | CCR3  | CCL5_CCR3  |
| 448 IRF3  | CCL5 | SDC1  | CCL5_SDC1  |
| 449 IRF3  | CCL5 | CCR5  | CCL5_CCR5  |
| 450 IRF3  | CCL5 | CCR4  | CCL5_CCR4  |
| 451 IRF3  | CCL5 | CCR1  | CCL5_CCR1  |
| 452 IRF3  | CCL5 | GPR75 | CCL5_GPR75 |
| 453 IRF3  | CCL5 | SDC4  | CCL5_SDC4  |
| 454 IRF3  | CCL5 | ACKR4 | CCL5_ACKR4 |
| 455 IRF3  | CCL5 | ACKR2 | CCL5_ACKR2 |
| 456 IRF3  | CCL5 | CXCR3 | CCL5_CXCR3 |
| 457 IRF3  | CCL5 | DARC  | CCL5_DARC  |
| 458 IRF3  | CCL5 | CCR3  | CCL5_CCR3  |
| 459 REL   | CCL5 | SDC1  | CCL5_SDC1  |
| 460 REL   | CCL5 | CCR5  | CCL5_CCR5  |
| 461 REL   | CCL5 | CCR4  | CCL5_CCR4  |
| 462 REL   | CCL5 | CCR1  | CCL5_CCR1  |
| 463 REL   | CCL5 | GPR75 | CCL5_GPR75 |



|           |        |       |              |
|-----------|--------|-------|--------------|
| 464 REL   | CCL5   | SDC4  | CCL5_SDC4    |
| 465 REL   | CCL5   | ACKR4 | CCL5_ACKR4   |
| 466 REL   | CCL5   | ACKR2 | CCL5_ACKR2   |
| 467 REL   | CCL5   | CXCR3 | CCL5_CXCR3   |
| 468 REL   | CCL5   | DARC  | CCL5_DARC    |
| 469 REL   | CCL5   | CCR3  | CCL5_CCR3    |
| 470 JUN   | CCL5   | SDC1  | CCL5_SDC1    |
| 471 JUN   | CCL5   | CCR5  | CCL5_CCR5    |
| 472 JUN   | CCL5   | CCR4  | CCL5_CCR4    |
| 473 JUN   | CCL5   | CCR1  | CCL5_CCR1    |
| 474 JUN   | CCL5   | GPR75 | CCL5_GPR75   |
| 475 JUN   | CCL5   | SDC4  | CCL5_SDC4    |
| 476 JUN   | CCL5   | ACKR4 | CCL5_ACKR4   |
| 477 JUN   | CCL5   | ACKR2 | CCL5_ACKR2   |
| 478 JUN   | CCL5   | CXCR3 | CCL5_CXCR3   |
| 479 JUN   | CCL5   | DARC  | CCL5_DARC    |
| 480 JUN   | CCL5   | CCR3  | CCL5_CCR3    |
| 481 LEF1  | CCL7   | CXCR3 | CCL7_CXCR3   |
| 482 SP3   | CD14   | ITGB1 | CD14_ITGB1   |
| 483 SP3   | CD14   | ITGA4 | CD14_ITGA4   |
| 484 SP1   | CD14   | ITGB1 | CD14_ITGB1   |
| 485 SP1   | CD14   | ITGA4 | CD14_ITGA4   |
| 486 WT1   | CD14   | ITGB1 | CD14_ITGB1   |
| 487 WT1   | CD14   | ITGA4 | CD14_ITGA4   |
| 488 MEF2D | CD14   | ITGB1 | CD14_ITGB1   |
| 489 MEF2D | CD14   | ITGA4 | CD14_ITGA4   |
| 490 SP2   | CD14   | ITGB1 | CD14_ITGB1   |
| 491 SP2   | CD14   | ITGA4 | CD14_ITGA4   |
| 492 KLF4  | CD14   | ITGB1 | CD14_ITGB1   |
| 493 KLF4  | CD14   | ITGA4 | CD14_ITGA4   |
| 494 VDR   | CD14   | ITGB1 | CD14_ITGB1   |
| 495 VDR   | CD14   | ITGA4 | CD14_ITGA4   |
| 496 ESR1  | CD24   | SELP  | CD24_SELP    |
| 497 MYB   | CD34   | SELL  | CD34_SELL    |
| 498 TAL1  | CD34   | SELL  | CD34_SELL    |
| 499 RUNX1 | CD34   | SELL  | CD34_SELL    |
| 500 MZF1  | CD34   | SELL  | CD34_SELL    |
| 501 NFKB1 | CD40LG | CD40  | CD40LG_CD40  |
| 502 NFKB1 | CD40LG | TRAF3 | CD40LG_TRAF3 |
| 503 NFKB1 | CD40LG | ITGB2 | CD40LG_ITGB2 |
| 504 NFKB1 | CD40LG | ITGAM | CD40LG_ITGAM |
| 505 RELA  | CD40LG | CD40  | CD40LG_CD40  |
| 506 RELA  | CD40LG | TRAF3 | CD40LG_TRAF3 |
| 507 RELA  | CD40LG | ITGB2 | CD40LG_ITGB2 |
| 508 RELA  | CD40LG | ITGAM | CD40LG_ITGAM |
| 509 FOS   | CD40LG | CD40  | CD40LG_CD40  |
| 510 FOS   | CD40LG | TRAF3 | CD40LG_TRAF3 |
| 511 FOS   | CD40LG | ITGB2 | CD40LG_ITGB2 |
| 512 FOS   | CD40LG | ITGAM | CD40LG_ITGAM |
| 513 STAT1 | CD40LG | CD40  | CD40LG_CD40  |
| 514 STAT1 | CD40LG | TRAF3 | CD40LG_TRAF3 |
| 515 STAT1 | CD40LG | ITGB2 | CD40LG_ITGB2 |
| 516 STAT1 | CD40LG | ITGAM | CD40LG_ITGAM |
| 517 GATA3 | CD40LG | CD40  | CD40LG_CD40  |
| 518 GATA3 | CD40LG | TRAF3 | CD40LG_TRAF3 |
| 519 GATA3 | CD40LG | ITGB2 | CD40LG_ITGB2 |
| 520 GATA3 | CD40LG | ITGAM | CD40LG_ITGAM |
| 521 JUND  | CD40LG | CD40  | CD40LG_CD40  |

|            |        |       |              |
|------------|--------|-------|--------------|
| 522 JUND   | CD40LG | TRAF3 | CD40LG_TRAF3 |
| 523 JUND   | CD40LG | ITGB2 | CD40LG_ITGB2 |
| 524 JUND   | CD40LG | ITGAM | CD40LG_ITGAM |
| 525 REL    | CD40LG | CD40  | CD40LG_CD40  |
| 526 REL    | CD40LG | TRAF3 | CD40LG_TRAF3 |
| 527 REL    | CD40LG | ITGB2 | CD40LG_ITGB2 |
| 528 REL    | CD40LG | ITGAM | CD40LG_ITGAM |
| 529 RFX1   | CD70   | CD27  | CD70_CD27    |
| 530 HDAC1  | CDH1   | CDH2  | CDH1_CDH2    |
| 531 HDAC1  | CDH1   | PTPRM | CDH1_PTPRM   |
| 532 HDAC1  | CDH1   | ERBB3 | CDH1_ERBB3   |
| 533 HDAC1  | CDH1   | KLRG1 | CDH1_KLRG1   |
| 534 HDAC1  | CDH1   | PTPRF | CDH1_PTPRF   |
| 535 HDAC1  | CDH1   | EGFR  | CDH1_EGFR    |
| 536 PARP1  | CDH1   | CDH2  | CDH1_CDH2    |
| 537 PARP1  | CDH1   | PTPRM | CDH1_PTPRM   |
| 538 PARP1  | CDH1   | ERBB3 | CDH1_ERBB3   |
| 539 PARP1  | CDH1   | KLRG1 | CDH1_KLRG1   |
| 540 PARP1  | CDH1   | PTPRF | CDH1_PTPRF   |
| 541 PARP1  | CDH1   | EGFR  | CDH1_EGFR    |
| 542 DNMT1  | CDH1   | CDH2  | CDH1_CDH2    |
| 543 DNMT1  | CDH1   | PTPRM | CDH1_PTPRM   |
| 544 DNMT1  | CDH1   | ERBB3 | CDH1_ERBB3   |
| 545 DNMT1  | CDH1   | KLRG1 | CDH1_KLRG1   |
| 546 DNMT1  | CDH1   | PTPRF | CDH1_PTPRF   |
| 547 DNMT1  | CDH1   | EGFR  | CDH1_EGFR    |
| 548 YBX1   | CDH1   | CDH2  | CDH1_CDH2    |
| 549 YBX1   | CDH1   | PTPRM | CDH1_PTPRM   |
| 550 YBX1   | CDH1   | ERBB3 | CDH1_ERBB3   |
| 551 YBX1   | CDH1   | KLRG1 | CDH1_KLRG1   |
| 552 YBX1   | CDH1   | PTPRF | CDH1_PTPRF   |
| 553 YBX1   | CDH1   | EGFR  | CDH1_EGFR    |
| 554 RELA   | CDH1   | CDH2  | CDH1_CDH2    |
| 555 RELA   | CDH1   | PTPRM | CDH1_PTPRM   |
| 556 RELA   | CDH1   | ERBB3 | CDH1_ERBB3   |
| 557 RELA   | CDH1   | KLRG1 | CDH1_KLRG1   |
| 558 RELA   | CDH1   | PTPRF | CDH1_PTPRF   |
| 559 RELA   | CDH1   | EGFR  | CDH1_EGFR    |
| 560 TCF12  | CDH1   | CDH2  | CDH1_CDH2    |
| 561 TCF12  | CDH1   | PTPRM | CDH1_PTPRM   |
| 562 TCF12  | CDH1   | ERBB3 | CDH1_ERBB3   |
| 563 TCF12  | CDH1   | KLRG1 | CDH1_KLRG1   |
| 564 TCF12  | CDH1   | PTPRF | CDH1_PTPRF   |
| 565 TCF12  | CDH1   | EGFR  | CDH1_EGFR    |
| 566 TWIST1 | CDH1   | CDH2  | CDH1_CDH2    |
| 567 TWIST1 | CDH1   | PTPRM | CDH1_PTPRM   |
| 568 TWIST1 | CDH1   | ERBB3 | CDH1_ERBB3   |
| 569 TWIST1 | CDH1   | KLRG1 | CDH1_KLRG1   |
| 570 TWIST1 | CDH1   | PTPRF | CDH1_PTPRF   |
| 571 TWIST1 | CDH1   | EGFR  | CDH1_EGFR    |
| 572 SIX1   | CDH1   | CDH2  | CDH1_CDH2    |
| 573 SIX1   | CDH1   | PTPRM | CDH1_PTPRM   |
| 574 SIX1   | CDH1   | ERBB3 | CDH1_ERBB3   |
| 575 SIX1   | CDH1   | KLRG1 | CDH1_KLRG1   |
| 576 SIX1   | CDH1   | PTPRF | CDH1_PTPRF   |
| 577 SIX1   | CDH1   | EGFR  | CDH1_EGFR    |
| 578 FOXF1  | CDH1   | CDH2  | CDH1_CDH2    |
| 579 FOXF1  | CDH1   | PTPRM | CDH1_PTPRM   |

|     |         |      |       |            |
|-----|---------|------|-------|------------|
| 580 | FOXF1   | CDH1 | ERBB3 | CDH1_ERBB3 |
| 581 | FOXF1   | CDH1 | KLRG1 | CDH1_KLRG1 |
| 582 | FOXF1   | CDH1 | PTPRF | CDH1_PTPRF |
| 583 | FOXF1   | CDH1 | EGFR  | CDH1_EGFR  |
| 584 | GLI2    | CDH1 | CDH2  | CDH1_CDH2  |
| 585 | GLI2    | CDH1 | PTPRM | CDH1_PTPRM |
| 586 | GLI2    | CDH1 | ERBB3 | CDH1_ERBB3 |
| 587 | GLI2    | CDH1 | KLRG1 | CDH1_KLRG1 |
| 588 | GLI2    | CDH1 | PTPRF | CDH1_PTPRF |
| 589 | GLI2    | CDH1 | EGFR  | CDH1_EGFR  |
| 590 | MTA2    | CDH1 | CDH2  | CDH1_CDH2  |
| 591 | MTA2    | CDH1 | PTPRM | CDH1_PTPRM |
| 592 | MTA2    | CDH1 | ERBB3 | CDH1_ERBB3 |
| 593 | MTA2    | CDH1 | KLRG1 | CDH1_KLRG1 |
| 594 | MTA2    | CDH1 | PTPRF | CDH1_PTPRF |
| 595 | MTA2    | CDH1 | EGFR  | CDH1_EGFR  |
| 596 | HDAC3   | CDH1 | CDH2  | CDH1_CDH2  |
| 597 | HDAC3   | CDH1 | PTPRM | CDH1_PTPRM |
| 598 | HDAC3   | CDH1 | ERBB3 | CDH1_ERBB3 |
| 599 | HDAC3   | CDH1 | KLRG1 | CDH1_KLRG1 |
| 600 | HDAC3   | CDH1 | PTPRF | CDH1_PTPRF |
| 601 | HDAC3   | CDH1 | EGFR  | CDH1_EGFR  |
| 602 | FOXQ1   | CDH1 | CDH2  | CDH1_CDH2  |
| 603 | FOXQ1   | CDH1 | PTPRM | CDH1_PTPRM |
| 604 | FOXQ1   | CDH1 | ERBB3 | CDH1_ERBB3 |
| 605 | FOXQ1   | CDH1 | KLRG1 | CDH1_KLRG1 |
| 606 | FOXQ1   | CDH1 | PTPRF | CDH1_PTPRF |
| 607 | FOXQ1   | CDH1 | EGFR  | CDH1_EGFR  |
| 608 | SPDEF   | CDH1 | CDH2  | CDH1_CDH2  |
| 609 | SPDEF   | CDH1 | PTPRM | CDH1_PTPRM |
| 610 | SPDEF   | CDH1 | ERBB3 | CDH1_ERBB3 |
| 611 | SPDEF   | CDH1 | KLRG1 | CDH1_KLRG1 |
| 612 | SPDEF   | CDH1 | PTPRF | CDH1_PTPRF |
| 613 | SPDEF   | CDH1 | EGFR  | CDH1_EGFR  |
| 614 | TFAP2A  | CDH1 | CDH2  | CDH1_CDH2  |
| 615 | TFAP2A  | CDH1 | PTPRM | CDH1_PTPRM |
| 616 | TFAP2A  | CDH1 | ERBB3 | CDH1_ERBB3 |
| 617 | TFAP2A  | CDH1 | KLRG1 | CDH1_KLRG1 |
| 618 | TFAP2A  | CDH1 | PTPRF | CDH1_PTPRF |
| 619 | TFAP2A  | CDH1 | EGFR  | CDH1_EGFR  |
| 620 | KLF8    | CDH1 | CDH2  | CDH1_CDH2  |
| 621 | KLF8    | CDH1 | PTPRM | CDH1_PTPRM |
| 622 | KLF8    | CDH1 | ERBB3 | CDH1_ERBB3 |
| 623 | KLF8    | CDH1 | KLRG1 | CDH1_KLRG1 |
| 624 | KLF8    | CDH1 | PTPRF | CDH1_PTPRF |
| 625 | KLF8    | CDH1 | EGFR  | CDH1_EGFR  |
| 626 | SMARCA4 | CDH1 | CDH2  | CDH1_CDH2  |
| 627 | SMARCA4 | CDH1 | PTPRM | CDH1_PTPRM |
| 628 | SMARCA4 | CDH1 | ERBB3 | CDH1_ERBB3 |
| 629 | SMARCA4 | CDH1 | KLRG1 | CDH1_KLRG1 |
| 630 | SMARCA4 | CDH1 | PTPRF | CDH1_PTPRF |
| 631 | SMARCA4 | CDH1 | EGFR  | CDH1_EGFR  |
| 632 | FOXA2   | CDH1 | CDH2  | CDH1_CDH2  |
| 633 | FOXA2   | CDH1 | PTPRM | CDH1_PTPRM |
| 634 | FOXA2   | CDH1 | ERBB3 | CDH1_ERBB3 |
| 635 | FOXA2   | CDH1 | KLRG1 | CDH1_KLRG1 |
| 636 | FOXA2   | CDH1 | PTPRF | CDH1_PTPRF |
| 637 | FOXA2   | CDH1 | EGFR  | CDH1_EGFR  |

|     |        |      |       |            |
|-----|--------|------|-------|------------|
| 638 | TWIST2 | CDH1 | CDH2  | CDH1_CDH2  |
| 639 | TWIST2 | CDH1 | PTPRM | CDH1_PTPRM |
| 640 | TWIST2 | CDH1 | ERBB3 | CDH1_ERBB3 |
| 641 | TWIST2 | CDH1 | KLRG1 | CDH1_KLRG1 |
| 642 | TWIST2 | CDH1 | PTPRF | CDH1_PTPRF |
| 643 | TWIST2 | CDH1 | EGFR  | CDH1_EGFR  |
| 644 | WT1    | CDH1 | CDH2  | CDH1_CDH2  |
| 645 | WT1    | CDH1 | PTPRM | CDH1_PTPRM |
| 646 | WT1    | CDH1 | ERBB3 | CDH1_ERBB3 |
| 647 | WT1    | CDH1 | KLRG1 | CDH1_KLRG1 |
| 648 | WT1    | CDH1 | PTPRF | CDH1_PTPRF |
| 649 | WT1    | CDH1 | EGFR  | CDH1_EGFR  |
| 650 | HMGA1  | CDH1 | CDH2  | CDH1_CDH2  |
| 651 | HMGA1  | CDH1 | PTPRM | CDH1_PTPRM |
| 652 | HMGA1  | CDH1 | ERBB3 | CDH1_ERBB3 |
| 653 | HMGA1  | CDH1 | KLRG1 | CDH1_KLRG1 |
| 654 | HMGA1  | CDH1 | PTPRF | CDH1_PTPRF |
| 655 | HMGA1  | CDH1 | EGFR  | CDH1_EGFR  |
| 656 | ZEB1   | CDH1 | CDH2  | CDH1_CDH2  |
| 657 | ZEB1   | CDH1 | PTPRM | CDH1_PTPRM |
| 658 | ZEB1   | CDH1 | ERBB3 | CDH1_ERBB3 |
| 659 | ZEB1   | CDH1 | KLRG1 | CDH1_KLRG1 |
| 660 | ZEB1   | CDH1 | PTPRF | CDH1_PTPRF |
| 661 | ZEB1   | CDH1 | EGFR  | CDH1_EGFR  |
| 662 | EZH2   | CDH1 | CDH2  | CDH1_CDH2  |
| 663 | EZH2   | CDH1 | PTPRM | CDH1_PTPRM |
| 664 | EZH2   | CDH1 | ERBB3 | CDH1_ERBB3 |
| 665 | EZH2   | CDH1 | KLRG1 | CDH1_KLRG1 |
| 666 | EZH2   | CDH1 | PTPRF | CDH1_PTPRF |
| 667 | EZH2   | CDH1 | EGFR  | CDH1_EGFR  |
| 668 | HOXA7  | CDH1 | CDH2  | CDH1_CDH2  |
| 669 | HOXA7  | CDH1 | PTPRM | CDH1_PTPRM |
| 670 | HOXA7  | CDH1 | ERBB3 | CDH1_ERBB3 |
| 671 | HOXA7  | CDH1 | KLRG1 | CDH1_KLRG1 |
| 672 | HOXA7  | CDH1 | PTPRF | CDH1_PTPRF |
| 673 | HOXA7  | CDH1 | EGFR  | CDH1_EGFR  |
| 674 | ESR1   | CDH1 | CDH2  | CDH1_CDH2  |
| 675 | ESR1   | CDH1 | PTPRM | CDH1_PTPRM |
| 676 | ESR1   | CDH1 | ERBB3 | CDH1_ERBB3 |
| 677 | ESR1   | CDH1 | KLRG1 | CDH1_KLRG1 |
| 678 | ESR1   | CDH1 | PTPRF | CDH1_PTPRF |
| 679 | ESR1   | CDH1 | EGFR  | CDH1_EGFR  |
| 680 | SNAI2  | CDH1 | CDH2  | CDH1_CDH2  |
| 681 | SNAI2  | CDH1 | PTPRM | CDH1_PTPRM |
| 682 | SNAI2  | CDH1 | ERBB3 | CDH1_ERBB3 |
| 683 | SNAI2  | CDH1 | KLRG1 | CDH1_KLRG1 |
| 684 | SNAI2  | CDH1 | PTPRF | CDH1_PTPRF |
| 685 | SNAI2  | CDH1 | EGFR  | CDH1_EGFR  |
| 686 | HIF1A  | CDH1 | CDH2  | CDH1_CDH2  |
| 687 | HIF1A  | CDH1 | PTPRM | CDH1_PTPRM |
| 688 | HIF1A  | CDH1 | ERBB3 | CDH1_ERBB3 |
| 689 | HIF1A  | CDH1 | KLRG1 | CDH1_KLRG1 |
| 690 | HIF1A  | CDH1 | PTPRF | CDH1_PTPRF |
| 691 | HIF1A  | CDH1 | EGFR  | CDH1_EGFR  |
| 692 | SIRT1  | CDH1 | CDH2  | CDH1_CDH2  |
| 693 | SIRT1  | CDH1 | PTPRM | CDH1_PTPRM |
| 694 | SIRT1  | CDH1 | ERBB3 | CDH1_ERBB3 |
| 695 | SIRT1  | CDH1 | KLRG1 | CDH1_KLRG1 |

|           |      |       |            |
|-----------|------|-------|------------|
| 696 SIRT1 | CDH1 | PTPRF | CDH1_PTPRF |
| 697 SIRT1 | CDH1 | EGFR  | CDH1_EGFR  |
| 698 SALL4 | CDH1 | CDH2  | CDH1_CDH2  |
| 699 SALL4 | CDH1 | PTPRM | CDH1_PTPRM |
| 700 SALL4 | CDH1 | ERBB3 | CDH1_ERBB3 |
| 701 SALL4 | CDH1 | KLRG1 | CDH1_KLRG1 |
| 702 SALL4 | CDH1 | PTPRF | CDH1_PTPRF |
| 703 SALL4 | CDH1 | EGFR  | CDH1_EGFR  |
| 704 ZEB2  | CDH1 | CDH2  | CDH1_CDH2  |
| 705 ZEB2  | CDH1 | PTPRM | CDH1_PTPRM |
| 706 ZEB2  | CDH1 | ERBB3 | CDH1_ERBB3 |
| 707 ZEB2  | CDH1 | KLRG1 | CDH1_KLRG1 |
| 708 ZEB2  | CDH1 | PTPRF | CDH1_PTPRF |
| 709 ZEB2  | CDH1 | EGFR  | CDH1_EGFR  |
| 710 VDR   | CDH1 | CDH2  | CDH1_CDH2  |
| 711 VDR   | CDH1 | PTPRM | CDH1_PTPRM |
| 712 VDR   | CDH1 | ERBB3 | CDH1_ERBB3 |
| 713 VDR   | CDH1 | KLRG1 | CDH1_KLRG1 |
| 714 VDR   | CDH1 | PTPRF | CDH1_PTPRF |
| 715 VDR   | CDH1 | EGFR  | CDH1_EGFR  |
| 716 KLF6  | CDH1 | CDH2  | CDH1_CDH2  |
| 717 KLF6  | CDH1 | PTPRM | CDH1_PTPRM |
| 718 KLF6  | CDH1 | ERBB3 | CDH1_ERBB3 |
| 719 KLF6  | CDH1 | KLRG1 | CDH1_KLRG1 |
| 720 KLF6  | CDH1 | PTPRF | CDH1_PTPRF |
| 721 KLF6  | CDH1 | EGFR  | CDH1_EGFR  |
| 722 RBBP7 | CDH1 | CDH2  | CDH1_CDH2  |
| 723 RBBP7 | CDH1 | PTPRM | CDH1_PTPRM |
| 724 RBBP7 | CDH1 | ERBB3 | CDH1_ERBB3 |
| 725 RBBP7 | CDH1 | KLRG1 | CDH1_KLRG1 |
| 726 RBBP7 | CDH1 | PTPRF | CDH1_PTPRF |
| 727 RBBP7 | CDH1 | EGFR  | CDH1_EGFR  |
| 728 GATA3 | CDH1 | CDH2  | CDH1_CDH2  |
| 729 GATA3 | CDH1 | PTPRM | CDH1_PTPRM |
| 730 GATA3 | CDH1 | ERBB3 | CDH1_ERBB3 |
| 731 GATA3 | CDH1 | KLRG1 | CDH1_KLRG1 |
| 732 GATA3 | CDH1 | PTPRF | CDH1_PTPRF |
| 733 GATA3 | CDH1 | EGFR  | CDH1_EGFR  |
| 734 NFKB1 | CDH1 | CDH2  | CDH1_CDH2  |
| 735 NFKB1 | CDH1 | PTPRM | CDH1_PTPRM |
| 736 NFKB1 | CDH1 | ERBB3 | CDH1_ERBB3 |
| 737 NFKB1 | CDH1 | KLRG1 | CDH1_KLRG1 |
| 738 NFKB1 | CDH1 | PTPRF | CDH1_PTPRF |
| 739 NFKB1 | CDH1 | EGFR  | CDH1_EGFR  |
| 740 LCOR  | CDH1 | CDH2  | CDH1_CDH2  |
| 741 LCOR  | CDH1 | PTPRM | CDH1_PTPRM |
| 742 LCOR  | CDH1 | ERBB3 | CDH1_ERBB3 |
| 743 LCOR  | CDH1 | KLRG1 | CDH1_KLRG1 |
| 744 LCOR  | CDH1 | PTPRF | CDH1_PTPRF |
| 745 LCOR  | CDH1 | EGFR  | CDH1_EGFR  |
| 746 TCF3  | CDH1 | CDH2  | CDH1_CDH2  |
| 747 TCF3  | CDH1 | PTPRM | CDH1_PTPRM |
| 748 TCF3  | CDH1 | ERBB3 | CDH1_ERBB3 |
| 749 TCF3  | CDH1 | KLRG1 | CDH1_KLRG1 |
| 750 TCF3  | CDH1 | PTPRF | CDH1_PTPRF |
| 751 TCF3  | CDH1 | EGFR  | CDH1_EGFR  |
| 752 MTA1  | CDH1 | CDH2  | CDH1_CDH2  |
| 753 MTA1  | CDH1 | PTPRM | CDH1_PTPRM |

|            |      |       |            |
|------------|------|-------|------------|
| 754 MTA1   | CDH1 | ERBB3 | CDH1_ERBB3 |
| 755 MTA1   | CDH1 | KLRG1 | CDH1_KLRG1 |
| 756 MTA1   | CDH1 | PTPRF | CDH1_PTPRF |
| 757 MTA1   | CDH1 | EGFR  | CDH1_EGFR  |
| 758 HDGF   | CDH1 | CDH2  | CDH1_CDH2  |
| 759 HDGF   | CDH1 | PTPRM | CDH1_PTPRM |
| 760 HDGF   | CDH1 | ERBB3 | CDH1_ERBB3 |
| 761 HDGF   | CDH1 | KLRG1 | CDH1_KLRG1 |
| 762 HDGF   | CDH1 | PTPRF | CDH1_PTPRF |
| 763 HDGF   | CDH1 | EGFR  | CDH1_EGFR  |
| 764 AR     | CDH1 | CDH2  | CDH1_CDH2  |
| 765 AR     | CDH1 | PTPRM | CDH1_PTPRM |
| 766 AR     | CDH1 | ERBB3 | CDH1_ERBB3 |
| 767 AR     | CDH1 | KLRG1 | CDH1_KLRG1 |
| 768 AR     | CDH1 | PTPRF | CDH1_PTPRF |
| 769 AR     | CDH1 | EGFR  | CDH1_EGFR  |
| 770 ZNF217 | CDH1 | CDH2  | CDH1_CDH2  |
| 771 ZNF217 | CDH1 | PTPRM | CDH1_PTPRM |
| 772 ZNF217 | CDH1 | ERBB3 | CDH1_ERBB3 |
| 773 ZNF217 | CDH1 | KLRG1 | CDH1_KLRG1 |
| 774 ZNF217 | CDH1 | PTPRF | CDH1_PTPRF |
| 775 ZNF217 | CDH1 | EGFR  | CDH1_EGFR  |
| 776 STAT3  | CDH1 | CDH2  | CDH1_CDH2  |
| 777 STAT3  | CDH1 | PTPRM | CDH1_PTPRM |
| 778 STAT3  | CDH1 | ERBB3 | CDH1_ERBB3 |
| 779 STAT3  | CDH1 | KLRG1 | CDH1_KLRG1 |
| 780 STAT3  | CDH1 | PTPRF | CDH1_PTPRF |
| 781 STAT3  | CDH1 | EGFR  | CDH1_EGFR  |
| 782 SNAI1  | CDH1 | CDH2  | CDH1_CDH2  |
| 783 SNAI1  | CDH1 | PTPRM | CDH1_PTPRM |
| 784 SNAI1  | CDH1 | ERBB3 | CDH1_ERBB3 |
| 785 SNAI1  | CDH1 | KLRG1 | CDH1_KLRG1 |
| 786 SNAI1  | CDH1 | PTPRF | CDH1_PTPRF |
| 787 SNAI1  | CDH1 | EGFR  | CDH1_EGFR  |
| 788 RB1    | CDH1 | CDH2  | CDH1_CDH2  |
| 789 RB1    | CDH1 | PTPRM | CDH1_PTPRM |
| 790 RB1    | CDH1 | ERBB3 | CDH1_ERBB3 |
| 791 RB1    | CDH1 | KLRG1 | CDH1_KLRG1 |
| 792 RB1    | CDH1 | PTPRF | CDH1_PTPRF |
| 793 RB1    | CDH1 | EGFR  | CDH1_EGFR  |
| 794 LMO2   | CDH1 | CDH2  | CDH1_CDH2  |
| 795 LMO2   | CDH1 | PTPRM | CDH1_PTPRM |
| 796 LMO2   | CDH1 | ERBB3 | CDH1_ERBB3 |
| 797 LMO2   | CDH1 | KLRG1 | CDH1_KLRG1 |
| 798 LMO2   | CDH1 | PTPRF | CDH1_PTPRF |
| 799 LMO2   | CDH1 | EGFR  | CDH1_EGFR  |
| 800 HMGA2  | CDH1 | CDH2  | CDH1_CDH2  |
| 801 HMGA2  | CDH1 | PTPRM | CDH1_PTPRM |
| 802 HMGA2  | CDH1 | ERBB3 | CDH1_ERBB3 |
| 803 HMGA2  | CDH1 | KLRG1 | CDH1_KLRG1 |
| 804 HMGA2  | CDH1 | PTPRF | CDH1_PTPRF |
| 805 HMGA2  | CDH1 | EGFR  | CDH1_EGFR  |
| 806 FOXM1  | CDH1 | CDH2  | CDH1_CDH2  |
| 807 FOXM1  | CDH1 | PTPRM | CDH1_PTPRM |
| 808 FOXM1  | CDH1 | ERBB3 | CDH1_ERBB3 |
| 809 FOXM1  | CDH1 | KLRG1 | CDH1_KLRG1 |
| 810 FOXM1  | CDH1 | PTPRF | CDH1_PTPRF |
| 811 FOXM1  | CDH1 | EGFR  | CDH1_EGFR  |

|            |         |       |               |
|------------|---------|-------|---------------|
| 812 KLF4   | CDH1    | CDH2  | CDH1_CDH2     |
| 813 KLF4   | CDH1    | PTPRM | CDH1_PTPRM    |
| 814 KLF4   | CDH1    | ERBB3 | CDH1_ERBB3    |
| 815 KLF4   | CDH1    | KLRG1 | CDH1_KLRG1    |
| 816 KLF4   | CDH1    | PTPRF | CDH1_PTPRF    |
| 817 KLF4   | CDH1    | EGFR  | CDH1_EGFR     |
| 818 HDAC2  | CDH1    | CDH2  | CDH1_CDH2     |
| 819 HDAC2  | CDH1    | PTPRM | CDH1_PTPRM    |
| 820 HDAC2  | CDH1    | ERBB3 | CDH1_ERBB3    |
| 821 HDAC2  | CDH1    | KLRG1 | CDH1_KLRG1    |
| 822 HDAC2  | CDH1    | PTPRF | CDH1_PTPRF    |
| 823 HDAC2  | CDH1    | EGFR  | CDH1_EGFR     |
| 824 CBX7   | CDH1    | CDH2  | CDH1_CDH2     |
| 825 CBX7   | CDH1    | PTPRM | CDH1_PTPRM    |
| 826 CBX7   | CDH1    | ERBB3 | CDH1_ERBB3    |
| 827 CBX7   | CDH1    | KLRG1 | CDH1_KLRG1    |
| 828 CBX7   | CDH1    | PTPRF | CDH1_PTPRF    |
| 829 CBX7   | CDH1    | EGFR  | CDH1_EGFR     |
| 830 STAT5A | CEL     | CXCR4 | CEL_CXCR4     |
| 831 STAT5B | CEL     | CXCR4 | CEL_CXCR4     |
| 832 PTF1A  | CEL     | CXCR4 | CEL_CXCR4     |
| 833 SIRT1  | CFH     | ITGAM | CFH_ITGAM     |
| 834 SIRT1  | CFH     | SELL  | CFH_SELL      |
| 835 CEBPZ  | COL11A1 | ITGB1 | COL11A1_ITGB1 |
| 836 CEBPZ  | COL11A1 | DDR1  | COL11A1_DDR1  |
| 837 SP1    | COL18A1 | ITGB1 | COL18A1_ITGB1 |
| 838 FOXA2  | COL18A1 | ITGB1 | COL18A1_ITGB1 |
| 839 NFIC   | COL18A1 | ITGB1 | COL18A1_ITGB1 |
| 840 CIITA  | COL1A1  | CD36  | COL1A1_CD36   |
| 841 CIITA  | COL1A1  | ITGB1 | COL1A1_ITGB1  |
| 842 CIITA  | COL1A1  | CD44  | COL1A1_CD44   |
| 843 CIITA  | COL1A1  | DDR1  | COL1A1_DDR1   |
| 844 MYBL2  | COL1A1  | CD36  | COL1A1_CD36   |
| 845 MYBL2  | COL1A1  | ITGB1 | COL1A1_ITGB1  |
| 846 MYBL2  | COL1A1  | CD44  | COL1A1_CD44   |
| 847 MYBL2  | COL1A1  | DDR1  | COL1A1_DDR1   |
| 848 NFIC   | COL1A1  | CD36  | COL1A1_CD36   |
| 849 NFIC   | COL1A1  | ITGB1 | COL1A1_ITGB1  |
| 850 NFIC   | COL1A1  | CD44  | COL1A1_CD44   |
| 851 NFIC   | COL1A1  | DDR1  | COL1A1_DDR1   |
| 852 SP1    | COL1A1  | CD36  | COL1A1_CD36   |
| 853 SP1    | COL1A1  | ITGB1 | COL1A1_ITGB1  |
| 854 SP1    | COL1A1  | CD44  | COL1A1_CD44   |
| 855 SP1    | COL1A1  | DDR1  | COL1A1_DDR1   |
| 856 ETS1   | COL1A1  | CD36  | COL1A1_CD36   |
| 857 ETS1   | COL1A1  | ITGB1 | COL1A1_ITGB1  |
| 858 ETS1   | COL1A1  | CD44  | COL1A1_CD44   |
| 859 ETS1   | COL1A1  | DDR1  | COL1A1_DDR1   |
| 860 SP3    | COL1A1  | CD36  | COL1A1_CD36   |
| 861 SP3    | COL1A1  | ITGB1 | COL1A1_ITGB1  |
| 862 SP3    | COL1A1  | CD44  | COL1A1_CD44   |
| 863 SP3    | COL1A1  | DDR1  | COL1A1_DDR1   |
| 864 MYB    | COL1A1  | CD36  | COL1A1_CD36   |
| 865 MYB    | COL1A1  | ITGB1 | COL1A1_ITGB1  |
| 866 MYB    | COL1A1  | CD44  | COL1A1_CD44   |
| 867 MYB    | COL1A1  | DDR1  | COL1A1_DDR1   |
| 868 STAT6  | COL1A1  | CD36  | COL1A1_CD36   |
| 869 STAT6  | COL1A1  | ITGB1 | COL1A1_ITGB1  |

|     |        |        |       |              |
|-----|--------|--------|-------|--------------|
| 870 | STAT6  | COL1A1 | CD44  | COL1A1_CD44  |
| 871 | STAT6  | COL1A1 | DDR1  | COL1A1_DDR1  |
| 872 | TFAP2A | COL1A1 | CD36  | COL1A1_CD36  |
| 873 | TFAP2A | COL1A1 | ITGB1 | COL1A1_ITGB1 |
| 874 | TFAP2A | COL1A1 | CD44  | COL1A1_CD44  |
| 875 | TFAP2A | COL1A1 | DDR1  | COL1A1_DDR1  |
| 876 | MKL1   | COL1A1 | CD36  | COL1A1_CD36  |
| 877 | MKL1   | COL1A1 | ITGB1 | COL1A1_ITGB1 |
| 878 | MKL1   | COL1A1 | CD44  | COL1A1_CD44  |
| 879 | MKL1   | COL1A1 | DDR1  | COL1A1_DDR1  |
| 880 | NFKB1  | COL1A1 | CD36  | COL1A1_CD36  |
| 881 | NFKB1  | COL1A1 | ITGB1 | COL1A1_ITGB1 |
| 882 | NFKB1  | COL1A1 | CD44  | COL1A1_CD44  |
| 883 | NFKB1  | COL1A1 | DDR1  | COL1A1_DDR1  |
| 884 | RELA   | COL1A1 | CD36  | COL1A1_CD36  |
| 885 | RELA   | COL1A1 | ITGB1 | COL1A1_ITGB1 |
| 886 | RELA   | COL1A1 | CD44  | COL1A1_CD44  |
| 887 | RELA   | COL1A1 | DDR1  | COL1A1_DDR1  |
| 888 | NFKB1  | COL1A2 | CD36  | COL1A2_CD36  |
| 889 | NFKB1  | COL1A2 | CD44  | COL1A2_CD44  |
| 890 | NFKB1  | COL1A2 | ITGB1 | COL1A2_ITGB1 |
| 891 | CEBPZ  | COL1A2 | CD36  | COL1A2_CD36  |
| 892 | CEBPZ  | COL1A2 | CD44  | COL1A2_CD44  |
| 893 | CEBPZ  | COL1A2 | ITGB1 | COL1A2_ITGB1 |
| 894 | RFX5   | COL1A2 | CD36  | COL1A2_CD36  |
| 895 | RFX5   | COL1A2 | CD44  | COL1A2_CD44  |
| 896 | RFX5   | COL1A2 | ITGB1 | COL1A2_ITGB1 |
| 897 | HDAC2  | COL1A2 | CD36  | COL1A2_CD36  |
| 898 | HDAC2  | COL1A2 | CD44  | COL1A2_CD44  |
| 899 | HDAC2  | COL1A2 | ITGB1 | COL1A2_ITGB1 |
| 900 | HDAC1  | COL1A2 | CD36  | COL1A2_CD36  |
| 901 | HDAC1  | COL1A2 | CD44  | COL1A2_CD44  |
| 902 | HDAC1  | COL1A2 | ITGB1 | COL1A2_ITGB1 |
| 903 | CIITA  | COL1A2 | CD36  | COL1A2_CD36  |
| 904 | CIITA  | COL1A2 | CD44  | COL1A2_CD44  |
| 905 | CIITA  | COL1A2 | ITGB1 | COL1A2_ITGB1 |
| 906 | FLI1   | COL1A2 | CD36  | COL1A2_CD36  |
| 907 | FLI1   | COL1A2 | CD44  | COL1A2_CD44  |
| 908 | FLI1   | COL1A2 | ITGB1 | COL1A2_ITGB1 |
| 909 | RELA   | COL1A2 | CD36  | COL1A2_CD36  |
| 910 | RELA   | COL1A2 | CD44  | COL1A2_CD44  |
| 911 | RELA   | COL1A2 | ITGB1 | COL1A2_ITGB1 |
| 912 | RFX1   | COL1A2 | CD36  | COL1A2_CD36  |
| 913 | RFX1   | COL1A2 | CD44  | COL1A2_CD44  |
| 914 | RFX1   | COL1A2 | ITGB1 | COL1A2_ITGB1 |
| 915 | YY1    | COL1A2 | CD36  | COL1A2_CD36  |
| 916 | YY1    | COL1A2 | CD44  | COL1A2_CD44  |
| 917 | YY1    | COL1A2 | ITGB1 | COL1A2_ITGB1 |
| 918 | SIRT1  | COL1A2 | CD36  | COL1A2_CD36  |
| 919 | SIRT1  | COL1A2 | CD44  | COL1A2_CD44  |
| 920 | SIRT1  | COL1A2 | ITGB1 | COL1A2_ITGB1 |
| 921 | EP300  | COL1A2 | CD36  | COL1A2_CD36  |
| 922 | EP300  | COL1A2 | CD44  | COL1A2_CD44  |
| 923 | EP300  | COL1A2 | ITGB1 | COL1A2_ITGB1 |
| 924 | KLF11  | COL1A2 | CD36  | COL1A2_CD36  |
| 925 | KLF11  | COL1A2 | CD44  | COL1A2_CD44  |
| 926 | KLF11  | COL1A2 | ITGB1 | COL1A2_ITGB1 |
| 927 | STAT6  | COL1A2 | CD36  | COL1A2_CD36  |



|     |        |        |        |              |
|-----|--------|--------|--------|--------------|
| 928 | STAT6  | COL1A2 | CD44   | COL1A2_CD44  |
| 929 | STAT6  | COL1A2 | ITGB1  | COL1A2_ITGB1 |
| 930 | MYB    | COL1A2 | CD36   | COL1A2_CD36  |
| 931 | MYB    | COL1A2 | CD44   | COL1A2_CD44  |
| 932 | MYB    | COL1A2 | ITGB1  | COL1A2_ITGB1 |
| 933 | SOX9   | COL2A1 | ITGB1  | COL2A1_ITGB1 |
| 934 | SOX9   | COL2A1 | DDR1   | COL2A1_DDR1  |
| 935 | SP1    | COL2A1 | ITGB1  | COL2A1_ITGB1 |
| 936 | SP1    | COL2A1 | DDR1   | COL2A1_DDR1  |
| 937 | NFKB1  | COL2A1 | ITGB1  | COL2A1_ITGB1 |
| 938 | NFKB1  | COL2A1 | DDR1   | COL2A1_DDR1  |
| 939 | SP3    | COL2A1 | ITGB1  | COL2A1_ITGB1 |
| 940 | SP3    | COL2A1 | DDR1   | COL2A1_DDR1  |
| 941 | RELA   | COL2A1 | ITGB1  | COL2A1_ITGB1 |
| 942 | RELA   | COL2A1 | DDR1   | COL2A1_DDR1  |
| 943 | LMX1B  | COL4A1 | ITGB1  | COL4A1_ITGB1 |
| 944 | LMX1B  | COL4A1 | ITGB8  | COL4A1_ITGB8 |
| 945 | LMX1B  | COL4A1 | CD47   | COL4A1_CD47  |
| 946 | ZEB1   | COL4A3 | ITGB1  | COL4A3_ITGB1 |
| 947 | ZEB1   | COL4A3 | CD47   | COL4A3_CD47  |
| 948 | LMX1B  | COL4A4 | CD93   | COL4A4_CD93  |
| 949 | LMX1B  | COL4A4 | CD47   | COL4A4_CD47  |
| 950 | LMX1B  | COL4A4 | ITGAV  | COL4A4_ITGAV |
| 951 | LMX1B  | COL4A4 | ITGA2  | COL4A4_ITGA2 |
| 952 | LMX1B  | COL4A4 | ITGA1  | COL4A4_ITGA1 |
| 953 | LMX1B  | COL4A4 | ITGB1  | COL4A4_ITGB1 |
| 954 | SMAD3  | COL7A1 | ITGB1  | COL7A1_ITGB1 |
| 955 | NFKB1  | COL7A1 | ITGB1  | COL7A1_ITGB1 |
| 956 | SP1    | COL7A1 | ITGB1  | COL7A1_ITGB1 |
| 957 | SMAD4  | COL7A1 | ITGB1  | COL7A1_ITGB1 |
| 958 | RELA   | COL7A1 | ITGB1  | COL7A1_ITGB1 |
| 959 | STAT3  | CRP    | OLR1   | CRP_OLR1     |
| 960 | NFKB1  | CRP    | OLR1   | CRP_OLR1     |
| 961 | TBP    | CRP    | OLR1   | CRP_OLR1     |
| 962 | FOS    | CRP    | OLR1   | CRP_OLR1     |
| 963 | RELA   | CRP    | OLR1   | CRP_OLR1     |
| 964 | HNF1A  | CRP    | OLR1   | CRP_OLR1     |
| 965 | REL    | CRP    | OLR1   | CRP_OLR1     |
| 966 | CEBPB  | CRP    | OLR1   | CRP_OLR1     |
| 967 | CEBPA  | CSF1   | CSF1R  | CSF1_CSF1R   |
| 968 | ABL1   | CSF1   | CSF1R  | CSF1_CSF1R   |
| 969 | NFKB1  | CSF1   | CSF1R  | CSF1_CSF1R   |
| 970 | RUNX1  | CSF1   | CSF1R  | CSF1_CSF1R   |
| 971 | RELA   | CSF1   | CSF1R  | CSF1_CSF1R   |
| 972 | PPARG  | CSF1   | CSF1R  | CSF1_CSF1R   |
| 973 | SPI1   | CSF1   | CSF1R  | CSF1_CSF1R   |
| 974 | JUN    | CSF1   | CSF1R  | CSF1_CSF1R   |
| 975 | JUN    | CSF2   | CSF1R  | CSF2_CSF1R   |
| 976 | JUN    | CSF2   | CSF2RA | CSF2_CSF2RA  |
| 977 | JUN    | CSF2   | ITGB1  | CSF2_ITGB1   |
| 978 | JUN    | CSF2   | CSF3R  | CSF2_CSF3R   |
| 979 | CREBBP | CSF2   | CSF1R  | CSF2_CSF1R   |
| 980 | CREBBP | CSF2   | CSF2RA | CSF2_CSF2RA  |
| 981 | CREBBP | CSF2   | ITGB1  | CSF2_ITGB1   |
| 982 | CREBBP | CSF2   | CSF3R  | CSF2_CSF3R   |
| 983 | CTCF   | CSF2   | CSF1R  | CSF2_CSF1R   |
| 984 | CTCF   | CSF2   | CSF2RA | CSF2_CSF2RA  |
| 985 | CTCF   | CSF2   | ITGB1  | CSF2_ITGB1   |

|            |        |        |              |
|------------|--------|--------|--------------|
| 986 CTCF   | CSF2   | CSF3R  | CSF2_CSF3R   |
| 987 NFKB1  | CSF2   | CSF1R  | CSF2_CSF1R   |
| 988 NFKB1  | CSF2   | CSF2RA | CSF2_CSF2RA  |
| 989 NFKB1  | CSF2   | ITGB1  | CSF2_ITGB1   |
| 990 NFKB1  | CSF2   | CSF3R  | CSF2_CSF3R   |
| 991 ETS2   | CSF2   | CSF1R  | CSF2_CSF1R   |
| 992 ETS2   | CSF2   | CSF2RA | CSF2_CSF2RA  |
| 993 ETS2   | CSF2   | ITGB1  | CSF2_ITGB1   |
| 994 ETS2   | CSF2   | CSF3R  | CSF2_CSF3R   |
| 995 ETS1   | CSF2   | CSF1R  | CSF2_CSF1R   |
| 996 ETS1   | CSF2   | CSF2RA | CSF2_CSF2RA  |
| 997 ETS1   | CSF2   | ITGB1  | CSF2_ITGB1   |
| 998 ETS1   | CSF2   | CSF3R  | CSF2_CSF3R   |
| 999 RUNX1  | CSF2   | CSF1R  | CSF2_CSF1R   |
| 1000 RUNX1 | CSF2   | CSF2RA | CSF2_CSF2RA  |
| 1001 RUNX1 | CSF2   | ITGB1  | CSF2_ITGB1   |
| 1002 RUNX1 | CSF2   | CSF3R  | CSF2_CSF3R   |
| 1003 RELA  | CSF2   | CSF1R  | CSF2_CSF1R   |
| 1004 RELA  | CSF2   | CSF2RA | CSF2_CSF2RA  |
| 1005 RELA  | CSF2   | ITGB1  | CSF2_ITGB1   |
| 1006 RELA  | CSF2   | CSF3R  | CSF2_CSF3R   |
| 1007 HIF1A | CTGF   | ITGB2  | CTGF_ITGB2   |
| 1008 HIF1A | CTGF   | ITGAM  | CTGF_ITGAM   |
| 1009 HIF1A | CTGF   | LRP1   | CTGF_LRP1    |
| 1010 ETS1  | CTGF   | ITGB2  | CTGF_ITGB2   |
| 1011 ETS1  | CTGF   | ITGAM  | CTGF_ITGAM   |
| 1012 ETS1  | CTGF   | LRP1   | CTGF_LRP1    |
| 1013 FLI1  | CTGF   | ITGB2  | CTGF_ITGB2   |
| 1014 FLI1  | CTGF   | ITGAM  | CTGF_ITGAM   |
| 1015 FLI1  | CTGF   | LRP1   | CTGF_LRP1    |
| 1016 WT1   | CTGF   | ITGB2  | CTGF_ITGB2   |
| 1017 WT1   | CTGF   | ITGAM  | CTGF_ITGAM   |
| 1018 WT1   | CTGF   | LRP1   | CTGF_LRP1    |
| 1019 SP1   | CTGF   | ITGB2  | CTGF_ITGB2   |
| 1020 SP1   | CTGF   | ITGAM  | CTGF_ITGAM   |
| 1021 SP1   | CTGF   | LRP1   | CTGF_LRP1    |
| 1022 STAT3 | CTGF   | ITGB2  | CTGF_ITGB2   |
| 1023 STAT3 | CTGF   | ITGAM  | CTGF_ITGAM   |
| 1024 STAT3 | CTGF   | LRP1   | CTGF_LRP1    |
| 1025 JUN   | CTGF   | ITGB2  | CTGF_ITGB2   |
| 1026 JUN   | CTGF   | ITGAM  | CTGF_ITGAM   |
| 1027 JUN   | CTGF   | LRP1   | CTGF_LRP1    |
| 1028 STAT1 | CXCL10 | CXCR3  | CXCL10_CXCR3 |
| 1029 STAT1 | CXCL10 | SDC4   | CXCL10_SDC4  |
| 1030 RELA  | CXCL10 | CXCR3  | CXCL10_CXCR3 |
| 1031 RELA  | CXCL10 | SDC4   | CXCL10_SDC4  |
| 1032 NFKB1 | CXCL10 | CXCR3  | CXCL10_CXCR3 |
| 1033 NFKB1 | CXCL10 | SDC4   | CXCL10_SDC4  |
| 1034 IRF3  | CXCL10 | CXCR3  | CXCL10_CXCR3 |
| 1035 IRF3  | CXCL10 | SDC4   | CXCL10_SDC4  |
| 1036 IRF1  | CXCL10 | CXCR3  | CXCL10_CXCR3 |
| 1037 IRF1  | CXCL10 | SDC4   | CXCL10_SDC4  |
| 1038 IRF7  | CXCL10 | CXCR3  | CXCL10_CXCR3 |
| 1039 IRF7  | CXCL10 | SDC4   | CXCL10_SDC4  |
| 1040 RELA  | CXCL12 | CD4    | CXCL12_CD4   |
| 1041 RELA  | CXCL12 | ITGB1  | CXCL12_ITGB1 |
| 1042 RELA  | CXCL12 | CXCR4  | CXCL12_CXCR4 |
| 1043 RELA  | CXCL12 | SDC4   | CXCL12_SDC4  |

|      |        |                                 |       |               |
|------|--------|---------------------------------|-------|---------------|
| 1044 | RELA   | CXCL12                          | CXCR3 | CXCL12_CXCR3  |
| 1045 | NFKB1  | CXCL12                          | CD4   | CXCL12_CD4    |
| 1046 | NFKB1  | CXCL12                          | ITGB1 | CXCL12_ITGB1  |
| 1047 | NFKB1  | CXCL12                          | CXCR4 | CXCL12_CXCR4  |
| 1048 | NFKB1  | CXCL12                          | SDC4  | CXCL12_SDC4   |
| 1049 | NFKB1  | CXCL12                          | CXCR3 | CXCL12_CXCR3  |
| 1050 | HIF1A  | CXCL12                          | CD4   | CXCL12_CD4    |
| 1051 | HIF1A  | CXCL12                          | ITGB1 | CXCL12_ITGB1  |
| 1052 | HIF1A  | CXCL12                          | CXCR4 | CXCL12_CXCR4  |
| 1053 | HIF1A  | CXCL12                          | SDC4  | CXCL12_SDC4   |
| 1054 | HIF1A  | CXCL12                          | CXCR3 | CXCL12_CXCR3  |
| 1055 | SNAI2  | CXCL12                          | CD4   | CXCL12_CD4    |
| 1056 | SNAI2  | CXCL12                          | ITGB1 | CXCL12_ITGB1  |
| 1057 | SNAI2  | CXCL12                          | CXCR4 | CXCL12_CXCR4  |
| 1058 | SNAI2  | CXCL12                          | SDC4  | CXCL12_SDC4   |
| 1059 | SNAI2  | CXCL12                          | CXCR3 | CXCL12_CXCR3  |
| 1060 | ESR1   | CXCL12                          | CD4   | CXCL12_CD4    |
| 1061 | ESR1   | CXCL12                          | ITGB1 | CXCL12_ITGB1  |
| 1062 | ESR1   | CXCL12                          | CXCR4 | CXCL12_CXCR4  |
| 1063 | ESR1   | CXCL12                          | SDC4  | CXCL12_SDC4   |
| 1064 | ESR1   | CXCL12                          | CXCR3 | CXCL12_CXCR3  |
| 1065 | FOXF2  | CXCL12                          | CD4   | CXCL12_CD4    |
| 1066 | FOXF2  | CXCL12                          | ITGB1 | CXCL12_ITGB1  |
| 1067 | FOXF2  | CXCL12                          | CXCR4 | CXCL12_CXCR4  |
| 1068 | FOXF2  | CXCL12                          | SDC4  | CXCL12_SDC4   |
| 1069 | FOXF2  | CXCL12                          | CXCR3 | CXCL12_CXCR3  |
| 1070 | GLI1   | CYR61                           | ITGB2 | CYR61_ITGB2   |
| 1071 | GLI1   | CYR61                           | CAV1  | CYR61_CAV1    |
| 1072 | GLI1   | CYR61                           | ITGAM | CYR61_ITGAM   |
| 1073 | STAT3  | CYR61                           | ITGB2 | CYR61_ITGB2   |
| 1074 | STAT3  | CYR61                           | CAV1  | CYR61_CAV1    |
| 1075 | STAT3  | CYR61                           | ITGAM | CYR61_ITGAM   |
| 1076 | NR1H4  | DCN                             | MET   | DCN_MET       |
| 1077 | NR1H4  | DCN                             | EGFR  | DCN_EGFR      |
| 1078 | JUN    | DCN                             | MET   | DCN_MET       |
| 1079 | JUN    | DCN                             | EGFR  | DCN_EGFR      |
| 1080 | HDAC1  | DEFB1                           | CCR6  | DEFB1_CCR6    |
| 1081 | PPARG  | DEFB103A                        | CCR6  | DEFB103A_CCR6 |
| 1082 | NFKB1  | DEFB4A                          | CCR6  | DEFB4A_CCR6   |
| 1083 | NFKB1  | DEFB4A                          | TLR4  | DEFB4A_TLR4   |
| 1084 | NFKBIZ | DEFB4A                          | CCR6  | DEFB4A_CCR6   |
| 1085 | NFKBIZ | DEFB4A                          | TLR4  | DEFB4A_TLR4   |
| 1086 | RELA   | DEFB4A                          | CCR6  | DEFB4A_CCR6   |
| 1087 | RELA   | DEFB4A                          | TLR4  | DEFB4A_TLR4   |
| 1088 | SP1    | EGF                             | CAV1  | EGF_CAV1      |
| 1089 | SP1    | EGF                             | ERBB3 | EGF_ERBB3     |
| 1090 | SP1    | EGF                             | EGFR  | EGF_EGFR      |
| 1091 | KDM2A  | ERE <td>EGFR</td> <td>ERE</td>  | EGFR  | ERE           |
| 1092 | KDM2A  | ERE <td>ERBB2</td> <td>ERE</td> | ERBB2 | ERE           |
| 1093 | KDM2A  | ERE <td>ERBB3</td> <td>ERE</td> | ERBB3 | ERE           |
| 1094 | KDM2A  | ERE <td>ERBB4</td> <td>ERE</td> | ERBB4 | ERE           |
| 1095 | WT1    | ERE <td>EGFR</td> <td>ERE</td>  | EGFR  | ERE           |
| 1096 | WT1    | ERE <td>ERBB2</td> <td>ERE</td> | ERBB2 | ERE           |
| 1097 | WT1    | ERE <td>ERBB3</td> <td>ERE</td> | ERBB3 | ERE           |
| 1098 | WT1    | ERE <td>ERBB4</td> <td>ERE</td> | ERBB4 | ERE           |
| 1099 | NFIL3  | ERE <td>EGFR</td> <td>ERE</td>  | EGFR  | ERE           |
| 1100 | NFIL3  | ERE <td>ERBB2</td> <td>ERE</td> | ERBB2 | ERE           |
| 1101 | NFIL3  | ERE <td>ERBB3</td> <td>ERE</td> | ERBB3 | ERE           |

|             |       |          |                |
|-------------|-------|----------|----------------|
| 1102 NFIL3  | EREG  | ERBB4    | EREG_ERBB4     |
| 1103 SP1    | F10   | ITGB2    | F10_ITGB2      |
| 1104 SP1    | F10   | ITGAM    | F10_ITGAM      |
| 1105 GATA1  | F13A1 | ITGB1    | F13A1_ITGB1    |
| 1106 GATA1  | F13A1 | ITGA4    | F13A1_ITGA4    |
| 1107 ETS1   | F13A1 | ITGB1    | F13A1_ITGB1    |
| 1108 ETS1   | F13A1 | ITGA4    | F13A1_ITGA4    |
| 1109 RELA   | F8    | LRP1     | F8_LRP1        |
| 1110 CEBPB  | F8    | LRP1     | F8_LRP1        |
| 1111 APC    | F8    | LRP1     | F8_LRP1        |
| 1112 NFKB1  | F8    | LRP1     | F8_LRP1        |
| 1113 CEBPA  | F9    | LRP1     | F9_LRP1        |
| 1114 NR4A1  | FASLG | TNFRSF1A | FASLG_TNFRSF1A |
| 1115 NR4A1  | FASLG | FAS      | FASLG_FAS      |
| 1116 NR4A1  | FASLG | TNFRSF6B | FASLG_TNFRSF6B |
| 1117 EGR2   | FASLG | TNFRSF1A | FASLG_TNFRSF1A |
| 1118 EGR2   | FASLG | FAS      | FASLG_FAS      |
| 1119 EGR2   | FASLG | TNFRSF6B | FASLG_TNFRSF6B |
| 1120 CEBPB  | FASLG | TNFRSF1A | FASLG_TNFRSF1A |
| 1121 CEBPB  | FASLG | FAS      | FASLG_FAS      |
| 1122 CEBPB  | FASLG | TNFRSF6B | FASLG_TNFRSF6B |
| 1123 JUN    | FASLG | TNFRSF1A | FASLG_TNFRSF1A |
| 1124 JUN    | FASLG | FAS      | FASLG_FAS      |
| 1125 JUN    | FASLG | TNFRSF6B | FASLG_TNFRSF6B |
| 1126 PDCD11 | FASLG | TNFRSF1A | FASLG_TNFRSF1A |
| 1127 PDCD11 | FASLG | FAS      | FASLG_FAS      |
| 1128 PDCD11 | FASLG | TNFRSF6B | FASLG_TNFRSF6B |
| 1129 CREM   | FASLG | TNFRSF1A | FASLG_TNFRSF1A |
| 1130 CREM   | FASLG | FAS      | FASLG_FAS      |
| 1131 CREM   | FASLG | TNFRSF6B | FASLG_TNFRSF6B |
| 1132 SP1    | FASLG | TNFRSF1A | FASLG_TNFRSF1A |
| 1133 SP1    | FASLG | FAS      | FASLG_FAS      |
| 1134 SP1    | FASLG | TNFRSF6B | FASLG_TNFRSF6B |
| 1135 CIITA  | FASLG | TNFRSF1A | FASLG_TNFRSF1A |
| 1136 CIITA  | FASLG | FAS      | FASLG_FAS      |
| 1137 CIITA  | FASLG | TNFRSF6B | FASLG_TNFRSF6B |
| 1138 EGR1   | FASLG | TNFRSF1A | FASLG_TNFRSF1A |
| 1139 EGR1   | FASLG | FAS      | FASLG_FAS      |
| 1140 EGR1   | FASLG | TNFRSF6B | FASLG_TNFRSF6B |
| 1141 RELA   | FASLG | TNFRSF1A | FASLG_TNFRSF1A |
| 1142 RELA   | FASLG | FAS      | FASLG_FAS      |
| 1143 RELA   | FASLG | TNFRSF6B | FASLG_TNFRSF6B |
| 1144 NFKB1  | FASLG | TNFRSF1A | FASLG_TNFRSF1A |
| 1145 NFKB1  | FASLG | FAS      | FASLG_FAS      |
| 1146 NFKB1  | FASLG | TNFRSF6B | FASLG_TNFRSF6B |
| 1147 IRF1   | FASLG | TNFRSF1A | FASLG_TNFRSF1A |
| 1148 IRF1   | FASLG | FAS      | FASLG_FAS      |
| 1149 IRF1   | FASLG | TNFRSF6B | FASLG_TNFRSF6B |
| 1150 PPARG  | FASLG | TNFRSF1A | FASLG_TNFRSF1A |
| 1151 PPARG  | FASLG | FAS      | FASLG_FAS      |
| 1152 PPARG  | FASLG | TNFRSF6B | FASLG_TNFRSF6B |
| 1153 MAX    | FASLG | TNFRSF1A | FASLG_TNFRSF1A |
| 1154 MAX    | FASLG | FAS      | FASLG_FAS      |
| 1155 MAX    | FASLG | TNFRSF6B | FASLG_TNFRSF6B |
| 1156 ATF2   | FASLG | TNFRSF1A | FASLG_TNFRSF1A |
| 1157 ATF2   | FASLG | FAS      | FASLG_FAS      |
| 1158 ATF2   | FASLG | TNFRSF6B | FASLG_TNFRSF6B |
| 1159 MYC    | FASLG | TNFRSF1A | FASLG_TNFRSF1A |

|            |       |          |                |
|------------|-------|----------|----------------|
| 1160 MYC   | FASLG | FAS      | FASLG_FAS      |
| 1161 MYC   | FASLG | TNFRSF6B | FASLG_TNFRSF6B |
| 1162 FOXO3 | FASLG | TNFRSF1A | FASLG_TNFRSF1A |
| 1163 FOXO3 | FASLG | FAS      | FASLG_FAS      |
| 1164 FOXO3 | FASLG | TNFRSF6B | FASLG_TNFRSF6B |
| 1165 SP3   | FBLN1 | ITGB1    | FBLN1_ITGB1    |
| 1166 SP1   | FBLN1 | ITGB1    | FBLN1_ITGB1    |
| 1167 SP1   | FBN1  | ITGB1    | FBN1_ITGB1     |
| 1168 PARP1 | FBN1  | ITGB1    | FBN1_ITGB1     |
| 1169 TFCP2 | FGA   | ITGAM    | FGA_ITGAM      |
| 1170 TFCP2 | FGA   | PLAUR    | FGA_PLAUR      |
| 1171 TFCP2 | FGA   | ITGB2    | FGA_ITGB2      |
| 1172 TFCP2 | FGA   | ITGB1    | FGA_ITGB1      |
| 1173 TFCP2 | FGA   | ITGAX    | FGA_ITGAX      |
| 1174 FOXM1 | FGB   | ITGB2    | FGB_ITGB2      |
| 1175 FOXM1 | FGB   | ITGB1    | FGB_ITGB1      |
| 1176 FOXM1 | FGB   | ITGAM    | FGB_ITGAM      |
| 1177 RFX1  | FGF1  | EGFR     | FGF1_EGFR      |
| 1178 RFX1  | FGF1  | CD44     | FGF1_CD44      |
| 1179 RFX2  | FGF1  | EGFR     | FGF1_EGFR      |
| 1180 RFX2  | FGF1  | CD44     | FGF1_CD44      |
| 1181 STAT3 | FGF1  | EGFR     | FGF1_EGFR      |
| 1182 STAT3 | FGF1  | CD44     | FGF1_CD44      |
| 1183 PPARG | FGF1  | EGFR     | FGF1_EGFR      |
| 1184 PPARG | FGF1  | CD44     | FGF1_CD44      |
| 1185 RFX3  | FGF1  | EGFR     | FGF1_EGFR      |
| 1186 RFX3  | FGF1  | CD44     | FGF1_CD44      |
| 1187 STAT3 | FGF2  | CD44     | FGF2_CD44      |
| 1188 STAT3 | FGF2  | SDC4     | FGF2_SDC4      |
| 1189 STAT3 | FGF2  | SDC1     | FGF2_SDC1      |
| 1190 ERG   | FGF2  | CD44     | FGF2_CD44      |
| 1191 ERG   | FGF2  | SDC4     | FGF2_SDC4      |
| 1192 ERG   | FGF2  | SDC1     | FGF2_SDC1      |
| 1193 HOXB7 | FGF2  | CD44     | FGF2_CD44      |
| 1194 HOXB7 | FGF2  | SDC4     | FGF2_SDC4      |
| 1195 HOXB7 | FGF2  | SDC1     | FGF2_SDC1      |
| 1196 HIF1A | FGF2  | CD44     | FGF2_CD44      |
| 1197 HIF1A | FGF2  | SDC4     | FGF2_SDC4      |
| 1198 HIF1A | FGF2  | SDC1     | FGF2_SDC1      |
| 1199 EGR1  | FGF2  | CD44     | FGF2_CD44      |
| 1200 EGR1  | FGF2  | SDC4     | FGF2_SDC4      |
| 1201 EGR1  | FGF2  | SDC1     | FGF2_SDC1      |
| 1202 PTTG1 | FGF2  | CD44     | FGF2_CD44      |
| 1203 PTTG1 | FGF2  | SDC4     | FGF2_SDC4      |
| 1204 PTTG1 | FGF2  | SDC1     | FGF2_SDC1      |
| 1205 STAT1 | FGF2  | CD44     | FGF2_CD44      |
| 1206 STAT1 | FGF2  | SDC4     | FGF2_SDC4      |
| 1207 STAT1 | FGF2  | SDC1     | FGF2_SDC1      |
| 1208 TP53  | FGF2  | CD44     | FGF2_CD44      |
| 1209 TP53  | FGF2  | SDC4     | FGF2_SDC4      |
| 1210 TP53  | FGF2  | SDC1     | FGF2_SDC1      |
| 1211 HDAC5 | FGF2  | CD44     | FGF2_CD44      |
| 1212 HDAC5 | FGF2  | SDC4     | FGF2_SDC4      |
| 1213 HDAC5 | FGF2  | SDC1     | FGF2_SDC1      |
| 1214 LMO2  | FGF2  | CD44     | FGF2_CD44      |
| 1215 LMO2  | FGF2  | SDC4     | FGF2_SDC4      |
| 1216 LMO2  | FGF2  | SDC1     | FGF2_SDC1      |
| 1217 STAT3 | FGG   | ITGB1    | FGG_ITGB1      |

|      |       |      |           |               |
|------|-------|------|-----------|---------------|
| 1218 | STAT3 | FGG  | ITGB2     | FGG_ITGB2     |
| 1219 | STAT3 | FGL1 | EGFR      | FGL1_EGFR     |
| 1220 | RELA  | FN1  | CD79A     | FN1_CD79A     |
| 1221 | RELA  | FN1  | ITGAV     | FN1_ITGAV     |
| 1222 | RELA  | FN1  | TSHR      | FN1_TSHR      |
| 1223 | RELA  | FN1  | ITGA6     | FN1_ITGA6     |
| 1224 | RELA  | FN1  | COL13A1   | FN1_COL13A1   |
| 1225 | RELA  | FN1  | ITGA8     | FN1_ITGA8     |
| 1226 | RELA  | FN1  | ITGA5     | FN1_ITGA5     |
| 1227 | RELA  | FN1  | ITGA9     | FN1_ITGA9     |
| 1228 | RELA  | FN1  | CD44      | FN1_CD44      |
| 1229 | RELA  | FN1  | IL17RC    | FN1_IL17RC    |
| 1230 | RELA  | FN1  | ITGB6     | FN1_ITGB6     |
| 1231 | RELA  | FN1  | NT5E      | FN1_NT5E      |
| 1232 | RELA  | FN1  | C5AR1     | FN1_C5AR1     |
| 1233 | RELA  | FN1  | FLT4      | FN1_FLT4      |
| 1234 | RELA  | FN1  | ITGB3     | FN1_ITGB3     |
| 1235 | RELA  | FN1  | ROBO4     | FN1_ROBO4     |
| 1236 | RELA  | FN1  | PLAUR     | FN1_PLAUR     |
| 1237 | RELA  | FN1  | ITGA2B    | FN1_ITGA2B    |
| 1238 | RELA  | FN1  | ITGA3     | FN1_ITGA3     |
| 1239 | RELA  | FN1  | SDC2      | FN1_SDC2      |
| 1240 | RELA  | FN1  | ITGA4     | FN1_ITGA4     |
| 1241 | RELA  | FN1  | TNFRSF11B | FN1_TNFRSF11B |
| 1242 | RELA  | FN1  | ITGB8     | FN1_ITGB8     |
| 1243 | RELA  | FN1  | ITGB1     | FN1_ITGB1     |
| 1244 | RELA  | FN1  | ITGA2     | FN1_ITGA2     |
| 1245 | RELA  | FN1  | TMPRSS6   | FN1_TMPRSS6   |
| 1246 | RELA  | FN1  | MAG       | FN1_MAG       |
| 1247 | RELA  | FN1  | ITGB7     | FN1_ITGB7     |
| 1248 | EGR1  | FN1  | CD79A     | FN1_CD79A     |
| 1249 | EGR1  | FN1  | ITGAV     | FN1_ITGAV     |
| 1250 | EGR1  | FN1  | TSHR      | FN1_TSHR      |
| 1251 | EGR1  | FN1  | ITGA6     | FN1_ITGA6     |
| 1252 | EGR1  | FN1  | COL13A1   | FN1_COL13A1   |
| 1253 | EGR1  | FN1  | ITGA8     | FN1_ITGA8     |
| 1254 | EGR1  | FN1  | ITGA5     | FN1_ITGA5     |
| 1255 | EGR1  | FN1  | ITGA9     | FN1_ITGA9     |
| 1256 | EGR1  | FN1  | CD44      | FN1_CD44      |
| 1257 | EGR1  | FN1  | IL17RC    | FN1_IL17RC    |
| 1258 | EGR1  | FN1  | ITGB6     | FN1_ITGB6     |
| 1259 | EGR1  | FN1  | NT5E      | FN1_NT5E      |
| 1260 | EGR1  | FN1  | C5AR1     | FN1_C5AR1     |
| 1261 | EGR1  | FN1  | FLT4      | FN1_FLT4      |
| 1262 | EGR1  | FN1  | ITGB3     | FN1_ITGB3     |
| 1263 | EGR1  | FN1  | ROBO4     | FN1_ROBO4     |
| 1264 | EGR1  | FN1  | PLAUR     | FN1_PLAUR     |
| 1265 | EGR1  | FN1  | ITGA2B    | FN1_ITGA2B    |
| 1266 | EGR1  | FN1  | ITGA3     | FN1_ITGA3     |
| 1267 | EGR1  | FN1  | SDC2      | FN1_SDC2      |
| 1268 | EGR1  | FN1  | ITGA4     | FN1_ITGA4     |
| 1269 | EGR1  | FN1  | TNFRSF11B | FN1_TNFRSF11B |
| 1270 | EGR1  | FN1  | ITGB8     | FN1_ITGB8     |
| 1271 | EGR1  | FN1  | ITGB1     | FN1_ITGB1     |
| 1272 | EGR1  | FN1  | ITGA2     | FN1_ITGA2     |
| 1273 | EGR1  | FN1  | TMPRSS6   | FN1_TMPRSS6   |
| 1274 | EGR1  | FN1  | MAG       | FN1_MAG       |
| 1275 | EGR1  | FN1  | ITGB7     | FN1_ITGB7     |

|      |       |     |           |               |
|------|-------|-----|-----------|---------------|
| 1276 | NFKB1 | FN1 | CD79A     | FN1_CD79A     |
| 1277 | NFKB1 | FN1 | ITGAV     | FN1_ITGAV     |
| 1278 | NFKB1 | FN1 | TSHR      | FN1_TSHR      |
| 1279 | NFKB1 | FN1 | ITGA6     | FN1_ITGA6     |
| 1280 | NFKB1 | FN1 | COL13A1   | FN1_COL13A1   |
| 1281 | NFKB1 | FN1 | ITGA8     | FN1_ITGA8     |
| 1282 | NFKB1 | FN1 | ITGA5     | FN1_ITGA5     |
| 1283 | NFKB1 | FN1 | ITGA9     | FN1_ITGA9     |
| 1284 | NFKB1 | FN1 | CD44      | FN1_CD44      |
| 1285 | NFKB1 | FN1 | IL17RC    | FN1_IL17RC    |
| 1286 | NFKB1 | FN1 | ITGB6     | FN1_ITGB6     |
| 1287 | NFKB1 | FN1 | NT5E      | FN1_NT5E      |
| 1288 | NFKB1 | FN1 | C5AR1     | FN1_C5AR1     |
| 1289 | NFKB1 | FN1 | FLT4      | FN1_FLT4      |
| 1290 | NFKB1 | FN1 | ITGB3     | FN1_ITGB3     |
| 1291 | NFKB1 | FN1 | ROBO4     | FN1_ROBO4     |
| 1292 | NFKB1 | FN1 | PLAUR     | FN1_PLAUR     |
| 1293 | NFKB1 | FN1 | ITGA2B    | FN1_ITGA2B    |
| 1294 | NFKB1 | FN1 | ITGA3     | FN1_ITGA3     |
| 1295 | NFKB1 | FN1 | SDC2      | FN1_SDC2      |
| 1296 | NFKB1 | FN1 | ITGA4     | FN1_ITGA4     |
| 1297 | NFKB1 | FN1 | TNFRSF11B | FN1_TNFRSF11B |
| 1298 | NFKB1 | FN1 | ITGB8     | FN1_ITGB8     |
| 1299 | NFKB1 | FN1 | ITGB1     | FN1_ITGB1     |
| 1300 | NFKB1 | FN1 | ITGA2     | FN1_ITGA2     |
| 1301 | NFKB1 | FN1 | TMPRSS6   | FN1_TMPRSS6   |
| 1302 | NFKB1 | FN1 | MAG       | FN1_MAG       |
| 1303 | NFKB1 | FN1 | ITGB7     | FN1_ITGB7     |
| 1304 | PARP1 | FN1 | CD79A     | FN1_CD79A     |
| 1305 | PARP1 | FN1 | ITGAV     | FN1_ITGAV     |
| 1306 | PARP1 | FN1 | TSHR      | FN1_TSHR      |
| 1307 | PARP1 | FN1 | ITGA6     | FN1_ITGA6     |
| 1308 | PARP1 | FN1 | COL13A1   | FN1_COL13A1   |
| 1309 | PARP1 | FN1 | ITGA8     | FN1_ITGA8     |
| 1310 | PARP1 | FN1 | ITGA5     | FN1_ITGA5     |
| 1311 | PARP1 | FN1 | ITGA9     | FN1_ITGA9     |
| 1312 | PARP1 | FN1 | CD44      | FN1_CD44      |
| 1313 | PARP1 | FN1 | IL17RC    | FN1_IL17RC    |
| 1314 | PARP1 | FN1 | ITGB6     | FN1_ITGB6     |
| 1315 | PARP1 | FN1 | NT5E      | FN1_NT5E      |
| 1316 | PARP1 | FN1 | C5AR1     | FN1_C5AR1     |
| 1317 | PARP1 | FN1 | FLT4      | FN1_FLT4      |
| 1318 | PARP1 | FN1 | ITGB3     | FN1_ITGB3     |
| 1319 | PARP1 | FN1 | ROBO4     | FN1_ROBO4     |
| 1320 | PARP1 | FN1 | PLAUR     | FN1_PLAUR     |
| 1321 | PARP1 | FN1 | ITGA2B    | FN1_ITGA2B    |
| 1322 | PARP1 | FN1 | ITGA3     | FN1_ITGA3     |
| 1323 | PARP1 | FN1 | SDC2      | FN1_SDC2      |
| 1324 | PARP1 | FN1 | ITGA4     | FN1_ITGA4     |
| 1325 | PARP1 | FN1 | TNFRSF11B | FN1_TNFRSF11B |
| 1326 | PARP1 | FN1 | ITGB8     | FN1_ITGB8     |
| 1327 | PARP1 | FN1 | ITGB1     | FN1_ITGB1     |
| 1328 | PARP1 | FN1 | ITGA2     | FN1_ITGA2     |
| 1329 | PARP1 | FN1 | TMPRSS6   | FN1_TMPRSS6   |
| 1330 | PARP1 | FN1 | MAG       | FN1_MAG       |
| 1331 | PARP1 | FN1 | ITGB7     | FN1_ITGB7     |
| 1332 | CEBPA | FN1 | CD79A     | FN1_CD79A     |
| 1333 | CEBPA | FN1 | ITGAV     | FN1_ITGAV     |

|            |     |           |               |
|------------|-----|-----------|---------------|
| 1334 CEBPA | FN1 | TSHR      | FN1_TSHR      |
| 1335 CEBPA | FN1 | ITGA6     | FN1_ITGA6     |
| 1336 CEBPA | FN1 | COL13A1   | FN1_COL13A1   |
| 1337 CEBPA | FN1 | ITGA8     | FN1_ITGA8     |
| 1338 CEBPA | FN1 | ITGA5     | FN1_ITGA5     |
| 1339 CEBPA | FN1 | ITGA9     | FN1_ITGA9     |
| 1340 CEBPA | FN1 | CD44      | FN1_CD44      |
| 1341 CEBPA | FN1 | IL17RC    | FN1_IL17RC    |
| 1342 CEBPA | FN1 | ITGB6     | FN1_ITGB6     |
| 1343 CEBPA | FN1 | NT5E      | FN1_NT5E      |
| 1344 CEBPA | FN1 | C5AR1     | FN1_C5AR1     |
| 1345 CEBPA | FN1 | FLT4      | FN1_FLT4      |
| 1346 CEBPA | FN1 | ITGB3     | FN1_ITGB3     |
| 1347 CEBPA | FN1 | ROBO4     | FN1_ROBO4     |
| 1348 CEBPA | FN1 | PLAUR     | FN1_PLAUR     |
| 1349 CEBPA | FN1 | ITGA2B    | FN1_ITGA2B    |
| 1350 CEBPA | FN1 | ITGA3     | FN1_ITGA3     |
| 1351 CEBPA | FN1 | SDC2      | FN1_SDC2      |
| 1352 CEBPA | FN1 | ITGA4     | FN1_ITGA4     |
| 1353 CEBPA | FN1 | TNFRSF11B | FN1_TNFRSF11B |
| 1354 CEBPA | FN1 | ITGB8     | FN1_ITGB8     |
| 1355 CEBPA | FN1 | ITGB1     | FN1_ITGB1     |
| 1356 CEBPA | FN1 | ITGA2     | FN1_ITGA2     |
| 1357 CEBPA | FN1 | TMPRSS6   | FN1_TMPRSS6   |
| 1358 CEBPA | FN1 | MAG       | FN1_MAG       |
| 1359 CEBPA | FN1 | ITGB7     | FN1_ITGB7     |
| 1360 SOX17 | FN1 | CD79A     | FN1_CD79A     |
| 1361 SOX17 | FN1 | ITGAV     | FN1_ITGAV     |
| 1362 SOX17 | FN1 | TSHR      | FN1_TSHR      |
| 1363 SOX17 | FN1 | ITGA6     | FN1_ITGA6     |
| 1364 SOX17 | FN1 | COL13A1   | FN1_COL13A1   |
| 1365 SOX17 | FN1 | ITGA8     | FN1_ITGA8     |
| 1366 SOX17 | FN1 | ITGA5     | FN1_ITGA5     |
| 1367 SOX17 | FN1 | ITGA9     | FN1_ITGA9     |
| 1368 SOX17 | FN1 | CD44      | FN1_CD44      |
| 1369 SOX17 | FN1 | IL17RC    | FN1_IL17RC    |
| 1370 SOX17 | FN1 | ITGB6     | FN1_ITGB6     |
| 1371 SOX17 | FN1 | NT5E      | FN1_NT5E      |
| 1372 SOX17 | FN1 | C5AR1     | FN1_C5AR1     |
| 1373 SOX17 | FN1 | FLT4      | FN1_FLT4      |
| 1374 SOX17 | FN1 | ITGB3     | FN1_ITGB3     |
| 1375 SOX17 | FN1 | ROBO4     | FN1_ROBO4     |
| 1376 SOX17 | FN1 | PLAUR     | FN1_PLAUR     |
| 1377 SOX17 | FN1 | ITGA2B    | FN1_ITGA2B    |
| 1378 SOX17 | FN1 | ITGA3     | FN1_ITGA3     |
| 1379 SOX17 | FN1 | SDC2      | FN1_SDC2      |
| 1380 SOX17 | FN1 | ITGA4     | FN1_ITGA4     |
| 1381 SOX17 | FN1 | TNFRSF11B | FN1_TNFRSF11B |
| 1382 SOX17 | FN1 | ITGB8     | FN1_ITGB8     |
| 1383 SOX17 | FN1 | ITGB1     | FN1_ITGB1     |
| 1384 SOX17 | FN1 | ITGA2     | FN1_ITGA2     |
| 1385 SOX17 | FN1 | TMPRSS6   | FN1_TMPRSS6   |
| 1386 SOX17 | FN1 | MAG       | FN1_MAG       |
| 1387 SOX17 | FN1 | ITGB7     | FN1_ITGB7     |
| 1388 ATF2  | FN1 | CD79A     | FN1_CD79A     |
| 1389 ATF2  | FN1 | ITGAV     | FN1_ITGAV     |
| 1390 ATF2  | FN1 | TSHR      | FN1_TSHR      |
| 1391 ATF2  | FN1 | ITGA6     | FN1_ITGA6     |



|      |        |     |           |               |
|------|--------|-----|-----------|---------------|
| 1392 | ATF2   | FN1 | COL13A1   | FN1_COL13A1   |
| 1393 | ATF2   | FN1 | ITGA8     | FN1_ITGA8     |
| 1394 | ATF2   | FN1 | ITGA5     | FN1_ITGA5     |
| 1395 | ATF2   | FN1 | ITGA9     | FN1_ITGA9     |
| 1396 | ATF2   | FN1 | CD44      | FN1_CD44      |
| 1397 | ATF2   | FN1 | IL17RC    | FN1_IL17RC    |
| 1398 | ATF2   | FN1 | ITGB6     | FN1_ITGB6     |
| 1399 | ATF2   | FN1 | NT5E      | FN1_NT5E      |
| 1400 | ATF2   | FN1 | C5AR1     | FN1_C5AR1     |
| 1401 | ATF2   | FN1 | FLT4      | FN1_FLT4      |
| 1402 | ATF2   | FN1 | ITGB3     | FN1_ITGB3     |
| 1403 | ATF2   | FN1 | ROBO4     | FN1_ROBO4     |
| 1404 | ATF2   | FN1 | PLAUR     | FN1_PLAUR     |
| 1405 | ATF2   | FN1 | ITGA2B    | FN1_ITGA2B    |
| 1406 | ATF2   | FN1 | ITGA3     | FN1_ITGA3     |
| 1407 | ATF2   | FN1 | SDC2      | FN1_SDC2      |
| 1408 | ATF2   | FN1 | ITGA4     | FN1_ITGA4     |
| 1409 | ATF2   | FN1 | TNFRSF11B | FN1_TNFRSF11B |
| 1410 | ATF2   | FN1 | ITGB8     | FN1_ITGB8     |
| 1411 | ATF2   | FN1 | ITGB1     | FN1_ITGB1     |
| 1412 | ATF2   | FN1 | ITGA2     | FN1_ITGA2     |
| 1413 | ATF2   | FN1 | TMPRSS6   | FN1_TMPRSS6   |
| 1414 | ATF2   | FN1 | MAG       | FN1_MAG       |
| 1415 | ATF2   | FN1 | ITGB7     | FN1_ITGB7     |
| 1416 | TWIST1 | FN1 | CD79A     | FN1_CD79A     |
| 1417 | TWIST1 | FN1 | ITGAV     | FN1_ITGAV     |
| 1418 | TWIST1 | FN1 | TSHR      | FN1_TSHR      |
| 1419 | TWIST1 | FN1 | ITGA6     | FN1_ITGA6     |
| 1420 | TWIST1 | FN1 | COL13A1   | FN1_COL13A1   |
| 1421 | TWIST1 | FN1 | ITGA8     | FN1_ITGA8     |
| 1422 | TWIST1 | FN1 | ITGA5     | FN1_ITGA5     |
| 1423 | TWIST1 | FN1 | ITGA9     | FN1_ITGA9     |
| 1424 | TWIST1 | FN1 | CD44      | FN1_CD44      |
| 1425 | TWIST1 | FN1 | IL17RC    | FN1_IL17RC    |
| 1426 | TWIST1 | FN1 | ITGB6     | FN1_ITGB6     |
| 1427 | TWIST1 | FN1 | NT5E      | FN1_NT5E      |
| 1428 | TWIST1 | FN1 | C5AR1     | FN1_C5AR1     |
| 1429 | TWIST1 | FN1 | FLT4      | FN1_FLT4      |
| 1430 | TWIST1 | FN1 | ITGB3     | FN1_ITGB3     |
| 1431 | TWIST1 | FN1 | ROBO4     | FN1_ROBO4     |
| 1432 | TWIST1 | FN1 | PLAUR     | FN1_PLAUR     |
| 1433 | TWIST1 | FN1 | ITGA2B    | FN1_ITGA2B    |
| 1434 | TWIST1 | FN1 | ITGA3     | FN1_ITGA3     |
| 1435 | TWIST1 | FN1 | SDC2      | FN1_SDC2      |
| 1436 | TWIST1 | FN1 | ITGA4     | FN1_ITGA4     |
| 1437 | TWIST1 | FN1 | TNFRSF11B | FN1_TNFRSF11B |
| 1438 | TWIST1 | FN1 | ITGB8     | FN1_ITGB8     |
| 1439 | TWIST1 | FN1 | ITGB1     | FN1_ITGB1     |
| 1440 | TWIST1 | FN1 | ITGA2     | FN1_ITGA2     |
| 1441 | TWIST1 | FN1 | TMPRSS6   | FN1_TMPRSS6   |
| 1442 | TWIST1 | FN1 | MAG       | FN1_MAG       |
| 1443 | TWIST1 | FN1 | ITGB7     | FN1_ITGB7     |
| 1444 | TWIST2 | FN1 | CD79A     | FN1_CD79A     |
| 1445 | TWIST2 | FN1 | ITGAV     | FN1_ITGAV     |
| 1446 | TWIST2 | FN1 | TSHR      | FN1_TSHR      |
| 1447 | TWIST2 | FN1 | ITGA6     | FN1_ITGA6     |
| 1448 | TWIST2 | FN1 | COL13A1   | FN1_COL13A1   |
| 1449 | TWIST2 | FN1 | ITGA8     | FN1_ITGA8     |

|             |     |           |               |
|-------------|-----|-----------|---------------|
| 1450 TWIST2 | FN1 | ITGA5     | FN1_ITGA5     |
| 1451 TWIST2 | FN1 | ITGA9     | FN1_ITGA9     |
| 1452 TWIST2 | FN1 | CD44      | FN1_CD44      |
| 1453 TWIST2 | FN1 | IL17RC    | FN1_IL17RC    |
| 1454 TWIST2 | FN1 | ITGB6     | FN1_ITGB6     |
| 1455 TWIST2 | FN1 | NT5E      | FN1_NT5E      |
| 1456 TWIST2 | FN1 | C5AR1     | FN1_C5AR1     |
| 1457 TWIST2 | FN1 | FLT4      | FN1_FLT4      |
| 1458 TWIST2 | FN1 | ITGB3     | FN1_ITGB3     |
| 1459 TWIST2 | FN1 | ROBO4     | FN1_ROBO4     |
| 1460 TWIST2 | FN1 | PLAUR     | FN1_PLAUR     |
| 1461 TWIST2 | FN1 | ITGA2B    | FN1_ITGA2B    |
| 1462 TWIST2 | FN1 | ITGA3     | FN1_ITGA3     |
| 1463 TWIST2 | FN1 | SDC2      | FN1_SDC2      |
| 1464 TWIST2 | FN1 | ITGA4     | FN1_ITGA4     |
| 1465 TWIST2 | FN1 | TNFRSF11B | FN1_TNFRSF11B |
| 1466 TWIST2 | FN1 | ITGB8     | FN1_ITGB8     |
| 1467 TWIST2 | FN1 | ITGB1     | FN1_ITGB1     |
| 1468 TWIST2 | FN1 | ITGA2     | FN1_ITGA2     |
| 1469 TWIST2 | FN1 | TMPRSS6   | FN1_TMPRSS6   |
| 1470 TWIST2 | FN1 | MAG       | FN1_MAG       |
| 1471 TWIST2 | FN1 | ITGB7     | FN1_ITGB7     |
| 1472 KLF8   | FN1 | CD79A     | FN1_CD79A     |
| 1473 KLF8   | FN1 | ITGAV     | FN1_ITGAV     |
| 1474 KLF8   | FN1 | TSHR      | FN1_TSHR      |
| 1475 KLF8   | FN1 | ITGA6     | FN1_ITGA6     |
| 1476 KLF8   | FN1 | COL13A1   | FN1_COL13A1   |
| 1477 KLF8   | FN1 | ITGA8     | FN1_ITGA8     |
| 1478 KLF8   | FN1 | ITGA5     | FN1_ITGA5     |
| 1479 KLF8   | FN1 | ITGA9     | FN1_ITGA9     |
| 1480 KLF8   | FN1 | CD44      | FN1_CD44      |
| 1481 KLF8   | FN1 | IL17RC    | FN1_IL17RC    |
| 1482 KLF8   | FN1 | ITGB6     | FN1_ITGB6     |
| 1483 KLF8   | FN1 | NT5E      | FN1_NT5E      |
| 1484 KLF8   | FN1 | C5AR1     | FN1_C5AR1     |
| 1485 KLF8   | FN1 | FLT4      | FN1_FLT4      |
| 1486 KLF8   | FN1 | ITGB3     | FN1_ITGB3     |
| 1487 KLF8   | FN1 | ROBO4     | FN1_ROBO4     |
| 1488 KLF8   | FN1 | PLAUR     | FN1_PLAUR     |
| 1489 KLF8   | FN1 | ITGA2B    | FN1_ITGA2B    |
| 1490 KLF8   | FN1 | ITGA3     | FN1_ITGA3     |
| 1491 KLF8   | FN1 | SDC2      | FN1_SDC2      |
| 1492 KLF8   | FN1 | ITGA4     | FN1_ITGA4     |
| 1493 KLF8   | FN1 | TNFRSF11B | FN1_TNFRSF11B |
| 1494 KLF8   | FN1 | ITGB8     | FN1_ITGB8     |
| 1495 KLF8   | FN1 | ITGB1     | FN1_ITGB1     |
| 1496 KLF8   | FN1 | ITGA2     | FN1_ITGA2     |
| 1497 KLF8   | FN1 | TMPRSS6   | FN1_TMPRSS6   |
| 1498 KLF8   | FN1 | MAG       | FN1_MAG       |
| 1499 KLF8   | FN1 | ITGB7     | FN1_ITGB7     |
| 1500 AR     | FN1 | CD79A     | FN1_CD79A     |
| 1501 AR     | FN1 | ITGAV     | FN1_ITGAV     |
| 1502 AR     | FN1 | TSHR      | FN1_TSHR      |
| 1503 AR     | FN1 | ITGA6     | FN1_ITGA6     |
| 1504 AR     | FN1 | COL13A1   | FN1_COL13A1   |
| 1505 AR     | FN1 | ITGA8     | FN1_ITGA8     |
| 1506 AR     | FN1 | ITGA5     | FN1_ITGA5     |
| 1507 AR     | FN1 | ITGA9     | FN1_ITGA9     |

|            |      |           |               |
|------------|------|-----------|---------------|
| 1508 AR    | FN1  | CD44      | FN1_CD44      |
| 1509 AR    | FN1  | IL17RC    | FN1_IL17RC    |
| 1510 AR    | FN1  | ITGB6     | FN1_ITGB6     |
| 1511 AR    | FN1  | NT5E      | FN1_NT5E      |
| 1512 AR    | FN1  | C5AR1     | FN1_C5AR1     |
| 1513 AR    | FN1  | FLT4      | FN1_FLT4      |
| 1514 AR    | FN1  | ITGB3     | FN1_ITGB3     |
| 1515 AR    | FN1  | ROBO4     | FN1_ROBO4     |
| 1516 AR    | FN1  | PLAUR     | FN1_PLAUR     |
| 1517 AR    | FN1  | ITGA2B    | FN1_ITGA2B    |
| 1518 AR    | FN1  | ITGA3     | FN1_ITGA3     |
| 1519 AR    | FN1  | SDC2      | FN1_SDC2      |
| 1520 AR    | FN1  | ITGA4     | FN1_ITGA4     |
| 1521 AR    | FN1  | TNFRSF11B | FN1_TNFRSF11B |
| 1522 AR    | FN1  | ITGB8     | FN1_ITGB8     |
| 1523 AR    | FN1  | ITGB1     | FN1_ITGB1     |
| 1524 AR    | FN1  | ITGA2     | FN1_ITGA2     |
| 1525 AR    | FN1  | TMPRSS6   | FN1_TMPRSS6   |
| 1526 AR    | FN1  | MAG       | FN1_MAG       |
| 1527 AR    | FN1  | ITGB7     | FN1_ITGB7     |
| 1528 SNAI1 | FN1  | CD79A     | FN1_CD79A     |
| 1529 SNAI1 | FN1  | ITGAV     | FN1_ITGAV     |
| 1530 SNAI1 | FN1  | TSHR      | FN1_TSHR      |
| 1531 SNAI1 | FN1  | ITGA6     | FN1_ITGA6     |
| 1532 SNAI1 | FN1  | COL13A1   | FN1_COL13A1   |
| 1533 SNAI1 | FN1  | ITGA8     | FN1_ITGA8     |
| 1534 SNAI1 | FN1  | ITGA5     | FN1_ITGA5     |
| 1535 SNAI1 | FN1  | ITGA9     | FN1_ITGA9     |
| 1536 SNAI1 | FN1  | CD44      | FN1_CD44      |
| 1537 SNAI1 | FN1  | IL17RC    | FN1_IL17RC    |
| 1538 SNAI1 | FN1  | ITGB6     | FN1_ITGB6     |
| 1539 SNAI1 | FN1  | NT5E      | FN1_NT5E      |
| 1540 SNAI1 | FN1  | C5AR1     | FN1_C5AR1     |
| 1541 SNAI1 | FN1  | FLT4      | FN1_FLT4      |
| 1542 SNAI1 | FN1  | ITGB3     | FN1_ITGB3     |
| 1543 SNAI1 | FN1  | ROBO4     | FN1_ROBO4     |
| 1544 SNAI1 | FN1  | PLAUR     | FN1_PLAUR     |
| 1545 SNAI1 | FN1  | ITGA2B    | FN1_ITGA2B    |
| 1546 SNAI1 | FN1  | ITGA3     | FN1_ITGA3     |
| 1547 SNAI1 | FN1  | SDC2      | FN1_SDC2      |
| 1548 SNAI1 | FN1  | ITGA4     | FN1_ITGA4     |
| 1549 SNAI1 | FN1  | TNFRSF11B | FN1_TNFRSF11B |
| 1550 SNAI1 | FN1  | ITGB8     | FN1_ITGB8     |
| 1551 SNAI1 | FN1  | ITGB1     | FN1_ITGB1     |
| 1552 SNAI1 | FN1  | ITGA2     | FN1_ITGA2     |
| 1553 SNAI1 | FN1  | TMPRSS6   | FN1_TMPRSS6   |
| 1554 SNAI1 | FN1  | MAG       | FN1_MAG       |
| 1555 SNAI1 | FN1  | ITGB7     | FN1_ITGB7     |
| 1556 GATA1 | GNAS | LHCGR     | GNAS_LHCGR    |
| 1557 GATA1 | GNAS | GCCR      | GNAS_GCCR     |
| 1558 GATA1 | GNAS | ADORA1    | GNAS_ADORA1   |
| 1559 GATA1 | GNAS | ADCY9     | GNAS_ADCY9    |
| 1560 GATA1 | GNAS | PTGDR     | GNAS_PTGDR    |
| 1561 GATA1 | GNAS | GLP1R     | GNAS_GLP1R    |
| 1562 GATA1 | GNAS | ADRB3     | GNAS_ADRB3    |
| 1563 GATA1 | GNAS | ADCY8     | GNAS_ADCY8    |
| 1564 GATA1 | GNAS | HTR6      | GNAS_HTR6     |
| 1565 GATA1 | GNAS | CRHR1     | GNAS_CRHR1    |

|            |       |        |             |
|------------|-------|--------|-------------|
| 1566 GATA1 | GNAS  | AVPR2  | GNAS_AVPR2  |
| 1567 GATA1 | GNAS  | ADCY1  | GNAS_ADCY1  |
| 1568 GATA1 | GNAS  | ADCY7  | GNAS_ADCY7  |
| 1569 GATA1 | GNAS  | VIPR1  | GNAS_VIPR1  |
| 1570 GATA1 | GNAS  | PTGIR  | GNAS_PTGIR  |
| 1571 GATA1 | GNAS  | TSHR   | GNAS_TSHR   |
| 1572 YY1   | GNAS  | LHCGR  | GNAS_LHCGR  |
| 1573 YY1   | GNAS  | GCGR   | GNAS_GCGR   |
| 1574 YY1   | GNAS  | ADORA1 | GNAS_ADORA1 |
| 1575 YY1   | GNAS  | ADCY9  | GNAS_ADCY9  |
| 1576 YY1   | GNAS  | PTGDR  | GNAS_PTGDR  |
| 1577 YY1   | GNAS  | GLP1R  | GNAS_GLP1R  |
| 1578 YY1   | GNAS  | ADRB3  | GNAS_ADRB3  |
| 1579 YY1   | GNAS  | ADCY8  | GNAS_ADCY8  |
| 1580 YY1   | GNAS  | HTR6   | GNAS_HTR6   |
| 1581 YY1   | GNAS  | CRHR1  | GNAS_CRHR1  |
| 1582 YY1   | GNAS  | AVPR2  | GNAS_AVPR2  |
| 1583 YY1   | GNAS  | ADCY1  | GNAS_ADCY1  |
| 1584 YY1   | GNAS  | ADCY7  | GNAS_ADCY7  |
| 1585 YY1   | GNAS  | VIPR1  | GNAS_VIPR1  |
| 1586 YY1   | GNAS  | PTGIR  | GNAS_PTGIR  |
| 1587 YY1   | GNAS  | TSHR   | GNAS_TSHR   |
| 1588 NFKB1 | GSTP1 | TRAF2  | GSTP1_TRAF2 |
| 1589 JUN   | GSTP1 | TRAF2  | GSTP1_TRAF2 |
| 1590 SP1   | GSTP1 | TRAF2  | GSTP1_TRAF2 |
| 1591 TP53  | GSTP1 | TRAF2  | GSTP1_TRAF2 |
| 1592 CDX2  | GSTP1 | TRAF2  | GSTP1_TRAF2 |
| 1593 MBD2  | GSTP1 | TRAF2  | GSTP1_TRAF2 |
| 1594 FOS   | GSTP1 | TRAF2  | GSTP1_TRAF2 |
| 1595 RELA  | GSTP1 | TRAF2  | GSTP1_TRAF2 |
| 1596 CEBPZ | GZMB  | IGF2R  | GZMB_IGF2R  |
| 1597 CEBPZ | GZMB  | PGRMC1 | GZMB_PGRMC1 |
| 1598 CEBPZ | GZMB  | CHRM3  | GZMB_CHRM3  |
| 1599 SP1   | HAS2  | CD44   | HAS2_CD44   |
| 1600 SP1   | HAS2  | HMMR   | HAS2_HMMR   |
| 1601 YY1   | HAS2  | CD44   | HAS2_CD44   |
| 1602 YY1   | HAS2  | HMMR   | HAS2_HMMR   |
| 1603 SP1   | HBEGF | PRLR   | HBEGF_PRLR  |
| 1604 SP1   | HBEGF | ERBB2  | HBEGF_ERBB2 |
| 1605 SP1   | HBEGF | EGFR   | HBEGF_EGFR  |
| 1606 SP1   | HBEGF | CD82   | HBEGF_CD82  |
| 1607 SP1   | HBEGF | CD44   | HBEGF_CD44  |
| 1608 SP1   | HBEGF | CD9    | HBEGF_CD9   |
| 1609 SP1   | HBEGF | ERBB4  | HBEGF_ERBB4 |
| 1610 SP3   | HBEGF | PRLR   | HBEGF_PRLR  |
| 1611 SP3   | HBEGF | ERBB2  | HBEGF_ERBB2 |
| 1612 SP3   | HBEGF | EGFR   | HBEGF_EGFR  |
| 1613 SP3   | HBEGF | CD82   | HBEGF_CD82  |
| 1614 SP3   | HBEGF | CD44   | HBEGF_CD44  |
| 1615 SP3   | HBEGF | CD9    | HBEGF_CD9   |
| 1616 SP3   | HBEGF | ERBB4  | HBEGF_ERBB4 |
| 1617 WT1   | HBEGF | PRLR   | HBEGF_PRLR  |
| 1618 WT1   | HBEGF | ERBB2  | HBEGF_ERBB2 |
| 1619 WT1   | HBEGF | EGFR   | HBEGF_EGFR  |
| 1620 WT1   | HBEGF | CD82   | HBEGF_CD82  |
| 1621 WT1   | HBEGF | CD44   | HBEGF_CD44  |
| 1622 WT1   | HBEGF | CD9    | HBEGF_CD9   |
| 1623 WT1   | HBEGF | ERBB4  | HBEGF_ERBB4 |

|      |        |       |       |             |
|------|--------|-------|-------|-------------|
| 1624 | HIF1A  | HBEGF | PRLR  | HBEGF_PRLR  |
| 1625 | HIF1A  | HBEGF | ERBB2 | HBEGF_ERBB2 |
| 1626 | HIF1A  | HBEGF | EGFR  | HBEGF_EGFR  |
| 1627 | HIF1A  | HBEGF | CD82  | HBEGF_CD82  |
| 1628 | HIF1A  | HBEGF | CD44  | HBEGF_CD44  |
| 1629 | HIF1A  | HBEGF | CD9   | HBEGF_CD9   |
| 1630 | HIF1A  | HBEGF | ERBB4 | HBEGF_ERBB4 |
| 1631 | NFKB1  | HBEGF | PRLR  | HBEGF_PRLR  |
| 1632 | NFKB1  | HBEGF | ERBB2 | HBEGF_ERBB2 |
| 1633 | NFKB1  | HBEGF | EGFR  | HBEGF_EGFR  |
| 1634 | NFKB1  | HBEGF | CD82  | HBEGF_CD82  |
| 1635 | NFKB1  | HBEGF | CD44  | HBEGF_CD44  |
| 1636 | NFKB1  | HBEGF | CD9   | HBEGF_CD9   |
| 1637 | NFKB1  | HBEGF | ERBB4 | HBEGF_ERBB4 |
| 1638 | SNAI1  | HBEGF | PRLR  | HBEGF_PRLR  |
| 1639 | SNAI1  | HBEGF | ERBB2 | HBEGF_ERBB2 |
| 1640 | SNAI1  | HBEGF | EGFR  | HBEGF_EGFR  |
| 1641 | SNAI1  | HBEGF | CD82  | HBEGF_CD82  |
| 1642 | SNAI1  | HBEGF | CD44  | HBEGF_CD44  |
| 1643 | SNAI1  | HBEGF | CD9   | HBEGF_CD9   |
| 1644 | SNAI1  | HBEGF | ERBB4 | HBEGF_ERBB4 |
| 1645 | MYOD1  | HBEGF | PRLR  | HBEGF_PRLR  |
| 1646 | MYOD1  | HBEGF | ERBB2 | HBEGF_ERBB2 |
| 1647 | MYOD1  | HBEGF | EGFR  | HBEGF_EGFR  |
| 1648 | MYOD1  | HBEGF | CD82  | HBEGF_CD82  |
| 1649 | MYOD1  | HBEGF | CD44  | HBEGF_CD44  |
| 1650 | MYOD1  | HBEGF | CD9   | HBEGF_CD9   |
| 1651 | MYOD1  | HBEGF | ERBB4 | HBEGF_ERBB4 |
| 1652 | RELA   | HBEGF | PRLR  | HBEGF_PRLR  |
| 1653 | RELA   | HBEGF | ERBB2 | HBEGF_ERBB2 |
| 1654 | RELA   | HBEGF | EGFR  | HBEGF_EGFR  |
| 1655 | RELA   | HBEGF | CD82  | HBEGF_CD82  |
| 1656 | RELA   | HBEGF | CD44  | HBEGF_CD44  |
| 1657 | RELA   | HBEGF | CD9   | HBEGF_CD9   |
| 1658 | RELA   | HBEGF | ERBB4 | HBEGF_ERBB4 |
| 1659 | KAT5   | HDC   | HRH1  | HDC_HRH1    |
| 1660 | KAT5   | HDC   | HRH4  | HDC_HRH4    |
| 1661 | KAT5   | HDC   | HRH2  | HDC_HRH2    |
| 1662 | KAT5   | HDC   | HRH3  | HDC_HRH3    |
| 1663 | KLF4   | HDC   | HRH1  | HDC_HRH1    |
| 1664 | KLF4   | HDC   | HRH4  | HDC_HRH4    |
| 1665 | KLF4   | HDC   | HRH2  | HDC_HRH2    |
| 1666 | KLF4   | HDC   | HRH3  | HDC_HRH3    |
| 1667 | HDAC7  | HDC   | HRH1  | HDC_HRH1    |
| 1668 | HDAC7  | HDC   | HRH4  | HDC_HRH4    |
| 1669 | HDAC7  | HDC   | HRH2  | HDC_HRH2    |
| 1670 | HDAC7  | HDC   | HRH3  | HDC_HRH3    |
| 1671 | TFAP2A | HGF   | ST14  | HGF_ST14    |
| 1672 | TFAP2A | HGF   | SDC1  | HGF_SDC1    |
| 1673 | TFAP2A | HGF   | MET   | HGF_MET     |
| 1674 | TFAP2A | HGF   | CD44  | HGF_CD44    |
| 1675 | SP1    | HGF   | ST14  | HGF_ST14    |
| 1676 | SP1    | HGF   | SDC1  | HGF_SDC1    |
| 1677 | SP1    | HGF   | MET   | HGF_MET     |
| 1678 | SP1    | HGF   | CD44  | HGF_CD44    |
| 1679 | NFIC   | HGF   | ST14  | HGF_ST14    |
| 1680 | NFIC   | HGF   | SDC1  | HGF_SDC1    |
| 1681 | NFIC   | HGF   | MET   | HGF_MET     |

|             |       |         |               |
|-------------|-------|---------|---------------|
| 1682 NFIC   | HGF   | CD44    | HGF_CD44      |
| 1683 SP3    | HGF   | ST14    | HGF_ST14      |
| 1684 SP3    | HGF   | SDC1    | HGF_SDC1      |
| 1685 SP3    | HGF   | MET     | HGF_MET       |
| 1686 SP3    | HGF   | CD44    | HGF_CD44      |
| 1687 STAT3  | HGF   | ST14    | HGF_ST14      |
| 1688 STAT3  | HGF   | SDC1    | HGF_SDC1      |
| 1689 STAT3  | HGF   | MET     | HGF_MET       |
| 1690 STAT3  | HGF   | CD44    | HGF_CD44      |
| 1691 HIVEP2 | HLA-A | LILRB2  | HLA-A_LILRB2  |
| 1692 HIVEP2 | HLA-A | APLP2   | HLA-A_APLP2   |
| 1693 HIVEP2 | HLA-A | KIR2DL3 | HLA-A_KIR2DL3 |
| 1694 HIVEP2 | HLA-A | CD3D    | HLA-A_CD3D    |
| 1695 HIVEP2 | HLA-A | KIR3DL1 | HLA-A_KIR3DL1 |
| 1696 HIVEP2 | HLA-A | CD3G    | HLA-A_CD3G    |
| 1697 HIVEP2 | HLA-A | KIR3DL2 | HLA-A_KIR3DL2 |
| 1698 HIVEP2 | HLA-A | LILRB1  | HLA-A_LILRB1  |
| 1699 HIVEP2 | HLA-A | KIR2DL1 | HLA-A_KIR2DL1 |
| 1700 HIVEP2 | HLA-A | ERBB2   | HLA-A_ERBB2   |
| 1701 CIITA  | HLA-A | LILRB2  | HLA-A_LILRB2  |
| 1702 CIITA  | HLA-A | APLP2   | HLA-A_APLP2   |
| 1703 CIITA  | HLA-A | KIR2DL3 | HLA-A_KIR2DL3 |
| 1704 CIITA  | HLA-A | CD3D    | HLA-A_CD3D    |
| 1705 CIITA  | HLA-A | KIR3DL1 | HLA-A_KIR3DL1 |
| 1706 CIITA  | HLA-A | CD3G    | HLA-A_CD3G    |
| 1707 CIITA  | HLA-A | KIR3DL2 | HLA-A_KIR3DL2 |
| 1708 CIITA  | HLA-A | LILRB1  | HLA-A_LILRB1  |
| 1709 CIITA  | HLA-A | KIR2DL1 | HLA-A_KIR2DL1 |
| 1710 CIITA  | HLA-A | ERBB2   | HLA-A_ERBB2   |
| 1711 RELA   | HLA-A | LILRB2  | HLA-A_LILRB2  |
| 1712 RELA   | HLA-A | APLP2   | HLA-A_APLP2   |
| 1713 RELA   | HLA-A | KIR2DL3 | HLA-A_KIR2DL3 |
| 1714 RELA   | HLA-A | CD3D    | HLA-A_CD3D    |
| 1715 RELA   | HLA-A | KIR3DL1 | HLA-A_KIR3DL1 |
| 1716 RELA   | HLA-A | CD3G    | HLA-A_CD3G    |
| 1717 RELA   | HLA-A | KIR3DL2 | HLA-A_KIR3DL2 |
| 1718 RELA   | HLA-A | LILRB1  | HLA-A_LILRB1  |
| 1719 RELA   | HLA-A | KIR2DL1 | HLA-A_KIR2DL1 |
| 1720 RELA   | HLA-A | ERBB2   | HLA-A_ERBB2   |
| 1721 MYCN   | HLA-A | LILRB2  | HLA-A_LILRB2  |
| 1722 MYCN   | HLA-A | APLP2   | HLA-A_APLP2   |
| 1723 MYCN   | HLA-A | KIR2DL3 | HLA-A_KIR2DL3 |
| 1724 MYCN   | HLA-A | CD3D    | HLA-A_CD3D    |
| 1725 MYCN   | HLA-A | KIR3DL1 | HLA-A_KIR3DL1 |
| 1726 MYCN   | HLA-A | CD3G    | HLA-A_CD3G    |
| 1727 MYCN   | HLA-A | KIR3DL2 | HLA-A_KIR3DL2 |
| 1728 MYCN   | HLA-A | LILRB1  | HLA-A_LILRB1  |
| 1729 MYCN   | HLA-A | KIR2DL1 | HLA-A_KIR2DL1 |
| 1730 MYCN   | HLA-A | ERBB2   | HLA-A_ERBB2   |
| 1731 MYC    | HLA-A | LILRB2  | HLA-A_LILRB2  |
| 1732 MYC    | HLA-A | APLP2   | HLA-A_APLP2   |
| 1733 MYC    | HLA-A | KIR2DL3 | HLA-A_KIR2DL3 |
| 1734 MYC    | HLA-A | CD3D    | HLA-A_CD3D    |
| 1735 MYC    | HLA-A | KIR3DL1 | HLA-A_KIR3DL1 |
| 1736 MYC    | HLA-A | CD3G    | HLA-A_CD3G    |
| 1737 MYC    | HLA-A | KIR3DL2 | HLA-A_KIR3DL2 |
| 1738 MYC    | HLA-A | LILRB1  | HLA-A_LILRB1  |
| 1739 MYC    | HLA-A | KIR2DL1 | HLA-A_KIR2DL1 |

|             |       |         |               |
|-------------|-------|---------|---------------|
| 1740 MYC    | HLA-A | ERBB2   | HLA-A_ERBB2   |
| 1741 IRF1   | HLA-A | LILRB2  | HLA-A_LILRB2  |
| 1742 IRF1   | HLA-A | APLP2   | HLA-A_APLP2   |
| 1743 IRF1   | HLA-A | KIR2DL3 | HLA-A_KIR2DL3 |
| 1744 IRF1   | HLA-A | CD3D    | HLA-A_CD3D    |
| 1745 IRF1   | HLA-A | KIR3DL1 | HLA-A_KIR3DL1 |
| 1746 IRF1   | HLA-A | CD3G    | HLA-A_CD3G    |
| 1747 IRF1   | HLA-A | KIR3DL2 | HLA-A_KIR3DL2 |
| 1748 IRF1   | HLA-A | LILRB1  | HLA-A_LILRB1  |
| 1749 IRF1   | HLA-A | KIR2DL1 | HLA-A_KIR2DL1 |
| 1750 IRF1   | HLA-A | ERBB2   | HLA-A_ERBB2   |
| 1751 HIVEP2 | HLA-B | CANX    | HLA-B_CANX    |
| 1752 HIVEP2 | HLA-B | KIR2DL3 | HLA-B_KIR2DL3 |
| 1753 HIVEP2 | HLA-B | CD3D    | HLA-B_CD3D    |
| 1754 HIVEP2 | HLA-B | CD3G    | HLA-B_CD3G    |
| 1755 HIVEP2 | HLA-B | KIR3DL1 | HLA-B_KIR3DL1 |
| 1756 HIVEP2 | HLA-B | KLRD1   | HLA-B_KLRD1   |
| 1757 HIVEP2 | HLA-B | LILRB2  | HLA-B_LILRB2  |
| 1758 HIVEP2 | HLA-B | LILRB1  | HLA-B_LILRB1  |
| 1759 MYC    | HLA-B | CANX    | HLA-B_CANX    |
| 1760 MYC    | HLA-B | KIR2DL3 | HLA-B_KIR2DL3 |
| 1761 MYC    | HLA-B | CD3D    | HLA-B_CD3D    |
| 1762 MYC    | HLA-B | CD3G    | HLA-B_CD3G    |
| 1763 MYC    | HLA-B | KIR3DL1 | HLA-B_KIR3DL1 |
| 1764 MYC    | HLA-B | KLRD1   | HLA-B_KLRD1   |
| 1765 MYC    | HLA-B | LILRB2  | HLA-B_LILRB2  |
| 1766 MYC    | HLA-B | LILRB1  | HLA-B_LILRB1  |
| 1767 MYCN   | HLA-B | CANX    | HLA-B_CANX    |
| 1768 MYCN   | HLA-B | KIR2DL3 | HLA-B_KIR2DL3 |
| 1769 MYCN   | HLA-B | CD3D    | HLA-B_CD3D    |
| 1770 MYCN   | HLA-B | CD3G    | HLA-B_CD3G    |
| 1771 MYCN   | HLA-B | KIR3DL1 | HLA-B_KIR3DL1 |
| 1772 MYCN   | HLA-B | KLRD1   | HLA-B_KLRD1   |
| 1773 MYCN   | HLA-B | LILRB2  | HLA-B_LILRB2  |
| 1774 MYCN   | HLA-B | LILRB1  | HLA-B_LILRB1  |
| 1775 CIITA  | HLA-B | CANX    | HLA-B_CANX    |
| 1776 CIITA  | HLA-B | KIR2DL3 | HLA-B_KIR2DL3 |
| 1777 CIITA  | HLA-B | CD3D    | HLA-B_CD3D    |
| 1778 CIITA  | HLA-B | CD3G    | HLA-B_CD3G    |
| 1779 CIITA  | HLA-B | KIR3DL1 | HLA-B_KIR3DL1 |
| 1780 CIITA  | HLA-B | KLRD1   | HLA-B_KLRD1   |
| 1781 CIITA  | HLA-B | LILRB2  | HLA-B_LILRB2  |
| 1782 CIITA  | HLA-B | LILRB1  | HLA-B_LILRB1  |
| 1783 CIITA  | HLA-C | KIR2DL1 | HLA-C_KIR2DL1 |
| 1784 CIITA  | HLA-C | KIR2DS4 | HLA-C_KIR2DS4 |
| 1785 CIITA  | HLA-C | DDR1    | HLA-C_DDR1    |
| 1786 CIITA  | HLA-C | KIR2DL3 | HLA-C_KIR2DL3 |
| 1787 CIITA  | HLA-C | LILRB2  | HLA-C_LILRB2  |
| 1788 CIITA  | HLA-C | KIR3DL1 | HLA-C_KIR3DL1 |
| 1789 CIITA  | HLA-C | CD3G    | HLA-C_CD3G    |
| 1790 CIITA  | HLA-C | SLC9C2  | HLA-C_SLC9C2  |
| 1791 CIITA  | HLA-C | LILRB1  | HLA-C_LILRB1  |
| 1792 CIITA  | HLA-C | LILRA3  | HLA-C_LILRA3  |
| 1793 CIITA  | HLA-C | CD3D    | HLA-C_CD3D    |
| 1794 CIITA  | HLA-C | NOTCH4  | HLA-C_NOTCH4  |
| 1795 HIVEP2 | HLA-C | KIR2DL1 | HLA-C_KIR2DL1 |
| 1796 HIVEP2 | HLA-C | KIR2DS4 | HLA-C_KIR2DS4 |
| 1797 HIVEP2 | HLA-C | DDR1    | HLA-C_DDR1    |

|             |       |         |               |
|-------------|-------|---------|---------------|
| 1798 HIVEP2 | HLA-C | KIR2DL3 | HLA-C_KIR2DL3 |
| 1799 HIVEP2 | HLA-C | LILRB2  | HLA-C_LILRB2  |
| 1800 HIVEP2 | HLA-C | KIR3DL1 | HLA-C_KIR3DL1 |
| 1801 HIVEP2 | HLA-C | CD3G    | HLA-C_CD3G    |
| 1802 HIVEP2 | HLA-C | SLC9C2  | HLA-C_SLC9C2  |
| 1803 HIVEP2 | HLA-C | LILRB1  | HLA-C_LILRB1  |
| 1804 HIVEP2 | HLA-C | LILRA3  | HLA-C_LILRA3  |
| 1805 HIVEP2 | HLA-C | CD3D    | HLA-C_CD3D    |
| 1806 HIVEP2 | HLA-C | NOTCH4  | HLA-C_NOTCH4  |
| 1807 MYC    | HLA-C | KIR2DL1 | HLA-C_KIR2DL1 |
| 1808 MYC    | HLA-C | KIR2DS4 | HLA-C_KIR2DS4 |
| 1809 MYC    | HLA-C | DDR1    | HLA-C_DDR1    |
| 1810 MYC    | HLA-C | KIR2DL3 | HLA-C_KIR2DL3 |
| 1811 MYC    | HLA-C | LILRB2  | HLA-C_LILRB2  |
| 1812 MYC    | HLA-C | KIR3DL1 | HLA-C_KIR3DL1 |
| 1813 MYC    | HLA-C | CD3G    | HLA-C_CD3G    |
| 1814 MYC    | HLA-C | SLC9C2  | HLA-C_SLC9C2  |
| 1815 MYC    | HLA-C | LILRB1  | HLA-C_LILRB1  |
| 1816 MYC    | HLA-C | LILRA3  | HLA-C_LILRA3  |
| 1817 MYC    | HLA-C | CD3D    | HLA-C_CD3D    |
| 1818 MYC    | HLA-C | NOTCH4  | HLA-C_NOTCH4  |
| 1819 MYCN   | HLA-C | KIR2DL1 | HLA-C_KIR2DL1 |
| 1820 MYCN   | HLA-C | KIR2DS4 | HLA-C_KIR2DS4 |
| 1821 MYCN   | HLA-C | DDR1    | HLA-C_DDR1    |
| 1822 MYCN   | HLA-C | KIR2DL3 | HLA-C_KIR2DL3 |
| 1823 MYCN   | HLA-C | LILRB2  | HLA-C_LILRB2  |
| 1824 MYCN   | HLA-C | KIR3DL1 | HLA-C_KIR3DL1 |
| 1825 MYCN   | HLA-C | CD3G    | HLA-C_CD3G    |
| 1826 MYCN   | HLA-C | SLC9C2  | HLA-C_SLC9C2  |
| 1827 MYCN   | HLA-C | LILRB1  | HLA-C_LILRB1  |
| 1828 MYCN   | HLA-C | LILRA3  | HLA-C_LILRA3  |
| 1829 MYCN   | HLA-C | CD3D    | HLA-C_CD3D    |
| 1830 MYCN   | HLA-C | NOTCH4  | HLA-C_NOTCH4  |
| 1831 HIVEP2 | HLA-E | KLRC1   | HLA-E_KLRC1   |
| 1832 HIVEP2 | HLA-E | KIR3DL1 | HLA-E_KIR3DL1 |
| 1833 HIVEP2 | HLA-E | KLRC2   | HLA-E_KLRC2   |
| 1834 HIVEP2 | HLA-E | KLRD1   | HLA-E_KLRD1   |
| 1835 HIVEP2 | HLA-E | SLC16A4 | HLA-E_SLC16A4 |
| 1836 MYCN   | HLA-E | KLRC1   | HLA-E_KLRC1   |
| 1837 MYCN   | HLA-E | KIR3DL1 | HLA-E_KIR3DL1 |
| 1838 MYCN   | HLA-E | KLRC2   | HLA-E_KLRC2   |
| 1839 MYCN   | HLA-E | KLRD1   | HLA-E_KLRD1   |
| 1840 MYCN   | HLA-E | SLC16A4 | HLA-E_SLC16A4 |
| 1841 MYC    | HLA-E | KLRC1   | HLA-E_KLRC1   |
| 1842 MYC    | HLA-E | KIR3DL1 | HLA-E_KIR3DL1 |
| 1843 MYC    | HLA-E | KLRC2   | HLA-E_KLRC2   |
| 1844 MYC    | HLA-E | KLRD1   | HLA-E_KLRD1   |
| 1845 MYC    | HLA-E | SLC16A4 | HLA-E_SLC16A4 |
| 1846 STAT1  | HLA-E | KLRC1   | HLA-E_KLRC1   |
| 1847 STAT1  | HLA-E | KIR3DL1 | HLA-E_KIR3DL1 |
| 1848 STAT1  | HLA-E | KLRC2   | HLA-E_KLRC2   |
| 1849 STAT1  | HLA-E | KLRD1   | HLA-E_KLRD1   |
| 1850 STAT1  | HLA-E | SLC16A4 | HLA-E_SLC16A4 |
| 1851 MYCN   | HLA-G | LILRB1  | HLA-G_LILRB1  |
| 1852 MYCN   | HLA-G | KLRD1   | HLA-G_KLRD1   |
| 1853 MYCN   | HLA-G | LILRB2  | HLA-G_LILRB2  |
| 1854 MYCN   | HLA-G | CD4     | HLA-G_CD4     |
| 1855 HSF1   | HLA-G | LILRB1  | HLA-G_LILRB1  |



|      |        |          |        |                |
|------|--------|----------|--------|----------------|
| 1856 | HSF1   | HLA-G    | KLRD1  | HLA-G_KLRD1    |
| 1857 | HSF1   | HLA-G    | LILRB2 | HLA-G_LILRB2   |
| 1858 | HSF1   | HLA-G    | CD4    | HLA-G_CD4      |
| 1859 | IRF1   | HLA-G    | LILRB1 | HLA-G_LILRB1   |
| 1860 | IRF1   | HLA-G    | KLRD1  | HLA-G_KLRD1    |
| 1861 | IRF1   | HLA-G    | LILRB2 | HLA-G_LILRB2   |
| 1862 | IRF1   | HLA-G    | CD4    | HLA-G_CD4      |
| 1863 | CIITA  | HLA-G    | LILRB1 | HLA-G_LILRB1   |
| 1864 | CIITA  | HLA-G    | KLRD1  | HLA-G_KLRD1    |
| 1865 | CIITA  | HLA-G    | LILRB2 | HLA-G_LILRB2   |
| 1866 | CIITA  | HLA-G    | CD4    | HLA-G_CD4      |
| 1867 | MYC    | HLA-G    | LILRB1 | HLA-G_LILRB1   |
| 1868 | MYC    | HLA-G    | KLRD1  | HLA-G_KLRD1    |
| 1869 | MYC    | HLA-G    | LILRB2 | HLA-G_LILRB2   |
| 1870 | MYC    | HLA-G    | CD4    | HLA-G_CD4      |
| 1871 | GLI3   | HLA-G    | LILRB1 | HLA-G_LILRB1   |
| 1872 | GLI3   | HLA-G    | KLRD1  | HLA-G_KLRD1    |
| 1873 | GLI3   | HLA-G    | LILRB2 | HLA-G_LILRB2   |
| 1874 | GLI3   | HLA-G    | CD4    | HLA-G_CD4      |
| 1875 | SP1    | HLA-G    | LILRB1 | HLA-G_LILRB1   |
| 1876 | SP1    | HLA-G    | KLRD1  | HLA-G_KLRD1    |
| 1877 | SP1    | HLA-G    | LILRB2 | HLA-G_LILRB2   |
| 1878 | SP1    | HLA-G    | CD4    | HLA-G_CD4      |
| 1879 | HIVEP2 | HLA-G    | LILRB1 | HLA-G_LILRB1   |
| 1880 | HIVEP2 | HLA-G    | KLRD1  | HLA-G_KLRD1    |
| 1881 | HIVEP2 | HLA-G    | LILRB2 | HLA-G_LILRB2   |
| 1882 | HIVEP2 | HLA-G    | CD4    | HLA-G_CD4      |
| 1883 | NFIC   | HMGB1    | THBD   | HMGB1_THBD     |
| 1884 | NFIC   | HMGB1    | SDC1   | HMGB1_SDC1     |
| 1885 | NR1I2  | HP       | ASGR1  | HP_ASGR1       |
| 1886 | NR1I2  | HP       | ITGB2  | HP_ITGB2       |
| 1887 | NR1I2  | HP       | ITGAM  | HP_ITGAM       |
| 1888 | NR1I2  | HP       | ASGR2  | HP_ASGR2       |
| 1889 | CEBPB  | HP       | ASGR1  | HP_ASGR1       |
| 1890 | CEBPB  | HP       | ITGB2  | HP_ITGB2       |
| 1891 | CEBPB  | HP       | ITGAM  | HP_ITGAM       |
| 1892 | CEBPB  | HP       | ASGR2  | HP_ASGR2       |
| 1893 | STAT3  | HP       | ASGR1  | HP_ASGR1       |
| 1894 | STAT3  | HP       | ITGB2  | HP_ITGB2       |
| 1895 | STAT3  | HP       | ITGAM  | HP_ITGAM       |
| 1896 | STAT3  | HP       | ASGR2  | HP_ASGR2       |
| 1897 | SMAD4  | HP       | ASGR1  | HP_ASGR1       |
| 1898 | SMAD4  | HP       | ITGB2  | HP_ITGB2       |
| 1899 | SMAD4  | HP       | ITGAM  | HP_ITGAM       |
| 1900 | SMAD4  | HP       | ASGR2  | HP_ASGR2       |
| 1901 | BTG2   | HRAS     | CAV1   | HRAS_CAV1      |
| 1902 | BTG2   | HRAS     | TLR2   | HRAS_TLR2      |
| 1903 | BTG2   | HRAS     | INSR   | HRAS_INSR      |
| 1904 | TP53   | HRAS     | CAV1   | HRAS_CAV1      |
| 1905 | TP53   | HRAS     | TLR2   | HRAS_TLR2      |
| 1906 | TP53   | HRAS     | INSR   | HRAS_INSR      |
| 1907 | MAZ    | HRAS     | CAV1   | HRAS_CAV1      |
| 1908 | MAZ    | HRAS     | TLR2   | HRAS_TLR2      |
| 1909 | MAZ    | HRAS     | INSR   | HRAS_INSR      |
| 1910 | SP1    | HRAS     | CAV1   | HRAS_CAV1      |
| 1911 | SP1    | HRAS     | TLR2   | HRAS_TLR2      |
| 1912 | SP1    | HRAS     | INSR   | HRAS_INSR      |
| 1913 | POU4F1 | HSP90AA1 | FGFR3  | HSP90AA1_FGFR3 |

|      |        |          |        |                |
|------|--------|----------|--------|----------------|
| 1914 | POU4F1 | HSP90AA1 | CFTR   | HSP90AA1_CFTR  |
| 1915 | POU4F1 | HSP90AA1 | EGFR   | HSP90AA1_EGFR  |
| 1916 | POU4F2 | HSP90AA1 | FGFR3  | HSP90AA1_FGFR3 |
| 1917 | POU4F2 | HSP90AA1 | CFTR   | HSP90AA1_CFTR  |
| 1918 | POU4F2 | HSP90AA1 | EGFR   | HSP90AA1_EGFR  |
| 1919 | STAT1  | HSP90AA1 | FGFR3  | HSP90AA1_FGFR3 |
| 1920 | STAT1  | HSP90AA1 | CFTR   | HSP90AA1_CFTR  |
| 1921 | STAT1  | HSP90AA1 | EGFR   | HSP90AA1_EGFR  |
| 1922 | FOXA1  | HSPA1A   | TLR4   | HSPA1A_TLR4    |
| 1923 | FOXA1  | HSPA1A   | GRIN2D | HSPA1A_GRIN2D  |
| 1924 | XBP1   | HSPA1A   | TLR4   | HSPA1A_TLR4    |
| 1925 | XBP1   | HSPA1A   | GRIN2D | HSPA1A_GRIN2D  |
| 1926 | HSF1   | HSPA1A   | TLR4   | HSPA1A_TLR4    |
| 1927 | HSF1   | HSPA1A   | GRIN2D | HSPA1A_GRIN2D  |
| 1928 | RELA   | ICAM1    | CAV1   | ICAM1_CAV1     |
| 1929 | RELA   | ICAM1    | IL2RA  | ICAM1_IL2RA    |
| 1930 | RELA   | ICAM1    | ITGB2  | ICAM1_ITGB2    |
| 1931 | RELA   | ICAM1    | ITGAL  | ICAM1_ITGAL    |
| 1932 | RELA   | ICAM1    | EGFR   | ICAM1_EGFR     |
| 1933 | RELA   | ICAM1    | ITGAX  | ICAM1_ITGAX    |
| 1934 | RELA   | ICAM1    | ITGAM  | ICAM1_ITGAM    |
| 1935 | RELA   | ICAM1    | IL2RG  | ICAM1_IL2RG    |
| 1936 | ETV5   | ICAM1    | CAV1   | ICAM1_CAV1     |
| 1937 | ETV5   | ICAM1    | IL2RA  | ICAM1_IL2RA    |
| 1938 | ETV5   | ICAM1    | ITGB2  | ICAM1_ITGB2    |
| 1939 | ETV5   | ICAM1    | ITGAL  | ICAM1_ITGAL    |
| 1940 | ETV5   | ICAM1    | EGFR   | ICAM1_EGFR     |
| 1941 | ETV5   | ICAM1    | ITGAX  | ICAM1_ITGAX    |
| 1942 | ETV5   | ICAM1    | ITGAM  | ICAM1_ITGAM    |
| 1943 | ETV5   | ICAM1    | IL2RG  | ICAM1_IL2RG    |
| 1944 | RARA   | ICAM1    | CAV1   | ICAM1_CAV1     |
| 1945 | RARA   | ICAM1    | IL2RA  | ICAM1_IL2RA    |
| 1946 | RARA   | ICAM1    | ITGB2  | ICAM1_ITGB2    |
| 1947 | RARA   | ICAM1    | ITGAL  | ICAM1_ITGAL    |
| 1948 | RARA   | ICAM1    | EGFR   | ICAM1_EGFR     |
| 1949 | RARA   | ICAM1    | ITGAX  | ICAM1_ITGAX    |
| 1950 | RARA   | ICAM1    | ITGAM  | ICAM1_ITGAM    |
| 1951 | RARA   | ICAM1    | IL2RG  | ICAM1_IL2RG    |
| 1952 | SP1    | ICAM1    | CAV1   | ICAM1_CAV1     |
| 1953 | SP1    | ICAM1    | IL2RA  | ICAM1_IL2RA    |
| 1954 | SP1    | ICAM1    | ITGB2  | ICAM1_ITGB2    |
| 1955 | SP1    | ICAM1    | ITGAL  | ICAM1_ITGAL    |
| 1956 | SP1    | ICAM1    | EGFR   | ICAM1_EGFR     |
| 1957 | SP1    | ICAM1    | ITGAX  | ICAM1_ITGAX    |
| 1958 | SP1    | ICAM1    | ITGAM  | ICAM1_ITGAM    |
| 1959 | SP1    | ICAM1    | IL2RG  | ICAM1_IL2RG    |
| 1960 | TWIST1 | ICAM1    | CAV1   | ICAM1_CAV1     |
| 1961 | TWIST1 | ICAM1    | IL2RA  | ICAM1_IL2RA    |
| 1962 | TWIST1 | ICAM1    | ITGB2  | ICAM1_ITGB2    |
| 1963 | TWIST1 | ICAM1    | ITGAL  | ICAM1_ITGAL    |
| 1964 | TWIST1 | ICAM1    | EGFR   | ICAM1_EGFR     |
| 1965 | TWIST1 | ICAM1    | ITGAX  | ICAM1_ITGAX    |
| 1966 | TWIST1 | ICAM1    | ITGAM  | ICAM1_ITGAM    |
| 1967 | TWIST1 | ICAM1    | IL2RG  | ICAM1_IL2RG    |
| 1968 | HDAC1  | ICAM1    | CAV1   | ICAM1_CAV1     |
| 1969 | HDAC1  | ICAM1    | IL2RA  | ICAM1_IL2RA    |
| 1970 | HDAC1  | ICAM1    | ITGB2  | ICAM1_ITGB2    |
| 1971 | HDAC1  | ICAM1    | ITGAL  | ICAM1_ITGAL    |

|            |       |       |             |
|------------|-------|-------|-------------|
| 1972 HDAC1 | ICAM1 | EGFR  | ICAM1_EGFR  |
| 1973 HDAC1 | ICAM1 | ITGAX | ICAM1_ITGAX |
| 1974 HDAC1 | ICAM1 | ITGAM | ICAM1_ITGAM |
| 1975 HDAC1 | ICAM1 | IL2RG | ICAM1_IL2RG |
| 1976 STAT3 | ICAM1 | CAV1  | ICAM1_CAV1  |
| 1977 STAT3 | ICAM1 | IL2RA | ICAM1_IL2RA |
| 1978 STAT3 | ICAM1 | ITGB2 | ICAM1_ITGB2 |
| 1979 STAT3 | ICAM1 | ITGAL | ICAM1_ITGAL |
| 1980 STAT3 | ICAM1 | EGFR  | ICAM1_EGFR  |
| 1981 STAT3 | ICAM1 | ITGAX | ICAM1_ITGAX |
| 1982 STAT3 | ICAM1 | ITGAM | ICAM1_ITGAM |
| 1983 STAT3 | ICAM1 | IL2RG | ICAM1_IL2RG |
| 1984 ERG   | ICAM1 | CAV1  | ICAM1_CAV1  |
| 1985 ERG   | ICAM1 | IL2RA | ICAM1_IL2RA |
| 1986 ERG   | ICAM1 | ITGB2 | ICAM1_ITGB2 |
| 1987 ERG   | ICAM1 | ITGAL | ICAM1_ITGAL |
| 1988 ERG   | ICAM1 | EGFR  | ICAM1_EGFR  |
| 1989 ERG   | ICAM1 | ITGAX | ICAM1_ITGAX |
| 1990 ERG   | ICAM1 | ITGAM | ICAM1_ITGAM |
| 1991 ERG   | ICAM1 | IL2RG | ICAM1_IL2RG |
| 1992 MYB   | ICAM1 | CAV1  | ICAM1_CAV1  |
| 1993 MYB   | ICAM1 | IL2RA | ICAM1_IL2RA |
| 1994 MYB   | ICAM1 | ITGB2 | ICAM1_ITGB2 |
| 1995 MYB   | ICAM1 | ITGAL | ICAM1_ITGAL |
| 1996 MYB   | ICAM1 | EGFR  | ICAM1_EGFR  |
| 1997 MYB   | ICAM1 | ITGAX | ICAM1_ITGAX |
| 1998 MYB   | ICAM1 | ITGAM | ICAM1_ITGAM |
| 1999 MYB   | ICAM1 | IL2RG | ICAM1_IL2RG |
| 2000 ETS2  | ICAM1 | CAV1  | ICAM1_CAV1  |
| 2001 ETS2  | ICAM1 | IL2RA | ICAM1_IL2RA |
| 2002 ETS2  | ICAM1 | ITGB2 | ICAM1_ITGB2 |
| 2003 ETS2  | ICAM1 | ITGAL | ICAM1_ITGAL |
| 2004 ETS2  | ICAM1 | EGFR  | ICAM1_EGFR  |
| 2005 ETS2  | ICAM1 | ITGAX | ICAM1_ITGAX |
| 2006 ETS2  | ICAM1 | ITGAM | ICAM1_ITGAM |
| 2007 ETS2  | ICAM1 | IL2RG | ICAM1_IL2RG |
| 2008 PPARG | ICAM1 | CAV1  | ICAM1_CAV1  |
| 2009 PPARG | ICAM1 | IL2RA | ICAM1_IL2RA |
| 2010 PPARG | ICAM1 | ITGB2 | ICAM1_ITGB2 |
| 2011 PPARG | ICAM1 | ITGAL | ICAM1_ITGAL |
| 2012 PPARG | ICAM1 | EGFR  | ICAM1_EGFR  |
| 2013 PPARG | ICAM1 | ITGAX | ICAM1_ITGAX |
| 2014 PPARG | ICAM1 | ITGAM | ICAM1_ITGAM |
| 2015 PPARG | ICAM1 | IL2RG | ICAM1_IL2RG |
| 2016 NFKB1 | ICAM1 | CAV1  | ICAM1_CAV1  |
| 2017 NFKB1 | ICAM1 | IL2RA | ICAM1_IL2RA |
| 2018 NFKB1 | ICAM1 | ITGB2 | ICAM1_ITGB2 |
| 2019 NFKB1 | ICAM1 | ITGAL | ICAM1_ITGAL |
| 2020 NFKB1 | ICAM1 | EGFR  | ICAM1_EGFR  |
| 2021 NFKB1 | ICAM1 | ITGAX | ICAM1_ITGAX |
| 2022 NFKB1 | ICAM1 | ITGAM | ICAM1_ITGAM |
| 2023 NFKB1 | ICAM1 | IL2RG | ICAM1_IL2RG |
| 2024 CEBPA | ICAM1 | CAV1  | ICAM1_CAV1  |
| 2025 CEBPA | ICAM1 | IL2RA | ICAM1_IL2RA |
| 2026 CEBPA | ICAM1 | ITGB2 | ICAM1_ITGB2 |
| 2027 CEBPA | ICAM1 | ITGAL | ICAM1_ITGAL |
| 2028 CEBPA | ICAM1 | EGFR  | ICAM1_EGFR  |
| 2029 CEBPA | ICAM1 | ITGAX | ICAM1_ITGAX |

|      |        |       |       |             |
|------|--------|-------|-------|-------------|
| 2030 | CEBPA  | ICAM1 | ITGAM | ICAM1_ITGAM |
| 2031 | CEBPA  | ICAM1 | IL2RG | ICAM1_IL2RG |
| 2032 | NFKBIA | ICAM1 | CAV1  | ICAM1_CAV1  |
| 2033 | NFKBIA | ICAM1 | IL2RA | ICAM1_IL2RA |
| 2034 | NFKBIA | ICAM1 | ITGB2 | ICAM1_ITGB2 |
| 2035 | NFKBIA | ICAM1 | ITGAL | ICAM1_ITGAL |
| 2036 | NFKBIA | ICAM1 | EGFR  | ICAM1_EGFR  |
| 2037 | NFKBIA | ICAM1 | ITGAX | ICAM1_ITGAX |
| 2038 | NFKBIA | ICAM1 | ITGAM | ICAM1_ITGAM |
| 2039 | NFKBIA | ICAM1 | IL2RG | ICAM1_IL2RG |
| 2040 | IFI16  | ICAM1 | CAV1  | ICAM1_CAV1  |
| 2041 | IFI16  | ICAM1 | IL2RA | ICAM1_IL2RA |
| 2042 | IFI16  | ICAM1 | ITGB2 | ICAM1_ITGB2 |
| 2043 | IFI16  | ICAM1 | ITGAL | ICAM1_ITGAL |
| 2044 | IFI16  | ICAM1 | EGFR  | ICAM1_EGFR  |
| 2045 | IFI16  | ICAM1 | ITGAX | ICAM1_ITGAX |
| 2046 | IFI16  | ICAM1 | ITGAM | ICAM1_ITGAM |
| 2047 | IFI16  | ICAM1 | IL2RG | ICAM1_IL2RG |
| 2048 | REL    | ICAM1 | CAV1  | ICAM1_CAV1  |
| 2049 | REL    | ICAM1 | IL2RA | ICAM1_IL2RA |
| 2050 | REL    | ICAM1 | ITGB2 | ICAM1_ITGB2 |
| 2051 | REL    | ICAM1 | ITGAL | ICAM1_ITGAL |
| 2052 | REL    | ICAM1 | EGFR  | ICAM1_EGFR  |
| 2053 | REL    | ICAM1 | ITGAX | ICAM1_ITGAX |
| 2054 | REL    | ICAM1 | ITGAM | ICAM1_ITGAM |
| 2055 | REL    | ICAM1 | IL2RG | ICAM1_IL2RG |
| 2056 | STAT1  | ICAM1 | CAV1  | ICAM1_CAV1  |
| 2057 | STAT1  | ICAM1 | IL2RA | ICAM1_IL2RA |
| 2058 | STAT1  | ICAM1 | ITGB2 | ICAM1_ITGB2 |
| 2059 | STAT1  | ICAM1 | ITGAL | ICAM1_ITGAL |
| 2060 | STAT1  | ICAM1 | EGFR  | ICAM1_EGFR  |
| 2061 | STAT1  | ICAM1 | ITGAX | ICAM1_ITGAX |
| 2062 | STAT1  | ICAM1 | ITGAM | ICAM1_ITGAM |
| 2063 | STAT1  | ICAM1 | IL2RG | ICAM1_IL2RG |
| 2064 | TWIST2 | ICAM1 | CAV1  | ICAM1_CAV1  |
| 2065 | TWIST2 | ICAM1 | IL2RA | ICAM1_IL2RA |
| 2066 | TWIST2 | ICAM1 | ITGB2 | ICAM1_ITGB2 |
| 2067 | TWIST2 | ICAM1 | ITGAL | ICAM1_ITGAL |
| 2068 | TWIST2 | ICAM1 | EGFR  | ICAM1_EGFR  |
| 2069 | TWIST2 | ICAM1 | ITGAX | ICAM1_ITGAX |
| 2070 | TWIST2 | ICAM1 | ITGAM | ICAM1_ITGAM |
| 2071 | TWIST2 | ICAM1 | IL2RG | ICAM1_IL2RG |
| 2072 | RARG   | ICAM1 | CAV1  | ICAM1_CAV1  |
| 2073 | RARG   | ICAM1 | IL2RA | ICAM1_IL2RA |
| 2074 | RARG   | ICAM1 | ITGB2 | ICAM1_ITGB2 |
| 2075 | RARG   | ICAM1 | ITGAL | ICAM1_ITGAL |
| 2076 | RARG   | ICAM1 | EGFR  | ICAM1_EGFR  |
| 2077 | RARG   | ICAM1 | ITGAX | ICAM1_ITGAX |
| 2078 | RARG   | ICAM1 | ITGAM | ICAM1_ITGAM |
| 2079 | RARG   | ICAM1 | IL2RG | ICAM1_IL2RG |
| 2080 | SIRT1  | ICAM1 | CAV1  | ICAM1_CAV1  |
| 2081 | SIRT1  | ICAM1 | IL2RA | ICAM1_IL2RA |
| 2082 | SIRT1  | ICAM1 | ITGB2 | ICAM1_ITGB2 |
| 2083 | SIRT1  | ICAM1 | ITGAL | ICAM1_ITGAL |
| 2084 | SIRT1  | ICAM1 | EGFR  | ICAM1_EGFR  |
| 2085 | SIRT1  | ICAM1 | ITGAX | ICAM1_ITGAX |
| 2086 | SIRT1  | ICAM1 | ITGAM | ICAM1_ITGAM |
| 2087 | SIRT1  | ICAM1 | IL2RG | ICAM1_IL2RG |

|             |       |        |              |
|-------------|-------|--------|--------------|
| 2088 NFATC1 | ICAM1 | CAV1   | ICAM1_CAV1   |
| 2089 NFATC1 | ICAM1 | IL2RA  | ICAM1_IL2RA  |
| 2090 NFATC1 | ICAM1 | ITGB2  | ICAM1_ITGB2  |
| 2091 NFATC1 | ICAM1 | ITGAL  | ICAM1_ITGAL  |
| 2092 NFATC1 | ICAM1 | EGFR   | ICAM1_EGFR   |
| 2093 NFATC1 | ICAM1 | ITGAX  | ICAM1_ITGAX  |
| 2094 NFATC1 | ICAM1 | ITGAM  | ICAM1_ITGAM  |
| 2095 NFATC1 | ICAM1 | IL2RG  | ICAM1_IL2RG  |
| 2096 ERG    | ICAM2 | ITGAL  | ICAM2_ITGAL  |
| 2097 ERG    | ICAM2 | ITGB2  | ICAM2_ITGB2  |
| 2098 ERG    | ICAM2 | ITGAM  | ICAM2_ITGAM  |
| 2099 RUNX3  | ICAM3 | ITGAL  | ICAM3_ITGAL  |
| 2100 RUNX3  | ICAM3 | ITGB2  | ICAM3_ITGB2  |
| 2101 RUNX3  | ICAM3 | ITGAD  | ICAM3_ITGAD  |
| 2102 RUNX3  | ICAM3 | CLEC4M | ICAM3_CLEC4M |
| 2103 STAT1  | IFNG  | IFNGR2 | IFNG_IFNGR2  |
| 2104 STAT1  | IFNG  | IFNGR1 | IFNG_IFNGR1  |
| 2105 NFKB1  | IFNG  | IFNGR2 | IFNG_IFNGR2  |
| 2106 NFKB1  | IFNG  | IFNGR1 | IFNG_IFNGR1  |
| 2107 CREB1  | IFNG  | IFNGR2 | IFNG_IFNGR2  |
| 2108 CREB1  | IFNG  | IFNGR1 | IFNG_IFNGR1  |
| 2109 PARP1  | IFNG  | IFNGR2 | IFNG_IFNGR2  |
| 2110 PARP1  | IFNG  | IFNGR1 | IFNG_IFNGR1  |
| 2111 MYCN   | IFNG  | IFNGR2 | IFNG_IFNGR2  |
| 2112 MYCN   | IFNG  | IFNGR1 | IFNG_IFNGR1  |
| 2113 USF1   | IFNG  | IFNGR2 | IFNG_IFNGR2  |
| 2114 USF1   | IFNG  | IFNGR1 | IFNG_IFNGR1  |
| 2115 STAT3  | IFNG  | IFNGR2 | IFNG_IFNGR2  |
| 2116 STAT3  | IFNG  | IFNGR1 | IFNG_IFNGR1  |
| 2117 JUN    | IFNG  | IFNGR2 | IFNG_IFNGR2  |
| 2118 JUN    | IFNG  | IFNGR1 | IFNG_IFNGR1  |
| 2119 TBX21  | IFNG  | IFNGR2 | IFNG_IFNGR2  |
| 2120 TBX21  | IFNG  | IFNGR1 | IFNG_IFNGR1  |
| 2121 ATF3   | IFNG  | IFNGR2 | IFNG_IFNGR2  |
| 2122 ATF3   | IFNG  | IFNGR1 | IFNG_IFNGR1  |
| 2123 NFATC1 | IFNG  | IFNGR2 | IFNG_IFNGR2  |
| 2124 NFATC1 | IFNG  | IFNGR1 | IFNG_IFNGR1  |
| 2125 STAT4  | IFNG  | IFNGR2 | IFNG_IFNGR2  |
| 2126 STAT4  | IFNG  | IFNGR1 | IFNG_IFNGR1  |
| 2127 RELA   | IFNG  | IFNGR2 | IFNG_IFNGR2  |
| 2128 RELA   | IFNG  | IFNGR1 | IFNG_IFNGR1  |
| 2129 YY1    | IFNG  | IFNGR2 | IFNG_IFNGR2  |
| 2130 YY1    | IFNG  | IFNGR1 | IFNG_IFNGR1  |
| 2131 NFIL3  | IFNG  | IFNGR2 | IFNG_IFNGR2  |
| 2132 NFIL3  | IFNG  | IFNGR1 | IFNG_IFNGR1  |
| 2133 STAT5B | IFNG  | IFNGR2 | IFNG_IFNGR2  |
| 2134 STAT5B | IFNG  | IFNGR1 | IFNG_IFNGR1  |
| 2135 MSC    | IFNG  | IFNGR2 | IFNG_IFNGR2  |
| 2136 MSC    | IFNG  | IFNGR1 | IFNG_IFNGR1  |
| 2137 PROX1  | IFNG  | IFNGR2 | IFNG_IFNGR2  |
| 2138 PROX1  | IFNG  | IFNGR1 | IFNG_IFNGR1  |
| 2139 EGR1   | IFNG  | IFNGR2 | IFNG_IFNGR2  |
| 2140 EGR1   | IFNG  | IFNGR1 | IFNG_IFNGR1  |
| 2141 GATA1  | IFNG  | IFNGR2 | IFNG_IFNGR2  |
| 2142 GATA1  | IFNG  | IFNGR1 | IFNG_IFNGR1  |
| 2143 GATA3  | IFNG  | IFNGR2 | IFNG_IFNGR2  |
| 2144 GATA3  | IFNG  | IFNGR1 | IFNG_IFNGR1  |
| 2145 ATF2   | IFNG  | IFNGR2 | IFNG_IFNGR2  |

|      |         |        |        |             |
|------|---------|--------|--------|-------------|
| 2146 | ATF2    | IFNG   | IFNGR1 | IFNG_IFNGR1 |
| 2147 | TFAP4   | IFNG   | IFNGR2 | IFNG_IFNGR2 |
| 2148 | TFAP4   | IFNG   | IFNGR1 | IFNG_IFNGR1 |
| 2149 | EOMES   | IFNG   | IFNGR2 | IFNG_IFNGR2 |
| 2150 | EOMES   | IFNG   | IFNGR1 | IFNG_IFNGR1 |
| 2151 | STAT5A  | IFNG   | IFNGR2 | IFNG_IFNGR2 |
| 2152 | STAT5A  | IFNG   | IFNGR1 | IFNG_IFNGR1 |
| 2153 | EP300   | IFNG   | IFNGR2 | IFNG_IFNGR2 |
| 2154 | EP300   | IFNG   | IFNGR1 | IFNG_IFNGR1 |
| 2155 | NFATC2  | IFNG   | IFNGR2 | IFNG_IFNGR2 |
| 2156 | NFATC2  | IFNG   | IFNGR1 | IFNG_IFNGR1 |
| 2157 | IRF1    | IFNG   | IFNGR2 | IFNG_IFNGR2 |
| 2158 | IRF1    | IFNG   | IFNGR1 | IFNG_IFNGR1 |
| 2159 | RFX5    | IFNG   | IFNGR2 | IFNG_IFNGR2 |
| 2160 | RFX5    | IFNG   | IFNGR1 | IFNG_IFNGR1 |
| 2161 | NCOR1   | IGF1   | INSR   | IGF1_INSR   |
| 2162 | RB1     | IGF1   | INSR   | IGF1_INSR   |
| 2163 | EP300   | IGF1   | INSR   | IGF1_INSR   |
| 2164 | HDAC2   | IGF1   | INSR   | IGF1_INSR   |
| 2165 | NCOR2   | IGF1   | INSR   | IGF1_INSR   |
| 2166 | BRCA1   | IGF1   | INSR   | IGF1_INSR   |
| 2167 | CEBPA   | IGF1   | INSR   | IGF1_INSR   |
| 2168 | WT1     | IGF1   | INSR   | IGF1_INSR   |
| 2169 | STAT5B  | IGF1   | INSR   | IGF1_INSR   |
| 2170 | OTX2    | IGF1   | INSR   | IGF1_INSR   |
| 2171 | MBD1    | IGF2   | INSR   | IGF2_INSR   |
| 2172 | SP1     | IGF2   | INSR   | IGF2_INSR   |
| 2173 | EGR1    | IGF2   | INSR   | IGF2_INSR   |
| 2174 | ASCL1   | IGF2   | INSR   | IGF2_INSR   |
| 2175 | PLAGL2  | IGF2   | INSR   | IGF2_INSR   |
| 2176 | KHDRBS1 | IGF2   | INSR   | IGF2_INSR   |
| 2177 | PLAG1   | IGF2   | INSR   | IGF2_INSR   |
| 2178 | WT1     | IGF2   | INSR   | IGF2_INSR   |
| 2179 | CTCF    | IGF2   | INSR   | IGF2_INSR   |
| 2180 | EGR2    | IGF2   | INSR   | IGF2_INSR   |
| 2181 | DDX5    | IGF2   | INSR   | IGF2_INSR   |
| 2182 | CEBPA   | IGF2   | INSR   | IGF2_INSR   |
| 2183 | SUZ12   | IGF2   | INSR   | IGF2_INSR   |
| 2184 | HDAC5   | IGF2   | INSR   | IGF2_INSR   |
| 2185 | SP1     | IGFBP4 | FZD8   | IGFBP4_FZD8 |
| 2186 | SP1     | IGFBP4 | LRP6   | IGFBP4_LRP6 |
| 2187 | TBP     | IGFBP4 | FZD8   | IGFBP4_FZD8 |
| 2188 | TBP     | IGFBP4 | LRP6   | IGFBP4_LRP6 |
| 2189 | SP3     | IGFBP4 | FZD8   | IGFBP4_FZD8 |
| 2190 | SP3     | IGFBP4 | LRP6   | IGFBP4_LRP6 |
| 2191 | RUNX2   | IHH    | PTCH2  | IHH_PTCH2   |
| 2192 | STAT1   | IL10   | IL10RA | IL10_IL10RA |
| 2193 | STAT1   | IL10   | SIRPG  | IL10_SIRPG  |
| 2194 | SP1     | IL10   | IL10RA | IL10_IL10RA |
| 2195 | SP1     | IL10   | SIRPG  | IL10_SIRPG  |
| 2196 | HDAC11  | IL10   | IL10RA | IL10_IL10RA |
| 2197 | HDAC11  | IL10   | SIRPG  | IL10_SIRPG  |
| 2198 | GATA3   | IL10   | IL10RA | IL10_IL10RA |
| 2199 | GATA3   | IL10   | SIRPG  | IL10_SIRPG  |
| 2200 | CREB1   | IL10   | IL10RA | IL10_IL10RA |
| 2201 | CREB1   | IL10   | SIRPG  | IL10_SIRPG  |
| 2202 | FLI1    | IL10   | IL10RA | IL10_IL10RA |
| 2203 | FLI1    | IL10   | SIRPG  | IL10_SIRPG  |

|      |       |       |         |               |
|------|-------|-------|---------|---------------|
| 2204 | STAT3 | IL10  | IL10RA  | IL10_IL10RA   |
| 2205 | STAT3 | IL10  | SIRPG   | IL10_SIRPG    |
| 2206 | REL   | IL10  | IL10RA  | IL10_IL10RA   |
| 2207 | REL   | IL10  | SIRPG   | IL10_SIRPG    |
| 2208 | MSC   | IL10  | IL10RA  | IL10_IL10RA   |
| 2209 | MSC   | IL10  | SIRPG   | IL10_SIRPG    |
| 2210 | NR1I2 | IL10  | IL10RA  | IL10_IL10RA   |
| 2211 | NR1I2 | IL10  | SIRPG   | IL10_SIRPG    |
| 2212 | IRF8  | IL10  | IL10RA  | IL10_IL10RA   |
| 2213 | IRF8  | IL10  | SIRPG   | IL10_SIRPG    |
| 2214 | VDR   | IL10  | IL10RA  | IL10_IL10RA   |
| 2215 | VDR   | IL10  | SIRPG   | IL10_SIRPG    |
| 2216 | CEBPA | IL10  | IL10RA  | IL10_IL10RA   |
| 2217 | CEBPA | IL10  | SIRPG   | IL10_SIRPG    |
| 2218 | NFKB1 | IL10  | IL10RA  | IL10_IL10RA   |
| 2219 | NFKB1 | IL10  | SIRPG   | IL10_SIRPG    |
| 2220 | HDAC4 | IL10  | IL10RA  | IL10_IL10RA   |
| 2221 | HDAC4 | IL10  | SIRPG   | IL10_SIRPG    |
| 2222 | RELA  | IL10  | IL10RA  | IL10_IL10RA   |
| 2223 | RELA  | IL10  | SIRPG   | IL10_SIRPG    |
| 2224 | PGR   | IL10  | IL10RA  | IL10_IL10RA   |
| 2225 | PGR   | IL10  | SIRPG   | IL10_SIRPG    |
| 2226 | CEBPB | IL10  | IL10RA  | IL10_IL10RA   |
| 2227 | CEBPB | IL10  | SIRPG   | IL10_SIRPG    |
| 2228 | TBX21 | IL10  | IL10RA  | IL10_IL10RA   |
| 2229 | TBX21 | IL10  | SIRPG   | IL10_SIRPG    |
| 2230 | ATF1  | IL10  | IL10RA  | IL10_IL10RA   |
| 2231 | ATF1  | IL10  | SIRPG   | IL10_SIRPG    |
| 2232 | FOXP3 | IL10  | IL10RA  | IL10_IL10RA   |
| 2233 | FOXP3 | IL10  | SIRPG   | IL10_SIRPG    |
| 2234 | PARP1 | IL10  | IL10RA  | IL10_IL10RA   |
| 2235 | PARP1 | IL10  | SIRPG   | IL10_SIRPG    |
| 2236 | IRF1  | IL10  | IL10RA  | IL10_IL10RA   |
| 2237 | IRF1  | IL10  | SIRPG   | IL10_SIRPG    |
| 2238 | RELA  | IL12A | CD28    | IL12A_CD28    |
| 2239 | RELA  | IL12A | IL12RB2 | IL12A_IL12RB2 |
| 2240 | RELA  | IL12A | IL12RB1 | IL12A_IL12RB1 |
| 2241 | IRF1  | IL12A | CD28    | IL12A_CD28    |
| 2242 | IRF1  | IL12A | IL12RB2 | IL12A_IL12RB2 |
| 2243 | IRF1  | IL12A | IL12RB1 | IL12A_IL12RB1 |
| 2244 | IRF8  | IL12A | CD28    | IL12A_CD28    |
| 2245 | IRF8  | IL12A | IL12RB2 | IL12A_IL12RB2 |
| 2246 | IRF8  | IL12A | IL12RB1 | IL12A_IL12RB1 |
| 2247 | NFKB1 | IL12A | CD28    | IL12A_CD28    |
| 2248 | NFKB1 | IL12A | IL12RB2 | IL12A_IL12RB2 |
| 2249 | NFKB1 | IL12A | IL12RB1 | IL12A_IL12RB1 |
| 2250 | JUN   | IL12A | CD28    | IL12A_CD28    |
| 2251 | JUN   | IL12A | IL12RB2 | IL12A_IL12RB2 |
| 2252 | JUN   | IL12A | IL12RB1 | IL12A_IL12RB1 |
| 2253 | E2F6  | IL13  | IL13RA1 | IL13_IL13RA1  |
| 2254 | E2F6  | IL13  | IL2RG   | IL13_IL2RG    |
| 2255 | CEBPB | IL13  | IL13RA1 | IL13_IL13RA1  |
| 2256 | CEBPB | IL13  | IL2RG   | IL13_IL2RG    |
| 2257 | TBX21 | IL13  | IL13RA1 | IL13_IL13RA1  |
| 2258 | TBX21 | IL13  | IL2RG   | IL13_IL2RG    |
| 2259 | STAT6 | IL13  | IL13RA1 | IL13_IL13RA1  |
| 2260 | STAT6 | IL13  | IL2RG   | IL13_IL2RG    |
| 2261 | AHR   | IL13  | IL13RA1 | IL13_IL13RA1  |

|             |      |          |               |
|-------------|------|----------|---------------|
| 2262 AHR    | IL13 | IL2RG    | IL13_IL2RG    |
| 2263 HOXA10 | IL15 | IL2RA    | IL15_IL2RA    |
| 2264 HOXA10 | IL15 | IL2RG    | IL15_IL2RG    |
| 2265 HOXA10 | IL15 | IL2RB    | IL15_IL2RB    |
| 2266 MYB    | IL15 | IL2RA    | IL15_IL2RA    |
| 2267 MYB    | IL15 | IL2RG    | IL15_IL2RG    |
| 2268 MYB    | IL15 | IL2RB    | IL15_IL2RB    |
| 2269 NFKB1  | IL18 | CD48     | IL18_CD48     |
| 2270 NFKB1  | IL18 | IL1RL2   | IL18_IL1RL2   |
| 2271 NFKB1  | IL18 | IL1RAPL1 | IL18_IL1RAPL1 |
| 2272 NFKB1  | IL18 | IL18R1   | IL18_IL18R1   |
| 2273 NFKB1  | IL18 | IL18RAP  | IL18_IL18RAP  |
| 2274 RELA   | IL18 | CD48     | IL18_CD48     |
| 2275 RELA   | IL18 | IL1RL2   | IL18_IL1RL2   |
| 2276 RELA   | IL18 | IL1RAPL1 | IL18_IL1RAPL1 |
| 2277 RELA   | IL18 | IL18R1   | IL18_IL18R1   |
| 2278 RELA   | IL18 | IL18RAP  | IL18_IL18RAP  |
| 2279 HDAC9  | IL18 | CD48     | IL18_CD48     |
| 2280 HDAC9  | IL18 | IL1RL2   | IL18_IL1RL2   |
| 2281 HDAC9  | IL18 | IL1RAPL1 | IL18_IL1RAPL1 |
| 2282 HDAC9  | IL18 | IL18R1   | IL18_IL18R1   |
| 2283 HDAC9  | IL18 | IL18RAP  | IL18_IL18RAP  |
| 2284 SPI1   | IL18 | CD48     | IL18_CD48     |
| 2285 SPI1   | IL18 | IL1RL2   | IL18_IL1RL2   |
| 2286 SPI1   | IL18 | IL1RAPL1 | IL18_IL1RAPL1 |
| 2287 SPI1   | IL18 | IL18R1   | IL18_IL18R1   |
| 2288 SPI1   | IL18 | IL18RAP  | IL18_IL18RAP  |
| 2289 FOS    | IL1A | IL1R2    | IL1A_IL1R2    |
| 2290 RELA   | IL1A | IL1R2    | IL1A_IL1R2    |
| 2291 JUN    | IL1A | IL1R2    | IL1A_IL1R2    |
| 2292 NFKB1  | IL1A | IL1R2    | IL1A_IL1R2    |
| 2293 SPI1   | IL1B | IL1R1    | IL1B_IL1R1    |
| 2294 SPI1   | IL1B | ADRB2    | IL1B_ADRB2    |
| 2295 SPI1   | IL1B | IL1RAP   | IL1B_IL1RAP   |
| 2296 SPI1   | IL1B | IL1R2    | IL1B_IL1R2    |
| 2297 CEBPB  | IL1B | IL1R1    | IL1B_IL1R1    |
| 2298 CEBPB  | IL1B | ADRB2    | IL1B_ADRB2    |
| 2299 CEBPB  | IL1B | IL1RAP   | IL1B_IL1RAP   |
| 2300 CEBPB  | IL1B | IL1R2    | IL1B_IL1R2    |
| 2301 HMGA1  | IL1B | IL1R1    | IL1B_IL1R1    |
| 2302 HMGA1  | IL1B | ADRB2    | IL1B_ADRB2    |
| 2303 HMGA1  | IL1B | IL1RAP   | IL1B_IL1RAP   |
| 2304 HMGA1  | IL1B | IL1R2    | IL1B_IL1R2    |
| 2305 REL    | IL1B | IL1R1    | IL1B_IL1R1    |
| 2306 REL    | IL1B | ADRB2    | IL1B_ADRB2    |
| 2307 REL    | IL1B | IL1RAP   | IL1B_IL1RAP   |
| 2308 REL    | IL1B | IL1R2    | IL1B_IL1R2    |
| 2309 SUGP1  | IL1B | IL1R1    | IL1B_IL1R1    |
| 2310 SUGP1  | IL1B | ADRB2    | IL1B_ADRB2    |
| 2311 SUGP1  | IL1B | IL1RAP   | IL1B_IL1RAP   |
| 2312 SUGP1  | IL1B | IL1R2    | IL1B_IL1R2    |
| 2313 NFKB1  | IL1B | IL1R1    | IL1B_IL1R1    |
| 2314 NFKB1  | IL1B | ADRB2    | IL1B_ADRB2    |
| 2315 NFKB1  | IL1B | IL1RAP   | IL1B_IL1RAP   |
| 2316 NFKB1  | IL1B | IL1R2    | IL1B_IL1R2    |
| 2317 NFKBIA | IL1B | IL1R1    | IL1B_IL1R1    |
| 2318 NFKBIA | IL1B | ADRB2    | IL1B_ADRB2    |
| 2319 NFKBIA | IL1B | IL1RAP   | IL1B_IL1RAP   |



|             |       |        |             |
|-------------|-------|--------|-------------|
| 2320 NFKBIA | IL1B  | IL1R2  | IL1B_IL1R2  |
| 2321 SIRT1  | IL1B  | IL1R1  | IL1B_IL1R1  |
| 2322 SIRT1  | IL1B  | ADRB2  | IL1B_ADRB2  |
| 2323 SIRT1  | IL1B  | IL1RAP | IL1B_IL1RAP |
| 2324 SIRT1  | IL1B  | IL1R2  | IL1B_IL1R2  |
| 2325 RELA   | IL1B  | IL1R1  | IL1B_IL1R1  |
| 2326 RELA   | IL1B  | ADRB2  | IL1B_ADRB2  |
| 2327 RELA   | IL1B  | IL1RAP | IL1B_IL1RAP |
| 2328 RELA   | IL1B  | IL1R2  | IL1B_IL1R2  |
| 2329 KLF4   | IL1B  | IL1R1  | IL1B_IL1R1  |
| 2330 KLF4   | IL1B  | ADRB2  | IL1B_ADRB2  |
| 2331 KLF4   | IL1B  | IL1RAP | IL1B_IL1RAP |
| 2332 KLF4   | IL1B  | IL1R2  | IL1B_IL1R2  |
| 2333 YY1    | IL1B  | IL1R1  | IL1B_IL1R1  |
| 2334 YY1    | IL1B  | ADRB2  | IL1B_ADRB2  |
| 2335 YY1    | IL1B  | IL1RAP | IL1B_IL1RAP |
| 2336 YY1    | IL1B  | IL1R2  | IL1B_IL1R2  |
| 2337 JUN    | IL1B  | IL1R1  | IL1B_IL1R1  |
| 2338 JUN    | IL1B  | ADRB2  | IL1B_ADRB2  |
| 2339 JUN    | IL1B  | IL1RAP | IL1B_IL1RAP |
| 2340 JUN    | IL1B  | IL1R2  | IL1B_IL1R2  |
| 2341 JUNB   | IL1B  | IL1R1  | IL1B_IL1R1  |
| 2342 JUNB   | IL1B  | ADRB2  | IL1B_ADRB2  |
| 2343 JUNB   | IL1B  | IL1RAP | IL1B_IL1RAP |
| 2344 JUNB   | IL1B  | IL1R2  | IL1B_IL1R2  |
| 2345 E2F1   | IL1B  | IL1R1  | IL1B_IL1R1  |
| 2346 E2F1   | IL1B  | ADRB2  | IL1B_ADRB2  |
| 2347 E2F1   | IL1B  | IL1RAP | IL1B_IL1RAP |
| 2348 E2F1   | IL1B  | IL1R2  | IL1B_IL1R2  |
| 2349 NFIL3  | IL1B  | IL1R1  | IL1B_IL1R1  |
| 2350 NFIL3  | IL1B  | ADRB2  | IL1B_ADRB2  |
| 2351 NFIL3  | IL1B  | IL1RAP | IL1B_IL1RAP |
| 2352 NFIL3  | IL1B  | IL1R2  | IL1B_IL1R2  |
| 2353 HSF1   | IL1B  | IL1R1  | IL1B_IL1R1  |
| 2354 HSF1   | IL1B  | ADRB2  | IL1B_ADRB2  |
| 2355 HSF1   | IL1B  | IL1RAP | IL1B_IL1RAP |
| 2356 HSF1   | IL1B  | IL1R2  | IL1B_IL1R2  |
| 2357 STAT1  | IL1B  | IL1R1  | IL1B_IL1R1  |
| 2358 STAT1  | IL1B  | ADRB2  | IL1B_ADRB2  |
| 2359 STAT1  | IL1B  | IL1RAP | IL1B_IL1RAP |
| 2360 STAT1  | IL1B  | IL1R2  | IL1B_IL1R2  |
| 2361 IRF8   | IL1B  | IL1R1  | IL1B_IL1R1  |
| 2362 IRF8   | IL1B  | ADRB2  | IL1B_ADRB2  |
| 2363 IRF8   | IL1B  | IL1RAP | IL1B_IL1RAP |
| 2364 IRF8   | IL1B  | IL1R2  | IL1B_IL1R2  |
| 2365 AHR    | IL1B  | IL1R1  | IL1B_IL1R1  |
| 2366 AHR    | IL1B  | ADRB2  | IL1B_ADRB2  |
| 2367 AHR    | IL1B  | IL1RAP | IL1B_IL1RAP |
| 2368 AHR    | IL1B  | IL1R2  | IL1B_IL1R2  |
| 2369 RELA   | IL1RN | IL1R2  | IL1RN_IL1R2 |
| 2370 STAT3  | IL1RN | IL1R2  | IL1RN_IL1R2 |
| 2371 NFKB1  | IL1RN | IL1R2  | IL1RN_IL1R2 |
| 2372 NFKB1  | IL2   | IL2RG  | IL2_IL2RG   |
| 2373 NFKB1  | IL2   | IL2RB  | IL2_IL2RB   |
| 2374 NFKB1  | IL2   | IL2RA  | IL2_IL2RA   |
| 2375 NFKB1  | IL2   | CD53   | IL2_CD53    |
| 2376 HDAC1  | IL2   | IL2RG  | IL2_IL2RG   |
| 2377 HDAC1  | IL2   | IL2RB  | IL2_IL2RB   |

|             |     |       |           |
|-------------|-----|-------|-----------|
| 2378 HDAC1  | IL2 | IL2RA | IL2_IL2RA |
| 2379 HDAC1  | IL2 | CD53  | IL2_CD53  |
| 2380 CREM   | IL2 | IL2RG | IL2_IL2RG |
| 2381 CREM   | IL2 | IL2RB | IL2_IL2RB |
| 2382 CREM   | IL2 | IL2RA | IL2_IL2RA |
| 2383 CREM   | IL2 | CD53  | IL2_CD53  |
| 2384 POU2F1 | IL2 | IL2RG | IL2_IL2RG |
| 2385 POU2F1 | IL2 | IL2RB | IL2_IL2RB |
| 2386 POU2F1 | IL2 | IL2RA | IL2_IL2RA |
| 2387 POU2F1 | IL2 | CD53  | IL2_CD53  |
| 2388 ILF3   | IL2 | IL2RG | IL2_IL2RG |
| 2389 ILF3   | IL2 | IL2RB | IL2_IL2RB |
| 2390 ILF3   | IL2 | IL2RA | IL2_IL2RA |
| 2391 ILF3   | IL2 | CD53  | IL2_CD53  |
| 2392 VDR    | IL2 | IL2RG | IL2_IL2RG |
| 2393 VDR    | IL2 | IL2RB | IL2_IL2RB |
| 2394 VDR    | IL2 | IL2RA | IL2_IL2RA |
| 2395 VDR    | IL2 | CD53  | IL2_CD53  |
| 2396 RELA   | IL2 | IL2RG | IL2_IL2RG |
| 2397 RELA   | IL2 | IL2RB | IL2_IL2RB |
| 2398 RELA   | IL2 | IL2RA | IL2_IL2RA |
| 2399 RELA   | IL2 | CD53  | IL2_CD53  |
| 2400 JUN    | IL2 | IL2RG | IL2_IL2RG |
| 2401 JUN    | IL2 | IL2RB | IL2_IL2RB |
| 2402 JUN    | IL2 | IL2RA | IL2_IL2RA |
| 2403 JUN    | IL2 | CD53  | IL2_CD53  |
| 2404 ETS1   | IL2 | IL2RG | IL2_IL2RG |
| 2405 ETS1   | IL2 | IL2RB | IL2_IL2RB |
| 2406 ETS1   | IL2 | IL2RA | IL2_IL2RA |
| 2407 ETS1   | IL2 | CD53  | IL2_CD53  |
| 2408 STAT3  | IL2 | IL2RG | IL2_IL2RG |
| 2409 STAT3  | IL2 | IL2RB | IL2_IL2RB |
| 2410 STAT3  | IL2 | IL2RA | IL2_IL2RA |
| 2411 STAT3  | IL2 | CD53  | IL2_CD53  |
| 2412 FOXK2  | IL2 | IL2RG | IL2_IL2RG |
| 2413 FOXK2  | IL2 | IL2RB | IL2_IL2RB |
| 2414 FOXK2  | IL2 | IL2RA | IL2_IL2RA |
| 2415 FOXK2  | IL2 | CD53  | IL2_CD53  |
| 2416 CREB1  | IL2 | IL2RG | IL2_IL2RG |
| 2417 CREB1  | IL2 | IL2RB | IL2_IL2RB |
| 2418 CREB1  | IL2 | IL2RA | IL2_IL2RA |
| 2419 CREB1  | IL2 | CD53  | IL2_CD53  |
| 2420 TOB1   | IL2 | IL2RG | IL2_IL2RG |
| 2421 TOB1   | IL2 | IL2RB | IL2_IL2RB |
| 2422 TOB1   | IL2 | IL2RA | IL2_IL2RA |
| 2423 TOB1   | IL2 | CD53  | IL2_CD53  |
| 2424 SATB1  | IL2 | IL2RG | IL2_IL2RG |
| 2425 SATB1  | IL2 | IL2RB | IL2_IL2RB |
| 2426 SATB1  | IL2 | IL2RA | IL2_IL2RA |
| 2427 SATB1  | IL2 | CD53  | IL2_CD53  |
| 2428 ILF2   | IL2 | IL2RG | IL2_IL2RG |
| 2429 ILF2   | IL2 | IL2RB | IL2_IL2RB |
| 2430 ILF2   | IL2 | IL2RA | IL2_IL2RA |
| 2431 ILF2   | IL2 | CD53  | IL2_CD53  |
| 2432 REL    | IL2 | IL2RG | IL2_IL2RG |
| 2433 REL    | IL2 | IL2RB | IL2_IL2RB |
| 2434 REL    | IL2 | IL2RA | IL2_IL2RA |
| 2435 REL    | IL2 | CD53  | IL2_CD53  |

|             |      |         |             |
|-------------|------|---------|-------------|
| 2436 SP1    | IL2  | IL2RG   | IL2_IL2RG   |
| 2437 SP1    | IL2  | IL2RB   | IL2_IL2RB   |
| 2438 SP1    | IL2  | IL2RA   | IL2_IL2RA   |
| 2439 SP1    | IL2  | CD53    | IL2_CD53    |
| 2440 BACH2  | IL2  | IL2RG   | IL2_IL2RG   |
| 2441 BACH2  | IL2  | IL2RB   | IL2_IL2RB   |
| 2442 BACH2  | IL2  | IL2RA   | IL2_IL2RA   |
| 2443 BACH2  | IL2  | CD53    | IL2_CD53    |
| 2444 KLF2   | IL2  | IL2RG   | IL2_IL2RG   |
| 2445 KLF2   | IL2  | IL2RB   | IL2_IL2RB   |
| 2446 KLF2   | IL2  | IL2RA   | IL2_IL2RA   |
| 2447 KLF2   | IL2  | CD53    | IL2_CD53    |
| 2448 EGR1   | IL2  | IL2RG   | IL2_IL2RG   |
| 2449 EGR1   | IL2  | IL2RB   | IL2_IL2RB   |
| 2450 EGR1   | IL2  | IL2RA   | IL2_IL2RA   |
| 2451 EGR1   | IL2  | CD53    | IL2_CD53    |
| 2452 NFATC1 | IL2  | IL2RG   | IL2_IL2RG   |
| 2453 NFATC1 | IL2  | IL2RB   | IL2_IL2RB   |
| 2454 NFATC1 | IL2  | IL2RA   | IL2_IL2RA   |
| 2455 NFATC1 | IL2  | CD53    | IL2_CD53    |
| 2456 FOXP3  | IL2  | IL2RG   | IL2_IL2RG   |
| 2457 FOXP3  | IL2  | IL2RB   | IL2_IL2RB   |
| 2458 FOXP3  | IL2  | IL2RA   | IL2_IL2RA   |
| 2459 FOXP3  | IL2  | CD53    | IL2_CD53    |
| 2460 KAT5   | IL2  | IL2RG   | IL2_IL2RG   |
| 2461 KAT5   | IL2  | IL2RB   | IL2_IL2RB   |
| 2462 KAT5   | IL2  | IL2RA   | IL2_IL2RA   |
| 2463 KAT5   | IL2  | CD53    | IL2_CD53    |
| 2464 RUNX1  | IL2  | IL2RG   | IL2_IL2RG   |
| 2465 RUNX1  | IL2  | IL2RB   | IL2_IL2RB   |
| 2466 RUNX1  | IL2  | IL2RA   | IL2_IL2RA   |
| 2467 RUNX1  | IL2  | CD53    | IL2_CD53    |
| 2468 ZFP36  | IL2  | IL2RG   | IL2_IL2RG   |
| 2469 ZFP36  | IL2  | IL2RB   | IL2_IL2RB   |
| 2470 ZFP36  | IL2  | IL2RA   | IL2_IL2RA   |
| 2471 ZFP36  | IL2  | CD53    | IL2_CD53    |
| 2472 NFKB1  | IL21 | IL2RG   | IL21_IL2RG  |
| 2473 STAT3  | IL21 | IL2RG   | IL21_IL2RG  |
| 2474 RORC   | IL22 | IL10RA  | IL22_IL10RA |
| 2475 CEBPB  | IL4  | CD53    | IL4_CD53    |
| 2476 CEBPB  | IL4  | IL13RA1 | IL4_IL13RA1 |
| 2477 CEBPB  | IL4  | IL2RG   | IL4_IL2RG   |
| 2478 POU2F1 | IL4  | CD53    | IL4_CD53    |
| 2479 POU2F1 | IL4  | IL13RA1 | IL4_IL13RA1 |
| 2480 POU2F1 | IL4  | IL2RG   | IL4_IL2RG   |
| 2481 JUNB   | IL4  | CD53    | IL4_CD53    |
| 2482 JUNB   | IL4  | IL13RA1 | IL4_IL13RA1 |
| 2483 JUNB   | IL4  | IL2RG   | IL4_IL2RG   |
| 2484 CREBBP | IL4  | CD53    | IL4_CD53    |
| 2485 CREBBP | IL4  | IL13RA1 | IL4_IL13RA1 |
| 2486 CREBBP | IL4  | IL2RG   | IL4_IL2RG   |
| 2487 STAT6  | IL4  | CD53    | IL4_CD53    |
| 2488 STAT6  | IL4  | IL13RA1 | IL4_IL13RA1 |
| 2489 STAT6  | IL4  | IL2RG   | IL4_IL2RG   |
| 2490 YY1    | IL4  | CD53    | IL4_CD53    |
| 2491 YY1    | IL4  | IL13RA1 | IL4_IL13RA1 |
| 2492 YY1    | IL4  | IL2RG   | IL4_IL2RG   |
| 2493 IRF2   | IL4  | CD53    | IL4_CD53    |

|             |     |         |             |
|-------------|-----|---------|-------------|
| 2494 IRF2   | IL4 | IL13RA1 | IL4_IL13RA1 |
| 2495 IRF2   | IL4 | IL2RG   | IL4_IL2RG   |
| 2496 TBX21  | IL4 | CD53    | IL4_CD53    |
| 2497 TBX21  | IL4 | IL13RA1 | IL4_IL13RA1 |
| 2498 TBX21  | IL4 | IL2RG   | IL4_IL2RG   |
| 2499 CIITA  | IL4 | CD53    | IL4_CD53    |
| 2500 CIITA  | IL4 | IL13RA1 | IL4_IL13RA1 |
| 2501 CIITA  | IL4 | IL2RG   | IL4_IL2RG   |
| 2502 NFKB1  | IL4 | CD53    | IL4_CD53    |
| 2503 NFKB1  | IL4 | IL13RA1 | IL4_IL13RA1 |
| 2504 NFKB1  | IL4 | IL2RG   | IL4_IL2RG   |
| 2505 SATB1  | IL4 | CD53    | IL4_CD53    |
| 2506 SATB1  | IL4 | IL13RA1 | IL4_IL13RA1 |
| 2507 SATB1  | IL4 | IL2RG   | IL4_IL2RG   |
| 2508 SPIC   | IL4 | CD53    | IL4_CD53    |
| 2509 SPIC   | IL4 | IL13RA1 | IL4_IL13RA1 |
| 2510 SPIC   | IL4 | IL2RG   | IL4_IL2RG   |
| 2511 MAF    | IL4 | CD53    | IL4_CD53    |
| 2512 MAF    | IL4 | IL13RA1 | IL4_IL13RA1 |
| 2513 MAF    | IL4 | IL2RG   | IL4_IL2RG   |
| 2514 RELA   | IL4 | CD53    | IL4_CD53    |
| 2515 RELA   | IL4 | IL13RA1 | IL4_IL13RA1 |
| 2516 RELA   | IL4 | IL2RG   | IL4_IL2RG   |
| 2517 GATA3  | IL4 | CD53    | IL4_CD53    |
| 2518 GATA3  | IL4 | IL13RA1 | IL4_IL13RA1 |
| 2519 GATA3  | IL4 | IL2RG   | IL4_IL2RG   |
| 2520 EP300  | IL5 | IL5RA   | IL5_IL5RA   |
| 2521 MAF    | IL5 | IL5RA   | IL5_IL5RA   |
| 2522 JUND   | IL5 | IL5RA   | IL5_IL5RA   |
| 2523 YY1    | IL5 | IL5RA   | IL5_IL5RA   |
| 2524 GATA4  | IL5 | IL5RA   | IL5_IL5RA   |
| 2525 FOSL2  | IL5 | IL5RA   | IL5_IL5RA   |
| 2526 POU2F2 | IL5 | IL5RA   | IL5_IL5RA   |
| 2527 SPI1   | IL5 | IL5RA   | IL5_IL5RA   |
| 2528 ETS2   | IL5 | IL5RA   | IL5_IL5RA   |
| 2529 GATA3  | IL5 | IL5RA   | IL5_IL5RA   |
| 2530 ETS1   | IL5 | IL5RA   | IL5_IL5RA   |
| 2531 CEBPA  | IL5 | IL5RA   | IL5_IL5RA   |
| 2532 HDAC4  | IL5 | IL5RA   | IL5_IL5RA   |
| 2533 POU2F1 | IL5 | IL5RA   | IL5_IL5RA   |
| 2534 SATB1  | IL5 | IL5RA   | IL5_IL5RA   |
| 2535 CEBPB  | IL5 | IL5RA   | IL5_IL5RA   |
| 2536 XBP1   | IL6 | F3      | IL6_F3      |
| 2537 XBP1   | IL6 | IL6R    | IL6_IL6R    |
| 2538 XBP1   | IL6 | IL6ST   | IL6_IL6ST   |
| 2539 GBX2   | IL6 | F3      | IL6_F3      |
| 2540 GBX2   | IL6 | IL6R    | IL6_IL6R    |
| 2541 GBX2   | IL6 | IL6ST   | IL6_IL6ST   |
| 2542 CEBPB  | IL6 | F3      | IL6_F3      |
| 2543 CEBPB  | IL6 | IL6R    | IL6_IL6R    |
| 2544 CEBPB  | IL6 | IL6ST   | IL6_IL6ST   |
| 2545 NFKB1  | IL6 | F3      | IL6_F3      |
| 2546 NFKB1  | IL6 | IL6R    | IL6_IL6R    |
| 2547 NFKB1  | IL6 | IL6ST   | IL6_IL6ST   |
| 2548 MYC    | IL6 | F3      | IL6_F3      |
| 2549 MYC    | IL6 | IL6R    | IL6_IL6R    |
| 2550 MYC    | IL6 | IL6ST   | IL6_IL6ST   |
| 2551 STAT1  | IL6 | F3      | IL6_F3      |

|      |       |     |       |           |
|------|-------|-----|-------|-----------|
| 2552 | STAT1 | IL6 | IL6R  | IL6_IL6R  |
| 2553 | STAT1 | IL6 | IL6ST | IL6_IL6ST |
| 2554 | STAT3 | IL6 | F3    | IL6_F3    |
| 2555 | STAT3 | IL6 | IL6R  | IL6_IL6R  |
| 2556 | STAT3 | IL6 | IL6ST | IL6_IL6ST |
| 2557 | DDIT3 | IL6 | F3    | IL6_F3    |
| 2558 | DDIT3 | IL6 | IL6R  | IL6_IL6R  |
| 2559 | DDIT3 | IL6 | IL6ST | IL6_IL6ST |
| 2560 | ATF4  | IL6 | F3    | IL6_F3    |
| 2561 | ATF4  | IL6 | IL6R  | IL6_IL6R  |
| 2562 | ATF4  | IL6 | IL6ST | IL6_IL6ST |
| 2563 | AHR   | IL6 | F3    | IL6_F3    |
| 2564 | AHR   | IL6 | IL6R  | IL6_IL6R  |
| 2565 | AHR   | IL6 | IL6ST | IL6_IL6ST |
| 2566 | ZFP36 | IL6 | F3    | IL6_F3    |
| 2567 | ZFP36 | IL6 | IL6R  | IL6_IL6R  |
| 2568 | ZFP36 | IL6 | IL6ST | IL6_IL6ST |
| 2569 | FOXO1 | IL6 | F3    | IL6_F3    |
| 2570 | FOXO1 | IL6 | IL6R  | IL6_IL6R  |
| 2571 | FOXO1 | IL6 | IL6ST | IL6_IL6ST |
| 2572 | TBP   | IL6 | F3    | IL6_F3    |
| 2573 | TBP   | IL6 | IL6R  | IL6_IL6R  |
| 2574 | TBP   | IL6 | IL6ST | IL6_IL6ST |
| 2575 | REL   | IL6 | F3    | IL6_F3    |
| 2576 | REL   | IL6 | IL6R  | IL6_IL6R  |
| 2577 | REL   | IL6 | IL6ST | IL6_IL6ST |
| 2578 | RELA  | IL6 | F3    | IL6_F3    |
| 2579 | RELA  | IL6 | IL6R  | IL6_IL6R  |
| 2580 | RELA  | IL6 | IL6ST | IL6_IL6ST |
| 2581 | JUND  | IL6 | F3    | IL6_F3    |
| 2582 | JUND  | IL6 | IL6R  | IL6_IL6R  |
| 2583 | JUND  | IL6 | IL6ST | IL6_IL6ST |
| 2584 | EGR1  | IL6 | F3    | IL6_F3    |
| 2585 | EGR1  | IL6 | IL6R  | IL6_IL6R  |
| 2586 | EGR1  | IL6 | IL6ST | IL6_IL6ST |
| 2587 | JUN   | IL6 | F3    | IL6_F3    |
| 2588 | JUN   | IL6 | IL6R  | IL6_IL6R  |
| 2589 | JUN   | IL6 | IL6ST | IL6_IL6ST |
| 2590 | RBPJ  | IL6 | F3    | IL6_F3    |
| 2591 | RBPJ  | IL6 | IL6R  | IL6_IL6R  |
| 2592 | RBPJ  | IL6 | IL6ST | IL6_IL6ST |
| 2593 | EGR2  | IL6 | F3    | IL6_F3    |
| 2594 | EGR2  | IL6 | IL6R  | IL6_IL6R  |
| 2595 | EGR2  | IL6 | IL6ST | IL6_IL6ST |
| 2596 | CEBPA | IL6 | F3    | IL6_F3    |
| 2597 | CEBPA | IL6 | IL6R  | IL6_IL6R  |
| 2598 | CEBPA | IL6 | IL6ST | IL6_IL6ST |
| 2599 | KLF4  | IL6 | F3    | IL6_F3    |
| 2600 | KLF4  | IL6 | IL6R  | IL6_IL6R  |
| 2601 | KLF4  | IL6 | IL6ST | IL6_IL6ST |
| 2602 | SP1   | IL6 | F3    | IL6_F3    |
| 2603 | SP1   | IL6 | IL6R  | IL6_IL6R  |
| 2604 | SP1   | IL6 | IL6ST | IL6_IL6ST |
| 2605 | VDR   | IL6 | F3    | IL6_F3    |
| 2606 | VDR   | IL6 | IL6R  | IL6_IL6R  |
| 2607 | VDR   | IL6 | IL6ST | IL6_IL6ST |
| 2608 | OTX2  | IL6 | F3    | IL6_F3    |
| 2609 | OTX2  | IL6 | IL6R  | IL6_IL6R  |

|              |       |        |              |
|--------------|-------|--------|--------------|
| 2610 OTX2    | IL6   | IL6ST  | IL6_IL6ST    |
| 2611 CREB1   | IL6   | F3     | IL6_F3       |
| 2612 CREB1   | IL6   | IL6R   | IL6_IL6R     |
| 2613 CREB1   | IL6   | IL6ST  | IL6_IL6ST    |
| 2614 EP300   | IL6   | F3     | IL6_F3       |
| 2615 EP300   | IL6   | IL6R   | IL6_IL6R     |
| 2616 EP300   | IL6   | IL6ST  | IL6_IL6ST    |
| 2617 PPARA   | IL6   | F3     | IL6_F3       |
| 2618 PPARA   | IL6   | IL6R   | IL6_IL6R     |
| 2619 PPARA   | IL6   | IL6ST  | IL6_IL6ST    |
| 2620 ZNF300  | IL6   | F3     | IL6_F3       |
| 2621 ZNF300  | IL6   | IL6R   | IL6_IL6R     |
| 2622 ZNF300  | IL6   | IL6ST  | IL6_IL6ST    |
| 2623 ZMYND11 | IL6   | F3     | IL6_F3       |
| 2624 ZMYND11 | IL6   | IL6R   | IL6_IL6R     |
| 2625 ZMYND11 | IL6   | IL6ST  | IL6_IL6ST    |
| 2626 MYB     | IL7   | IL7R   | IL7_IL7R     |
| 2627 MYB     | IL7   | IL2RG  | IL7_IL2RG    |
| 2628 NEUROD1 | INS   | INSR   | INS_INSR     |
| 2629 PDX1    | INS   | INSR   | INS_INSR     |
| 2630 PAX4    | INS   | INSR   | INS_INSR     |
| 2631 ATF2    | INS   | INSR   | INS_INSR     |
| 2632 GLIS3   | INS   | INSR   | INS_INSR     |
| 2633 KLF11   | INS   | INSR   | INS_INSR     |
| 2634 NR1H4   | INS   | INSR   | INS_INSR     |
| 2635 TCF3    | INS   | INSR   | INS_INSR     |
| 2636 MAFA    | INS   | INSR   | INS_INSR     |
| 2637 SP1     | KISS1 | KISS1R | KISS1_KISS1R |
| 2638 TFAP2A  | KISS1 | KISS1R | KISS1_KISS1R |
| 2639 AR      | KISS1 | KISS1R | KISS1_KISS1R |
| 2640 MED23   | KISS1 | KISS1R | KISS1_KISS1R |
| 2641 PAX2    | L1CAM | EGFR   | L1CAM_EGFR   |
| 2642 PAX2    | L1CAM | ERBB3  | L1CAM_ERBB3  |
| 2643 TFAP2A  | L1CAM | EGFR   | L1CAM_EGFR   |
| 2644 TFAP2A  | L1CAM | ERBB3  | L1CAM_ERBB3  |
| 2645 KLF6    | LAMA1 | SDC4   | LAMA1_SDC4   |
| 2646 KLF6    | LAMA1 | RPSA   | LAMA1_RPSA   |
| 2647 KLF6    | LAMA1 | ITGB1  | LAMA1_ITGB1  |
| 2648 KLF6    | LAMA1 | NT5E   | LAMA1_NT5E   |
| 2649 KLF6    | LAMA1 | ITGB8  | LAMA1_ITGB8  |
| 2650 KLF6    | LAMA1 | ITGA3  | LAMA1_ITGA3  |
| 2651 SP3     | LAMA1 | SDC4   | LAMA1_SDC4   |
| 2652 SP3     | LAMA1 | RPSA   | LAMA1_RPSA   |
| 2653 SP3     | LAMA1 | ITGB1  | LAMA1_ITGB1  |
| 2654 SP3     | LAMA1 | NT5E   | LAMA1_NT5E   |
| 2655 SP3     | LAMA1 | ITGB8  | LAMA1_ITGB8  |
| 2656 SP3     | LAMA1 | ITGA3  | LAMA1_ITGA3  |
| 2657 SP1     | LAMA1 | SDC4   | LAMA1_SDC4   |
| 2658 SP1     | LAMA1 | RPSA   | LAMA1_RPSA   |
| 2659 SP1     | LAMA1 | ITGB1  | LAMA1_ITGB1  |
| 2660 SP1     | LAMA1 | NT5E   | LAMA1_NT5E   |
| 2661 SP1     | LAMA1 | ITGB8  | LAMA1_ITGB8  |
| 2662 SP1     | LAMA1 | ITGA3  | LAMA1_ITGA3  |
| 2663 KLF4    | LAMA1 | SDC4   | LAMA1_SDC4   |
| 2664 KLF4    | LAMA1 | RPSA   | LAMA1_RPSA   |
| 2665 KLF4    | LAMA1 | ITGB1  | LAMA1_ITGB1  |
| 2666 KLF4    | LAMA1 | NT5E   | LAMA1_NT5E   |
| 2667 KLF4    | LAMA1 | ITGB8  | LAMA1_ITGB8  |

|             |          |          |                |
|-------------|----------|----------|----------------|
| 2668 KLF4   | LAMA1    | ITGA3    | LAMA1_ITGA3    |
| 2669 SSB    | LAMB1    | ITGA3    | LAMB1_ITGA3    |
| 2670 SSB    | LAMB1    | ITGB1    | LAMB1_ITGB1    |
| 2671 NANOG  | LAMB1    | ITGA3    | LAMB1_ITGA3    |
| 2672 NANOG  | LAMB1    | ITGB1    | LAMB1_ITGB1    |
| 2673 ZEB1   | LAMC2    | ITGB1    | LAMC2_ITGB1    |
| 2674 ZEB1   | LAMC2    | CD151    | LAMC2_CD151    |
| 2675 ZEB1   | LAMC2    | ITGA3    | LAMC2_ITGA3    |
| 2676 CREB5  | LGALS3BP | ITGB1    | LGALS3BP_ITGB1 |
| 2677 CREB5  | LGALS3BP | VANG1    | LGALS3BP_VANG1 |
| 2678 STAT3  | LGALS3BP | ITGB1    | LGALS3BP_ITGB1 |
| 2679 STAT3  | LGALS3BP | VANG1    | LGALS3BP_VANG1 |
| 2680 HNF4A  | LIPC     | LRP1     | LIPC_LRP1      |
| 2681 SREBF2 | LIPC     | LRP1     | LIPC_LRP1      |
| 2682 USF2   | LIPC     | LRP1     | LIPC_LRP1      |
| 2683 USF1   | LIPC     | LRP1     | LIPC_LRP1      |
| 2684 PPARA  | LPL      | LRP1     | LPL_LRP1       |
| 2685 PPARA  | LPL      | CD44     | LPL_CD44       |
| 2686 PPARA  | LPL      | GPIHBP1  | LPL_GPIHBP1    |
| 2687 PPARA  | LPL      | VLDLR    | LPL_VLDLR      |
| 2688 PPARA  | LPL      | LRP2     | LPL_LRP2       |
| 2689 PPARA  | LPL      | SDC1     | LPL_SDC1       |
| 2690 NFKB1  | LPL      | LRP1     | LPL_LRP1       |
| 2691 NFKB1  | LPL      | CD44     | LPL_CD44       |
| 2692 NFKB1  | LPL      | GPIHBP1  | LPL_GPIHBP1    |
| 2693 NFKB1  | LPL      | VLDLR    | LPL_VLDLR      |
| 2694 NFKB1  | LPL      | LRP2     | LPL_LRP2       |
| 2695 NFKB1  | LPL      | SDC1     | LPL_SDC1       |
| 2696 SP3    | LPL      | LRP1     | LPL_LRP1       |
| 2697 SP3    | LPL      | CD44     | LPL_CD44       |
| 2698 SP3    | LPL      | GPIHBP1  | LPL_GPIHBP1    |
| 2699 SP3    | LPL      | VLDLR    | LPL_VLDLR      |
| 2700 SP3    | LPL      | LRP2     | LPL_LRP2       |
| 2701 SP3    | LPL      | SDC1     | LPL_SDC1       |
| 2702 RELA   | LPL      | LRP1     | LPL_LRP1       |
| 2703 RELA   | LPL      | CD44     | LPL_CD44       |
| 2704 RELA   | LPL      | GPIHBP1  | LPL_GPIHBP1    |
| 2705 RELA   | LPL      | VLDLR    | LPL_VLDLR      |
| 2706 RELA   | LPL      | LRP2     | LPL_LRP2       |
| 2707 RELA   | LPL      | SDC1     | LPL_SDC1       |
| 2708 PPARD  | LPL      | LRP1     | LPL_LRP1       |
| 2709 PPARD  | LPL      | CD44     | LPL_CD44       |
| 2710 PPARD  | LPL      | GPIHBP1  | LPL_GPIHBP1    |
| 2711 PPARD  | LPL      | VLDLR    | LPL_VLDLR      |
| 2712 PPARD  | LPL      | LRP2     | LPL_LRP2       |
| 2713 PPARD  | LPL      | SDC1     | LPL_SDC1       |
| 2714 SP1    | LPL      | LRP1     | LPL_LRP1       |
| 2715 SP1    | LPL      | CD44     | LPL_CD44       |
| 2716 SP1    | LPL      | GPIHBP1  | LPL_GPIHBP1    |
| 2717 SP1    | LPL      | VLDLR    | LPL_VLDLR      |
| 2718 SP1    | LPL      | LRP2     | LPL_LRP2       |
| 2719 SP1    | LPL      | SDC1     | LPL_SDC1       |
| 2720 MSC    | LTA      | LTBR     | LTA_LTBR       |
| 2721 MSC    | LTA      | TNFRSF1B | LTA_TNFRSF1B   |
| 2722 NFAT5  | LTB      | LTBR     | LTB_LTBR       |
| 2723 NFAT5  | LTB      | CD40     | LTB_CD40       |
| 2724 NFAT5  | LTB      | TNFRSF1A | LTB_TNFRSF1A   |
| 2725 EGR1   | LTB      | LTBR     | LTB_LTBR       |

|              |         |          |               |
|--------------|---------|----------|---------------|
| 2726 EGR1    | LTB     | CD40     | LTB_CD40      |
| 2727 EGR1    | LTB     | TNFRSF1A | LTB_TNFRSF1A  |
| 2728 CEBPE   | LTF     | LRP1     | LTF_LRP1      |
| 2729 SP1     | LTF     | LRP1     | LTF_LRP1      |
| 2730 SP1     | LYZ     | ITGAL    | LYZ_ITGAL     |
| 2731 RELA    | MADCAM1 | CD44     | MADCAM1_CD44  |
| 2732 RELA    | MADCAM1 | ITGA4    | MADCAM1_ITGA4 |
| 2733 BTF3    | MADCAM1 | CD44     | MADCAM1_CD44  |
| 2734 BTF3    | MADCAM1 | ITGA4    | MADCAM1_ITGA4 |
| 2735 NFKB1   | MADCAM1 | CD44     | MADCAM1_CD44  |
| 2736 NFKB1   | MADCAM1 | ITGA4    | MADCAM1_ITGA4 |
| 2737 NFIC    | MATN1   | ITGB1    | MATN1_ITGB1   |
| 2738 NFKBIA  | MMP1    | CD44     | MMP1_CD44     |
| 2739 PAX5    | MMP1    | CD44     | MMP1_CD44     |
| 2740 GATA3   | MMP1    | CD44     | MMP1_CD44     |
| 2741 TWIST1  | MMP1    | CD44     | MMP1_CD44     |
| 2742 TP53    | MMP1    | CD44     | MMP1_CD44     |
| 2743 PPARG   | MMP1    | CD44     | MMP1_CD44     |
| 2744 FOS     | MMP1    | CD44     | MMP1_CD44     |
| 2745 JUN     | MMP1    | CD44     | MMP1_CD44     |
| 2746 FLI1    | MMP1    | CD44     | MMP1_CD44     |
| 2747 RELA    | MMP1    | CD44     | MMP1_CD44     |
| 2748 ETS1    | MMP1    | CD44     | MMP1_CD44     |
| 2749 NR4A2   | MMP1    | CD44     | MMP1_CD44     |
| 2750 ETS2    | MMP1    | CD44     | MMP1_CD44     |
| 2751 CEBPB   | MMP1    | CD44     | MMP1_CD44     |
| 2752 ETV3    | MMP1    | CD44     | MMP1_CD44     |
| 2753 FOSL1   | MMP1    | CD44     | MMP1_CD44     |
| 2754 STAT3   | MMP1    | CD44     | MMP1_CD44     |
| 2755 ETV4    | MMP1    | CD44     | MMP1_CD44     |
| 2756 NFKB1   | MMP1    | CD44     | MMP1_CD44     |
| 2757 BACH1   | MMP1    | CD44     | MMP1_CD44     |
| 2758 CITED2  | MMP1    | CD44     | MMP1_CD44     |
| 2759 RFWD2   | MMP1    | CD44     | MMP1_CD44     |
| 2760 ZNF410  | MMP1    | CD44     | MMP1_CD44     |
| 2761 MAZ     | MMP1    | CD44     | MMP1_CD44     |
| 2762 JUN     | MMP12   | PLAUR    | MMP12_PLAUR   |
| 2763 RELA    | MMP12   | PLAUR    | MMP12_PLAUR   |
| 2764 YBX1    | MMP13   | LRP1     | MMP13_LRP1    |
| 2765 RUNX2   | MMP13   | LRP1     | MMP13_LRP1    |
| 2766 MAF     | MMP13   | LRP1     | MMP13_LRP1    |
| 2767 ESR1    | MMP13   | LRP1     | MMP13_LRP1    |
| 2768 ETS1    | MMP13   | LRP1     | MMP13_LRP1    |
| 2769 HDAC4   | MMP13   | LRP1     | MMP13_LRP1    |
| 2770 HDAC9   | MMP13   | LRP1     | MMP13_LRP1    |
| 2771 JUN     | MMP13   | LRP1     | MMP13_LRP1    |
| 2772 CITED2  | MMP13   | LRP1     | MMP13_LRP1    |
| 2773 RELA    | MMP13   | LRP1     | MMP13_LRP1    |
| 2774 NFKB1   | MMP13   | LRP1     | MMP13_LRP1    |
| 2775 ING2    | MMP13   | LRP1     | MMP13_LRP1    |
| 2776 STAT1   | MMP13   | LRP1     | MMP13_LRP1    |
| 2777 HTATIP2 | MMP2    | SDC2     | MMP2_SDC2     |
| 2778 SRF     | MMP2    | SDC2     | MMP2_SDC2     |
| 2779 HDAC3   | MMP2    | SDC2     | MMP2_SDC2     |
| 2780 ATF2    | MMP2    | SDC2     | MMP2_SDC2     |
| 2781 STAT3   | MMP2    | SDC2     | MMP2_SDC2     |
| 2782 NR4A1   | MMP2    | SDC2     | MMP2_SDC2     |
| 2783 HOXB7   | MMP2    | SDC2     | MMP2_SDC2     |



|      |        |      |       |            |
|------|--------|------|-------|------------|
| 2784 | TP53   | MMP2 | SDC2  | MMP2_SDC2  |
| 2785 | KLF4   | MMP2 | SDC2  | MMP2_SDC2  |
| 2786 | EZH2   | MMP2 | SDC2  | MMP2_SDC2  |
| 2787 | TWIST1 | MMP2 | SDC2  | MMP2_SDC2  |
| 2788 | YBX1   | MMP2 | SDC2  | MMP2_SDC2  |
| 2789 | SP3    | MMP2 | SDC2  | MMP2_SDC2  |
| 2790 | ATF3   | MMP2 | SDC2  | MMP2_SDC2  |
| 2791 | SSX2   | MMP2 | SDC2  | MMP2_SDC2  |
| 2792 | JUN    | MMP2 | SDC2  | MMP2_SDC2  |
| 2793 | CREB1  | MMP2 | SDC2  | MMP2_SDC2  |
| 2794 | HIF1A  | MMP2 | SDC2  | MMP2_SDC2  |
| 2795 | RUNX2  | MMP2 | SDC2  | MMP2_SDC2  |
| 2796 | CEBPE  | MMP2 | SDC2  | MMP2_SDC2  |
| 2797 | TFAP2C | MMP2 | SDC2  | MMP2_SDC2  |
| 2798 | SP1    | MMP2 | SDC2  | MMP2_SDC2  |
| 2799 | ETV4   | MMP2 | SDC2  | MMP2_SDC2  |
| 2800 | ETS2   | MMP2 | SDC2  | MMP2_SDC2  |
| 2801 | MZF1   | MMP2 | SDC2  | MMP2_SDC2  |
| 2802 | PAX6   | MMP2 | SDC2  | MMP2_SDC2  |
| 2803 | MSC    | MMP2 | SDC2  | MMP2_SDC2  |
| 2804 | ETV5   | MMP2 | SDC2  | MMP2_SDC2  |
| 2805 | RELA   | MMP2 | SDC2  | MMP2_SDC2  |
| 2806 | TWIST2 | MMP2 | SDC2  | MMP2_SDC2  |
| 2807 | NFKB1  | MMP2 | SDC2  | MMP2_SDC2  |
| 2808 | TFAP2A | MMP2 | SDC2  | MMP2_SDC2  |
| 2809 | CTNNB1 | MMP7 | CDH6  | MMP7_CDH6  |
| 2810 | CTNNB1 | MMP7 | ERBB4 | MMP7_ERBB4 |
| 2811 | CTNNB1 | MMP7 | CD44  | MMP7_CD44  |
| 2812 | CTNNB1 | MMP7 | CD151 | MMP7_CD151 |
| 2813 | STAT3  | MMP7 | CDH6  | MMP7_CDH6  |
| 2814 | STAT3  | MMP7 | ERBB4 | MMP7_ERBB4 |
| 2815 | STAT3  | MMP7 | CD44  | MMP7_CD44  |
| 2816 | STAT3  | MMP7 | CD151 | MMP7_CD151 |
| 2817 | JUN    | MMP7 | CDH6  | MMP7_CDH6  |
| 2818 | JUN    | MMP7 | ERBB4 | MMP7_ERBB4 |
| 2819 | JUN    | MMP7 | CD44  | MMP7_CD44  |
| 2820 | JUN    | MMP7 | CD151 | MMP7_CD151 |
| 2821 | FOXA2  | MMP7 | CDH6  | MMP7_CDH6  |
| 2822 | FOXA2  | MMP7 | ERBB4 | MMP7_ERBB4 |
| 2823 | FOXA2  | MMP7 | CD44  | MMP7_CD44  |
| 2824 | FOXA2  | MMP7 | CD151 | MMP7_CD151 |
| 2825 | HNF4A  | MMP7 | CDH6  | MMP7_CDH6  |
| 2826 | HNF4A  | MMP7 | ERBB4 | MMP7_ERBB4 |
| 2827 | HNF4A  | MMP7 | CD44  | MMP7_CD44  |
| 2828 | HNF4A  | MMP7 | CD151 | MMP7_CD151 |
| 2829 | ETV4   | MMP7 | CDH6  | MMP7_CDH6  |
| 2830 | ETV4   | MMP7 | ERBB4 | MMP7_ERBB4 |
| 2831 | ETV4   | MMP7 | CD44  | MMP7_CD44  |
| 2832 | ETV4   | MMP7 | CD151 | MMP7_CD151 |
| 2833 | NCOA3  | MMP7 | CDH6  | MMP7_CDH6  |
| 2834 | NCOA3  | MMP7 | ERBB4 | MMP7_ERBB4 |
| 2835 | NCOA3  | MMP7 | CD44  | MMP7_CD44  |
| 2836 | NCOA3  | MMP7 | CD151 | MMP7_CD151 |
| 2837 | FOS    | MMP7 | CDH6  | MMP7_CDH6  |
| 2838 | FOS    | MMP7 | ERBB4 | MMP7_ERBB4 |
| 2839 | FOS    | MMP7 | CD44  | MMP7_CD44  |
| 2840 | FOS    | MMP7 | CD151 | MMP7_CD151 |
| 2841 | LEF1   | MMP7 | CDH6  | MMP7_CDH6  |

|      |       |      |       |            |
|------|-------|------|-------|------------|
| 2842 | LEF1  | MMP7 | ERBB4 | MMP7_ERBB4 |
| 2843 | LEF1  | MMP7 | CD44  | MMP7_CD44  |
| 2844 | LEF1  | MMP7 | CD151 | MMP7_CD151 |
| 2845 | SP1   | MMP9 | LRP1  | MMP9_LRP1  |
| 2846 | SP1   | MMP9 | CD44  | MMP9_CD44  |
| 2847 | SP1   | MMP9 | ITGB2 | MMP9_ITGB2 |
| 2848 | SP1   | MMP9 | ITGAM | MMP9_ITGAM |
| 2849 | SMAD3 | MMP9 | LRP1  | MMP9_LRP1  |
| 2850 | SMAD3 | MMP9 | CD44  | MMP9_CD44  |
| 2851 | SMAD3 | MMP9 | ITGB2 | MMP9_ITGB2 |
| 2852 | SMAD3 | MMP9 | ITGAM | MMP9_ITGAM |
| 2853 | SPDEF | MMP9 | LRP1  | MMP9_LRP1  |
| 2854 | SPDEF | MMP9 | CD44  | MMP9_CD44  |
| 2855 | SPDEF | MMP9 | ITGB2 | MMP9_ITGB2 |
| 2856 | SPDEF | MMP9 | ITGAM | MMP9_ITGAM |
| 2857 | IRF1  | MMP9 | LRP1  | MMP9_LRP1  |
| 2858 | IRF1  | MMP9 | CD44  | MMP9_CD44  |
| 2859 | IRF1  | MMP9 | ITGB2 | MMP9_ITGB2 |
| 2860 | IRF1  | MMP9 | ITGAM | MMP9_ITGAM |
| 2861 | ETS2  | MMP9 | LRP1  | MMP9_LRP1  |
| 2862 | ETS2  | MMP9 | CD44  | MMP9_CD44  |
| 2863 | ETS2  | MMP9 | ITGB2 | MMP9_ITGB2 |
| 2864 | ETS2  | MMP9 | ITGAM | MMP9_ITGAM |
| 2865 | CIITA | MMP9 | LRP1  | MMP9_LRP1  |
| 2866 | CIITA | MMP9 | CD44  | MMP9_CD44  |
| 2867 | CIITA | MMP9 | ITGB2 | MMP9_ITGB2 |
| 2868 | CIITA | MMP9 | ITGAM | MMP9_ITGAM |
| 2869 | KLF6  | MMP9 | LRP1  | MMP9_LRP1  |
| 2870 | KLF6  | MMP9 | CD44  | MMP9_CD44  |
| 2871 | KLF6  | MMP9 | ITGB2 | MMP9_ITGB2 |
| 2872 | KLF6  | MMP9 | ITGAM | MMP9_ITGAM |
| 2873 | SIRT1 | MMP9 | LRP1  | MMP9_LRP1  |
| 2874 | SIRT1 | MMP9 | CD44  | MMP9_CD44  |
| 2875 | SIRT1 | MMP9 | ITGB2 | MMP9_ITGB2 |
| 2876 | SIRT1 | MMP9 | ITGAM | MMP9_ITGAM |
| 2877 | RELA  | MMP9 | LRP1  | MMP9_LRP1  |
| 2878 | RELA  | MMP9 | CD44  | MMP9_CD44  |
| 2879 | RELA  | MMP9 | ITGB2 | MMP9_ITGB2 |
| 2880 | RELA  | MMP9 | ITGAM | MMP9_ITGAM |
| 2881 | KLF5  | MMP9 | LRP1  | MMP9_LRP1  |
| 2882 | KLF5  | MMP9 | CD44  | MMP9_CD44  |
| 2883 | KLF5  | MMP9 | ITGB2 | MMP9_ITGB2 |
| 2884 | KLF5  | MMP9 | ITGAM | MMP9_ITGAM |
| 2885 | NFKB1 | MMP9 | LRP1  | MMP9_LRP1  |
| 2886 | NFKB1 | MMP9 | CD44  | MMP9_CD44  |
| 2887 | NFKB1 | MMP9 | ITGB2 | MMP9_ITGB2 |
| 2888 | NFKB1 | MMP9 | ITGAM | MMP9_ITGAM |
| 2889 | ELF4  | MMP9 | LRP1  | MMP9_LRP1  |
| 2890 | ELF4  | MMP9 | CD44  | MMP9_CD44  |
| 2891 | ELF4  | MMP9 | ITGB2 | MMP9_ITGB2 |
| 2892 | ELF4  | MMP9 | ITGAM | MMP9_ITGAM |
| 2893 | STAT3 | MMP9 | LRP1  | MMP9_LRP1  |
| 2894 | STAT3 | MMP9 | CD44  | MMP9_CD44  |
| 2895 | STAT3 | MMP9 | ITGB2 | MMP9_ITGB2 |
| 2896 | STAT3 | MMP9 | ITGAM | MMP9_ITGAM |
| 2897 | HDAC1 | MMP9 | LRP1  | MMP9_LRP1  |
| 2898 | HDAC1 | MMP9 | CD44  | MMP9_CD44  |
| 2899 | HDAC1 | MMP9 | ITGB2 | MMP9_ITGB2 |

|             |      |       |            |
|-------------|------|-------|------------|
| 2900 HDAC1  | MMP9 | ITGAM | MMP9_ITGAM |
| 2901 ELF3   | MMP9 | LRP1  | MMP9_LRP1  |
| 2902 ELF3   | MMP9 | CD44  | MMP9_CD44  |
| 2903 ELF3   | MMP9 | ITGB2 | MMP9_ITGB2 |
| 2904 ELF3   | MMP9 | ITGAM | MMP9_ITGAM |
| 2905 FOS    | MMP9 | LRP1  | MMP9_LRP1  |
| 2906 FOS    | MMP9 | CD44  | MMP9_CD44  |
| 2907 FOS    | MMP9 | ITGB2 | MMP9_ITGB2 |
| 2908 FOS    | MMP9 | ITGAM | MMP9_ITGAM |
| 2909 PPARA  | MMP9 | LRP1  | MMP9_LRP1  |
| 2910 PPARA  | MMP9 | CD44  | MMP9_CD44  |
| 2911 PPARA  | MMP9 | ITGB2 | MMP9_ITGB2 |
| 2912 PPARA  | MMP9 | ITGAM | MMP9_ITGAM |
| 2913 KLF8   | MMP9 | LRP1  | MMP9_LRP1  |
| 2914 KLF8   | MMP9 | CD44  | MMP9_CD44  |
| 2915 KLF8   | MMP9 | ITGB2 | MMP9_ITGB2 |
| 2916 KLF8   | MMP9 | ITGAM | MMP9_ITGAM |
| 2917 TFAP2A | MMP9 | LRP1  | MMP9_LRP1  |
| 2918 TFAP2A | MMP9 | CD44  | MMP9_CD44  |
| 2919 TFAP2A | MMP9 | ITGB2 | MMP9_ITGB2 |
| 2920 TFAP2A | MMP9 | ITGAM | MMP9_ITGAM |
| 2921 RUNX3  | MMP9 | LRP1  | MMP9_LRP1  |
| 2922 RUNX3  | MMP9 | CD44  | MMP9_CD44  |
| 2923 RUNX3  | MMP9 | ITGB2 | MMP9_ITGB2 |
| 2924 RUNX3  | MMP9 | ITGAM | MMP9_ITGAM |
| 2925 JUN    | MMP9 | LRP1  | MMP9_LRP1  |
| 2926 JUN    | MMP9 | CD44  | MMP9_CD44  |
| 2927 JUN    | MMP9 | ITGB2 | MMP9_ITGB2 |
| 2928 JUN    | MMP9 | ITGAM | MMP9_ITGAM |
| 2929 MAL    | MMP9 | LRP1  | MMP9_LRP1  |
| 2930 MAL    | MMP9 | CD44  | MMP9_CD44  |
| 2931 MAL    | MMP9 | ITGB2 | MMP9_ITGB2 |
| 2932 MAL    | MMP9 | ITGAM | MMP9_ITGAM |
| 2933 STAT1  | MMP9 | LRP1  | MMP9_LRP1  |
| 2934 STAT1  | MMP9 | CD44  | MMP9_CD44  |
| 2935 STAT1  | MMP9 | ITGB2 | MMP9_ITGB2 |
| 2936 STAT1  | MMP9 | ITGAM | MMP9_ITGAM |
| 2937 PPARG  | MMP9 | LRP1  | MMP9_LRP1  |
| 2938 PPARG  | MMP9 | CD44  | MMP9_CD44  |
| 2939 PPARG  | MMP9 | ITGB2 | MMP9_ITGB2 |
| 2940 PPARG  | MMP9 | ITGAM | MMP9_ITGAM |
| 2941 MAZ    | MMP9 | LRP1  | MMP9_LRP1  |
| 2942 MAZ    | MMP9 | CD44  | MMP9_CD44  |
| 2943 MAZ    | MMP9 | ITGB2 | MMP9_ITGB2 |
| 2944 MAZ    | MMP9 | ITGAM | MMP9_ITGAM |
| 2945 SP2    | MMP9 | LRP1  | MMP9_LRP1  |
| 2946 SP2    | MMP9 | CD44  | MMP9_CD44  |
| 2947 SP2    | MMP9 | ITGB2 | MMP9_ITGB2 |
| 2948 SP2    | MMP9 | ITGAM | MMP9_ITGAM |
| 2949 SNAI2  | MMP9 | LRP1  | MMP9_LRP1  |
| 2950 SNAI2  | MMP9 | CD44  | MMP9_CD44  |
| 2951 SNAI2  | MMP9 | ITGB2 | MMP9_ITGB2 |
| 2952 SNAI2  | MMP9 | ITGAM | MMP9_ITGAM |
| 2953 EP300  | MMP9 | LRP1  | MMP9_LRP1  |
| 2954 EP300  | MMP9 | CD44  | MMP9_CD44  |
| 2955 EP300  | MMP9 | ITGB2 | MMP9_ITGB2 |
| 2956 EP300  | MMP9 | ITGAM | MMP9_ITGAM |
| 2957 IKBKB  | MMP9 | LRP1  | MMP9_LRP1  |

|      |        |       |         |             |
|------|--------|-------|---------|-------------|
| 2958 | IKBKB  | MMP9  | CD44    | MMP9_CD44   |
| 2959 | IKBKB  | MMP9  | ITGB2   | MMP9_ITGB2  |
| 2960 | IKBKB  | MMP9  | ITGAM   | MMP9_ITGAM  |
| 2961 | ETS1   | MMP9  | LRP1    | MMP9_LRP1   |
| 2962 | ETS1   | MMP9  | CD44    | MMP9_CD44   |
| 2963 | ETS1   | MMP9  | ITGB2   | MMP9_ITGB2  |
| 2964 | ETS1   | MMP9  | ITGAM   | MMP9_ITGAM  |
| 2965 | SRF    | MMP9  | LRP1    | MMP9_LRP1   |
| 2966 | SRF    | MMP9  | CD44    | MMP9_CD44   |
| 2967 | SRF    | MMP9  | ITGB2   | MMP9_ITGB2  |
| 2968 | SRF    | MMP9  | ITGAM   | MMP9_ITGAM  |
| 2969 | MTA1   | MMP9  | LRP1    | MMP9_LRP1   |
| 2970 | MTA1   | MMP9  | CD44    | MMP9_CD44   |
| 2971 | MTA1   | MMP9  | ITGB2   | MMP9_ITGB2  |
| 2972 | MTA1   | MMP9  | ITGAM   | MMP9_ITGAM  |
| 2973 | NFKBIA | MMP9  | LRP1    | MMP9_LRP1   |
| 2974 | NFKBIA | MMP9  | CD44    | MMP9_CD44   |
| 2975 | NFKBIA | MMP9  | ITGB2   | MMP9_ITGB2  |
| 2976 | NFKBIA | MMP9  | ITGAM   | MMP9_ITGAM  |
| 2977 | MYC    | MST1  | MST1R   | MST1_MST1R  |
| 2978 | EZH2   | MST1  | MST1R   | MST1_MST1R  |
| 2979 | JUN    | NAMPT | INSR    | NAMPT_INSR  |
| 2980 | CLOCK  | NAMPT | INSR    | NAMPT_INSR  |
| 2981 | NFKB1  | NAMPT | INSR    | NAMPT_INSR  |
| 2982 | RELA   | NAMPT | INSR    | NAMPT_INSR  |
| 2983 | RELA   | NCAM1 | PTPRA   | NCAM1_PTPRA |
| 2984 | RUNX1  | NCAM1 | PTPRA   | NCAM1_PTPRA |
| 2985 | PAX8   | NCAM1 | PTPRA   | NCAM1_PTPRA |
| 2986 | PAX2   | NCAM1 | PTPRA   | NCAM1_PTPRA |
| 2987 | NFKB1  | NCAM1 | PTPRA   | NCAM1_PTPRA |
| 2988 | SOX4   | NCAM1 | PTPRA   | NCAM1_PTPRA |
| 2989 | IRF9   | NCAM1 | PTPRA   | NCAM1_PTPRA |
| 2990 | ING4   | NGF   | NGFRAP1 | NGF_NGFRAP1 |
| 2991 | JUN    | NGF   | NGFRAP1 | NGF_NGFRAP1 |
| 2992 | FOS    | NGF   | NGFRAP1 | NGF_NGFRAP1 |
| 2993 | ELK1   | PDGFB | LRP1    | PDGFB_LRP1  |
| 2994 | FOXO1  | PDGFB | LRP1    | PDGFB_LRP1  |
| 2995 | EGR1   | PDGFB | LRP1    | PDGFB_LRP1  |
| 2996 | SP1    | PDGFB | LRP1    | PDGFB_LRP1  |
| 2997 | USF1   | PF4   | THBD    | PF4_THBD    |
| 2998 | USF1   | PF4   | CXCR3   | PF4_CXCR3   |
| 2999 | PBX2   | PF4   | THBD    | PF4_THBD    |
| 3000 | PBX2   | PF4   | CXCR3   | PF4_CXCR3   |
| 3001 | ETS1   | PF4   | THBD    | PF4_THBD    |
| 3002 | ETS1   | PF4   | CXCR3   | PF4_CXCR3   |
| 3003 | RUNX1  | PF4   | THBD    | PF4_THBD    |
| 3004 | RUNX1  | PF4   | CXCR3   | PF4_CXCR3   |
| 3005 | MEIS1  | PF4   | THBD    | PF4_THBD    |
| 3006 | MEIS1  | PF4   | CXCR3   | PF4_CXCR3   |
| 3007 | FLI1   | PF4   | THBD    | PF4_THBD    |
| 3008 | FLI1   | PF4   | CXCR3   | PF4_CXCR3   |
| 3009 | PBX1   | PF4   | THBD    | PF4_THBD    |
| 3010 | PBX1   | PF4   | CXCR3   | PF4_CXCR3   |
| 3011 | USF2   | PF4   | THBD    | PF4_THBD    |
| 3012 | USF2   | PF4   | CXCR3   | PF4_CXCR3   |
| 3013 | PKNOX1 | PF4   | THBD    | PF4_THBD    |
| 3014 | PKNOX1 | PF4   | CXCR3   | PF4_CXCR3   |
| 3015 | TIAL1  | PF4   | THBD    | PF4_THBD    |

|             |      |       |            |
|-------------|------|-------|------------|
| 3016 TIAL1  | PF4  | CXCR3 | PF4_CXCR3  |
| 3017 GATA1  | PF4  | THBD  | PF4_THBD   |
| 3018 GATA1  | PF4  | CXCR3 | PF4_CXCR3  |
| 3019 AR     | PIP  | CD4   | PIP_CD4    |
| 3020 RUNX2  | PIP  | CD4   | PIP_CD4    |
| 3021 ZBTB7A | PKM  | CD44  | PKM_CD44   |
| 3022 CREM   | PLAT | LRP1  | PLAT_LRP1  |
| 3023 CREM   | PLAT | ITGB2 | PLAT_ITGB2 |
| 3024 CREM   | PLAT | ITGAM | PLAT_ITGAM |
| 3025 SP1    | PLAT | LRP1  | PLAT_LRP1  |
| 3026 SP1    | PLAT | ITGB2 | PLAT_ITGB2 |
| 3027 SP1    | PLAT | ITGAM | PLAT_ITGAM |
| 3028 NF1    | PLAT | LRP1  | PLAT_LRP1  |
| 3029 NF1    | PLAT | ITGB2 | PLAT_ITGB2 |
| 3030 NF1    | PLAT | ITGAM | PLAT_ITGAM |
| 3031 SP3    | PLAT | LRP1  | PLAT_LRP1  |
| 3032 SP3    | PLAT | ITGB2 | PLAT_ITGB2 |
| 3033 SP3    | PLAT | ITGAM | PLAT_ITGAM |
| 3034 ATF2   | PLAT | LRP1  | PLAT_LRP1  |
| 3035 ATF2   | PLAT | ITGB2 | PLAT_ITGB2 |
| 3036 ATF2   | PLAT | ITGAM | PLAT_ITGAM |
| 3037 CREB1  | PLAT | LRP1  | PLAT_LRP1  |
| 3038 CREB1  | PLAT | ITGB2 | PLAT_ITGB2 |
| 3039 CREB1  | PLAT | ITGAM | PLAT_ITGAM |
| 3040 JUN    | PLAT | LRP1  | PLAT_LRP1  |
| 3041 JUN    | PLAT | ITGB2 | PLAT_ITGB2 |
| 3042 JUN    | PLAT | ITGAM | PLAT_ITGAM |
| 3043 JUND   | PLAT | LRP1  | PLAT_LRP1  |
| 3044 JUND   | PLAT | ITGB2 | PLAT_ITGB2 |
| 3045 JUND   | PLAT | ITGAM | PLAT_ITGAM |
| 3046 POU2F1 | PLAU | ITGB1 | PLAU_ITGB1 |
| 3047 POU2F1 | PLAU | LRP1  | PLAU_LRP1  |
| 3048 POU2F1 | PLAU | ST14  | PLAU_ST14  |
| 3049 POU2F1 | PLAU | PLAUR | PLAU_PLAUR |
| 3050 POU2F1 | PLAU | ITGAM | PLAU_ITGAM |
| 3051 POU2F1 | PLAU | ITGA3 | PLAU_ITGA3 |
| 3052 POU2F1 | PLAU | ITGB2 | PLAU_ITGB2 |
| 3053 NFKB1  | PLAU | ITGB1 | PLAU_ITGB1 |
| 3054 NFKB1  | PLAU | LRP1  | PLAU_LRP1  |
| 3055 NFKB1  | PLAU | ST14  | PLAU_ST14  |
| 3056 NFKB1  | PLAU | PLAUR | PLAU_PLAUR |
| 3057 NFKB1  | PLAU | ITGAM | PLAU_ITGAM |
| 3058 NFKB1  | PLAU | ITGA3 | PLAU_ITGA3 |
| 3059 NFKB1  | PLAU | ITGB2 | PLAU_ITGB2 |
| 3060 SRF    | PLAU | ITGB1 | PLAU_ITGB1 |
| 3061 SRF    | PLAU | LRP1  | PLAU_LRP1  |
| 3062 SRF    | PLAU | ST14  | PLAU_ST14  |
| 3063 SRF    | PLAU | PLAUR | PLAU_PLAUR |
| 3064 SRF    | PLAU | ITGAM | PLAU_ITGAM |
| 3065 SRF    | PLAU | ITGA3 | PLAU_ITGA3 |
| 3066 SRF    | PLAU | ITGB2 | PLAU_ITGB2 |
| 3067 ATF4   | PLAU | ITGB1 | PLAU_ITGB1 |
| 3068 ATF4   | PLAU | LRP1  | PLAU_LRP1  |
| 3069 ATF4   | PLAU | ST14  | PLAU_ST14  |
| 3070 ATF4   | PLAU | PLAUR | PLAU_PLAUR |
| 3071 ATF4   | PLAU | ITGAM | PLAU_ITGAM |
| 3072 ATF4   | PLAU | ITGA3 | PLAU_ITGA3 |
| 3073 ATF4   | PLAU | ITGB2 | PLAU_ITGB2 |

|            |      |       |            |
|------------|------|-------|------------|
| 3074 JUN   | PLAU | ITGB1 | PLAU_ITGB1 |
| 3075 JUN   | PLAU | LRP1  | PLAU_LRP1  |
| 3076 JUN   | PLAU | ST14  | PLAU_ST14  |
| 3077 JUN   | PLAU | PLAUR | PLAU_PLAUR |
| 3078 JUN   | PLAU | ITGAM | PLAU_ITGAM |
| 3079 JUN   | PLAU | ITGA3 | PLAU_ITGA3 |
| 3080 JUN   | PLAU | ITGB2 | PLAU_ITGB2 |
| 3081 HIF1A | PLAU | ITGB1 | PLAU_ITGB1 |
| 3082 HIF1A | PLAU | LRP1  | PLAU_LRP1  |
| 3083 HIF1A | PLAU | ST14  | PLAU_ST14  |
| 3084 HIF1A | PLAU | PLAUR | PLAU_PLAUR |
| 3085 HIF1A | PLAU | ITGAM | PLAU_ITGAM |
| 3086 HIF1A | PLAU | ITGA3 | PLAU_ITGA3 |
| 3087 HIF1A | PLAU | ITGB2 | PLAU_ITGB2 |
| 3088 SP1   | PLAU | ITGB1 | PLAU_ITGB1 |
| 3089 SP1   | PLAU | LRP1  | PLAU_LRP1  |
| 3090 SP1   | PLAU | ST14  | PLAU_ST14  |
| 3091 SP1   | PLAU | PLAUR | PLAU_PLAUR |
| 3092 SP1   | PLAU | ITGAM | PLAU_ITGAM |
| 3093 SP1   | PLAU | ITGA3 | PLAU_ITGA3 |
| 3094 SP1   | PLAU | ITGB2 | PLAU_ITGB2 |
| 3095 RFWD2 | PLAU | ITGB1 | PLAU_ITGB1 |
| 3096 RFWD2 | PLAU | LRP1  | PLAU_LRP1  |
| 3097 RFWD2 | PLAU | ST14  | PLAU_ST14  |
| 3098 RFWD2 | PLAU | PLAUR | PLAU_PLAUR |
| 3099 RFWD2 | PLAU | ITGAM | PLAU_ITGAM |
| 3100 RFWD2 | PLAU | ITGA3 | PLAU_ITGA3 |
| 3101 RFWD2 | PLAU | ITGB2 | PLAU_ITGB2 |
| 3102 GATA6 | PLAU | ITGB1 | PLAU_ITGB1 |
| 3103 GATA6 | PLAU | LRP1  | PLAU_LRP1  |
| 3104 GATA6 | PLAU | ST14  | PLAU_ST14  |
| 3105 GATA6 | PLAU | PLAUR | PLAU_PLAUR |
| 3106 GATA6 | PLAU | ITGAM | PLAU_ITGAM |
| 3107 GATA6 | PLAU | ITGA3 | PLAU_ITGA3 |
| 3108 GATA6 | PLAU | ITGB2 | PLAU_ITGB2 |
| 3109 EGR1  | PLAU | ITGB1 | PLAU_ITGB1 |
| 3110 EGR1  | PLAU | LRP1  | PLAU_LRP1  |
| 3111 EGR1  | PLAU | ST14  | PLAU_ST14  |
| 3112 EGR1  | PLAU | PLAUR | PLAU_PLAUR |
| 3113 EGR1  | PLAU | ITGAM | PLAU_ITGAM |
| 3114 EGR1  | PLAU | ITGA3 | PLAU_ITGA3 |
| 3115 EGR1  | PLAU | ITGB2 | PLAU_ITGB2 |
| 3116 ILF3  | PLAU | ITGB1 | PLAU_ITGB1 |
| 3117 ILF3  | PLAU | LRP1  | PLAU_LRP1  |
| 3118 ILF3  | PLAU | ST14  | PLAU_ST14  |
| 3119 ILF3  | PLAU | PLAUR | PLAU_PLAUR |
| 3120 ILF3  | PLAU | ITGAM | PLAU_ITGAM |
| 3121 ILF3  | PLAU | ITGA3 | PLAU_ITGA3 |
| 3122 ILF3  | PLAU | ITGB2 | PLAU_ITGB2 |
| 3123 RUNX2 | PLAU | ITGB1 | PLAU_ITGB1 |
| 3124 RUNX2 | PLAU | LRP1  | PLAU_LRP1  |
| 3125 RUNX2 | PLAU | ST14  | PLAU_ST14  |
| 3126 RUNX2 | PLAU | PLAUR | PLAU_PLAUR |
| 3127 RUNX2 | PLAU | ITGAM | PLAU_ITGAM |
| 3128 RUNX2 | PLAU | ITGA3 | PLAU_ITGA3 |
| 3129 RUNX2 | PLAU | ITGB2 | PLAU_ITGB2 |
| 3130 CREB1 | PLAU | ITGB1 | PLAU_ITGB1 |
| 3131 CREB1 | PLAU | LRP1  | PLAU_LRP1  |

|              |       |        |            |
|--------------|-------|--------|------------|
| 3132 CREB1   | PLAU  | ST14   | PLAU_ST14  |
| 3133 CREB1   | PLAU  | PLAUR  | PLAU_PLAUR |
| 3134 CREB1   | PLAU  | ITGAM  | PLAU_ITGAM |
| 3135 CREB1   | PLAU  | ITGA3  | PLAU_ITGA3 |
| 3136 CREB1   | PLAU  | ITGB2  | PLAU_ITGB2 |
| 3137 ETS1    | PLAU  | ITGB1  | PLAU_ITGB1 |
| 3138 ETS1    | PLAU  | LRP1   | PLAU_LRP1  |
| 3139 ETS1    | PLAU  | ST14   | PLAU_ST14  |
| 3140 ETS1    | PLAU  | PLAUR  | PLAU_PLAUR |
| 3141 ETS1    | PLAU  | ITGAM  | PLAU_ITGAM |
| 3142 ETS1    | PLAU  | ITGA3  | PLAU_ITGA3 |
| 3143 ETS1    | PLAU  | ITGB2  | PLAU_ITGB2 |
| 3144 ATF2    | PLAU  | ITGB1  | PLAU_ITGB1 |
| 3145 ATF2    | PLAU  | LRP1   | PLAU_LRP1  |
| 3146 ATF2    | PLAU  | ST14   | PLAU_ST14  |
| 3147 ATF2    | PLAU  | PLAUR  | PLAU_PLAUR |
| 3148 ATF2    | PLAU  | ITGAM  | PLAU_ITGAM |
| 3149 ATF2    | PLAU  | ITGA3  | PLAU_ITGA3 |
| 3150 ATF2    | PLAU  | ITGB2  | PLAU_ITGB2 |
| 3151 RELA    | PLAU  | ITGB1  | PLAU_ITGB1 |
| 3152 RELA    | PLAU  | LRP1   | PLAU_LRP1  |
| 3153 RELA    | PLAU  | ST14   | PLAU_ST14  |
| 3154 RELA    | PLAU  | PLAUR  | PLAU_PLAUR |
| 3155 RELA    | PLAU  | ITGAM  | PLAU_ITGAM |
| 3156 RELA    | PLAU  | ITGA3  | PLAU_ITGA3 |
| 3157 RELA    | PLAU  | ITGB2  | PLAU_ITGB2 |
| 3158 FOS     | PLAU  | ITGB1  | PLAU_ITGB1 |
| 3159 FOS     | PLAU  | LRP1   | PLAU_LRP1  |
| 3160 FOS     | PLAU  | ST14   | PLAU_ST14  |
| 3161 FOS     | PLAU  | PLAUR  | PLAU_PLAUR |
| 3162 FOS     | PLAU  | ITGAM  | PLAU_ITGAM |
| 3163 FOS     | PLAU  | ITGA3  | PLAU_ITGA3 |
| 3164 FOS     | PLAU  | ITGB2  | PLAU_ITGB2 |
| 3165 RARA    | PLAU  | ITGB1  | PLAU_ITGB1 |
| 3166 RARA    | PLAU  | LRP1   | PLAU_LRP1  |
| 3167 RARA    | PLAU  | ST14   | PLAU_ST14  |
| 3168 RARA    | PLAU  | PLAUR  | PLAU_PLAUR |
| 3169 RARA    | PLAU  | ITGAM  | PLAU_ITGAM |
| 3170 RARA    | PLAU  | ITGA3  | PLAU_ITGA3 |
| 3171 RARA    | PLAU  | ITGB2  | PLAU_ITGB2 |
| 3172 HOXD3   | PLAU  | ITGB1  | PLAU_ITGB1 |
| 3173 HOXD3   | PLAU  | LRP1   | PLAU_LRP1  |
| 3174 HOXD3   | PLAU  | ST14   | PLAU_ST14  |
| 3175 HOXD3   | PLAU  | PLAUR  | PLAU_PLAUR |
| 3176 HOXD3   | PLAU  | ITGAM  | PLAU_ITGAM |
| 3177 HOXD3   | PLAU  | ITGA3  | PLAU_ITGA3 |
| 3178 HOXD3   | PLAU  | ITGB2  | PLAU_ITGB2 |
| 3179 SRF     | PLG   | ITGB2  | PLG_ITGB2  |
| 3180 SRF     | PLG   | ITGAM  | PLG_ITGAM  |
| 3181 SRF     | PLG   | PLAUR  | PLG_PLAUR  |
| 3182 SRF     | PLG   | ITGB1  | PLG_ITGB1  |
| 3183 SRF     | PLG   | PLGRKT | PLG_PLGRKT |
| 3184 NR1H4   | PLTP  | ABCA1  | PLTP_ABCA1 |
| 3185 SP1     | PNOC  | OPRL1  | PNOC_OPRL1 |
| 3186 VDR     | PODXL | SELL   | PODXL_SELL |
| 3187 WT1     | PODXL | SELL   | PODXL_SELL |
| 3188 ONECUT1 | PROC  | THBD   | PROC_THBD  |
| 3189 ONECUT1 | PROC  | ITGB2  | PROC_ITGB2 |

|      |         |       |       |             |
|------|---------|-------|-------|-------------|
| 3190 | ONECUT1 | PROC  | ITGAM | PROC_ITGAM  |
| 3191 | STAT3   | PROS1 | TYRO3 | PROS1_TYRO3 |
| 3192 | STAT3   | PROS1 | AXL   | PROS1_AXL   |
| 3193 | ELK1    | PSEN1 | CD44  | PSEN1_CD44  |
| 3194 | SP1     | PSEN1 | CD44  | PSEN1_CD44  |
| 3195 | CREB1   | PSEN1 | CD44  | PSEN1_CD44  |
| 3196 | CEBPB   | PTGS2 | CAV1  | PTGS2_CAV1  |
| 3197 | CEBPB   | PTGS2 | ALOX5 | PTGS2_ALOX5 |
| 3198 | PPARA   | PTGS2 | CAV1  | PTGS2_CAV1  |
| 3199 | PPARA   | PTGS2 | ALOX5 | PTGS2_ALOX5 |
| 3200 | HDAC4   | PTGS2 | CAV1  | PTGS2_CAV1  |
| 3201 | HDAC4   | PTGS2 | ALOX5 | PTGS2_ALOX5 |
| 3202 | SETBP1  | PTGS2 | CAV1  | PTGS2_CAV1  |
| 3203 | SETBP1  | PTGS2 | ALOX5 | PTGS2_ALOX5 |
| 3204 | STAT2   | PTGS2 | CAV1  | PTGS2_CAV1  |
| 3205 | STAT2   | PTGS2 | ALOX5 | PTGS2_ALOX5 |
| 3206 | STAT1   | PTGS2 | CAV1  | PTGS2_CAV1  |
| 3207 | STAT1   | PTGS2 | ALOX5 | PTGS2_ALOX5 |
| 3208 | USF1    | PTGS2 | CAV1  | PTGS2_CAV1  |
| 3209 | USF1    | PTGS2 | ALOX5 | PTGS2_ALOX5 |
| 3210 | ETV4    | PTGS2 | CAV1  | PTGS2_CAV1  |
| 3211 | ETV4    | PTGS2 | ALOX5 | PTGS2_ALOX5 |
| 3212 | PPARG   | PTGS2 | CAV1  | PTGS2_CAV1  |
| 3213 | PPARG   | PTGS2 | ALOX5 | PTGS2_ALOX5 |
| 3214 | ENO1    | PTGS2 | CAV1  | PTGS2_CAV1  |
| 3215 | ENO1    | PTGS2 | ALOX5 | PTGS2_ALOX5 |
| 3216 | EGR2    | PTGS2 | CAV1  | PTGS2_CAV1  |
| 3217 | EGR2    | PTGS2 | ALOX5 | PTGS2_ALOX5 |
| 3218 | ATF2    | PTGS2 | CAV1  | PTGS2_CAV1  |
| 3219 | ATF2    | PTGS2 | ALOX5 | PTGS2_ALOX5 |
| 3220 | ATF4    | PTGS2 | CAV1  | PTGS2_CAV1  |
| 3221 | ATF4    | PTGS2 | ALOX5 | PTGS2_ALOX5 |
| 3222 | APC     | PTGS2 | CAV1  | PTGS2_CAV1  |
| 3223 | APC     | PTGS2 | ALOX5 | PTGS2_ALOX5 |
| 3224 | JUNB    | PTGS2 | CAV1  | PTGS2_CAV1  |
| 3225 | JUNB    | PTGS2 | ALOX5 | PTGS2_ALOX5 |
| 3226 | DR1     | PTGS2 | CAV1  | PTGS2_CAV1  |
| 3227 | DR1     | PTGS2 | ALOX5 | PTGS2_ALOX5 |
| 3228 | HDAC1   | PTGS2 | CAV1  | PTGS2_CAV1  |
| 3229 | HDAC1   | PTGS2 | ALOX5 | PTGS2_ALOX5 |
| 3230 | CEBPD   | PTGS2 | CAV1  | PTGS2_CAV1  |
| 3231 | CEBPD   | PTGS2 | ALOX5 | PTGS2_ALOX5 |
| 3232 | ELF3    | PTGS2 | CAV1  | PTGS2_CAV1  |
| 3233 | ELF3    | PTGS2 | ALOX5 | PTGS2_ALOX5 |
| 3234 | ING4    | PTGS2 | CAV1  | PTGS2_CAV1  |
| 3235 | ING4    | PTGS2 | ALOX5 | PTGS2_ALOX5 |
| 3236 | STAT3   | PTGS2 | CAV1  | PTGS2_CAV1  |
| 3237 | STAT3   | PTGS2 | ALOX5 | PTGS2_ALOX5 |
| 3238 | SP1     | PTGS2 | CAV1  | PTGS2_CAV1  |
| 3239 | SP1     | PTGS2 | ALOX5 | PTGS2_ALOX5 |
| 3240 | FOS     | PTGS2 | CAV1  | PTGS2_CAV1  |
| 3241 | FOS     | PTGS2 | ALOX5 | PTGS2_ALOX5 |
| 3242 | JUND    | PTGS2 | CAV1  | PTGS2_CAV1  |
| 3243 | JUND    | PTGS2 | ALOX5 | PTGS2_ALOX5 |
| 3244 | CTNNB1  | PTGS2 | CAV1  | PTGS2_CAV1  |
| 3245 | CTNNB1  | PTGS2 | ALOX5 | PTGS2_ALOX5 |
| 3246 | AR      | PTGS2 | CAV1  | PTGS2_CAV1  |
| 3247 | AR      | PTGS2 | ALOX5 | PTGS2_ALOX5 |



|             |        |         |             |
|-------------|--------|---------|-------------|
| 3248 NFIL3  | PTGS2  | CAV1    | PTGS2_CAV1  |
| 3249 NFIL3  | PTGS2  | ALOX5   | PTGS2_ALOX5 |
| 3250 JUN    | PTGS2  | CAV1    | PTGS2_CAV1  |
| 3251 JUN    | PTGS2  | ALOX5   | PTGS2_ALOX5 |
| 3252 RELA   | PTGS2  | CAV1    | PTGS2_CAV1  |
| 3253 RELA   | PTGS2  | ALOX5   | PTGS2_ALOX5 |
| 3254 HMGA1  | PTGS2  | CAV1    | PTGS2_CAV1  |
| 3255 HMGA1  | PTGS2  | ALOX5   | PTGS2_ALOX5 |
| 3256 NR0B2  | PTGS2  | CAV1    | PTGS2_CAV1  |
| 3257 NR0B2  | PTGS2  | ALOX5   | PTGS2_ALOX5 |
| 3258 PGR    | PTGS2  | CAV1    | PTGS2_CAV1  |
| 3259 PGR    | PTGS2  | ALOX5   | PTGS2_ALOX5 |
| 3260 USF2   | PTGS2  | CAV1    | PTGS2_CAV1  |
| 3261 USF2   | PTGS2  | ALOX5   | PTGS2_ALOX5 |
| 3262 CDX2   | PTGS2  | CAV1    | PTGS2_CAV1  |
| 3263 CDX2   | PTGS2  | ALOX5   | PTGS2_ALOX5 |
| 3264 CREBBP | PTGS2  | CAV1    | PTGS2_CAV1  |
| 3265 CREBBP | PTGS2  | ALOX5   | PTGS2_ALOX5 |
| 3266 STAT6  | PTGS2  | CAV1    | PTGS2_CAV1  |
| 3267 STAT6  | PTGS2  | ALOX5   | PTGS2_ALOX5 |
| 3268 EP300  | PTGS2  | CAV1    | PTGS2_CAV1  |
| 3269 EP300  | PTGS2  | ALOX5   | PTGS2_ALOX5 |
| 3270 NFKB1  | PTGS2  | CAV1    | PTGS2_CAV1  |
| 3271 NFKB1  | PTGS2  | ALOX5   | PTGS2_ALOX5 |
| 3272 EGR1   | PTGS2  | CAV1    | PTGS2_CAV1  |
| 3273 EGR1   | PTGS2  | ALOX5   | PTGS2_ALOX5 |
| 3274 CDX1   | PTGS2  | CAV1    | PTGS2_CAV1  |
| 3275 CDX1   | PTGS2  | ALOX5   | PTGS2_ALOX5 |
| 3276 CREB1  | PTGS2  | CAV1    | PTGS2_CAV1  |
| 3277 CREB1  | PTGS2  | ALOX5   | PTGS2_ALOX5 |
| 3278 TFAP2A | PTGS2  | CAV1    | PTGS2_CAV1  |
| 3279 TFAP2A | PTGS2  | ALOX5   | PTGS2_ALOX5 |
| 3280 TCF7L2 | PTGS2  | CAV1    | PTGS2_CAV1  |
| 3281 TCF7L2 | PTGS2  | ALOX5   | PTGS2_ALOX5 |
| 3282 ESR1   | PTMA   | VIPR1   | PTMA_VIPR1  |
| 3283 JUN    | PTN    | SDC1    | PTN_SDC1    |
| 3284 JUN    | PTN    | PLXNB2  | PTN_PLXNB2  |
| 3285 SP1    | PTN    | SDC1    | PTN_SDC1    |
| 3286 SP1    | PTN    | PLXNB2  | PTN_PLXNB2  |
| 3287 HOXA5  | PTN    | SDC1    | PTN_SDC1    |
| 3288 HOXA5  | PTN    | PLXNB2  | PTN_PLXNB2  |
| 3289 DNMT1  | RELN   | ITGB1   | RELN_ITGB1  |
| 3290 DNMT1  | RELN   | ITGA3   | RELN_ITGA3  |
| 3291 MECP2  | RELN   | ITGB1   | RELN_ITGB1  |
| 3292 MECP2  | RELN   | ITGA3   | RELN_ITGA3  |
| 3293 HDAC1  | RELN   | ITGB1   | RELN_ITGB1  |
| 3294 HDAC1  | RELN   | ITGA3   | RELN_ITGA3  |
| 3295 TBR1   | RELN   | ITGB1   | RELN_ITGB1  |
| 3296 TBR1   | RELN   | ITGA3   | RELN_ITGA3  |
| 3297 PPARG  | REN    | ATP6AP2 | REN_ATP6AP2 |
| 3298 POU1F1 | REN    | ATP6AP2 | REN_ATP6AP2 |
| 3299 JUN    | REN    | ATP6AP2 | REN_ATP6AP2 |
| 3300 SPI1   | RNASE2 | TLR2    | RNASE2_TLR2 |
| 3301 HNF4A  | RNASE2 | TLR2    | RNASE2_TLR2 |
| 3302 CEBPA  | S100A9 | TLR4    | S100A9_TLR4 |
| 3303 GLI1   | S100A9 | TLR4    | S100A9_TLR4 |
| 3304 CEBPB  | S100A9 | TLR4    | S100A9_TLR4 |
| 3305 CEBPB  | SAA1   | FPR2    | SAA1_FPR2   |

|      |        |          |        |                |
|------|--------|----------|--------|----------------|
| 3306 | CEBPB  | SAA1     | FPR1   | SAA1_FPR1      |
| 3307 | CEBPB  | SAA1     | SCARB1 | SAA1_SCARB1    |
| 3308 | NFKB1  | SAA1     | FPR2   | SAA1_FPR2      |
| 3309 | NFKB1  | SAA1     | FPR1   | SAA1_FPR1      |
| 3310 | NFKB1  | SAA1     | SCARB1 | SAA1_SCARB1    |
| 3311 | STAT3  | SAA1     | FPR2   | SAA1_FPR2      |
| 3312 | STAT3  | SAA1     | FPR1   | SAA1_FPR1      |
| 3313 | STAT3  | SAA1     | SCARB1 | SAA1_SCARB1    |
| 3314 | CEBPA  | SAA1     | FPR2   | SAA1_FPR2      |
| 3315 | CEBPA  | SAA1     | FPR1   | SAA1_FPR1      |
| 3316 | CEBPA  | SAA1     | SCARB1 | SAA1_SCARB1    |
| 3317 | RELA   | SAA1     | FPR2   | SAA1_FPR2      |
| 3318 | RELA   | SAA1     | FPR1   | SAA1_FPR1      |
| 3319 | RELA   | SAA1     | SCARB1 | SAA1_SCARB1    |
| 3320 | CEBPA  | SERPINC1 | LRP1   | SERPINC1_LRP1  |
| 3321 | FOXA1  | SERPINC1 | LRP1   | SERPINC1_LRP1  |
| 3322 | NR2F1  | SERPINC1 | LRP1   | SERPINC1_LRP1  |
| 3323 | RXRA   | SERPINC1 | LRP1   | SERPINC1_LRP1  |
| 3324 | FOXA2  | SERPINC1 | LRP1   | SERPINC1_LRP1  |
| 3325 | HNF4A  | SERPINC1 | LRP1   | SERPINC1_LRP1  |
| 3326 | THRA   | SERPINC1 | LRP1   | SERPINC1_LRP1  |
| 3327 | NFKB1  | SERPINE1 | LRP1   | SERPINE1_LRP1  |
| 3328 | NFKB1  | SERPINE1 | PLAUR  | SERPINE1_PLAUR |
| 3329 | RELA   | SERPINE1 | LRP1   | SERPINE1_LRP1  |
| 3330 | RELA   | SERPINE1 | PLAUR  | SERPINE1_PLAUR |
| 3331 | ESR2   | SERPINE1 | LRP1   | SERPINE1_LRP1  |
| 3332 | ESR2   | SERPINE1 | PLAUR  | SERPINE1_PLAUR |
| 3333 | NR4A1  | SERPINE1 | LRP1   | SERPINE1_LRP1  |
| 3334 | NR4A1  | SERPINE1 | PLAUR  | SERPINE1_PLAUR |
| 3335 | SRF    | SERPINE1 | LRP1   | SERPINE1_LRP1  |
| 3336 | SRF    | SERPINE1 | PLAUR  | SERPINE1_PLAUR |
| 3337 | SP1    | SERPINE1 | LRP1   | SERPINE1_LRP1  |
| 3338 | SP1    | SERPINE1 | PLAUR  | SERPINE1_PLAUR |
| 3339 | SMAD3  | SERPINE1 | LRP1   | SERPINE1_LRP1  |
| 3340 | SMAD3  | SERPINE1 | PLAUR  | SERPINE1_PLAUR |
| 3341 | PPARA  | SERPINE1 | LRP1   | SERPINE1_LRP1  |
| 3342 | PPARA  | SERPINE1 | PLAUR  | SERPINE1_PLAUR |
| 3343 | SMAD4  | SERPINE1 | LRP1   | SERPINE1_LRP1  |
| 3344 | SMAD4  | SERPINE1 | PLAUR  | SERPINE1_PLAUR |
| 3345 | ARNTL2 | SERPINE1 | LRP1   | SERPINE1_LRP1  |
| 3346 | ARNTL2 | SERPINE1 | PLAUR  | SERPINE1_PLAUR |
| 3347 | EPAS1  | SERPINE1 | LRP1   | SERPINE1_LRP1  |
| 3348 | EPAS1  | SERPINE1 | PLAUR  | SERPINE1_PLAUR |
| 3349 | PARP1  | SERPINE1 | LRP1   | SERPINE1_LRP1  |
| 3350 | PARP1  | SERPINE1 | PLAUR  | SERPINE1_PLAUR |
| 3351 | PPARG  | SERPINE1 | LRP1   | SERPINE1_LRP1  |
| 3352 | PPARG  | SERPINE1 | PLAUR  | SERPINE1_PLAUR |
| 3353 | KLF10  | SERPINE1 | LRP1   | SERPINE1_LRP1  |
| 3354 | KLF10  | SERPINE1 | PLAUR  | SERPINE1_PLAUR |
| 3355 | USF1   | SERPINE1 | LRP1   | SERPINE1_LRP1  |
| 3356 | USF1   | SERPINE1 | PLAUR  | SERPINE1_PLAUR |
| 3357 | TGIF1  | SERPINE1 | LRP1   | SERPINE1_LRP1  |
| 3358 | TGIF1  | SERPINE1 | PLAUR  | SERPINE1_PLAUR |
| 3359 | ESR1   | SERPINE1 | LRP1   | SERPINE1_LRP1  |
| 3360 | ESR1   | SERPINE1 | PLAUR  | SERPINE1_PLAUR |
| 3361 | E2F1   | SERPINE1 | LRP1   | SERPINE1_LRP1  |
| 3362 | E2F1   | SERPINE1 | PLAUR  | SERPINE1_PLAUR |
| 3363 | HIF1A  | SERPINE1 | LRP1   | SERPINE1_LRP1  |

|      |         |          |       |                |
|------|---------|----------|-------|----------------|
| 3364 | HIF1A   | SERPINE1 | PLAUR | SERPINE1_PLAUR |
| 3365 | HSF1    | SERPINE1 | LRP1  | SERPINE1_LRP1  |
| 3366 | HSF1    | SERPINE1 | PLAUR | SERPINE1_PLAUR |
| 3367 | RELA    | SFTPA1   | TLR2  | SFTPA1_TLR2    |
| 3368 | NKX2-1  | SFTPA1   | TLR2  | SFTPA1_TLR2    |
| 3369 | NFKB1   | SFTPA1   | TLR2  | SFTPA1_TLR2    |
| 3370 | JUNB    | SFTPD    | LY96  | SFTPD_LY96     |
| 3371 | JUNB    | SFTPD    | TLR4  | SFTPD_TLR4     |
| 3372 | CEBPG   | SFTPD    | LY96  | SFTPD_LY96     |
| 3373 | CEBPG   | SFTPD    | TLR4  | SFTPD_TLR4     |
| 3374 | JUND    | SFTPD    | LY96  | SFTPD_LY96     |
| 3375 | JUND    | SFTPD    | TLR4  | SFTPD_TLR4     |
| 3376 | FOSL1   | SFTPD    | LY96  | SFTPD_LY96     |
| 3377 | FOSL1   | SFTPD    | TLR4  | SFTPD_TLR4     |
| 3378 | RB1     | SFTPD    | LY96  | SFTPD_LY96     |
| 3379 | RB1     | SFTPD    | TLR4  | SFTPD_TLR4     |
| 3380 | CEBPA   | SFTPD    | LY96  | SFTPD_LY96     |
| 3381 | CEBPA   | SFTPD    | TLR4  | SFTPD_TLR4     |
| 3382 | CEBPB   | SFTPD    | LY96  | SFTPD_LY96     |
| 3383 | CEBPB   | SFTPD    | TLR4  | SFTPD_TLR4     |
| 3384 | HNF4A   | SHBG     | CLDN4 | SHBG_CLDN4     |
| 3385 | PAX3    | SHH      | PTCH2 | SHH_PTCH2      |
| 3386 | STAT3   | SHH      | PTCH2 | SHH_PTCH2      |
| 3387 | SOX9    | SHH      | PTCH2 | SHH_PTCH2      |
| 3388 | HDAC5   | SLIT2    | SDC1  | SLIT2_SDC1     |
| 3389 | IRF1    | SLPI     | CD4   | SLPI_CD4       |
| 3390 | TFCP2   | SPP1     | S1PR1 | SPP1_S1PR1     |
| 3391 | TFCP2   | SPP1     | CD44  | SPP1_CD44      |
| 3392 | TFCP2   | SPP1     | ITGA5 | SPP1_ITGA5     |
| 3393 | TFCP2   | SPP1     | ITGB1 | SPP1_ITGB1     |
| 3394 | TFCP2   | SPP1     | ITGAV | SPP1_ITGAV     |
| 3395 | TFCP2   | SPP1     | ITGA4 | SPP1_ITGA4     |
| 3396 | TFCP2   | SPP1     | ITGA9 | SPP1_ITGA9     |
| 3397 | NR3C1   | SPP1     | S1PR1 | SPP1_S1PR1     |
| 3398 | NR3C1   | SPP1     | CD44  | SPP1_CD44      |
| 3399 | NR3C1   | SPP1     | ITGA5 | SPP1_ITGA5     |
| 3400 | NR3C1   | SPP1     | ITGB1 | SPP1_ITGB1     |
| 3401 | NR3C1   | SPP1     | ITGAV | SPP1_ITGAV     |
| 3402 | NR3C1   | SPP1     | ITGA4 | SPP1_ITGA4     |
| 3403 | NR3C1   | SPP1     | ITGA9 | SPP1_ITGA9     |
| 3404 | POU5F1  | SPP1     | S1PR1 | SPP1_S1PR1     |
| 3405 | POU5F1  | SPP1     | CD44  | SPP1_CD44      |
| 3406 | POU5F1  | SPP1     | ITGA5 | SPP1_ITGA5     |
| 3407 | POU5F1  | SPP1     | ITGB1 | SPP1_ITGB1     |
| 3408 | POU5F1  | SPP1     | ITGAV | SPP1_ITGAV     |
| 3409 | POU5F1  | SPP1     | ITGA4 | SPP1_ITGA4     |
| 3410 | POU5F1  | SPP1     | ITGA9 | SPP1_ITGA9     |
| 3411 | FOXD3   | SPP1     | S1PR1 | SPP1_S1PR1     |
| 3412 | FOXD3   | SPP1     | CD44  | SPP1_CD44      |
| 3413 | FOXD3   | SPP1     | ITGA5 | SPP1_ITGA5     |
| 3414 | FOXD3   | SPP1     | ITGB1 | SPP1_ITGB1     |
| 3415 | FOXD3   | SPP1     | ITGAV | SPP1_ITGAV     |
| 3416 | FOXD3   | SPP1     | ITGA4 | SPP1_ITGA4     |
| 3417 | FOXD3   | SPP1     | ITGA9 | SPP1_ITGA9     |
| 3418 | HTATIP2 | SPP1     | S1PR1 | SPP1_S1PR1     |
| 3419 | HTATIP2 | SPP1     | CD44  | SPP1_CD44      |
| 3420 | HTATIP2 | SPP1     | ITGA5 | SPP1_ITGA5     |
| 3421 | HTATIP2 | SPP1     | ITGB1 | SPP1_ITGB1     |

|      |         |      |       |            |
|------|---------|------|-------|------------|
| 3422 | HTATIP2 | SPP1 | ITGAV | SPP1_ITGAV |
| 3423 | HTATIP2 | SPP1 | ITGA4 | SPP1_ITGA4 |
| 3424 | HTATIP2 | SPP1 | ITGA9 | SPP1_ITGA9 |
| 3425 | CEBPA   | SPP1 | S1PR1 | SPP1_S1PR1 |
| 3426 | CEBPA   | SPP1 | CD44  | SPP1_CD44  |
| 3427 | CEBPA   | SPP1 | ITGA5 | SPP1_ITGA5 |
| 3428 | CEBPA   | SPP1 | ITGB1 | SPP1_ITGB1 |
| 3429 | CEBPA   | SPP1 | ITGAV | SPP1_ITGAV |
| 3430 | CEBPA   | SPP1 | ITGA4 | SPP1_ITGA4 |
| 3431 | CEBPA   | SPP1 | ITGA9 | SPP1_ITGA9 |
| 3432 | POU2F1  | SPP1 | S1PR1 | SPP1_S1PR1 |
| 3433 | POU2F1  | SPP1 | CD44  | SPP1_CD44  |
| 3434 | POU2F1  | SPP1 | ITGA5 | SPP1_ITGA5 |
| 3435 | POU2F1  | SPP1 | ITGB1 | SPP1_ITGB1 |
| 3436 | POU2F1  | SPP1 | ITGAV | SPP1_ITGAV |
| 3437 | POU2F1  | SPP1 | ITGA4 | SPP1_ITGA4 |
| 3438 | POU2F1  | SPP1 | ITGA9 | SPP1_ITGA9 |
| 3439 | HDAC1   | SPP1 | S1PR1 | SPP1_S1PR1 |
| 3440 | HDAC1   | SPP1 | CD44  | SPP1_CD44  |
| 3441 | HDAC1   | SPP1 | ITGA5 | SPP1_ITGA5 |
| 3442 | HDAC1   | SPP1 | ITGB1 | SPP1_ITGB1 |
| 3443 | HDAC1   | SPP1 | ITGAV | SPP1_ITGAV |
| 3444 | HDAC1   | SPP1 | ITGA4 | SPP1_ITGA4 |
| 3445 | HDAC1   | SPP1 | ITGA9 | SPP1_ITGA9 |
| 3446 | ING4    | SPP1 | S1PR1 | SPP1_S1PR1 |
| 3447 | ING4    | SPP1 | CD44  | SPP1_CD44  |
| 3448 | ING4    | SPP1 | ITGA5 | SPP1_ITGA5 |
| 3449 | ING4    | SPP1 | ITGB1 | SPP1_ITGB1 |
| 3450 | ING4    | SPP1 | ITGAV | SPP1_ITGAV |
| 3451 | ING4    | SPP1 | ITGA4 | SPP1_ITGA4 |
| 3452 | ING4    | SPP1 | ITGA9 | SPP1_ITGA9 |
| 3453 | SP1     | SPP1 | S1PR1 | SPP1_S1PR1 |
| 3454 | SP1     | SPP1 | CD44  | SPP1_CD44  |
| 3455 | SP1     | SPP1 | ITGA5 | SPP1_ITGA5 |
| 3456 | SP1     | SPP1 | ITGB1 | SPP1_ITGB1 |
| 3457 | SP1     | SPP1 | ITGAV | SPP1_ITGAV |
| 3458 | SP1     | SPP1 | ITGA4 | SPP1_ITGA4 |
| 3459 | SP1     | SPP1 | ITGA9 | SPP1_ITGA9 |
| 3460 | POU2F2  | SPP1 | S1PR1 | SPP1_S1PR1 |
| 3461 | POU2F2  | SPP1 | CD44  | SPP1_CD44  |
| 3462 | POU2F2  | SPP1 | ITGA5 | SPP1_ITGA5 |
| 3463 | POU2F2  | SPP1 | ITGB1 | SPP1_ITGB1 |
| 3464 | POU2F2  | SPP1 | ITGAV | SPP1_ITGAV |
| 3465 | POU2F2  | SPP1 | ITGA4 | SPP1_ITGA4 |
| 3466 | POU2F2  | SPP1 | ITGA9 | SPP1_ITGA9 |
| 3467 | ERG     | SPP1 | S1PR1 | SPP1_S1PR1 |
| 3468 | ERG     | SPP1 | CD44  | SPP1_CD44  |
| 3469 | ERG     | SPP1 | ITGA5 | SPP1_ITGA5 |
| 3470 | ERG     | SPP1 | ITGB1 | SPP1_ITGB1 |
| 3471 | ERG     | SPP1 | ITGAV | SPP1_ITGAV |
| 3472 | ERG     | SPP1 | ITGA4 | SPP1_ITGA4 |
| 3473 | ERG     | SPP1 | ITGA9 | SPP1_ITGA9 |
| 3474 | USF2    | TCN2 | LRP2  | TCN2_LRP2  |
| 3475 | USF2    | TCN2 | CNR1  | TCN2_CNR1  |
| 3476 | USF1    | TCN2 | LRP2  | TCN2_LRP2  |
| 3477 | USF1    | TCN2 | CNR1  | TCN2_CNR1  |
| 3478 | SP1     | TCN2 | LRP2  | TCN2_LRP2  |
| 3479 | SP1     | TCN2 | CNR1  | TCN2_CNR1  |

|             |       |        |              |
|-------------|-------|--------|--------------|
| 3480 SP3    | TCN2  | LRP2   | TCN2_LRP2    |
| 3481 SP3    | TCN2  | CNR1   | TCN2_CNR1    |
| 3482 PAX8   | TG    | ASGR1  | TG_ASGR1     |
| 3483 KCNIP3 | TG    | ASGR1  | TG_ASGR1     |
| 3484 PPARG  | TG    | ASGR1  | TG_ASGR1     |
| 3485 ESR1   | TGFA  | EGFR   | TGFA_EGFR    |
| 3486 ESR1   | TGFA  | ERBB3  | TGFA_ERBB3   |
| 3487 ESR2   | TGFA  | EGFR   | TGFA_EGFR    |
| 3488 ESR2   | TGFA  | ERBB3  | TGFA_ERBB3   |
| 3489 SP1    | TGFA  | EGFR   | TGFA_EGFR    |
| 3490 SP1    | TGFA  | ERBB3  | TGFA_ERBB3   |
| 3491 AR     | TGFA  | EGFR   | TGFA_EGFR    |
| 3492 AR     | TGFA  | ERBB3  | TGFA_ERBB3   |
| 3493 FOSL2  | TGFB1 | CXCR4  | TGFB1_CXCR4  |
| 3494 FOSL2  | TGFB1 | CAV1   | TGFB1_CAV1   |
| 3495 FOSL2  | TGFB1 | TGFBR1 | TGFB1_TGFBR1 |
| 3496 FOSL2  | TGFB1 | ITGB8  | TGFB1_ITGB8  |
| 3497 NFKB1  | TGFB1 | CXCR4  | TGFB1_CXCR4  |
| 3498 NFKB1  | TGFB1 | CAV1   | TGFB1_CAV1   |
| 3499 NFKB1  | TGFB1 | TGFBR1 | TGFB1_TGFBR1 |
| 3500 NFKB1  | TGFB1 | ITGB8  | TGFB1_ITGB8  |
| 3501 USF2   | TGFB1 | CXCR4  | TGFB1_CXCR4  |
| 3502 USF2   | TGFB1 | CAV1   | TGFB1_CAV1   |
| 3503 USF2   | TGFB1 | TGFBR1 | TGFB1_TGFBR1 |
| 3504 USF2   | TGFB1 | ITGB8  | TGFB1_ITGB8  |
| 3505 SP1    | TGFB1 | CXCR4  | TGFB1_CXCR4  |
| 3506 SP1    | TGFB1 | CAV1   | TGFB1_CAV1   |
| 3507 SP1    | TGFB1 | TGFBR1 | TGFB1_TGFBR1 |
| 3508 SP1    | TGFB1 | ITGB8  | TGFB1_ITGB8  |
| 3509 STAT3  | TGFB1 | CXCR4  | TGFB1_CXCR4  |
| 3510 STAT3  | TGFB1 | CAV1   | TGFB1_CAV1   |
| 3511 STAT3  | TGFB1 | TGFBR1 | TGFB1_TGFBR1 |
| 3512 STAT3  | TGFB1 | ITGB8  | TGFB1_ITGB8  |
| 3513 FOSB   | TGFB1 | CXCR4  | TGFB1_CXCR4  |
| 3514 FOSB   | TGFB1 | CAV1   | TGFB1_CAV1   |
| 3515 FOSB   | TGFB1 | TGFBR1 | TGFB1_TGFBR1 |
| 3516 FOSB   | TGFB1 | ITGB8  | TGFB1_ITGB8  |
| 3517 SMAD4  | TGFB1 | CXCR4  | TGFB1_CXCR4  |
| 3518 SMAD4  | TGFB1 | CAV1   | TGFB1_CAV1   |
| 3519 SMAD4  | TGFB1 | TGFBR1 | TGFB1_TGFBR1 |
| 3520 SMAD4  | TGFB1 | ITGB8  | TGFB1_ITGB8  |
| 3521 SMAD3  | TGFB1 | CXCR4  | TGFB1_CXCR4  |
| 3522 SMAD3  | TGFB1 | CAV1   | TGFB1_CAV1   |
| 3523 SMAD3  | TGFB1 | TGFBR1 | TGFB1_TGFBR1 |
| 3524 SMAD3  | TGFB1 | ITGB8  | TGFB1_ITGB8  |
| 3525 SMAD7  | TGFB1 | CXCR4  | TGFB1_CXCR4  |
| 3526 SMAD7  | TGFB1 | CAV1   | TGFB1_CAV1   |
| 3527 SMAD7  | TGFB1 | TGFBR1 | TGFB1_TGFBR1 |
| 3528 SMAD7  | TGFB1 | ITGB8  | TGFB1_ITGB8  |
| 3529 ASH1L  | TGFB1 | CXCR4  | TGFB1_CXCR4  |
| 3530 ASH1L  | TGFB1 | CAV1   | TGFB1_CAV1   |
| 3531 ASH1L  | TGFB1 | TGFBR1 | TGFB1_TGFBR1 |
| 3532 ASH1L  | TGFB1 | ITGB8  | TGFB1_ITGB8  |
| 3533 USF1   | TGFB1 | CXCR4  | TGFB1_CXCR4  |
| 3534 USF1   | TGFB1 | CAV1   | TGFB1_CAV1   |
| 3535 USF1   | TGFB1 | TGFBR1 | TGFB1_TGFBR1 |
| 3536 USF1   | TGFB1 | ITGB8  | TGFB1_ITGB8  |
| 3537 JUND   | TGFB1 | CXCR4  | TGFB1_CXCR4  |

|            |       |           |                 |
|------------|-------|-----------|-----------------|
| 3538 JUND  | TGFB1 | CAV1      | TGFB1_CAV1      |
| 3539 JUND  | TGFB1 | TGFBR1    | TGFB1_TGFBR1    |
| 3540 JUND  | TGFB1 | ITGB8     | TGFB1_ITGB8     |
| 3541 ATF1  | TGFB2 | TGFBR1    | TGFB2_TGFBR1    |
| 3542 ATF2  | TGFB2 | TGFBR1    | TGFB2_TGFBR1    |
| 3543 USF2  | TGFB2 | TGFBR1    | TGFB2_TGFBR1    |
| 3544 USF1  | TGFB2 | TGFBR1    | TGFB2_TGFBR1    |
| 3545 HIF1A | TGFB3 | TGFBR1    | TGFB3_TGFBR1    |
| 3546 SNAI1 | THBS1 | CD36      | THBS1_CD36      |
| 3547 SNAI1 | THBS1 | CD47      | THBS1_CD47      |
| 3548 SNAI1 | THBS1 | SDC1      | THBS1_SDC1      |
| 3549 SNAI1 | THBS1 | SDC4      | THBS1_SDC4      |
| 3550 SNAI1 | THBS1 | TNFRSF11B | THBS1_TNFRSF11B |
| 3551 SNAI1 | THBS1 | ITGA6     | THBS1_ITGA6     |
| 3552 SNAI1 | THBS1 | ITGA3     | THBS1_ITGA3     |
| 3553 SNAI1 | THBS1 | SCARB1    | THBS1_SCARB1    |
| 3554 SNAI1 | THBS1 | ITGA4     | THBS1_ITGA4     |
| 3555 SNAI1 | THBS1 | ITGB3     | THBS1_ITGB3     |
| 3556 SNAI1 | THBS1 | LRP1      | THBS1_LRP1      |
| 3557 SNAI1 | THBS1 | ITGA2B    | THBS1_ITGA2B    |
| 3558 SNAI1 | THBS1 | ITGB1     | THBS1_ITGB1     |
| 3559 SNAI1 | THBS1 | LRP5      | THBS1_LRP5      |
| 3560 E2F1  | THBS1 | CD36      | THBS1_CD36      |
| 3561 E2F1  | THBS1 | CD47      | THBS1_CD47      |
| 3562 E2F1  | THBS1 | SDC1      | THBS1_SDC1      |
| 3563 E2F1  | THBS1 | SDC4      | THBS1_SDC4      |
| 3564 E2F1  | THBS1 | TNFRSF11B | THBS1_TNFRSF11B |
| 3565 E2F1  | THBS1 | ITGA6     | THBS1_ITGA6     |
| 3566 E2F1  | THBS1 | ITGA3     | THBS1_ITGA3     |
| 3567 E2F1  | THBS1 | SCARB1    | THBS1_SCARB1    |
| 3568 E2F1  | THBS1 | ITGA4     | THBS1_ITGA4     |
| 3569 E2F1  | THBS1 | ITGB3     | THBS1_ITGB3     |
| 3570 E2F1  | THBS1 | LRP1      | THBS1_LRP1      |
| 3571 E2F1  | THBS1 | ITGA2B    | THBS1_ITGA2B    |
| 3572 E2F1  | THBS1 | ITGB1     | THBS1_ITGB1     |
| 3573 E2F1  | THBS1 | LRP5      | THBS1_LRP5      |
| 3574 TP53  | THBS1 | CD36      | THBS1_CD36      |
| 3575 TP53  | THBS1 | CD47      | THBS1_CD47      |
| 3576 TP53  | THBS1 | SDC1      | THBS1_SDC1      |
| 3577 TP53  | THBS1 | SDC4      | THBS1_SDC4      |
| 3578 TP53  | THBS1 | TNFRSF11B | THBS1_TNFRSF11B |
| 3579 TP53  | THBS1 | ITGA6     | THBS1_ITGA6     |
| 3580 TP53  | THBS1 | ITGA3     | THBS1_ITGA3     |
| 3581 TP53  | THBS1 | SCARB1    | THBS1_SCARB1    |
| 3582 TP53  | THBS1 | ITGA4     | THBS1_ITGA4     |
| 3583 TP53  | THBS1 | ITGB3     | THBS1_ITGB3     |
| 3584 TP53  | THBS1 | LRP1      | THBS1_LRP1      |
| 3585 TP53  | THBS1 | ITGA2B    | THBS1_ITGA2B    |
| 3586 TP53  | THBS1 | ITGB1     | THBS1_ITGB1     |
| 3587 TP53  | THBS1 | LRP5      | THBS1_LRP5      |
| 3588 WT1   | THBS1 | CD36      | THBS1_CD36      |
| 3589 WT1   | THBS1 | CD47      | THBS1_CD47      |
| 3590 WT1   | THBS1 | SDC1      | THBS1_SDC1      |
| 3591 WT1   | THBS1 | SDC4      | THBS1_SDC4      |
| 3592 WT1   | THBS1 | TNFRSF11B | THBS1_TNFRSF11B |
| 3593 WT1   | THBS1 | ITGA6     | THBS1_ITGA6     |
| 3594 WT1   | THBS1 | ITGA3     | THBS1_ITGA3     |
| 3595 WT1   | THBS1 | SCARB1    | THBS1_SCARB1    |

|             |       |           |                 |
|-------------|-------|-----------|-----------------|
| 3596 WT1    | THBS1 | ITGA4     | THBS1_ITGA4     |
| 3597 WT1    | THBS1 | ITGB3     | THBS1_ITGB3     |
| 3598 WT1    | THBS1 | LRP1      | THBS1_LRP1      |
| 3599 WT1    | THBS1 | ITGA2B    | THBS1_ITGA2B    |
| 3600 WT1    | THBS1 | ITGB1     | THBS1_ITGB1     |
| 3601 WT1    | THBS1 | LRP5      | THBS1_LRP5      |
| 3602 USF2   | THBS1 | CD36      | THBS1_CD36      |
| 3603 USF2   | THBS1 | CD47      | THBS1_CD47      |
| 3604 USF2   | THBS1 | SDC1      | THBS1_SDC1      |
| 3605 USF2   | THBS1 | SDC4      | THBS1_SDC4      |
| 3606 USF2   | THBS1 | TNFRSF11B | THBS1_TNFRSF11B |
| 3607 USF2   | THBS1 | ITGA6     | THBS1_ITGA6     |
| 3608 USF2   | THBS1 | ITGA3     | THBS1_ITGA3     |
| 3609 USF2   | THBS1 | SCARB1    | THBS1_SCARB1    |
| 3610 USF2   | THBS1 | ITGA4     | THBS1_ITGA4     |
| 3611 USF2   | THBS1 | ITGB3     | THBS1_ITGB3     |
| 3612 USF2   | THBS1 | LRP1      | THBS1_LRP1      |
| 3613 USF2   | THBS1 | ITGA2B    | THBS1_ITGA2B    |
| 3614 USF2   | THBS1 | ITGB1     | THBS1_ITGB1     |
| 3615 USF2   | THBS1 | LRP5      | THBS1_LRP5      |
| 3616 NR1I2  | THBS1 | CD36      | THBS1_CD36      |
| 3617 NR1I2  | THBS1 | CD47      | THBS1_CD47      |
| 3618 NR1I2  | THBS1 | SDC1      | THBS1_SDC1      |
| 3619 NR1I2  | THBS1 | SDC4      | THBS1_SDC4      |
| 3620 NR1I2  | THBS1 | TNFRSF11B | THBS1_TNFRSF11B |
| 3621 NR1I2  | THBS1 | ITGA6     | THBS1_ITGA6     |
| 3622 NR1I2  | THBS1 | ITGA3     | THBS1_ITGA3     |
| 3623 NR1I2  | THBS1 | SCARB1    | THBS1_SCARB1    |
| 3624 NR1I2  | THBS1 | ITGA4     | THBS1_ITGA4     |
| 3625 NR1I2  | THBS1 | ITGB3     | THBS1_ITGB3     |
| 3626 NR1I2  | THBS1 | LRP1      | THBS1_LRP1      |
| 3627 NR1I2  | THBS1 | ITGA2B    | THBS1_ITGA2B    |
| 3628 NR1I2  | THBS1 | ITGB1     | THBS1_ITGB1     |
| 3629 NR1I2  | THBS1 | LRP5      | THBS1_LRP5      |
| 3630 HOXB7  | THBS2 | ITGA4     | THBS2_ITGA4     |
| 3631 HOXB7  | THBS2 | CD47      | THBS2_CD47      |
| 3632 HOXB7  | THBS2 | ITGB1     | THBS2_ITGB1     |
| 3633 FOSB   | TIMP1 | CD63      | TIMP1_CD63      |
| 3634 STAT3  | TIMP1 | CD63      | TIMP1_CD63      |
| 3635 TWIST1 | TIMP1 | CD63      | TIMP1_CD63      |
| 3636 SP3    | TIMP1 | CD63      | TIMP1_CD63      |
| 3637 SP1    | TIMP1 | CD63      | TIMP1_CD63      |
| 3638 FOSL2  | TIMP1 | CD63      | TIMP1_CD63      |
| 3639 RELA   | TIMP1 | CD63      | TIMP1_CD63      |
| 3640 PPARD  | TIMP1 | CD63      | TIMP1_CD63      |
| 3641 JUND   | TIMP1 | CD63      | TIMP1_CD63      |
| 3642 PAX5   | TIMP1 | CD63      | TIMP1_CD63      |
| 3643 NFKB1  | TIMP1 | CD63      | TIMP1_CD63      |
| 3644 RUNX3  | TIMP1 | CD63      | TIMP1_CD63      |
| 3645 STAT1  | TIMP1 | CD63      | TIMP1_CD63      |
| 3646 RUNX1  | TIMP1 | CD63      | TIMP1_CD63      |
| 3647 ASH1L  | TIMP1 | CD63      | TIMP1_CD63      |
| 3648 NR4A1  | TIMP2 | ITGA3     | TIMP2_ITGA3     |
| 3649 NR4A1  | TIMP2 | ITGB1     | TIMP2_ITGB1     |
| 3650 PTTG1  | TIMP2 | ITGA3     | TIMP2_ITGA3     |
| 3651 PTTG1  | TIMP2 | ITGB1     | TIMP2_ITGB1     |
| 3652 JUN    | TIMP2 | ITGA3     | TIMP2_ITGA3     |
| 3653 JUN    | TIMP2 | ITGB1     | TIMP2_ITGB1     |

|              |       |          |              |
|--------------|-------|----------|--------------|
| 3654 SP1     | TIMP2 | ITGA3    | TIMP2_ITGA3  |
| 3655 SP1     | TIMP2 | ITGB1    | TIMP2_ITGB1  |
| 3656 ETV4    | TIMP2 | ITGA3    | TIMP2_ITGA3  |
| 3657 ETV4    | TIMP2 | ITGB1    | TIMP2_ITGB1  |
| 3658 SP3     | TIMP2 | ITGA3    | TIMP2_ITGA3  |
| 3659 SP3     | TIMP2 | ITGB1    | TIMP2_ITGB1  |
| 3660 HIF1A   | TIMP2 | ITGA3    | TIMP2_ITGA3  |
| 3661 HIF1A   | TIMP2 | ITGB1    | TIMP2_ITGB1  |
| 3662 TFAP2A  | TIMP2 | ITGA3    | TIMP2_ITGA3  |
| 3663 TFAP2A  | TIMP2 | ITGB1    | TIMP2_ITGB1  |
| 3664 SMAD3   | TNC   | NT5E     | TNC_NT5E     |
| 3665 SMAD3   | TNC   | EGFR     | TNC_EGFR     |
| 3666 SMAD3   | TNC   | SDC1     | TNC_SDC1     |
| 3667 SMAD3   | TNC   | SDC4     | TNC_SDC4     |
| 3668 SMAD3   | TNC   | ITGB1    | TNC_ITGB1    |
| 3669 NFKB1   | TNC   | NT5E     | TNC_NT5E     |
| 3670 NFKB1   | TNC   | EGFR     | TNC_EGFR     |
| 3671 NFKB1   | TNC   | SDC1     | TNC_SDC1     |
| 3672 NFKB1   | TNC   | SDC4     | TNC_SDC4     |
| 3673 NFKB1   | TNC   | ITGB1    | TNC_ITGB1    |
| 3674 SP1     | TNC   | NT5E     | TNC_NT5E     |
| 3675 SP1     | TNC   | EGFR     | TNC_EGFR     |
| 3676 SP1     | TNC   | SDC1     | TNC_SDC1     |
| 3677 SP1     | TNC   | SDC4     | TNC_SDC4     |
| 3678 SP1     | TNC   | ITGB1    | TNC_ITGB1    |
| 3679 ETS2    | TNC   | NT5E     | TNC_NT5E     |
| 3680 ETS2    | TNC   | EGFR     | TNC_EGFR     |
| 3681 ETS2    | TNC   | SDC1     | TNC_SDC1     |
| 3682 ETS2    | TNC   | SDC4     | TNC_SDC4     |
| 3683 ETS2    | TNC   | ITGB1    | TNC_ITGB1    |
| 3684 RELA    | TNC   | NT5E     | TNC_NT5E     |
| 3685 RELA    | TNC   | EGFR     | TNC_EGFR     |
| 3686 RELA    | TNC   | SDC1     | TNC_SDC1     |
| 3687 RELA    | TNC   | SDC4     | TNC_SDC4     |
| 3688 RELA    | TNC   | ITGB1    | TNC_ITGB1    |
| 3689 ETS1    | TNC   | NT5E     | TNC_NT5E     |
| 3690 ETS1    | TNC   | EGFR     | TNC_EGFR     |
| 3691 ETS1    | TNC   | SDC1     | TNC_SDC1     |
| 3692 ETS1    | TNC   | SDC4     | TNC_SDC4     |
| 3693 ETS1    | TNC   | ITGB1    | TNC_ITGB1    |
| 3694 JUN     | TNC   | NT5E     | TNC_NT5E     |
| 3695 JUN     | TNC   | EGFR     | TNC_EGFR     |
| 3696 JUN     | TNC   | SDC1     | TNC_SDC1     |
| 3697 JUN     | TNC   | SDC4     | TNC_SDC4     |
| 3698 JUN     | TNC   | ITGB1    | TNC_ITGB1    |
| 3699 SMAD4   | TNC   | NT5E     | TNC_NT5E     |
| 3700 SMAD4   | TNC   | EGFR     | TNC_EGFR     |
| 3701 SMAD4   | TNC   | SDC1     | TNC_SDC1     |
| 3702 SMAD4   | TNC   | SDC4     | TNC_SDC4     |
| 3703 SMAD4   | TNC   | ITGB1    | TNC_ITGB1    |
| 3704 ETV4    | TNF   | TNFRSF1B | TNF_TNFRSF1B |
| 3705 ETV4    | TNF   | LTBR     | TNF_LTBR     |
| 3706 SP1     | TNF   | TNFRSF1B | TNF_TNFRSF1B |
| 3707 SP1     | TNF   | LTBR     | TNF_LTBR     |
| 3708 SIRT1   | TNF   | TNFRSF1B | TNF_TNFRSF1B |
| 3709 SIRT1   | TNF   | LTBR     | TNF_LTBR     |
| 3710 LRRFIP1 | TNF   | TNFRSF1B | TNF_TNFRSF1B |
| 3711 LRRFIP1 | TNF   | LTBR     | TNF_LTBR     |



|      |        |         |           |                   |
|------|--------|---------|-----------|-------------------|
| 3712 | CEBPD  | TNF     | TNFRSF1B  | TNF_TNFRSF1B      |
| 3713 | CEBPD  | TNF     | LTBR      | TNF_LTBR          |
| 3714 | NFAT5  | TNF     | TNFRSF1B  | TNF_TNFRSF1B      |
| 3715 | NFAT5  | TNF     | LTBR      | TNF_LTBR          |
| 3716 | ATF2   | TNF     | TNFRSF1B  | TNF_TNFRSF1B      |
| 3717 | ATF2   | TNF     | LTBR      | TNF_LTBR          |
| 3718 | RELA   | TNF     | TNFRSF1B  | TNF_TNFRSF1B      |
| 3719 | RELA   | TNF     | LTBR      | TNF_LTBR          |
| 3720 | SPI1   | TNF     | TNFRSF1B  | TNF_TNFRSF1B      |
| 3721 | SPI1   | TNF     | LTBR      | TNF_LTBR          |
| 3722 | NR4A1  | TNF     | TNFRSF1B  | TNF_TNFRSF1B      |
| 3723 | NR4A1  | TNF     | LTBR      | TNF_LTBR          |
| 3724 | CEBPB  | TNF     | TNFRSF1B  | TNF_TNFRSF1B      |
| 3725 | CEBPB  | TNF     | LTBR      | TNF_LTBR          |
| 3726 | JUN    | TNF     | TNFRSF1B  | TNF_TNFRSF1B      |
| 3727 | JUN    | TNF     | LTBR      | TNF_LTBR          |
| 3728 | EGR1   | TNF     | TNFRSF1B  | TNF_TNFRSF1B      |
| 3729 | EGR1   | TNF     | LTBR      | TNF_LTBR          |
| 3730 | HMGB2  | TNF     | TNFRSF1B  | TNF_TNFRSF1B      |
| 3731 | HMGB2  | TNF     | LTBR      | TNF_LTBR          |
| 3732 | E2F1   | TNF     | TNFRSF1B  | TNF_TNFRSF1B      |
| 3733 | E2F1   | TNF     | LTBR      | TNF_LTBR          |
| 3734 | HDAC3  | TNF     | TNFRSF1B  | TNF_TNFRSF1B      |
| 3735 | HDAC3  | TNF     | LTBR      | TNF_LTBR          |
| 3736 | HDAC11 | TNF     | TNFRSF1B  | TNF_TNFRSF1B      |
| 3737 | HDAC11 | TNF     | LTBR      | TNF_LTBR          |
| 3738 | NFKB1  | TNF     | TNFRSF1B  | TNF_TNFRSF1B      |
| 3739 | NFKB1  | TNF     | LTBR      | TNF_LTBR          |
| 3740 | IRF5   | TNF     | TNFRSF1B  | TNF_TNFRSF1B      |
| 3741 | IRF5   | TNF     | LTBR      | TNF_LTBR          |
| 3742 | HSF1   | TNF     | TNFRSF1B  | TNF_TNFRSF1B      |
| 3743 | HSF1   | TNF     | LTBR      | TNF_LTBR          |
| 3744 | RELA   | TNFSF10 | TNFRSF10A | TNFSF10_TNFRSF10A |
| 3745 | RELA   | TNFSF10 | TNFRSF10D | TNFSF10_TNFRSF10D |
| 3746 | RELA   | TNFSF10 | TNFRSF10B | TNFSF10_TNFRSF10B |
| 3747 | RELA   | TNFSF10 | TNFRSF10C | TNFSF10_TNFRSF10C |
| 3748 | RELA   | TNFSF10 | TNFRSF11B | TNFSF10_TNFRSF11B |
| 3749 | NFKB1  | TNFSF10 | TNFRSF10A | TNFSF10_TNFRSF10A |
| 3750 | NFKB1  | TNFSF10 | TNFRSF10D | TNFSF10_TNFRSF10D |
| 3751 | NFKB1  | TNFSF10 | TNFRSF10B | TNFSF10_TNFRSF10B |
| 3752 | NFKB1  | TNFSF10 | TNFRSF10C | TNFSF10_TNFRSF10C |
| 3753 | NFKB1  | TNFSF10 | TNFRSF11B | TNFSF10_TNFRSF11B |
| 3754 | FOXO4  | TNFSF10 | TNFRSF10A | TNFSF10_TNFRSF10A |
| 3755 | FOXO4  | TNFSF10 | TNFRSF10D | TNFSF10_TNFRSF10D |
| 3756 | FOXO4  | TNFSF10 | TNFRSF10B | TNFSF10_TNFRSF10B |
| 3757 | FOXO4  | TNFSF10 | TNFRSF10C | TNFSF10_TNFRSF10C |
| 3758 | FOXO4  | TNFSF10 | TNFRSF11B | TNFSF10_TNFRSF11B |
| 3759 | SP1    | TNFSF10 | TNFRSF10A | TNFSF10_TNFRSF10A |
| 3760 | SP1    | TNFSF10 | TNFRSF10D | TNFSF10_TNFRSF10D |
| 3761 | SP1    | TNFSF10 | TNFRSF10B | TNFSF10_TNFRSF10B |
| 3762 | SP1    | TNFSF10 | TNFRSF10C | TNFSF10_TNFRSF10C |
| 3763 | SP1    | TNFSF10 | TNFRSF11B | TNFSF10_TNFRSF11B |
| 3764 | NFIL3  | TNFSF10 | TNFRSF10A | TNFSF10_TNFRSF10A |
| 3765 | NFIL3  | TNFSF10 | TNFRSF10D | TNFSF10_TNFRSF10D |
| 3766 | NFIL3  | TNFSF10 | TNFRSF10B | TNFSF10_TNFRSF10B |
| 3767 | NFIL3  | TNFSF10 | TNFRSF10C | TNFSF10_TNFRSF10C |
| 3768 | NFIL3  | TNFSF10 | TNFRSF11B | TNFSF10_TNFRSF11B |
| 3769 | EGR1   | TNFSF10 | TNFRSF10A | TNFSF10_TNFRSF10A |

|             |          |           |                    |
|-------------|----------|-----------|--------------------|
| 3770 EGR1   | TNFSF10  | TNFRSF10D | TNFSF10_TNFRSF10D  |
| 3771 EGR1   | TNFSF10  | TNFRSF10B | TNFSF10_TNFRSF10B  |
| 3772 EGR1   | TNFSF10  | TNFRSF10C | TNFSF10_TNFRSF10C  |
| 3773 EGR1   | TNFSF10  | TNFRSF11B | TNFSF10_TNFRSF11B  |
| 3774 FOXO3  | TNFSF10  | TNFRSF10A | TNFSF10_TNFRSF10A  |
| 3775 FOXO3  | TNFSF10  | TNFRSF10D | TNFSF10_TNFRSF10D  |
| 3776 FOXO3  | TNFSF10  | TNFRSF10B | TNFSF10_TNFRSF10B  |
| 3777 FOXO3  | TNFSF10  | TNFRSF10C | TNFSF10_TNFRSF10C  |
| 3778 FOXO3  | TNFSF10  | TNFRSF11B | TNFSF10_TNFRSF11B  |
| 3779 HDAC2  | TNFSF10  | TNFRSF10A | TNFSF10_TNFRSF10A  |
| 3780 HDAC2  | TNFSF10  | TNFRSF10D | TNFSF10_TNFRSF10D  |
| 3781 HDAC2  | TNFSF10  | TNFRSF10B | TNFSF10_TNFRSF10B  |
| 3782 HDAC2  | TNFSF10  | TNFRSF10C | TNFSF10_TNFRSF10C  |
| 3783 HDAC2  | TNFSF10  | TNFRSF11B | TNFSF10_TNFRSF11B  |
| 3784 FOXO1  | TNFSF10  | TNFRSF10A | TNFSF10_TNFRSF10A  |
| 3785 FOXO1  | TNFSF10  | TNFRSF10D | TNFSF10_TNFRSF10D  |
| 3786 FOXO1  | TNFSF10  | TNFRSF10B | TNFSF10_TNFRSF10B  |
| 3787 FOXO1  | TNFSF10  | TNFRSF10C | TNFSF10_TNFRSF10C  |
| 3788 FOXO1  | TNFSF10  | TNFRSF11B | TNFSF10_TNFRSF11B  |
| 3789 PML    | TNFSF10  | TNFRSF10A | TNFSF10_TNFRSF10A  |
| 3790 PML    | TNFSF10  | TNFRSF10D | TNFSF10_TNFRSF10D  |
| 3791 PML    | TNFSF10  | TNFRSF10B | TNFSF10_TNFRSF10B  |
| 3792 PML    | TNFSF10  | TNFRSF10C | TNFSF10_TNFRSF10C  |
| 3793 PML    | TNFSF10  | TNFRSF11B | TNFSF10_TNFRSF11B  |
| 3794 NFKBIA | TNFSF10  | TNFRSF10A | TNFSF10_TNFRSF10A  |
| 3795 NFKBIA | TNFSF10  | TNFRSF10D | TNFSF10_TNFRSF10D  |
| 3796 NFKBIA | TNFSF10  | TNFRSF10B | TNFSF10_TNFRSF10B  |
| 3797 NFKBIA | TNFSF10  | TNFRSF10C | TNFSF10_TNFRSF10C  |
| 3798 NFKBIA | TNFSF10  | TNFRSF11B | TNFSF10_TNFRSF11B  |
| 3799 IRF1   | TNFSF10  | TNFRSF10A | TNFSF10_TNFRSF10A  |
| 3800 IRF1   | TNFSF10  | TNFRSF10D | TNFSF10_TNFRSF10D  |
| 3801 IRF1   | TNFSF10  | TNFRSF10B | TNFSF10_TNFRSF10B  |
| 3802 IRF1   | TNFSF10  | TNFRSF10C | TNFSF10_TNFRSF10C  |
| 3803 IRF1   | TNFSF10  | TNFRSF11B | TNFSF10_TNFRSF11B  |
| 3804 DACH1  | TNFSF11  | TNFRSF11B | TNFSF11_TNFRSF11B  |
| 3805 HSF2   | TNFSF11  | TNFRSF11B | TNFSF11_TNFRSF11B  |
| 3806 E2F1   | TNFSF11  | TNFRSF11B | TNFSF11_TNFRSF11B  |
| 3807 STAT1  | TNFSF13B | TNFRSF13C | TNFSF13B_TNFRSF13C |
| 3808 STAT1  | TNFSF13B | TNFRSF17  | TNFSF13B_TNFRSF17  |
| 3809 STAT1  | TNFSF13B | TNFRSF13B | TNFSF13B_TNFRSF13B |
| 3810 NFKB1  | TNFSF13B | TNFRSF13C | TNFSF13B_TNFRSF13C |
| 3811 NFKB1  | TNFSF13B | TNFRSF17  | TNFSF13B_TNFRSF17  |
| 3812 NFKB1  | TNFSF13B | TNFRSF13B | TNFSF13B_TNFRSF13B |
| 3813 NFKB1  | TNFSF14  | LTBR      | TNFSF14_LTBR       |
| 3814 SP1    | TNFSF14  | LTBR      | TNFSF14_LTBR       |
| 3815 RELA   | TNFSF14  | LTBR      | TNFSF14_LTBR       |
| 3816 ETS1   | TNFSF14  | LTBR      | TNFSF14_LTBR       |
| 3817 HDAC11 | TNFSF4   | TNFRSF4   | TNFSF4_TNFRSF4     |
| 3818 NFKB1  | TSLP     | IL7R      | TSLP_IL7R          |
| 3819 RELA   | TSLP     | IL7R      | TSLP_IL7R          |
| 3820 JUN    | VCAM1    | ITGA9     | VCAM1_ITGA9        |
| 3821 JUN    | VCAM1    | ITGA4     | VCAM1_ITGA4        |
| 3822 JUN    | VCAM1    | ITGB7     | VCAM1_ITGB7        |
| 3823 JUN    | VCAM1    | ITGAD     | VCAM1_ITGAD        |
| 3824 JUN    | VCAM1    | ITGB1     | VCAM1_ITGB1        |
| 3825 JUN    | VCAM1    | ITGB2     | VCAM1_ITGB2        |
| 3826 HDAC4  | VCAM1    | ITGA9     | VCAM1_ITGA9        |
| 3827 HDAC4  | VCAM1    | ITGA4     | VCAM1_ITGA4        |

|      |        |       |       |             |
|------|--------|-------|-------|-------------|
| 3828 | HDAC4  | VCAM1 | ITGB7 | VCAM1_ITGB7 |
| 3829 | HDAC4  | VCAM1 | ITGAD | VCAM1_ITGAD |
| 3830 | HDAC4  | VCAM1 | ITGB1 | VCAM1_ITGB1 |
| 3831 | HDAC4  | VCAM1 | ITGB2 | VCAM1_ITGB2 |
| 3832 | IRF1   | VCAM1 | ITGA9 | VCAM1_ITGA9 |
| 3833 | IRF1   | VCAM1 | ITGA4 | VCAM1_ITGA4 |
| 3834 | IRF1   | VCAM1 | ITGB7 | VCAM1_ITGB7 |
| 3835 | IRF1   | VCAM1 | ITGAD | VCAM1_ITGAD |
| 3836 | IRF1   | VCAM1 | ITGB1 | VCAM1_ITGB1 |
| 3837 | IRF1   | VCAM1 | ITGB2 | VCAM1_ITGB2 |
| 3838 | RELA   | VCAM1 | ITGA9 | VCAM1_ITGA9 |
| 3839 | RELA   | VCAM1 | ITGA4 | VCAM1_ITGA4 |
| 3840 | RELA   | VCAM1 | ITGB7 | VCAM1_ITGB7 |
| 3841 | RELA   | VCAM1 | ITGAD | VCAM1_ITGAD |
| 3842 | RELA   | VCAM1 | ITGB1 | VCAM1_ITGB1 |
| 3843 | RELA   | VCAM1 | ITGB2 | VCAM1_ITGB2 |
| 3844 | NFKB1  | VCAM1 | ITGA9 | VCAM1_ITGA9 |
| 3845 | NFKB1  | VCAM1 | ITGA4 | VCAM1_ITGA4 |
| 3846 | NFKB1  | VCAM1 | ITGB7 | VCAM1_ITGB7 |
| 3847 | NFKB1  | VCAM1 | ITGAD | VCAM1_ITGAD |
| 3848 | NFKB1  | VCAM1 | ITGB1 | VCAM1_ITGB1 |
| 3849 | NFKB1  | VCAM1 | ITGB2 | VCAM1_ITGB2 |
| 3850 | POU2F1 | VCAM1 | ITGA9 | VCAM1_ITGA9 |
| 3851 | POU2F1 | VCAM1 | ITGA4 | VCAM1_ITGA4 |
| 3852 | POU2F1 | VCAM1 | ITGB7 | VCAM1_ITGB7 |
| 3853 | POU2F1 | VCAM1 | ITGAD | VCAM1_ITGAD |
| 3854 | POU2F1 | VCAM1 | ITGB1 | VCAM1_ITGB1 |
| 3855 | POU2F1 | VCAM1 | ITGB2 | VCAM1_ITGB2 |
| 3856 | IKBKB  | VCAM1 | ITGA9 | VCAM1_ITGA9 |
| 3857 | IKBKB  | VCAM1 | ITGA4 | VCAM1_ITGA4 |
| 3858 | IKBKB  | VCAM1 | ITGB7 | VCAM1_ITGB7 |
| 3859 | IKBKB  | VCAM1 | ITGAD | VCAM1_ITGAD |
| 3860 | IKBKB  | VCAM1 | ITGB1 | VCAM1_ITGB1 |
| 3861 | IKBKB  | VCAM1 | ITGB2 | VCAM1_ITGB2 |
| 3862 | HOXA9  | VCAM1 | ITGA9 | VCAM1_ITGA9 |
| 3863 | HOXA9  | VCAM1 | ITGA4 | VCAM1_ITGA4 |
| 3864 | HOXA9  | VCAM1 | ITGB7 | VCAM1_ITGB7 |
| 3865 | HOXA9  | VCAM1 | ITGAD | VCAM1_ITGAD |
| 3866 | HOXA9  | VCAM1 | ITGB1 | VCAM1_ITGB1 |
| 3867 | HOXA9  | VCAM1 | ITGB2 | VCAM1_ITGB2 |
| 3868 | EP300  | VCAM1 | ITGA9 | VCAM1_ITGA9 |
| 3869 | EP300  | VCAM1 | ITGA4 | VCAM1_ITGA4 |
| 3870 | EP300  | VCAM1 | ITGB7 | VCAM1_ITGB7 |
| 3871 | EP300  | VCAM1 | ITGAD | VCAM1_ITGAD |
| 3872 | EP300  | VCAM1 | ITGB1 | VCAM1_ITGB1 |
| 3873 | EP300  | VCAM1 | ITGB2 | VCAM1_ITGB2 |
| 3874 | TP53   | VCAN  | EGFR  | VCAN_EGFR   |
| 3875 | TP53   | VCAN  | ITGB1 | VCAN_ITGB1  |
| 3876 | TP53   | VCAN  | SELL  | VCAN_SELL   |
| 3877 | TP53   | VCAN  | SELP  | VCAN_SELP   |
| 3878 | TP53   | VCAN  | CD44  | VCAN_CD44   |
| 3879 | TP53   | VCAN  | ITGA4 | VCAN_ITGA4  |
| 3880 | TP53   | VCAN  | TLR2  | VCAN_TLR2   |
| 3881 | TP53   | VCAN  | TLR1  | VCAN_TLR1   |
| 3882 | TCF4   | VCAN  | EGFR  | VCAN_EGFR   |
| 3883 | TCF4   | VCAN  | ITGB1 | VCAN_ITGB1  |
| 3884 | TCF4   | VCAN  | SELL  | VCAN_SELL   |
| 3885 | TCF4   | VCAN  | SELP  | VCAN_SELP   |

|      |       |       |       |             |
|------|-------|-------|-------|-------------|
| 3886 | TCF4  | VCAN  | CD44  | VCAN_CD44   |
| 3887 | TCF4  | VCAN  | ITGA4 | VCAN_ITGA4  |
| 3888 | TCF4  | VCAN  | TLR2  | VCAN_TLR2   |
| 3889 | TCF4  | VCAN  | TLR1  | VCAN_TLR1   |
| 3890 | HDAC4 | VEGFA | NRP2  | VEGFA_NRP2  |
| 3891 | HDAC4 | VEGFA | RET   | VEGFA_RET   |
| 3892 | HDAC4 | VEGFA | NRP1  | VEGFA_NRP1  |
| 3893 | HDAC4 | VEGFA | EGFR  | VEGFA_EGFR  |
| 3894 | HDAC4 | VEGFA | EPHB2 | VEGFA_EPHB2 |
| 3895 | HDAC4 | VEGFA | ITGB1 | VEGFA_ITGB1 |
| 3896 | HDAC4 | VEGFA | KDR   | VEGFA_KDR   |
| 3897 | HDAC4 | VEGFA | TYRO3 | VEGFA_TYRO3 |
| 3898 | HDAC4 | VEGFA | ITGA9 | VEGFA_ITGA9 |
| 3899 | HDAC4 | VEGFA | ITGAV | VEGFA_ITGAV |
| 3900 | HDAC4 | VEGFA | SIRPA | VEGFA_SIRPA |
| 3901 | HDAC4 | VEGFA | GPC1  | VEGFA_GPC1  |
| 3902 | HDAC4 | VEGFA | FLT1  | VEGFA_FLT1  |
| 3903 | RB1   | VEGFA | NRP2  | VEGFA_NRP2  |
| 3904 | RB1   | VEGFA | RET   | VEGFA_RET   |
| 3905 | RB1   | VEGFA | NRP1  | VEGFA_NRP1  |
| 3906 | RB1   | VEGFA | EGFR  | VEGFA_EGFR  |
| 3907 | RB1   | VEGFA | EPHB2 | VEGFA_EPHB2 |
| 3908 | RB1   | VEGFA | ITGB1 | VEGFA_ITGB1 |
| 3909 | RB1   | VEGFA | KDR   | VEGFA_KDR   |
| 3910 | RB1   | VEGFA | TYRO3 | VEGFA_TYRO3 |
| 3911 | RB1   | VEGFA | ITGA9 | VEGFA_ITGA9 |
| 3912 | RB1   | VEGFA | ITGAV | VEGFA_ITGAV |
| 3913 | RB1   | VEGFA | SIRPA | VEGFA_SIRPA |
| 3914 | RB1   | VEGFA | GPC1  | VEGFA_GPC1  |
| 3915 | RB1   | VEGFA | FLT1  | VEGFA_FLT1  |
| 3916 | RELA  | VEGFA | NRP2  | VEGFA_NRP2  |
| 3917 | RELA  | VEGFA | RET   | VEGFA_RET   |
| 3918 | RELA  | VEGFA | NRP1  | VEGFA_NRP1  |
| 3919 | RELA  | VEGFA | EGFR  | VEGFA_EGFR  |
| 3920 | RELA  | VEGFA | EPHB2 | VEGFA_EPHB2 |
| 3921 | RELA  | VEGFA | ITGB1 | VEGFA_ITGB1 |
| 3922 | RELA  | VEGFA | KDR   | VEGFA_KDR   |
| 3923 | RELA  | VEGFA | TYRO3 | VEGFA_TYRO3 |
| 3924 | RELA  | VEGFA | ITGA9 | VEGFA_ITGA9 |
| 3925 | RELA  | VEGFA | ITGAV | VEGFA_ITGAV |
| 3926 | RELA  | VEGFA | SIRPA | VEGFA_SIRPA |
| 3927 | RELA  | VEGFA | GPC1  | VEGFA_GPC1  |
| 3928 | RELA  | VEGFA | FLT1  | VEGFA_FLT1  |
| 3929 | TEAD4 | VEGFA | NRP2  | VEGFA_NRP2  |
| 3930 | TEAD4 | VEGFA | RET   | VEGFA_RET   |
| 3931 | TEAD4 | VEGFA | NRP1  | VEGFA_NRP1  |
| 3932 | TEAD4 | VEGFA | EGFR  | VEGFA_EGFR  |
| 3933 | TEAD4 | VEGFA | EPHB2 | VEGFA_EPHB2 |
| 3934 | TEAD4 | VEGFA | ITGB1 | VEGFA_ITGB1 |
| 3935 | TEAD4 | VEGFA | KDR   | VEGFA_KDR   |
| 3936 | TEAD4 | VEGFA | TYRO3 | VEGFA_TYRO3 |
| 3937 | TEAD4 | VEGFA | ITGA9 | VEGFA_ITGA9 |
| 3938 | TEAD4 | VEGFA | ITGAV | VEGFA_ITGAV |
| 3939 | TEAD4 | VEGFA | SIRPA | VEGFA_SIRPA |
| 3940 | TEAD4 | VEGFA | GPC1  | VEGFA_GPC1  |
| 3941 | TEAD4 | VEGFA | FLT1  | VEGFA_FLT1  |
| 3942 | HDAC3 | VEGFA | NRP2  | VEGFA_NRP2  |
| 3943 | HDAC3 | VEGFA | RET   | VEGFA_RET   |

|            |       |       |             |
|------------|-------|-------|-------------|
| 3944 HDAC3 | VEGFA | NRP1  | VEGFA_NRP1  |
| 3945 HDAC3 | VEGFA | EGFR  | VEGFA_EGFR  |
| 3946 HDAC3 | VEGFA | EPHB2 | VEGFA_EPHB2 |
| 3947 HDAC3 | VEGFA | ITGB1 | VEGFA_ITGB1 |
| 3948 HDAC3 | VEGFA | KDR   | VEGFA_KDR   |
| 3949 HDAC3 | VEGFA | TYRO3 | VEGFA_TYRO3 |
| 3950 HDAC3 | VEGFA | ITGA9 | VEGFA_ITGA9 |
| 3951 HDAC3 | VEGFA | ITGAV | VEGFA_ITGAV |
| 3952 HDAC3 | VEGFA | SIRPA | VEGFA_SIRPA |
| 3953 HDAC3 | VEGFA | GPC1  | VEGFA_GPC1  |
| 3954 HDAC3 | VEGFA | FLT1  | VEGFA_FLT1  |
| 3955 ATM   | VEGFA | NRP2  | VEGFA_NRP2  |
| 3956 ATM   | VEGFA | RET   | VEGFA_RET   |
| 3957 ATM   | VEGFA | NRP1  | VEGFA_NRP1  |
| 3958 ATM   | VEGFA | EGFR  | VEGFA_EGFR  |
| 3959 ATM   | VEGFA | EPHB2 | VEGFA_EPHB2 |
| 3960 ATM   | VEGFA | ITGB1 | VEGFA_ITGB1 |
| 3961 ATM   | VEGFA | KDR   | VEGFA_KDR   |
| 3962 ATM   | VEGFA | TYRO3 | VEGFA_TYRO3 |
| 3963 ATM   | VEGFA | ITGA9 | VEGFA_ITGA9 |
| 3964 ATM   | VEGFA | ITGAV | VEGFA_ITGAV |
| 3965 ATM   | VEGFA | SIRPA | VEGFA_SIRPA |
| 3966 ATM   | VEGFA | GPC1  | VEGFA_GPC1  |
| 3967 ATM   | VEGFA | FLT1  | VEGFA_FLT1  |
| 3968 VHL   | VEGFA | NRP2  | VEGFA_NRP2  |
| 3969 VHL   | VEGFA | RET   | VEGFA_RET   |
| 3970 VHL   | VEGFA | NRP1  | VEGFA_NRP1  |
| 3971 VHL   | VEGFA | EGFR  | VEGFA_EGFR  |
| 3972 VHL   | VEGFA | EPHB2 | VEGFA_EPHB2 |
| 3973 VHL   | VEGFA | ITGB1 | VEGFA_ITGB1 |
| 3974 VHL   | VEGFA | KDR   | VEGFA_KDR   |
| 3975 VHL   | VEGFA | TYRO3 | VEGFA_TYRO3 |
| 3976 VHL   | VEGFA | ITGA9 | VEGFA_ITGA9 |
| 3977 VHL   | VEGFA | ITGAV | VEGFA_ITGAV |
| 3978 VHL   | VEGFA | SIRPA | VEGFA_SIRPA |
| 3979 VHL   | VEGFA | GPC1  | VEGFA_GPC1  |
| 3980 VHL   | VEGFA | FLT1  | VEGFA_FLT1  |
| 3981 E2F3  | VEGFA | NRP2  | VEGFA_NRP2  |
| 3982 E2F3  | VEGFA | RET   | VEGFA_RET   |
| 3983 E2F3  | VEGFA | NRP1  | VEGFA_NRP1  |
| 3984 E2F3  | VEGFA | EGFR  | VEGFA_EGFR  |
| 3985 E2F3  | VEGFA | EPHB2 | VEGFA_EPHB2 |
| 3986 E2F3  | VEGFA | ITGB1 | VEGFA_ITGB1 |
| 3987 E2F3  | VEGFA | KDR   | VEGFA_KDR   |
| 3988 E2F3  | VEGFA | TYRO3 | VEGFA_TYRO3 |
| 3989 E2F3  | VEGFA | ITGA9 | VEGFA_ITGA9 |
| 3990 E2F3  | VEGFA | ITGAV | VEGFA_ITGAV |
| 3991 E2F3  | VEGFA | SIRPA | VEGFA_SIRPA |
| 3992 E2F3  | VEGFA | GPC1  | VEGFA_GPC1  |
| 3993 E2F3  | VEGFA | FLT1  | VEGFA_FLT1  |
| 3994 ATF4  | VEGFA | NRP2  | VEGFA_NRP2  |
| 3995 ATF4  | VEGFA | RET   | VEGFA_RET   |
| 3996 ATF4  | VEGFA | NRP1  | VEGFA_NRP1  |
| 3997 ATF4  | VEGFA | EGFR  | VEGFA_EGFR  |
| 3998 ATF4  | VEGFA | EPHB2 | VEGFA_EPHB2 |
| 3999 ATF4  | VEGFA | ITGB1 | VEGFA_ITGB1 |
| 4000 ATF4  | VEGFA | KDR   | VEGFA_KDR   |
| 4001 ATF4  | VEGFA | TYRO3 | VEGFA_TYRO3 |

|      |        |       |       |             |
|------|--------|-------|-------|-------------|
| 4002 | ATF4   | VEGFA | ITGA9 | VEGFA_ITGA9 |
| 4003 | ATF4   | VEGFA | ITGAV | VEGFA_ITGAV |
| 4004 | ATF4   | VEGFA | SIRPA | VEGFA_SIRPA |
| 4005 | ATF4   | VEGFA | GPC1  | VEGFA_GPC1  |
| 4006 | ATF4   | VEGFA | FLT1  | VEGFA_FLT1  |
| 4007 | RUNX2  | VEGFA | NRP2  | VEGFA_NRP2  |
| 4008 | RUNX2  | VEGFA | RET   | VEGFA_RET   |
| 4009 | RUNX2  | VEGFA | NRP1  | VEGFA_NRP1  |
| 4010 | RUNX2  | VEGFA | EGFR  | VEGFA_EGFR  |
| 4011 | RUNX2  | VEGFA | EPHB2 | VEGFA_EPHB2 |
| 4012 | RUNX2  | VEGFA | ITGB1 | VEGFA_ITGB1 |
| 4013 | RUNX2  | VEGFA | KDR   | VEGFA_KDR   |
| 4014 | RUNX2  | VEGFA | TYRO3 | VEGFA_TYRO3 |
| 4015 | RUNX2  | VEGFA | ITGA9 | VEGFA_ITGA9 |
| 4016 | RUNX2  | VEGFA | ITGAV | VEGFA_ITGAV |
| 4017 | RUNX2  | VEGFA | SIRPA | VEGFA_SIRPA |
| 4018 | RUNX2  | VEGFA | GPC1  | VEGFA_GPC1  |
| 4019 | RUNX2  | VEGFA | FLT1  | VEGFA_FLT1  |
| 4020 | TFAP2A | VEGFA | NRP2  | VEGFA_NRP2  |
| 4021 | TFAP2A | VEGFA | RET   | VEGFA_RET   |
| 4022 | TFAP2A | VEGFA | NRP1  | VEGFA_NRP1  |
| 4023 | TFAP2A | VEGFA | EGFR  | VEGFA_EGFR  |
| 4024 | TFAP2A | VEGFA | EPHB2 | VEGFA_EPHB2 |
| 4025 | TFAP2A | VEGFA | ITGB1 | VEGFA_ITGB1 |
| 4026 | TFAP2A | VEGFA | KDR   | VEGFA_KDR   |
| 4027 | TFAP2A | VEGFA | TYRO3 | VEGFA_TYRO3 |
| 4028 | TFAP2A | VEGFA | ITGA9 | VEGFA_ITGA9 |
| 4029 | TFAP2A | VEGFA | ITGAV | VEGFA_ITGAV |
| 4030 | TFAP2A | VEGFA | SIRPA | VEGFA_SIRPA |
| 4031 | TFAP2A | VEGFA | GPC1  | VEGFA_GPC1  |
| 4032 | TFAP2A | VEGFA | FLT1  | VEGFA_FLT1  |
| 4033 | FOXQ1  | VEGFA | NRP2  | VEGFA_NRP2  |
| 4034 | FOXQ1  | VEGFA | RET   | VEGFA_RET   |
| 4035 | FOXQ1  | VEGFA | NRP1  | VEGFA_NRP1  |
| 4036 | FOXQ1  | VEGFA | EGFR  | VEGFA_EGFR  |
| 4037 | FOXQ1  | VEGFA | EPHB2 | VEGFA_EPHB2 |
| 4038 | FOXQ1  | VEGFA | ITGB1 | VEGFA_ITGB1 |
| 4039 | FOXQ1  | VEGFA | KDR   | VEGFA_KDR   |
| 4040 | FOXQ1  | VEGFA | TYRO3 | VEGFA_TYRO3 |
| 4041 | FOXQ1  | VEGFA | ITGA9 | VEGFA_ITGA9 |
| 4042 | FOXQ1  | VEGFA | ITGAV | VEGFA_ITGAV |
| 4043 | FOXQ1  | VEGFA | SIRPA | VEGFA_SIRPA |
| 4044 | FOXQ1  | VEGFA | GPC1  | VEGFA_GPC1  |
| 4045 | FOXQ1  | VEGFA | FLT1  | VEGFA_FLT1  |
| 4046 | HDGF   | VEGFA | NRP2  | VEGFA_NRP2  |
| 4047 | HDGF   | VEGFA | RET   | VEGFA_RET   |
| 4048 | HDGF   | VEGFA | NRP1  | VEGFA_NRP1  |
| 4049 | HDGF   | VEGFA | EGFR  | VEGFA_EGFR  |
| 4050 | HDGF   | VEGFA | EPHB2 | VEGFA_EPHB2 |
| 4051 | HDGF   | VEGFA | ITGB1 | VEGFA_ITGB1 |
| 4052 | HDGF   | VEGFA | KDR   | VEGFA_KDR   |
| 4053 | HDGF   | VEGFA | TYRO3 | VEGFA_TYRO3 |
| 4054 | HDGF   | VEGFA | ITGA9 | VEGFA_ITGA9 |
| 4055 | HDGF   | VEGFA | ITGAV | VEGFA_ITGAV |
| 4056 | HDGF   | VEGFA | SIRPA | VEGFA_SIRPA |
| 4057 | HDGF   | VEGFA | GPC1  | VEGFA_GPC1  |
| 4058 | HDGF   | VEGFA | FLT1  | VEGFA_FLT1  |
| 4059 | WT1    | VEGFA | NRP2  | VEGFA_NRP2  |

|             |       |       |             |
|-------------|-------|-------|-------------|
| 4060 WT1    | VEGFA | RET   | VEGFA_RET   |
| 4061 WT1    | VEGFA | NRP1  | VEGFA_NRP1  |
| 4062 WT1    | VEGFA | EGFR  | VEGFA_EGFR  |
| 4063 WT1    | VEGFA | EPHB2 | VEGFA_EPHB2 |
| 4064 WT1    | VEGFA | ITGB1 | VEGFA_ITGB1 |
| 4065 WT1    | VEGFA | KDR   | VEGFA_KDR   |
| 4066 WT1    | VEGFA | TYRO3 | VEGFA_TYRO3 |
| 4067 WT1    | VEGFA | ITGA9 | VEGFA_ITGA9 |
| 4068 WT1    | VEGFA | ITGAV | VEGFA_ITGAV |
| 4069 WT1    | VEGFA | SIRPA | VEGFA_SIRPA |
| 4070 WT1    | VEGFA | GPC1  | VEGFA_GPC1  |
| 4071 WT1    | VEGFA | FLT1  | VEGFA_FLT1  |
| 4072 HOXB7  | VEGFA | NRP2  | VEGFA_NRP2  |
| 4073 HOXB7  | VEGFA | RET   | VEGFA_RET   |
| 4074 HOXB7  | VEGFA | NRP1  | VEGFA_NRP1  |
| 4075 HOXB7  | VEGFA | EGFR  | VEGFA_EGFR  |
| 4076 HOXB7  | VEGFA | EPHB2 | VEGFA_EPHB2 |
| 4077 HOXB7  | VEGFA | ITGB1 | VEGFA_ITGB1 |
| 4078 HOXB7  | VEGFA | KDR   | VEGFA_KDR   |
| 4079 HOXB7  | VEGFA | TYRO3 | VEGFA_TYRO3 |
| 4080 HOXB7  | VEGFA | ITGA9 | VEGFA_ITGA9 |
| 4081 HOXB7  | VEGFA | ITGAV | VEGFA_ITGAV |
| 4082 HOXB7  | VEGFA | SIRPA | VEGFA_SIRPA |
| 4083 HOXB7  | VEGFA | GPC1  | VEGFA_GPC1  |
| 4084 HOXB7  | VEGFA | FLT1  | VEGFA_FLT1  |
| 4085 ZFP36  | VEGFA | NRP2  | VEGFA_NRP2  |
| 4086 ZFP36  | VEGFA | RET   | VEGFA_RET   |
| 4087 ZFP36  | VEGFA | NRP1  | VEGFA_NRP1  |
| 4088 ZFP36  | VEGFA | EGFR  | VEGFA_EGFR  |
| 4089 ZFP36  | VEGFA | EPHB2 | VEGFA_EPHB2 |
| 4090 ZFP36  | VEGFA | ITGB1 | VEGFA_ITGB1 |
| 4091 ZFP36  | VEGFA | KDR   | VEGFA_KDR   |
| 4092 ZFP36  | VEGFA | TYRO3 | VEGFA_TYRO3 |
| 4093 ZFP36  | VEGFA | ITGA9 | VEGFA_ITGA9 |
| 4094 ZFP36  | VEGFA | ITGAV | VEGFA_ITGAV |
| 4095 ZFP36  | VEGFA | SIRPA | VEGFA_SIRPA |
| 4096 ZFP36  | VEGFA | GPC1  | VEGFA_GPC1  |
| 4097 ZFP36  | VEGFA | FLT1  | VEGFA_FLT1  |
| 4098 EPAS1  | VEGFA | NRP2  | VEGFA_NRP2  |
| 4099 EPAS1  | VEGFA | RET   | VEGFA_RET   |
| 4100 EPAS1  | VEGFA | NRP1  | VEGFA_NRP1  |
| 4101 EPAS1  | VEGFA | EGFR  | VEGFA_EGFR  |
| 4102 EPAS1  | VEGFA | EPHB2 | VEGFA_EPHB2 |
| 4103 EPAS1  | VEGFA | ITGB1 | VEGFA_ITGB1 |
| 4104 EPAS1  | VEGFA | KDR   | VEGFA_KDR   |
| 4105 EPAS1  | VEGFA | TYRO3 | VEGFA_TYRO3 |
| 4106 EPAS1  | VEGFA | ITGA9 | VEGFA_ITGA9 |
| 4107 EPAS1  | VEGFA | ITGAV | VEGFA_ITGAV |
| 4108 EPAS1  | VEGFA | SIRPA | VEGFA_SIRPA |
| 4109 EPAS1  | VEGFA | GPC1  | VEGFA_GPC1  |
| 4110 EPAS1  | VEGFA | FLT1  | VEGFA_FLT1  |
| 4111 NKX3-1 | VEGFA | NRP2  | VEGFA_NRP2  |
| 4112 NKX3-1 | VEGFA | RET   | VEGFA_RET   |
| 4113 NKX3-1 | VEGFA | NRP1  | VEGFA_NRP1  |
| 4114 NKX3-1 | VEGFA | EGFR  | VEGFA_EGFR  |
| 4115 NKX3-1 | VEGFA | EPHB2 | VEGFA_EPHB2 |
| 4116 NKX3-1 | VEGFA | ITGB1 | VEGFA_ITGB1 |
| 4117 NKX3-1 | VEGFA | KDR   | VEGFA_KDR   |

|             |       |       |             |
|-------------|-------|-------|-------------|
| 4118 NKX3-1 | VEGFA | TYRO3 | VEGFA_TYRO3 |
| 4119 NKX3-1 | VEGFA | ITGA9 | VEGFA_ITGA9 |
| 4120 NKX3-1 | VEGFA | ITGAV | VEGFA_ITGAV |
| 4121 NKX3-1 | VEGFA | SIRPA | VEGFA_SIRPA |
| 4122 NKX3-1 | VEGFA | GPC1  | VEGFA_GPC1  |
| 4123 NKX3-1 | VEGFA | FLT1  | VEGFA_FLT1  |
| 4124 PTTG1  | VEGFA | NRP2  | VEGFA_NRP2  |
| 4125 PTTG1  | VEGFA | RET   | VEGFA_RET   |
| 4126 PTTG1  | VEGFA | NRP1  | VEGFA_NRP1  |
| 4127 PTTG1  | VEGFA | EGFR  | VEGFA_EGFR  |
| 4128 PTTG1  | VEGFA | EPHB2 | VEGFA_EPHB2 |
| 4129 PTTG1  | VEGFA | ITGB1 | VEGFA_ITGB1 |
| 4130 PTTG1  | VEGFA | KDR   | VEGFA_KDR   |
| 4131 PTTG1  | VEGFA | TYRO3 | VEGFA_TYRO3 |
| 4132 PTTG1  | VEGFA | ITGA9 | VEGFA_ITGA9 |
| 4133 PTTG1  | VEGFA | ITGAV | VEGFA_ITGAV |
| 4134 PTTG1  | VEGFA | SIRPA | VEGFA_SIRPA |
| 4135 PTTG1  | VEGFA | GPC1  | VEGFA_GPC1  |
| 4136 PTTG1  | VEGFA | FLT1  | VEGFA_FLT1  |
| 4137 ZNF24  | VEGFA | NRP2  | VEGFA_NRP2  |
| 4138 ZNF24  | VEGFA | RET   | VEGFA_RET   |
| 4139 ZNF24  | VEGFA | NRP1  | VEGFA_NRP1  |
| 4140 ZNF24  | VEGFA | EGFR  | VEGFA_EGFR  |
| 4141 ZNF24  | VEGFA | EPHB2 | VEGFA_EPHB2 |
| 4142 ZNF24  | VEGFA | ITGB1 | VEGFA_ITGB1 |
| 4143 ZNF24  | VEGFA | KDR   | VEGFA_KDR   |
| 4144 ZNF24  | VEGFA | TYRO3 | VEGFA_TYRO3 |
| 4145 ZNF24  | VEGFA | ITGA9 | VEGFA_ITGA9 |
| 4146 ZNF24  | VEGFA | ITGAV | VEGFA_ITGAV |
| 4147 ZNF24  | VEGFA | SIRPA | VEGFA_SIRPA |
| 4148 ZNF24  | VEGFA | GPC1  | VEGFA_GPC1  |
| 4149 ZNF24  | VEGFA | FLT1  | VEGFA_FLT1  |
| 4150 HIPK2  | VEGFA | NRP2  | VEGFA_NRP2  |
| 4151 HIPK2  | VEGFA | RET   | VEGFA_RET   |
| 4152 HIPK2  | VEGFA | NRP1  | VEGFA_NRP1  |
| 4153 HIPK2  | VEGFA | EGFR  | VEGFA_EGFR  |
| 4154 HIPK2  | VEGFA | EPHB2 | VEGFA_EPHB2 |
| 4155 HIPK2  | VEGFA | ITGB1 | VEGFA_ITGB1 |
| 4156 HIPK2  | VEGFA | KDR   | VEGFA_KDR   |
| 4157 HIPK2  | VEGFA | TYRO3 | VEGFA_TYRO3 |
| 4158 HIPK2  | VEGFA | ITGA9 | VEGFA_ITGA9 |
| 4159 HIPK2  | VEGFA | ITGAV | VEGFA_ITGAV |
| 4160 HIPK2  | VEGFA | SIRPA | VEGFA_SIRPA |
| 4161 HIPK2  | VEGFA | GPC1  | VEGFA_GPC1  |
| 4162 HIPK2  | VEGFA | FLT1  | VEGFA_FLT1  |
| 4163 HEXIM1 | VEGFA | NRP2  | VEGFA_NRP2  |
| 4164 HEXIM1 | VEGFA | RET   | VEGFA_RET   |
| 4165 HEXIM1 | VEGFA | NRP1  | VEGFA_NRP1  |
| 4166 HEXIM1 | VEGFA | EGFR  | VEGFA_EGFR  |
| 4167 HEXIM1 | VEGFA | EPHB2 | VEGFA_EPHB2 |
| 4168 HEXIM1 | VEGFA | ITGB1 | VEGFA_ITGB1 |
| 4169 HEXIM1 | VEGFA | KDR   | VEGFA_KDR   |
| 4170 HEXIM1 | VEGFA | TYRO3 | VEGFA_TYRO3 |
| 4171 HEXIM1 | VEGFA | ITGA9 | VEGFA_ITGA9 |
| 4172 HEXIM1 | VEGFA | ITGAV | VEGFA_ITGAV |
| 4173 HEXIM1 | VEGFA | SIRPA | VEGFA_SIRPA |
| 4174 HEXIM1 | VEGFA | GPC1  | VEGFA_GPC1  |
| 4175 HEXIM1 | VEGFA | FLT1  | VEGFA_FLT1  |



|      |       |       |       |             |
|------|-------|-------|-------|-------------|
| 4176 | NFKB1 | VEGFA | NRP2  | VEGFA_NRP2  |
| 4177 | NFKB1 | VEGFA | RET   | VEGFA_RET   |
| 4178 | NFKB1 | VEGFA | NRP1  | VEGFA_NRP1  |
| 4179 | NFKB1 | VEGFA | EGFR  | VEGFA_EGFR  |
| 4180 | NFKB1 | VEGFA | EPHB2 | VEGFA_EPHB2 |
| 4181 | NFKB1 | VEGFA | ITGB1 | VEGFA_ITGB1 |
| 4182 | NFKB1 | VEGFA | KDR   | VEGFA_KDR   |
| 4183 | NFKB1 | VEGFA | TYRO3 | VEGFA_TYRO3 |
| 4184 | NFKB1 | VEGFA | ITGA9 | VEGFA_ITGA9 |
| 4185 | NFKB1 | VEGFA | ITGAV | VEGFA_ITGAV |
| 4186 | NFKB1 | VEGFA | SIRPA | VEGFA_SIRPA |
| 4187 | NFKB1 | VEGFA | GPC1  | VEGFA_GPC1  |
| 4188 | NFKB1 | VEGFA | FLT1  | VEGFA_FLT1  |
| 4189 | MYC   | VEGFA | NRP2  | VEGFA_NRP2  |
| 4190 | MYC   | VEGFA | RET   | VEGFA_RET   |
| 4191 | MYC   | VEGFA | NRP1  | VEGFA_NRP1  |
| 4192 | MYC   | VEGFA | EGFR  | VEGFA_EGFR  |
| 4193 | MYC   | VEGFA | EPHB2 | VEGFA_EPHB2 |
| 4194 | MYC   | VEGFA | ITGB1 | VEGFA_ITGB1 |
| 4195 | MYC   | VEGFA | KDR   | VEGFA_KDR   |
| 4196 | MYC   | VEGFA | TYRO3 | VEGFA_TYRO3 |
| 4197 | MYC   | VEGFA | ITGA9 | VEGFA_ITGA9 |
| 4198 | MYC   | VEGFA | ITGAV | VEGFA_ITGAV |
| 4199 | MYC   | VEGFA | SIRPA | VEGFA_SIRPA |
| 4200 | MYC   | VEGFA | GPC1  | VEGFA_GPC1  |
| 4201 | MYC   | VEGFA | FLT1  | VEGFA_FLT1  |
| 4202 | PGR   | VEGFA | NRP2  | VEGFA_NRP2  |
| 4203 | PGR   | VEGFA | RET   | VEGFA_RET   |
| 4204 | PGR   | VEGFA | NRP1  | VEGFA_NRP1  |
| 4205 | PGR   | VEGFA | EGFR  | VEGFA_EGFR  |
| 4206 | PGR   | VEGFA | EPHB2 | VEGFA_EPHB2 |
| 4207 | PGR   | VEGFA | ITGB1 | VEGFA_ITGB1 |
| 4208 | PGR   | VEGFA | KDR   | VEGFA_KDR   |
| 4209 | PGR   | VEGFA | TYRO3 | VEGFA_TYRO3 |
| 4210 | PGR   | VEGFA | ITGA9 | VEGFA_ITGA9 |
| 4211 | PGR   | VEGFA | ITGAV | VEGFA_ITGAV |
| 4212 | PGR   | VEGFA | SIRPA | VEGFA_SIRPA |
| 4213 | PGR   | VEGFA | GPC1  | VEGFA_GPC1  |
| 4214 | PGR   | VEGFA | FLT1  | VEGFA_FLT1  |
| 4215 | ESR1  | VEGFA | NRP2  | VEGFA_NRP2  |
| 4216 | ESR1  | VEGFA | RET   | VEGFA_RET   |
| 4217 | ESR1  | VEGFA | NRP1  | VEGFA_NRP1  |
| 4218 | ESR1  | VEGFA | EGFR  | VEGFA_EGFR  |
| 4219 | ESR1  | VEGFA | EPHB2 | VEGFA_EPHB2 |
| 4220 | ESR1  | VEGFA | ITGB1 | VEGFA_ITGB1 |
| 4221 | ESR1  | VEGFA | KDR   | VEGFA_KDR   |
| 4222 | ESR1  | VEGFA | TYRO3 | VEGFA_TYRO3 |
| 4223 | ESR1  | VEGFA | ITGA9 | VEGFA_ITGA9 |
| 4224 | ESR1  | VEGFA | ITGAV | VEGFA_ITGAV |
| 4225 | ESR1  | VEGFA | SIRPA | VEGFA_SIRPA |
| 4226 | ESR1  | VEGFA | GPC1  | VEGFA_GPC1  |
| 4227 | ESR1  | VEGFA | FLT1  | VEGFA_FLT1  |
| 4228 | SP1   | VEGFA | NRP2  | VEGFA_NRP2  |
| 4229 | SP1   | VEGFA | RET   | VEGFA_RET   |
| 4230 | SP1   | VEGFA | NRP1  | VEGFA_NRP1  |
| 4231 | SP1   | VEGFA | EGFR  | VEGFA_EGFR  |
| 4232 | SP1   | VEGFA | EPHB2 | VEGFA_EPHB2 |
| 4233 | SP1   | VEGFA | ITGB1 | VEGFA_ITGB1 |

|            |       |       |             |
|------------|-------|-------|-------------|
| 4234 SP1   | VEGFA | KDR   | VEGFA_KDR   |
| 4235 SP1   | VEGFA | TYRO3 | VEGFA_TYRO3 |
| 4236 SP1   | VEGFA | ITGA9 | VEGFA_ITGA9 |
| 4237 SP1   | VEGFA | ITGAV | VEGFA_ITGAV |
| 4238 SP1   | VEGFA | SIRPA | VEGFA_SIRPA |
| 4239 SP1   | VEGFA | GPC1  | VEGFA_GPC1  |
| 4240 SP1   | VEGFA | FLT1  | VEGFA_FLT1  |
| 4241 FOXO3 | VEGFA | NRP2  | VEGFA_NRP2  |
| 4242 FOXO3 | VEGFA | RET   | VEGFA_RET   |
| 4243 FOXO3 | VEGFA | NRP1  | VEGFA_NRP1  |
| 4244 FOXO3 | VEGFA | EGFR  | VEGFA_EGFR  |
| 4245 FOXO3 | VEGFA | EPHB2 | VEGFA_EPHB2 |
| 4246 FOXO3 | VEGFA | ITGB1 | VEGFA_ITGB1 |
| 4247 FOXO3 | VEGFA | KDR   | VEGFA_KDR   |
| 4248 FOXO3 | VEGFA | TYRO3 | VEGFA_TYRO3 |
| 4249 FOXO3 | VEGFA | ITGA9 | VEGFA_ITGA9 |
| 4250 FOXO3 | VEGFA | ITGAV | VEGFA_ITGAV |
| 4251 FOXO3 | VEGFA | SIRPA | VEGFA_SIRPA |
| 4252 FOXO3 | VEGFA | GPC1  | VEGFA_GPC1  |
| 4253 FOXO3 | VEGFA | FLT1  | VEGFA_FLT1  |
| 4254 ESR2  | VEGFA | NRP2  | VEGFA_NRP2  |
| 4255 ESR2  | VEGFA | RET   | VEGFA_RET   |
| 4256 ESR2  | VEGFA | NRP1  | VEGFA_NRP1  |
| 4257 ESR2  | VEGFA | EGFR  | VEGFA_EGFR  |
| 4258 ESR2  | VEGFA | EPHB2 | VEGFA_EPHB2 |
| 4259 ESR2  | VEGFA | ITGB1 | VEGFA_ITGB1 |
| 4260 ESR2  | VEGFA | KDR   | VEGFA_KDR   |
| 4261 ESR2  | VEGFA | TYRO3 | VEGFA_TYRO3 |
| 4262 ESR2  | VEGFA | ITGA9 | VEGFA_ITGA9 |
| 4263 ESR2  | VEGFA | ITGAV | VEGFA_ITGAV |
| 4264 ESR2  | VEGFA | SIRPA | VEGFA_SIRPA |
| 4265 ESR2  | VEGFA | GPC1  | VEGFA_GPC1  |
| 4266 ESR2  | VEGFA | FLT1  | VEGFA_FLT1  |
| 4267 BRCA1 | VEGFA | NRP2  | VEGFA_NRP2  |
| 4268 BRCA1 | VEGFA | RET   | VEGFA_RET   |
| 4269 BRCA1 | VEGFA | NRP1  | VEGFA_NRP1  |
| 4270 BRCA1 | VEGFA | EGFR  | VEGFA_EGFR  |
| 4271 BRCA1 | VEGFA | EPHB2 | VEGFA_EPHB2 |
| 4272 BRCA1 | VEGFA | ITGB1 | VEGFA_ITGB1 |
| 4273 BRCA1 | VEGFA | KDR   | VEGFA_KDR   |
| 4274 BRCA1 | VEGFA | TYRO3 | VEGFA_TYRO3 |
| 4275 BRCA1 | VEGFA | ITGA9 | VEGFA_ITGA9 |
| 4276 BRCA1 | VEGFA | ITGAV | VEGFA_ITGAV |
| 4277 BRCA1 | VEGFA | SIRPA | VEGFA_SIRPA |
| 4278 BRCA1 | VEGFA | GPC1  | VEGFA_GPC1  |
| 4279 BRCA1 | VEGFA | FLT1  | VEGFA_FLT1  |
| 4280 HNF1A | VEGFA | NRP2  | VEGFA_NRP2  |
| 4281 HNF1A | VEGFA | RET   | VEGFA_RET   |
| 4282 HNF1A | VEGFA | NRP1  | VEGFA_NRP1  |
| 4283 HNF1A | VEGFA | EGFR  | VEGFA_EGFR  |
| 4284 HNF1A | VEGFA | EPHB2 | VEGFA_EPHB2 |
| 4285 HNF1A | VEGFA | ITGB1 | VEGFA_ITGB1 |
| 4286 HNF1A | VEGFA | KDR   | VEGFA_KDR   |
| 4287 HNF1A | VEGFA | TYRO3 | VEGFA_TYRO3 |
| 4288 HNF1A | VEGFA | ITGA9 | VEGFA_ITGA9 |
| 4289 HNF1A | VEGFA | ITGAV | VEGFA_ITGAV |
| 4290 HNF1A | VEGFA | SIRPA | VEGFA_SIRPA |
| 4291 HNF1A | VEGFA | GPC1  | VEGFA_GPC1  |

|            |       |       |             |
|------------|-------|-------|-------------|
| 4292 HNF1A | VEGFA | FLT1  | VEGFA_FLT1  |
| 4293 EGR1  | VEGFA | NRP2  | VEGFA_NRP2  |
| 4294 EGR1  | VEGFA | RET   | VEGFA_RET   |
| 4295 EGR1  | VEGFA | NRP1  | VEGFA_NRP1  |
| 4296 EGR1  | VEGFA | EGFR  | VEGFA_EGFR  |
| 4297 EGR1  | VEGFA | EPHB2 | VEGFA_EPHB2 |
| 4298 EGR1  | VEGFA | ITGB1 | VEGFA_ITGB1 |
| 4299 EGR1  | VEGFA | KDR   | VEGFA_KDR   |
| 4300 EGR1  | VEGFA | TYRO3 | VEGFA_TYRO3 |
| 4301 EGR1  | VEGFA | ITGA9 | VEGFA_ITGA9 |
| 4302 EGR1  | VEGFA | ITGAV | VEGFA_ITGAV |
| 4303 EGR1  | VEGFA | SIRPA | VEGFA_SIRPA |
| 4304 EGR1  | VEGFA | GPC1  | VEGFA_GPC1  |
| 4305 EGR1  | VEGFA | FLT1  | VEGFA_FLT1  |
| 4306 HIF1A | VEGFA | NRP2  | VEGFA_NRP2  |
| 4307 HIF1A | VEGFA | RET   | VEGFA_RET   |
| 4308 HIF1A | VEGFA | NRP1  | VEGFA_NRP1  |
| 4309 HIF1A | VEGFA | EGFR  | VEGFA_EGFR  |
| 4310 HIF1A | VEGFA | EPHB2 | VEGFA_EPHB2 |
| 4311 HIF1A | VEGFA | ITGB1 | VEGFA_ITGB1 |
| 4312 HIF1A | VEGFA | KDR   | VEGFA_KDR   |
| 4313 HIF1A | VEGFA | TYRO3 | VEGFA_TYRO3 |
| 4314 HIF1A | VEGFA | ITGA9 | VEGFA_ITGA9 |
| 4315 HIF1A | VEGFA | ITGAV | VEGFA_ITGAV |
| 4316 HIF1A | VEGFA | SIRPA | VEGFA_SIRPA |
| 4317 HIF1A | VEGFA | GPC1  | VEGFA_GPC1  |
| 4318 HIF1A | VEGFA | FLT1  | VEGFA_FLT1  |
| 4319 E2F1  | VEGFA | NRP2  | VEGFA_NRP2  |
| 4320 E2F1  | VEGFA | RET   | VEGFA_RET   |
| 4321 E2F1  | VEGFA | NRP1  | VEGFA_NRP1  |
| 4322 E2F1  | VEGFA | EGFR  | VEGFA_EGFR  |
| 4323 E2F1  | VEGFA | EPHB2 | VEGFA_EPHB2 |
| 4324 E2F1  | VEGFA | ITGB1 | VEGFA_ITGB1 |
| 4325 E2F1  | VEGFA | KDR   | VEGFA_KDR   |
| 4326 E2F1  | VEGFA | TYRO3 | VEGFA_TYRO3 |
| 4327 E2F1  | VEGFA | ITGA9 | VEGFA_ITGA9 |
| 4328 E2F1  | VEGFA | ITGAV | VEGFA_ITGAV |
| 4329 E2F1  | VEGFA | SIRPA | VEGFA_SIRPA |
| 4330 E2F1  | VEGFA | GPC1  | VEGFA_GPC1  |
| 4331 E2F1  | VEGFA | FLT1  | VEGFA_FLT1  |
| 4332 SMAD3 | VEGFA | NRP2  | VEGFA_NRP2  |
| 4333 SMAD3 | VEGFA | RET   | VEGFA_RET   |
| 4334 SMAD3 | VEGFA | NRP1  | VEGFA_NRP1  |
| 4335 SMAD3 | VEGFA | EGFR  | VEGFA_EGFR  |
| 4336 SMAD3 | VEGFA | EPHB2 | VEGFA_EPHB2 |
| 4337 SMAD3 | VEGFA | ITGB1 | VEGFA_ITGB1 |
| 4338 SMAD3 | VEGFA | KDR   | VEGFA_KDR   |
| 4339 SMAD3 | VEGFA | TYRO3 | VEGFA_TYRO3 |
| 4340 SMAD3 | VEGFA | ITGA9 | VEGFA_ITGA9 |
| 4341 SMAD3 | VEGFA | ITGAV | VEGFA_ITGAV |
| 4342 SMAD3 | VEGFA | SIRPA | VEGFA_SIRPA |
| 4343 SMAD3 | VEGFA | GPC1  | VEGFA_GPC1  |
| 4344 SMAD3 | VEGFA | FLT1  | VEGFA_FLT1  |
| 4345 UHRF1 | VEGFA | NRP2  | VEGFA_NRP2  |
| 4346 UHRF1 | VEGFA | RET   | VEGFA_RET   |
| 4347 UHRF1 | VEGFA | NRP1  | VEGFA_NRP1  |
| 4348 UHRF1 | VEGFA | EGFR  | VEGFA_EGFR  |
| 4349 UHRF1 | VEGFA | EPHB2 | VEGFA_EPHB2 |

|            |       |       |             |
|------------|-------|-------|-------------|
| 4350 UHRF1 | VEGFA | ITGB1 | VEGFA_ITGB1 |
| 4351 UHRF1 | VEGFA | KDR   | VEGFA_KDR   |
| 4352 UHRF1 | VEGFA | TYRO3 | VEGFA_TYRO3 |
| 4353 UHRF1 | VEGFA | ITGA9 | VEGFA_ITGA9 |
| 4354 UHRF1 | VEGFA | ITGAV | VEGFA_ITGAV |
| 4355 UHRF1 | VEGFA | SIRPA | VEGFA_SIRPA |
| 4356 UHRF1 | VEGFA | GPC1  | VEGFA_GPC1  |
| 4357 UHRF1 | VEGFA | FLT1  | VEGFA_FLT1  |
| 4358 NR1H4 | VEGFA | NRP2  | VEGFA_NRP2  |
| 4359 NR1H4 | VEGFA | RET   | VEGFA_RET   |
| 4360 NR1H4 | VEGFA | NRP1  | VEGFA_NRP1  |
| 4361 NR1H4 | VEGFA | EGFR  | VEGFA_EGFR  |
| 4362 NR1H4 | VEGFA | EPHB2 | VEGFA_EPHB2 |
| 4363 NR1H4 | VEGFA | ITGB1 | VEGFA_ITGB1 |
| 4364 NR1H4 | VEGFA | KDR   | VEGFA_KDR   |
| 4365 NR1H4 | VEGFA | TYRO3 | VEGFA_TYRO3 |
| 4366 NR1H4 | VEGFA | ITGA9 | VEGFA_ITGA9 |
| 4367 NR1H4 | VEGFA | ITGAV | VEGFA_ITGAV |
| 4368 NR1H4 | VEGFA | SIRPA | VEGFA_SIRPA |
| 4369 NR1H4 | VEGFA | GPC1  | VEGFA_GPC1  |
| 4370 NR1H4 | VEGFA | FLT1  | VEGFA_FLT1  |
| 4371 FOXM1 | VEGFA | NRP2  | VEGFA_NRP2  |
| 4372 FOXM1 | VEGFA | RET   | VEGFA_RET   |
| 4373 FOXM1 | VEGFA | NRP1  | VEGFA_NRP1  |
| 4374 FOXM1 | VEGFA | EGFR  | VEGFA_EGFR  |
| 4375 FOXM1 | VEGFA | EPHB2 | VEGFA_EPHB2 |
| 4376 FOXM1 | VEGFA | ITGB1 | VEGFA_ITGB1 |
| 4377 FOXM1 | VEGFA | KDR   | VEGFA_KDR   |
| 4378 FOXM1 | VEGFA | TYRO3 | VEGFA_TYRO3 |
| 4379 FOXM1 | VEGFA | ITGA9 | VEGFA_ITGA9 |
| 4380 FOXM1 | VEGFA | ITGAV | VEGFA_ITGAV |
| 4381 FOXM1 | VEGFA | SIRPA | VEGFA_SIRPA |
| 4382 FOXM1 | VEGFA | GPC1  | VEGFA_GPC1  |
| 4383 FOXM1 | VEGFA | FLT1  | VEGFA_FLT1  |
| 4384 XBP1  | VEGFA | NRP2  | VEGFA_NRP2  |
| 4385 XBP1  | VEGFA | RET   | VEGFA_RET   |
| 4386 XBP1  | VEGFA | NRP1  | VEGFA_NRP1  |
| 4387 XBP1  | VEGFA | EGFR  | VEGFA_EGFR  |
| 4388 XBP1  | VEGFA | EPHB2 | VEGFA_EPHB2 |
| 4389 XBP1  | VEGFA | ITGB1 | VEGFA_ITGB1 |
| 4390 XBP1  | VEGFA | KDR   | VEGFA_KDR   |
| 4391 XBP1  | VEGFA | TYRO3 | VEGFA_TYRO3 |
| 4392 XBP1  | VEGFA | ITGA9 | VEGFA_ITGA9 |
| 4393 XBP1  | VEGFA | ITGAV | VEGFA_ITGAV |
| 4394 XBP1  | VEGFA | SIRPA | VEGFA_SIRPA |
| 4395 XBP1  | VEGFA | GPC1  | VEGFA_GPC1  |
| 4396 XBP1  | VEGFA | FLT1  | VEGFA_FLT1  |
| 4397 COPS5 | VEGFA | NRP2  | VEGFA_NRP2  |
| 4398 COPS5 | VEGFA | RET   | VEGFA_RET   |
| 4399 COPS5 | VEGFA | NRP1  | VEGFA_NRP1  |
| 4400 COPS5 | VEGFA | EGFR  | VEGFA_EGFR  |
| 4401 COPS5 | VEGFA | EPHB2 | VEGFA_EPHB2 |
| 4402 COPS5 | VEGFA | ITGB1 | VEGFA_ITGB1 |
| 4403 COPS5 | VEGFA | KDR   | VEGFA_KDR   |
| 4404 COPS5 | VEGFA | TYRO3 | VEGFA_TYRO3 |
| 4405 COPS5 | VEGFA | ITGA9 | VEGFA_ITGA9 |
| 4406 COPS5 | VEGFA | ITGAV | VEGFA_ITGAV |
| 4407 COPS5 | VEGFA | SIRPA | VEGFA_SIRPA |

|            |       |       |             |
|------------|-------|-------|-------------|
| 4408 COPS5 | VEGFA | GPC1  | VEGFA_GPC1  |
| 4409 COPS5 | VEGFA | FLT1  | VEGFA_FLT1  |
| 4410 AR    | VEGFA | NRP2  | VEGFA_NRP2  |
| 4411 AR    | VEGFA | RET   | VEGFA_RET   |
| 4412 AR    | VEGFA | NRP1  | VEGFA_NRP1  |
| 4413 AR    | VEGFA | EGFR  | VEGFA_EGFR  |
| 4414 AR    | VEGFA | EPHB2 | VEGFA_EPHB2 |
| 4415 AR    | VEGFA | ITGB1 | VEGFA_ITGB1 |
| 4416 AR    | VEGFA | KDR   | VEGFA_KDR   |
| 4417 AR    | VEGFA | TYRO3 | VEGFA_TYRO3 |
| 4418 AR    | VEGFA | ITGA9 | VEGFA_ITGA9 |
| 4419 AR    | VEGFA | ITGAV | VEGFA_ITGAV |
| 4420 AR    | VEGFA | SIRPA | VEGFA_SIRPA |
| 4421 AR    | VEGFA | GPC1  | VEGFA_GPC1  |
| 4422 AR    | VEGFA | FLT1  | VEGFA_FLT1  |
| 4423 STAT3 | VEGFA | NRP2  | VEGFA_NRP2  |
| 4424 STAT3 | VEGFA | RET   | VEGFA_RET   |
| 4425 STAT3 | VEGFA | NRP1  | VEGFA_NRP1  |
| 4426 STAT3 | VEGFA | EGFR  | VEGFA_EGFR  |
| 4427 STAT3 | VEGFA | EPHB2 | VEGFA_EPHB2 |
| 4428 STAT3 | VEGFA | ITGB1 | VEGFA_ITGB1 |
| 4429 STAT3 | VEGFA | KDR   | VEGFA_KDR   |
| 4430 STAT3 | VEGFA | TYRO3 | VEGFA_TYRO3 |
| 4431 STAT3 | VEGFA | ITGA9 | VEGFA_ITGA9 |
| 4432 STAT3 | VEGFA | ITGAV | VEGFA_ITGAV |
| 4433 STAT3 | VEGFA | SIRPA | VEGFA_SIRPA |
| 4434 STAT3 | VEGFA | GPC1  | VEGFA_GPC1  |
| 4435 STAT3 | VEGFA | FLT1  | VEGFA_FLT1  |
| 4436 MEF2C | VEGFA | NRP2  | VEGFA_NRP2  |
| 4437 MEF2C | VEGFA | RET   | VEGFA_RET   |
| 4438 MEF2C | VEGFA | NRP1  | VEGFA_NRP1  |
| 4439 MEF2C | VEGFA | EGFR  | VEGFA_EGFR  |
| 4440 MEF2C | VEGFA | EPHB2 | VEGFA_EPHB2 |
| 4441 MEF2C | VEGFA | ITGB1 | VEGFA_ITGB1 |
| 4442 MEF2C | VEGFA | KDR   | VEGFA_KDR   |
| 4443 MEF2C | VEGFA | TYRO3 | VEGFA_TYRO3 |
| 4444 MEF2C | VEGFA | ITGA9 | VEGFA_ITGA9 |
| 4445 MEF2C | VEGFA | ITGAV | VEGFA_ITGAV |
| 4446 MEF2C | VEGFA | SIRPA | VEGFA_SIRPA |
| 4447 MEF2C | VEGFA | GPC1  | VEGFA_GPC1  |
| 4448 MEF2C | VEGFA | FLT1  | VEGFA_FLT1  |
| 4449 SP3   | VEGFA | NRP2  | VEGFA_NRP2  |
| 4450 SP3   | VEGFA | RET   | VEGFA_RET   |
| 4451 SP3   | VEGFA | NRP1  | VEGFA_NRP1  |
| 4452 SP3   | VEGFA | EGFR  | VEGFA_EGFR  |
| 4453 SP3   | VEGFA | EPHB2 | VEGFA_EPHB2 |
| 4454 SP3   | VEGFA | ITGB1 | VEGFA_ITGB1 |
| 4455 SP3   | VEGFA | KDR   | VEGFA_KDR   |
| 4456 SP3   | VEGFA | TYRO3 | VEGFA_TYRO3 |
| 4457 SP3   | VEGFA | ITGA9 | VEGFA_ITGA9 |
| 4458 SP3   | VEGFA | ITGAV | VEGFA_ITGAV |
| 4459 SP3   | VEGFA | SIRPA | VEGFA_SIRPA |
| 4460 SP3   | VEGFA | GPC1  | VEGFA_GPC1  |
| 4461 SP3   | VEGFA | FLT1  | VEGFA_FLT1  |
| 4462 ARNT  | VEGFA | NRP2  | VEGFA_NRP2  |
| 4463 ARNT  | VEGFA | RET   | VEGFA_RET   |
| 4464 ARNT  | VEGFA | NRP1  | VEGFA_NRP1  |
| 4465 ARNT  | VEGFA | EGFR  | VEGFA_EGFR  |

|              |       |       |             |
|--------------|-------|-------|-------------|
| 4466 ARNT    | VEGFA | EPHB2 | VEGFA_EPHB2 |
| 4467 ARNT    | VEGFA | ITGB1 | VEGFA_ITGB1 |
| 4468 ARNT    | VEGFA | KDR   | VEGFA_KDR   |
| 4469 ARNT    | VEGFA | TYRO3 | VEGFA_TYRO3 |
| 4470 ARNT    | VEGFA | ITGA9 | VEGFA_ITGA9 |
| 4471 ARNT    | VEGFA | ITGAV | VEGFA_ITGAV |
| 4472 ARNT    | VEGFA | SIRPA | VEGFA_SIRPA |
| 4473 ARNT    | VEGFA | GPC1  | VEGFA_GPC1  |
| 4474 ARNT    | VEGFA | FLT1  | VEGFA_FLT1  |
| 4475 DNMT1   | VEGFA | NRP2  | VEGFA_NRP2  |
| 4476 DNMT1   | VEGFA | RET   | VEGFA_RET   |
| 4477 DNMT1   | VEGFA | NRP1  | VEGFA_NRP1  |
| 4478 DNMT1   | VEGFA | EGFR  | VEGFA_EGFR  |
| 4479 DNMT1   | VEGFA | EPHB2 | VEGFA_EPHB2 |
| 4480 DNMT1   | VEGFA | ITGB1 | VEGFA_ITGB1 |
| 4481 DNMT1   | VEGFA | KDR   | VEGFA_KDR   |
| 4482 DNMT1   | VEGFA | TYRO3 | VEGFA_TYRO3 |
| 4483 DNMT1   | VEGFA | ITGA9 | VEGFA_ITGA9 |
| 4484 DNMT1   | VEGFA | ITGAV | VEGFA_ITGAV |
| 4485 DNMT1   | VEGFA | SIRPA | VEGFA_SIRPA |
| 4486 DNMT1   | VEGFA | GPC1  | VEGFA_GPC1  |
| 4487 DNMT1   | VEGFA | FLT1  | VEGFA_FLT1  |
| 4488 RUNX1   | VEGFA | NRP2  | VEGFA_NRP2  |
| 4489 RUNX1   | VEGFA | RET   | VEGFA_RET   |
| 4490 RUNX1   | VEGFA | NRP1  | VEGFA_NRP1  |
| 4491 RUNX1   | VEGFA | EGFR  | VEGFA_EGFR  |
| 4492 RUNX1   | VEGFA | EPHB2 | VEGFA_EPHB2 |
| 4493 RUNX1   | VEGFA | ITGB1 | VEGFA_ITGB1 |
| 4494 RUNX1   | VEGFA | KDR   | VEGFA_KDR   |
| 4495 RUNX1   | VEGFA | TYRO3 | VEGFA_TYRO3 |
| 4496 RUNX1   | VEGFA | ITGA9 | VEGFA_ITGA9 |
| 4497 RUNX1   | VEGFA | ITGAV | VEGFA_ITGAV |
| 4498 RUNX1   | VEGFA | SIRPA | VEGFA_SIRPA |
| 4499 RUNX1   | VEGFA | GPC1  | VEGFA_GPC1  |
| 4500 RUNX1   | VEGFA | FLT1  | VEGFA_FLT1  |
| 4501 ZFP36L1 | VEGFA | NRP2  | VEGFA_NRP2  |
| 4502 ZFP36L1 | VEGFA | RET   | VEGFA_RET   |
| 4503 ZFP36L1 | VEGFA | NRP1  | VEGFA_NRP1  |
| 4504 ZFP36L1 | VEGFA | EGFR  | VEGFA_EGFR  |
| 4505 ZFP36L1 | VEGFA | EPHB2 | VEGFA_EPHB2 |
| 4506 ZFP36L1 | VEGFA | ITGB1 | VEGFA_ITGB1 |
| 4507 ZFP36L1 | VEGFA | KDR   | VEGFA_KDR   |
| 4508 ZFP36L1 | VEGFA | TYRO3 | VEGFA_TYRO3 |
| 4509 ZFP36L1 | VEGFA | ITGA9 | VEGFA_ITGA9 |
| 4510 ZFP36L1 | VEGFA | ITGAV | VEGFA_ITGAV |
| 4511 ZFP36L1 | VEGFA | SIRPA | VEGFA_SIRPA |
| 4512 ZFP36L1 | VEGFA | GPC1  | VEGFA_GPC1  |
| 4513 ZFP36L1 | VEGFA | FLT1  | VEGFA_FLT1  |
| 4514 HDAC2   | VEGFA | NRP2  | VEGFA_NRP2  |
| 4515 HDAC2   | VEGFA | RET   | VEGFA_RET   |
| 4516 HDAC2   | VEGFA | NRP1  | VEGFA_NRP1  |
| 4517 HDAC2   | VEGFA | EGFR  | VEGFA_EGFR  |
| 4518 HDAC2   | VEGFA | EPHB2 | VEGFA_EPHB2 |
| 4519 HDAC2   | VEGFA | ITGB1 | VEGFA_ITGB1 |
| 4520 HDAC2   | VEGFA | KDR   | VEGFA_KDR   |
| 4521 HDAC2   | VEGFA | TYRO3 | VEGFA_TYRO3 |
| 4522 HDAC2   | VEGFA | ITGA9 | VEGFA_ITGA9 |
| 4523 HDAC2   | VEGFA | ITGAV | VEGFA_ITGAV |

|            |       |       |             |
|------------|-------|-------|-------------|
| 4524 HDAC2 | VEGFA | SIRPA | VEGFA_SIRPA |
| 4525 HDAC2 | VEGFA | GPC1  | VEGFA_GPC1  |
| 4526 HDAC2 | VEGFA | FLT1  | VEGFA_FLT1  |
| 4527 TRAF6 | VEGFA | NRP2  | VEGFA_NRP2  |
| 4528 TRAF6 | VEGFA | RET   | VEGFA_RET   |
| 4529 TRAF6 | VEGFA | NRP1  | VEGFA_NRP1  |
| 4530 TRAF6 | VEGFA | EGFR  | VEGFA_EGFR  |
| 4531 TRAF6 | VEGFA | EPHB2 | VEGFA_EPHB2 |
| 4532 TRAF6 | VEGFA | ITGB1 | VEGFA_ITGB1 |
| 4533 TRAF6 | VEGFA | KDR   | VEGFA_KDR   |
| 4534 TRAF6 | VEGFA | TYRO3 | VEGFA_TYRO3 |
| 4535 TRAF6 | VEGFA | ITGA9 | VEGFA_ITGA9 |
| 4536 TRAF6 | VEGFA | ITGAV | VEGFA_ITGAV |
| 4537 TRAF6 | VEGFA | SIRPA | VEGFA_SIRPA |
| 4538 TRAF6 | VEGFA | GPC1  | VEGFA_GPC1  |
| 4539 TRAF6 | VEGFA | FLT1  | VEGFA_FLT1  |
| 4540 TCF4  | VEGFA | NRP2  | VEGFA_NRP2  |
| 4541 TCF4  | VEGFA | RET   | VEGFA_RET   |
| 4542 TCF4  | VEGFA | NRP1  | VEGFA_NRP1  |
| 4543 TCF4  | VEGFA | EGFR  | VEGFA_EGFR  |
| 4544 TCF4  | VEGFA | EPHB2 | VEGFA_EPHB2 |
| 4545 TCF4  | VEGFA | ITGB1 | VEGFA_ITGB1 |
| 4546 TCF4  | VEGFA | KDR   | VEGFA_KDR   |
| 4547 TCF4  | VEGFA | TYRO3 | VEGFA_TYRO3 |
| 4548 TCF4  | VEGFA | ITGA9 | VEGFA_ITGA9 |
| 4549 TCF4  | VEGFA | ITGAV | VEGFA_ITGAV |
| 4550 TCF4  | VEGFA | SIRPA | VEGFA_SIRPA |
| 4551 TCF4  | VEGFA | GPC1  | VEGFA_GPC1  |
| 4552 TCF4  | VEGFA | FLT1  | VEGFA_FLT1  |
| 4553 JUN   | VEGFA | NRP2  | VEGFA_NRP2  |
| 4554 JUN   | VEGFA | RET   | VEGFA_RET   |
| 4555 JUN   | VEGFA | NRP1  | VEGFA_NRP1  |
| 4556 JUN   | VEGFA | EGFR  | VEGFA_EGFR  |
| 4557 JUN   | VEGFA | EPHB2 | VEGFA_EPHB2 |
| 4558 JUN   | VEGFA | ITGB1 | VEGFA_ITGB1 |
| 4559 JUN   | VEGFA | KDR   | VEGFA_KDR   |
| 4560 JUN   | VEGFA | TYRO3 | VEGFA_TYRO3 |
| 4561 JUN   | VEGFA | ITGA9 | VEGFA_ITGA9 |
| 4562 JUN   | VEGFA | ITGAV | VEGFA_ITGAV |
| 4563 JUN   | VEGFA | SIRPA | VEGFA_SIRPA |
| 4564 JUN   | VEGFA | GPC1  | VEGFA_GPC1  |
| 4565 JUN   | VEGFA | FLT1  | VEGFA_FLT1  |
| 4566 KLF4  | VEGFA | NRP2  | VEGFA_NRP2  |
| 4567 KLF4  | VEGFA | RET   | VEGFA_RET   |
| 4568 KLF4  | VEGFA | NRP1  | VEGFA_NRP1  |
| 4569 KLF4  | VEGFA | EGFR  | VEGFA_EGFR  |
| 4570 KLF4  | VEGFA | EPHB2 | VEGFA_EPHB2 |
| 4571 KLF4  | VEGFA | ITGB1 | VEGFA_ITGB1 |
| 4572 KLF4  | VEGFA | KDR   | VEGFA_KDR   |
| 4573 KLF4  | VEGFA | TYRO3 | VEGFA_TYRO3 |
| 4574 KLF4  | VEGFA | ITGA9 | VEGFA_ITGA9 |
| 4575 KLF4  | VEGFA | ITGAV | VEGFA_ITGAV |
| 4576 KLF4  | VEGFA | SIRPA | VEGFA_SIRPA |
| 4577 KLF4  | VEGFA | GPC1  | VEGFA_GPC1  |
| 4578 KLF4  | VEGFA | FLT1  | VEGFA_FLT1  |
| 4579 TP53  | VEGFA | NRP2  | VEGFA_NRP2  |
| 4580 TP53  | VEGFA | RET   | VEGFA_RET   |
| 4581 TP53  | VEGFA | NRP1  | VEGFA_NRP1  |

|              |       |       |             |
|--------------|-------|-------|-------------|
| 4582 TP53    | VEGFA | EGFR  | VEGFA_EGFR  |
| 4583 TP53    | VEGFA | EPHB2 | VEGFA_EPHB2 |
| 4584 TP53    | VEGFA | ITGB1 | VEGFA_ITGB1 |
| 4585 TP53    | VEGFA | KDR   | VEGFA_KDR   |
| 4586 TP53    | VEGFA | TYRO3 | VEGFA_TYRO3 |
| 4587 TP53    | VEGFA | ITGA9 | VEGFA_ITGA9 |
| 4588 TP53    | VEGFA | ITGAV | VEGFA_ITGAV |
| 4589 TP53    | VEGFA | SIRPA | VEGFA_SIRPA |
| 4590 TP53    | VEGFA | GPC1  | VEGFA_GPC1  |
| 4591 TP53    | VEGFA | FLT1  | VEGFA_FLT1  |
| 4592 ID3     | VEGFA | NRP2  | VEGFA_NRP2  |
| 4593 ID3     | VEGFA | RET   | VEGFA_RET   |
| 4594 ID3     | VEGFA | NRP1  | VEGFA_NRP1  |
| 4595 ID3     | VEGFA | EGFR  | VEGFA_EGFR  |
| 4596 ID3     | VEGFA | EPHB2 | VEGFA_EPHB2 |
| 4597 ID3     | VEGFA | ITGB1 | VEGFA_ITGB1 |
| 4598 ID3     | VEGFA | KDR   | VEGFA_KDR   |
| 4599 ID3     | VEGFA | TYRO3 | VEGFA_TYRO3 |
| 4600 ID3     | VEGFA | ITGA9 | VEGFA_ITGA9 |
| 4601 ID3     | VEGFA | ITGAV | VEGFA_ITGAV |
| 4602 ID3     | VEGFA | SIRPA | VEGFA_SIRPA |
| 4603 ID3     | VEGFA | GPC1  | VEGFA_GPC1  |
| 4604 ID3     | VEGFA | FLT1  | VEGFA_FLT1  |
| 4605 HIC1    | VEGFA | NRP2  | VEGFA_NRP2  |
| 4606 HIC1    | VEGFA | RET   | VEGFA_RET   |
| 4607 HIC1    | VEGFA | NRP1  | VEGFA_NRP1  |
| 4608 HIC1    | VEGFA | EGFR  | VEGFA_EGFR  |
| 4609 HIC1    | VEGFA | EPHB2 | VEGFA_EPHB2 |
| 4610 HIC1    | VEGFA | ITGB1 | VEGFA_ITGB1 |
| 4611 HIC1    | VEGFA | KDR   | VEGFA_KDR   |
| 4612 HIC1    | VEGFA | TYRO3 | VEGFA_TYRO3 |
| 4613 HIC1    | VEGFA | ITGA9 | VEGFA_ITGA9 |
| 4614 HIC1    | VEGFA | ITGAV | VEGFA_ITGAV |
| 4615 HIC1    | VEGFA | SIRPA | VEGFA_SIRPA |
| 4616 HIC1    | VEGFA | GPC1  | VEGFA_GPC1  |
| 4617 HIC1    | VEGFA | FLT1  | VEGFA_FLT1  |
| 4618 HTATIP2 | VEGFA | NRP2  | VEGFA_NRP2  |
| 4619 HTATIP2 | VEGFA | RET   | VEGFA_RET   |
| 4620 HTATIP2 | VEGFA | NRP1  | VEGFA_NRP1  |
| 4621 HTATIP2 | VEGFA | EGFR  | VEGFA_EGFR  |
| 4622 HTATIP2 | VEGFA | EPHB2 | VEGFA_EPHB2 |
| 4623 HTATIP2 | VEGFA | ITGB1 | VEGFA_ITGB1 |
| 4624 HTATIP2 | VEGFA | KDR   | VEGFA_KDR   |
| 4625 HTATIP2 | VEGFA | TYRO3 | VEGFA_TYRO3 |
| 4626 HTATIP2 | VEGFA | ITGA9 | VEGFA_ITGA9 |
| 4627 HTATIP2 | VEGFA | ITGAV | VEGFA_ITGAV |
| 4628 HTATIP2 | VEGFA | SIRPA | VEGFA_SIRPA |
| 4629 HTATIP2 | VEGFA | GPC1  | VEGFA_GPC1  |
| 4630 HTATIP2 | VEGFA | FLT1  | VEGFA_FLT1  |
| 4631 EP300   | VEGFA | NRP2  | VEGFA_NRP2  |
| 4632 EP300   | VEGFA | RET   | VEGFA_RET   |
| 4633 EP300   | VEGFA | NRP1  | VEGFA_NRP1  |
| 4634 EP300   | VEGFA | EGFR  | VEGFA_EGFR  |
| 4635 EP300   | VEGFA | EPHB2 | VEGFA_EPHB2 |
| 4636 EP300   | VEGFA | ITGB1 | VEGFA_ITGB1 |
| 4637 EP300   | VEGFA | KDR   | VEGFA_KDR   |
| 4638 EP300   | VEGFA | TYRO3 | VEGFA_TYRO3 |
| 4639 EP300   | VEGFA | ITGA9 | VEGFA_ITGA9 |



|      |        |       |           |               |
|------|--------|-------|-----------|---------------|
| 4640 | EP300  | VEGFA | ITGAV     | VEGFA_ITGAV   |
| 4641 | EP300  | VEGFA | SIRPA     | VEGFA_SIRPA   |
| 4642 | EP300  | VEGFA | GPC1      | VEGFA_GPC1    |
| 4643 | EP300  | VEGFA | FLT1      | VEGFA_FLT1    |
| 4644 | RUNX2  | VEGFC | ITGB1     | VEGFC_ITGB1   |
| 4645 | SIX1   | VEGFC | ITGB1     | VEGFC_ITGB1   |
| 4646 | ZNF148 | VIM   | CD44      | VIM_CD44      |
| 4647 | SP1    | VIM   | CD44      | VIM_CD44      |
| 4648 | ERG    | VIM   | CD44      | VIM_CD44      |
| 4649 | PARP1  | VIM   | CD44      | VIM_CD44      |
| 4650 | CTNNB1 | VIM   | CD44      | VIM_CD44      |
| 4651 | HOXA7  | VIM   | CD44      | VIM_CD44      |
| 4652 | TRIM16 | VIM   | CD44      | VIM_CD44      |
| 4653 | ETV4   | VIM   | CD44      | VIM_CD44      |
| 4654 | SOX2   | VIM   | CD44      | VIM_CD44      |
| 4655 | HIF1A  | VIM   | CD44      | VIM_CD44      |
| 4656 | KLF8   | VIM   | CD44      | VIM_CD44      |
| 4657 | AR     | VIM   | CD44      | VIM_CD44      |
| 4658 | HDGF   | VIM   | CD44      | VIM_CD44      |
| 4659 | ZEB2   | VIM   | CD44      | VIM_CD44      |
| 4660 | HIPK2  | VIM   | CD44      | VIM_CD44      |
| 4661 | TCF4   | VIM   | CD44      | VIM_CD44      |
| 4662 | ETS2   | VWF   | TNFRSF11B | VWF_TNFRSF11B |
| 4663 | ERG    | VWF   | TNFRSF11B | VWF_TNFRSF11B |
| 4664 | NFIC   | VWF   | TNFRSF11B | VWF_TNFRSF11B |
| 4665 | POU2F1 | VWF   | TNFRSF11B | VWF_TNFRSF11B |
| 4666 | GATA6  | VWF   | TNFRSF11B | VWF_TNFRSF11B |
| 4667 | NFIL3  | VWF   | TNFRSF11B | VWF_TNFRSF11B |
| 4668 | NFKB1  | VWF   | TNFRSF11B | VWF_TNFRSF11B |
| 4669 | RELA   | VWF   | TNFRSF11B | VWF_TNFRSF11B |
| 4670 | ETS1   | VWF   | TNFRSF11B | VWF_TNFRSF11B |
| 4671 | YY1    | VWF   | TNFRSF11B | VWF_TNFRSF11B |
| 4672 | FOXQ1  | WNT3A | ATP6AP2   | WNT3A_ATP6AP2 |
| 4673 | FOXQ1  | WNT3A | LRP1      | WNT3A_LRP1    |
| 4674 | SP3    | CALM2 | ABCA1     | CALM2_ABCA1   |
| 4675 | SP3    | CALM1 | ABCA1     | CALM1_ABCA1   |
| 4676 | SP3    | PLTP  | ABCA1     | PLTP_ABCA1    |
| 4677 | SP3    | CALM3 | ABCA1     | CALM3_ABCA1   |
| 4678 | NR1H3  | CALM2 | ABCA1     | CALM2_ABCA1   |
| 4679 | NR1H3  | CALM1 | ABCA1     | CALM1_ABCA1   |
| 4680 | NR1H3  | PLTP  | ABCA1     | PLTP_ABCA1    |
| 4681 | NR1H3  | CALM3 | ABCA1     | CALM3_ABCA1   |
| 4682 | SREBF2 | CALM2 | ABCA1     | CALM2_ABCA1   |
| 4683 | SREBF2 | CALM1 | ABCA1     | CALM1_ABCA1   |
| 4684 | SREBF2 | PLTP  | ABCA1     | PLTP_ABCA1    |
| 4685 | SREBF2 | CALM3 | ABCA1     | CALM3_ABCA1   |
| 4686 | NFKB1  | CALM2 | ABCA1     | CALM2_ABCA1   |
| 4687 | NFKB1  | CALM1 | ABCA1     | CALM1_ABCA1   |
| 4688 | NFKB1  | PLTP  | ABCA1     | PLTP_ABCA1    |
| 4689 | NFKB1  | CALM3 | ABCA1     | CALM3_ABCA1   |
| 4690 | FOXA1  | CALM2 | ABCA1     | CALM2_ABCA1   |
| 4691 | FOXA1  | CALM1 | ABCA1     | CALM1_ABCA1   |
| 4692 | FOXA1  | PLTP  | ABCA1     | PLTP_ABCA1    |
| 4693 | FOXA1  | CALM3 | ABCA1     | CALM3_ABCA1   |
| 4694 | ZNF202 | CALM2 | ABCA1     | CALM2_ABCA1   |
| 4695 | ZNF202 | CALM1 | ABCA1     | CALM1_ABCA1   |
| 4696 | ZNF202 | PLTP  | ABCA1     | PLTP_ABCA1    |
| 4697 | ZNF202 | CALM3 | ABCA1     | CALM3_ABCA1   |

|      |        |         |        |               |
|------|--------|---------|--------|---------------|
| 4698 | STAT3  | CALM2   | ABCA1  | CALM2_ABCA1   |
| 4699 | STAT3  | CALM1   | ABCA1  | CALM1_ABCA1   |
| 4700 | STAT3  | PLTP    | ABCA1  | PLTP_ABCA1    |
| 4701 | STAT3  | CALM3   | ABCA1  | CALM3_ABCA1   |
| 4702 | NR1H2  | CALM2   | ABCA1  | CALM2_ABCA1   |
| 4703 | NR1H2  | CALM1   | ABCA1  | CALM1_ABCA1   |
| 4704 | NR1H2  | PLTP    | ABCA1  | PLTP_ABCA1    |
| 4705 | NR1H2  | CALM3   | ABCA1  | CALM3_ABCA1   |
| 4706 | USF1   | CALM2   | ABCA1  | CALM2_ABCA1   |
| 4707 | USF1   | CALM1   | ABCA1  | CALM1_ABCA1   |
| 4708 | USF1   | PLTP    | ABCA1  | PLTP_ABCA1    |
| 4709 | USF1   | CALM3   | ABCA1  | CALM3_ABCA1   |
| 4710 | FOXA2  | CALM2   | ABCA1  | CALM2_ABCA1   |
| 4711 | FOXA2  | CALM1   | ABCA1  | CALM1_ABCA1   |
| 4712 | FOXA2  | PLTP    | ABCA1  | PLTP_ABCA1    |
| 4713 | FOXA2  | CALM3   | ABCA1  | CALM3_ABCA1   |
| 4714 | RELA   | CALM2   | ABCA1  | CALM2_ABCA1   |
| 4715 | RELA   | CALM1   | ABCA1  | CALM1_ABCA1   |
| 4716 | RELA   | PLTP    | ABCA1  | PLTP_ABCA1    |
| 4717 | RELA   | CALM3   | ABCA1  | CALM3_ABCA1   |
| 4718 | SP1    | CALM2   | ABCA1  | CALM2_ABCA1   |
| 4719 | SP1    | CALM1   | ABCA1  | CALM1_ABCA1   |
| 4720 | SP1    | PLTP    | ABCA1  | PLTP_ABCA1    |
| 4721 | SP1    | CALM3   | ABCA1  | CALM3_ABCA1   |
| 4722 | USF2   | CALM2   | ABCA1  | CALM2_ABCA1   |
| 4723 | USF2   | CALM1   | ABCA1  | CALM1_ABCA1   |
| 4724 | USF2   | PLTP    | ABCA1  | PLTP_ABCA1    |
| 4725 | USF2   | CALM3   | ABCA1  | CALM3_ABCA1   |
| 4726 | RXRA   | CALM2   | ABCA1  | CALM2_ABCA1   |
| 4727 | RXRA   | CALM1   | ABCA1  | CALM1_ABCA1   |
| 4728 | RXRA   | PLTP    | ABCA1  | PLTP_ABCA1    |
| 4729 | RXRA   | CALM3   | ABCA1  | CALM3_ABCA1   |
| 4730 | NFKB1  | GNAS    | ADORA1 | GNAS_ADORA1   |
| 4731 | NFKB1  | GNAI2   | ADORA1 | GNAI2_ADORA1  |
| 4732 | RELA   | GNAS    | ADORA1 | GNAS_ADORA1   |
| 4733 | RELA   | GNAI2   | ADORA1 | GNAI2_ADORA1  |
| 4734 | STAT6  | GNAI2   | ADRA2B | GNAI2_ADRA2B  |
| 4735 | TFAP2A | GNAI2   | ADRA2B | GNAI2_ADRA2B  |
| 4736 | SP1    | GNAI2   | ADRA2B | GNAI2_ADRA2B  |
| 4737 | EZH2   | IL1B    | ADRB2  | IL1B_ADRB2    |
| 4738 | SP1    | GNAS    | ADRB3  | GNAS_ADRB3    |
| 4739 | ETV4   | UBA52   | AGTR1  | UBA52_AGTR1   |
| 4740 | SND1   | UBA52   | AGTR1  | UBA52_AGTR1   |
| 4741 | SP1    | UBA52   | AGTR1  | UBA52_AGTR1   |
| 4742 | HIF1A  | UBA52   | AGTR1  | UBA52_AGTR1   |
| 4743 | SP3    | UBA52   | AGTR1  | UBA52_AGTR1   |
| 4744 | HDAC3  | ALOX5AP | ALOX5  | ALOX5AP_ALOX5 |
| 4745 | HDAC3  | PTGS2   | ALOX5  | PTGS2_ALOX5   |
| 4746 | EGR1   | ALOX5AP | ALOX5  | ALOX5AP_ALOX5 |
| 4747 | SP1    | ALOX5AP | ALOX5  | ALOX5AP_ALOX5 |
| 4748 | MBD1   | ALOX5AP | ALOX5  | ALOX5AP_ALOX5 |
| 4749 | MBD1   | PTGS2   | ALOX5  | PTGS2_ALOX5   |
| 4750 | TP53   | ALOX5AP | ALOX5  | ALOX5AP_ALOX5 |
| 4751 | TP53   | PTGS2   | ALOX5  | PTGS2_ALOX5   |
| 4752 | MBD2   | ALOX5AP | ALOX5  | ALOX5AP_ALOX5 |
| 4753 | MBD2   | PTGS2   | ALOX5  | PTGS2_ALOX5   |
| 4754 | HDAC2  | ALOX5AP | ALOX5  | ALOX5AP_ALOX5 |
| 4755 | HDAC2  | PTGS2   | ALOX5  | PTGS2_ALOX5   |

|      |        |         |       |               |
|------|--------|---------|-------|---------------|
| 4756 | MECP2  | ALOX5AP | ALOX5 | ALOX5AP_ALOX5 |
| 4757 | MECP2  | PTGS2   | ALOX5 | PTGS2_ALOX5   |
| 4758 | EZH2   | ADAM10  | AXL   | ADAM10_AXL    |
| 4759 | EZH2   | GAS6    | AXL   | GAS6_AXL      |
| 4760 | EZH2   | PROS1   | AXL   | PROS1_AXL     |
| 4761 | PPARG  | CYR61   | CAV1  | CYR61_CAV1    |
| 4762 | PPARG  | GNAI2   | CAV1  | GNAI2_CAV1    |
| 4763 | PPARG  | BST1    | CAV1  | BST1_CAV1     |
| 4764 | PPARG  | APP     | CAV1  | APP_CAV1      |
| 4765 | PPARG  | EGF     | CAV1  | EGF_CAV1      |
| 4766 | PPARG  | TGFB1   | CAV1  | TGFB1_CAV1    |
| 4767 | PPARG  | HRAS    | CAV1  | HRAS_CAV1     |
| 4768 | TFDP1  | CYR61   | CAV1  | CYR61_CAV1    |
| 4769 | TFDP1  | GNAI2   | CAV1  | GNAI2_CAV1    |
| 4770 | TFDP1  | BST1    | CAV1  | BST1_CAV1     |
| 4771 | TFDP1  | PTGS2   | CAV1  | PTGS2_CAV1    |
| 4772 | TFDP1  | APP     | CAV1  | APP_CAV1      |
| 4773 | TFDP1  | ICAM1   | CAV1  | ICAM1_CAV1    |
| 4774 | TFDP1  | EGF     | CAV1  | EGF_CAV1      |
| 4775 | TFDP1  | TGFB1   | CAV1  | TGFB1_CAV1    |
| 4776 | TFDP1  | HRAS    | CAV1  | HRAS_CAV1     |
| 4777 | SP1    | CYR61   | CAV1  | CYR61_CAV1    |
| 4778 | SP1    | GNAI2   | CAV1  | GNAI2_CAV1    |
| 4779 | SP1    | BST1    | CAV1  | BST1_CAV1     |
| 4780 | GATA6  | CYR61   | CAV1  | CYR61_CAV1    |
| 4781 | GATA6  | GNAI2   | CAV1  | GNAI2_CAV1    |
| 4782 | GATA6  | BST1    | CAV1  | BST1_CAV1     |
| 4783 | GATA6  | PTGS2   | CAV1  | PTGS2_CAV1    |
| 4784 | GATA6  | APP     | CAV1  | APP_CAV1      |
| 4785 | GATA6  | ICAM1   | CAV1  | ICAM1_CAV1    |
| 4786 | GATA6  | EGF     | CAV1  | EGF_CAV1      |
| 4787 | GATA6  | TGFB1   | CAV1  | TGFB1_CAV1    |
| 4788 | GATA6  | HRAS    | CAV1  | HRAS_CAV1     |
| 4789 | SREBF1 | CYR61   | CAV1  | CYR61_CAV1    |
| 4790 | SREBF1 | GNAI2   | CAV1  | GNAI2_CAV1    |
| 4791 | SREBF1 | BST1    | CAV1  | BST1_CAV1     |
| 4792 | SREBF1 | PTGS2   | CAV1  | PTGS2_CAV1    |
| 4793 | SREBF1 | APP     | CAV1  | APP_CAV1      |
| 4794 | SREBF1 | ICAM1   | CAV1  | ICAM1_CAV1    |
| 4795 | SREBF1 | EGF     | CAV1  | EGF_CAV1      |
| 4796 | SREBF1 | TGFB1   | CAV1  | TGFB1_CAV1    |
| 4797 | SREBF1 | HRAS    | CAV1  | HRAS_CAV1     |
| 4798 | TP53   | CYR61   | CAV1  | CYR61_CAV1    |
| 4799 | TP53   | GNAI2   | CAV1  | GNAI2_CAV1    |
| 4800 | TP53   | BST1    | CAV1  | BST1_CAV1     |
| 4801 | TP53   | PTGS2   | CAV1  | PTGS2_CAV1    |
| 4802 | TP53   | APP     | CAV1  | APP_CAV1      |
| 4803 | TP53   | ICAM1   | CAV1  | ICAM1_CAV1    |
| 4804 | TP53   | EGF     | CAV1  | EGF_CAV1      |
| 4805 | TP53   | TGFB1   | CAV1  | TGFB1_CAV1    |
| 4806 | STAT1  | CCL5    | CCR1  | CCL5_CCR1     |
| 4807 | STAT1  | CCL4    | CCR1  | CCL4_CCR1     |
| 4808 | NFKB1  | CCL28   | CCR3  | CCL28_CCR3    |
| 4809 | RELA   | CCL28   | CCR3  | CCL28_CCR3    |
| 4810 | GATA1  | CCL28   | CCR3  | CCL28_CCR3    |
| 4811 | GATA1  | CCL3    | CCR3  | CCL3_CCR3     |
| 4812 | GATA1  | CCL5    | CCR3  | CCL5_CCR3     |
| 4813 | GATA1  | CCL4    | CCR3  | CCL4_CCR3     |

|             |          |       |               |
|-------------|----------|-------|---------------|
| 4814 FOSL2  | CCL5     | CCR4  | CCL5_CCR4     |
| 4815 FOSL2  | CCL3     | CCR4  | CCL3_CCR4     |
| 4816 JUND   | CCL3     | CCR4  | CCL3_CCR4     |
| 4817 FOXP3  | CCL5     | CCR4  | CCL5_CCR4     |
| 4818 FOXP3  | CCL3     | CCR4  | CCL3_CCR4     |
| 4819 TBX21  | CCL5     | CCR4  | CCL5_CCR4     |
| 4820 TBX21  | CCL3     | CCR4  | CCL3_CCR4     |
| 4821 YY1    | CCL3     | CCR5  | CCL3_CCR5     |
| 4822 YY1    | CCL3L3   | CCR5  | CCL3L3_CCR5   |
| 4823 YY1    | GNAI2    | CCR5  | GNAI2_CCR5    |
| 4824 YY1    | IL16     | CCR5  | IL16_CCR5     |
| 4825 YY1    | CCL4     | CCR5  | CCL4_CCR5     |
| 4826 YY1    | CCL5     | CCR5  | CCL5_CCR5     |
| 4827 KLF2   | CCL3     | CCR5  | CCL3_CCR5     |
| 4828 KLF2   | CCL3L3   | CCR5  | CCL3L3_CCR5   |
| 4829 KLF2   | GNAI2    | CCR5  | GNAI2_CCR5    |
| 4830 KLF2   | IL16     | CCR5  | IL16_CCR5     |
| 4831 KLF2   | CCL4     | CCR5  | CCL4_CCR5     |
| 4832 KLF2   | CCL5     | CCR5  | CCL5_CCR5     |
| 4833 NFKB1  | CCL3L3   | CCR5  | CCL3L3_CCR5   |
| 4834 NFKB1  | GNAI2    | CCR5  | GNAI2_CCR5    |
| 4835 NFKB1  | IL16     | CCR5  | IL16_CCR5     |
| 4836 RELA   | CCL3L3   | CCR5  | CCL3L3_CCR5   |
| 4837 RELA   | GNAI2    | CCR5  | GNAI2_CCR5    |
| 4838 RELA   | IL16     | CCR5  | IL16_CCR5     |
| 4839 NR3C2  | CCL3     | CCR5  | CCL3_CCR5     |
| 4840 NR3C2  | CCL3L3   | CCR5  | CCL3L3_CCR5   |
| 4841 NR3C2  | GNAI2    | CCR5  | GNAI2_CCR5    |
| 4842 NR3C2  | IL16     | CCR5  | IL16_CCR5     |
| 4843 NR3C2  | CCL4     | CCR5  | CCL4_CCR5     |
| 4844 NR3C2  | CCL5     | CCR5  | CCL5_CCR5     |
| 4845 NR3C2  | DEFB1    | CCR6  | DEFB1_CCR6    |
| 4846 NR3C2  | DEFB103B | CCR6  | DEFB103B_CCR6 |
| 4847 NR3C2  | DEFB103A | CCR6  | DEFB103A_CCR6 |
| 4848 NR3C2  | DEFB4B   | CCR6  | DEFB4B_CCR6   |
| 4849 NR3C2  | DEFB4A   | CCR6  | DEFB4A_CCR6   |
| 4850 NR3C2  | CCL20    | CCR6  | CCL20_CCR6    |
| 4851 RELA   | CCL21    | CCR7  | CCL21_CCR7    |
| 4852 NFKB1  | CCL21    | CCR7  | CCL21_CCR7    |
| 4853 KLF2   | CCL19    | CCR7  | CCL19_CCR7    |
| 4854 KLF2   | CCL21    | CCR7  | CCL21_CCR7    |
| 4855 TRERF1 | CCL19    | CCR7  | CCL19_CCR7    |
| 4856 TRERF1 | CCL21    | CCR7  | CCL21_CCR7    |
| 4857 HIF1A  | CCL19    | CCR7  | CCL19_CCR7    |
| 4858 HIF1A  | CCL21    | CCR7  | CCL21_CCR7    |
| 4859 EPAS1  | CCL19    | CCR7  | CCL19_CCR7    |
| 4860 EPAS1  | CCL21    | CCR7  | CCL21_CCR7    |
| 4861 SP1    | LAMC2    | CD151 | LAMC2_CD151   |
| 4862 SP1    | DUSP18   | CD151 | DUSP18_CD151  |
| 4863 SP1    | MMP7     | CD151 | MMP7_CD151    |
| 4864 SP1    | LAMB3    | CD151 | LAMB3_CD151   |
| 4865 PAX5   | C3       | CD19  | C3_CD19       |
| 4866 APEX1  | C3       | CD19  | C3_CD19       |
| 4867 CREM   | B2M      | CD247 | B2M_CD247     |
| 4868 CREM   | BTLA     | CD247 | BTLA_CD247    |
| 4869 SP1    | IL12A    | CD28  | IL12A_CD28    |
| 4870 EGR1   | IL12A    | CD28  | IL12A_CD28    |
| 4871 PPARG  | COL1A1   | CD36  | COL1A1_CD36   |

|      |         |        |      |             |
|------|---------|--------|------|-------------|
| 4872 | PPARG   | THBS1  | CD36 | THBS1_CD36  |
| 4873 | PPARG   | COL1A2 | CD36 | COL1A2_CD36 |
| 4874 | PPARA   | COL1A1 | CD36 | COL1A1_CD36 |
| 4875 | PPARA   | THBS1  | CD36 | THBS1_CD36  |
| 4876 | PPARA   | COL1A2 | CD36 | COL1A2_CD36 |
| 4877 | RUNX3   | COL1A1 | CD36 | COL1A1_CD36 |
| 4878 | RUNX3   | THBS1  | CD36 | THBS1_CD36  |
| 4879 | RUNX3   | COL1A2 | CD36 | COL1A2_CD36 |
| 4880 | NFATC2  | HLA-B  | CD3G | HLA-B_CD3G  |
| 4881 | NFATC2  | HLA-A  | CD3G | HLA-A_CD3G  |
| 4882 | NFATC2  | HLA-C  | CD3G | HLA-C_CD3G  |
| 4883 | NFATC2  | B2M    | CD3G | B2M_CD3G    |
| 4884 | NFATC1  | HLA-B  | CD3G | HLA-B_CD3G  |
| 4885 | NFATC1  | HLA-A  | CD3G | HLA-A_CD3G  |
| 4886 | NFATC1  | HLA-C  | CD3G | HLA-C_CD3G  |
| 4887 | NFATC1  | B2M    | CD3G | B2M_CD3G    |
| 4888 | NFKB1   | HLA-B  | CD3G | HLA-B_CD3G  |
| 4889 | NFKB1   | HLA-A  | CD3G | HLA-A_CD3G  |
| 4890 | NFKB1   | HLA-C  | CD3G | HLA-C_CD3G  |
| 4891 | MAZ     | CXCL12 | CD4  | CXCL12_CD4  |
| 4892 | MAZ     | IL16   | CD4  | IL16_CD4    |
| 4893 | MAZ     | PIP    | CD4  | PIP_CD4     |
| 4894 | MAZ     | HLA-G  | CD4  | HLA-G_CD4   |
| 4895 | MAZ     | SLPI   | CD4  | SLPI_CD4    |
| 4896 | TCF3    | CXCL12 | CD4  | CXCL12_CD4  |
| 4897 | TCF3    | IL16   | CD4  | IL16_CD4    |
| 4898 | TCF3    | PIP    | CD4  | PIP_CD4     |
| 4899 | TCF3    | HLA-G  | CD4  | HLA-G_CD4   |
| 4900 | TCF3    | SLPI   | CD4  | SLPI_CD4    |
| 4901 | EIF2AK2 | CXCL12 | CD4  | CXCL12_CD4  |
| 4902 | EIF2AK2 | IL16   | CD4  | IL16_CD4    |
| 4903 | EIF2AK2 | PIP    | CD4  | PIP_CD4     |
| 4904 | EIF2AK2 | HLA-G  | CD4  | HLA-G_CD4   |
| 4905 | EIF2AK2 | SLPI   | CD4  | SLPI_CD4    |
| 4906 | MYB     | CXCL12 | CD4  | CXCL12_CD4  |
| 4907 | MYB     | IL16   | CD4  | IL16_CD4    |
| 4908 | MYB     | PIP    | CD4  | PIP_CD4     |
| 4909 | MYB     | HLA-G  | CD4  | HLA-G_CD4   |
| 4910 | MYB     | SLPI   | CD4  | SLPI_CD4    |
| 4911 | CREB1   | CXCL12 | CD4  | CXCL12_CD4  |
| 4912 | CREB1   | IL16   | CD4  | IL16_CD4    |
| 4913 | CREB1   | PIP    | CD4  | PIP_CD4     |
| 4914 | CREB1   | HLA-G  | CD4  | HLA-G_CD4   |
| 4915 | CREB1   | SLPI   | CD4  | SLPI_CD4    |
| 4916 | HES1    | CXCL12 | CD4  | CXCL12_CD4  |
| 4917 | HES1    | IL16   | CD4  | IL16_CD4    |
| 4918 | HES1    | PIP    | CD4  | PIP_CD4     |
| 4919 | HES1    | HLA-G  | CD4  | HLA-G_CD4   |
| 4920 | HES1    | SLPI   | CD4  | SLPI_CD4    |
| 4921 | RELA    | C4BPA  | CD40 | C4BPA_CD40  |
| 4922 | RELA    | LTB    | CD40 | LTB_CD40    |
| 4923 | STAT1   | C4BPA  | CD40 | C4BPA_CD40  |
| 4924 | STAT1   | LTB    | CD40 | LTB_CD40    |
| 4925 | SPI1    | CD40LG | CD40 | CD40LG_CD40 |
| 4926 | SPI1    | C4BPA  | CD40 | C4BPA_CD40  |
| 4927 | SPI1    | LTB    | CD40 | LTB_CD40    |
| 4928 | NFKB1   | C4BPA  | CD40 | C4BPA_CD40  |
| 4929 | NFKB1   | LTB    | CD40 | LTB_CD40    |

|             |         |      |              |
|-------------|---------|------|--------------|
| 4930 XRCC6  | CD40LG  | CD40 | CD40LG_CD40  |
| 4931 XRCC6  | C4BPA   | CD40 | C4BPA_CD40   |
| 4932 XRCC6  | LTB     | CD40 | LTB_CD40     |
| 4933 NFKBIA | CD40LG  | CD40 | CD40LG_CD40  |
| 4934 NFKBIA | C4BPA   | CD40 | C4BPA_CD40   |
| 4935 NFKBIA | LTB     | CD40 | LTB_CD40     |
| 4936 IRF1   | CD40LG  | CD40 | CD40LG_CD40  |
| 4937 IRF1   | C4BPA   | CD40 | C4BPA_CD40   |
| 4938 IRF1   | LTB     | CD40 | LTB_CD40     |
| 4939 TRERF1 | CD40LG  | CD40 | CD40LG_CD40  |
| 4940 TRERF1 | C4BPA   | CD40 | C4BPA_CD40   |
| 4941 TRERF1 | LTB     | CD40 | LTB_CD40     |
| 4942 STAT6  | CD40LG  | CD40 | CD40LG_CD40  |
| 4943 STAT6  | C4BPA   | CD40 | C4BPA_CD40   |
| 4944 STAT6  | LTB     | CD40 | LTB_CD40     |
| 4945 XRCC5  | CD40LG  | CD40 | CD40LG_CD40  |
| 4946 XRCC5  | C4BPA   | CD40 | C4BPA_CD40   |
| 4947 XRCC5  | LTB     | CD40 | LTB_CD40     |
| 4948 SPIB   | CD40LG  | CD40 | CD40LG_CD40  |
| 4949 SPIB   | C4BPA   | CD40 | C4BPA_CD40   |
| 4950 SPIB   | LTB     | CD40 | LTB_CD40     |
| 4951 RELB   | CD40LG  | CD40 | CD40LG_CD40  |
| 4952 RELB   | C4BPA   | CD40 | C4BPA_CD40   |
| 4953 RELB   | LTB     | CD40 | LTB_CD40     |
| 4954 TRAF6  | CD40LG  | CD40 | CD40LG_CD40  |
| 4955 TRAF6  | C4BPA   | CD40 | C4BPA_CD40   |
| 4956 TRAF6  | LTB     | CD40 | LTB_CD40     |
| 4957 NR3C2  | CD40LG  | CD40 | CD40LG_CD40  |
| 4958 NR3C2  | C4BPA   | CD40 | C4BPA_CD40   |
| 4959 NR3C2  | LTB     | CD40 | LTB_CD40     |
| 4960 TWIST2 | HAS2    | CD44 | HAS2_CD44    |
| 4961 TWIST2 | COL1A2  | CD44 | COL1A2_CD44  |
| 4962 TWIST2 | VIM     | CD44 | VIM_CD44     |
| 4963 TWIST2 | COL14A1 | CD44 | COL14A1_CD44 |
| 4964 TWIST2 | SPP1    | CD44 | SPP1_CD44    |
| 4965 TWIST2 | MMP9    | CD44 | MMP9_CD44    |
| 4966 TWIST2 | FGF2    | CD44 | FGF2_CD44    |
| 4967 TWIST2 | FGF1    | CD44 | FGF1_CD44    |
| 4968 TWIST2 | PKM     | CD44 | PKM_CD44     |
| 4969 TWIST2 | HBEGF   | CD44 | HBEGF_CD44   |
| 4970 TWIST2 | MMP1    | CD44 | MMP1_CD44    |
| 4971 TWIST2 | VCAN    | CD44 | VCAN_CD44    |
| 4972 TWIST2 | MADCAM1 | CD44 | MADCAM1_CD44 |
| 4973 TWIST2 | MMP7    | CD44 | MMP7_CD44    |
| 4974 TWIST2 | HGF     | CD44 | HGF_CD44     |
| 4975 TWIST2 | COL1A1  | CD44 | COL1A1_CD44  |
| 4976 TWIST2 | PSEN1   | CD44 | PSEN1_CD44   |
| 4977 TWIST2 | LPL     | CD44 | LPL_CD44     |
| 4978 TWIST1 | HAS2    | CD44 | HAS2_CD44    |
| 4979 TWIST1 | COL1A2  | CD44 | COL1A2_CD44  |
| 4980 TWIST1 | VIM     | CD44 | VIM_CD44     |
| 4981 TWIST1 | COL14A1 | CD44 | COL14A1_CD44 |
| 4982 TWIST1 | SPP1    | CD44 | SPP1_CD44    |
| 4983 TWIST1 | MMP9    | CD44 | MMP9_CD44    |
| 4984 TWIST1 | FGF2    | CD44 | FGF2_CD44    |
| 4985 TWIST1 | FGF1    | CD44 | FGF1_CD44    |
| 4986 TWIST1 | PKM     | CD44 | PKM_CD44     |
| 4987 TWIST1 | HBEGF   | CD44 | HBEGF_CD44   |

|      |         |         |      |              |
|------|---------|---------|------|--------------|
| 4988 | TWIST1  | VCAN    | CD44 | VCAN_CD44    |
| 4989 | TWIST1  | MADCAM1 | CD44 | MADCAM1_CD44 |
| 4990 | TWIST1  | MMP7    | CD44 | MMP7_CD44    |
| 4991 | TWIST1  | HGF     | CD44 | HGF_CD44     |
| 4992 | TWIST1  | COL1A1  | CD44 | COL1A1_CD44  |
| 4993 | TWIST1  | PSEN1   | CD44 | PSEN1_CD44   |
| 4994 | TWIST1  | LPL     | CD44 | LPL_CD44     |
| 4995 | SMARCA4 | HAS2    | CD44 | HAS2_CD44    |
| 4996 | SMARCA4 | COL1A2  | CD44 | COL1A2_CD44  |
| 4997 | SMARCA4 | VIM     | CD44 | VIM_CD44     |
| 4998 | SMARCA4 | COL14A1 | CD44 | COL14A1_CD44 |
| 4999 | SMARCA4 | SPP1    | CD44 | SPP1_CD44    |
| 5000 | SMARCA4 | MMP9    | CD44 | MMP9_CD44    |
| 5001 | SMARCA4 | FGF2    | CD44 | FGF2_CD44    |
| 5002 | SMARCA4 | FGF1    | CD44 | FGF1_CD44    |
| 5003 | SMARCA4 | PKM     | CD44 | PKM_CD44     |
| 5004 | SMARCA4 | HBEGF   | CD44 | HBEGF_CD44   |
| 5005 | SMARCA4 | MMP1    | CD44 | MMP1_CD44    |
| 5006 | SMARCA4 | VCAN    | CD44 | VCAN_CD44    |
| 5007 | SMARCA4 | FN1     | CD44 | FN1_CD44     |
| 5008 | SMARCA4 | MADCAM1 | CD44 | MADCAM1_CD44 |
| 5009 | SMARCA4 | MMP7    | CD44 | MMP7_CD44    |
| 5010 | SMARCA4 | HGF     | CD44 | HGF_CD44     |
| 5011 | SMARCA4 | COL1A1  | CD44 | COL1A1_CD44  |
| 5012 | SMARCA4 | PSEN1   | CD44 | PSEN1_CD44   |
| 5013 | SMARCA4 | LPL     | CD44 | LPL_CD44     |
| 5014 | SMARCA1 | HAS2    | CD44 | HAS2_CD44    |
| 5015 | SMARCA1 | COL1A2  | CD44 | COL1A2_CD44  |
| 5016 | SMARCA1 | VIM     | CD44 | VIM_CD44     |
| 5017 | SMARCA1 | COL14A1 | CD44 | COL14A1_CD44 |
| 5018 | SMARCA1 | SPP1    | CD44 | SPP1_CD44    |
| 5019 | SMARCA1 | MMP9    | CD44 | MMP9_CD44    |
| 5020 | SMARCA1 | FGF2    | CD44 | FGF2_CD44    |
| 5021 | SMARCA1 | FGF1    | CD44 | FGF1_CD44    |
| 5022 | SMARCA1 | PKM     | CD44 | PKM_CD44     |
| 5023 | SMARCA1 | HBEGF   | CD44 | HBEGF_CD44   |
| 5024 | SMARCA1 | MMP1    | CD44 | MMP1_CD44    |
| 5025 | SMARCA1 | VCAN    | CD44 | VCAN_CD44    |
| 5026 | SMARCA1 | FN1     | CD44 | FN1_CD44     |
| 5027 | SMARCA1 | MADCAM1 | CD44 | MADCAM1_CD44 |
| 5028 | SMARCA1 | MMP7    | CD44 | MMP7_CD44    |
| 5029 | SMARCA1 | HGF     | CD44 | HGF_CD44     |
| 5030 | SMARCA1 | COL1A1  | CD44 | COL1A1_CD44  |
| 5031 | SMARCA1 | PSEN1   | CD44 | PSEN1_CD44   |
| 5032 | SMARCA1 | LPL     | CD44 | LPL_CD44     |
| 5033 | SP1     | COL1A2  | CD44 | COL1A2_CD44  |
| 5034 | SP1     | COL14A1 | CD44 | COL14A1_CD44 |
| 5035 | SP1     | FGF2    | CD44 | FGF2_CD44    |
| 5036 | SP1     | FGF1    | CD44 | FGF1_CD44    |
| 5037 | SP1     | PKM     | CD44 | PKM_CD44     |
| 5038 | SP1     | MMP1    | CD44 | MMP1_CD44    |
| 5039 | SP1     | VCAN    | CD44 | VCAN_CD44    |
| 5040 | SP1     | FN1     | CD44 | FN1_CD44     |
| 5041 | SP1     | MADCAM1 | CD44 | MADCAM1_CD44 |
| 5042 | SP1     | MMP7    | CD44 | MMP7_CD44    |
| 5043 | TCF4    | HAS2    | CD44 | HAS2_CD44    |
| 5044 | TCF4    | COL1A2  | CD44 | COL1A2_CD44  |
| 5045 | TCF4    | COL14A1 | CD44 | COL14A1_CD44 |

|      |        |         |      |              |
|------|--------|---------|------|--------------|
| 5046 | TCF4   | SPP1    | CD44 | SPP1_CD44    |
| 5047 | TCF4   | MMP9    | CD44 | MMP9_CD44    |
| 5048 | TCF4   | FGF2    | CD44 | FGF2_CD44    |
| 5049 | TCF4   | FGF1    | CD44 | FGF1_CD44    |
| 5050 | TCF4   | PKM     | CD44 | PKM_CD44     |
| 5051 | TCF4   | HBEGF   | CD44 | HBEGF_CD44   |
| 5052 | TCF4   | MMP1    | CD44 | MMP1_CD44    |
| 5053 | TCF4   | FN1     | CD44 | FN1_CD44     |
| 5054 | TCF4   | MADCAM1 | CD44 | MADCAM1_CD44 |
| 5055 | TCF4   | MMP7    | CD44 | MMP7_CD44    |
| 5056 | TCF4   | HGF     | CD44 | HGF_CD44     |
| 5057 | TCF4   | COL1A1  | CD44 | COL1A1_CD44  |
| 5058 | TCF4   | PSEN1   | CD44 | PSEN1_CD44   |
| 5059 | TCF4   | LPL     | CD44 | LPL_CD44     |
| 5060 | CTNNB1 | HAS2    | CD44 | HAS2_CD44    |
| 5061 | CTNNB1 | COL1A2  | CD44 | COL1A2_CD44  |
| 5062 | CTNNB1 | COL14A1 | CD44 | COL14A1_CD44 |
| 5063 | CTNNB1 | SPP1    | CD44 | SPP1_CD44    |
| 5064 | CTNNB1 | MMP9    | CD44 | MMP9_CD44    |
| 5065 | CTNNB1 | FGF2    | CD44 | FGF2_CD44    |
| 5066 | CTNNB1 | FGF1    | CD44 | FGF1_CD44    |
| 5067 | CTNNB1 | PKM     | CD44 | PKM_CD44     |
| 5068 | CTNNB1 | HBEGF   | CD44 | HBEGF_CD44   |
| 5069 | CTNNB1 | MMP1    | CD44 | MMP1_CD44    |
| 5070 | CTNNB1 | VCAN    | CD44 | VCAN_CD44    |
| 5071 | CTNNB1 | FN1     | CD44 | FN1_CD44     |
| 5072 | CTNNB1 | MADCAM1 | CD44 | MADCAM1_CD44 |
| 5073 | CTNNB1 | HGF     | CD44 | HGF_CD44     |
| 5074 | CTNNB1 | COL1A1  | CD44 | COL1A1_CD44  |
| 5075 | CTNNB1 | PSEN1   | CD44 | PSEN1_CD44   |
| 5076 | CTNNB1 | LPL     | CD44 | LPL_CD44     |
| 5077 | SNAI2  | HAS2    | CD44 | HAS2_CD44    |
| 5078 | SNAI2  | COL1A2  | CD44 | COL1A2_CD44  |
| 5079 | SNAI2  | VIM     | CD44 | VIM_CD44     |
| 5080 | SNAI2  | COL14A1 | CD44 | COL14A1_CD44 |
| 5081 | SNAI2  | SPP1    | CD44 | SPP1_CD44    |
| 5082 | SNAI2  | FGF2    | CD44 | FGF2_CD44    |
| 5083 | SNAI2  | FGF1    | CD44 | FGF1_CD44    |
| 5084 | SNAI2  | PKM     | CD44 | PKM_CD44     |
| 5085 | SNAI2  | HBEGF   | CD44 | HBEGF_CD44   |
| 5086 | SNAI2  | MMP1    | CD44 | MMP1_CD44    |
| 5087 | SNAI2  | VCAN    | CD44 | VCAN_CD44    |
| 5088 | SNAI2  | FN1     | CD44 | FN1_CD44     |
| 5089 | SNAI2  | MADCAM1 | CD44 | MADCAM1_CD44 |
| 5090 | SNAI2  | MMP7    | CD44 | MMP7_CD44    |
| 5091 | SNAI2  | HGF     | CD44 | HGF_CD44     |
| 5092 | SNAI2  | COL1A1  | CD44 | COL1A1_CD44  |
| 5093 | SNAI2  | PSEN1   | CD44 | PSEN1_CD44   |
| 5094 | SNAI2  | LPL     | CD44 | LPL_CD44     |
| 5095 | HMGA1  | HAS2    | CD44 | HAS2_CD44    |
| 5096 | HMGA1  | COL1A2  | CD44 | COL1A2_CD44  |
| 5097 | HMGA1  | VIM     | CD44 | VIM_CD44     |
| 5098 | HMGA1  | COL14A1 | CD44 | COL14A1_CD44 |
| 5099 | HMGA1  | SPP1    | CD44 | SPP1_CD44    |
| 5100 | HMGA1  | MMP9    | CD44 | MMP9_CD44    |
| 5101 | HMGA1  | FGF2    | CD44 | FGF2_CD44    |
| 5102 | HMGA1  | FGF1    | CD44 | FGF1_CD44    |
| 5103 | HMGA1  | PKM     | CD44 | PKM_CD44     |



|      |         |         |      |              |
|------|---------|---------|------|--------------|
| 5104 | HMGA1   | HBEGF   | CD44 | HBEGF_CD44   |
| 5105 | HMGA1   | MMP1    | CD44 | MMP1_CD44    |
| 5106 | HMGA1   | VCAN    | CD44 | VCAN_CD44    |
| 5107 | HMGA1   | FN1     | CD44 | FN1_CD44     |
| 5108 | HMGA1   | MADCAM1 | CD44 | MADCAM1_CD44 |
| 5109 | HMGA1   | MMP7    | CD44 | MMP7_CD44    |
| 5110 | HMGA1   | HGF     | CD44 | HGF_CD44     |
| 5111 | HMGA1   | COL1A1  | CD44 | COL1A1_CD44  |
| 5112 | HMGA1   | PSEN1   | CD44 | PSEN1_CD44   |
| 5113 | HMGA1   | LPL     | CD44 | LPL_CD44     |
| 5114 | HDAC1   | HAS2    | CD44 | HAS2_CD44    |
| 5115 | HDAC1   | VIM     | CD44 | VIM_CD44     |
| 5116 | HDAC1   | COL14A1 | CD44 | COL14A1_CD44 |
| 5117 | HDAC1   | FGF2    | CD44 | FGF2_CD44    |
| 5118 | HDAC1   | FGF1    | CD44 | FGF1_CD44    |
| 5119 | HDAC1   | PKM     | CD44 | PKM_CD44     |
| 5120 | HDAC1   | HBEGF   | CD44 | HBEGF_CD44   |
| 5121 | HDAC1   | MMP1    | CD44 | MMP1_CD44    |
| 5122 | HDAC1   | VCAN    | CD44 | VCAN_CD44    |
| 5123 | HDAC1   | FN1     | CD44 | FN1_CD44     |
| 5124 | HDAC1   | MADCAM1 | CD44 | MADCAM1_CD44 |
| 5125 | HDAC1   | MMP7    | CD44 | MMP7_CD44    |
| 5126 | HDAC1   | HGF     | CD44 | HGF_CD44     |
| 5127 | HDAC1   | COL1A1  | CD44 | COL1A1_CD44  |
| 5128 | HDAC1   | PSEN1   | CD44 | PSEN1_CD44   |
| 5129 | HDAC1   | LPL     | CD44 | LPL_CD44     |
| 5130 | IKBKB   | HAS2    | CD44 | HAS2_CD44    |
| 5131 | IKBKB   | COL1A2  | CD44 | COL1A2_CD44  |
| 5132 | IKBKB   | VIM     | CD44 | VIM_CD44     |
| 5133 | IKBKB   | COL14A1 | CD44 | COL14A1_CD44 |
| 5134 | IKBKB   | SPP1    | CD44 | SPP1_CD44    |
| 5135 | IKBKB   | FGF2    | CD44 | FGF2_CD44    |
| 5136 | IKBKB   | FGF1    | CD44 | FGF1_CD44    |
| 5137 | IKBKB   | PKM     | CD44 | PKM_CD44     |
| 5138 | IKBKB   | HBEGF   | CD44 | HBEGF_CD44   |
| 5139 | IKBKB   | MMP1    | CD44 | MMP1_CD44    |
| 5140 | IKBKB   | VCAN    | CD44 | VCAN_CD44    |
| 5141 | IKBKB   | FN1     | CD44 | FN1_CD44     |
| 5142 | IKBKB   | MADCAM1 | CD44 | MADCAM1_CD44 |
| 5143 | IKBKB   | MMP7    | CD44 | MMP7_CD44    |
| 5144 | IKBKB   | HGF     | CD44 | HGF_CD44     |
| 5145 | IKBKB   | COL1A1  | CD44 | COL1A1_CD44  |
| 5146 | IKBKB   | PSEN1   | CD44 | PSEN1_CD44   |
| 5147 | IKBKB   | LPL     | CD44 | LPL_CD44     |
| 5148 | SMARCB1 | HAS2    | CD44 | HAS2_CD44    |
| 5149 | SMARCB1 | COL1A2  | CD44 | COL1A2_CD44  |
| 5150 | SMARCB1 | VIM     | CD44 | VIM_CD44     |
| 5151 | SMARCB1 | COL14A1 | CD44 | COL14A1_CD44 |
| 5152 | SMARCB1 | SPP1    | CD44 | SPP1_CD44    |
| 5153 | SMARCB1 | MMP9    | CD44 | MMP9_CD44    |
| 5154 | SMARCB1 | FGF2    | CD44 | FGF2_CD44    |
| 5155 | SMARCB1 | FGF1    | CD44 | FGF1_CD44    |
| 5156 | SMARCB1 | PKM     | CD44 | PKM_CD44     |
| 5157 | SMARCB1 | HBEGF   | CD44 | HBEGF_CD44   |
| 5158 | SMARCB1 | MMP1    | CD44 | MMP1_CD44    |
| 5159 | SMARCB1 | VCAN    | CD44 | VCAN_CD44    |
| 5160 | SMARCB1 | FN1     | CD44 | FN1_CD44     |
| 5161 | SMARCB1 | MADCAM1 | CD44 | MADCAM1_CD44 |

|      |         |          |       |               |
|------|---------|----------|-------|---------------|
| 5162 | SMARCB1 | MMP7     | CD44  | MMP7_CD44     |
| 5163 | SMARCB1 | HGF      | CD44  | HGF_CD44      |
| 5164 | SMARCB1 | COL1A1   | CD44  | COL1A1_CD44   |
| 5165 | SMARCB1 | PSEN1    | CD44  | PSEN1_CD44    |
| 5166 | SMARCB1 | LPL      | CD44  | LPL_CD44      |
| 5167 | MYCN    | HAS2     | CD44  | HAS2_CD44     |
| 5168 | MYCN    | COL1A2   | CD44  | COL1A2_CD44   |
| 5169 | MYCN    | VIM      | CD44  | VIM_CD44      |
| 5170 | MYCN    | COL14A1  | CD44  | COL14A1_CD44  |
| 5171 | MYCN    | SPP1     | CD44  | SPP1_CD44     |
| 5172 | MYCN    | MMP9     | CD44  | MMP9_CD44     |
| 5173 | MYCN    | FGF2     | CD44  | FGF2_CD44     |
| 5174 | MYCN    | FGF1     | CD44  | FGF1_CD44     |
| 5175 | MYCN    | PKM      | CD44  | PKM_CD44      |
| 5176 | MYCN    | HBEGF    | CD44  | HBEGF_CD44    |
| 5177 | MYCN    | MMP1     | CD44  | MMP1_CD44     |
| 5178 | MYCN    | VCAN     | CD44  | VCAN_CD44     |
| 5179 | MYCN    | FN1      | CD44  | FN1_CD44      |
| 5180 | MYCN    | MADCAM1  | CD44  | MADCAM1_CD44  |
| 5181 | MYCN    | MMP7     | CD44  | MMP7_CD44     |
| 5182 | MYCN    | HGF      | CD44  | HGF_CD44      |
| 5183 | MYCN    | COL1A1   | CD44  | COL1A1_CD44   |
| 5184 | MYCN    | PSEN1    | CD44  | PSEN1_CD44    |
| 5185 | MYCN    | LPL      | CD44  | LPL_CD44      |
| 5186 | STAT3   | C3       | CD46  | C3_CD46       |
| 5187 | NFKB1   | APP      | CD74  | APP_CD74      |
| 5188 | RELA    | APP      | CD74  | APP_CD74      |
| 5189 | CHD4    | BTLA     | CD79A | BTLA_CD79A    |
| 5190 | CHD4    | FN1      | CD79A | FN1_CD79A     |
| 5191 | CHD4    | IL8      | CD79A | IL8_CD79A     |
| 5192 | PAX5    | BTLA     | CD79A | BTLA_CD79A    |
| 5193 | PAX5    | FN1      | CD79A | FN1_CD79A     |
| 5194 | PAX5    | IL8      | CD79A | IL8_CD79A     |
| 5195 | TP53    | HBEGF    | CD82  | HBEGF_CD82    |
| 5196 | HDAC1   | HBEGF    | CD82  | HBEGF_CD82    |
| 5197 | TFAP2A  | HBEGF    | CD82  | HBEGF_CD82    |
| 5198 | JUNB    | HBEGF    | CD82  | HBEGF_CD82    |
| 5199 | ATF3    | HBEGF    | CD82  | HBEGF_CD82    |
| 5200 | JUN     | HBEGF    | CD82  | HBEGF_CD82    |
| 5201 | SP1     | NCAN     | CDH2  | NCAN_CDH2     |
| 5202 | SP1     | CDH1     | CDH2  | CDH1_CDH2     |
| 5203 | TWIST2  | NCAN     | CDH2  | NCAN_CDH2     |
| 5204 | TWIST1  | NCAN     | CDH2  | NCAN_CDH2     |
| 5205 | SP3     | NCAN     | CDH2  | NCAN_CDH2     |
| 5206 | SP3     | CDH1     | CDH2  | CDH1_CDH2     |
| 5207 | KLF8    | NCAN     | CDH2  | NCAN_CDH2     |
| 5208 | MZF1    | NCAN     | CDH2  | NCAN_CDH2     |
| 5209 | MZF1    | CDH1     | CDH2  | CDH1_CDH2     |
| 5210 | SNAI1   | NCAN     | CDH2  | NCAN_CDH2     |
| 5211 | MSX2    | NCAN     | CDH2  | NCAN_CDH2     |
| 5212 | MSX2    | CDH1     | CDH2  | CDH1_CDH2     |
| 5213 | SNAI2   | NCAN     | CDH2  | NCAN_CDH2     |
| 5214 | AR      | NCAN     | CDH2  | NCAN_CDH2     |
| 5215 | DNMT3A  | MMP7     | CDH6  | MMP7_CDH6     |
| 5216 | SP3     | HSP90AA1 | CFTR  | HSP90AA1_CFTR |
| 5217 | CDX2    | HSP90AA1 | CFTR  | HSP90AA1_CFTR |
| 5218 | FOXA2   | HSP90AA1 | CFTR  | HSP90AA1_CFTR |
| 5219 | SP1     | HSP90AA1 | CFTR  | HSP90AA1_CFTR |

|             |          |        |               |
|-------------|----------|--------|---------------|
| 5220 FOXI1  | HSP90AA1 | CFTR   | HSP90AA1_CFTR |
| 5221 ATF1   | HSP90AA1 | CFTR   | HSP90AA1_CFTR |
| 5222 CUX1   | HSP90AA1 | CFTR   | HSP90AA1_CFTR |
| 5223 RELA   | HSP90AA1 | CFTR   | HSP90AA1_CFTR |
| 5224 NFKB1  | HSP90AA1 | CFTR   | HSP90AA1_CFTR |
| 5225 TFAP2A | HSP90AA1 | CFTR   | HSP90AA1_CFTR |
| 5226 YY1    | HSP90AA1 | CFTR   | HSP90AA1_CFTR |
| 5227 NFE2L2 | HSP90AA1 | CFTR   | HSP90AA1_CFTR |
| 5228 SRF    | HSP90AA1 | CFTR   | HSP90AA1_CFTR |
| 5229 FOXA1  | HSP90AA1 | CFTR   | HSP90AA1_CFTR |
| 5230 USF2   | HSP90AA1 | CFTR   | HSP90AA1_CFTR |
| 5231 STAT6  | GNAI2    | CNR1   | GNAI2_CNR1    |
| 5232 STAT6  | TCN2     | CNR1   | TCN2_CNR1     |
| 5233 ETS1   | CD55     | CR1    | CD55_CR1      |
| 5234 ETS1   | C3       | CR1    | C3_CR1        |
| 5235 ETS1   | C1QA     | CR1    | C1QA_CR1      |
| 5236 RELA   | GNAS     | CRHR1  | GNAS_CRHR1    |
| 5237 RELA   | CALM1    | CRHR1  | CALM1_CRHR1   |
| 5238 NFKB1  | GNAS     | CRHR1  | GNAS_CRHR1    |
| 5239 NFKB1  | CALM1    | CRHR1  | CALM1_CRHR1   |
| 5240 RUNX1  | IL34     | CSF1R  | IL34_CSF1R    |
| 5241 RUNX1  | CSF3     | CSF1R  | CSF3_CSF1R    |
| 5242 NR3C1  | IL34     | CSF1R  | IL34_CSF1R    |
| 5243 NR3C1  | CSF2     | CSF1R  | CSF2_CSF1R    |
| 5244 NR3C1  | CSF3     | CSF1R  | CSF3_CSF1R    |
| 5245 NR3C1  | CSF1     | CSF1R  | CSF1_CSF1R    |
| 5246 CEBPA  | CSF2     | CSF2RA | CSF2_CSF2RA   |
| 5247 SPI1   | CSF2     | CSF2RA | CSF2_CSF2RA   |
| 5248 CEBPA  | CSF2     | CSF3R  | CSF2_CSF3R    |
| 5249 CEBPA  | CSF3     | CSF3R  | CSF3_CSF3R    |
| 5250 MYB    | CSF2     | CSF3R  | CSF2_CSF3R    |
| 5251 MYB    | CSF3     | CSF3R  | CSF3_CSF3R    |
| 5252 CEBPB  | CSF2     | CSF3R  | CSF2_CSF3R    |
| 5253 CEBPB  | CSF3     | CSF3R  | CSF3_CSF3R    |
| 5254 SPI1   | CSF2     | CSF3R  | CSF2_CSF3R    |
| 5255 SPI1   | CSF3     | CSF3R  | CSF3_CSF3R    |
| 5256 ETS2   | CSF3     | CSF3R  | CSF3_CSF3R    |
| 5257 ETS1   | CSF3     | CSF3R  | CSF3_CSF3R    |
| 5258 SPI1   | GNAI2    | CXCR1  | GNAI2_CXCR1   |
| 5259 NFKB1  | VASP     | CXCR2  | VASP_CXCR2    |
| 5260 NFKB1  | GNAI2    | CXCR2  | GNAI2_CXCR2   |
| 5261 CEBPA  | VASP     | CXCR2  | VASP_CXCR2    |
| 5262 CEBPA  | GNAI2    | CXCR2  | GNAI2_CXCR2   |
| 5263 USF2   | VASP     | CXCR2  | VASP_CXCR2    |
| 5264 USF2   | GNAI2    | CXCR2  | GNAI2_CXCR2   |
| 5265 RELA   | VASP     | CXCR2  | VASP_CXCR2    |
| 5266 RELA   | GNAI2    | CXCR2  | GNAI2_CXCR2   |
| 5267 TBX21  | CCL5     | CXCR3  | CCL5_CXCR3    |
| 5268 TBX21  | CCL20    | CXCR3  | CCL20_CXCR3   |
| 5269 TBX21  | CCL21    | CXCR3  | CCL21_CXCR3   |
| 5270 TBX21  | CCL13    | CXCR3  | CCL13_CXCR3   |
| 5271 TBX21  | CXCL12   | CXCR3  | CXCL12_CXCR3  |
| 5272 TBX21  | GNAI2    | CXCR3  | GNAI2_CXCR3   |
| 5273 TBX21  | PF4      | CXCR3  | PF4_CXCR3     |
| 5274 TBX21  | CCL19    | CXCR3  | CCL19_CXCR3   |
| 5275 TBX21  | CXCL9    | CXCR3  | CXCL9_CXCR3   |
| 5276 TBX21  | CXCL11   | CXCR3  | CXCL11_CXCR3  |
| 5277 TBX21  | CXCL10   | CXCR3  | CXCL10_CXCR3  |

|      |        |        |       |              |
|------|--------|--------|-------|--------------|
| 5278 | TBX21  | CCL11  | CXCR3 | CCL11_CXCR3  |
| 5279 | TBX21  | CXCL13 | CXCR3 | CXCL13_CXCR3 |
| 5280 | TBX21  | CCL7   | CXCR3 | CCL7_CXCR3   |
| 5281 | NRF1   | CXCL12 | CXCR4 | CXCL12_CXCR4 |
| 5282 | NRF1   | CEL    | CXCR4 | CEL_CXCR4    |
| 5283 | NRF1   | ZG16B  | CXCR4 | ZG16B_CXCR4  |
| 5284 | NRF1   | TGFB1  | CXCR4 | TGFB1_CXCR4  |
| 5285 | USF2   | CXCL12 | CXCR4 | CXCL12_CXCR4 |
| 5286 | USF2   | CEL    | CXCR4 | CEL_CXCR4    |
| 5287 | USF2   | ZG16B  | CXCR4 | ZG16B_CXCR4  |
| 5288 | HIF1A  | CEL    | CXCR4 | CEL_CXCR4    |
| 5289 | HIF1A  | ZG16B  | CXCR4 | ZG16B_CXCR4  |
| 5290 | HIF1A  | TGFB1  | CXCR4 | TGFB1_CXCR4  |
| 5291 | ZBTB16 | CXCL12 | CXCR4 | CXCL12_CXCR4 |
| 5292 | ZBTB16 | CEL    | CXCR4 | CEL_CXCR4    |
| 5293 | ZBTB16 | ZG16B  | CXCR4 | ZG16B_CXCR4  |
| 5294 | ZBTB16 | TGFB1  | CXCR4 | TGFB1_CXCR4  |
| 5295 | CREB1  | CXCL12 | CXCR4 | CXCL12_CXCR4 |
| 5296 | CREB1  | CEL    | CXCR4 | CEL_CXCR4    |
| 5297 | CREB1  | ZG16B  | CXCR4 | ZG16B_CXCR4  |
| 5298 | CREB1  | TGFB1  | CXCR4 | TGFB1_CXCR4  |
| 5299 | YY1    | CXCL12 | CXCR4 | CXCL12_CXCR4 |
| 5300 | YY1    | CEL    | CXCR4 | CEL_CXCR4    |
| 5301 | YY1    | ZG16B  | CXCR4 | ZG16B_CXCR4  |
| 5302 | YY1    | TGFB1  | CXCR4 | TGFB1_CXCR4  |
| 5303 | NFKB1  | CEL    | CXCR4 | CEL_CXCR4    |
| 5304 | NFKB1  | ZG16B  | CXCR4 | ZG16B_CXCR4  |
| 5305 | KLF2   | CXCL12 | CXCR4 | CXCL12_CXCR4 |
| 5306 | KLF2   | CEL    | CXCR4 | CEL_CXCR4    |
| 5307 | KLF2   | ZG16B  | CXCR4 | ZG16B_CXCR4  |
| 5308 | KLF2   | TGFB1  | CXCR4 | TGFB1_CXCR4  |
| 5309 | YBX1   | CXCL12 | CXCR4 | CXCL12_CXCR4 |
| 5310 | YBX1   | CEL    | CXCR4 | CEL_CXCR4    |
| 5311 | YBX1   | ZG16B  | CXCR4 | ZG16B_CXCR4  |
| 5312 | YBX1   | TGFB1  | CXCR4 | TGFB1_CXCR4  |
| 5313 | DNMT1  | CXCL12 | CXCR4 | CXCL12_CXCR4 |
| 5314 | DNMT1  | CEL    | CXCR4 | CEL_CXCR4    |
| 5315 | DNMT1  | ZG16B  | CXCR4 | ZG16B_CXCR4  |
| 5316 | DNMT1  | TGFB1  | CXCR4 | TGFB1_CXCR4  |
| 5317 | CREB3  | CXCL12 | CXCR4 | CXCL12_CXCR4 |
| 5318 | CREB3  | CEL    | CXCR4 | CEL_CXCR4    |
| 5319 | CREB3  | ZG16B  | CXCR4 | ZG16B_CXCR4  |
| 5320 | CREB3  | TGFB1  | CXCR4 | TGFB1_CXCR4  |
| 5321 | SNAI2  | CEL    | CXCR4 | CEL_CXCR4    |
| 5322 | SNAI2  | ZG16B  | CXCR4 | ZG16B_CXCR4  |
| 5323 | SNAI2  | TGFB1  | CXCR4 | TGFB1_CXCR4  |
| 5324 | IRF2   | CXCL12 | CXCR4 | CXCL12_CXCR4 |
| 5325 | IRF2   | CEL    | CXCR4 | CEL_CXCR4    |
| 5326 | IRF2   | ZG16B  | CXCR4 | ZG16B_CXCR4  |
| 5327 | IRF2   | TGFB1  | CXCR4 | TGFB1_CXCR4  |
| 5328 | RELA   | CEL    | CXCR4 | CEL_CXCR4    |
| 5329 | RELA   | ZG16B  | CXCR4 | ZG16B_CXCR4  |
| 5330 | RELA   | TGFB1  | CXCR4 | TGFB1_CXCR4  |
| 5331 | KLF5   | CXCL12 | CXCR4 | CXCL12_CXCR4 |
| 5332 | KLF5   | CEL    | CXCR4 | CEL_CXCR4    |
| 5333 | KLF5   | ZG16B  | CXCR4 | ZG16B_CXCR4  |
| 5334 | KLF5   | TGFB1  | CXCR4 | TGFB1_CXCR4  |
| 5335 | VHL    | CXCL12 | CXCR4 | CXCL12_CXCR4 |

|             |          |        |               |
|-------------|----------|--------|---------------|
| 5336 VHL    | CEL      | CXCR4  | CEL_CXCR4     |
| 5337 VHL    | ZG16B    | CXCR4  | ZG16B_CXCR4   |
| 5338 VHL    | TGFB1    | CXCR4  | TGFB1_CXCR4   |
| 5339 FOXO1  | CXCL12   | CXCR4  | CXCL12_CXCR4  |
| 5340 FOXO1  | CEL      | CXCR4  | CEL_CXCR4     |
| 5341 FOXO1  | ZG16B    | CXCR4  | ZG16B_CXCR4   |
| 5342 FOXO1  | TGFB1    | CXCR4  | TGFB1_CXCR4   |
| 5343 HDAC3  | CXCL12   | CXCR4  | CXCL12_CXCR4  |
| 5344 HDAC3  | CEL      | CXCR4  | CEL_CXCR4     |
| 5345 HDAC3  | ZG16B    | CXCR4  | ZG16B_CXCR4   |
| 5346 HDAC3  | TGFB1    | CXCR4  | TGFB1_CXCR4   |
| 5347 USF1   | CXCL12   | CXCR4  | CXCL12_CXCR4  |
| 5348 USF1   | CEL      | CXCR4  | CEL_CXCR4     |
| 5349 USF1   | ZG16B    | CXCR4  | ZG16B_CXCR4   |
| 5350 ETS1   | CXCL12   | CXCR4  | CXCL12_CXCR4  |
| 5351 ETS1   | CEL      | CXCR4  | CEL_CXCR4     |
| 5352 ETS1   | ZG16B    | CXCR4  | ZG16B_CXCR4   |
| 5353 ETS1   | TGFB1    | CXCR4  | TGFB1_CXCR4   |
| 5354 MYC    | CXCL12   | CXCR4  | CXCL12_CXCR4  |
| 5355 MYC    | CEL      | CXCR4  | CEL_CXCR4     |
| 5356 MYC    | ZG16B    | CXCR4  | ZG16B_CXCR4   |
| 5357 MYC    | TGFB1    | CXCR4  | TGFB1_CXCR4   |
| 5358 PAX3   | CXCL12   | CXCR4  | CXCL12_CXCR4  |
| 5359 PAX3   | CEL      | CXCR4  | CEL_CXCR4     |
| 5360 PAX3   | ZG16B    | CXCR4  | ZG16B_CXCR4   |
| 5361 PAX3   | TGFB1    | CXCR4  | TGFB1_CXCR4   |
| 5362 ERG    | CXCL12   | CXCR4  | CXCL12_CXCR4  |
| 5363 ERG    | CEL      | CXCR4  | CEL_CXCR4     |
| 5364 ERG    | ZG16B    | CXCR4  | ZG16B_CXCR4   |
| 5365 ERG    | TGFB1    | CXCR4  | TGFB1_CXCR4   |
| 5366 RARA   | CXCL13   | CXCR5  | CXCL13_CXCR5  |
| 5367 RXRA   | CXCL13   | CXCR5  | CXCL13_CXCR5  |
| 5368 TFAP2A | SEMA4B   | DCBLD2 | SEMA4B_DCBLD2 |
| 5369 NFKB1  | GNAI2    | DRD2   | GNAI2_DRD2    |
| 5370 RELA   | GNAI2    | DRD2   | GNAI2_DRD2    |
| 5371 SP1    | GNAI2    | EDNRB  | GNAI2_EDNRB   |
| 5372 SOX10  | GNAI2    | EDNRB  | GNAI2_EDNRB   |
| 5373 HIF1A  | GNAI2    | EDNRB  | GNAI2_EDNRB   |
| 5374 BRCA1  | FGL1     | EGFR   | FGL1_EGFR     |
| 5375 BRCA1  | GNAI2    | EGFR   | GNAI2_EGFR    |
| 5376 BRCA1  | CALM2    | EGFR   | CALM2_EGFR    |
| 5377 BRCA1  | CDH1     | EGFR   | CDH1_EGFR     |
| 5378 BRCA1  | BTC      | EGFR   | BTC_EGFR      |
| 5379 BRCA1  | UBA52    | EGFR   | UBA52_EGFR    |
| 5380 BRCA1  | CAMP     | EGFR   | CAMP_EGFR     |
| 5381 BRCA1  | ANXA1    | EGFR   | ANXA1_EGFR    |
| 5382 BRCA1  | AREGB    | EGFR   | AREGB_EGFR    |
| 5383 BRCA1  | NRG4     | EGFR   | NRG4_EGFR     |
| 5384 BRCA1  | VCAN     | EGFR   | VCAN_EGFR     |
| 5385 BRCA1  | ICAM1    | EGFR   | ICAM1_EGFR    |
| 5386 BRCA1  | TNC      | EGFR   | TNC_EGFR      |
| 5387 BRCA1  | EREG     | EGFR   | EREG_EGFR     |
| 5388 BRCA1  | L1CAM    | EGFR   | L1CAM_EGFR    |
| 5389 BRCA1  | CALM3    | EGFR   | CALM3_EGFR    |
| 5390 BRCA1  | HSP90AA1 | EGFR   | HSP90AA1_EGFR |
| 5391 BRCA1  | AMH      | EGFR   | AMH_EGFR      |
| 5392 BRCA1  | CALM1    | EGFR   | CALM1_EGFR    |
| 5393 BRCA1  | SPINK1   | EGFR   | SPINK1_EGFR   |

|             |          |      |               |
|-------------|----------|------|---------------|
| 5394 BRCA1  | FGF1     | EGFR | FGF1_EGFR     |
| 5395 BRCA1  | FGF13    | EGFR | FGF13_EGFR    |
| 5396 BRCA1  | TGFA     | EGFR | TGFA_EGFR     |
| 5397 BRCA1  | HBEGF    | EGFR | HBEGF_EGFR    |
| 5398 BRCA1  | EGF      | EGFR | EGF_EGFR      |
| 5399 BRCA1  | ZP3      | EGFR | ZP3_EGFR      |
| 5400 BRCA1  | BCAN     | EGFR | BCAN_EGFR     |
| 5401 BRCA1  | EPGN     | EGFR | EPGN_EGFR     |
| 5402 BRCA1  | DCN      | EGFR | DCN_EGFR      |
| 5403 BRCA1  | EFEMP1   | EGFR | EFEMP1_EGFR   |
| 5404 TSG101 | FGL1     | EGFR | FGL1_EGFR     |
| 5405 TSG101 | GNAI2    | EGFR | GNAI2_EGFR    |
| 5406 TSG101 | CALM2    | EGFR | CALM2_EGFR    |
| 5407 TSG101 | CDH1     | EGFR | CDH1_EGFR     |
| 5408 TSG101 | BTC      | EGFR | BTC_EGFR      |
| 5409 TSG101 | UBA52    | EGFR | UBA52_EGFR    |
| 5410 TSG101 | CAMP     | EGFR | CAMP_EGFR     |
| 5411 TSG101 | ANXA1    | EGFR | ANXA1_EGFR    |
| 5412 TSG101 | AREGB    | EGFR | AREGB_EGFR    |
| 5413 TSG101 | NRG4     | EGFR | NRG4_EGFR     |
| 5414 TSG101 | VCAN     | EGFR | VCAN_EGFR     |
| 5415 TSG101 | ICAM1    | EGFR | ICAM1_EGFR    |
| 5416 TSG101 | TNC      | EGFR | TNC_EGFR      |
| 5417 TSG101 | EREG     | EGFR | EREG_EGFR     |
| 5418 TSG101 | L1CAM    | EGFR | L1CAM_EGFR    |
| 5419 TSG101 | CALM3    | EGFR | CALM3_EGFR    |
| 5420 TSG101 | HSP90AA1 | EGFR | HSP90AA1_EGFR |
| 5421 TSG101 | AMH      | EGFR | AMH_EGFR      |
| 5422 TSG101 | CALM1    | EGFR | CALM1_EGFR    |
| 5423 TSG101 | VEGFA    | EGFR | VEGFA_EGFR    |
| 5424 TSG101 | SPINK1   | EGFR | SPINK1_EGFR   |
| 5425 TSG101 | FGF1     | EGFR | FGF1_EGFR     |
| 5426 TSG101 | AREG     | EGFR | AREG_EGFR     |
| 5427 TSG101 | FGF13    | EGFR | FGF13_EGFR    |
| 5428 TSG101 | TGFA     | EGFR | TGFA_EGFR     |
| 5429 TSG101 | HBEGF    | EGFR | HBEGF_EGFR    |
| 5430 TSG101 | EGF      | EGFR | EGF_EGFR      |
| 5431 TSG101 | ZP3      | EGFR | ZP3_EGFR      |
| 5432 TSG101 | BCAN     | EGFR | BCAN_EGFR     |
| 5433 TSG101 | EPGN     | EGFR | EPGN_EGFR     |
| 5434 TSG101 | DCN      | EGFR | DCN_EGFR      |
| 5435 TSG101 | EFEMP1   | EGFR | EFEMP1_EGFR   |
| 5436 JUNB   | FGL1     | EGFR | FGL1_EGFR     |
| 5437 JUNB   | GNAI2    | EGFR | GNAI2_EGFR    |
| 5438 JUNB   | CALM2    | EGFR | CALM2_EGFR    |
| 5439 JUNB   | CDH1     | EGFR | CDH1_EGFR     |
| 5440 JUNB   | BTC      | EGFR | BTC_EGFR      |
| 5441 JUNB   | UBA52    | EGFR | UBA52_EGFR    |
| 5442 JUNB   | CAMP     | EGFR | CAMP_EGFR     |
| 5443 JUNB   | ANXA1    | EGFR | ANXA1_EGFR    |
| 5444 JUNB   | AREGB    | EGFR | AREGB_EGFR    |
| 5445 JUNB   | NRG4     | EGFR | NRG4_EGFR     |
| 5446 JUNB   | VCAN     | EGFR | VCAN_EGFR     |
| 5447 JUNB   | ICAM1    | EGFR | ICAM1_EGFR    |
| 5448 JUNB   | TNC      | EGFR | TNC_EGFR      |
| 5449 JUNB   | EREG     | EGFR | EREG_EGFR     |
| 5450 JUNB   | L1CAM    | EGFR | L1CAM_EGFR    |
| 5451 JUNB   | CALM3    | EGFR | CALM3_EGFR    |

|      |      |          |      |               |
|------|------|----------|------|---------------|
| 5452 | JUNB | HSP90AA1 | EGFR | HSP90AA1_EGFR |
| 5453 | JUNB | AMH      | EGFR | AMH_EGFR      |
| 5454 | JUNB | CALM1    | EGFR | CALM1_EGFR    |
| 5455 | JUNB | VEGFA    | EGFR | VEGFA_EGFR    |
| 5456 | JUNB | SPINK1   | EGFR | SPINK1_EGFR   |
| 5457 | JUNB | FGF1     | EGFR | FGF1_EGFR     |
| 5458 | JUNB | AREG     | EGFR | AREG_EGFR     |
| 5459 | JUNB | FGF13    | EGFR | FGF13_EGFR    |
| 5460 | JUNB | TGFA     | EGFR | TGFA_EGFR     |
| 5461 | JUNB | HBEGF    | EGFR | HBEGF_EGFR    |
| 5462 | JUNB | EGF      | EGFR | EGF_EGFR      |
| 5463 | JUNB | ZP3      | EGFR | ZP3_EGFR      |
| 5464 | JUNB | BCAN     | EGFR | BCAN_EGFR     |
| 5465 | JUNB | EPGN     | EGFR | EPGN_EGFR     |
| 5466 | JUNB | DCN      | EGFR | DCN_EGFR      |
| 5467 | JUNB | EFEMP1   | EGFR | EFEMP1_EGFR   |
| 5468 | ESR1 | FGL1     | EGFR | FGL1_EGFR     |
| 5469 | ESR1 | GNAI2    | EGFR | GNAI2_EGFR    |
| 5470 | ESR1 | CALM2    | EGFR | CALM2_EGFR    |
| 5471 | ESR1 | BTC      | EGFR | BTC_EGFR      |
| 5472 | ESR1 | UBA52    | EGFR | UBA52_EGFR    |
| 5473 | ESR1 | CAMP     | EGFR | CAMP_EGFR     |
| 5474 | ESR1 | ANXA1    | EGFR | ANXA1_EGFR    |
| 5475 | ESR1 | AREGB    | EGFR | AREGB_EGFR    |
| 5476 | ESR1 | NRG4     | EGFR | NRG4_EGFR     |
| 5477 | ESR1 | VCAN     | EGFR | VCAN_EGFR     |
| 5478 | ESR1 | ICAM1    | EGFR | ICAM1_EGFR    |
| 5479 | ESR1 | TNC      | EGFR | TNC_EGFR      |
| 5480 | ESR1 | EREG     | EGFR | EREG_EGFR     |
| 5481 | ESR1 | L1CAM    | EGFR | L1CAM_EGFR    |
| 5482 | ESR1 | CALM3    | EGFR | CALM3_EGFR    |
| 5483 | ESR1 | HSP90AA1 | EGFR | HSP90AA1_EGFR |
| 5484 | ESR1 | CALM1    | EGFR | CALM1_EGFR    |
| 5485 | ESR1 | SPINK1   | EGFR | SPINK1_EGFR   |
| 5486 | ESR1 | FGF1     | EGFR | FGF1_EGFR     |
| 5487 | ESR1 | AREG     | EGFR | AREG_EGFR     |
| 5488 | ESR1 | FGF13    | EGFR | FGF13_EGFR    |
| 5489 | ESR1 | HBEGF    | EGFR | HBEGF_EGFR    |
| 5490 | ESR1 | EGF      | EGFR | EGF_EGFR      |
| 5491 | ESR1 | ZP3      | EGFR | ZP3_EGFR      |
| 5492 | ESR1 | BCAN     | EGFR | BCAN_EGFR     |
| 5493 | ESR1 | EPGN     | EGFR | EPGN_EGFR     |
| 5494 | ESR1 | DCN      | EGFR | DCN_EGFR      |
| 5495 | ESR1 | EFEMP1   | EGFR | EFEMP1_EGFR   |
| 5496 | YY1  | FGL1     | EGFR | FGL1_EGFR     |
| 5497 | YY1  | GNAI2    | EGFR | GNAI2_EGFR    |
| 5498 | YY1  | CALM2    | EGFR | CALM2_EGFR    |
| 5499 | YY1  | CDH1     | EGFR | CDH1_EGFR     |
| 5500 | YY1  | BTC      | EGFR | BTC_EGFR      |
| 5501 | YY1  | UBA52    | EGFR | UBA52_EGFR    |
| 5502 | YY1  | CAMP     | EGFR | CAMP_EGFR     |
| 5503 | YY1  | ANXA1    | EGFR | ANXA1_EGFR    |
| 5504 | YY1  | AREGB    | EGFR | AREGB_EGFR    |
| 5505 | YY1  | NRG4     | EGFR | NRG4_EGFR     |
| 5506 | YY1  | VCAN     | EGFR | VCAN_EGFR     |
| 5507 | YY1  | ICAM1    | EGFR | ICAM1_EGFR    |
| 5508 | YY1  | TNC      | EGFR | TNC_EGFR      |
| 5509 | YY1  | EREG     | EGFR | EREG_EGFR     |

|            |          |      |               |
|------------|----------|------|---------------|
| 5510 YY1   | L1CAM    | EGFR | L1CAM_EGFR    |
| 5511 YY1   | CALM3    | EGFR | CALM3_EGFR    |
| 5512 YY1   | HSP90AA1 | EGFR | HSP90AA1_EGFR |
| 5513 YY1   | AMH      | EGFR | AMH_EGFR      |
| 5514 YY1   | CALM1    | EGFR | CALM1_EGFR    |
| 5515 YY1   | VEGFA    | EGFR | VEGFA_EGFR    |
| 5516 YY1   | SPINK1   | EGFR | SPINK1_EGFR   |
| 5517 YY1   | FGF1     | EGFR | FGF1_EGFR     |
| 5518 YY1   | AREG     | EGFR | AREG_EGFR     |
| 5519 YY1   | FGF13    | EGFR | FGF13_EGFR    |
| 5520 YY1   | TGFA     | EGFR | TGFA_EGFR     |
| 5521 YY1   | HBEGF    | EGFR | HBEGF_EGFR    |
| 5522 YY1   | EGF      | EGFR | EGF_EGFR      |
| 5523 YY1   | ZP3      | EGFR | ZP3_EGFR      |
| 5524 YY1   | BCAN     | EGFR | BCAN_EGFR     |
| 5525 YY1   | EPGN     | EGFR | EPGN_EGFR     |
| 5526 YY1   | DCN      | EGFR | DCN_EGFR      |
| 5527 YY1   | EFEMP1   | EGFR | EFEMP1_EGFR   |
| 5528 HOXB7 | FGL1     | EGFR | FGL1_EGFR     |
| 5529 HOXB7 | GNAI2    | EGFR | GNAI2_EGFR    |
| 5530 HOXB7 | CALM2    | EGFR | CALM2_EGFR    |
| 5531 HOXB7 | CDH1     | EGFR | CDH1_EGFR     |
| 5532 HOXB7 | BTC      | EGFR | BTC_EGFR      |
| 5533 HOXB7 | UBA52    | EGFR | UBA52_EGFR    |
| 5534 HOXB7 | CAMP     | EGFR | CAMP_EGFR     |
| 5535 HOXB7 | ANXA1    | EGFR | ANXA1_EGFR    |
| 5536 HOXB7 | AREGB    | EGFR | AREGB_EGFR    |
| 5537 HOXB7 | NRG4     | EGFR | NRG4_EGFR     |
| 5538 HOXB7 | VCAN     | EGFR | VCAN_EGFR     |
| 5539 HOXB7 | ICAM1    | EGFR | ICAM1_EGFR    |
| 5540 HOXB7 | TNC      | EGFR | TNC_EGFR      |
| 5541 HOXB7 | EREG     | EGFR | EREG_EGFR     |
| 5542 HOXB7 | L1CAM    | EGFR | L1CAM_EGFR    |
| 5543 HOXB7 | CALM3    | EGFR | CALM3_EGFR    |
| 5544 HOXB7 | HSP90AA1 | EGFR | HSP90AA1_EGFR |
| 5545 HOXB7 | AMH      | EGFR | AMH_EGFR      |
| 5546 HOXB7 | CALM1    | EGFR | CALM1_EGFR    |
| 5547 HOXB7 | SPINK1   | EGFR | SPINK1_EGFR   |
| 5548 HOXB7 | FGF1     | EGFR | FGF1_EGFR     |
| 5549 HOXB7 | AREG     | EGFR | AREG_EGFR     |
| 5550 HOXB7 | FGF13    | EGFR | FGF13_EGFR    |
| 5551 HOXB7 | TGFA     | EGFR | TGFA_EGFR     |
| 5552 HOXB7 | HBEGF    | EGFR | HBEGF_EGFR    |
| 5553 HOXB7 | EGF      | EGFR | EGF_EGFR      |
| 5554 HOXB7 | ZP3      | EGFR | ZP3_EGFR      |
| 5555 HOXB7 | BCAN     | EGFR | BCAN_EGFR     |
| 5556 HOXB7 | EPGN     | EGFR | EPGN_EGFR     |
| 5557 HOXB7 | DCN      | EGFR | DCN_EGFR      |
| 5558 HOXB7 | EFEMP1   | EGFR | EFEMP1_EGFR   |
| 5559 BCL3  | FGL1     | EGFR | FGL1_EGFR     |
| 5560 BCL3  | GNAI2    | EGFR | GNAI2_EGFR    |
| 5561 BCL3  | CALM2    | EGFR | CALM2_EGFR    |
| 5562 BCL3  | CDH1     | EGFR | CDH1_EGFR     |
| 5563 BCL3  | BTC      | EGFR | BTC_EGFR      |
| 5564 BCL3  | UBA52    | EGFR | UBA52_EGFR    |
| 5565 BCL3  | CAMP     | EGFR | CAMP_EGFR     |
| 5566 BCL3  | ANXA1    | EGFR | ANXA1_EGFR    |
| 5567 BCL3  | AREGB    | EGFR | AREGB_EGFR    |



|           |          |      |               |
|-----------|----------|------|---------------|
| 5568 BCL3 | NRG4     | EGFR | NRG4_EGFR     |
| 5569 BCL3 | VCAN     | EGFR | VCAN_EGFR     |
| 5570 BCL3 | ICAM1    | EGFR | ICAM1_EGFR    |
| 5571 BCL3 | TNC      | EGFR | TNC_EGFR      |
| 5572 BCL3 | EREG     | EGFR | EREG_EGFR     |
| 5573 BCL3 | L1CAM    | EGFR | L1CAM_EGFR    |
| 5574 BCL3 | CALM3    | EGFR | CALM3_EGFR    |
| 5575 BCL3 | HSP90AA1 | EGFR | HSP90AA1_EGFR |
| 5576 BCL3 | AMH      | EGFR | AMH_EGFR      |
| 5577 BCL3 | CALM1    | EGFR | CALM1_EGFR    |
| 5578 BCL3 | VEGFA    | EGFR | VEGFA_EGFR    |
| 5579 BCL3 | SPINK1   | EGFR | SPINK1_EGFR   |
| 5580 BCL3 | FGF1     | EGFR | FGF1_EGFR     |
| 5581 BCL3 | AREG     | EGFR | AREG_EGFR     |
| 5582 BCL3 | FGF13    | EGFR | FGF13_EGFR    |
| 5583 BCL3 | TGFA     | EGFR | TGFA_EGFR     |
| 5584 BCL3 | HBEGF    | EGFR | HBEGF_EGFR    |
| 5585 BCL3 | EGF      | EGFR | EGF_EGFR      |
| 5586 BCL3 | ZP3      | EGFR | ZP3_EGFR      |
| 5587 BCL3 | BCAN     | EGFR | BCAN_EGFR     |
| 5588 BCL3 | EPGN     | EGFR | EPGN_EGFR     |
| 5589 BCL3 | DCN      | EGFR | DCN_EGFR      |
| 5590 BCL3 | EFEMP1   | EGFR | EFEMP1_EGFR   |
| 5591 YBX1 | FGL1     | EGFR | FGL1_EGFR     |
| 5592 YBX1 | GNAI2    | EGFR | GNAI2_EGFR    |
| 5593 YBX1 | CALM2    | EGFR | CALM2_EGFR    |
| 5594 YBX1 | BTC      | EGFR | BTC_EGFR      |
| 5595 YBX1 | UBA52    | EGFR | UBA52_EGFR    |
| 5596 YBX1 | CAMP     | EGFR | CAMP_EGFR     |
| 5597 YBX1 | ANXA1    | EGFR | ANXA1_EGFR    |
| 5598 YBX1 | AREGB    | EGFR | AREGB_EGFR    |
| 5599 YBX1 | NRG4     | EGFR | NRG4_EGFR     |
| 5600 YBX1 | VCAN     | EGFR | VCAN_EGFR     |
| 5601 YBX1 | ICAM1    | EGFR | ICAM1_EGFR    |
| 5602 YBX1 | TNC      | EGFR | TNC_EGFR      |
| 5603 YBX1 | EREG     | EGFR | EREG_EGFR     |
| 5604 YBX1 | L1CAM    | EGFR | L1CAM_EGFR    |
| 5605 YBX1 | CALM3    | EGFR | CALM3_EGFR    |
| 5606 YBX1 | HSP90AA1 | EGFR | HSP90AA1_EGFR |
| 5607 YBX1 | AMH      | EGFR | AMH_EGFR      |
| 5608 YBX1 | CALM1    | EGFR | CALM1_EGFR    |
| 5609 YBX1 | VEGFA    | EGFR | VEGFA_EGFR    |
| 5610 YBX1 | SPINK1   | EGFR | SPINK1_EGFR   |
| 5611 YBX1 | FGF1     | EGFR | FGF1_EGFR     |
| 5612 YBX1 | AREG     | EGFR | AREG_EGFR     |
| 5613 YBX1 | FGF13    | EGFR | FGF13_EGFR    |
| 5614 YBX1 | TGFA     | EGFR | TGFA_EGFR     |
| 5615 YBX1 | HBEGF    | EGFR | HBEGF_EGFR    |
| 5616 YBX1 | EGF      | EGFR | EGF_EGFR      |
| 5617 YBX1 | ZP3      | EGFR | ZP3_EGFR      |
| 5618 YBX1 | BCAN     | EGFR | BCAN_EGFR     |
| 5619 YBX1 | EPGN     | EGFR | EPGN_EGFR     |
| 5620 YBX1 | DCN      | EGFR | DCN_EGFR      |
| 5621 YBX1 | EFEMP1   | EGFR | EFEMP1_EGFR   |
| 5622 EGR1 | FGL1     | EGFR | FGL1_EGFR     |
| 5623 EGR1 | GNAI2    | EGFR | GNAI2_EGFR    |
| 5624 EGR1 | CALM2    | EGFR | CALM2_EGFR    |
| 5625 EGR1 | CDH1     | EGFR | CDH1_EGFR     |

|      |       |          |      |               |
|------|-------|----------|------|---------------|
| 5626 | EGR1  | BTC      | EGFR | BTC_EGFR      |
| 5627 | EGR1  | UBA52    | EGFR | UBA52_EGFR    |
| 5628 | EGR1  | CAMP     | EGFR | CAMP_EGFR     |
| 5629 | EGR1  | ANXA1    | EGFR | ANXA1_EGFR    |
| 5630 | EGR1  | AREGB    | EGFR | AREGB_EGFR    |
| 5631 | EGR1  | NRG4     | EGFR | NRG4_EGFR     |
| 5632 | EGR1  | VCAN     | EGFR | VCAN_EGFR     |
| 5633 | EGR1  | ICAM1    | EGFR | ICAM1_EGFR    |
| 5634 | EGR1  | TNC      | EGFR | TNC_EGFR      |
| 5635 | EGR1  | EREG     | EGFR | EREG_EGFR     |
| 5636 | EGR1  | L1CAM    | EGFR | L1CAM_EGFR    |
| 5637 | EGR1  | CALM3    | EGFR | CALM3_EGFR    |
| 5638 | EGR1  | HSP90AA1 | EGFR | HSP90AA1_EGFR |
| 5639 | EGR1  | AMH      | EGFR | AMH_EGFR      |
| 5640 | EGR1  | CALM1    | EGFR | CALM1_EGFR    |
| 5641 | EGR1  | SPINK1   | EGFR | SPINK1_EGFR   |
| 5642 | EGR1  | FGF1     | EGFR | FGF1_EGFR     |
| 5643 | EGR1  | AREG     | EGFR | AREG_EGFR     |
| 5644 | EGR1  | FGF13    | EGFR | FGF13_EGFR    |
| 5645 | EGR1  | TGFA     | EGFR | TGFA_EGFR     |
| 5646 | EGR1  | HBEGF    | EGFR | HBEGF_EGFR    |
| 5647 | EGR1  | EGF      | EGFR | EGF_EGFR      |
| 5648 | EGR1  | ZP3      | EGFR | ZP3_EGFR      |
| 5649 | EGR1  | BCAN     | EGFR | BCAN_EGFR     |
| 5650 | EGR1  | EPGN     | EGFR | EPGN_EGFR     |
| 5651 | EGR1  | DCN      | EGFR | DCN_EGFR      |
| 5652 | EGR1  | EFEMP1   | EGFR | EFEMP1_EGFR   |
| 5653 | STAT3 | GNAI2    | EGFR | GNAI2_EGFR    |
| 5654 | STAT3 | CALM2    | EGFR | CALM2_EGFR    |
| 5655 | STAT3 | BTC      | EGFR | BTC_EGFR      |
| 5656 | STAT3 | UBA52    | EGFR | UBA52_EGFR    |
| 5657 | STAT3 | CAMP     | EGFR | CAMP_EGFR     |
| 5658 | STAT3 | ANXA1    | EGFR | ANXA1_EGFR    |
| 5659 | STAT3 | AREGB    | EGFR | AREGB_EGFR    |
| 5660 | STAT3 | NRG4     | EGFR | NRG4_EGFR     |
| 5661 | STAT3 | VCAN     | EGFR | VCAN_EGFR     |
| 5662 | STAT3 | TNC      | EGFR | TNC_EGFR      |
| 5663 | STAT3 | EREG     | EGFR | EREG_EGFR     |
| 5664 | STAT3 | L1CAM    | EGFR | L1CAM_EGFR    |
| 5665 | STAT3 | CALM3    | EGFR | CALM3_EGFR    |
| 5666 | STAT3 | HSP90AA1 | EGFR | HSP90AA1_EGFR |
| 5667 | STAT3 | AMH      | EGFR | AMH_EGFR      |
| 5668 | STAT3 | CALM1    | EGFR | CALM1_EGFR    |
| 5669 | STAT3 | SPINK1   | EGFR | SPINK1_EGFR   |
| 5670 | STAT3 | AREG     | EGFR | AREG_EGFR     |
| 5671 | STAT3 | FGF13    | EGFR | FGF13_EGFR    |
| 5672 | STAT3 | TGFA     | EGFR | TGFA_EGFR     |
| 5673 | STAT3 | HBEGF    | EGFR | HBEGF_EGFR    |
| 5674 | STAT3 | EGF      | EGFR | EGF_EGFR      |
| 5675 | STAT3 | ZP3      | EGFR | ZP3_EGFR      |
| 5676 | STAT3 | BCAN     | EGFR | BCAN_EGFR     |
| 5677 | STAT3 | EPGN     | EGFR | EPGN_EGFR     |
| 5678 | STAT3 | DCN      | EGFR | DCN_EGFR      |
| 5679 | STAT3 | EFEMP1   | EGFR | EFEMP1_EGFR   |
| 5680 | MTA1  | FGL1     | EGFR | FGL1_EGFR     |
| 5681 | MTA1  | GNAI2    | EGFR | GNAI2_EGFR    |
| 5682 | MTA1  | CALM2    | EGFR | CALM2_EGFR    |
| 5683 | MTA1  | BTC      | EGFR | BTC_EGFR      |

|      |      |          |      |               |
|------|------|----------|------|---------------|
| 5684 | MTA1 | UBA52    | EGFR | UBA52_EGFR    |
| 5685 | MTA1 | CAMP     | EGFR | CAMP_EGFR     |
| 5686 | MTA1 | ANXA1    | EGFR | ANXA1_EGFR    |
| 5687 | MTA1 | AREGB    | EGFR | AREGB_EGFR    |
| 5688 | MTA1 | NRG4     | EGFR | NRG4_EGFR     |
| 5689 | MTA1 | VCAN     | EGFR | VCAN_EGFR     |
| 5690 | MTA1 | ICAM1    | EGFR | ICAM1_EGFR    |
| 5691 | MTA1 | TNC      | EGFR | TNC_EGFR      |
| 5692 | MTA1 | EREG     | EGFR | EREG_EGFR     |
| 5693 | MTA1 | L1CAM    | EGFR | L1CAM_EGFR    |
| 5694 | MTA1 | CALM3    | EGFR | CALM3_EGFR    |
| 5695 | MTA1 | HSP90AA1 | EGFR | HSP90AA1_EGFR |
| 5696 | MTA1 | AMH      | EGFR | AMH_EGFR      |
| 5697 | MTA1 | CALM1    | EGFR | CALM1_EGFR    |
| 5698 | MTA1 | VEGFA    | EGFR | VEGFA_EGFR    |
| 5699 | MTA1 | SPINK1   | EGFR | SPINK1_EGFR   |
| 5700 | MTA1 | FGF1     | EGFR | FGF1_EGFR     |
| 5701 | MTA1 | AREG     | EGFR | AREG_EGFR     |
| 5702 | MTA1 | FGF13    | EGFR | FGF13_EGFR    |
| 5703 | MTA1 | TGFA     | EGFR | TGFA_EGFR     |
| 5704 | MTA1 | HBEGF    | EGFR | HBEGF_EGFR    |
| 5705 | MTA1 | EGF      | EGFR | EGF_EGFR      |
| 5706 | MTA1 | ZP3      | EGFR | ZP3_EGFR      |
| 5707 | MTA1 | BCAN     | EGFR | BCAN_EGFR     |
| 5708 | MTA1 | EPGN     | EGFR | EPGN_EGFR     |
| 5709 | MTA1 | DCN      | EGFR | DCN_EGFR      |
| 5710 | MTA1 | EFEMP1   | EGFR | EFEMP1_EGFR   |
| 5711 | SP1  | FGL1     | EGFR | FGL1_EGFR     |
| 5712 | SP1  | GNAI2    | EGFR | GNAI2_EGFR    |
| 5713 | SP1  | CALM2    | EGFR | CALM2_EGFR    |
| 5714 | SP1  | CDH1     | EGFR | CDH1_EGFR     |
| 5715 | SP1  | BTC      | EGFR | BTC_EGFR      |
| 5716 | SP1  | UBA52    | EGFR | UBA52_EGFR    |
| 5717 | SP1  | CAMP     | EGFR | CAMP_EGFR     |
| 5718 | SP1  | ANXA1    | EGFR | ANXA1_EGFR    |
| 5719 | SP1  | AREGB    | EGFR | AREGB_EGFR    |
| 5720 | SP1  | NRG4     | EGFR | NRG4_EGFR     |
| 5721 | SP1  | VCAN     | EGFR | VCAN_EGFR     |
| 5722 | SP1  | EREG     | EGFR | EREG_EGFR     |
| 5723 | SP1  | L1CAM    | EGFR | L1CAM_EGFR    |
| 5724 | SP1  | CALM3    | EGFR | CALM3_EGFR    |
| 5725 | SP1  | HSP90AA1 | EGFR | HSP90AA1_EGFR |
| 5726 | SP1  | AMH      | EGFR | AMH_EGFR      |
| 5727 | SP1  | CALM1    | EGFR | CALM1_EGFR    |
| 5728 | SP1  | SPINK1   | EGFR | SPINK1_EGFR   |
| 5729 | SP1  | FGF1     | EGFR | FGF1_EGFR     |
| 5730 | SP1  | FGF13    | EGFR | FGF13_EGFR    |
| 5731 | SP1  | ZP3      | EGFR | ZP3_EGFR      |
| 5732 | SP1  | BCAN     | EGFR | BCAN_EGFR     |
| 5733 | SP1  | EPGN     | EGFR | EPGN_EGFR     |
| 5734 | SP1  | DCN      | EGFR | DCN_EGFR      |
| 5735 | SP1  | EFEMP1   | EGFR | EFEMP1_EGFR   |
| 5736 | RELA | FGL1     | EGFR | FGL1_EGFR     |
| 5737 | RELA | GNAI2    | EGFR | GNAI2_EGFR    |
| 5738 | RELA | CALM2    | EGFR | CALM2_EGFR    |
| 5739 | RELA | BTC      | EGFR | BTC_EGFR      |
| 5740 | RELA | UBA52    | EGFR | UBA52_EGFR    |
| 5741 | RELA | CAMP     | EGFR | CAMP_EGFR     |

|      |       |          |      |               |
|------|-------|----------|------|---------------|
| 5742 | RELA  | ANXA1    | EGFR | ANXA1_EGFR    |
| 5743 | RELA  | AREGB    | EGFR | AREGB_EGFR    |
| 5744 | RELA  | NRG4     | EGFR | NRG4_EGFR     |
| 5745 | RELA  | VCAN     | EGFR | VCAN_EGFR     |
| 5746 | RELA  | EREG     | EGFR | EREG_EGFR     |
| 5747 | RELA  | L1CAM    | EGFR | L1CAM_EGFR    |
| 5748 | RELA  | CALM3    | EGFR | CALM3_EGFR    |
| 5749 | RELA  | HSP90AA1 | EGFR | HSP90AA1_EGFR |
| 5750 | RELA  | CALM1    | EGFR | CALM1_EGFR    |
| 5751 | RELA  | SPINK1   | EGFR | SPINK1_EGFR   |
| 5752 | RELA  | FGF1     | EGFR | FGF1_EGFR     |
| 5753 | RELA  | AREG     | EGFR | AREG_EGFR     |
| 5754 | RELA  | FGF13    | EGFR | FGF13_EGFR    |
| 5755 | RELA  | TGFA     | EGFR | TGFA_EGFR     |
| 5756 | RELA  | EGF      | EGFR | EGF_EGFR      |
| 5757 | RELA  | ZP3      | EGFR | ZP3_EGFR      |
| 5758 | RELA  | BCAN     | EGFR | BCAN_EGFR     |
| 5759 | RELA  | EPGN     | EGFR | EPGN_EGFR     |
| 5760 | RELA  | DCN      | EGFR | DCN_EGFR      |
| 5761 | RELA  | EFEMP1   | EGFR | EFEMP1_EGFR   |
| 5762 | PGR   | FGL1     | EGFR | FGL1_EGFR     |
| 5763 | PGR   | GNAI2    | EGFR | GNAI2_EGFR    |
| 5764 | PGR   | CALM2    | EGFR | CALM2_EGFR    |
| 5765 | PGR   | CDH1     | EGFR | CDH1_EGFR     |
| 5766 | PGR   | BTC      | EGFR | BTC_EGFR      |
| 5767 | PGR   | UBA52    | EGFR | UBA52_EGFR    |
| 5768 | PGR   | CAMP     | EGFR | CAMP_EGFR     |
| 5769 | PGR   | ANXA1    | EGFR | ANXA1_EGFR    |
| 5770 | PGR   | AREGB    | EGFR | AREGB_EGFR    |
| 5771 | PGR   | NRG4     | EGFR | NRG4_EGFR     |
| 5772 | PGR   | VCAN     | EGFR | VCAN_EGFR     |
| 5773 | PGR   | ICAM1    | EGFR | ICAM1_EGFR    |
| 5774 | PGR   | TNC      | EGFR | TNC_EGFR      |
| 5775 | PGR   | EREG     | EGFR | EREG_EGFR     |
| 5776 | PGR   | L1CAM    | EGFR | L1CAM_EGFR    |
| 5777 | PGR   | CALM3    | EGFR | CALM3_EGFR    |
| 5778 | PGR   | HSP90AA1 | EGFR | HSP90AA1_EGFR |
| 5779 | PGR   | AMH      | EGFR | AMH_EGFR      |
| 5780 | PGR   | CALM1    | EGFR | CALM1_EGFR    |
| 5781 | PGR   | SPINK1   | EGFR | SPINK1_EGFR   |
| 5782 | PGR   | FGF1     | EGFR | FGF1_EGFR     |
| 5783 | PGR   | AREG     | EGFR | AREG_EGFR     |
| 5784 | PGR   | FGF13    | EGFR | FGF13_EGFR    |
| 5785 | PGR   | TGFA     | EGFR | TGFA_EGFR     |
| 5786 | PGR   | HBEGF    | EGFR | HBEGF_EGFR    |
| 5787 | PGR   | EGF      | EGFR | EGF_EGFR      |
| 5788 | PGR   | ZP3      | EGFR | ZP3_EGFR      |
| 5789 | PGR   | BCAN     | EGFR | BCAN_EGFR     |
| 5790 | PGR   | EPGN     | EGFR | EPGN_EGFR     |
| 5791 | PGR   | DCN      | EGFR | DCN_EGFR      |
| 5792 | PGR   | EFEMP1   | EGFR | EFEMP1_EGFR   |
| 5793 | KLF10 | FGL1     | EGFR | FGL1_EGFR     |
| 5794 | KLF10 | GNAI2    | EGFR | GNAI2_EGFR    |
| 5795 | KLF10 | CALM2    | EGFR | CALM2_EGFR    |
| 5796 | KLF10 | CDH1     | EGFR | CDH1_EGFR     |
| 5797 | KLF10 | BTC      | EGFR | BTC_EGFR      |
| 5798 | KLF10 | UBA52    | EGFR | UBA52_EGFR    |
| 5799 | KLF10 | CAMP     | EGFR | CAMP_EGFR     |

|      |        |          |      |               |
|------|--------|----------|------|---------------|
| 5800 | KLF10  | ANXA1    | EGFR | ANXA1_EGFR    |
| 5801 | KLF10  | AREGB    | EGFR | AREGB_EGFR    |
| 5802 | KLF10  | NRG4     | EGFR | NRG4_EGFR     |
| 5803 | KLF10  | VCAN     | EGFR | VCAN_EGFR     |
| 5804 | KLF10  | ICAM1    | EGFR | ICAM1_EGFR    |
| 5805 | KLF10  | TNC      | EGFR | TNC_EGFR      |
| 5806 | KLF10  | EREG     | EGFR | EREG_EGFR     |
| 5807 | KLF10  | L1CAM    | EGFR | L1CAM_EGFR    |
| 5808 | KLF10  | CALM3    | EGFR | CALM3_EGFR    |
| 5809 | KLF10  | HSP90AA1 | EGFR | HSP90AA1_EGFR |
| 5810 | KLF10  | AMH      | EGFR | AMH_EGFR      |
| 5811 | KLF10  | CALM1    | EGFR | CALM1_EGFR    |
| 5812 | KLF10  | VEGFA    | EGFR | VEGFA_EGFR    |
| 5813 | KLF10  | SPINK1   | EGFR | SPINK1_EGFR   |
| 5814 | KLF10  | FGF1     | EGFR | FGF1_EGFR     |
| 5815 | KLF10  | AREG     | EGFR | AREG_EGFR     |
| 5816 | KLF10  | FGF13    | EGFR | FGF13_EGFR    |
| 5817 | KLF10  | TGFA     | EGFR | TGFA_EGFR     |
| 5818 | KLF10  | HBEGF    | EGFR | HBEGF_EGFR    |
| 5819 | KLF10  | EGF      | EGFR | EGF_EGFR      |
| 5820 | KLF10  | ZP3      | EGFR | ZP3_EGFR      |
| 5821 | KLF10  | BCAN     | EGFR | BCAN_EGFR     |
| 5822 | KLF10  | EPGN     | EGFR | EPGN_EGFR     |
| 5823 | KLF10  | DCN      | EGFR | DCN_EGFR      |
| 5824 | KLF10  | EFEMP1   | EGFR | EFEMP1_EGFR   |
| 5825 | CREBBP | FGL1     | EGFR | FGL1_EGFR     |
| 5826 | CREBBP | GNAI2    | EGFR | GNAI2_EGFR    |
| 5827 | CREBBP | CALM2    | EGFR | CALM2_EGFR    |
| 5828 | CREBBP | CDH1     | EGFR | CDH1_EGFR     |
| 5829 | CREBBP | BTC      | EGFR | BTC_EGFR      |
| 5830 | CREBBP | UBA52    | EGFR | UBA52_EGFR    |
| 5831 | CREBBP | CAMP     | EGFR | CAMP_EGFR     |
| 5832 | CREBBP | ANXA1    | EGFR | ANXA1_EGFR    |
| 5833 | CREBBP | AREGB    | EGFR | AREGB_EGFR    |
| 5834 | CREBBP | NRG4     | EGFR | NRG4_EGFR     |
| 5835 | CREBBP | VCAN     | EGFR | VCAN_EGFR     |
| 5836 | CREBBP | ICAM1    | EGFR | ICAM1_EGFR    |
| 5837 | CREBBP | TNC      | EGFR | TNC_EGFR      |
| 5838 | CREBBP | EREG     | EGFR | EREG_EGFR     |
| 5839 | CREBBP | L1CAM    | EGFR | L1CAM_EGFR    |
| 5840 | CREBBP | CALM3    | EGFR | CALM3_EGFR    |
| 5841 | CREBBP | HSP90AA1 | EGFR | HSP90AA1_EGFR |
| 5842 | CREBBP | AMH      | EGFR | AMH_EGFR      |
| 5843 | CREBBP | CALM1    | EGFR | CALM1_EGFR    |
| 5844 | CREBBP | VEGFA    | EGFR | VEGFA_EGFR    |
| 5845 | CREBBP | SPINK1   | EGFR | SPINK1_EGFR   |
| 5846 | CREBBP | FGF1     | EGFR | FGF1_EGFR     |
| 5847 | CREBBP | AREG     | EGFR | AREG_EGFR     |
| 5848 | CREBBP | FGF13    | EGFR | FGF13_EGFR    |
| 5849 | CREBBP | TGFA     | EGFR | TGFA_EGFR     |
| 5850 | CREBBP | HBEGF    | EGFR | HBEGF_EGFR    |
| 5851 | CREBBP | EGF      | EGFR | EGF_EGFR      |
| 5852 | CREBBP | ZP3      | EGFR | ZP3_EGFR      |
| 5853 | CREBBP | BCAN     | EGFR | BCAN_EGFR     |
| 5854 | CREBBP | EPGN     | EGFR | EPGN_EGFR     |
| 5855 | CREBBP | DCN      | EGFR | DCN_EGFR      |
| 5856 | CREBBP | EFEMP1   | EGFR | EFEMP1_EGFR   |
| 5857 | TP53   | FGL1     | EGFR | FGL1_EGFR     |

|      |       |          |      |               |
|------|-------|----------|------|---------------|
| 5858 | TP53  | GNAI2    | EGFR | GNAI2_EGFR    |
| 5859 | TP53  | CALM2    | EGFR | CALM2_EGFR    |
| 5860 | TP53  | CDH1     | EGFR | CDH1_EGFR     |
| 5861 | TP53  | BTC      | EGFR | BTC_EGFR      |
| 5862 | TP53  | UBA52    | EGFR | UBA52_EGFR    |
| 5863 | TP53  | CAMP     | EGFR | CAMP_EGFR     |
| 5864 | TP53  | ANXA1    | EGFR | ANXA1_EGFR    |
| 5865 | TP53  | AREGB    | EGFR | AREGB_EGFR    |
| 5866 | TP53  | NRG4     | EGFR | NRG4_EGFR     |
| 5867 | TP53  | ICAM1    | EGFR | ICAM1_EGFR    |
| 5868 | TP53  | TNC      | EGFR | TNC_EGFR      |
| 5869 | TP53  | EREG     | EGFR | EREG_EGFR     |
| 5870 | TP53  | L1CAM    | EGFR | L1CAM_EGFR    |
| 5871 | TP53  | CALM3    | EGFR | CALM3_EGFR    |
| 5872 | TP53  | HSP90AA1 | EGFR | HSP90AA1_EGFR |
| 5873 | TP53  | AMH      | EGFR | AMH_EGFR      |
| 5874 | TP53  | CALM1    | EGFR | CALM1_EGFR    |
| 5875 | TP53  | SPINK1   | EGFR | SPINK1_EGFR   |
| 5876 | TP53  | FGF1     | EGFR | FGF1_EGFR     |
| 5877 | TP53  | AREG     | EGFR | AREG_EGFR     |
| 5878 | TP53  | FGF13    | EGFR | FGF13_EGFR    |
| 5879 | TP53  | TGFA     | EGFR | TGFA_EGFR     |
| 5880 | TP53  | HBEGF    | EGFR | HBEGF_EGFR    |
| 5881 | TP53  | EGF      | EGFR | EGF_EGFR      |
| 5882 | TP53  | ZP3      | EGFR | ZP3_EGFR      |
| 5883 | TP53  | BCAN     | EGFR | BCAN_EGFR     |
| 5884 | TP53  | EPGN     | EGFR | EPGN_EGFR     |
| 5885 | TP53  | DCN      | EGFR | DCN_EGFR      |
| 5886 | TP53  | EFEMP1   | EGFR | EFEMP1_EGFR   |
| 5887 | NFKB1 | FGL1     | EGFR | FGL1_EGFR     |
| 5888 | NFKB1 | GNAI2    | EGFR | GNAI2_EGFR    |
| 5889 | NFKB1 | CALM2    | EGFR | CALM2_EGFR    |
| 5890 | NFKB1 | BTC      | EGFR | BTC_EGFR      |
| 5891 | NFKB1 | UBA52    | EGFR | UBA52_EGFR    |
| 5892 | NFKB1 | CAMP     | EGFR | CAMP_EGFR     |
| 5893 | NFKB1 | ANXA1    | EGFR | ANXA1_EGFR    |
| 5894 | NFKB1 | AREGB    | EGFR | AREGB_EGFR    |
| 5895 | NFKB1 | NRG4     | EGFR | NRG4_EGFR     |
| 5896 | NFKB1 | VCAN     | EGFR | VCAN_EGFR     |
| 5897 | NFKB1 | EREG     | EGFR | EREG_EGFR     |
| 5898 | NFKB1 | L1CAM    | EGFR | L1CAM_EGFR    |
| 5899 | NFKB1 | CALM3    | EGFR | CALM3_EGFR    |
| 5900 | NFKB1 | HSP90AA1 | EGFR | HSP90AA1_EGFR |
| 5901 | NFKB1 | CALM1    | EGFR | CALM1_EGFR    |
| 5902 | NFKB1 | SPINK1   | EGFR | SPINK1_EGFR   |
| 5903 | NFKB1 | FGF1     | EGFR | FGF1_EGFR     |
| 5904 | NFKB1 | AREG     | EGFR | AREG_EGFR     |
| 5905 | NFKB1 | FGF13    | EGFR | FGF13_EGFR    |
| 5906 | NFKB1 | TGFA     | EGFR | TGFA_EGFR     |
| 5907 | NFKB1 | EGF      | EGFR | EGF_EGFR      |
| 5908 | NFKB1 | ZP3      | EGFR | ZP3_EGFR      |
| 5909 | NFKB1 | BCAN     | EGFR | BCAN_EGFR     |
| 5910 | NFKB1 | EPGN     | EGFR | EPGN_EGFR     |
| 5911 | NFKB1 | DCN      | EGFR | DCN_EGFR      |
| 5912 | NFKB1 | EFEMP1   | EGFR | EFEMP1_EGFR   |
| 5913 | VDR   | FGL1     | EGFR | FGL1_EGFR     |
| 5914 | VDR   | GNAI2    | EGFR | GNAI2_EGFR    |
| 5915 | VDR   | CALM2    | EGFR | CALM2_EGFR    |

|            |          |      |               |
|------------|----------|------|---------------|
| 5916 VDR   | BTC      | EGFR | BTC_EGFR      |
| 5917 VDR   | UBA52    | EGFR | UBA52_EGFR    |
| 5918 VDR   | ANXA1    | EGFR | ANXA1_EGFR    |
| 5919 VDR   | AREGB    | EGFR | AREGB_EGFR    |
| 5920 VDR   | NRG4     | EGFR | NRG4_EGFR     |
| 5921 VDR   | VCAN     | EGFR | VCAN_EGFR     |
| 5922 VDR   | ICAM1    | EGFR | ICAM1_EGFR    |
| 5923 VDR   | TNC      | EGFR | TNC_EGFR      |
| 5924 VDR   | EREG     | EGFR | EREG_EGFR     |
| 5925 VDR   | L1CAM    | EGFR | L1CAM_EGFR    |
| 5926 VDR   | CALM3    | EGFR | CALM3_EGFR    |
| 5927 VDR   | HSP90AA1 | EGFR | HSP90AA1_EGFR |
| 5928 VDR   | CALM1    | EGFR | CALM1_EGFR    |
| 5929 VDR   | VEGFA    | EGFR | VEGFA_EGFR    |
| 5930 VDR   | SPINK1   | EGFR | SPINK1_EGFR   |
| 5931 VDR   | FGF1     | EGFR | FGF1_EGFR     |
| 5932 VDR   | AREG     | EGFR | AREG_EGFR     |
| 5933 VDR   | FGF13    | EGFR | FGF13_EGFR    |
| 5934 VDR   | TGFA     | EGFR | TGFA_EGFR     |
| 5935 VDR   | HBEGF    | EGFR | HBEGF_EGFR    |
| 5936 VDR   | EGF      | EGFR | EGF_EGFR      |
| 5937 VDR   | ZP3      | EGFR | ZP3_EGFR      |
| 5938 VDR   | BCAN     | EGFR | BCAN_EGFR     |
| 5939 VDR   | EPGN     | EGFR | EPGN_EGFR     |
| 5940 VDR   | DCN      | EGFR | DCN_EGFR      |
| 5941 VDR   | EFEMP1   | EGFR | EFEMP1_EGFR   |
| 5942 HDAC1 | FGL1     | EGFR | FGL1_EGFR     |
| 5943 HDAC1 | GNAI2    | EGFR | GNAI2_EGFR    |
| 5944 HDAC1 | CALM2    | EGFR | CALM2_EGFR    |
| 5945 HDAC1 | BTC      | EGFR | BTC_EGFR      |
| 5946 HDAC1 | UBA52    | EGFR | UBA52_EGFR    |
| 5947 HDAC1 | CAMP     | EGFR | CAMP_EGFR     |
| 5948 HDAC1 | ANXA1    | EGFR | ANXA1_EGFR    |
| 5949 HDAC1 | AREGB    | EGFR | AREGB_EGFR    |
| 5950 HDAC1 | NRG4     | EGFR | NRG4_EGFR     |
| 5951 HDAC1 | VCAN     | EGFR | VCAN_EGFR     |
| 5952 HDAC1 | TNC      | EGFR | TNC_EGFR      |
| 5953 HDAC1 | EREG     | EGFR | EREG_EGFR     |
| 5954 HDAC1 | L1CAM    | EGFR | L1CAM_EGFR    |
| 5955 HDAC1 | CALM3    | EGFR | CALM3_EGFR    |
| 5956 HDAC1 | HSP90AA1 | EGFR | HSP90AA1_EGFR |
| 5957 HDAC1 | AMH      | EGFR | AMH_EGFR      |
| 5958 HDAC1 | CALM1    | EGFR | CALM1_EGFR    |
| 5959 HDAC1 | VEGFA    | EGFR | VEGFA_EGFR    |
| 5960 HDAC1 | SPINK1   | EGFR | SPINK1_EGFR   |
| 5961 HDAC1 | FGF1     | EGFR | FGF1_EGFR     |
| 5962 HDAC1 | AREG     | EGFR | AREG_EGFR     |
| 5963 HDAC1 | FGF13    | EGFR | FGF13_EGFR    |
| 5964 HDAC1 | TGFA     | EGFR | TGFA_EGFR     |
| 5965 HDAC1 | HBEGF    | EGFR | HBEGF_EGFR    |
| 5966 HDAC1 | EGF      | EGFR | EGF_EGFR      |
| 5967 HDAC1 | ZP3      | EGFR | ZP3_EGFR      |
| 5968 HDAC1 | BCAN     | EGFR | BCAN_EGFR     |
| 5969 HDAC1 | EPGN     | EGFR | EPGN_EGFR     |
| 5970 HDAC1 | DCN      | EGFR | DCN_EGFR      |
| 5971 HDAC1 | EFEMP1   | EGFR | EFEMP1_EGFR   |
| 5972 WT1   | FGL1     | EGFR | FGL1_EGFR     |
| 5973 WT1   | GNAI2    | EGFR | GNAI2_EGFR    |

|              |          |      |               |
|--------------|----------|------|---------------|
| 5974 WT1     | CALM2    | EGFR | CALM2_EGFR    |
| 5975 WT1     | BTC      | EGFR | BTC_EGFR      |
| 5976 WT1     | UBA52    | EGFR | UBA52_EGFR    |
| 5977 WT1     | ANXA1    | EGFR | ANXA1_EGFR    |
| 5978 WT1     | AREGB    | EGFR | AREGB_EGFR    |
| 5979 WT1     | NRG4     | EGFR | NRG4_EGFR     |
| 5980 WT1     | VCAN     | EGFR | VCAN_EGFR     |
| 5981 WT1     | ICAM1    | EGFR | ICAM1_EGFR    |
| 5982 WT1     | TNC      | EGFR | TNC_EGFR      |
| 5983 WT1     | L1CAM    | EGFR | L1CAM_EGFR    |
| 5984 WT1     | CALM3    | EGFR | CALM3_EGFR    |
| 5985 WT1     | HSP90AA1 | EGFR | HSP90AA1_EGFR |
| 5986 WT1     | CALM1    | EGFR | CALM1_EGFR    |
| 5987 WT1     | SPINK1   | EGFR | SPINK1_EGFR   |
| 5988 WT1     | FGF1     | EGFR | FGF1_EGFR     |
| 5989 WT1     | AREG     | EGFR | AREG_EGFR     |
| 5990 WT1     | FGF13    | EGFR | FGF13_EGFR    |
| 5991 WT1     | TGFA     | EGFR | TGFA_EGFR     |
| 5992 WT1     | EGF      | EGFR | EGF_EGFR      |
| 5993 WT1     | ZP3      | EGFR | ZP3_EGFR      |
| 5994 WT1     | BCAN     | EGFR | BCAN_EGFR     |
| 5995 WT1     | EPGN     | EGFR | EPGN_EGFR     |
| 5996 WT1     | DCN      | EGFR | DCN_EGFR      |
| 5997 WT1     | EFEMP1   | EGFR | EFEMP1_EGFR   |
| 5998 TFAP2A  | FGL1     | EGFR | FGL1_EGFR     |
| 5999 TFAP2A  | GNAI2    | EGFR | GNAI2_EGFR    |
| 6000 TFAP2A  | CALM2    | EGFR | CALM2_EGFR    |
| 6001 TFAP2A  | BTC      | EGFR | BTC_EGFR      |
| 6002 TFAP2A  | UBA52    | EGFR | UBA52_EGFR    |
| 6003 TFAP2A  | CAMP     | EGFR | CAMP_EGFR     |
| 6004 TFAP2A  | ANXA1    | EGFR | ANXA1_EGFR    |
| 6005 TFAP2A  | AREGB    | EGFR | AREGB_EGFR    |
| 6006 TFAP2A  | NRG4     | EGFR | NRG4_EGFR     |
| 6007 TFAP2A  | VCAN     | EGFR | VCAN_EGFR     |
| 6008 TFAP2A  | ICAM1    | EGFR | ICAM1_EGFR    |
| 6009 TFAP2A  | TNC      | EGFR | TNC_EGFR      |
| 6010 TFAP2A  | EREG     | EGFR | EREG_EGFR     |
| 6011 TFAP2A  | CALM3    | EGFR | CALM3_EGFR    |
| 6012 TFAP2A  | HSP90AA1 | EGFR | HSP90AA1_EGFR |
| 6013 TFAP2A  | AMH      | EGFR | AMH_EGFR      |
| 6014 TFAP2A  | CALM1    | EGFR | CALM1_EGFR    |
| 6015 TFAP2A  | SPINK1   | EGFR | SPINK1_EGFR   |
| 6016 TFAP2A  | FGF1     | EGFR | FGF1_EGFR     |
| 6017 TFAP2A  | AREG     | EGFR | AREG_EGFR     |
| 6018 TFAP2A  | FGF13    | EGFR | FGF13_EGFR    |
| 6019 TFAP2A  | TGFA     | EGFR | TGFA_EGFR     |
| 6020 TFAP2A  | HBEGF    | EGFR | HBEGF_EGFR    |
| 6021 TFAP2A  | EGF      | EGFR | EGF_EGFR      |
| 6022 TFAP2A  | ZP3      | EGFR | ZP3_EGFR      |
| 6023 TFAP2A  | BCAN     | EGFR | BCAN_EGFR     |
| 6024 TFAP2A  | EPGN     | EGFR | EPGN_EGFR     |
| 6025 TFAP2A  | DCN      | EGFR | DCN_EGFR      |
| 6026 TFAP2A  | EFEMP1   | EGFR | EFEMP1_EGFR   |
| 6027 LRRFIP1 | FGL1     | EGFR | FGL1_EGFR     |
| 6028 LRRFIP1 | GNAI2    | EGFR | GNAI2_EGFR    |
| 6029 LRRFIP1 | CALM2    | EGFR | CALM2_EGFR    |
| 6030 LRRFIP1 | CDH1     | EGFR | CDH1_EGFR     |
| 6031 LRRFIP1 | BTC      | EGFR | BTC_EGFR      |



|      |         |          |      |               |
|------|---------|----------|------|---------------|
| 6032 | LRRFIP1 | UBA52    | EGFR | UBA52_EGFR    |
| 6033 | LRRFIP1 | CAMP     | EGFR | CAMP_EGFR     |
| 6034 | LRRFIP1 | ANXA1    | EGFR | ANXA1_EGFR    |
| 6035 | LRRFIP1 | AREGB    | EGFR | AREGB_EGFR    |
| 6036 | LRRFIP1 | NRG4     | EGFR | NRG4_EGFR     |
| 6037 | LRRFIP1 | VCAN     | EGFR | VCAN_EGFR     |
| 6038 | LRRFIP1 | ICAM1    | EGFR | ICAM1_EGFR    |
| 6039 | LRRFIP1 | TNC      | EGFR | TNC_EGFR      |
| 6040 | LRRFIP1 | EREG     | EGFR | EREG_EGFR     |
| 6041 | LRRFIP1 | L1CAM    | EGFR | L1CAM_EGFR    |
| 6042 | LRRFIP1 | CALM3    | EGFR | CALM3_EGFR    |
| 6043 | LRRFIP1 | HSP90AA1 | EGFR | HSP90AA1_EGFR |
| 6044 | LRRFIP1 | AMH      | EGFR | AMH_EGFR      |
| 6045 | LRRFIP1 | CALM1    | EGFR | CALM1_EGFR    |
| 6046 | LRRFIP1 | VEGFA    | EGFR | VEGFA_EGFR    |
| 6047 | LRRFIP1 | SPINK1   | EGFR | SPINK1_EGFR   |
| 6048 | LRRFIP1 | FGF1     | EGFR | FGF1_EGFR     |
| 6049 | LRRFIP1 | AREG     | EGFR | AREG_EGFR     |
| 6050 | LRRFIP1 | FGF13    | EGFR | FGF13_EGFR    |
| 6051 | LRRFIP1 | TGFA     | EGFR | TGFA_EGFR     |
| 6052 | LRRFIP1 | HBEGF    | EGFR | HBEGF_EGFR    |
| 6053 | LRRFIP1 | EGF      | EGFR | EGF_EGFR      |
| 6054 | LRRFIP1 | ZP3      | EGFR | ZP3_EGFR      |
| 6055 | LRRFIP1 | BCAN     | EGFR | BCAN_EGFR     |
| 6056 | LRRFIP1 | EPGN     | EGFR | EPGN_EGFR     |
| 6057 | LRRFIP1 | DCN      | EGFR | DCN_EGFR      |
| 6058 | LRRFIP1 | EFEMP1   | EGFR | EFEMP1_EGFR   |
| 6059 | NR3C2   | FGL1     | EGFR | FGL1_EGFR     |
| 6060 | NR3C2   | GNAI2    | EGFR | GNAI2_EGFR    |
| 6061 | NR3C2   | CALM2    | EGFR | CALM2_EGFR    |
| 6062 | NR3C2   | CDH1     | EGFR | CDH1_EGFR     |
| 6063 | NR3C2   | BTC      | EGFR | BTC_EGFR      |
| 6064 | NR3C2   | UBA52    | EGFR | UBA52_EGFR    |
| 6065 | NR3C2   | CAMP     | EGFR | CAMP_EGFR     |
| 6066 | NR3C2   | ANXA1    | EGFR | ANXA1_EGFR    |
| 6067 | NR3C2   | AREGB    | EGFR | AREGB_EGFR    |
| 6068 | NR3C2   | NRG4     | EGFR | NRG4_EGFR     |
| 6069 | NR3C2   | VCAN     | EGFR | VCAN_EGFR     |
| 6070 | NR3C2   | ICAM1    | EGFR | ICAM1_EGFR    |
| 6071 | NR3C2   | TNC      | EGFR | TNC_EGFR      |
| 6072 | NR3C2   | EREG     | EGFR | EREG_EGFR     |
| 6073 | NR3C2   | L1CAM    | EGFR | L1CAM_EGFR    |
| 6074 | NR3C2   | CALM3    | EGFR | CALM3_EGFR    |
| 6075 | NR3C2   | HSP90AA1 | EGFR | HSP90AA1_EGFR |
| 6076 | NR3C2   | AMH      | EGFR | AMH_EGFR      |
| 6077 | NR3C2   | CALM1    | EGFR | CALM1_EGFR    |
| 6078 | NR3C2   | VEGFA    | EGFR | VEGFA_EGFR    |
| 6079 | NR3C2   | SPINK1   | EGFR | SPINK1_EGFR   |
| 6080 | NR3C2   | FGF1     | EGFR | FGF1_EGFR     |
| 6081 | NR3C2   | AREG     | EGFR | AREG_EGFR     |
| 6082 | NR3C2   | FGF13    | EGFR | FGF13_EGFR    |
| 6083 | NR3C2   | TGFA     | EGFR | TGFA_EGFR     |
| 6084 | NR3C2   | HBEGF    | EGFR | HBEGF_EGFR    |
| 6085 | NR3C2   | EGF      | EGFR | EGF_EGFR      |
| 6086 | NR3C2   | ZP3      | EGFR | ZP3_EGFR      |
| 6087 | NR3C2   | BCAN     | EGFR | BCAN_EGFR     |
| 6088 | NR3C2   | EPGN     | EGFR | EPGN_EGFR     |
| 6089 | NR3C2   | DCN      | EGFR | DCN_EGFR      |

|            |          |      |               |
|------------|----------|------|---------------|
| 6090 NR3C2 | EFEMP1   | EGFR | EFEMP1_EGFR   |
| 6091 STAT1 | FGL1     | EGFR | FGL1_EGFR     |
| 6092 STAT1 | GNAI2    | EGFR | GNAI2_EGFR    |
| 6093 STAT1 | CALM2    | EGFR | CALM2_EGFR    |
| 6094 STAT1 | CDH1     | EGFR | CDH1_EGFR     |
| 6095 STAT1 | BTC      | EGFR | BTC_EGFR      |
| 6096 STAT1 | UBA52    | EGFR | UBA52_EGFR    |
| 6097 STAT1 | CAMP     | EGFR | CAMP_EGFR     |
| 6098 STAT1 | ANXA1    | EGFR | ANXA1_EGFR    |
| 6099 STAT1 | AREGB    | EGFR | AREGB_EGFR    |
| 6100 STAT1 | NRG4     | EGFR | NRG4_EGFR     |
| 6101 STAT1 | VCAN     | EGFR | VCAN_EGFR     |
| 6102 STAT1 | TNC      | EGFR | TNC_EGFR      |
| 6103 STAT1 | EREG     | EGFR | EREG_EGFR     |
| 6104 STAT1 | L1CAM    | EGFR | L1CAM_EGFR    |
| 6105 STAT1 | CALM3    | EGFR | CALM3_EGFR    |
| 6106 STAT1 | AMH      | EGFR | AMH_EGFR      |
| 6107 STAT1 | CALM1    | EGFR | CALM1_EGFR    |
| 6108 STAT1 | VEGFA    | EGFR | VEGFA_EGFR    |
| 6109 STAT1 | SPINK1   | EGFR | SPINK1_EGFR   |
| 6110 STAT1 | FGF1     | EGFR | FGF1_EGFR     |
| 6111 STAT1 | AREG     | EGFR | AREG_EGFR     |
| 6112 STAT1 | FGF13    | EGFR | FGF13_EGFR    |
| 6113 STAT1 | TGFA     | EGFR | TGFA_EGFR     |
| 6114 STAT1 | HBEGF    | EGFR | HBEGF_EGFR    |
| 6115 STAT1 | EGF      | EGFR | EGF_EGFR      |
| 6116 STAT1 | ZP3      | EGFR | ZP3_EGFR      |
| 6117 STAT1 | BCAN     | EGFR | BCAN_EGFR     |
| 6118 STAT1 | EPGN     | EGFR | EPGN_EGFR     |
| 6119 STAT1 | DCN      | EGFR | DCN_EGFR      |
| 6120 STAT1 | EFEMP1   | EGFR | EFEMP1_EGFR   |
| 6121 AR    | FGL1     | EGFR | FGL1_EGFR     |
| 6122 AR    | GNAI2    | EGFR | GNAI2_EGFR    |
| 6123 AR    | CALM2    | EGFR | CALM2_EGFR    |
| 6124 AR    | BTC      | EGFR | BTC_EGFR      |
| 6125 AR    | UBA52    | EGFR | UBA52_EGFR    |
| 6126 AR    | CAMP     | EGFR | CAMP_EGFR     |
| 6127 AR    | ANXA1    | EGFR | ANXA1_EGFR    |
| 6128 AR    | AREGB    | EGFR | AREGB_EGFR    |
| 6129 AR    | NRG4     | EGFR | NRG4_EGFR     |
| 6130 AR    | VCAN     | EGFR | VCAN_EGFR     |
| 6131 AR    | ICAM1    | EGFR | ICAM1_EGFR    |
| 6132 AR    | TNC      | EGFR | TNC_EGFR      |
| 6133 AR    | EREG     | EGFR | EREG_EGFR     |
| 6134 AR    | L1CAM    | EGFR | L1CAM_EGFR    |
| 6135 AR    | CALM3    | EGFR | CALM3_EGFR    |
| 6136 AR    | HSP90AA1 | EGFR | HSP90AA1_EGFR |
| 6137 AR    | AMH      | EGFR | AMH_EGFR      |
| 6138 AR    | CALM1    | EGFR | CALM1_EGFR    |
| 6139 AR    | SPINK1   | EGFR | SPINK1_EGFR   |
| 6140 AR    | FGF1     | EGFR | FGF1_EGFR     |
| 6141 AR    | AREG     | EGFR | AREG_EGFR     |
| 6142 AR    | FGF13    | EGFR | FGF13_EGFR    |
| 6143 AR    | HBEGF    | EGFR | HBEGF_EGFR    |
| 6144 AR    | EGF      | EGFR | EGF_EGFR      |
| 6145 AR    | ZP3      | EGFR | ZP3_EGFR      |
| 6146 AR    | BCAN     | EGFR | BCAN_EGFR     |
| 6147 AR    | EPGN     | EGFR | EPGN_EGFR     |

|            |          |      |               |
|------------|----------|------|---------------|
| 6148 AR    | DCN      | EGFR | DCN_EGFR      |
| 6149 AR    | EFEMP1   | EGFR | EFEMP1_EGFR   |
| 6150 PML   | FGL1     | EGFR | FGL1_EGFR     |
| 6151 PML   | GNAI2    | EGFR | GNAI2_EGFR    |
| 6152 PML   | CALM2    | EGFR | CALM2_EGFR    |
| 6153 PML   | CDH1     | EGFR | CDH1_EGFR     |
| 6154 PML   | BTC      | EGFR | BTC_EGFR      |
| 6155 PML   | UBA52    | EGFR | UBA52_EGFR    |
| 6156 PML   | CAMP     | EGFR | CAMP_EGFR     |
| 6157 PML   | ANXA1    | EGFR | ANXA1_EGFR    |
| 6158 PML   | AREGB    | EGFR | AREGB_EGFR    |
| 6159 PML   | NRG4     | EGFR | NRG4_EGFR     |
| 6160 PML   | VCAN     | EGFR | VCAN_EGFR     |
| 6161 PML   | ICAM1    | EGFR | ICAM1_EGFR    |
| 6162 PML   | TNC      | EGFR | TNC_EGFR      |
| 6163 PML   | EREG     | EGFR | EREG_EGFR     |
| 6164 PML   | L1CAM    | EGFR | L1CAM_EGFR    |
| 6165 PML   | CALM3    | EGFR | CALM3_EGFR    |
| 6166 PML   | HSP90AA1 | EGFR | HSP90AA1_EGFR |
| 6167 PML   | AMH      | EGFR | AMH_EGFR      |
| 6168 PML   | CALM1    | EGFR | CALM1_EGFR    |
| 6169 PML   | VEGFA    | EGFR | VEGFA_EGFR    |
| 6170 PML   | SPINK1   | EGFR | SPINK1_EGFR   |
| 6171 PML   | FGF1     | EGFR | FGF1_EGFR     |
| 6172 PML   | AREG     | EGFR | AREG_EGFR     |
| 6173 PML   | FGF13    | EGFR | FGF13_EGFR    |
| 6174 PML   | TGFA     | EGFR | TGFA_EGFR     |
| 6175 PML   | HBEGF    | EGFR | HBEGF_EGFR    |
| 6176 PML   | EGF      | EGFR | EGF_EGFR      |
| 6177 PML   | ZP3      | EGFR | ZP3_EGFR      |
| 6178 PML   | BCAN     | EGFR | BCAN_EGFR     |
| 6179 PML   | EPGN     | EGFR | EPGN_EGFR     |
| 6180 PML   | DCN      | EGFR | DCN_EGFR      |
| 6181 PML   | EFEMP1   | EGFR | EFEMP1_EGFR   |
| 6182 HDAC3 | FGL1     | EGFR | FGL1_EGFR     |
| 6183 HDAC3 | GNAI2    | EGFR | GNAI2_EGFR    |
| 6184 HDAC3 | CALM2    | EGFR | CALM2_EGFR    |
| 6185 HDAC3 | BTC      | EGFR | BTC_EGFR      |
| 6186 HDAC3 | UBA52    | EGFR | UBA52_EGFR    |
| 6187 HDAC3 | CAMP     | EGFR | CAMP_EGFR     |
| 6188 HDAC3 | ANXA1    | EGFR | ANXA1_EGFR    |
| 6189 HDAC3 | AREGB    | EGFR | AREGB_EGFR    |
| 6190 HDAC3 | NRG4     | EGFR | NRG4_EGFR     |
| 6191 HDAC3 | VCAN     | EGFR | VCAN_EGFR     |
| 6192 HDAC3 | ICAM1    | EGFR | ICAM1_EGFR    |
| 6193 HDAC3 | TNC      | EGFR | TNC_EGFR      |
| 6194 HDAC3 | EREG     | EGFR | EREG_EGFR     |
| 6195 HDAC3 | L1CAM    | EGFR | L1CAM_EGFR    |
| 6196 HDAC3 | CALM3    | EGFR | CALM3_EGFR    |
| 6197 HDAC3 | HSP90AA1 | EGFR | HSP90AA1_EGFR |
| 6198 HDAC3 | AMH      | EGFR | AMH_EGFR      |
| 6199 HDAC3 | CALM1    | EGFR | CALM1_EGFR    |
| 6200 HDAC3 | SPINK1   | EGFR | SPINK1_EGFR   |
| 6201 HDAC3 | FGF1     | EGFR | FGF1_EGFR     |
| 6202 HDAC3 | AREG     | EGFR | AREG_EGFR     |
| 6203 HDAC3 | FGF13    | EGFR | FGF13_EGFR    |
| 6204 HDAC3 | TGFA     | EGFR | TGFA_EGFR     |
| 6205 HDAC3 | HBEGF    | EGFR | HBEGF_EGFR    |

|      |       |          |      |               |
|------|-------|----------|------|---------------|
| 6206 | HDAC3 | EGF      | EGFR | EGF_EGFR      |
| 6207 | HDAC3 | ZP3      | EGFR | ZP3_EGFR      |
| 6208 | HDAC3 | BCAN     | EGFR | BCAN_EGFR     |
| 6209 | HDAC3 | EPGN     | EGFR | EPGN_EGFR     |
| 6210 | HDAC3 | DCN      | EGFR | DCN_EGFR      |
| 6211 | HDAC3 | EFEMP1   | EGFR | EFEMP1_EGFR   |
| 6212 | PPARG | FGL1     | EGFR | FGL1_EGFR     |
| 6213 | PPARG | GNAI2    | EGFR | GNAI2_EGFR    |
| 6214 | PPARG | CALM2    | EGFR | CALM2_EGFR    |
| 6215 | PPARG | CDH1     | EGFR | CDH1_EGFR     |
| 6216 | PPARG | BTC      | EGFR | BTC_EGFR      |
| 6217 | PPARG | UBA52    | EGFR | UBA52_EGFR    |
| 6218 | PPARG | CAMP     | EGFR | CAMP_EGFR     |
| 6219 | PPARG | ANXA1    | EGFR | ANXA1_EGFR    |
| 6220 | PPARG | AREGB    | EGFR | AREGB_EGFR    |
| 6221 | PPARG | NRG4     | EGFR | NRG4_EGFR     |
| 6222 | PPARG | VCAN     | EGFR | VCAN_EGFR     |
| 6223 | PPARG | TNC      | EGFR | TNC_EGFR      |
| 6224 | PPARG | EREG     | EGFR | EREG_EGFR     |
| 6225 | PPARG | L1CAM    | EGFR | L1CAM_EGFR    |
| 6226 | PPARG | CALM3    | EGFR | CALM3_EGFR    |
| 6227 | PPARG | HSP90AA1 | EGFR | HSP90AA1_EGFR |
| 6228 | PPARG | AMH      | EGFR | AMH_EGFR      |
| 6229 | PPARG | CALM1    | EGFR | CALM1_EGFR    |
| 6230 | PPARG | VEGFA    | EGFR | VEGFA_EGFR    |
| 6231 | PPARG | SPINK1   | EGFR | SPINK1_EGFR   |
| 6232 | PPARG | AREG     | EGFR | AREG_EGFR     |
| 6233 | PPARG | FGF13    | EGFR | FGF13_EGFR    |
| 6234 | PPARG | TGFA     | EGFR | TGFA_EGFR     |
| 6235 | PPARG | HBEGF    | EGFR | HBEGF_EGFR    |
| 6236 | PPARG | EGF      | EGFR | EGF_EGFR      |
| 6237 | PPARG | ZP3      | EGFR | ZP3_EGFR      |
| 6238 | PPARG | BCAN     | EGFR | BCAN_EGFR     |
| 6239 | PPARG | EPGN     | EGFR | EPGN_EGFR     |
| 6240 | PPARG | DCN      | EGFR | DCN_EGFR      |
| 6241 | PPARG | EFEMP1   | EGFR | EFEMP1_EGFR   |
| 6242 | JUN   | FGL1     | EGFR | FGL1_EGFR     |
| 6243 | JUN   | GNAI2    | EGFR | GNAI2_EGFR    |
| 6244 | JUN   | CALM2    | EGFR | CALM2_EGFR    |
| 6245 | JUN   | CDH1     | EGFR | CDH1_EGFR     |
| 6246 | JUN   | BTC      | EGFR | BTC_EGFR      |
| 6247 | JUN   | UBA52    | EGFR | UBA52_EGFR    |
| 6248 | JUN   | CAMP     | EGFR | CAMP_EGFR     |
| 6249 | JUN   | ANXA1    | EGFR | ANXA1_EGFR    |
| 6250 | JUN   | AREGB    | EGFR | AREGB_EGFR    |
| 6251 | JUN   | NRG4     | EGFR | NRG4_EGFR     |
| 6252 | JUN   | VCAN     | EGFR | VCAN_EGFR     |
| 6253 | JUN   | ICAM1    | EGFR | ICAM1_EGFR    |
| 6254 | JUN   | EREG     | EGFR | EREG_EGFR     |
| 6255 | JUN   | L1CAM    | EGFR | L1CAM_EGFR    |
| 6256 | JUN   | CALM3    | EGFR | CALM3_EGFR    |
| 6257 | JUN   | HSP90AA1 | EGFR | HSP90AA1_EGFR |
| 6258 | JUN   | AMH      | EGFR | AMH_EGFR      |
| 6259 | JUN   | CALM1    | EGFR | CALM1_EGFR    |
| 6260 | JUN   | SPINK1   | EGFR | SPINK1_EGFR   |
| 6261 | JUN   | FGF1     | EGFR | FGF1_EGFR     |
| 6262 | JUN   | AREG     | EGFR | AREG_EGFR     |
| 6263 | JUN   | FGF13    | EGFR | FGF13_EGFR    |

|             |         |       |               |
|-------------|---------|-------|---------------|
| 6264 JUN    | TGFA    | EGFR  | TGFA_EGFR     |
| 6265 JUN    | HBEGF   | EGFR  | HBEGF_EGFR    |
| 6266 JUN    | EGF     | EGFR  | EGF_EGFR      |
| 6267 JUN    | ZP3     | EGFR  | ZP3_EGFR      |
| 6268 JUN    | BCAN    | EGFR  | BCAN_EGFR     |
| 6269 JUN    | EPGN    | EGFR  | EPGN_EGFR     |
| 6270 JUN    | EFEMP1  | EGFR  | EFEMP1_EGFR   |
| 6271 MTA1   | EFNA1   | EPHA2 | EFNA1_EPHA2   |
| 6272 TP53   | EFNA1   | EPHA2 | EFNA1_EPHA2   |
| 6273 HIC1   | EFNA1   | EPHA2 | EFNA1_EPHA2   |
| 6274 AES    | EFNA1   | EPHA3 | EFNA1_EPHA3   |
| 6275 REL    | VEGFA   | EPHB2 | VEGFA_EPHB2   |
| 6276 BTF3   | VEGFA   | EPHB2 | VEGFA_EPHB2   |
| 6277 NFKB1  | NUCB2   | ERAP1 | NUCB2_ERAP1   |
| 6278 RELA   | NUCB2   | ERAP1 | NUCB2_ERAP1   |
| 6279 PURA   | HLA-A   | ERBB2 | HLA-A_ERBB2   |
| 6280 PURA   | UBA52   | ERBB2 | UBA52_ERBB2   |
| 6281 PURA   | HBEGF   | ERBB2 | HBEGF_ERBB2   |
| 6282 PURA   | HSP90B1 | ERBB2 | HSP90B1_ERBB2 |
| 6283 PURA   | EREG    | ERBB2 | EREG_ERBB2    |
| 6284 EP300  | HLA-A   | ERBB2 | HLA-A_ERBB2   |
| 6285 EP300  | UBA52   | ERBB2 | UBA52_ERBB2   |
| 6286 EP300  | HBEGF   | ERBB2 | HBEGF_ERBB2   |
| 6287 EP300  | HSP90B1 | ERBB2 | HSP90B1_ERBB2 |
| 6288 EP300  | EREG    | ERBB2 | EREG_ERBB2    |
| 6289 GATA4  | HLA-A   | ERBB2 | HLA-A_ERBB2   |
| 6290 GATA4  | UBA52   | ERBB2 | UBA52_ERBB2   |
| 6291 GATA4  | HBEGF   | ERBB2 | HBEGF_ERBB2   |
| 6292 GATA4  | HSP90B1 | ERBB2 | HSP90B1_ERBB2 |
| 6293 GATA4  | EREG    | ERBB2 | EREG_ERBB2    |
| 6294 VDR    | HLA-A   | ERBB2 | HLA-A_ERBB2   |
| 6295 VDR    | UBA52   | ERBB2 | UBA52_ERBB2   |
| 6296 VDR    | HBEGF   | ERBB2 | HBEGF_ERBB2   |
| 6297 VDR    | HSP90B1 | ERBB2 | HSP90B1_ERBB2 |
| 6298 VDR    | EREG    | ERBB2 | EREG_ERBB2    |
| 6299 TFAP2C | HLA-A   | ERBB2 | HLA-A_ERBB2   |
| 6300 TFAP2C | UBA52   | ERBB2 | UBA52_ERBB2   |
| 6301 TFAP2C | HBEGF   | ERBB2 | HBEGF_ERBB2   |
| 6302 TFAP2C | HSP90B1 | ERBB2 | HSP90B1_ERBB2 |
| 6303 TFAP2C | EREG    | ERBB2 | EREG_ERBB2    |
| 6304 GABPA  | HLA-A   | ERBB2 | HLA-A_ERBB2   |
| 6305 GABPA  | UBA52   | ERBB2 | UBA52_ERBB2   |
| 6306 GABPA  | HBEGF   | ERBB2 | HBEGF_ERBB2   |
| 6307 GABPA  | HSP90B1 | ERBB2 | HSP90B1_ERBB2 |
| 6308 GABPA  | EREG    | ERBB2 | EREG_ERBB2    |
| 6309 YBX1   | HLA-A   | ERBB2 | HLA-A_ERBB2   |
| 6310 YBX1   | UBA52   | ERBB2 | UBA52_ERBB2   |
| 6311 YBX1   | HBEGF   | ERBB2 | HBEGF_ERBB2   |
| 6312 YBX1   | HSP90B1 | ERBB2 | HSP90B1_ERBB2 |
| 6313 YBX1   | EREG    | ERBB2 | EREG_ERBB2    |
| 6314 ETV4   | HLA-A   | ERBB2 | HLA-A_ERBB2   |
| 6315 ETV4   | UBA52   | ERBB2 | UBA52_ERBB2   |
| 6316 ETV4   | HBEGF   | ERBB2 | HBEGF_ERBB2   |
| 6317 ETV4   | HSP90B1 | ERBB2 | HSP90B1_ERBB2 |
| 6318 ETV4   | EREG    | ERBB2 | EREG_ERBB2    |
| 6319 SP4    | HLA-A   | ERBB2 | HLA-A_ERBB2   |
| 6320 SP4    | UBA52   | ERBB2 | UBA52_ERBB2   |
| 6321 SP4    | HBEGF   | ERBB2 | HBEGF_ERBB2   |

|      |       |         |       |               |
|------|-------|---------|-------|---------------|
| 6322 | SP4   | HSP90B1 | ERBB2 | HSP90B1_ERBB2 |
| 6323 | SP4   | EREG    | ERBB2 | EREG_ERBB2    |
| 6324 | CREB1 | HLA-A   | ERBB2 | HLA-A_ERBB2   |
| 6325 | CREB1 | UBA52   | ERBB2 | UBA52_ERBB2   |
| 6326 | CREB1 | HBEGF   | ERBB2 | HBEGF_ERBB2   |
| 6327 | CREB1 | HSP90B1 | ERBB2 | HSP90B1_ERBB2 |
| 6328 | CREB1 | EREG    | ERBB2 | EREG_ERBB2    |
| 6329 | AR    | HLA-A   | ERBB2 | HLA-A_ERBB2   |
| 6330 | AR    | UBA52   | ERBB2 | UBA52_ERBB2   |
| 6331 | AR    | HBEGF   | ERBB2 | HBEGF_ERBB2   |
| 6332 | AR    | HSP90B1 | ERBB2 | HSP90B1_ERBB2 |
| 6333 | AR    | EREG    | ERBB2 | EREG_ERBB2    |
| 6334 | PAX2  | HLA-A   | ERBB2 | HLA-A_ERBB2   |
| 6335 | PAX2  | UBA52   | ERBB2 | UBA52_ERBB2   |
| 6336 | PAX2  | HBEGF   | ERBB2 | HBEGF_ERBB2   |
| 6337 | PAX2  | HSP90B1 | ERBB2 | HSP90B1_ERBB2 |
| 6338 | PAX2  | EREG    | ERBB2 | EREG_ERBB2    |
| 6339 | FOXP3 | HLA-A   | ERBB2 | HLA-A_ERBB2   |
| 6340 | FOXP3 | UBA52   | ERBB2 | UBA52_ERBB2   |
| 6341 | FOXP3 | HBEGF   | ERBB2 | HBEGF_ERBB2   |
| 6342 | FOXP3 | HSP90B1 | ERBB2 | HSP90B1_ERBB2 |
| 6343 | FOXP3 | EREG    | ERBB2 | EREG_ERBB2    |
| 6344 | ATF7  | HLA-A   | ERBB2 | HLA-A_ERBB2   |
| 6345 | ATF7  | UBA52   | ERBB2 | UBA52_ERBB2   |
| 6346 | ATF7  | HBEGF   | ERBB2 | HBEGF_ERBB2   |
| 6347 | ATF7  | HSP90B1 | ERBB2 | HSP90B1_ERBB2 |
| 6348 | ATF7  | EREG    | ERBB2 | EREG_ERBB2    |
| 6349 | SP3   | HLA-A   | ERBB2 | HLA-A_ERBB2   |
| 6350 | SP3   | UBA52   | ERBB2 | UBA52_ERBB2   |
| 6351 | SP3   | HSP90B1 | ERBB2 | HSP90B1_ERBB2 |
| 6352 | SP3   | EREG    | ERBB2 | EREG_ERBB2    |
| 6353 | YY1   | HLA-A   | ERBB2 | HLA-A_ERBB2   |
| 6354 | YY1   | UBA52   | ERBB2 | UBA52_ERBB2   |
| 6355 | YY1   | HBEGF   | ERBB2 | HBEGF_ERBB2   |
| 6356 | YY1   | HSP90B1 | ERBB2 | HSP90B1_ERBB2 |
| 6357 | YY1   | EREG    | ERBB2 | EREG_ERBB2    |
| 6358 | XRCC5 | HLA-A   | ERBB2 | HLA-A_ERBB2   |
| 6359 | XRCC5 | UBA52   | ERBB2 | UBA52_ERBB2   |
| 6360 | XRCC5 | HBEGF   | ERBB2 | HBEGF_ERBB2   |
| 6361 | XRCC5 | HSP90B1 | ERBB2 | HSP90B1_ERBB2 |
| 6362 | XRCC5 | EREG    | ERBB2 | EREG_ERBB2    |
| 6363 | SP1   | HLA-A   | ERBB2 | HLA-A_ERBB2   |
| 6364 | SP1   | UBA52   | ERBB2 | UBA52_ERBB2   |
| 6365 | SP1   | HSP90B1 | ERBB2 | HSP90B1_ERBB2 |
| 6366 | SP1   | EREG    | ERBB2 | EREG_ERBB2    |
| 6367 | ATF1  | HLA-A   | ERBB2 | HLA-A_ERBB2   |
| 6368 | ATF1  | UBA52   | ERBB2 | UBA52_ERBB2   |
| 6369 | ATF1  | HBEGF   | ERBB2 | HBEGF_ERBB2   |
| 6370 | ATF1  | HSP90B1 | ERBB2 | HSP90B1_ERBB2 |
| 6371 | ATF1  | EREG    | ERBB2 | EREG_ERBB2    |
| 6372 | ELK1  | HLA-A   | ERBB2 | HLA-A_ERBB2   |
| 6373 | ELK1  | UBA52   | ERBB2 | UBA52_ERBB2   |
| 6374 | ELK1  | HBEGF   | ERBB2 | HBEGF_ERBB2   |
| 6375 | ELK1  | HSP90B1 | ERBB2 | HSP90B1_ERBB2 |
| 6376 | ELK1  | EREG    | ERBB2 | EREG_ERBB2    |
| 6377 | PGR   | HLA-A   | ERBB2 | HLA-A_ERBB2   |
| 6378 | PGR   | UBA52   | ERBB2 | UBA52_ERBB2   |
| 6379 | PGR   | HBEGF   | ERBB2 | HBEGF_ERBB2   |

|      |         |         |       |               |
|------|---------|---------|-------|---------------|
| 6380 | PGR     | HSP90B1 | ERBB2 | HSP90B1_ERBB2 |
| 6381 | PGR     | EREG    | ERBB2 | EREG_ERBB2    |
| 6382 | MYB     | HLA-A   | ERBB2 | HLA-A_ERBB2   |
| 6383 | MYB     | UBA52   | ERBB2 | UBA52_ERBB2   |
| 6384 | MYB     | HBEGF   | ERBB2 | HBEGF_ERBB2   |
| 6385 | MYB     | HSP90B1 | ERBB2 | HSP90B1_ERBB2 |
| 6386 | MYB     | EREG    | ERBB2 | EREG_ERBB2    |
| 6387 | ELF1    | HLA-A   | ERBB2 | HLA-A_ERBB2   |
| 6388 | ELF1    | UBA52   | ERBB2 | UBA52_ERBB2   |
| 6389 | ELF1    | HBEGF   | ERBB2 | HBEGF_ERBB2   |
| 6390 | ELF1    | HSP90B1 | ERBB2 | HSP90B1_ERBB2 |
| 6391 | ELF1    | EREG    | ERBB2 | EREG_ERBB2    |
| 6392 | DENND4A | HLA-A   | ERBB2 | HLA-A_ERBB2   |
| 6393 | DENND4A | UBA52   | ERBB2 | UBA52_ERBB2   |
| 6394 | DENND4A | HBEGF   | ERBB2 | HBEGF_ERBB2   |
| 6395 | DENND4A | HSP90B1 | ERBB2 | HSP90B1_ERBB2 |
| 6396 | DENND4A | EREG    | ERBB2 | EREG_ERBB2    |
| 6397 | JUND    | HLA-A   | ERBB2 | HLA-A_ERBB2   |
| 6398 | JUND    | UBA52   | ERBB2 | UBA52_ERBB2   |
| 6399 | JUND    | HBEGF   | ERBB2 | HBEGF_ERBB2   |
| 6400 | JUND    | HSP90B1 | ERBB2 | HSP90B1_ERBB2 |
| 6401 | JUND    | EREG    | ERBB2 | EREG_ERBB2    |
| 6402 | TFAP2A  | HLA-A   | ERBB2 | HLA-A_ERBB2   |
| 6403 | TFAP2A  | UBA52   | ERBB2 | UBA52_ERBB2   |
| 6404 | TFAP2A  | HBEGF   | ERBB2 | HBEGF_ERBB2   |
| 6405 | TFAP2A  | HSP90B1 | ERBB2 | HSP90B1_ERBB2 |
| 6406 | TFAP2A  | EREG    | ERBB2 | EREG_ERBB2    |
| 6407 | TFAP2B  | HLA-A   | ERBB2 | HLA-A_ERBB2   |
| 6408 | TFAP2B  | UBA52   | ERBB2 | UBA52_ERBB2   |
| 6409 | TFAP2B  | HBEGF   | ERBB2 | HBEGF_ERBB2   |
| 6410 | TFAP2B  | HSP90B1 | ERBB2 | HSP90B1_ERBB2 |
| 6411 | TFAP2B  | EREG    | ERBB2 | EREG_ERBB2    |
| 6412 | XRCC6   | HLA-A   | ERBB2 | HLA-A_ERBB2   |
| 6413 | XRCC6   | UBA52   | ERBB2 | UBA52_ERBB2   |
| 6414 | XRCC6   | HBEGF   | ERBB2 | HBEGF_ERBB2   |
| 6415 | XRCC6   | HSP90B1 | ERBB2 | HSP90B1_ERBB2 |
| 6416 | XRCC6   | EREG    | ERBB2 | EREG_ERBB2    |
| 6417 | NCOA3   | HLA-A   | ERBB2 | HLA-A_ERBB2   |
| 6418 | NCOA3   | UBA52   | ERBB2 | UBA52_ERBB2   |
| 6419 | NCOA3   | HBEGF   | ERBB2 | HBEGF_ERBB2   |
| 6420 | NCOA3   | HSP90B1 | ERBB2 | HSP90B1_ERBB2 |
| 6421 | NCOA3   | EREG    | ERBB2 | EREG_ERBB2    |
| 6422 | AR      | NRG1    | ERBB3 | NRG1_ERBB3    |
| 6423 | AR      | AREGB   | ERBB3 | AREGB_ERBB3   |
| 6424 | AR      | L1CAM   | ERBB3 | L1CAM_ERBB3   |
| 6425 | AR      | NRG2    | ERBB3 | NRG2_ERBB3    |
| 6426 | AR      | EREG    | ERBB3 | EREG_ERBB3    |
| 6427 | AR      | BTC     | ERBB3 | BTC_ERBB3     |
| 6428 | AR      | AREG    | ERBB3 | AREG_ERBB3    |
| 6429 | AR      | EGF     | ERBB3 | EGF_ERBB3     |
| 6430 | TWIST1  | NRG1    | ERBB3 | NRG1_ERBB3    |
| 6431 | TWIST1  | TGFA    | ERBB3 | TGFA_ERBB3    |
| 6432 | TWIST1  | AREGB   | ERBB3 | AREGB_ERBB3   |
| 6433 | TWIST1  | L1CAM   | ERBB3 | L1CAM_ERBB3   |
| 6434 | TWIST1  | NRG2    | ERBB3 | NRG2_ERBB3    |
| 6435 | TWIST1  | EREG    | ERBB3 | EREG_ERBB3    |
| 6436 | TWIST1  | BTC     | ERBB3 | BTC_ERBB3     |
| 6437 | TWIST1  | AREG    | ERBB3 | AREG_ERBB3    |

|      |        |       |       |             |
|------|--------|-------|-------|-------------|
| 6438 | TWIST1 | EGF   | ERBB3 | EGF_ERBB3   |
| 6439 | YBX1   | NRG1  | ERBB3 | NRG1_ERBB3  |
| 6440 | YBX1   | TGFA  | ERBB3 | TGFA_ERBB3  |
| 6441 | YBX1   | AREGB | ERBB3 | AREGB_ERBB3 |
| 6442 | YBX1   | L1CAM | ERBB3 | L1CAM_ERBB3 |
| 6443 | YBX1   | NRG2  | ERBB3 | NRG2_ERBB3  |
| 6444 | YBX1   | EREG  | ERBB3 | EREG_ERBB3  |
| 6445 | YBX1   | BTC   | ERBB3 | BTC_ERBB3   |
| 6446 | YBX1   | AREG  | ERBB3 | AREG_ERBB3  |
| 6447 | YBX1   | EGF   | ERBB3 | EGF_ERBB3   |
| 6448 | TWIST2 | NRG1  | ERBB3 | NRG1_ERBB3  |
| 6449 | TWIST2 | TGFA  | ERBB3 | TGFA_ERBB3  |
| 6450 | TWIST2 | AREGB | ERBB3 | AREGB_ERBB3 |
| 6451 | TWIST2 | L1CAM | ERBB3 | L1CAM_ERBB3 |
| 6452 | TWIST2 | NRG2  | ERBB3 | NRG2_ERBB3  |
| 6453 | TWIST2 | EREG  | ERBB3 | EREG_ERBB3  |
| 6454 | TWIST2 | BTC   | ERBB3 | BTC_ERBB3   |
| 6455 | TWIST2 | AREG  | ERBB3 | AREG_ERBB3  |
| 6456 | TWIST2 | EGF   | ERBB3 | EGF_ERBB3   |
| 6457 | WWP1   | HBEGF | ERBB4 | HBEGF_ERBB4 |
| 6458 | WWP1   | MMP7  | ERBB4 | MMP7_ERBB4  |
| 6459 | WWP1   | EREG  | ERBB4 | EREG_ERBB4  |
| 6460 | STAT3  | GNAI2 | F2R   | GNAI2_F2R   |
| 6461 | SP1    | GNAI2 | F2R   | GNAI2_F2R   |
| 6462 | SP3    | GNAI2 | F2R   | GNAI2_F2R   |
| 6463 | TFAP2A | GNAI2 | F2R   | GNAI2_F2R   |
| 6464 | TWIST2 | GNAI2 | F2R   | GNAI2_F2R   |
| 6465 | TWIST1 | GNAI2 | F2R   | GNAI2_F2R   |
| 6466 | JUN    | TFPI  | F3    | TFPI_F3     |
| 6467 | JUND   | TFPI  | F3    | TFPI_F3     |
| 6468 | SP1    | TFPI  | F3    | TFPI_F3     |
| 6469 | EGR1   | TFPI  | F3    | TFPI_F3     |
| 6470 | REL    | TFPI  | F3    | TFPI_F3     |
| 6471 | NFKB1  | TFPI  | F3    | TFPI_F3     |
| 6472 | RELA   | TFPI  | F3    | TFPI_F3     |
| 6473 | GLI2   | CALM1 | FAS   | CALM1_FAS   |
| 6474 | GLI2   | FASLG | FAS   | FASLG_FAS   |
| 6475 | NFKB1  | CALM1 | FAS   | CALM1_FAS   |
| 6476 | RELA   | CALM1 | FAS   | CALM1_FAS   |
| 6477 | SP1    | CALM1 | FAS   | CALM1_FAS   |
| 6478 | PURA   | CALM1 | FAS   | CALM1_FAS   |
| 6479 | PURA   | FASLG | FAS   | FASLG_FAS   |
| 6480 | TP53   | CALM1 | FAS   | CALM1_FAS   |
| 6481 | TP53   | FASLG | FAS   | FASLG_FAS   |
| 6482 | JUN    | CALM1 | FAS   | CALM1_FAS   |
| 6483 | STAT1  | CALM1 | FAS   | CALM1_FAS   |
| 6484 | STAT1  | FASLG | FAS   | FASLG_FAS   |
| 6485 | SREBF1 | CALM1 | FAS   | CALM1_FAS   |
| 6486 | SREBF1 | FASLG | FAS   | FASLG_FAS   |
| 6487 | NFYC   | CALM1 | FAS   | CALM1_FAS   |
| 6488 | NFYC   | FASLG | FAS   | FASLG_FAS   |
| 6489 | GLI1   | CALM1 | FAS   | CALM1_FAS   |
| 6490 | GLI1   | FASLG | FAS   | FASLG_FAS   |
| 6491 | YY1    | CALM1 | FAS   | CALM1_FAS   |
| 6492 | YY1    | FASLG | FAS   | FASLG_FAS   |
| 6493 | HDGF   | CALM1 | FAS   | CALM1_FAS   |
| 6494 | HDGF   | FASLG | FAS   | FASLG_FAS   |
| 6495 | NFKBIA | CALM1 | FAS   | CALM1_FAS   |



|      |        |          |        |                |
|------|--------|----------|--------|----------------|
| 6496 | NFKBIA | FASLG    | FAS    | FASLG_FAS      |
| 6497 | SREBF2 | CALM1    | FAS    | CALM1_FAS      |
| 6498 | SREBF2 | FASLG    | FAS    | FASLG_FAS      |
| 6499 | NFYB   | CALM1    | FAS    | CALM1_FAS      |
| 6500 | NFYB   | FASLG    | FAS    | FASLG_FAS      |
| 6501 | YBX1   | CALM1    | FAS    | CALM1_FAS      |
| 6502 | YBX1   | FASLG    | FAS    | FASLG_FAS      |
| 6503 | NFYA   | CALM1    | FAS    | CALM1_FAS      |
| 6504 | NFYA   | FASLG    | FAS    | FASLG_FAS      |
| 6505 | ATM    | CALM1    | FAS    | CALM1_FAS      |
| 6506 | ATM    | FASLG    | FAS    | FASLG_FAS      |
| 6507 | STAT3  | CALM1    | FAS    | CALM1_FAS      |
| 6508 | STAT3  | FASLG    | FAS    | FASLG_FAS      |
| 6509 | TFAP2A | CALM1    | FAS    | CALM1_FAS      |
| 6510 | TFAP2A | FASLG    | FAS    | FASLG_FAS      |
| 6511 | FOS    | CALM1    | FAS    | CALM1_FAS      |
| 6512 | FOS    | FASLG    | FAS    | FASLG_FAS      |
| 6513 | ATF2   | CALM1    | FAS    | CALM1_FAS      |
| 6514 | EGR1   | CALM1    | FAS    | CALM1_FAS      |
| 6515 | USF1   | ITIH2    | FCER1A | ITIH2_FCER1A   |
| 6516 | GATA2  | ITIH2    | FCER1A | ITIH2_FCER1A   |
| 6517 | SPI1   | ITIH2    | FCER1A | ITIH2_FCER1A   |
| 6518 | YY1    | ITIH2    | FCER1A | ITIH2_FCER1A   |
| 6519 | GATA1  | ITIH2    | FCER1A | ITIH2_FCER1A   |
| 6520 | USF2   | ITIH2    | FCER1A | ITIH2_FCER1A   |
| 6521 | ELF1   | ITIH2    | FCER1A | ITIH2_FCER1A   |
| 6522 | SPI1   | HRG      | FCGR1A | HRG_FCGR1A     |
| 6523 | STAT1  | HRG      | FCGR1A | HRG_FCGR1A     |
| 6524 | SP3    | HSP90AA1 | FGFR3  | HSP90AA1_FGFR3 |
| 6525 | SHOX   | HSP90AA1 | FGFR3  | HSP90AA1_FGFR3 |
| 6526 | SP4    | HSP90AA1 | FGFR3  | HSP90AA1_FGFR3 |
| 6527 | SP1    | HSP90AA1 | FGFR3  | HSP90AA1_FGFR3 |
| 6528 | ETS1   | VEGFA    | FLT1   | VEGFA_FLT1     |
| 6529 | CREB1  | VEGFA    | FLT1   | VEGFA_FLT1     |
| 6530 | ATF1   | VEGFA    | FLT1   | VEGFA_FLT1     |
| 6531 | NR5A1  | UBA52    | FSHR   | UBA52_FSHR     |
| 6532 | E2F5   | UBA52    | FSHR   | UBA52_FSHR     |
| 6533 | E2F1   | UBA52    | FSHR   | UBA52_FSHR     |
| 6534 | MTA2   | UBA52    | FSHR   | UBA52_FSHR     |
| 6535 | ECD    | GNAS     | GCGR   | GNAS_GCGR      |
| 6536 | ETS1   | CALM2    | GP6    | CALM2_GP6      |
| 6537 | ETS1   | CALM1    | GP6    | CALM1_GP6      |
| 6538 | ETS1   | CALM3    | GP6    | CALM3_GP6      |
| 6539 | FLI1   | CALM2    | GP6    | CALM2_GP6      |
| 6540 | FLI1   | CALM1    | GP6    | CALM1_GP6      |
| 6541 | FLI1   | CALM3    | GP6    | CALM3_GP6      |
| 6542 | GATA1  | CALM2    | GP6    | CALM2_GP6      |
| 6543 | GATA1  | CALM1    | GP6    | CALM1_GP6      |
| 6544 | GATA1  | CALM3    | GP6    | CALM3_GP6      |
| 6545 | PARP1  | B2M      | HFE    | B2M_HFE        |
| 6546 | MYC    | CALR     | HLA-F  | CALR_HLA-F     |
| 6547 | MYC    | B2M      | HLA-F  | B2M_HLA-F      |
| 6548 | MYCN   | CALR     | HLA-F  | CALR_HLA-F     |
| 6549 | MYCN   | B2M      | HLA-F  | B2M_HLA-F      |
| 6550 | RELA   | CALR     | HLA-F  | CALR_HLA-F     |
| 6551 | RELA   | B2M      | HLA-F  | B2M_HLA-F      |
| 6552 | NFKB1  | CALR     | HLA-F  | CALR_HLA-F     |
| 6553 | HIVEP2 | CALR     | HLA-F  | CALR_HLA-F     |

|      |        |       |         |               |
|------|--------|-------|---------|---------------|
| 6554 | HIVEP2 | B2M   | HLA-F   | B2M_HLA-F     |
| 6555 | CIITA  | CALR  | HLA-F   | CALR_HLA-F    |
| 6556 | CIITA  | B2M   | HLA-F   | B2M_HLA-F     |
| 6557 | AR     | HAS2  | HMMR    | HAS2_HMMR     |
| 6558 | AR     | CALM1 | HMMR    | CALM1_HMMR    |
| 6559 | STAT5A | HDC   | HRH1    | HDC_HRH1      |
| 6560 | NR3C1  | HDC   | HRH1    | HDC_HRH1      |
| 6561 | MYB    | HDC   | HRH1    | HDC_HRH1      |
| 6562 | SP1    | IFNG  | IFNGR1  | IFNG_IFNGR1   |
| 6563 | IRF2   | IFNG  | IFNGR1  | IFNG_IFNGR1   |
| 6564 | VHL    | GNAI2 | IGF1R   | GNAI2_IGF1R   |
| 6565 | KLF6   | GNAI2 | IGF1R   | GNAI2_IGF1R   |
| 6566 | WT1    | GNAI2 | IGF1R   | GNAI2_IGF1R   |
| 6567 | AR     | GNAI2 | IGF1R   | GNAI2_IGF1R   |
| 6568 | BRCA1  | GNAI2 | IGF1R   | GNAI2_IGF1R   |
| 6569 | SP1    | GNAI2 | IGF1R   | GNAI2_IGF1R   |
| 6570 | TP53   | GNAI2 | IGF1R   | GNAI2_IGF1R   |
| 6571 | ATM    | GNAI2 | IGF1R   | GNAI2_IGF1R   |
| 6572 | NKX3-1 | GNAI2 | IGF1R   | GNAI2_IGF1R   |
| 6573 | USF2   | GZMB  | IGF2R   | GZMB_IGF2R    |
| 6574 | GATA3  | IL12A | IL12RB2 | IL12A_IL12RB2 |
| 6575 | STAT6  | IL1B  | IL1R1   | IL1B_IL1R1    |
| 6576 | GLI1   | IL1RN | IL1R2   | IL1RN_IL1R2   |
| 6577 | GLI1   | IL1A  | IL1R2   | IL1A_IL1R2    |
| 6578 | GLI1   | IL1B  | IL1R2   | IL1B_IL1R2    |
| 6579 | RELA   | IL15  | IL2RA   | IL15_IL2RA    |
| 6580 | REL    | IL15  | IL2RA   | IL15_IL2RA    |
| 6581 | STAT4  | IL2   | IL2RA   | IL2_IL2RA     |
| 6582 | STAT4  | IL15  | IL2RA   | IL15_IL2RA    |
| 6583 | STAT4  | ICAM1 | IL2RA   | ICAM1_IL2RA   |
| 6584 | STAT1  | IL2   | IL2RA   | IL2_IL2RA     |
| 6585 | STAT1  | IL15  | IL2RA   | IL15_IL2RA    |
| 6586 | STAT3  | IL15  | IL2RA   | IL15_IL2RA    |
| 6587 | RXRA   | IL2   | IL2RA   | IL2_IL2RA     |
| 6588 | RXRA   | IL15  | IL2RA   | IL15_IL2RA    |
| 6589 | RXRA   | ICAM1 | IL2RA   | ICAM1_IL2RA   |
| 6590 | POU2F1 | IL15  | IL2RA   | IL15_IL2RA    |
| 6591 | POU2F1 | ICAM1 | IL2RA   | ICAM1_IL2RA   |
| 6592 | NFKB1  | IL15  | IL2RA   | IL15_IL2RA    |
| 6593 | FOXP3  | IL15  | IL2RA   | IL15_IL2RA    |
| 6594 | FOXP3  | ICAM1 | IL2RA   | ICAM1_IL2RA   |
| 6595 | SATB1  | IL15  | IL2RA   | IL15_IL2RA    |
| 6596 | SATB1  | ICAM1 | IL2RA   | ICAM1_IL2RA   |
| 6597 | MSC    | IL2   | IL2RA   | IL2_IL2RA     |
| 6598 | MSC    | IL15  | IL2RA   | IL15_IL2RA    |
| 6599 | MSC    | ICAM1 | IL2RA   | ICAM1_IL2RA   |
| 6600 | WT1    | IL15  | IL2RB   | IL15_IL2RB    |
| 6601 | WT1    | IL2   | IL2RB   | IL2_IL2RB     |
| 6602 | RXRA   | IL15  | IL2RB   | IL15_IL2RB    |
| 6603 | RXRA   | IL2   | IL2RB   | IL2_IL2RB     |
| 6604 | ETS1   | IL15  | IL2RB   | IL15_IL2RB    |
| 6605 | EGR1   | IL15  | IL2RB   | IL15_IL2RB    |
| 6606 | SP1    | IL15  | IL2RB   | IL15_IL2RB    |
| 6607 | RXRA   | IL9   | IL2RG   | IL9_IL2RG     |
| 6608 | RXRA   | IL21  | IL2RG   | IL21_IL2RG    |
| 6609 | RXRA   | IL15  | IL2RG   | IL15_IL2RG    |
| 6610 | RXRA   | IL4   | IL2RG   | IL4_IL2RG     |
| 6611 | RXRA   | IL2   | IL2RG   | IL2_IL2RG     |

|            |        |       |             |
|------------|--------|-------|-------------|
| 6612 RXRA  | IL7    | IL2RG | IL7_IL2RG   |
| 6613 RXRA  | ICAM1  | IL2RG | ICAM1_IL2RG |
| 6614 RXRA  | IL13   | IL2RG | IL13_IL2RG  |
| 6615 TCF3  | IL5    | IL5RA | IL5_IL5RA   |
| 6616 RFX1  | IL5    | IL5RA | IL5_IL5RA   |
| 6617 RFX3  | IL5    | IL5RA | IL5_IL5RA   |
| 6618 CREM  | IL5    | IL5RA | IL5_IL5RA   |
| 6619 JUN   | IL5    | IL5RA | IL5_IL5RA   |
| 6620 CREB1 | IL5    | IL5RA | IL5_IL5RA   |
| 6621 RFX2  | IL5    | IL5RA | IL5_IL5RA   |
| 6622 SP1   | CALM3  | INSR  | CALM3_INSR  |
| 6623 SP1   | IGF1   | INSR  | IGF1_INSR   |
| 6624 SP1   | CALM1  | INSR  | CALM1_INSR  |
| 6625 SP1   | AHSG   | INSR  | AHSG_INSR   |
| 6626 SP1   | SORBS1 | INSR  | SORBS1_INSR |
| 6627 SP1   | CALM2  | INSR  | CALM2_INSR  |
| 6628 SP1   | INS    | INSR  | INS_INSR    |
| 6629 SP1   | ARF1   | INSR  | ARF1_INSR   |
| 6630 SP1   | NAMPT  | INSR  | NAMPT_INSR  |
| 6631 SP1   | GIP    | INSR  | GIP_INSR    |
| 6632 HMGA1 | CALM3  | INSR  | CALM3_INSR  |
| 6633 HMGA1 | HRAS   | INSR  | HRAS_INSR   |
| 6634 HMGA1 | IGF1   | INSR  | IGF1_INSR   |
| 6635 HMGA1 | CALM1  | INSR  | CALM1_INSR  |
| 6636 HMGA1 | IGF2   | INSR  | IGF2_INSR   |
| 6637 HMGA1 | AHSG   | INSR  | AHSG_INSR   |
| 6638 HMGA1 | SORBS1 | INSR  | SORBS1_INSR |
| 6639 HMGA1 | CALM2  | INSR  | CALM2_INSR  |
| 6640 HMGA1 | INS    | INSR  | INS_INSR    |
| 6641 HMGA1 | ARF1   | INSR  | ARF1_INSR   |
| 6642 HMGA1 | NAMPT  | INSR  | NAMPT_INSR  |
| 6643 HMGA1 | GIP    | INSR  | GIP_INSR    |
| 6644 CEBPB | CALM3  | INSR  | CALM3_INSR  |
| 6645 CEBPB | HRAS   | INSR  | HRAS_INSR   |
| 6646 CEBPB | IGF1   | INSR  | IGF1_INSR   |
| 6647 CEBPB | CALM1  | INSR  | CALM1_INSR  |
| 6648 CEBPB | IGF2   | INSR  | IGF2_INSR   |
| 6649 CEBPB | AHSG   | INSR  | AHSG_INSR   |
| 6650 CEBPB | SORBS1 | INSR  | SORBS1_INSR |
| 6651 CEBPB | CALM2  | INSR  | CALM2_INSR  |
| 6652 CEBPB | INS    | INSR  | INS_INSR    |
| 6653 CEBPB | ARF1   | INSR  | ARF1_INSR   |
| 6654 CEBPB | NAMPT  | INSR  | NAMPT_INSR  |
| 6655 CEBPB | GIP    | INSR  | GIP_INSR    |
| 6656 ESR2  | CALM3  | INSR  | CALM3_INSR  |
| 6657 ESR2  | HRAS   | INSR  | HRAS_INSR   |
| 6658 ESR2  | IGF1   | INSR  | IGF1_INSR   |
| 6659 ESR2  | CALM1  | INSR  | CALM1_INSR  |
| 6660 ESR2  | IGF2   | INSR  | IGF2_INSR   |
| 6661 ESR2  | AHSG   | INSR  | AHSG_INSR   |
| 6662 ESR2  | SORBS1 | INSR  | SORBS1_INSR |
| 6663 ESR2  | CALM2  | INSR  | CALM2_INSR  |
| 6664 ESR2  | INS    | INSR  | INS_INSR    |
| 6665 ESR2  | ARF1   | INSR  | ARF1_INSR   |
| 6666 ESR2  | NAMPT  | INSR  | NAMPT_INSR  |
| 6667 ESR2  | GIP    | INSR  | GIP_INSR    |
| 6668 CEBPA | CALM3  | INSR  | CALM3_INSR  |
| 6669 CEBPA | HRAS   | INSR  | HRAS_INSR   |

|      |        |        |        |              |
|------|--------|--------|--------|--------------|
| 6670 | CEBPA  | CALM1  | INSR   | CALM1_INSR   |
| 6671 | CEBPA  | AHSG   | INSR   | AHSG_INSR    |
| 6672 | CEBPA  | SORBS1 | INSR   | SORBS1_INSR  |
| 6673 | CEBPA  | CALM2  | INSR   | CALM2_INSR   |
| 6674 | CEBPA  | INS    | INSR   | INS_INSR     |
| 6675 | CEBPA  | ARF1   | INSR   | ARF1_INSR    |
| 6676 | CEBPA  | NAMPT  | INSR   | NAMPT_INSR   |
| 6677 | CEBPA  | GIP    | INSR   | GIP_INSR     |
| 6678 | SP3    | COL4A4 | ITGA2  | COL4A4_ITGA2 |
| 6679 | SP3    | FN1    | ITGA2  | FN1_ITGA2    |
| 6680 | SP1    | COL4A4 | ITGA2  | COL4A4_ITGA2 |
| 6681 | SP1    | FN1    | ITGA2  | FN1_ITGA2    |
| 6682 | STAT6  | CALR   | ITGA2B | CALR_ITGA2B  |
| 6683 | STAT6  | THBS1  | ITGA2B | THBS1_ITGA2B |
| 6684 | STAT6  | FN1    | ITGA2B | FN1_ITGA2B   |
| 6685 | SPI1   | CALR   | ITGA2B | CALR_ITGA2B  |
| 6686 | SPI1   | THBS1  | ITGA2B | THBS1_ITGA2B |
| 6687 | SPI1   | FN1    | ITGA2B | FN1_ITGA2B   |
| 6688 | RUNX1  | CALR   | ITGA2B | CALR_ITGA2B  |
| 6689 | RUNX1  | THBS1  | ITGA2B | THBS1_ITGA2B |
| 6690 | RUNX1  | FN1    | ITGA2B | FN1_ITGA2B   |
| 6691 | FLI1   | CALR   | ITGA2B | CALR_ITGA2B  |
| 6692 | FLI1   | THBS1  | ITGA2B | THBS1_ITGA2B |
| 6693 | FLI1   | FN1    | ITGA2B | FN1_ITGA2B   |
| 6694 | GATA1  | CALR   | ITGA2B | CALR_ITGA2B  |
| 6695 | GATA1  | THBS1  | ITGA2B | THBS1_ITGA2B |
| 6696 | GATA1  | FN1    | ITGA2B | FN1_ITGA2B   |
| 6697 | SP1    | FN1    | ITGA5  | FN1_ITGA5    |
| 6698 | NFIC   | SPP1   | ITGA5  | SPP1_ITGA5   |
| 6699 | NFIC   | FN1    | ITGA5  | FN1_ITGA5    |
| 6700 | PAX6   | SPP1   | ITGA5  | SPP1_ITGA5   |
| 6701 | PAX6   | FN1    | ITGA5  | FN1_ITGA5    |
| 6702 | HOXD3  | SPP1   | ITGA5  | SPP1_ITGA5   |
| 6703 | HOXD3  | FN1    | ITGA5  | FN1_ITGA5    |
| 6704 | ZEB2   | SPP1   | ITGA5  | SPP1_ITGA5   |
| 6705 | ZEB2   | FN1    | ITGA5  | FN1_ITGA5    |
| 6706 | POU5F1 | FN1    | ITGA6  | FN1_ITGA6    |
| 6707 | POU5F1 | THBS1  | ITGA6  | THBS1_ITGA6  |
| 6708 | SOX2   | FN1    | ITGA6  | FN1_ITGA6    |
| 6709 | SOX2   | THBS1  | ITGA6  | THBS1_ITGA6  |
| 6710 | TBX5   | VEGFA  | ITGA9  | VEGFA_ITGA9  |
| 6711 | TBX5   | TGM2   | ITGA9  | TGM2_ITGA9   |
| 6712 | TBX5   | SPP1   | ITGA9  | SPP1_ITGA9   |
| 6713 | TBX5   | VCAM1  | ITGA9  | VCAM1_ITGA9  |
| 6714 | TBX5   | FN1    | ITGA9  | FN1_ITGA9    |
| 6715 | MEIS1  | VEGFA  | ITGA9  | VEGFA_ITGA9  |
| 6716 | MEIS1  | TGM2   | ITGA9  | TGM2_ITGA9   |
| 6717 | MEIS1  | SPP1   | ITGA9  | SPP1_ITGA9   |
| 6718 | MEIS1  | VCAM1  | ITGA9  | VCAM1_ITGA9  |
| 6719 | MEIS1  | FN1    | ITGA9  | FN1_ITGA9    |
| 6720 | KLF10  | ICAM3  | ITGAD  | ICAM3_ITGAD  |
| 6721 | KLF10  | VCAM1  | ITGAD  | VCAM1_ITGAD  |
| 6722 | SP1    | ICAM3  | ITGAD  | ICAM3_ITGAD  |
| 6723 | SP1    | VCAM1  | ITGAD  | VCAM1_ITGAD  |
| 6724 | SP3    | ICAM3  | ITGAD  | ICAM3_ITGAD  |
| 6725 | SP3    | VCAM1  | ITGAD  | VCAM1_ITGAD  |
| 6726 | RFX1   | ICAM3  | ITGAL  | ICAM3_ITGAL  |
| 6727 | RFX1   | ICAM5  | ITGAL  | ICAM5_ITGAL  |

|            |        |       |              |
|------------|--------|-------|--------------|
| 6728 RFX1  | ICAM2  | ITGAL | ICAM2_ITGAL  |
| 6729 RFX1  | ICAM4  | ITGAL | ICAM4_ITGAL  |
| 6730 RFX1  | ICAM1  | ITGAL | ICAM1_ITGAL  |
| 6731 RFX1  | LYZ    | ITGAL | LYZ_ITGAL    |
| 6732 SPI1  | F10    | ITGAM | F10_ITGAM    |
| 6733 SPI1  | ICAM1  | ITGAM | ICAM1_ITGAM  |
| 6734 SPI1  | ICAM2  | ITGAM | ICAM2_ITGAM  |
| 6735 SPI1  | PLAU   | ITGAM | PLAU_ITGAM   |
| 6736 SPI1  | FGB    | ITGAM | FGB_ITGAM    |
| 6737 SPI1  | LPA    | ITGAM | LPA_ITGAM    |
| 6738 SPI1  | APOB   | ITGAM | APOB_ITGAM   |
| 6739 SPI1  | MMP9   | ITGAM | MMP9_ITGAM   |
| 6740 SPI1  | HP     | ITGAM | HP_ITGAM     |
| 6741 SPI1  | CD40LG | ITGAM | CD40LG_ITGAM |
| 6742 SPI1  | SELPLG | ITGAM | SELPLG_ITGAM |
| 6743 SPI1  | CYR61  | ITGAM | CYR61_ITGAM  |
| 6744 SPI1  | PLAT   | ITGAM | PLAT_ITGAM   |
| 6745 SPI1  | C3     | ITGAM | C3_ITGAM     |
| 6746 SPI1  | PLG    | ITGAM | PLG_ITGAM    |
| 6747 SPI1  | FGA    | ITGAM | FGA_ITGAM    |
| 6748 SPI1  | CFH    | ITGAM | CFH_ITGAM    |
| 6749 SPI1  | SPON2  | ITGAM | SPON2_ITGAM  |
| 6750 SPI1  | ICAM4  | ITGAM | ICAM4_ITGAM  |
| 6751 SPI1  | KNG1   | ITGAM | KNG1_ITGAM   |
| 6752 SPI1  | CTGF   | ITGAM | CTGF_ITGAM   |
| 6753 SPI1  | PROC   | ITGAM | PROC_ITGAM   |
| 6754 SP3   | CALR   | ITGAV | CALR_ITGAV   |
| 6755 SP3   | COL4A4 | ITGAV | COL4A4_ITGAV |
| 6756 SP3   | SPP1   | ITGAV | SPP1_ITGAV   |
| 6757 SP3   | FN1    | ITGAV | FN1_ITGAV    |
| 6758 HOXD3 | CALR   | ITGAV | CALR_ITGAV   |
| 6759 HOXD3 | COL4A4 | ITGAV | COL4A4_ITGAV |
| 6760 HOXD3 | VEGFA  | ITGAV | VEGFA_ITGAV  |
| 6761 HOXD3 | SPP1   | ITGAV | SPP1_ITGAV   |
| 6762 HOXD3 | FN1    | ITGAV | FN1_ITGAV    |
| 6763 SP1   | CALR   | ITGAV | CALR_ITGAV   |
| 6764 SP1   | COL4A4 | ITGAV | COL4A4_ITGAV |
| 6765 SP1   | FN1    | ITGAV | FN1_ITGAV    |
| 6766 JUND  | CALR   | ITGAV | CALR_ITGAV   |
| 6767 JUND  | COL4A4 | ITGAV | COL4A4_ITGAV |
| 6768 JUND  | VEGFA  | ITGAV | VEGFA_ITGAV  |
| 6769 JUND  | SPP1   | ITGAV | SPP1_ITGAV   |
| 6770 JUND  | FN1    | ITGAV | FN1_ITGAV    |
| 6771 FOSL1 | CALR   | ITGAV | CALR_ITGAV   |
| 6772 FOSL1 | COL4A4 | ITGAV | COL4A4_ITGAV |
| 6773 FOSL1 | VEGFA  | ITGAV | VEGFA_ITGAV  |
| 6774 FOSL1 | SPP1   | ITGAV | SPP1_ITGAV   |
| 6775 FOSL1 | FN1    | ITGAV | FN1_ITGAV    |
| 6776 SPI1  | ICAM1  | ITGAX | ICAM1_ITGAX  |
| 6777 SPI1  | C3     | ITGAX | C3_ITGAX     |
| 6778 SPI1  | FGA    | ITGAX | FGA_ITGAX    |
| 6779 WT1   | ICAM1  | ITGAX | ICAM1_ITGAX  |
| 6780 WT1   | C3     | ITGAX | C3_ITGAX     |
| 6781 WT1   | FGA    | ITGAX | FGA_ITGAX    |
| 6782 NFKB1 | C3     | ITGAX | C3_ITGAX     |
| 6783 NFKB1 | FGA    | ITGAX | FGA_ITGAX    |
| 6784 RELA  | C3     | ITGAX | C3_ITGAX     |
| 6785 RELA  | FGA    | ITGAX | FGA_ITGAX    |

|      |       |          |       |                |
|------|-------|----------|-------|----------------|
| 6786 | CEBPA | C3       | ITGAX | C3_ITGAX       |
| 6787 | CEBPA | FGA      | ITGAX | FGA_ITGAX      |
| 6788 | SP1   | C3       | ITGAX | C3_ITGAX       |
| 6789 | SP1   | FGA      | ITGAX | FGA_ITGAX      |
| 6790 | JUN   | ICAM1    | ITGAX | ICAM1_ITGAX    |
| 6791 | JUN   | C3       | ITGAX | C3_ITGAX       |
| 6792 | JUN   | FGA      | ITGAX | FGA_ITGAX      |
| 6793 | HOXD1 | PLAU     | ITGB1 | PLAU_ITGB1     |
| 6794 | HOXD1 | LAMB1    | ITGB1 | LAMB1_ITGB1    |
| 6795 | HOXD1 | COL11A1  | ITGB1 | COL11A1_ITGB1  |
| 6796 | HOXD1 | ADAM17   | ITGB1 | ADAM17_ITGB1   |
| 6797 | HOXD1 | FGA      | ITGB1 | FGA_ITGB1      |
| 6798 | HOXD1 | VCAN     | ITGB1 | VCAN_ITGB1     |
| 6799 | HOXD1 | TGM2     | ITGB1 | TGM2_ITGB1     |
| 6800 | HOXD1 | ANGPT1   | ITGB1 | ANGPT1_ITGB1   |
| 6801 | HOXD1 | COL1A2   | ITGB1 | COL1A2_ITGB1   |
| 6802 | HOXD1 | COL4A5   | ITGB1 | COL4A5_ITGB1   |
| 6803 | HOXD1 | VTN      | ITGB1 | VTN_ITGB1      |
| 6804 | HOXD1 | VEGFA    | ITGB1 | VEGFA_ITGB1    |
| 6805 | HOXD1 | DUSP18   | ITGB1 | DUSP18_ITGB1   |
| 6806 | HOXD1 | COL6A2   | ITGB1 | COL6A2_ITGB1   |
| 6807 | HOXD1 | FIGF     | ITGB1 | FIGF_ITGB1     |
| 6808 | HOXD1 | ADAM15   | ITGB1 | ADAM15_ITGB1   |
| 6809 | HOXD1 | TNC      | ITGB1 | TNC_ITGB1      |
| 6810 | HOXD1 | NID1     | ITGB1 | NID1_ITGB1     |
| 6811 | HOXD1 | ADAM2    | ITGB1 | ADAM2_ITGB1    |
| 6812 | HOXD1 | COL6A3   | ITGB1 | COL6A3_ITGB1   |
| 6813 | HOXD1 | F13A1    | ITGB1 | F13A1_ITGB1    |
| 6814 | HOXD1 | HSPG2    | ITGB1 | HSPG2_ITGB1    |
| 6815 | HOXD1 | ADAM12   | ITGB1 | ADAM12_ITGB1   |
| 6816 | HOXD1 | COL2A1   | ITGB1 | COL2A1_ITGB1   |
| 6817 | HOXD1 | TIMP2    | ITGB1 | TIMP2_ITGB1    |
| 6818 | HOXD1 | COL5A1   | ITGB1 | COL5A1_ITGB1   |
| 6819 | HOXD1 | COL4A3   | ITGB1 | COL4A3_ITGB1   |
| 6820 | HOXD1 | PLG      | ITGB1 | PLG_ITGB1      |
| 6821 | HOXD1 | FGG      | ITGB1 | FGG_ITGB1      |
| 6822 | HOXD1 | MDK      | ITGB1 | MDK_ITGB1      |
| 6823 | HOXD1 | COL1A1   | ITGB1 | COL1A1_ITGB1   |
| 6824 | HOXD1 | COL7A1   | ITGB1 | COL7A1_ITGB1   |
| 6825 | HOXD1 | COL4A4   | ITGB1 | COL4A4_ITGB1   |
| 6826 | HOXD1 | CHAD     | ITGB1 | CHAD_ITGB1     |
| 6827 | HOXD1 | LAMA1    | ITGB1 | LAMA1_ITGB1    |
| 6828 | HOXD1 | SEMA7A   | ITGB1 | SEMA7A_ITGB1   |
| 6829 | HOXD1 | LAMC1    | ITGB1 | LAMC1_ITGB1    |
| 6830 | HOXD1 | COL18A1  | ITGB1 | COL18A1_ITGB1  |
| 6831 | HOXD1 | COL4A1   | ITGB1 | COL4A1_ITGB1   |
| 6832 | HOXD1 | ADAM9    | ITGB1 | ADAM9_ITGB1    |
| 6833 | HOXD1 | NPNT     | ITGB1 | NPNT_ITGB1     |
| 6834 | HOXD1 | LAMC3    | ITGB1 | LAMC3_ITGB1    |
| 6835 | HOXD1 | CXCL12   | ITGB1 | CXCL12_ITGB1   |
| 6836 | HOXD1 | LAMC2    | ITGB1 | LAMC2_ITGB1    |
| 6837 | HOXD1 | ICAM4    | ITGB1 | ICAM4_ITGB1    |
| 6838 | HOXD1 | LGALS3BP | ITGB1 | LGALS3BP_ITGB1 |
| 6839 | HOXD1 | LAMB3    | ITGB1 | LAMB3_ITGB1    |
| 6840 | HOXD1 | LAMA2    | ITGB1 | LAMA2_ITGB1    |
| 6841 | HOXD1 | FGB      | ITGB1 | FGB_ITGB1      |
| 6842 | HOXD1 | FN1      | ITGB1 | FN1_ITGB1      |
| 6843 | HOXD1 | COL6A1   | ITGB1 | COL6A1_ITGB1   |

|      |       |         |       |               |
|------|-------|---------|-------|---------------|
| 6844 | HOXD1 | COL5A2  | ITGB1 | COL5A2_ITGB1  |
| 6845 | HOXD1 | CD14    | ITGB1 | CD14_ITGB1    |
| 6846 | HOXD1 | THBS1   | ITGB1 | THBS1_ITGB1   |
| 6847 | HOXD1 | CSF2    | ITGB1 | CSF2_ITGB1    |
| 6848 | HOXD1 | VEGFC   | ITGB1 | VEGFC_ITGB1   |
| 6849 | HOXD1 | FBN1    | ITGB1 | FBN1_ITGB1    |
| 6850 | HOXD1 | SPP1    | ITGB1 | SPP1_ITGB1    |
| 6851 | HOXD1 | THBS2   | ITGB1 | THBS2_ITGB1   |
| 6852 | HOXD1 | RELN    | ITGB1 | RELN_ITGB1    |
| 6853 | HOXD1 | COL4A6  | ITGB1 | COL4A6_ITGB1  |
| 6854 | HOXD1 | LAMA4   | ITGB1 | LAMA4_ITGB1   |
| 6855 | HOXD1 | FBLN1   | ITGB1 | FBLN1_ITGB1   |
| 6856 | HOXD1 | MATN1   | ITGB1 | MATN1_ITGB1   |
| 6857 | HOXD1 | COL3A1  | ITGB1 | COL3A1_ITGB1  |
| 6858 | HOXD1 | LAMA5   | ITGB1 | LAMA5_ITGB1   |
| 6859 | HOXD1 | VCAM1   | ITGB1 | VCAM1_ITGB1   |
| 6860 | PAX6  | PLAU    | ITGB1 | PLAU_ITGB1    |
| 6861 | PAX6  | LAMB1   | ITGB1 | LAMB1_ITGB1   |
| 6862 | PAX6  | COL11A1 | ITGB1 | COL11A1_ITGB1 |
| 6863 | PAX6  | ADAM17  | ITGB1 | ADAM17_ITGB1  |
| 6864 | PAX6  | FGA     | ITGB1 | FGA_ITGB1     |
| 6865 | PAX6  | VCAN    | ITGB1 | VCAN_ITGB1    |
| 6866 | PAX6  | TGM2    | ITGB1 | TGM2_ITGB1    |
| 6867 | PAX6  | ANGPT1  | ITGB1 | ANGPT1_ITGB1  |
| 6868 | PAX6  | COL1A2  | ITGB1 | COL1A2_ITGB1  |
| 6869 | PAX6  | COL4A5  | ITGB1 | COL4A5_ITGB1  |
| 6870 | PAX6  | VTN     | ITGB1 | VTN_ITGB1     |
| 6871 | PAX6  | VEGFA   | ITGB1 | VEGFA_ITGB1   |
| 6872 | PAX6  | DUSP18  | ITGB1 | DUSP18_ITGB1  |
| 6873 | PAX6  | COL6A2  | ITGB1 | COL6A2_ITGB1  |
| 6874 | PAX6  | FIGF    | ITGB1 | FIGF_ITGB1    |
| 6875 | PAX6  | ADAM15  | ITGB1 | ADAM15_ITGB1  |
| 6876 | PAX6  | TNC     | ITGB1 | TNC_ITGB1     |
| 6877 | PAX6  | NID1    | ITGB1 | NID1_ITGB1    |
| 6878 | PAX6  | ADAM2   | ITGB1 | ADAM2_ITGB1   |
| 6879 | PAX6  | COL6A3  | ITGB1 | COL6A3_ITGB1  |
| 6880 | PAX6  | F13A1   | ITGB1 | F13A1_ITGB1   |
| 6881 | PAX6  | HSPG2   | ITGB1 | HSPG2_ITGB1   |
| 6882 | PAX6  | ADAM12  | ITGB1 | ADAM12_ITGB1  |
| 6883 | PAX6  | COL2A1  | ITGB1 | COL2A1_ITGB1  |
| 6884 | PAX6  | TIMP2   | ITGB1 | TIMP2_ITGB1   |
| 6885 | PAX6  | COL5A1  | ITGB1 | COL5A1_ITGB1  |
| 6886 | PAX6  | COL4A3  | ITGB1 | COL4A3_ITGB1  |
| 6887 | PAX6  | PLG     | ITGB1 | PLG_ITGB1     |
| 6888 | PAX6  | FGG     | ITGB1 | FGG_ITGB1     |
| 6889 | PAX6  | MDK     | ITGB1 | MDK_ITGB1     |
| 6890 | PAX6  | COL1A1  | ITGB1 | COL1A1_ITGB1  |
| 6891 | PAX6  | COL7A1  | ITGB1 | COL7A1_ITGB1  |
| 6892 | PAX6  | COL4A4  | ITGB1 | COL4A4_ITGB1  |
| 6893 | PAX6  | CHAD    | ITGB1 | CHAD_ITGB1    |
| 6894 | PAX6  | LAMA1   | ITGB1 | LAMA1_ITGB1   |
| 6895 | PAX6  | SEMA7A  | ITGB1 | SEMA7A_ITGB1  |
| 6896 | PAX6  | LAMC1   | ITGB1 | LAMC1_ITGB1   |
| 6897 | PAX6  | COL18A1 | ITGB1 | COL18A1_ITGB1 |
| 6898 | PAX6  | COL4A1  | ITGB1 | COL4A1_ITGB1  |
| 6899 | PAX6  | ADAM9   | ITGB1 | ADAM9_ITGB1   |
| 6900 | PAX6  | NPNT    | ITGB1 | NPNT_ITGB1    |
| 6901 | PAX6  | LAMC3   | ITGB1 | LAMC3_ITGB1   |

|      |        |          |       |                |
|------|--------|----------|-------|----------------|
| 6902 | PAX6   | CXCL12   | ITGB1 | CXCL12_ITGB1   |
| 6903 | PAX6   | LAMC2    | ITGB1 | LAMC2_ITGB1    |
| 6904 | PAX6   | ICAM4    | ITGB1 | ICAM4_ITGB1    |
| 6905 | PAX6   | LGALS3BP | ITGB1 | LGALS3BP_ITGB1 |
| 6906 | PAX6   | LAMB3    | ITGB1 | LAMB3_ITGB1    |
| 6907 | PAX6   | LAMA2    | ITGB1 | LAMA2_ITGB1    |
| 6908 | PAX6   | FGB      | ITGB1 | FGB_ITGB1      |
| 6909 | PAX6   | FN1      | ITGB1 | FN1_ITGB1      |
| 6910 | PAX6   | COL6A1   | ITGB1 | COL6A1_ITGB1   |
| 6911 | PAX6   | COL5A2   | ITGB1 | COL5A2_ITGB1   |
| 6912 | PAX6   | CD14     | ITGB1 | CD14_ITGB1     |
| 6913 | PAX6   | THBS1    | ITGB1 | THBS1_ITGB1    |
| 6914 | PAX6   | CSF2     | ITGB1 | CSF2_ITGB1     |
| 6915 | PAX6   | VEGFC    | ITGB1 | VEGFC_ITGB1    |
| 6916 | PAX6   | FBN1     | ITGB1 | FBN1_ITGB1     |
| 6917 | PAX6   | SPP1     | ITGB1 | SPP1_ITGB1     |
| 6918 | PAX6   | THBS2    | ITGB1 | THBS2_ITGB1    |
| 6919 | PAX6   | RELN     | ITGB1 | RELN_ITGB1     |
| 6920 | PAX6   | COL4A6   | ITGB1 | COL4A6_ITGB1   |
| 6921 | PAX6   | LAMA4    | ITGB1 | LAMA4_ITGB1    |
| 6922 | PAX6   | FBLN1    | ITGB1 | FBLN1_ITGB1    |
| 6923 | PAX6   | MATN1    | ITGB1 | MATN1_ITGB1    |
| 6924 | PAX6   | COL3A1   | ITGB1 | COL3A1_ITGB1   |
| 6925 | PAX6   | LAMA5    | ITGB1 | LAMA5_ITGB1    |
| 6926 | PAX6   | VCAM1    | ITGB1 | VCAM1_ITGB1    |
| 6927 | TWIST1 | PLAU     | ITGB1 | PLAU_ITGB1     |
| 6928 | TWIST1 | LAMB1    | ITGB1 | LAMB1_ITGB1    |
| 6929 | TWIST1 | COL11A1  | ITGB1 | COL11A1_ITGB1  |
| 6930 | TWIST1 | ADAM17   | ITGB1 | ADAM17_ITGB1   |
| 6931 | TWIST1 | FGA      | ITGB1 | FGA_ITGB1      |
| 6932 | TWIST1 | VCAN     | ITGB1 | VCAN_ITGB1     |
| 6933 | TWIST1 | TGM2     | ITGB1 | TGM2_ITGB1     |
| 6934 | TWIST1 | ANGPT1   | ITGB1 | ANGPT1_ITGB1   |
| 6935 | TWIST1 | COL1A2   | ITGB1 | COL1A2_ITGB1   |
| 6936 | TWIST1 | COL4A5   | ITGB1 | COL4A5_ITGB1   |
| 6937 | TWIST1 | VTN      | ITGB1 | VTN_ITGB1      |
| 6938 | TWIST1 | VEGFA    | ITGB1 | VEGFA_ITGB1    |
| 6939 | TWIST1 | DUSP18   | ITGB1 | DUSP18_ITGB1   |
| 6940 | TWIST1 | COL6A2   | ITGB1 | COL6A2_ITGB1   |
| 6941 | TWIST1 | FIGF     | ITGB1 | FIGF_ITGB1     |
| 6942 | TWIST1 | ADAM15   | ITGB1 | ADAM15_ITGB1   |
| 6943 | TWIST1 | TNC      | ITGB1 | TNC_ITGB1      |
| 6944 | TWIST1 | NID1     | ITGB1 | NID1_ITGB1     |
| 6945 | TWIST1 | ADAM2    | ITGB1 | ADAM2_ITGB1    |
| 6946 | TWIST1 | COL6A3   | ITGB1 | COL6A3_ITGB1   |
| 6947 | TWIST1 | F13A1    | ITGB1 | F13A1_ITGB1    |
| 6948 | TWIST1 | HSPG2    | ITGB1 | HSPG2_ITGB1    |
| 6949 | TWIST1 | ADAM12   | ITGB1 | ADAM12_ITGB1   |
| 6950 | TWIST1 | COL2A1   | ITGB1 | COL2A1_ITGB1   |
| 6951 | TWIST1 | TIMP2    | ITGB1 | TIMP2_ITGB1    |
| 6952 | TWIST1 | COL5A1   | ITGB1 | COL5A1_ITGB1   |
| 6953 | TWIST1 | COL4A3   | ITGB1 | COL4A3_ITGB1   |
| 6954 | TWIST1 | PLG      | ITGB1 | PLG_ITGB1      |
| 6955 | TWIST1 | FGG      | ITGB1 | FGG_ITGB1      |
| 6956 | TWIST1 | MDK      | ITGB1 | MDK_ITGB1      |
| 6957 | TWIST1 | COL1A1   | ITGB1 | COL1A1_ITGB1   |
| 6958 | TWIST1 | COL7A1   | ITGB1 | COL7A1_ITGB1   |
| 6959 | TWIST1 | COL4A4   | ITGB1 | COL4A4_ITGB1   |



|      |        |          |       |                |
|------|--------|----------|-------|----------------|
| 6960 | TWIST1 | CHAD     | ITGB1 | CHAD_ITGB1     |
| 6961 | TWIST1 | LAMA1    | ITGB1 | LAMA1_ITGB1    |
| 6962 | TWIST1 | SEMA7A   | ITGB1 | SEMA7A_ITGB1   |
| 6963 | TWIST1 | LAMC1    | ITGB1 | LAMC1_ITGB1    |
| 6964 | TWIST1 | COL18A1  | ITGB1 | COL18A1_ITGB1  |
| 6965 | TWIST1 | COL4A1   | ITGB1 | COL4A1_ITGB1   |
| 6966 | TWIST1 | ADAM9    | ITGB1 | ADAM9_ITGB1    |
| 6967 | TWIST1 | NPNT     | ITGB1 | NPNT_ITGB1     |
| 6968 | TWIST1 | LAMC3    | ITGB1 | LAMC3_ITGB1    |
| 6969 | TWIST1 | CXCL12   | ITGB1 | CXCL12_ITGB1   |
| 6970 | TWIST1 | LAMC2    | ITGB1 | LAMC2_ITGB1    |
| 6971 | TWIST1 | ICAM4    | ITGB1 | ICAM4_ITGB1    |
| 6972 | TWIST1 | LGALS3BP | ITGB1 | LGALS3BP_ITGB1 |
| 6973 | TWIST1 | LAMB3    | ITGB1 | LAMB3_ITGB1    |
| 6974 | TWIST1 | LAMA2    | ITGB1 | LAMA2_ITGB1    |
| 6975 | TWIST1 | FGB      | ITGB1 | FGB_ITGB1      |
| 6976 | TWIST1 | COL6A1   | ITGB1 | COL6A1_ITGB1   |
| 6977 | TWIST1 | COL5A2   | ITGB1 | COL5A2_ITGB1   |
| 6978 | TWIST1 | CD14     | ITGB1 | CD14_ITGB1     |
| 6979 | TWIST1 | THBS1    | ITGB1 | THBS1_ITGB1    |
| 6980 | TWIST1 | CSF2     | ITGB1 | CSF2_ITGB1     |
| 6981 | TWIST1 | VEGFC    | ITGB1 | VEGFC_ITGB1    |
| 6982 | TWIST1 | FBN1     | ITGB1 | FBN1_ITGB1     |
| 6983 | TWIST1 | SPP1     | ITGB1 | SPP1_ITGB1     |
| 6984 | TWIST1 | THBS2    | ITGB1 | THBS2_ITGB1    |
| 6985 | TWIST1 | RELN     | ITGB1 | RELN_ITGB1     |
| 6986 | TWIST1 | COL4A6   | ITGB1 | COL4A6_ITGB1   |
| 6987 | TWIST1 | LAMA4    | ITGB1 | LAMA4_ITGB1    |
| 6988 | TWIST1 | FBLN1    | ITGB1 | FBLN1_ITGB1    |
| 6989 | TWIST1 | MATN1    | ITGB1 | MATN1_ITGB1    |
| 6990 | TWIST1 | COL3A1   | ITGB1 | COL3A1_ITGB1   |
| 6991 | TWIST1 | LAMA5    | ITGB1 | LAMA5_ITGB1    |
| 6992 | TWIST1 | VCAM1    | ITGB1 | VCAM1_ITGB1    |
| 6993 | HOXD3  | LAMB1    | ITGB1 | LAMB1_ITGB1    |
| 6994 | HOXD3  | COL11A1  | ITGB1 | COL11A1_ITGB1  |
| 6995 | HOXD3  | ADAM17   | ITGB1 | ADAM17_ITGB1   |
| 6996 | HOXD3  | FGA      | ITGB1 | FGA_ITGB1      |
| 6997 | HOXD3  | VCAN     | ITGB1 | VCAN_ITGB1     |
| 6998 | HOXD3  | TGM2     | ITGB1 | TGM2_ITGB1     |
| 6999 | HOXD3  | ANGPT1   | ITGB1 | ANGPT1_ITGB1   |
| 7000 | HOXD3  | COL1A2   | ITGB1 | COL1A2_ITGB1   |
| 7001 | HOXD3  | COL4A5   | ITGB1 | COL4A5_ITGB1   |
| 7002 | HOXD3  | VTN      | ITGB1 | VTN_ITGB1      |
| 7003 | HOXD3  | VEGFA    | ITGB1 | VEGFA_ITGB1    |
| 7004 | HOXD3  | DUSP18   | ITGB1 | DUSP18_ITGB1   |
| 7005 | HOXD3  | COL6A2   | ITGB1 | COL6A2_ITGB1   |
| 7006 | HOXD3  | FIGF     | ITGB1 | FIGF_ITGB1     |
| 7007 | HOXD3  | ADAM15   | ITGB1 | ADAM15_ITGB1   |
| 7008 | HOXD3  | TNC      | ITGB1 | TNC_ITGB1      |
| 7009 | HOXD3  | NID1     | ITGB1 | NID1_ITGB1     |
| 7010 | HOXD3  | ADAM2    | ITGB1 | ADAM2_ITGB1    |
| 7011 | HOXD3  | COL6A3   | ITGB1 | COL6A3_ITGB1   |
| 7012 | HOXD3  | F13A1    | ITGB1 | F13A1_ITGB1    |
| 7013 | HOXD3  | HSPG2    | ITGB1 | HSPG2_ITGB1    |
| 7014 | HOXD3  | ADAM12   | ITGB1 | ADAM12_ITGB1   |
| 7015 | HOXD3  | COL2A1   | ITGB1 | COL2A1_ITGB1   |
| 7016 | HOXD3  | TIMP2    | ITGB1 | TIMP2_ITGB1    |
| 7017 | HOXD3  | COL5A1   | ITGB1 | COL5A1_ITGB1   |

|      |        |          |       |                |
|------|--------|----------|-------|----------------|
| 7018 | HOXD3  | COL4A3   | ITGB1 | COL4A3_ITGB1   |
| 7019 | HOXD3  | PLG      | ITGB1 | PLG_ITGB1      |
| 7020 | HOXD3  | FGG      | ITGB1 | FGG_ITGB1      |
| 7021 | HOXD3  | MDK      | ITGB1 | MDK_ITGB1      |
| 7022 | HOXD3  | COL1A1   | ITGB1 | COL1A1_ITGB1   |
| 7023 | HOXD3  | COL7A1   | ITGB1 | COL7A1_ITGB1   |
| 7024 | HOXD3  | COL4A4   | ITGB1 | COL4A4_ITGB1   |
| 7025 | HOXD3  | CHAD     | ITGB1 | CHAD_ITGB1     |
| 7026 | HOXD3  | LAMA1    | ITGB1 | LAMA1_ITGB1    |
| 7027 | HOXD3  | SEMA7A   | ITGB1 | SEMA7A_ITGB1   |
| 7028 | HOXD3  | LAMC1    | ITGB1 | LAMC1_ITGB1    |
| 7029 | HOXD3  | COL18A1  | ITGB1 | COL18A1_ITGB1  |
| 7030 | HOXD3  | COL4A1   | ITGB1 | COL4A1_ITGB1   |
| 7031 | HOXD3  | ADAM9    | ITGB1 | ADAM9_ITGB1    |
| 7032 | HOXD3  | NPNT     | ITGB1 | NPNT_ITGB1     |
| 7033 | HOXD3  | LAMC3    | ITGB1 | LAMC3_ITGB1    |
| 7034 | HOXD3  | CXCL12   | ITGB1 | CXCL12_ITGB1   |
| 7035 | HOXD3  | LAMC2    | ITGB1 | LAMC2_ITGB1    |
| 7036 | HOXD3  | ICAM4    | ITGB1 | ICAM4_ITGB1    |
| 7037 | HOXD3  | LGALS3BP | ITGB1 | LGALS3BP_ITGB1 |
| 7038 | HOXD3  | LAMB3    | ITGB1 | LAMB3_ITGB1    |
| 7039 | HOXD3  | LAMA2    | ITGB1 | LAMA2_ITGB1    |
| 7040 | HOXD3  | FGB      | ITGB1 | FGB_ITGB1      |
| 7041 | HOXD3  | FN1      | ITGB1 | FN1_ITGB1      |
| 7042 | HOXD3  | COL6A1   | ITGB1 | COL6A1_ITGB1   |
| 7043 | HOXD3  | COL5A2   | ITGB1 | COL5A2_ITGB1   |
| 7044 | HOXD3  | CD14     | ITGB1 | CD14_ITGB1     |
| 7045 | HOXD3  | THBS1    | ITGB1 | THBS1_ITGB1    |
| 7046 | HOXD3  | CSF2     | ITGB1 | CSF2_ITGB1     |
| 7047 | HOXD3  | VEGFC    | ITGB1 | VEGFC_ITGB1    |
| 7048 | HOXD3  | FBN1     | ITGB1 | FBN1_ITGB1     |
| 7049 | HOXD3  | SPP1     | ITGB1 | SPP1_ITGB1     |
| 7050 | HOXD3  | THBS2    | ITGB1 | THBS2_ITGB1    |
| 7051 | HOXD3  | RELN     | ITGB1 | RELN_ITGB1     |
| 7052 | HOXD3  | COL4A6   | ITGB1 | COL4A6_ITGB1   |
| 7053 | HOXD3  | LAMA4    | ITGB1 | LAMA4_ITGB1    |
| 7054 | HOXD3  | FBLN1    | ITGB1 | FBLN1_ITGB1    |
| 7055 | HOXD3  | MATN1    | ITGB1 | MATN1_ITGB1    |
| 7056 | HOXD3  | COL3A1   | ITGB1 | COL3A1_ITGB1   |
| 7057 | HOXD3  | LAMA5    | ITGB1 | LAMA5_ITGB1    |
| 7058 | HOXD3  | VCAM1    | ITGB1 | VCAM1_ITGB1    |
| 7059 | TWIST2 | PLAU     | ITGB1 | PLAU_ITGB1     |
| 7060 | TWIST2 | LAMB1    | ITGB1 | LAMB1_ITGB1    |
| 7061 | TWIST2 | COL11A1  | ITGB1 | COL11A1_ITGB1  |
| 7062 | TWIST2 | ADAM17   | ITGB1 | ADAM17_ITGB1   |
| 7063 | TWIST2 | FGA      | ITGB1 | FGA_ITGB1      |
| 7064 | TWIST2 | VCAN     | ITGB1 | VCAN_ITGB1     |
| 7065 | TWIST2 | TGM2     | ITGB1 | TGM2_ITGB1     |
| 7066 | TWIST2 | ANGPT1   | ITGB1 | ANGPT1_ITGB1   |
| 7067 | TWIST2 | COL1A2   | ITGB1 | COL1A2_ITGB1   |
| 7068 | TWIST2 | COL4A5   | ITGB1 | COL4A5_ITGB1   |
| 7069 | TWIST2 | VTN      | ITGB1 | VTN_ITGB1      |
| 7070 | TWIST2 | VEGFA    | ITGB1 | VEGFA_ITGB1    |
| 7071 | TWIST2 | DUSP18   | ITGB1 | DUSP18_ITGB1   |
| 7072 | TWIST2 | COL6A2   | ITGB1 | COL6A2_ITGB1   |
| 7073 | TWIST2 | FIGF     | ITGB1 | FIGF_ITGB1     |
| 7074 | TWIST2 | ADAM15   | ITGB1 | ADAM15_ITGB1   |
| 7075 | TWIST2 | TNC      | ITGB1 | TNC_ITGB1      |

|      |        |          |       |                |
|------|--------|----------|-------|----------------|
| 7076 | TWIST2 | NID1     | ITGB1 | NID1_ITGB1     |
| 7077 | TWIST2 | ADAM2    | ITGB1 | ADAM2_ITGB1    |
| 7078 | TWIST2 | COL6A3   | ITGB1 | COL6A3_ITGB1   |
| 7079 | TWIST2 | F13A1    | ITGB1 | F13A1_ITGB1    |
| 7080 | TWIST2 | HSPG2    | ITGB1 | HSPG2_ITGB1    |
| 7081 | TWIST2 | ADAM12   | ITGB1 | ADAM12_ITGB1   |
| 7082 | TWIST2 | COL2A1   | ITGB1 | COL2A1_ITGB1   |
| 7083 | TWIST2 | TIMP2    | ITGB1 | TIMP2_ITGB1    |
| 7084 | TWIST2 | COL5A1   | ITGB1 | COL5A1_ITGB1   |
| 7085 | TWIST2 | COL4A3   | ITGB1 | COL4A3_ITGB1   |
| 7086 | TWIST2 | PLG      | ITGB1 | PLG_ITGB1      |
| 7087 | TWIST2 | FGG      | ITGB1 | FGG_ITGB1      |
| 7088 | TWIST2 | MDK      | ITGB1 | MDK_ITGB1      |
| 7089 | TWIST2 | COL1A1   | ITGB1 | COL1A1_ITGB1   |
| 7090 | TWIST2 | COL7A1   | ITGB1 | COL7A1_ITGB1   |
| 7091 | TWIST2 | COL4A4   | ITGB1 | COL4A4_ITGB1   |
| 7092 | TWIST2 | CHAD     | ITGB1 | CHAD_ITGB1     |
| 7093 | TWIST2 | LAMA1    | ITGB1 | LAMA1_ITGB1    |
| 7094 | TWIST2 | SEMA7A   | ITGB1 | SEMA7A_ITGB1   |
| 7095 | TWIST2 | LAMC1    | ITGB1 | LAMC1_ITGB1    |
| 7096 | TWIST2 | COL18A1  | ITGB1 | COL18A1_ITGB1  |
| 7097 | TWIST2 | COL4A1   | ITGB1 | COL4A1_ITGB1   |
| 7098 | TWIST2 | ADAM9    | ITGB1 | ADAM9_ITGB1    |
| 7099 | TWIST2 | NPNT     | ITGB1 | NPNT_ITGB1     |
| 7100 | TWIST2 | LAMC3    | ITGB1 | LAMC3_ITGB1    |
| 7101 | TWIST2 | CXCL12   | ITGB1 | CXCL12_ITGB1   |
| 7102 | TWIST2 | LAMC2    | ITGB1 | LAMC2_ITGB1    |
| 7103 | TWIST2 | ICAM4    | ITGB1 | ICAM4_ITGB1    |
| 7104 | TWIST2 | LGALS3BP | ITGB1 | LGALS3BP_ITGB1 |
| 7105 | TWIST2 | LAMB3    | ITGB1 | LAMB3_ITGB1    |
| 7106 | TWIST2 | LAMA2    | ITGB1 | LAMA2_ITGB1    |
| 7107 | TWIST2 | FGB      | ITGB1 | FGB_ITGB1      |
| 7108 | TWIST2 | COL6A1   | ITGB1 | COL6A1_ITGB1   |
| 7109 | TWIST2 | COL5A2   | ITGB1 | COL5A2_ITGB1   |
| 7110 | TWIST2 | CD14     | ITGB1 | CD14_ITGB1     |
| 7111 | TWIST2 | THBS1    | ITGB1 | THBS1_ITGB1    |
| 7112 | TWIST2 | CSF2     | ITGB1 | CSF2_ITGB1     |
| 7113 | TWIST2 | VEGFC    | ITGB1 | VEGFC_ITGB1    |
| 7114 | TWIST2 | FBN1     | ITGB1 | FBN1_ITGB1     |
| 7115 | TWIST2 | SPP1     | ITGB1 | SPP1_ITGB1     |
| 7116 | TWIST2 | THBS2    | ITGB1 | THBS2_ITGB1    |
| 7117 | TWIST2 | RELN     | ITGB1 | RELN_ITGB1     |
| 7118 | TWIST2 | COL4A6   | ITGB1 | COL4A6_ITGB1   |
| 7119 | TWIST2 | LAMA4    | ITGB1 | LAMA4_ITGB1    |
| 7120 | TWIST2 | FBLN1    | ITGB1 | FBLN1_ITGB1    |
| 7121 | TWIST2 | MATN1    | ITGB1 | MATN1_ITGB1    |
| 7122 | TWIST2 | COL3A1   | ITGB1 | COL3A1_ITGB1   |
| 7123 | TWIST2 | LAMA5    | ITGB1 | LAMA5_ITGB1    |
| 7124 | TWIST2 | VCAM1    | ITGB1 | VCAM1_ITGB1    |
| 7125 | FOXF2  | PLAU     | ITGB1 | PLAU_ITGB1     |
| 7126 | FOXF2  | LAMB1    | ITGB1 | LAMB1_ITGB1    |
| 7127 | FOXF2  | COL11A1  | ITGB1 | COL11A1_ITGB1  |
| 7128 | FOXF2  | ADAM17   | ITGB1 | ADAM17_ITGB1   |
| 7129 | FOXF2  | FGA      | ITGB1 | FGA_ITGB1      |
| 7130 | FOXF2  | VCAN     | ITGB1 | VCAN_ITGB1     |
| 7131 | FOXF2  | TGM2     | ITGB1 | TGM2_ITGB1     |
| 7132 | FOXF2  | ANGPT1   | ITGB1 | ANGPT1_ITGB1   |
| 7133 | FOXF2  | COL1A2   | ITGB1 | COL1A2_ITGB1   |

|      |       |          |       |                |
|------|-------|----------|-------|----------------|
| 7134 | FOXF2 | COL4A5   | ITGB1 | COL4A5_ITGB1   |
| 7135 | FOXF2 | VTN      | ITGB1 | VTN_ITGB1      |
| 7136 | FOXF2 | VEGFA    | ITGB1 | VEGFA_ITGB1    |
| 7137 | FOXF2 | DUSP18   | ITGB1 | DUSP18_ITGB1   |
| 7138 | FOXF2 | COL6A2   | ITGB1 | COL6A2_ITGB1   |
| 7139 | FOXF2 | FIGF     | ITGB1 | FIGF_ITGB1     |
| 7140 | FOXF2 | ADAM15   | ITGB1 | ADAM15_ITGB1   |
| 7141 | FOXF2 | TNC      | ITGB1 | TNC_ITGB1      |
| 7142 | FOXF2 | NID1     | ITGB1 | NID1_ITGB1     |
| 7143 | FOXF2 | ADAM2    | ITGB1 | ADAM2_ITGB1    |
| 7144 | FOXF2 | COL6A3   | ITGB1 | COL6A3_ITGB1   |
| 7145 | FOXF2 | F13A1    | ITGB1 | F13A1_ITGB1    |
| 7146 | FOXF2 | HSPG2    | ITGB1 | HSPG2_ITGB1    |
| 7147 | FOXF2 | ADAM12   | ITGB1 | ADAM12_ITGB1   |
| 7148 | FOXF2 | COL2A1   | ITGB1 | COL2A1_ITGB1   |
| 7149 | FOXF2 | TIMP2    | ITGB1 | TIMP2_ITGB1    |
| 7150 | FOXF2 | COL5A1   | ITGB1 | COL5A1_ITGB1   |
| 7151 | FOXF2 | COL4A3   | ITGB1 | COL4A3_ITGB1   |
| 7152 | FOXF2 | PLG      | ITGB1 | PLG_ITGB1      |
| 7153 | FOXF2 | FGG      | ITGB1 | FGG_ITGB1      |
| 7154 | FOXF2 | MDK      | ITGB1 | MDK_ITGB1      |
| 7155 | FOXF2 | COL1A1   | ITGB1 | COL1A1_ITGB1   |
| 7156 | FOXF2 | COL7A1   | ITGB1 | COL7A1_ITGB1   |
| 7157 | FOXF2 | COL4A4   | ITGB1 | COL4A4_ITGB1   |
| 7158 | FOXF2 | CHAD     | ITGB1 | CHAD_ITGB1     |
| 7159 | FOXF2 | LAMA1    | ITGB1 | LAMA1_ITGB1    |
| 7160 | FOXF2 | SEMA7A   | ITGB1 | SEMA7A_ITGB1   |
| 7161 | FOXF2 | LAMC1    | ITGB1 | LAMC1_ITGB1    |
| 7162 | FOXF2 | COL18A1  | ITGB1 | COL18A1_ITGB1  |
| 7163 | FOXF2 | COL4A1   | ITGB1 | COL4A1_ITGB1   |
| 7164 | FOXF2 | ADAM9    | ITGB1 | ADAM9_ITGB1    |
| 7165 | FOXF2 | NPNT     | ITGB1 | NPNT_ITGB1     |
| 7166 | FOXF2 | LAMC3    | ITGB1 | LAMC3_ITGB1    |
| 7167 | FOXF2 | LAMC2    | ITGB1 | LAMC2_ITGB1    |
| 7168 | FOXF2 | ICAM4    | ITGB1 | ICAM4_ITGB1    |
| 7169 | FOXF2 | LGALS3BP | ITGB1 | LGALS3BP_ITGB1 |
| 7170 | FOXF2 | LAMB3    | ITGB1 | LAMB3_ITGB1    |
| 7171 | FOXF2 | LAMA2    | ITGB1 | LAMA2_ITGB1    |
| 7172 | FOXF2 | FGB      | ITGB1 | FGB_ITGB1      |
| 7173 | FOXF2 | FN1      | ITGB1 | FN1_ITGB1      |
| 7174 | FOXF2 | COL6A1   | ITGB1 | COL6A1_ITGB1   |
| 7175 | FOXF2 | COL5A2   | ITGB1 | COL5A2_ITGB1   |
| 7176 | FOXF2 | CD14     | ITGB1 | CD14_ITGB1     |
| 7177 | FOXF2 | THBS1    | ITGB1 | THBS1_ITGB1    |
| 7178 | FOXF2 | CSF2     | ITGB1 | CSF2_ITGB1     |
| 7179 | FOXF2 | VEGFC    | ITGB1 | VEGFC_ITGB1    |
| 7180 | FOXF2 | FBN1     | ITGB1 | FBN1_ITGB1     |
| 7181 | FOXF2 | SPP1     | ITGB1 | SPP1_ITGB1     |
| 7182 | FOXF2 | THBS2    | ITGB1 | THBS2_ITGB1    |
| 7183 | FOXF2 | RELN     | ITGB1 | RELN_ITGB1     |
| 7184 | FOXF2 | COL4A6   | ITGB1 | COL4A6_ITGB1   |
| 7185 | FOXF2 | LAMA4    | ITGB1 | LAMA4_ITGB1    |
| 7186 | FOXF2 | FBLN1    | ITGB1 | FBLN1_ITGB1    |
| 7187 | FOXF2 | MATN1    | ITGB1 | MATN1_ITGB1    |
| 7188 | FOXF2 | COL3A1   | ITGB1 | COL3A1_ITGB1   |
| 7189 | FOXF2 | LAMA5    | ITGB1 | LAMA5_ITGB1    |
| 7190 | FOXF2 | VCAM1    | ITGB1 | VCAM1_ITGB1    |
| 7191 | SPI1  | ICAM3    | ITGB2 | ICAM3_ITGB2    |

|            |        |       |              |
|------------|--------|-------|--------------|
| 7192 SPI1  | FGA    | ITGB2 | FGA_ITGB2    |
| 7193 SPI1  | SPON2  | ITGB2 | SPON2_ITGB2  |
| 7194 SPI1  | ICAM2  | ITGB2 | ICAM2_ITGB2  |
| 7195 SPI1  | PLAU   | ITGB2 | PLAU_ITGB2   |
| 7196 SPI1  | PROC   | ITGB2 | PROC_ITGB2   |
| 7197 SPI1  | ICAM5  | ITGB2 | ICAM5_ITGB2  |
| 7198 SPI1  | FGB    | ITGB2 | FGB_ITGB2    |
| 7199 SPI1  | KNG1   | ITGB2 | KNG1_ITGB2   |
| 7200 SPI1  | CYR61  | ITGB2 | CYR61_ITGB2  |
| 7201 SPI1  | LPA    | ITGB2 | LPA_ITGB2    |
| 7202 SPI1  | CTGF   | ITGB2 | CTGF_ITGB2   |
| 7203 SPI1  | HP     | ITGB2 | HP_ITGB2     |
| 7204 SPI1  | PLAT   | ITGB2 | PLAT_ITGB2   |
| 7205 SPI1  | MMP9   | ITGB2 | MMP9_ITGB2   |
| 7206 SPI1  | SELPLG | ITGB2 | SELPLG_ITGB2 |
| 7207 SPI1  | C3     | ITGB2 | C3_ITGB2     |
| 7208 SPI1  | ICAM1  | ITGB2 | ICAM1_ITGB2  |
| 7209 SPI1  | ICAM4  | ITGB2 | ICAM4_ITGB2  |
| 7210 SPI1  | F10    | ITGB2 | F10_ITGB2    |
| 7211 SPI1  | FGG    | ITGB2 | FGG_ITGB2    |
| 7212 SPI1  | APOB   | ITGB2 | APOB_ITGB2   |
| 7213 SPI1  | CD40LG | ITGB2 | CD40LG_ITGB2 |
| 7214 SPI1  | VCAM1  | ITGB2 | VCAM1_ITGB2  |
| 7215 SPI1  | PLG    | ITGB2 | PLG_ITGB2    |
| 7216 KLF5  | ICAM3  | ITGB2 | ICAM3_ITGB2  |
| 7217 KLF5  | FGA    | ITGB2 | FGA_ITGB2    |
| 7218 KLF5  | SPON2  | ITGB2 | SPON2_ITGB2  |
| 7219 KLF5  | ICAM2  | ITGB2 | ICAM2_ITGB2  |
| 7220 KLF5  | PLAU   | ITGB2 | PLAU_ITGB2   |
| 7221 KLF5  | PROC   | ITGB2 | PROC_ITGB2   |
| 7222 KLF5  | ICAM5  | ITGB2 | ICAM5_ITGB2  |
| 7223 KLF5  | FGB    | ITGB2 | FGB_ITGB2    |
| 7224 KLF5  | KNG1   | ITGB2 | KNG1_ITGB2   |
| 7225 KLF5  | CYR61  | ITGB2 | CYR61_ITGB2  |
| 7226 KLF5  | LPA    | ITGB2 | LPA_ITGB2    |
| 7227 KLF5  | CTGF   | ITGB2 | CTGF_ITGB2   |
| 7228 KLF5  | HP     | ITGB2 | HP_ITGB2     |
| 7229 KLF5  | PLAT   | ITGB2 | PLAT_ITGB2   |
| 7230 KLF5  | SELPLG | ITGB2 | SELPLG_ITGB2 |
| 7231 KLF5  | C3     | ITGB2 | C3_ITGB2     |
| 7232 KLF5  | ICAM1  | ITGB2 | ICAM1_ITGB2  |
| 7233 KLF5  | ICAM4  | ITGB2 | ICAM4_ITGB2  |
| 7234 KLF5  | F10    | ITGB2 | F10_ITGB2    |
| 7235 KLF5  | FGG    | ITGB2 | FGG_ITGB2    |
| 7236 KLF5  | APOB   | ITGB2 | APOB_ITGB2   |
| 7237 KLF5  | CD40LG | ITGB2 | CD40LG_ITGB2 |
| 7238 KLF5  | VCAM1  | ITGB2 | VCAM1_ITGB2  |
| 7239 KLF5  | PLG    | ITGB2 | PLG_ITGB2    |
| 7240 HIF1A | ICAM3  | ITGB2 | ICAM3_ITGB2  |
| 7241 HIF1A | FGA    | ITGB2 | FGA_ITGB2    |
| 7242 HIF1A | SPON2  | ITGB2 | SPON2_ITGB2  |
| 7243 HIF1A | ICAM2  | ITGB2 | ICAM2_ITGB2  |
| 7244 HIF1A | PROC   | ITGB2 | PROC_ITGB2   |
| 7245 HIF1A | ICAM5  | ITGB2 | ICAM5_ITGB2  |
| 7246 HIF1A | FGB    | ITGB2 | FGB_ITGB2    |
| 7247 HIF1A | KNG1   | ITGB2 | KNG1_ITGB2   |
| 7248 HIF1A | CYR61  | ITGB2 | CYR61_ITGB2  |
| 7249 HIF1A | LPA    | ITGB2 | LPA_ITGB2    |

|      |       |        |       |              |
|------|-------|--------|-------|--------------|
| 7250 | HIF1A | HP     | ITGB2 | HP_ITGB2     |
| 7251 | HIF1A | PLAT   | ITGB2 | PLAT_ITGB2   |
| 7252 | HIF1A | MMP9   | ITGB2 | MMP9_ITGB2   |
| 7253 | HIF1A | SELPLG | ITGB2 | SELPLG_ITGB2 |
| 7254 | HIF1A | C3     | ITGB2 | C3_ITGB2     |
| 7255 | HIF1A | ICAM1  | ITGB2 | ICAM1_ITGB2  |
| 7256 | HIF1A | ICAM4  | ITGB2 | ICAM4_ITGB2  |
| 7257 | HIF1A | F10    | ITGB2 | F10_ITGB2    |
| 7258 | HIF1A | FGG    | ITGB2 | FGG_ITGB2    |
| 7259 | HIF1A | APOB   | ITGB2 | APOB_ITGB2   |
| 7260 | HIF1A | CD40LG | ITGB2 | CD40LG_ITGB2 |
| 7261 | HIF1A | VCAM1  | ITGB2 | VCAM1_ITGB2  |
| 7262 | HIF1A | PLG    | ITGB2 | PLG_ITGB2    |
| 7263 | RUNX1 | ICAM3  | ITGB2 | ICAM3_ITGB2  |
| 7264 | RUNX1 | FGA    | ITGB2 | FGA_ITGB2    |
| 7265 | RUNX1 | SPON2  | ITGB2 | SPON2_ITGB2  |
| 7266 | RUNX1 | ICAM2  | ITGB2 | ICAM2_ITGB2  |
| 7267 | RUNX1 | PLAU   | ITGB2 | PLAU_ITGB2   |
| 7268 | RUNX1 | PROC   | ITGB2 | PROC_ITGB2   |
| 7269 | RUNX1 | ICAM5  | ITGB2 | ICAM5_ITGB2  |
| 7270 | RUNX1 | FGB    | ITGB2 | FGB_ITGB2    |
| 7271 | RUNX1 | KNG1   | ITGB2 | KNG1_ITGB2   |
| 7272 | RUNX1 | CYR61  | ITGB2 | CYR61_ITGB2  |
| 7273 | RUNX1 | LPA    | ITGB2 | LPA_ITGB2    |
| 7274 | RUNX1 | CTGF   | ITGB2 | CTGF_ITGB2   |
| 7275 | RUNX1 | HP     | ITGB2 | HP_ITGB2     |
| 7276 | RUNX1 | PLAT   | ITGB2 | PLAT_ITGB2   |
| 7277 | RUNX1 | MMP9   | ITGB2 | MMP9_ITGB2   |
| 7278 | RUNX1 | SELPLG | ITGB2 | SELPLG_ITGB2 |
| 7279 | RUNX1 | C3     | ITGB2 | C3_ITGB2     |
| 7280 | RUNX1 | ICAM1  | ITGB2 | ICAM1_ITGB2  |
| 7281 | RUNX1 | ICAM4  | ITGB2 | ICAM4_ITGB2  |
| 7282 | RUNX1 | F10    | ITGB2 | F10_ITGB2    |
| 7283 | RUNX1 | FGG    | ITGB2 | FGG_ITGB2    |
| 7284 | RUNX1 | APOB   | ITGB2 | APOB_ITGB2   |
| 7285 | RUNX1 | CD40LG | ITGB2 | CD40LG_ITGB2 |
| 7286 | RUNX1 | VCAM1  | ITGB2 | VCAM1_ITGB2  |
| 7287 | RUNX1 | PLG    | ITGB2 | PLG_ITGB2    |
| 7288 | SP1   | ICAM3  | ITGB2 | ICAM3_ITGB2  |
| 7289 | SP1   | FGA    | ITGB2 | FGA_ITGB2    |
| 7290 | SP1   | SPON2  | ITGB2 | SPON2_ITGB2  |
| 7291 | SP1   | ICAM2  | ITGB2 | ICAM2_ITGB2  |
| 7292 | SP1   | PROC   | ITGB2 | PROC_ITGB2   |
| 7293 | SP1   | ICAM5  | ITGB2 | ICAM5_ITGB2  |
| 7294 | SP1   | FGB    | ITGB2 | FGB_ITGB2    |
| 7295 | SP1   | KNG1   | ITGB2 | KNG1_ITGB2   |
| 7296 | SP1   | CYR61  | ITGB2 | CYR61_ITGB2  |
| 7297 | SP1   | LPA    | ITGB2 | LPA_ITGB2    |
| 7298 | SP1   | HP     | ITGB2 | HP_ITGB2     |
| 7299 | SP1   | SELPLG | ITGB2 | SELPLG_ITGB2 |
| 7300 | SP1   | C3     | ITGB2 | C3_ITGB2     |
| 7301 | SP1   | ICAM4  | ITGB2 | ICAM4_ITGB2  |
| 7302 | SP1   | FGG    | ITGB2 | FGG_ITGB2    |
| 7303 | SP1   | APOB   | ITGB2 | APOB_ITGB2   |
| 7304 | SP1   | CD40LG | ITGB2 | CD40LG_ITGB2 |
| 7305 | SP1   | VCAM1  | ITGB2 | VCAM1_ITGB2  |
| 7306 | SP1   | PLG    | ITGB2 | PLG_ITGB2    |
| 7307 | JUND  | FN1    | ITGB3 | FN1_ITGB3    |

|             |         |         |               |
|-------------|---------|---------|---------------|
| 7308 JUND   | TGM2    | ITGB3   | TGM2_ITGB3    |
| 7309 JUND   | THBS1   | ITGB3   | THBS1_ITGB3   |
| 7310 SP1    | FN1     | ITGB3   | FN1_ITGB3     |
| 7311 SP1    | TGM2    | ITGB3   | TGM2_ITGB3    |
| 7312 SP1    | THBS1   | ITGB3   | THBS1_ITGB3   |
| 7313 FOSL1  | FN1     | ITGB3   | FN1_ITGB3     |
| 7314 FOSL1  | TGM2    | ITGB3   | TGM2_ITGB3    |
| 7315 FOSL1  | THBS1   | ITGB3   | THBS1_ITGB3   |
| 7316 HOXA10 | FN1     | ITGB3   | FN1_ITGB3     |
| 7317 HOXA10 | TGM2    | ITGB3   | TGM2_ITGB3    |
| 7318 HOXA10 | THBS1   | ITGB3   | THBS1_ITGB3   |
| 7319 ETS1   | FN1     | ITGB3   | FN1_ITGB3     |
| 7320 ETS1   | TGM2    | ITGB3   | TGM2_ITGB3    |
| 7321 ETS1   | THBS1   | ITGB3   | THBS1_ITGB3   |
| 7322 HOXD3  | FN1     | ITGB3   | FN1_ITGB3     |
| 7323 HOXD3  | TGM2    | ITGB3   | TGM2_ITGB3    |
| 7324 HOXD3  | THBS1   | ITGB3   | THBS1_ITGB3   |
| 7325 MAF    | FN1     | ITGB7   | FN1_ITGB7     |
| 7326 MAF    | VCAM1   | ITGB7   | VCAM1_ITGB7   |
| 7327 JUN    | FN1     | ITGB8   | FN1_ITGB8     |
| 7328 JUN    | VTN     | ITGB8   | VTN_ITGB8     |
| 7329 JUN    | TGFB1   | ITGB8   | TGFB1_ITGB8   |
| 7330 JUN    | LAMA1   | ITGB8   | LAMA1_ITGB8   |
| 7331 JUN    | COL4A1  | ITGB8   | COL4A1_ITGB8  |
| 7332 ATF2   | VTN     | ITGB8   | VTN_ITGB8     |
| 7333 ATF2   | TGFB1   | ITGB8   | TGFB1_ITGB8   |
| 7334 ATF2   | LAMA1   | ITGB8   | LAMA1_ITGB8   |
| 7335 ATF2   | COL4A1  | ITGB8   | COL4A1_ITGB8  |
| 7336 REST   | CALM1   | KCNN4   | CALM1_KCNN4   |
| 7337 REST   | CALM3   | KCNQ3   | CALM3_KCNQ3   |
| 7338 REST   | CALM2   | KCNQ3   | CALM2_KCNQ3   |
| 7339 REST   | CALM1   | KCNQ3   | CALM1_KCNQ3   |
| 7340 SP1    | CALM3   | KCNQ3   | CALM3_KCNQ3   |
| 7341 SP1    | CALM2   | KCNQ3   | CALM2_KCNQ3   |
| 7342 SP1    | CALM1   | KCNQ3   | CALM1_KCNQ3   |
| 7343 SP4    | VEGFA   | KDR     | VEGFA_KDR     |
| 7344 NANOG  | VEGFA   | KDR     | VEGFA_KDR     |
| 7345 HEY1   | VEGFA   | KDR     | VEGFA_KDR     |
| 7346 DNMT1  | HLA-A   | KIR2DL3 | HLA-A_KIR2DL3 |
| 7347 DNMT1  | B2M     | KIR2DL3 | B2M_KIR2DL3   |
| 7348 DNMT1  | HLA-C   | KIR2DL3 | HLA-C_KIR2DL3 |
| 7349 DNMT1  | HLA-B   | KIR2DL3 | HLA-B_KIR2DL3 |
| 7350 E2F1   | HLA-C   | KIR3DL1 | HLA-C_KIR3DL1 |
| 7351 E2F1   | B2M     | KIR3DL1 | B2M_KIR3DL1   |
| 7352 E2F1   | HLA-A   | KIR3DL1 | HLA-A_KIR3DL1 |
| 7353 E2F1   | HLA-B   | KIR3DL1 | HLA-B_KIR3DL1 |
| 7354 E2F1   | HLA-E   | KIR3DL1 | HLA-E_KIR3DL1 |
| 7355 YY1    | HLA-C   | KIR3DL1 | HLA-C_KIR3DL1 |
| 7356 YY1    | B2M     | KIR3DL1 | B2M_KIR3DL1   |
| 7357 YY1    | HLA-A   | KIR3DL1 | HLA-A_KIR3DL1 |
| 7358 YY1    | HLA-B   | KIR3DL1 | HLA-B_KIR3DL1 |
| 7359 YY1    | HLA-E   | KIR3DL1 | HLA-E_KIR3DL1 |
| 7360 TFAP2A | KITLG   | KIT     | KITLG_KIT     |
| 7361 TFAP2A | CLEC11A | KIT     | CLEC11A_KIT   |
| 7362 MITF   | KITLG   | KIT     | KITLG_KIT     |
| 7363 MITF   | CLEC11A | KIT     | CLEC11A_KIT   |
| 7364 SP1    | KITLG   | KIT     | KITLG_KIT     |
| 7365 SP1    | CLEC11A | KIT     | CLEC11A_KIT   |

|             |          |        |               |
|-------------|----------|--------|---------------|
| 7366 RBMX   | KITLG    | KIT    | KITLG_KIT     |
| 7367 RBMX   | CLEC11A  | KIT    | CLEC11A_KIT   |
| 7368 EGR1   | APOE     | LDLR   | APOE_LDLR     |
| 7369 YY1    | APOE     | LDLR   | APOE_LDLR     |
| 7370 SREBF2 | APOE     | LDLR   | APOE_LDLR     |
| 7371 SREBF1 | APOE     | LDLR   | APOE_LDLR     |
| 7372 ATF3   | APOE     | LDLR   | APOE_LDLR     |
| 7373 HNF4A  | APOE     | LDLR   | APOE_LDLR     |
| 7374 KLF13  | APOE     | LDLR   | APOE_LDLR     |
| 7375 NR2C2  | GNAI2    | LHCGR  | GNAI2_LHCGR   |
| 7376 NR2C2  | GNAS     | LHCGR  | GNAS_LHCGR    |
| 7377 NR2F6  | GNAI2    | LHCGR  | GNAI2_LHCGR   |
| 7378 NR2F6  | GNAS     | LHCGR  | GNAS_LHCGR    |
| 7379 NR2F1  | GNAI2    | LHCGR  | GNAI2_LHCGR   |
| 7380 NR2F1  | GNAS     | LHCGR  | GNAS_LHCGR    |
| 7381 TRERF1 | HLA-G    | LILRB1 | HLA-G_LILRB1  |
| 7382 TRERF1 | B2M      | LILRB1 | B2M_LILRB1    |
| 7383 TRERF1 | HLA-A    | LILRB1 | HLA-A_LILRB1  |
| 7384 TRERF1 | HLA-C    | LILRB1 | HLA-C_LILRB1  |
| 7385 TRERF1 | HLA-B    | LILRB1 | HLA-B_LILRB1  |
| 7386 TRERF1 | HLA-C    | LILRB2 | HLA-C_LILRB2  |
| 7387 TRERF1 | B2M      | LILRB2 | B2M_LILRB2    |
| 7388 TRERF1 | HLA-B    | LILRB2 | HLA-B_LILRB2  |
| 7389 TRERF1 | HLA-G    | LILRB2 | HLA-G_LILRB2  |
| 7390 TRERF1 | HLA-A    | LILRB2 | HLA-A_LILRB2  |
| 7391 SREBF2 | PLAT     | LRP1   | PLAT_LRP1     |
| 7392 SREBF2 | CTGF     | LRP1   | CTGF_LRP1     |
| 7393 SREBF2 | MDK      | LRP1   | MDK_LRP1      |
| 7394 SREBF2 | C3       | LRP1   | C3_LRP1       |
| 7395 SREBF2 | APP      | LRP1   | APP_LRP1      |
| 7396 SREBF2 | LTF      | LRP1   | LTF_LRP1      |
| 7397 SREBF2 | SERPINE2 | LRP1   | SERPINE2_LRP1 |
| 7398 SREBF2 | MMP9     | LRP1   | MMP9_LRP1     |
| 7399 SREBF2 | C4BPA    | LRP1   | C4BPA_LRP1    |
| 7400 SREBF2 | SERPING1 | LRP1   | SERPING1_LRP1 |
| 7401 SREBF2 | SERPINA1 | LRP1   | SERPINA1_LRP1 |
| 7402 SREBF2 | APOE     | LRP1   | APOE_LRP1     |
| 7403 SREBF2 | A2M      | LRP1   | A2M_LRP1      |
| 7404 SREBF2 | F8       | LRP1   | F8_LRP1       |
| 7405 SREBF2 | TFPI     | LRP1   | TFPI_LRP1     |
| 7406 SREBF2 | SERPINC1 | LRP1   | SERPINC1_LRP1 |
| 7407 SREBF2 | C1QB     | LRP1   | C1QB_LRP1     |
| 7408 SREBF2 | HSP90B1  | LRP1   | HSP90B1_LRP1  |
| 7409 SREBF2 | WNT3A    | LRP1   | WNT3A_LRP1    |
| 7410 SREBF2 | THBS1    | LRP1   | THBS1_LRP1    |
| 7411 SREBF2 | MMP13    | LRP1   | MMP13_LRP1    |
| 7412 SREBF2 | LRPAP1   | LRP1   | LRPAP1_LRP1   |
| 7413 SREBF2 | LPL      | LRP1   | LPL_LRP1      |
| 7414 SREBF2 | F9       | LRP1   | F9_LRP1       |
| 7415 SREBF2 | CALR     | LRP1   | CALR_LRP1     |
| 7416 SREBF2 | FCN2     | LRP1   | FCN2_LRP1     |
| 7417 SREBF2 | SERPINE1 | LRP1   | SERPINE1_LRP1 |
| 7418 SREBF2 | PDGFB    | LRP1   | PDGFB_LRP1    |
| 7419 SREBF2 | PLAU     | LRP1   | PLAU_LRP1     |
| 7420 SREBF2 | PSAP     | LRP1   | PSAP_LRP1     |
| 7421 SREBF1 | PLAT     | LRP1   | PLAT_LRP1     |
| 7422 SREBF1 | CTGF     | LRP1   | CTGF_LRP1     |
| 7423 SREBF1 | MDK      | LRP1   | MDK_LRP1      |



|             |          |      |               |
|-------------|----------|------|---------------|
| 7424 SREBF1 | C3       | LRP1 | C3_LRP1       |
| 7425 SREBF1 | APP      | LRP1 | APP_LRP1      |
| 7426 SREBF1 | LTF      | LRP1 | LTF_LRP1      |
| 7427 SREBF1 | SERPINE2 | LRP1 | SERPINE2_LRP1 |
| 7428 SREBF1 | MMP9     | LRP1 | MMP9_LRP1     |
| 7429 SREBF1 | LIPC     | LRP1 | LIPC_LRP1     |
| 7430 SREBF1 | C4BPA    | LRP1 | C4BPA_LRP1    |
| 7431 SREBF1 | SERPING1 | LRP1 | SERPING1_LRP1 |
| 7432 SREBF1 | SERPINA1 | LRP1 | SERPINA1_LRP1 |
| 7433 SREBF1 | APOE     | LRP1 | APOE_LRP1     |
| 7434 SREBF1 | A2M      | LRP1 | A2M_LRP1      |
| 7435 SREBF1 | F8       | LRP1 | F8_LRP1       |
| 7436 SREBF1 | TFPI     | LRP1 | TFPI_LRP1     |
| 7437 SREBF1 | SERPINC1 | LRP1 | SERPINC1_LRP1 |
| 7438 SREBF1 | C1QB     | LRP1 | C1QB_LRP1     |
| 7439 SREBF1 | HSP90B1  | LRP1 | HSP90B1_LRP1  |
| 7440 SREBF1 | WNT3A    | LRP1 | WNT3A_LRP1    |
| 7441 SREBF1 | THBS1    | LRP1 | THBS1_LRP1    |
| 7442 SREBF1 | MMP13    | LRP1 | MMP13_LRP1    |
| 7443 SREBF1 | LRPAP1   | LRP1 | LRPAP1_LRP1   |
| 7444 SREBF1 | LPL      | LRP1 | LPL_LRP1      |
| 7445 SREBF1 | F9       | LRP1 | F9_LRP1       |
| 7446 SREBF1 | CALR     | LRP1 | CALR_LRP1     |
| 7447 SREBF1 | FCN2     | LRP1 | FCN2_LRP1     |
| 7448 SREBF1 | SERPINE1 | LRP1 | SERPINE1_LRP1 |
| 7449 SREBF1 | PDGFB    | LRP1 | PDGFB_LRP1    |
| 7450 SREBF1 | PLAU     | LRP1 | PLAU_LRP1     |
| 7451 SREBF1 | PSAP     | LRP1 | PSAP_LRP1     |
| 7452 KLF15  | THBS1    | LRP5 | THBS1_LRP5    |
| 7453 KLF15  | APOE     | LRP5 | APOE_LRP5     |
| 7454 SP1    | THBS1    | LRP5 | THBS1_LRP5    |
| 7455 RUNX2  | THBS1    | LRP5 | THBS1_LRP5    |
| 7456 RUNX2  | APOE     | LRP5 | APOE_LRP5     |
| 7457 HIC1   | APOE     | LRP8 | APOE_LRP8     |
| 7458 WWTR1  | LTB      | LTBR | LTB_LTBR      |
| 7459 WWTR1  | LTA      | LTBR | LTA_LTBR      |
| 7460 WWTR1  | TNF      | LTBR | TNF_LTBR      |
| 7461 WWTR1  | TNFSF14  | LTBR | TNFSF14_LTBR  |
| 7462 CREB5  | SFTPD    | LY96 | SFTPD_LY96    |
| 7463 CREB5  | BGN      | LY96 | BGN_LY96      |
| 7464 STAT1  | SFTPD    | LY96 | SFTPD_LY96    |
| 7465 STAT1  | BGN      | LY96 | BGN_LY96      |
| 7466 PAX5   | DCN      | MET  | DCN_MET       |
| 7467 PAX5   | HGF      | MET  | HGF_MET       |
| 7468 PAX5   | SEMA5A   | MET  | SEMA5A_MET    |
| 7469 PAX5   | SEMA4D   | MET  | SEMA4D_MET    |
| 7470 SP1    | DCN      | MET  | DCN_MET       |
| 7471 SP1    | SEMA5A   | MET  | SEMA5A_MET    |
| 7472 SP1    | SEMA4D   | MET  | SEMA4D_MET    |
| 7473 PAX3   | DCN      | MET  | DCN_MET       |
| 7474 PAX3   | HGF      | MET  | HGF_MET       |
| 7475 PAX3   | SEMA5A   | MET  | SEMA5A_MET    |
| 7476 PAX3   | SEMA4D   | MET  | SEMA4D_MET    |
| 7477 YBX1   | DCN      | MET  | DCN_MET       |
| 7478 YBX1   | HGF      | MET  | HGF_MET       |
| 7479 YBX1   | SEMA5A   | MET  | SEMA5A_MET    |
| 7480 YBX1   | SEMA4D   | MET  | SEMA4D_MET    |
| 7481 MITF   | DCN      | MET  | DCN_MET       |

|      |       |        |        |              |
|------|-------|--------|--------|--------------|
| 7482 | MITF  | HGF    | MET    | HGF_MET      |
| 7483 | MITF  | SEMA5A | MET    | SEMA5A_MET   |
| 7484 | MITF  | SEMA4D | MET    | SEMA4D_MET   |
| 7485 | TP53  | DCN    | MET    | DCN_MET      |
| 7486 | TP53  | HGF    | MET    | HGF_MET      |
| 7487 | TP53  | SEMA5A | MET    | SEMA5A_MET   |
| 7488 | TP53  | SEMA4D | MET    | SEMA4D_MET   |
| 7489 | SMAD7 | DCN    | MET    | DCN_MET      |
| 7490 | SMAD7 | HGF    | MET    | HGF_MET      |
| 7491 | SMAD7 | SEMA5A | MET    | SEMA5A_MET   |
| 7492 | SMAD7 | SEMA4D | MET    | SEMA4D_MET   |
| 7493 | PAX6  | DCN    | MET    | DCN_MET      |
| 7494 | PAX6  | HGF    | MET    | HGF_MET      |
| 7495 | PAX6  | SEMA5A | MET    | SEMA5A_MET   |
| 7496 | PAX6  | SEMA4D | MET    | SEMA4D_MET   |
| 7497 | FOXP2 | DCN    | MET    | DCN_MET      |
| 7498 | FOXP2 | HGF    | MET    | HGF_MET      |
| 7499 | FOXP2 | SEMA5A | MET    | SEMA5A_MET   |
| 7500 | FOXP2 | SEMA4D | MET    | SEMA4D_MET   |
| 7501 | HIF1A | DCN    | MET    | DCN_MET      |
| 7502 | HIF1A | HGF    | MET    | HGF_MET      |
| 7503 | HIF1A | SEMA5A | MET    | SEMA5A_MET   |
| 7504 | HIF1A | SEMA4D | MET    | SEMA4D_MET   |
| 7505 | PITX3 | CALM1  | MIP    | CALM1_MIP    |
| 7506 | MYCN  | APP    | NGFR   | APP_NGFR     |
| 7507 | MYCN  | RTN4   | NGFR   | RTN4_NGFR    |
| 7508 | KLF5  | UBA52  | NOTCH1 | UBA52_NOTCH1 |
| 7509 | SIRT1 | UBA52  | NOTCH1 | UBA52_NOTCH1 |
| 7510 | PPARG | HLA-C  | NOTCH4 | HLA-C_NOTCH4 |
| 7511 | REST  | VEGFA  | NRP1   | VEGFA_NRP1   |
| 7512 | TCF4  | SYTL3  | NRXN1  | SYTL3_NRXN1  |
| 7513 | HNF1A | LAMA1  | NT5E   | LAMA1_NT5E   |
| 7514 | HNF1A | FN1    | NT5E   | FN1_NT5E     |
| 7515 | HNF1A | TNC    | NT5E   | TNC_NT5E     |
| 7516 | LEF1  | LAMA1  | NT5E   | LAMA1_NT5E   |
| 7517 | LEF1  | FN1    | NT5E   | FN1_NT5E     |
| 7518 | LEF1  | TNC    | NT5E   | TNC_NT5E     |
| 7519 | HIF1A | LAMA1  | NT5E   | LAMA1_NT5E   |
| 7520 | HIF1A | FN1    | NT5E   | FN1_NT5E     |
| 7521 | HIF1A | TNC    | NT5E   | TNC_NT5E     |
| 7522 | SP1   | FN1    | NT5E   | FN1_NT5E     |
| 7523 | HR    | CRP    | OLR1   | CRP_OLR1     |
| 7524 | HR    | APOB   | OLR1   | APOB_OLR1    |
| 7525 | NFKB1 | APOB   | OLR1   | APOB_OLR1    |
| 7526 | RELA  | APOB   | OLR1   | APOB_OLR1    |
| 7527 | JUN   | CALM1  | OPRM1  | CALM1_OPRM1  |
| 7528 | JUN   | GNAI2  | OPRM1  | GNAI2_OPRM1  |
| 7529 | SP3   | CALM1  | OPRM1  | CALM1_OPRM1  |
| 7530 | SP3   | GNAI2  | OPRM1  | GNAI2_OPRM1  |
| 7531 | STAT6 | CALM1  | OPRM1  | CALM1_OPRM1  |
| 7532 | STAT6 | GNAI2  | OPRM1  | GNAI2_OPRM1  |
| 7533 | NFKB1 | CALM1  | OPRM1  | CALM1_OPRM1  |
| 7534 | NFKB1 | GNAI2  | OPRM1  | GNAI2_OPRM1  |
| 7535 | REST  | CALM1  | OPRM1  | CALM1_OPRM1  |
| 7536 | REST  | GNAI2  | OPRM1  | GNAI2_OPRM1  |
| 7537 | STAT3 | CALM1  | OPRM1  | CALM1_OPRM1  |
| 7538 | STAT3 | GNAI2  | OPRM1  | GNAI2_OPRM1  |
| 7539 | YY1   | CALM1  | OPRM1  | CALM1_OPRM1  |

|            |          |       |                |
|------------|----------|-------|----------------|
| 7540 YY1   | GNAI2    | OPRM1 | GNAI2_OPRM1    |
| 7541 STAT1 | CALM1    | OPRM1 | CALM1_OPRM1    |
| 7542 STAT1 | GNAI2    | OPRM1 | GNAI2_OPRM1    |
| 7543 SP1   | CALM1    | OPRM1 | CALM1_OPRM1    |
| 7544 SP1   | GNAI2    | OPRM1 | GNAI2_OPRM1    |
| 7545 RELA  | VTN      | PLAUR | VTN_PLAUR      |
| 7546 RELA  | FGA      | PLAUR | FGA_PLAUR      |
| 7547 RELA  | LRP1B    | PLAUR | LRP1B_PLAUR    |
| 7548 RELA  | KNG1     | PLAUR | KNG1_PLAUR     |
| 7549 RELA  | PLG      | PLAUR | PLG_PLAUR      |
| 7550 JUN   | VTN      | PLAUR | VTN_PLAUR      |
| 7551 JUN   | FGA      | PLAUR | FGA_PLAUR      |
| 7552 JUN   | LRP1B    | PLAUR | LRP1B_PLAUR    |
| 7553 JUN   | FN1      | PLAUR | FN1_PLAUR      |
| 7554 JUN   | KNG1     | PLAUR | KNG1_PLAUR     |
| 7555 JUN   | PLG      | PLAUR | PLG_PLAUR      |
| 7556 JUN   | SERPINE1 | PLAUR | SERPINE1_PLAUR |
| 7557 SP3   | MMP12    | PLAUR | MMP12_PLAUR    |
| 7558 SP3   | PLAU     | PLAUR | PLAU_PLAUR     |
| 7559 SP3   | VTN      | PLAUR | VTN_PLAUR      |
| 7560 SP3   | FGA      | PLAUR | FGA_PLAUR      |
| 7561 SP3   | LRP1B    | PLAUR | LRP1B_PLAUR    |
| 7562 SP3   | FN1      | PLAUR | FN1_PLAUR      |
| 7563 SP3   | KNG1     | PLAUR | KNG1_PLAUR     |
| 7564 SP3   | PLG      | PLAUR | PLG_PLAUR      |
| 7565 SP3   | SERPINE1 | PLAUR | SERPINE1_PLAUR |
| 7566 NFKB1 | MMP12    | PLAUR | MMP12_PLAUR    |
| 7567 NFKB1 | VTN      | PLAUR | VTN_PLAUR      |
| 7568 NFKB1 | FGA      | PLAUR | FGA_PLAUR      |
| 7569 NFKB1 | LRP1B    | PLAUR | LRP1B_PLAUR    |
| 7570 NFKB1 | KNG1     | PLAUR | KNG1_PLAUR     |
| 7571 NFKB1 | PLG      | PLAUR | PLG_PLAUR      |
| 7572 SPDEF | MMP12    | PLAUR | MMP12_PLAUR    |
| 7573 SPDEF | PLAU     | PLAUR | PLAU_PLAUR     |
| 7574 SPDEF | VTN      | PLAUR | VTN_PLAUR      |
| 7575 SPDEF | FGA      | PLAUR | FGA_PLAUR      |
| 7576 SPDEF | LRP1B    | PLAUR | LRP1B_PLAUR    |
| 7577 SPDEF | FN1      | PLAUR | FN1_PLAUR      |
| 7578 SPDEF | KNG1     | PLAUR | KNG1_PLAUR     |
| 7579 SPDEF | PLG      | PLAUR | PLG_PLAUR      |
| 7580 SPDEF | SERPINE1 | PLAUR | SERPINE1_PLAUR |
| 7581 EGR1  | MMP12    | PLAUR | MMP12_PLAUR    |
| 7582 EGR1  | VTN      | PLAUR | VTN_PLAUR      |
| 7583 EGR1  | FGA      | PLAUR | FGA_PLAUR      |
| 7584 EGR1  | LRP1B    | PLAUR | LRP1B_PLAUR    |
| 7585 EGR1  | KNG1     | PLAUR | KNG1_PLAUR     |
| 7586 EGR1  | PLG      | PLAUR | PLG_PLAUR      |
| 7587 EGR1  | SERPINE1 | PLAUR | SERPINE1_PLAUR |
| 7588 SP1   | MMP12    | PLAUR | MMP12_PLAUR    |
| 7589 SP1   | VTN      | PLAUR | VTN_PLAUR      |
| 7590 SP1   | FGA      | PLAUR | FGA_PLAUR      |
| 7591 SP1   | LRP1B    | PLAUR | LRP1B_PLAUR    |
| 7592 SP1   | FN1      | PLAUR | FN1_PLAUR      |
| 7593 SP1   | KNG1     | PLAUR | KNG1_PLAUR     |
| 7594 SP1   | PLG      | PLAUR | PLG_PLAUR      |
| 7595 FOXP2 | MMP12    | PLAUR | MMP12_PLAUR    |
| 7596 FOXP2 | PLAU     | PLAUR | PLAU_PLAUR     |
| 7597 FOXP2 | VTN      | PLAUR | VTN_PLAUR      |

|      |        |          |       |                |
|------|--------|----------|-------|----------------|
| 7598 | FOXP2  | FGA      | PLAUR | FGA_PLAUR      |
| 7599 | FOXP2  | LRP1B    | PLAUR | LRP1B_PLAUR    |
| 7600 | FOXP2  | FN1      | PLAUR | FN1_PLAUR      |
| 7601 | FOXP2  | KNG1     | PLAUR | KNG1_PLAUR     |
| 7602 | FOXP2  | PLG      | PLAUR | PLG_PLAUR      |
| 7603 | FOXP2  | SERPINE1 | PLAUR | SERPINE1_PLAUR |
| 7604 | ATF1   | MMP12    | PLAUR | MMP12_PLAUR    |
| 7605 | ATF1   | PLAU     | PLAUR | PLAU_PLAUR     |
| 7606 | ATF1   | VTN      | PLAUR | VTN_PLAUR      |
| 7607 | ATF1   | FGA      | PLAUR | FGA_PLAUR      |
| 7608 | ATF1   | LRP1B    | PLAUR | LRP1B_PLAUR    |
| 7609 | ATF1   | FN1      | PLAUR | FN1_PLAUR      |
| 7610 | ATF1   | KNG1     | PLAUR | KNG1_PLAUR     |
| 7611 | ATF1   | PLG      | PLAUR | PLG_PLAUR      |
| 7612 | ATF1   | SERPINE1 | PLAUR | SERPINE1_PLAUR |
| 7613 | FOS    | MMP12    | PLAUR | MMP12_PLAUR    |
| 7614 | FOS    | VTN      | PLAUR | VTN_PLAUR      |
| 7615 | FOS    | FGA      | PLAUR | FGA_PLAUR      |
| 7616 | FOS    | LRP1B    | PLAUR | LRP1B_PLAUR    |
| 7617 | FOS    | FN1      | PLAUR | FN1_PLAUR      |
| 7618 | FOS    | KNG1     | PLAUR | KNG1_PLAUR     |
| 7619 | FOS    | PLG      | PLAUR | PLG_PLAUR      |
| 7620 | FOS    | SERPINE1 | PLAUR | SERPINE1_PLAUR |
| 7621 | FOSL2  | MMP12    | PLAUR | MMP12_PLAUR    |
| 7622 | FOSL2  | PLAU     | PLAUR | PLAU_PLAUR     |
| 7623 | FOSL2  | VTN      | PLAUR | VTN_PLAUR      |
| 7624 | FOSL2  | FGA      | PLAUR | FGA_PLAUR      |
| 7625 | FOSL2  | LRP1B    | PLAUR | LRP1B_PLAUR    |
| 7626 | FOSL2  | FN1      | PLAUR | FN1_PLAUR      |
| 7627 | FOSL2  | KNG1     | PLAUR | KNG1_PLAUR     |
| 7628 | FOSL2  | PLG      | PLAUR | PLG_PLAUR      |
| 7629 | FOSL2  | SERPINE1 | PLAUR | SERPINE1_PLAUR |
| 7630 | TFAP2A | MMP12    | PLAUR | MMP12_PLAUR    |
| 7631 | TFAP2A | PLAU     | PLAUR | PLAU_PLAUR     |
| 7632 | TFAP2A | VTN      | PLAUR | VTN_PLAUR      |
| 7633 | TFAP2A | FGA      | PLAUR | FGA_PLAUR      |
| 7634 | TFAP2A | LRP1B    | PLAUR | LRP1B_PLAUR    |
| 7635 | TFAP2A | FN1      | PLAUR | FN1_PLAUR      |
| 7636 | TFAP2A | KNG1     | PLAUR | KNG1_PLAUR     |
| 7637 | TFAP2A | PLG      | PLAUR | PLG_PLAUR      |
| 7638 | TFAP2A | SERPINE1 | PLAUR | SERPINE1_PLAUR |
| 7639 | ETV4   | MMP12    | PLAUR | MMP12_PLAUR    |
| 7640 | ETV4   | PLAU     | PLAUR | PLAU_PLAUR     |
| 7641 | ETV4   | VTN      | PLAUR | VTN_PLAUR      |
| 7642 | ETV4   | FGA      | PLAUR | FGA_PLAUR      |
| 7643 | ETV4   | LRP1B    | PLAUR | LRP1B_PLAUR    |
| 7644 | ETV4   | FN1      | PLAUR | FN1_PLAUR      |
| 7645 | ETV4   | KNG1     | PLAUR | KNG1_PLAUR     |
| 7646 | ETV4   | PLG      | PLAUR | PLG_PLAUR      |
| 7647 | ETV4   | SERPINE1 | PLAUR | SERPINE1_PLAUR |
| 7648 | FOSL1  | MMP12    | PLAUR | MMP12_PLAUR    |
| 7649 | FOSL1  | PLAU     | PLAUR | PLAU_PLAUR     |
| 7650 | FOSL1  | VTN      | PLAUR | VTN_PLAUR      |
| 7651 | FOSL1  | FGA      | PLAUR | FGA_PLAUR      |
| 7652 | FOSL1  | LRP1B    | PLAUR | LRP1B_PLAUR    |
| 7653 | FOSL1  | FN1      | PLAUR | FN1_PLAUR      |
| 7654 | FOSL1  | KNG1     | PLAUR | KNG1_PLAUR     |
| 7655 | FOSL1  | PLG      | PLAUR | PLG_PLAUR      |

|             |          |        |                |
|-------------|----------|--------|----------------|
| 7656 FOSL1  | SERPINE1 | PLAUR  | SERPINE1_PLAUR |
| 7657 JUND   | MMP12    | PLAUR  | MMP12_PLAUR    |
| 7658 JUND   | PLAU     | PLAUR  | PLAU_PLAUR     |
| 7659 JUND   | VTN      | PLAUR  | VTN_PLAUR      |
| 7660 JUND   | FGA      | PLAUR  | FGA_PLAUR      |
| 7661 JUND   | LRP1B    | PLAUR  | LRP1B_PLAUR    |
| 7662 JUND   | FN1      | PLAUR  | FN1_PLAUR      |
| 7663 JUND   | KNG1     | PLAUR  | KNG1_PLAUR     |
| 7664 JUND   | PLG      | PLAUR  | PLG_PLAUR      |
| 7665 JUND   | SERPINE1 | PLAUR  | SERPINE1_PLAUR |
| 7666 SPI1   | GNAS     | PTGIR  | GNAS_PTGIR     |
| 7667 POU2F1 | GNAS     | PTGIR  | GNAS_PTGIR     |
| 7668 SP1    | GNAS     | PTGIR  | GNAS_PTGIR     |
| 7669 TFAP2C | VEGFA    | RET    | VEGFA_RET      |
| 7670 FOXA1  | VEGFA    | RET    | VEGFA_RET      |
| 7671 SOX10  | VEGFA    | RET    | VEGFA_RET      |
| 7672 NKX2-1 | VEGFA    | RET    | VEGFA_RET      |
| 7673 STAT3  | GNAI2    | S1PR1  | GNAI2_S1PR1    |
| 7674 STAT3  | SPP1     | S1PR1  | SPP1_S1PR1     |
| 7675 STAT2  | SAA1     | SCARB1 | SAA1_SCARB1    |
| 7676 STAT2  | APOE     | SCARB1 | APOE_SCARB1    |
| 7677 STAT2  | THBS1    | SCARB1 | THBS1_SCARB1   |
| 7678 STAT1  | SAA1     | SCARB1 | SAA1_SCARB1    |
| 7679 STAT1  | APOE     | SCARB1 | APOE_SCARB1    |
| 7680 STAT1  | THBS1    | SCARB1 | THBS1_SCARB1   |
| 7681 NR1H4  | SAA1     | SCARB1 | SAA1_SCARB1    |
| 7682 NR1H4  | APOE     | SCARB1 | APOE_SCARB1    |
| 7683 NR1H4  | THBS1    | SCARB1 | THBS1_SCARB1   |
| 7684 SPI1   | SAA1     | SCARB1 | SAA1_SCARB1    |
| 7685 SPI1   | APOE     | SCARB1 | APOE_SCARB1    |
| 7686 SPI1   | THBS1    | SCARB1 | THBS1_SCARB1   |
| 7687 ZNF444 | CALR     | SCARF1 | CALR_SCARF1    |
| 7688 SP3    | CALM1    | SCTR   | CALM1_SCTR     |
| 7689 SP1    | CALM1    | SCTR   | CALM1_SCTR     |
| 7690 RELA   | HSPG2    | SDC1   | HSPG2_SDC1     |
| 7691 RELA   | THBS1    | SDC1   | THBS1_SDC1     |
| 7692 RELA   | PTN      | SDC1   | PTN_SDC1       |
| 7693 RELA   | HMGB1    | SDC1   | HMGB1_SDC1     |
| 7694 RELA   | IL8      | SDC1   | IL8_SDC1       |
| 7695 RELA   | LAMA5    | SDC1   | LAMA5_SDC1     |
| 7696 RELA   | MDK      | SDC1   | MDK_SDC1       |
| 7697 RELA   | SLIT2    | SDC1   | SLIT2_SDC1     |
| 7698 RELA   | SLIT1    | SDC1   | SLIT1_SDC1     |
| 7699 RELA   | HGF      | SDC1   | HGF_SDC1       |
| 7700 RELA   | FGF2     | SDC1   | FGF2_SDC1      |
| 7701 RELA   | LACRT    | SDC1   | LACRT_SDC1     |
| 7702 NFKB1  | HSPG2    | SDC1   | HSPG2_SDC1     |
| 7703 NFKB1  | THBS1    | SDC1   | THBS1_SDC1     |
| 7704 NFKB1  | PTN      | SDC1   | PTN_SDC1       |
| 7705 NFKB1  | HMGB1    | SDC1   | HMGB1_SDC1     |
| 7706 NFKB1  | IL8      | SDC1   | IL8_SDC1       |
| 7707 NFKB1  | LAMA5    | SDC1   | LAMA5_SDC1     |
| 7708 NFKB1  | MDK      | SDC1   | MDK_SDC1       |
| 7709 NFKB1  | SLIT2    | SDC1   | SLIT2_SDC1     |
| 7710 NFKB1  | SLIT1    | SDC1   | SLIT1_SDC1     |
| 7711 NFKB1  | HGF      | SDC1   | HGF_SDC1       |
| 7712 NFKB1  | FGF2     | SDC1   | FGF2_SDC1      |
| 7713 NFKB1  | LACRT    | SDC1   | LACRT_SDC1     |

|      |        |          |        |               |
|------|--------|----------|--------|---------------|
| 7714 | POU2F1 | ADAM12   | SDC4   | ADAM12_SDC4   |
| 7715 | POU2F1 | MDK      | SDC4   | MDK_SDC4      |
| 7716 | POU2F1 | FGF2     | SDC4   | FGF2_SDC4     |
| 7717 | POU2F1 | LAMA1    | SDC4   | LAMA1_SDC4    |
| 7718 | POU2F1 | TFPI     | SDC4   | TFPI_SDC4     |
| 7719 | POU2F1 | TNC      | SDC4   | TNC_SDC4      |
| 7720 | POU2F1 | TGM2     | SDC4   | TGM2_SDC4     |
| 7721 | POU2F1 | CXCL10   | SDC4   | CXCL10_SDC4   |
| 7722 | POU2F1 | THBS1    | SDC4   | THBS1_SDC4    |
| 7723 | POU2F1 | CXCL12   | SDC4   | CXCL12_SDC4   |
| 7724 | POU2F1 | RSPO3    | SDC4   | RSPO3_SDC4    |
| 7725 | POU2F1 | FGF6     | SDC4   | FGF6_SDC4     |
| 7726 | POU2F1 | CCL5     | SDC4   | CCL5_SDC4     |
| 7727 | NFKB1  | SERPING1 | SELE   | SERPING1_SELE |
| 7728 | NFKB1  | SELPLG   | SELE   | SELPLG_SELE   |
| 7729 | REL    | SERPING1 | SELE   | SERPING1_SELE |
| 7730 | REL    | SELPLG   | SELE   | SELPLG_SELE   |
| 7731 | RELA   | SERPING1 | SELE   | SERPING1_SELE |
| 7732 | RELA   | SELPLG   | SELE   | SELPLG_SELE   |
| 7733 | HOXA9  | SERPING1 | SELE   | SERPING1_SELE |
| 7734 | HOXA9  | SELPLG   | SELE   | SELPLG_SELE   |
| 7735 | SIRT1  | SERPING1 | SELE   | SERPING1_SELE |
| 7736 | SIRT1  | SELPLG   | SELE   | SELPLG_SELE   |
| 7737 | ATF3   | SERPING1 | SELE   | SERPING1_SELE |
| 7738 | ATF3   | SELPLG   | SELE   | SELPLG_SELE   |
| 7739 | STAT6  | SERPING1 | SELE   | SERPING1_SELE |
| 7740 | STAT6  | SELPLG   | SELE   | SELPLG_SELE   |
| 7741 | KLF2   | PODXL2   | SELL   | PODXL2_SELL   |
| 7742 | KLF2   | VCAN     | SELL   | VCAN_SELL     |
| 7743 | KLF2   | CALM3    | SELL   | CALM3_SELL    |
| 7744 | KLF2   | PODXL    | SELL   | PODXL_SELL    |
| 7745 | KLF2   | MUC7     | SELL   | MUC7_SELL     |
| 7746 | KLF2   | CFH      | SELL   | CFH_SELL      |
| 7747 | KLF2   | CD34     | SELL   | CD34_SELL     |
| 7748 | KLF2   | CALM2    | SELL   | CALM2_SELL    |
| 7749 | KLF2   | SELPLG   | SELL   | SELPLG_SELL   |
| 7750 | KLF2   | CALM1    | SELL   | CALM1_SELL    |
| 7751 | STAT6  | SELPLG   | SELP   | SELPLG_SELP   |
| 7752 | STAT6  | VCAN     | SELP   | VCAN_SELP     |
| 7753 | STAT6  | CD24     | SELP   | CD24_SELP     |
| 7754 | STAT6  | SERPING1 | SELP   | SERPING1_SELP |
| 7755 | NFKB2  | SELPLG   | SELP   | SELPLG_SELP   |
| 7756 | NFKB2  | VCAN     | SELP   | VCAN_SELP     |
| 7757 | NFKB2  | CD24     | SELP   | CD24_SELP     |
| 7758 | NFKB2  | SERPING1 | SELP   | SERPING1_SELP |
| 7759 | ETS1   | TGM2     | TBXA2R | TGM2_TBXA2R   |
| 7760 | ETS1   | GNAI2    | TBXA2R | GNAI2_TBXA2R  |
| 7761 | EGR1   | TGM2     | TBXA2R | TGM2_TBXA2R   |
| 7762 | EGR1   | GNAI2    | TBXA2R | GNAI2_TBXA2R  |
| 7763 | SP1    | TGM2     | TBXA2R | TGM2_TBXA2R   |
| 7764 | SP1    | GNAI2    | TBXA2R | GNAI2_TBXA2R  |
| 7765 | GATA1  | TGM2     | TBXA2R | TGM2_TBXA2R   |
| 7766 | GATA1  | GNAI2    | TBXA2R | GNAI2_TBXA2R  |
| 7767 | NFE2   | TGM2     | TBXA2R | TGM2_TBXA2R   |
| 7768 | NFE2   | GNAI2    | TBXA2R | GNAI2_TBXA2R  |
| 7769 | WT1    | TGM2     | TBXA2R | TGM2_TBXA2R   |
| 7770 | WT1    | GNAI2    | TBXA2R | GNAI2_TBXA2R  |
| 7771 | VHL    | B2M      | TFRC   | B2M_TFRC      |

|            |       |        |              |
|------------|-------|--------|--------------|
| 7772 MYC   | B2M   | TFRC   | B2M_TFRC     |
| 7773 YY1   | B2M   | TFRC   | B2M_TFRC     |
| 7774 HIF1A | B2M   | TFRC   | B2M_TFRC     |
| 7775 WWP1  | GNB3  | TGFBR1 | GNB3_TGFBR1  |
| 7776 WWP1  | TGFB2 | TGFBR1 | TGFB2_TGFBR1 |
| 7777 WWP1  | TGFB1 | TGFBR1 | TGFB1_TGFBR1 |
| 7778 WWP1  | UBA52 | TGFBR1 | UBA52_TGFBR1 |
| 7779 WWP1  | TGFB3 | TGFBR1 | TGFB3_TGFBR1 |
| 7780 WWP1  | CGN   | TGFBR1 | CGN_TGFBR1   |
| 7781 WWP1  | GDF9  | TGFBR1 | GDF9_TGFBR1  |
| 7782 SMAD7 | GNB3  | TGFBR1 | GNB3_TGFBR1  |
| 7783 SMAD7 | TGFB2 | TGFBR1 | TGFB2_TGFBR1 |
| 7784 SMAD7 | UBA52 | TGFBR1 | UBA52_TGFBR1 |
| 7785 SMAD7 | TGFB3 | TGFBR1 | TGFB3_TGFBR1 |
| 7786 SMAD7 | CGN   | TGFBR1 | CGN_TGFBR1   |
| 7787 SMAD7 | GDF9  | TGFBR1 | GDF9_TGFBR1  |
| 7788 EWSR1 | UBA52 | TGFBR2 | UBA52_TGFBR2 |
| 7789 FLI1  | UBA52 | TGFBR2 | UBA52_TGFBR2 |
| 7790 HDAC2 | UBA52 | TGFBR2 | UBA52_TGFBR2 |
| 7791 KLF14 | UBA52 | TGFBR2 | UBA52_TGFBR2 |
| 7792 ETS1  | UBA52 | TGFBR2 | UBA52_TGFBR2 |
| 7793 SP1   | UBA52 | TGFBR2 | UBA52_TGFBR2 |
| 7794 EGR1  | UBA52 | TGFBR2 | UBA52_TGFBR2 |
| 7795 ETV4  | UBA52 | TGFBR2 | UBA52_TGFBR2 |
| 7796 RELA  | F2    | THBD   | F2_THBD      |
| 7797 RELA  | PF4   | THBD   | PF4_THBD     |
| 7798 RELA  | HMGB1 | THBD   | HMGB1_THBD   |
| 7799 RELA  | PROC  | THBD   | PROC_THBD    |
| 7800 NFKB1 | F2    | THBD   | F2_THBD      |
| 7801 NFKB1 | PF4   | THBD   | PF4_THBD     |
| 7802 NFKB1 | HMGB1 | THBD   | HMGB1_THBD   |
| 7803 NFKB1 | PROC  | THBD   | PROC_THBD    |
| 7804 PARP1 | F2    | THBD   | F2_THBD      |
| 7805 PARP1 | PF4   | THBD   | PF4_THBD     |
| 7806 PARP1 | HMGB1 | THBD   | HMGB1_THBD   |
| 7807 PARP1 | PROC  | THBD   | PROC_THBD    |
| 7808 RARB  | F2    | THBD   | F2_THBD      |
| 7809 RARB  | PF4   | THBD   | PF4_THBD     |
| 7810 RARB  | HMGB1 | THBD   | HMGB1_THBD   |
| 7811 RARB  | PROC  | THBD   | PROC_THBD    |
| 7812 RARA  | F2    | THBD   | F2_THBD      |
| 7813 RARA  | PF4   | THBD   | PF4_THBD     |
| 7814 RARA  | HMGB1 | THBD   | HMGB1_THBD   |
| 7815 RARA  | PROC  | THBD   | PROC_THBD    |
| 7816 RXRA  | F2    | THBD   | F2_THBD      |
| 7817 RXRA  | PF4   | THBD   | PF4_THBD     |
| 7818 RXRA  | HMGB1 | THBD   | HMGB1_THBD   |
| 7819 RXRA  | PROC  | THBD   | PROC_THBD    |
| 7820 RARG  | F2    | THBD   | F2_THBD      |
| 7821 RARG  | PF4   | THBD   | PF4_THBD     |
| 7822 RARG  | HMGB1 | THBD   | HMGB1_THBD   |
| 7823 RARG  | PROC  | THBD   | PROC_THBD    |
| 7824 EP300 | F2    | THBD   | F2_THBD      |
| 7825 EP300 | PF4   | THBD   | PF4_THBD     |
| 7826 EP300 | HMGB1 | THBD   | HMGB1_THBD   |
| 7827 EP300 | PROC  | THBD   | PROC_THBD    |
| 7828 SP1   | F2    | THBD   | F2_THBD      |
| 7829 SP1   | PF4   | THBD   | PF4_THBD     |

|      |       |         |      |              |
|------|-------|---------|------|--------------|
| 7830 | SP1   | HMGB1   | THBD | HMGB1_THBD   |
| 7831 | SP1   | PROC    | THBD | PROC_THBD    |
| 7832 | KLF2  | F2      | THBD | F2_THBD      |
| 7833 | KLF2  | PF4     | THBD | PF4_THBD     |
| 7834 | KLF2  | HMGB1   | THBD | HMGB1_THBD   |
| 7835 | KLF2  | PROC    | THBD | PROC_THBD    |
| 7836 | KLF4  | F2      | THBD | F2_THBD      |
| 7837 | KLF4  | PF4     | THBD | PF4_THBD     |
| 7838 | KLF4  | HMGB1   | THBD | HMGB1_THBD   |
| 7839 | KLF4  | PROC    | THBD | PROC_THBD    |
| 7840 | SP1   | SFTPA1  | TLR2 | SFTPA1_TLR2  |
| 7841 | SP1   | HSP90B1 | TLR2 | HSP90B1_TLR2 |
| 7842 | SP1   | ZG16B   | TLR2 | ZG16B_TLR2   |
| 7843 | SP1   | RNASE2  | TLR2 | RNASE2_TLR2  |
| 7844 | SP1   | VCAN    | TLR2 | VCAN_TLR2    |
| 7845 | SP1   | BGN     | TLR2 | BGN_TLR2     |
| 7846 | NFKB1 | HSP90B1 | TLR2 | HSP90B1_TLR2 |
| 7847 | NFKB1 | APOC3   | TLR2 | APOC3_TLR2   |
| 7848 | NFKB1 | ZG16B   | TLR2 | ZG16B_TLR2   |
| 7849 | NFKB1 | RNASE2  | TLR2 | RNASE2_TLR2  |
| 7850 | NFKB1 | HRAS    | TLR2 | HRAS_TLR2    |
| 7851 | NFKB1 | VCAN    | TLR2 | VCAN_TLR2    |
| 7852 | HIF1A | SFTPA1  | TLR2 | SFTPA1_TLR2  |
| 7853 | HIF1A | HSP90B1 | TLR2 | HSP90B1_TLR2 |
| 7854 | HIF1A | APOC3   | TLR2 | APOC3_TLR2   |
| 7855 | HIF1A | ZG16B   | TLR2 | ZG16B_TLR2   |
| 7856 | HIF1A | RNASE2  | TLR2 | RNASE2_TLR2  |
| 7857 | HIF1A | HRAS    | TLR2 | HRAS_TLR2    |
| 7858 | HIF1A | VCAN    | TLR2 | VCAN_TLR2    |
| 7859 | HIF1A | BGN     | TLR2 | BGN_TLR2     |
| 7860 | RELA  | HSP90B1 | TLR2 | HSP90B1_TLR2 |
| 7861 | RELA  | APOC3   | TLR2 | APOC3_TLR2   |
| 7862 | RELA  | ZG16B   | TLR2 | ZG16B_TLR2   |
| 7863 | RELA  | RNASE2  | TLR2 | RNASE2_TLR2  |
| 7864 | RELA  | HRAS    | TLR2 | HRAS_TLR2    |
| 7865 | RELA  | VCAN    | TLR2 | VCAN_TLR2    |
| 7866 | SPI1  | SFTPD   | TLR4 | SFTPD_TLR4   |
| 7867 | SPI1  | BGN     | TLR4 | BGN_TLR4     |
| 7868 | SPI1  | ZG16B   | TLR4 | ZG16B_TLR4   |
| 7869 | SPI1  | HSPA1A  | TLR4 | HSPA1A_TLR4  |
| 7870 | SPI1  | DEFB4A  | TLR4 | DEFB4A_TLR4  |
| 7871 | SPI1  | HSP90B1 | TLR4 | HSP90B1_TLR4 |
| 7872 | SPI1  | S100A9  | TLR4 | S100A9_TLR4  |
| 7873 | SPI1  | S100A8  | TLR4 | S100A8_TLR4  |
| 7874 | STAT6 | SFTPD   | TLR4 | SFTPD_TLR4   |
| 7875 | STAT6 | BGN     | TLR4 | BGN_TLR4     |
| 7876 | STAT6 | ZG16B   | TLR4 | ZG16B_TLR4   |
| 7877 | STAT6 | HSPA1A  | TLR4 | HSPA1A_TLR4  |
| 7878 | STAT6 | DEFB4A  | TLR4 | DEFB4A_TLR4  |
| 7879 | STAT6 | HSP90B1 | TLR4 | HSP90B1_TLR4 |
| 7880 | STAT6 | S100A9  | TLR4 | S100A9_TLR4  |
| 7881 | STAT6 | S100A8  | TLR4 | S100A8_TLR4  |
| 7882 | IRF3  | SFTPD   | TLR4 | SFTPD_TLR4   |
| 7883 | IRF3  | BGN     | TLR4 | BGN_TLR4     |
| 7884 | IRF3  | ZG16B   | TLR4 | ZG16B_TLR4   |
| 7885 | IRF3  | HSPA1A  | TLR4 | HSPA1A_TLR4  |
| 7886 | IRF3  | DEFB4A  | TLR4 | DEFB4A_TLR4  |
| 7887 | IRF3  | HSP90B1 | TLR4 | HSP90B1_TLR4 |



|      |        |         |           |                   |
|------|--------|---------|-----------|-------------------|
| 7888 | IRF3   | S100A9  | TLR4      | S100A9_TLR4       |
| 7889 | IRF3   | S100A8  | TLR4      | S100A8_TLR4       |
| 7890 | IRF8   | SFTPD   | TLR4      | SFTPD_TLR4        |
| 7891 | IRF8   | BGN     | TLR4      | BGN_TLR4          |
| 7892 | IRF8   | ZG16B   | TLR4      | ZG16B_TLR4        |
| 7893 | IRF8   | HSPA1A  | TLR4      | HSPA1A_TLR4       |
| 7894 | IRF8   | DEFB4A  | TLR4      | DEFB4A_TLR4       |
| 7895 | IRF8   | HSP90B1 | TLR4      | HSP90B1_TLR4      |
| 7896 | IRF8   | S100A9  | TLR4      | S100A9_TLR4       |
| 7897 | IRF8   | S100A8  | TLR4      | S100A8_TLR4       |
| 7898 | ZNF160 | SFTPD   | TLR4      | SFTPD_TLR4        |
| 7899 | ZNF160 | BGN     | TLR4      | BGN_TLR4          |
| 7900 | ZNF160 | ZG16B   | TLR4      | ZG16B_TLR4        |
| 7901 | ZNF160 | HSPA1A  | TLR4      | HSPA1A_TLR4       |
| 7902 | ZNF160 | DEFB4A  | TLR4      | DEFB4A_TLR4       |
| 7903 | ZNF160 | HSP90B1 | TLR4      | HSP90B1_TLR4      |
| 7904 | ZNF160 | S100A9  | TLR4      | S100A9_TLR4       |
| 7905 | ZNF160 | S100A8  | TLR4      | S100A8_TLR4       |
| 7906 | RELA   | HSP90B1 | TLR7      | HSP90B1_TLR7      |
| 7907 | NFKB1  | HSP90B1 | TLR7      | HSP90B1_TLR7      |
| 7908 | HDAC3  | HSP90B1 | TLR9      | HSP90B1_TLR9      |
| 7909 | NFKB1  | HSP90B1 | TLR9      | HSP90B1_TLR9      |
| 7910 | CREB1  | HSP90B1 | TLR9      | HSP90B1_TLR9      |
| 7911 | ELK1   | HSP90B1 | TLR9      | HSP90B1_TLR9      |
| 7912 | ELF1   | HSP90B1 | TLR9      | HSP90B1_TLR9      |
| 7913 | CEBPA  | HSP90B1 | TLR9      | HSP90B1_TLR9      |
| 7914 | RELA   | HSP90B1 | TLR9      | HSP90B1_TLR9      |
| 7915 | PTMA   | HSP90B1 | TLR9      | HSP90B1_TLR9      |
| 7916 | ETS2   | HSP90B1 | TLR9      | HSP90B1_TLR9      |
| 7917 | HDAC1  | TNFSF10 | TNFRSF10A | TNFSF10_TNFRSF10A |
| 7918 | TP53   | TNFSF10 | TNFRSF10A | TNFSF10_TNFRSF10A |
| 7919 | JUN    | TNFSF10 | TNFRSF10A | TNFSF10_TNFRSF10A |
| 7920 | DDIT3  | TNFSF10 | TNFRSF10B | TNFSF10_TNFRSF10B |
| 7921 | MYC    | TNFSF10 | TNFRSF10B | TNFSF10_TNFRSF10B |
| 7922 | ATF4   | TNFSF10 | TNFRSF10B | TNFSF10_TNFRSF10B |
| 7923 | ELK1   | TNFSF10 | TNFRSF10B | TNFSF10_TNFRSF10B |
| 7924 | HDAC9  | TNFSF10 | TNFRSF10B | TNFSF10_TNFRSF10B |
| 7925 | GLI1   | TNFSF10 | TNFRSF10B | TNFSF10_TNFRSF10B |
| 7926 | TP53   | TNFSF10 | TNFRSF10B | TNFSF10_TNFRSF10B |
| 7927 | STAT3  | TNFSF10 | TNFRSF10B | TNFSF10_TNFRSF10B |
| 7928 | DNMT1  | TNFSF10 | TNFRSF10B | TNFSF10_TNFRSF10B |
| 7929 | GLI2   | TNFSF10 | TNFRSF10B | TNFSF10_TNFRSF10B |
| 7930 | YY1    | TNFSF10 | TNFRSF10B | TNFSF10_TNFRSF10B |
| 7931 | ATM    | TNFSF10 | TNFRSF10B | TNFSF10_TNFRSF10B |
| 7932 | SIRT1  | TNFSF10 | TNFRSF10B | TNFSF10_TNFRSF10B |
| 7933 | SMAD1  | VTN     | TNFRSF11B | VTN_TNFRSF11B     |
| 7934 | SMAD1  | FN1     | TNFRSF11B | FN1_TNFRSF11B     |
| 7935 | SMAD1  | TNFSF13 | TNFRSF11B | TNFSF13_TNFRSF11B |
| 7936 | SMAD1  | TNFSF11 | TNFRSF11B | TNFSF11_TNFRSF11B |
| 7937 | SMAD1  | VWF     | TNFRSF11B | VWF_TNFRSF11B     |
| 7938 | SMAD1  | THBS1   | TNFRSF11B | THBS1_TNFRSF11B   |
| 7939 | SMAD1  | TNFSF10 | TNFRSF11B | TNFSF10_TNFRSF11B |
| 7940 | PPARG  | VTN     | TNFRSF11B | VTN_TNFRSF11B     |
| 7941 | PPARG  | FN1     | TNFRSF11B | FN1_TNFRSF11B     |
| 7942 | PPARG  | TNFSF13 | TNFRSF11B | TNFSF13_TNFRSF11B |
| 7943 | PPARG  | TNFSF11 | TNFRSF11B | TNFSF11_TNFRSF11B |
| 7944 | PPARG  | VWF     | TNFRSF11B | VWF_TNFRSF11B     |
| 7945 | PPARG  | THBS1   | TNFRSF11B | THBS1_TNFRSF11B   |

|              |          |           |                    |
|--------------|----------|-----------|--------------------|
| 7946 PPARG   | TNFSF10  | TNFRSF11B | TNFSF10_TNFRSF11B  |
| 7947 CREB5   | VTN      | TNFRSF11B | VTN_TNFRSF11B      |
| 7948 CREB5   | FN1      | TNFRSF11B | FN1_TNFRSF11B      |
| 7949 CREB5   | TNFSF13  | TNFRSF11B | TNFSF13_TNFRSF11B  |
| 7950 CREB5   | TNFSF11  | TNFRSF11B | TNFSF11_TNFRSF11B  |
| 7951 CREB5   | VWF      | TNFRSF11B | VWF_TNFRSF11B      |
| 7952 CREB5   | THBS1    | TNFRSF11B | THBS1_TNFRSF11B    |
| 7953 CREB5   | TNFSF10  | TNFRSF11B | TNFSF10_TNFRSF11B  |
| 7954 HOXC8   | VTN      | TNFRSF11B | VTN_TNFRSF11B      |
| 7955 HOXC8   | FN1      | TNFRSF11B | FN1_TNFRSF11B      |
| 7956 HOXC8   | TNFSF13  | TNFRSF11B | TNFSF13_TNFRSF11B  |
| 7957 HOXC8   | TNFSF11  | TNFRSF11B | TNFSF11_TNFRSF11B  |
| 7958 HOXC8   | VWF      | TNFRSF11B | VWF_TNFRSF11B      |
| 7959 HOXC8   | THBS1    | TNFRSF11B | THBS1_TNFRSF11B    |
| 7960 HOXC8   | TNFSF10  | TNFRSF11B | TNFSF10_TNFRSF11B  |
| 7961 MAML1   | TNFSF12  | TNFRSF12A | TNFSF12_TNFRSF12A  |
| 7962 NR1I2   | TNFSF12  | TNFRSF12A | TNFSF12_TNFRSF12A  |
| 7963 RELA    | TNFSF13B | TNFRSF13C | TNFSF13B_TNFRSF13C |
| 7964 POU2AF1 | TNFSF13B | TNFRSF17  | TNFSF13B_TNFRSF17  |
| 7965 POU2AF1 | TNFSF13  | TNFRSF17  | TNFSF13_TNFRSF17   |
| 7966 JUN     | OMG      | TNFRSF1B  | OMG_TNFRSF1B       |
| 7967 JUN     | LTA      | TNFRSF1B  | LTA_TNFRSF1B       |
| 7968 VDR     | APP      | TNFRSF21  | APP_TNFRSF21       |
| 7969 NFkB1   | TNFSF9   | TNFRSF9   | TNFSF9_TNFRSF9     |
| 7970 RELA    | TNFSF9   | TNFRSF9   | TNFSF9_TNFRSF9     |
| 7971 PAX8    | FN1      | TSHR      | FN1_TSHR           |
| 7972 PAX8    | GNAI2    | TSHR      | GNAI2_TSHR         |
| 7973 PAX8    | CALR     | TSHR      | CALR_TSHR          |
| 7974 PAX8    | GNAS     | TSHR      | GNAS_TSHR          |
| 7975 PPARG   | FN1      | TSHR      | FN1_TSHR           |
| 7976 PPARG   | GNAI2    | TSHR      | GNAI2_TSHR         |
| 7977 PPARG   | CALR     | TSHR      | CALR_TSHR          |
| 7978 PPARG   | GNAS     | TSHR      | GNAS_TSHR          |
| 7979 CEBPA   | TFPI     | VLDLR     | TFPI_VLDLR         |
| 7980 CEBPA   | LPL      | VLDLR     | LPL_VLDLR          |
| 7981 CEBPA   | APOE     | VLDLR     | APOE_VLDLR         |
| 7982 HIC1    | TFPI     | VLDLR     | TFPI_VLDLR         |
| 7983 HIC1    | LPL      | VLDLR     | LPL_VLDLR          |
| 7984 HIC1    | APOE     | VLDLR     | APOE_VLDLR         |
| 7985 PPARG   | TFPI     | VLDLR     | TFPI_VLDLR         |
| 7986 PPARG   | LPL      | VLDLR     | LPL_VLDLR          |
| 7987 PPARG   | APOE     | VLDLR     | APOE_VLDLR         |
