# Supplementary material for: Single-Cell and Transcriptome-Based Immune Cell-Related Prognostic Model in Clear Cell Renal Cell Carcinoma
Source: Hindawi journal article supplement (doi:10.1155/2023/5355269), 2023-03-07
Supplement: f1 [file 5355269.f1.zip]

Table 5. Intersection genes in immune cell multifactor network relationship pair and TCG/

- 1 STAT3
- 2 TFCEP2
- 3 NFkB1
- 4 SP1
- 5 PAX2
- 6 SKIL
- 7 CEBPB
- 8 TFAP2A
- 9 GTF3A
- 10 HIF1A
- 11 RELA
- 12 SF1
- 13 GATA4
- 14 NR5A1
- 15 WT1
- 16 ESR1
- 17 SOX9
- 18 VDR
- 19 NR0B1
- 20 ING4
- 21 SMAD3
- 22 PPARD
- 23 PPARG
- 24 PPARA
- 25 NR2F1
- 26 NR2F6
- 27 FOXA1
- 28 HNF4A
- 29 ATF2
- 30 HDAC1
- 31 JUN
- 32 HDAC3
- 33 PPARGC1A
- 34 SMAD4
- 35 NR0B2
- 36 FOXM1
- 37 ATF4
- 38 ETS2
- 39 TBP
- 40 HDAC9
- 41 CTCF
- 42 NFIL3
- 43 STAT1
- 44 BRCA1
- 45 ZBTB2
- 46 USF2
- 47 USF1
- 48 CREB1
- 49 REST
- 50 CEBPD
- 51 STAT6
- 52 YY1
- 53 RELB
- 54 NFkB2
- 55 E2F1
- 56 RUNX1
- 57 CREM

58 JUND  
59 SPI1  
60 NFKBIA  
61 KLF13  
62 IRF7  
63 ATF3  
64 IRF1  
65 IRF3  
66 REL  
67 LEF1  
68 SP3  
69 MEF2D  
70 SP2  
71 KLF4  
72 MYB  
73 TAL1  
74 MZF1  
75 FOS  
76 GATA3  
77 RFX1  
78 PARP1  
79 DNMT1  
80 YBX1  
81 TCF12  
82 TWIST1  
83 SIX1  
84 FOXF1  
85 GLI2  
86 MTA2  
87 FOXQ1  
88 SPDEF  
89 KLF8  
90 SMARCA4  
91 FOXA2  
92 TWIST2  
93 HMGA1  
94 ZEB1  
95 EZH2  
96 HOXA7  
97 SNAI2  
98 SIRT1  
99 SALL4  
100 ZEB2  
101 KLF6  
102 RBBP7  
103 LCOR  
104 TCF3  
105 MTA1  
106 HDGF  
107 AR  
108 ZNF217  
109 SNAI1  
110 RB1  
111 LMO2  
112 HMGA2  
113 HDAC2  
114 CBX7  
115 STAT5A

116 STAT5B  
117 PTF1A  
118 CEBPZ  
119 NFIC  
120 CIITA  
121 MYBL2  
122 ETS1  
123 MKL1  
124 RFX5  
125 FLI1  
126 EP300  
127 KLF11  
128 LMX1B  
129 HNF1A  
130 CEBPA  
131 ABL1  
132 CREBBP  
133 FOXF2  
134 GLI1  
135 NR1H4  
136 NFKBIZ  
137 KDM2A  
138 GATA1  
139 APC  
140 NR4A1  
141 EGR2  
142 PDCD11  
143 EGR1  
144 MAX  
145 MYC  
146 FOXO3  
147 RFX2  
148 RFX3  
149 ERG  
150 HOXB7  
151 PTTG1  
152 TP53  
153 HDAC5  
154 SOX17  
155 CDX2  
156 MBD2  
157 MYOD1  
158 KAT5  
159 HDAC7  
160 HIVEP2  
161 MYCN  
162 HSF1  
163 GLI3  
164 NR1I2  
165 BTG2  
166 MAZ  
167 POU4F1  
168 POU4F2  
169 XBP1P1  
170 ETV5  
171 RARA  
172 IFI16  
173 RARG

174 NFATC1  
175 RUNX3  
176 TBX21  
177 STAT4  
178 MSC  
179 PROX1  
180 TFAP4  
181 EOMES  
182 NFATC2  
183 NCOR1  
184 NCOR2  
185 OTX2  
186 MBD1  
187 ASCL1  
188 PLAGL2  
189 KHDRBS1  
190 PLAG1  
191 DDX5  
192 SUZ12  
193 RUNX2  
194 HDAC11  
195 IRF8  
196 HDAC4  
197 PGR  
198 ATF1  
199 FOXP3  
200 E2F6  
201 AHR  
202 HOXA10  
203 SUGP1  
204 JUNB  
205 POU2F1  
206 ILF3  
207 FOXK2  
208 TOB1  
209 SATB1  
210 ILF2  
211 BACH2  
212 KLF2  
213 ZFP36  
214 RORC  
215 IRF2  
216 SPIC  
217 MAF  
218 FOSL2  
219 POU2F2  
220 GBX2  
221 DDIT3  
222 FOXO1  
223 RBPJ  
224 ZNF300  
225 ZMYND11  
226 NEUROD1  
227 PDX1  
228 PAX4  
229 GLIS3  
230 MAFA  
231 MED23

232 SSB  
233 NANOG  
234 CREB5  
235 SREBF2  
236 NFAT5  
237 CEBPE  
238 BTF3  
239 PAX5  
240 NR4A2  
241 ETV3  
242 FOSL1  
243 ETV4  
244 BACH1  
245 CITED2  
246 RFWD2  
247 ZNF410  
248 ING2  
249 HTATIP2  
250 SRF  
251 SSX2  
252 TFAP2C  
253 PAX6  
254 CTNNB1  
255 NCOA3  
256 KLF5  
257 ELF4  
258 ELF3  
259 MAL  
260 IKBKB  
261 CLOCK  
262 PAX8  
263 SOX4  
264 IRF9  
265 ELK1  
266 PBX2  
267 MEIS1  
268 PBX1  
269 PKNX1  
270 TIAL1  
271 ZBTB7A  
272 NF1  
273 GATA6  
274 HOXD3  
275 ONECUT1  
276 SETBP1  
277 STAT2  
278 ENO1  
279 DR1  
280 CDX1  
281 TCF7L2  
282 HOXA5  
283 MECP2  
284 TBR1  
285 POU1F1  
286 RXRA  
287 THRA  
288 ESR2  
289 ARNTL2

290 EPAS1  
291 KLF10  
292 TGIF1  
293 NKX2.1  
294 CEBPG  
295 PAX3  
296 NR3C1  
297 POU5F1  
298 FOXD3  
299 KCNIP3  
300 FOSB  
301 SMAD7  
302 ASH1L  
303 LRRFIP1  
304 HMGB2  
305 IRF5  
306 FOXO4  
307 PML  
308 DACH1  
309 HSF2  
310 HOXA9  
311 TCF4  
312 TEAD4  
313 ATM  
314 VHL  
315 E2F3  
316 NKX3.1  
317 ZNF24  
318 HIPK2  
319 HEXIM1  
320 UHRF1  
321 COPS5  
322 MEF2C  
323 ARNT  
324 ZFP36L1  
325 TRAF6  
326 ID3  
327 HIC1  
328 ZNF148  
329 TRIM16  
330 SOX2  
331 NR1H3  
332 ZNF202  
333 NR1H2  
334 SND1  
335 TFDP1  
336 SREBF1  
337 NR3C2  
338 TRERF1  
339 APEX1  
340 EIF2AK2  
341 HES1  
342 XRCC6  
343 XRCC5  
344 SPIB  
345 SMARCA1  
346 SMARCB1  
347 CHD4

348 MSX2  
349 DNMT3A  
350 FOXI1  
351 CUX1  
352 NFE2L2  
353 NRF1  
354 ZBTB16  
355 CREB3  
356 TSG101  
357 BCL3  
358 AES  
359 PURA  
360 GABPA  
361 SP4  
362 ATF7  
363 ELF1  
364 DENND4A  
365 TFAP2B  
366 WWP1  
367 NFYC  
368 NFYB  
369 NFYA  
370 GATA2  
371 SHOX  
372 E2F5  
373 ECD  
374 TBX5  
375 HOXD1  
376 HEY1  
377 MITF  
378 RBMX  
379 NR2C2  
380 KLF15  
381 WWTR1  
382 FOXP2  
383 PITX3  
384 HR  
385 ZNF444  
386 NFE2  
387 EWSR1  
388 KLF14  
389 RARB  
390 ZNF160  
391 PTMA  
392 SMAD1  
393 HOXC8  
394 MAML1  
395 POU2AF1  
396 A2M  
397 ADAM10  
398 ADAM12  
399 ADAM17  
400 ADM  
401 ALOX5AP  
402 AMH  
403 ANGPT1  
404 ANGPTL4  
405 APOB

406 APOC3  
407 APOE  
408 APP  
409 AREG  
410 ARF1  
411 B2M  
412 BDNF  
413 BGN  
414 BST1  
415 C3  
416 C4A  
417 CAMP  
418 CCL11  
419 CCL13  
420 CCL19  
421 CCL20  
422 CCL21  
423 CCL3  
424 CCL4  
425 CCL5  
426 CCL7  
427 CD14  
428 CD24  
429 CD34  
430 CD40LG  
431 CD70  
432 CDH1  
433 CEL  
434 CFH  
435 COL11A1  
436 COL18A1  
437 COL1A1  
438 COL1A2  
439 COL2A1  
440 COL4A1  
441 COL4A3  
442 COL4A4  
443 COL7A1  
444 CRP  
445 CSF1  
446 CSF2  
447 CTGF  
448 CXCL10  
449 CXCL12  
450 CYR61  
451 DCN  
452 DEFB1  
453 DEFB103A  
454 DEFB4A  
455 EGF  
456 EREG  
457 F10  
458 F13A1  
459 F8  
460 F9  
461 FASLG  
462 FBLN1  
463 FBN1



464 FGA  
465 FGB  
466 FGF1  
467 FGF2  
468 FGG  
469 FGL1  
470 FN1  
471 GNAS  
472 GSTP1  
473 GZMB  
474 HAS2  
475 HBEGF  
476 HDC  
477 HGF  
478 HLA.A  
479 HLA.B  
480 HLA.C  
481 HLA.E  
482 HLA.G  
483 HMGB1  
484 HP  
485 HRAS  
486 HSP90AA1  
487 HSPA1A  
488 ICAM1  
489 ICAM2  
490 ICAM3  
491 IFNG  
492 IGF1  
493 IGF2  
494 IGFBP4  
495 IHH  
496 IL10  
497 IL12A  
498 IL13  
499 IL15  
500 IL18  
501 IL1A  
502 IL1B  
503 IL1RN  
504 IL2  
505 IL21  
506 IL22  
507 IL4  
508 IL5  
509 IL6  
510 IL7  
511 INS  
512 KISS1  
513 L1CAM  
514 LAMA1  
515 LAMB1  
516 LAMC2  
517 LGALS3BP  
518 LIPC  
519 LPL  
520 LTA  
521 LTB

522 LTF  
523 LYZ  
524 MADCAM1  
525 MATN1  
526 MMP1  
527 MMP12  
528 MMP13  
529 MMP2  
530 MMP7  
531 MMP9  
532 MST1  
533 NAMPT  
534 NCAM1  
535 NGF  
536 PDGFB  
537 PF4  
538 PIP  
539 PKM  
540 PLAT  
541 PLAU  
542 PLG  
543 PLTP  
544 PNOC  
545 PODXL  
546 PROC  
547 PROS1  
548 PSEN1  
549 PTGS2  
550 PTN  
551 RELN  
552 REN  
553 RNASE2  
554 S100A9  
555 SAA1  
556 SERPINC1  
557 SERPINE1  
558 SFTPA1  
559 SFTPD  
560 SHBG  
561 SHH  
562 SLIT2  
563 SLPI  
564 SPP1  
565 TCN2  
566 TG  
567 TGFA  
568 TGFB1  
569 TGFB2  
570 TGFB3  
571 THBS1  
572 THBS2  
573 TIMP1  
574 TIMP2  
575 TNC  
576 TNF  
577 TNFSF10  
578 TNFSF11  
579 TNFSF13B

580 TNFSF14  
581 TNFSF4  
582 TSLP  
583 VCAM1  
584 VCAN  
585 VEGFA  
586 VEGFC  
587 VIM  
588 VWF  
589 WNT3A  
590 CALM2  
591 CALM1  
592 CALM3  
593 GNAI2  
594 UBA52  
595 GAS6  
596 CCL28  
597 CCL3L3  
598 IL16  
599 DEFB103B  
600 DEFB4B  
601 DUSP18  
602 LAMB3  
603 BTLA  
604 C4BPA  
605 COL14A1  
606 NCAN  
607 CD55  
608 C1QA  
609 IL34  
610 CSF3  
611 VASP  
612 CXCL9  
613 CXCL11  
614 CXCL13  
615 ZG16B  
616 SEMA4B  
617 BTC  
618 ANXA1  
619 NRG4  
620 SPINK1  
621 FGF13  
622 ZP3  
623 BCAN  
624 EPGN  
625 EFEMP1  
626 EFNA1  
627 NUCB2  
628 HSP90B1  
629 NRG1  
630 NRG2  
631 TFPI  
632 ITIH2  
633 HRG  
634 CALR  
635 IL9  
636 AHSG  
637 SORBS1

638 GIP  
639 TGM2  
640 ICAM5  
641 LPA  
642 SELPLG  
643 SPON2  
644 KNG1  
645 COL4A5  
646 VTN  
647 COL6A2  
648 FIGF  
649 ADAM15  
650 NID1  
651 ADAM2  
652 COL6A3  
653 HSPG2  
654 COL5A1  
655 MDK  
656 CHAD  
657 SEMA7A  
658 LAMC1  
659 ADAM9  
660 NPNT  
661 LAMC3  
662 LAMA2  
663 COL6A1  
664 COL5A2  
665 COL4A6  
666 LAMA4  
667 COL3A1  
668 LAMA5  
669 KITLG  
670 CLEC11A  
671 SERPINE2  
672 SERPING1  
673 SERPINA1  
674 C1QB  
675 LRPAP1  
676 FCN2  
677 PSAP  
678 SEMA5A  
679 SEMA4D  
680 RTN4  
681 SYTL3  
682 LRP1B  
683 SLIT1  
684 LACRT  
685 RSPO3  
686 FGF6  
687 PODXL2  
688 MUC7  
689 GNB3  
690 CGN  
691 GDF9  
692 F2  
693 S100A8  
694 TNFSF13  
695 TNFSF12

696 OMG  
697 TNFSF9  
698 LRP1  
699 AXL  
700 SDC4  
701 ITGB1  
702 RAMP2  
703 CALCR  
704 GPR182  
705 MRGPRX2  
706 CALCRL  
707 ALOX5  
708 EGFR  
709 TIE1  
710 ITGB2  
711 OLR1  
712 ITGAM  
713 TLR2  
714 LRP5  
715 LRP2  
716 CHRNA4  
717 LDLR  
718 SCARB1  
719 LRP8  
720 VLDLR  
721 SORL1  
722 NGFR  
723 CAV1  
724 FPR2  
725 NCSTN  
726 TNFRSF21  
727 GPC1  
728 CD74  
729 SLC45A3  
730 ERBB3  
731 PLD2  
732 INSR  
733 CHRM3  
734 CD3D  
735 HLA.F  
736 KLRC1  
737 KIR2DL3  
738 TFRC  
739 KIR2DL1  
740 LILRB2  
741 CD3G  
742 KLRD1  
743 KIR3DL1  
744 HFE  
745 CD1A  
746 CD247  
747 CD1B  
748 LILRB1  
749 NGFRAP1  
750 DDR1  
751 LY96  
752 TLR4  
753 IFITM1

754 ITGAX  
755 CD81  
756 C5AR2  
757 CR1  
758 C3AR1  
759 CD19  
760 CD46  
761 CXCR3  
762 CCR7  
763 CCR6  
764 ACKR2  
765 CCR4  
766 CCR1  
767 CCR3  
768 CCR5  
769 CCR8  
770 SDC1  
771 GPR75  
772 ACKR4  
773 ITGA4  
774 SELP  
775 SELL  
776 CD40  
777 TRAF3  
778 CD27  
779 CDH2  
780 PTPRM  
781 KLRG1  
782 PTPRF  
783 CXCR4  
784 CD36  
785 CD44  
786 ITGB8  
787 CD47  
788 CD93  
789 ITGAV  
790 ITGA2  
791 ITGA1  
792 CSF1R  
793 CSF2RA  
794 CSF3R  
795 CD4  
796 MET  
797 ERBB2  
798 ERBB4  
799 TNFRSF1A  
800 FAS  
801 PLAUR  
802 CD79A  
803 TSHR  
804 ITGA6  
805 COL13A1  
806 ITGA8  
807 ITGA5  
808 ITGA9  
809 IL17RC  
810 ITGB6  
811 NT5E

812 C5AR1  
813 FLT4  
814 ITGB3  
815 ROBO4  
816 ITGA2B  
817 ITGA3  
818 SDC2  
819 TNFRSF11B  
820 TMPRSS6  
821 MAG  
822 ITGB7  
823 LHCGR  
824 GCGR  
825 ADORA1  
826 ADCY9  
827 PTGDR  
828 GLP1R  
829 ADRB3  
830 ADCY8  
831 HTR6  
832 CRHR1  
833 AVPR2  
834 ADCY1  
835 ADCY7  
836 VIPR1  
837 PTGIR  
838 TRAF2  
839 IGF2R  
840 PGRMC1  
841 HMMR  
842 PRLR  
843 CD82  
844 CD9  
845 HRH1  
846 HRH4  
847 HRH2  
848 HRH3  
849 ST14  
850 APLP2  
851 KIR3DL2  
852 CANX  
853 KIR2DS4  
854 SLC9C2  
855 NOTCH4  
856 KLRC2  
857 SLC16A4  
858 THBD  
859 ASGR1  
860 ASGR2  
861 FGFR3  
862 CFTR  
863 GRIN2D  
864 IL2RA  
865 ITGAL  
866 IL2RG  
867 ITGAD  
868 CLEC4M  
869 IFNGR2

870 IFNGR1  
871 FZD8  
872 LRP6  
873 PTCH2  
874 IL10RA  
875 SIRPG  
876 CD28  
877 IL12RB2  
878 IL12RB1  
879 IL13RA1  
880 IL2RB  
881 CD48  
882 IL1RL2  
883 IL1RAPL1  
884 IL18R1  
885 IL18RAP  
886 IL1R2  
887 IL1R1  
888 ADRB2  
889 IL1RAP  
890 CD53  
891 IL5RA  
892 F3  
893 IL6R  
894 IL6ST  
895 IL7R  
896 KISS1R  
897 RPSA  
898 CD151  
899 VANG1  
900 GPIHBP1  
901 LTBR  
902 TNFRSF1B  
903 CDH6  
904 MST1R  
905 PTPRA  
906 PLGRKT  
907 ABCA1  
908 OPRL1  
909 TYRO3  
910 PLXNB2  
911 ATP6AP2  
912 FPR1  
913 CLDN4  
914 S1PR1  
915 CNR1  
916 TGFB1  
917 CD63  
918 TNFRSF10A  
919 TNFRSF10D  
920 TNFRSF10B  
921 TNFRSF10C  
922 TNFRSF13C  
923 TNFRSF17  
924 TNFRSF13B  
925 TNFRSF4  
926 TLR1  
927 NRP2



928 RET  
929 NRP1  
930 EPHB2  
931 KDR  
932 SIRPA  
933 FLT1  
934 ADRA2B  
935 AGTR1  
936 CXCR1  
937 CXCR2  
938 CXCR5  
939 DCBLD2  
940 DRD2  
941 EDNRB  
942 EPHA2  
943 EPHA3  
944 ERAP1  
945 F2R  
946 FCER1A  
947 FCGR1A  
948 FSHR  
949 GP6  
950 IGF1R  
951 KCNN4  
952 KCNQ3  
953 KIT  
954 MIP  
955 NOTCH1  
956 NRXN1  
957 OPRM1  
958 SCARF1  
959 SCTR  
960 SELE  
961 TBXA2R  
962 TGFB2  
963 TLR7  
964 TLR9  
965 TNFRSF12A  
966 TNFRSF9
