# Supplementary material for: Single-Cell and Transcriptome-Based Immune Cell-Related Prognostic Model in Clear Cell Renal Cell Carcinoma
Source: Hindawi journal article supplement (doi:10.1155/2023/5355269), 2023-03-07
Supplement: f1 [file 5355269.f1.zip]

- 0 CD8+ T-cells
- 1 NK cells
- 2 CD8+ T-cells
- 3 CD8+ T-cells
- 4 Monocytes
- 5 Monocytes
- 6 Macrophages
- 7 CD8+ T-cells
- 8 Endothelial cells
- 9 Macrophages
- 10 Adipocytes
- 11 Endothelial cells
- 12 CD8+ T-cells
- 13 Monocytes
- 14 Adipocytes
- 15 Macrophages
- 16 B-cells
- 17 Adipocytes
- 18 CD8+ T-cells
- 19 Epithelial cells
- 20 Adipocytes
- 21 Endothelial cells
- 22 Monocytes
