# Supplementary material for: Single-Cell and Transcriptome-Based Immune Cell-Related Prognostic Model in Clear Cell Renal Cell Carcinoma
Source: Hindawi journal article supplement (doi:10.1155/2023/5355269), 2023-03-07
Supplement: f1 [file 5355269.f1.zip]

|              | p_val     | avg_log2FC   | pct.1 | pct.2 | p_val_adj | cluster |
|--------------|-----------|--------------|-------|-------|-----------|---------|
| IL7R         | 0         | 2.498747386  | 0.707 | 0.184 | 0         | 0       |
| ZFP36L2      | 0         | 1.639237107  | 0.919 | 0.633 | 0         | 0       |
| GPR171       | 0         | 1.476813325  | 0.393 | 0.083 | 0         | 0       |
| CD69         | 0         | 1.45374069   | 0.825 | 0.441 | 0         | 0       |
| TNFAIP3      | 0         | 1.337307943  | 0.684 | 0.377 | 0         | 0       |
| CD40LG       | 0         | 1.25010645   | 0.257 | 0.024 | 0         | 0       |
| BTG1         | 0         | 1.187860856  | 0.972 | 0.804 | 0         | 0       |
| CD52         | 0         | 1.186332075  | 0.805 | 0.473 | 0         | 0       |
| CXCR4        | 0         | 1.185357238  | 0.936 | 0.727 | 0         | 0       |
| TSC22D3      | 0         | 1.069593535  | 0.916 | 0.741 | 0         | 0       |
| RPS29        | 0         | 0.806734413  | 0.97  | 0.907 | 0         | 0       |
| RPS27        | 0         | 0.654865721  | 0.985 | 0.972 | 0         | 0       |
| RPL28        | 0         | 0.580367218  | 0.968 | 0.922 | 0         | 0       |
| RPLP2        | 0         | 0.563589726  | 0.968 | 0.937 | 0         | 0       |
| JUNB         | 6.99E-290 | 1.080647433  | 0.87  | 0.68  | 1.61E-285 | 0       |
| SARAF        | 3.18E-286 | 0.909846794  | 0.826 | 0.634 | 7.31E-282 | 0       |
| KLF6         | 1.11E-258 | 1.01702788   | 0.814 | 0.6   | 2.56E-254 | 0       |
| RPS3         | 3.06E-258 | 0.504751999  | 0.962 | 0.906 | 7.03E-254 | 0       |
| JUN          | 2.47E-256 | 1.06240465   | 0.848 | 0.645 | 5.67E-252 | 0       |
| CD2          | 3.94E-253 | 0.869416926  | 0.724 | 0.378 | 9.05E-249 | 0       |
| AC016831.7   | 6.20E-249 | 1.269719505  | 0.374 | 0.13  | 1.43E-244 | 0       |
| FTL          | 2.74E-243 | -1.729311751 | 0.917 | 0.943 | 6.30E-239 | 0       |
| CD74         | 1.99E-234 | -2.011099254 | 0.741 | 0.809 | 4.58E-230 | 0       |
| CD3D         | 1.24E-230 | 0.715680058  | 0.749 | 0.393 | 2.85E-226 | 0       |
| STK4         | 4.25E-228 | 1.053060726  | 0.654 | 0.418 | 9.78E-224 | 0       |
| RORA         | 3.55E-227 | 1.090030826  | 0.411 | 0.161 | 8.16E-223 | 0       |
| TXNIP        | 7.72E-222 | 0.924205351  | 0.877 | 0.73  | 1.77E-217 | 0       |
| CD44         | 6.71E-220 | 0.932583829  | 0.673 | 0.437 | 1.54E-215 | 0       |
| HLA-DRB1     | 2.66E-214 | -2.17716892  | 0.408 | 0.645 | 6.12E-210 | 0       |
| CD63         | 2.12E-213 | -1.429592734 | 0.305 | 0.583 | 4.88E-209 | 0       |
| CST3         | 3.73E-210 | -2.250465459 | 0.17  | 0.449 | 8.57E-206 | 0       |
| CD3E         | 1.28E-209 | 0.821543033  | 0.629 | 0.329 | 2.95E-205 | 0       |
| RPL14        | 7.23E-209 | 0.526996971  | 0.933 | 0.85  | 1.66E-204 | 0       |
| ANXA1        | 2.32E-208 | 1.10455708   | 0.646 | 0.419 | 5.34E-204 | 0       |
| IL32         | 3.65E-206 | 0.695611553  | 0.797 | 0.513 | 8.39E-202 | 0       |
| PIK3IP1      | 1.72E-200 | 1.003359431  | 0.541 | 0.304 | 3.94E-196 | 0       |
| RHOB         | 1.15E-199 | -1.592006696 | 0.127 | 0.414 | 2.64E-195 | 0       |
| LEPROTL1     | 5.49E-199 | 1.04887008   | 0.553 | 0.341 | 1.26E-194 | 0       |
| LTB          | 4.81E-198 | 0.974451254  | 0.502 | 0.242 | 1.11E-193 | 0       |
| HLA-DRA      | 5.02E-196 | -2.412741148 | 0.544 | 0.711 | 1.15E-191 | 0       |
| TYROBP       | 2.73E-195 | -2.1458991   | 0.186 | 0.447 | 6.28E-191 | 0       |
| RP11-138A9.2 | 7.83E-192 | 1.211646869  | 0.359 | 0.142 | 1.80E-187 | 0       |
| STK17A       | 1.92E-190 | 0.949716514  | 0.547 | 0.313 | 4.40E-186 | 0       |
| CYTIP        | 1.08E-187 | 0.849830431  | 0.649 | 0.424 | 2.47E-183 | 0       |
| IFITM3       | 4.01E-187 | -1.983243301 | 0.166 | 0.441 | 9.22E-183 | 0       |
| TRAC         | 1.22E-184 | 0.647581344  | 0.672 | 0.361 | 2.81E-180 | 0       |
| RP11-347P5.1 | 6.12E-181 | 0.975126582  | 0.564 | 0.32  | 1.41E-176 | 0       |
| RP11-138A9.1 | 1.78E-177 | 1.062154212  | 0.35  | 0.144 | 4.10E-173 | 0       |
| ODF2L        | 8.47E-171 | 1.055341006  | 0.423 | 0.211 | 1.95E-166 | 0       |
| FCGR3A       | 7.00E-170 | -1.585384164 | 0.053 | 0.287 | 1.61E-165 | 0       |
| FCER1G       | 1.00E-166 | -1.790182178 | 0.118 | 0.358 | 2.30E-162 | 0       |
| HLA-DMA      | 1.16E-164 | -1.310329922 | 0.098 | 0.343 | 2.66E-160 | 0       |
| SERPINA1     | 3.38E-164 | -1.700517266 | 0.09  | 0.334 | 7.77E-160 | 0       |
| HSPB1        | 9.09E-164 | -1.590313777 | 0.237 | 0.493 | 2.09E-159 | 0       |
| RPSA         | 8.39E-163 | 0.528744602  | 0.894 | 0.777 | 1.93E-158 | 0       |
| GSTP1        | 2.89E-157 | -1.127427056 | 0.289 | 0.548 | 6.65E-153 | 0       |
| SPOCK2       | 7.01E-156 | 0.865324317  | 0.398 | 0.186 | 1.61E-151 | 0       |

|            |           |              |       |       |           |   |
|------------|-----------|--------------|-------|-------|-----------|---|
| GPX1       | 7.09E-154 | -1.754464431 | 0.25  | 0.482 | 1.63E-149 | 0 |
| DDX5       | 1.89E-153 | 0.519557846  | 0.919 | 0.779 | 4.34E-149 | 0 |
| FCGRT      | 6.01E-153 | -1.12781939  | 0.065 | 0.293 | 1.38E-148 | 0 |
| ZFP36      | 1.39E-150 | 0.829310749  | 0.78  | 0.629 | 3.19E-146 | 0 |
| RGS1       | 5.05E-150 | 0.707902447  | 0.863 | 0.648 | 1.16E-145 | 0 |
| PPP2R5C    | 1.29E-149 | 0.887740298  | 0.547 | 0.344 | 2.95E-145 | 0 |
| GSN        | 4.34E-146 | -1.610495118 | 0.058 | 0.274 | 9.98E-142 | 0 |
| TRAT1      | 7.15E-145 | 0.797572403  | 0.264 | 0.093 | 1.64E-140 | 0 |
| PTMS       | 5.01E-144 | -0.975472827 | 0.067 | 0.294 | 1.15E-139 | 0 |
| PDK4       | 2.86E-143 | -1.570404894 | 0.044 | 0.251 | 6.58E-139 | 0 |
| CD9        | 9.35E-143 | -1.324876968 | 0.058 | 0.272 | 2.15E-138 | 0 |
| AC092580.4 | 2.75E-142 | 0.960806646  | 0.328 | 0.139 | 6.32E-138 | 0 |
| GRN        | 1.12E-140 | -1.250439832 | 0.085 | 0.304 | 2.56E-136 | 0 |
| HLA-DQA1   | 1.30E-140 | -1.742592934 | 0.169 | 0.395 | 2.99E-136 | 0 |
| CD3G       | 4.85E-140 | 0.684477867  | 0.472 | 0.24  | 1.11E-135 | 0 |
| NFKBIA     | 1.18E-139 | 0.878385425  | 0.679 | 0.522 | 2.72E-135 | 0 |
| IDS        | 4.02E-139 | 0.980019011  | 0.509 | 0.333 | 9.23E-135 | 0 |
| NPC2       | 4.70E-137 | -1.541576043 | 0.208 | 0.43  | 1.08E-132 | 0 |
| EVL        | 5.38E-136 | 0.702119343  | 0.643 | 0.452 | 1.24E-131 | 0 |
| APLP2      | 3.81E-135 | -0.942663783 | 0.084 | 0.306 | 8.75E-131 | 0 |
| PTGER4     | 1.96E-133 | 0.891003675  | 0.363 | 0.181 | 4.50E-129 | 0 |
| S100A4     | 3.24E-133 | 0.557395764  | 0.83  | 0.661 | 7.45E-129 | 0 |
| PTPRC      | 4.88E-133 | 0.617731208  | 0.786 | 0.566 | 1.12E-128 | 0 |
| AIF1       | 9.61E-132 | -1.662125065 | 0.101 | 0.306 | 2.21E-127 | 0 |
| SRSF7      | 4.96E-129 | 0.705057435  | 0.68  | 0.504 | 1.14E-124 | 0 |
| NNMT       | 5.75E-125 | -2.139264673 | 0.132 | 0.349 | 1.32E-120 | 0 |
| HLA-DPA1   | 2.56E-124 | -1.909608527 | 0.444 | 0.608 | 5.87E-120 | 0 |
| HLA-DMB    | 3.51E-123 | -1.055784926 | 0.061 | 0.255 | 8.07E-119 | 0 |
| CD96       | 1.18E-122 | 0.780593443  | 0.394 | 0.206 | 2.72E-118 | 0 |
| KLRB1      | 1.31E-122 | 1.182059618  | 0.355 | 0.17  | 3.02E-118 | 0 |
| PSAP       | 7.18E-122 | -1.304473252 | 0.316 | 0.513 | 1.65E-117 | 0 |
| PDCD4      | 1.69E-118 | 0.863618039  | 0.433 | 0.265 | 3.89E-114 | 0 |
| NDUFA4L2   | 2.80E-117 | -2.233840883 | 0.132 | 0.335 | 6.43E-113 | 0 |
| HLA-DQB1   | 7.56E-117 | -1.49473879  | 0.235 | 0.439 | 1.74E-112 | 0 |
| SPP1       | 1.03E-115 | -2.50625772  | 0.073 | 0.259 | 2.36E-111 | 0 |
| ADIRF      | 1.32E-115 | -2.06112359  | 0.09  | 0.286 | 3.04E-111 | 0 |
| HLA-DPB1   | 2.24E-115 | -1.801767973 | 0.534 | 0.661 | 5.16E-111 | 0 |
| AIM1       | 2.29E-114 | 0.972943556  | 0.308 | 0.151 | 5.27E-110 | 0 |
| CEBPD      | 2.37E-112 | -1.058604    | 0.126 | 0.324 | 5.44E-108 | 0 |
| FTH1       | 3.29E-111 | -1.244435836 | 0.956 | 0.964 | 7.55E-107 | 0 |
| ASAH1      | 5.78E-111 | -0.88083955  | 0.089 | 0.285 | 1.33E-106 | 0 |
| TRBC2      | 5.81E-110 | 0.57490145   | 0.542 | 0.328 | 1.34E-105 | 0 |
| LAPTM4A    | 6.70E-110 | -0.930337301 | 0.182 | 0.402 | 1.54E-105 | 0 |
| RAC1       | 2.26E-109 | -1.014922808 | 0.297 | 0.493 | 5.19E-105 | 0 |
| LYZ        | 1.19E-108 | -2.40223536  | 0.209 | 0.393 | 2.74E-104 | 0 |
| ACAP1      | 1.18E-106 | 0.706980333  | 0.476 | 0.291 | 2.71E-102 | 0 |
| FOSB       | 2.66E-105 | 0.67552563   | 0.562 | 0.385 | 6.11E-101 | 0 |
| YWHAH      | 4.96E-103 | -1.144875462 | 0.134 | 0.327 | 1.14E-98  | 0 |
| CRYAB      | 1.94E-102 | -1.96627258  | 0.114 | 0.302 | 4.45E-98  | 0 |
| CYB5A      | 3.60E-102 | -1.445123938 | 0.089 | 0.271 | 8.28E-98  | 0 |
| GAPDH      | 1.41E-101 | -0.933802234 | 0.836 | 0.875 | 3.23E-97  | 0 |
| TUBA4A     | 2.47E-100 | 0.686623232  | 0.407 | 0.233 | 5.68E-96  | 0 |
| TPI1       | 1.57E-98  | -0.975921867 | 0.409 | 0.61  | 3.60E-94  | 0 |
| FKBP1A     | 5.46E-98  | -1.070863345 | 0.247 | 0.462 | 1.26E-93  | 0 |
| IGFBP7     | 1.01E-93  | -2.82009584  | 0.233 | 0.422 | 2.33E-89  | 0 |
| BST2       | 1.10E-93  | -0.780670749 | 0.197 | 0.409 | 2.52E-89  | 0 |
| FKBP11     | 1.67E-93  | 0.654439154  | 0.273 | 0.129 | 3.85E-89  | 0 |
| SOD2       | 1.80E-93  | -1.384677146 | 0.148 | 0.336 | 4.13E-89  | 0 |

|          |          |              |       |       |          |   |
|----------|----------|--------------|-------|-------|----------|---|
| PKM      | 1.99E-93 | -0.906007269 | 0.273 | 0.481 | 4.57E-89 | 0 |
| ETS1     | 1.63E-92 | 0.616510367  | 0.475 | 0.298 | 3.75E-88 | 0 |
| AAK1     | 4.30E-92 | 0.759699127  | 0.479 | 0.338 | 9.89E-88 | 0 |
| APOC1    | 2.98E-91 | -1.92851962  | 0.147 | 0.324 | 6.85E-87 | 0 |
| GPR183   | 4.86E-91 | 0.678492799  | 0.352 | 0.197 | 1.12E-86 | 0 |
| EML4     | 2.00E-90 | 0.801408838  | 0.312 | 0.173 | 4.60E-86 | 0 |
| ATOX1    | 5.24E-90 | -0.759762676 | 0.088 | 0.265 | 1.21E-85 | 0 |
| YWHAE    | 2.88E-89 | -0.745512629 | 0.157 | 0.358 | 6.62E-85 | 0 |
| LCK      | 4.05E-88 | 0.581571045  | 0.422 | 0.248 | 9.32E-84 | 0 |
| SMCHD1   | 8.69E-85 | 0.780021513  | 0.43  | 0.297 | 2.00E-80 | 0 |
| TRBC1    | 1.06E-84 | 0.550265954  | 0.49  | 0.312 | 2.45E-80 | 0 |
| FXD5     | 2.87E-84 | 0.567328327  | 0.579 | 0.452 | 6.59E-80 | 0 |
| CCNH     | 3.47E-84 | 0.810527951  | 0.389 | 0.253 | 7.98E-80 | 0 |
| AKR1B1   | 1.52E-83 | -0.71824902  | 0.104 | 0.276 | 3.50E-79 | 0 |
| HSPA1A   | 2.18E-83 | -1.237644624 | 0.105 | 0.272 | 5.01E-79 | 0 |
| ISG20    | 8.15E-83 | 0.582298691  | 0.479 | 0.326 | 1.87E-78 | 0 |
| HSBP1    | 1.60E-81 | -0.639757238 | 0.103 | 0.279 | 3.67E-77 | 0 |
| ANXA5    | 6.66E-81 | -0.742744324 | 0.204 | 0.395 | 1.53E-76 | 0 |
| TYMP     | 5.36E-80 | -0.857143108 | 0.162 | 0.335 | 1.23E-75 | 0 |
| NDUFC1   | 3.56E-79 | -0.944634387 | 0.134 | 0.311 | 8.18E-75 | 0 |
| C1QA     | 5.08E-79 | -1.77686517  | 0.129 | 0.286 | 1.17E-74 | 0 |
| CLEC2D   | 6.40E-79 | 0.653189526  | 0.426 | 0.271 | 1.47E-74 | 0 |
| PPP1R2   | 7.32E-79 | 0.75030613   | 0.439 | 0.314 | 1.68E-74 | 0 |
| PRDX1    | 3.43E-78 | -0.877702723 | 0.259 | 0.447 | 7.89E-74 | 0 |
| CTSB     | 1.03E-77 | -0.97505354  | 0.174 | 0.34  | 2.37E-73 | 0 |
| TMEM173  | 3.43E-77 | 0.769523432  | 0.323 | 0.198 | 7.88E-73 | 0 |
| AP2S1    | 1.60E-76 | -0.595457173 | 0.164 | 0.354 | 3.67E-72 | 0 |
| LST1     | 2.60E-76 | -1.115956061 | 0.111 | 0.261 | 5.98E-72 | 0 |
| HSP90B1  | 5.16E-76 | -0.779220261 | 0.262 | 0.449 | 1.19E-71 | 0 |
| TNFAIP8  | 1.44E-75 | 0.698460695  | 0.315 | 0.187 | 3.30E-71 | 0 |
| STK17B   | 6.09E-74 | 0.670519191  | 0.502 | 0.37  | 1.40E-69 | 0 |
| FAM129A  | 3.16E-73 | 0.713909893  | 0.301 | 0.177 | 7.27E-69 | 0 |
| PLIN2    | 4.54E-73 | -1.247766369 | 0.204 | 0.375 | 1.04E-68 | 0 |
| NAMPT    | 5.59E-73 | -0.84382974  | 0.11  | 0.269 | 1.28E-68 | 0 |
| CD59     | 1.23E-72 | -1.392094262 | 0.115 | 0.268 | 2.83E-68 | 0 |
| PARP8    | 2.45E-72 | 0.692740353  | 0.305 | 0.175 | 5.64E-68 | 0 |
| C1QB     | 7.60E-72 | -1.854670502 | 0.122 | 0.269 | 1.75E-67 | 0 |
| ALDOA    | 8.10E-72 | -0.887700701 | 0.524 | 0.67  | 1.86E-67 | 0 |
| NKG7     | 3.61E-71 | -1.450070314 | 0.321 | 0.459 | 8.29E-67 | 0 |
| ATP6V0B  | 3.61E-69 | -0.615203788 | 0.164 | 0.335 | 8.30E-65 | 0 |
| CLTA     | 1.06E-68 | -0.552014151 | 0.155 | 0.331 | 2.44E-64 | 0 |
| EMB      | 1.51E-68 | 0.693524971  | 0.366 | 0.241 | 3.46E-64 | 0 |
| GNG5     | 2.94E-67 | -0.576113454 | 0.21  | 0.394 | 6.75E-63 | 0 |
| SAMSN1   | 4.55E-67 | 0.582865597  | 0.422 | 0.293 | 1.05E-62 | 0 |
| CMC1     | 2.88E-64 | -0.985193393 | 0.167 | 0.32  | 6.63E-60 | 0 |
| HLA-DRB5 | 5.17E-64 | -1.496081002 | 0.268 | 0.404 | 1.19E-59 | 0 |
| CNOT6L   | 9.52E-64 | 0.678027045  | 0.321 | 0.201 | 2.19E-59 | 0 |
| FKBP2    | 5.25E-63 | -0.613471392 | 0.119 | 0.272 | 1.21E-58 | 0 |
| AP1S2    | 2.56E-62 | -0.638298868 | 0.113 | 0.258 | 5.88E-58 | 0 |
| RNF19A   | 3.03E-62 | 0.656213306  | 0.373 | 0.248 | 6.97E-58 | 0 |
| CTSD     | 3.39E-62 | -0.816266846 | 0.31  | 0.475 | 7.80E-58 | 0 |
| SLIRP    | 5.50E-62 | -0.563504792 | 0.148 | 0.312 | 1.26E-57 | 0 |
| CTSS     | 3.79E-61 | -1.040835977 | 0.258 | 0.394 | 8.71E-57 | 0 |
| LYAR     | 5.57E-61 | 0.631867014  | 0.288 | 0.172 | 1.28E-56 | 0 |
| MT2A     | 1.77E-60 | -1.867192166 | 0.572 | 0.685 | 4.07E-56 | 0 |
| BTG2     | 1.79E-60 | 0.586683328  | 0.449 | 0.33  | 4.12E-56 | 0 |
| RGS2     | 2.08E-60 | -0.9593072   | 0.221 | 0.369 | 4.79E-56 | 0 |
| TOB1     | 1.71E-59 | 0.782416709  | 0.265 | 0.156 | 3.92E-55 | 0 |

|           |          |              |       |       |          |   |
|-----------|----------|--------------|-------|-------|----------|---|
| RHOC      | 3.37E-59 | -0.618322212 | 0.193 | 0.362 | 7.75E-55 | 0 |
| APOE      | 3.88E-59 | -2.199859659 | 0.328 | 0.47  | 8.92E-55 | 0 |
| ELF1      | 4.33E-59 | 0.58039693   | 0.514 | 0.419 | 9.95E-55 | 0 |
| CD48      | 1.03E-58 | 0.53148082   | 0.463 | 0.349 | 2.36E-54 | 0 |
| SNX3      | 2.74E-58 | -0.6171641   | 0.25  | 0.424 | 6.29E-54 | 0 |
| SAT1      | 4.12E-58 | -1.036046769 | 0.571 | 0.649 | 9.47E-54 | 0 |
| DSTN      | 5.55E-58 | -1.026722886 | 0.194 | 0.341 | 1.27E-53 | 0 |
| SLC2A3    | 6.66E-58 | 0.531623309  | 0.358 | 0.237 | 1.53E-53 | 0 |
| RTN4      | 7.79E-58 | -0.553424425 | 0.222 | 0.388 | 1.79E-53 | 0 |
| IGFBP3    | 2.51E-57 | -1.956087344 | 0.142 | 0.274 | 5.76E-53 | 0 |
| PLP2      | 2.82E-57 | 0.542802836  | 0.382 | 0.269 | 6.48E-53 | 0 |
| PDE4B     | 9.42E-57 | 0.640908474  | 0.256 | 0.153 | 2.17E-52 | 0 |
| CANX      | 1.09E-56 | -0.502488036 | 0.174 | 0.337 | 2.51E-52 | 0 |
| TIMP1     | 3.58E-56 | -1.20167512  | 0.204 | 0.347 | 8.23E-52 | 0 |
| GLRX      | 4.21E-55 | -0.504646487 | 0.175 | 0.334 | 9.67E-51 | 0 |
| GSTO1     | 4.26E-55 | -0.561976394 | 0.197 | 0.36  | 9.79E-51 | 0 |
| FYN       | 4.96E-55 | 0.519335879  | 0.36  | 0.238 | 1.14E-50 | 0 |
| PRDX6     | 6.49E-55 | -0.588533112 | 0.198 | 0.363 | 1.49E-50 | 0 |
| BNIP3L    | 9.33E-55 | -0.560844636 | 0.122 | 0.264 | 2.15E-50 | 0 |
| SYNE2     | 1.11E-54 | 0.507347534  | 0.43  | 0.303 | 2.54E-50 | 0 |
| LINC-PINT | 1.11E-54 | 0.652604567  | 0.287 | 0.182 | 2.54E-50 | 0 |
| FOXP1     | 1.13E-54 | 0.711952389  | 0.338 | 0.234 | 2.59E-50 | 0 |
| CELF2     | 2.74E-54 | 0.539106159  | 0.514 | 0.4   | 6.29E-50 | 0 |
| RNASET2   | 5.60E-54 | -0.936328048 | 0.26  | 0.391 | 1.29E-49 | 0 |
| HMGN3     | 4.61E-53 | -0.503160244 | 0.183 | 0.342 | 1.06E-48 | 0 |
| PPT1      | 1.60E-51 | -0.559458358 | 0.138 | 0.272 | 3.67E-47 | 0 |
| SOCS1     | 2.09E-51 | 0.566161679  | 0.262 | 0.157 | 4.81E-47 | 0 |
| ARHGAP15  | 3.44E-51 | 0.637647898  | 0.314 | 0.215 | 7.91E-47 | 0 |
| ID2       | 8.69E-51 | 0.573517094  | 0.627 | 0.545 | 2.00E-46 | 0 |
| GPX4      | 9.48E-51 | -0.696191129 | 0.346 | 0.486 | 2.18E-46 | 0 |
| PBXIP1    | 5.29E-50 | 0.540143048  | 0.273 | 0.169 | 1.22E-45 | 0 |
| CAPZA2    | 5.95E-50 | -0.531716627 | 0.189 | 0.348 | 1.37E-45 | 0 |
| HSPD1     | 1.87E-49 | -0.532420526 | 0.179 | 0.327 | 4.30E-45 | 0 |
| PRDM1     | 2.20E-49 | 0.703563882  | 0.372 | 0.268 | 5.05E-45 | 0 |
| TUBB      | 5.18E-49 | -0.689559919 | 0.231 | 0.383 | 1.19E-44 | 0 |
| KIAA1551  | 1.28E-48 | 0.609084989  | 0.416 | 0.312 | 2.95E-44 | 0 |
| GLUL      | 1.75E-48 | -0.848159413 | 0.206 | 0.336 | 4.01E-44 | 0 |
| CALR      | 6.42E-48 | -0.566625998 | 0.317 | 0.481 | 1.47E-43 | 0 |
| VDAC1     | 9.55E-48 | -0.543538592 | 0.166 | 0.31  | 2.19E-43 | 0 |
| NEAT1     | 2.87E-47 | -0.760245598 | 0.778 | 0.746 | 6.59E-43 | 0 |
| ZC3HAV1   | 8.40E-47 | 0.663080461  | 0.284 | 0.187 | 1.93E-42 | 0 |
| DDX24     | 4.35E-46 | 0.504250834  | 0.515 | 0.439 | 9.99E-42 | 0 |
| DBI       | 4.40E-46 | -0.554886077 | 0.302 | 0.459 | 1.01E-41 | 0 |
| RPS27L    | 7.09E-46 | -0.674384547 | 0.357 | 0.507 | 1.63E-41 | 0 |
| POMP      | 8.89E-46 | -0.604170977 | 0.326 | 0.485 | 2.04E-41 | 0 |
| RHOH      | 1.18E-44 | 0.542284705  | 0.304 | 0.204 | 2.72E-40 | 0 |
| LAMTOR5   | 1.23E-44 | -0.564352092 | 0.227 | 0.381 | 2.83E-40 | 0 |
| YPEL5     | 2.21E-44 | 0.537336293  | 0.412 | 0.324 | 5.08E-40 | 0 |
| PIK3R1    | 1.70E-43 | 0.635351792  | 0.377 | 0.288 | 3.91E-39 | 0 |
| ZFAND5    | 3.53E-41 | -0.503416627 | 0.203 | 0.338 | 8.12E-37 | 0 |
| ATP6V1F   | 5.21E-40 | -0.515681147 | 0.237 | 0.383 | 1.20E-35 | 0 |
| TUBA1B    | 1.40E-39 | -0.771436268 | 0.318 | 0.443 | 3.23E-35 | 0 |
| VAMP5     | 2.71E-39 | -0.599690396 | 0.205 | 0.338 | 6.22E-35 | 0 |
| MGST3     | 1.79E-38 | -0.608427245 | 0.205 | 0.336 | 4.10E-34 | 0 |
| ENO1      | 1.86E-38 | -0.863187596 | 0.503 | 0.62  | 4.28E-34 | 0 |
| TAGAP     | 2.34E-38 | 0.514308029  | 0.257 | 0.167 | 5.38E-34 | 0 |
| SEPW1     | 3.83E-38 | -0.638921159 | 0.25  | 0.392 | 8.81E-34 | 0 |
| LGALS1    | 1.20E-37 | -0.846682328 | 0.499 | 0.594 | 2.75E-33 | 0 |

|          |           |              |       |       |           |   |
|----------|-----------|--------------|-------|-------|-----------|---|
| ARL4C    | 1.97E-36  | 0.507163371  | 0.285 | 0.193 | 4.53E-32  | 0 |
| ANKRD12  | 2.06E-36  | 0.517467143  | 0.438 | 0.374 | 4.73E-32  | 0 |
| ANXA2    | 2.46E-36  | -0.714941599 | 0.3   | 0.421 | 5.65E-32  | 0 |
| ITM2B    | 1.79E-32  | -0.563287853 | 0.778 | 0.78  | 4.12E-28  | 0 |
| NDUFB4   | 3.23E-32  | -0.536692891 | 0.305 | 0.442 | 7.42E-28  | 0 |
| SDCBP    | 8.43E-32  | -0.528542238 | 0.279 | 0.4   | 1.94E-27  | 0 |
| HNRNPUL1 | 1.81E-31  | 0.588356297  | 0.286 | 0.217 | 4.16E-27  | 0 |
| IKZF1    | 2.37E-31  | 0.516080772  | 0.303 | 0.226 | 5.45E-27  | 0 |
| CSTB     | 2.73E-31  | -0.602507557 | 0.3   | 0.427 | 6.27E-27  | 0 |
| HSP90AB1 | 1.93E-30  | -0.51396422  | 0.534 | 0.622 | 4.43E-26  | 0 |
| MT1X     | 1.76E-29  | -2.022392702 | 0.208 | 0.305 | 4.05E-25  | 0 |
| 6-Sep    | 1.31E-28  | 0.516129817  | 0.331 | 0.262 | 3.01E-24  | 0 |
|          | 3.78E-27  | 0.516895808  | 0.373 | 0.305 | 8.68E-23  | 0 |
|          | 2.87E-26  | -0.537488738 | 0.363 | 0.49  | 6.60E-22  | 0 |
|          | 2.55E-23  | -0.98000315  | 0.508 | 0.6   | 5.86E-19  | 0 |
|          | 3.37E-23  | 0.528354653  | 0.302 | 0.246 | 7.74E-19  | 0 |
|          | 5.60E-23  | -0.674969443 | 0.789 | 0.766 | 1.29E-18  | 0 |
|          | 6.96E-22  | -0.508618078 | 0.176 | 0.266 | 1.60E-17  | 0 |
|          | 1.40E-20  | -0.946560888 | 0.433 | 0.527 | 3.21E-16  | 0 |
|          | 1.49E-19  | -2.031981127 | 0.194 | 0.268 | 3.43E-15  | 0 |
|          | 5.64E-17  | -0.527180574 | 0.316 | 0.412 | 1.30E-12  | 0 |
| TXN      | 4.83E-15  | -0.55903883  | 0.315 | 0.411 | 1.11E-10  | 0 |
| NR3C1    | 8.99E-14  | 0.517413601  | 0.259 | 0.223 | 2.07E-09  | 0 |
| RBPJ     | 1.49E-13  | 0.536460449  | 0.34  | 0.316 | 3.41E-09  | 0 |
| S100A11  | 2.43E-12  | -0.657558487 | 0.576 | 0.595 | 5.58E-08  | 0 |
| GNLY.1   | 0         | 4.504520706  | 0.9   | 0.184 | 0         | 1 |
| GZMB     | 0         | 3.414580159  | 0.751 | 0.079 | 0         | 1 |
| KLRD1    | 0         | 3.348997425  | 0.926 | 0.084 | 0         | 1 |
| FGFBP2   | 0         | 2.777833612  | 0.549 | 0.017 | 0         | 1 |
| PRF1     | 0         | 2.479451674  | 0.731 | 0.162 | 0         | 1 |
| NKG7.1   | 0         | 2.443413048  | 0.961 | 0.371 | 0         | 1 |
| KLRF1    | 0         | 2.37608845   | 0.491 | 0.015 | 0         | 1 |
| CCL4.1   | 0         | 2.167350763  | 0.906 | 0.391 | 0         | 1 |
| CLIC3    | 0         | 2.115485262  | 0.489 | 0.058 | 0         | 1 |
| GZMH     | 0         | 2.070645914  | 0.566 | 0.134 | 0         | 1 |
| SPON2    | 0         | 1.986892715  | 0.474 | 0.097 | 0         | 1 |
| PLAC8    | 0         | 1.967695752  | 0.536 | 0.094 | 0         | 1 |
| CD7      | 0         | 1.955882978  | 0.752 | 0.252 | 0         | 1 |
| KLRB1.1  | 0         | 1.934496134  | 0.637 | 0.167 | 0         | 1 |
| TRDC     | 0         | 1.875536367  | 0.366 | 0.023 | 0         | 1 |
| HOPX     | 0         | 1.826245902  | 0.564 | 0.107 | 0         | 1 |
| CST7     | 0         | 1.360937648  | 0.834 | 0.342 | 0         | 1 |
| S1PR5    | 0         | 1.224235308  | 0.254 | 0.007 | 0         | 1 |
| GZMM     | 1.37E-300 | 1.35894042   | 0.467 | 0.109 | 3.14E-296 | 1 |
| CD247    | 8.76E-299 | 1.537574079  | 0.613 | 0.201 | 2.01E-294 | 1 |
| MATK     | 1.62E-296 | 1.254609316  | 0.35  | 0.059 | 3.73E-292 | 1 |
| CTSW     | 2.78E-276 | 1.400323733  | 0.584 | 0.184 | 6.40E-272 | 1 |
| FCGR3A.1 | 3.80E-249 | 1.321790208  | 0.597 | 0.195 | 8.74E-245 | 1 |
| PTGDR    | 1.26E-232 | 0.998597538  | 0.253 | 0.037 | 2.90E-228 | 1 |
| SYTL3.1  | 6.97E-228 | 1.289442303  | 0.614 | 0.241 | 1.60E-223 | 1 |
| CCL5     | 2.08E-215 | 1.082883146  | 0.899 | 0.526 | 4.77E-211 | 1 |
| CMC1.1   | 2.14E-213 | 1.517669537  | 0.605 | 0.251 | 4.91E-209 | 1 |
| CCL3     | 2.69E-210 | 2.713236307  | 0.495 | 0.17  | 6.18E-206 | 1 |
| BIN2.1   | 1.33E-208 | 1.251997505  | 0.552 | 0.217 | 3.06E-204 | 1 |
| GZMA     | 5.63E-195 | 0.933490161  | 0.807 | 0.378 | 1.29E-190 | 1 |
| VIM.1    | 1.93E-183 | -1.758220622 | 0.579 | 0.791 | 4.43E-179 | 1 |
| XCL2     | 8.49E-183 | 1.225757699  | 0.333 | 0.081 | 1.95E-178 | 1 |
| TXK      | 1.91E-177 | 1.210608685  | 0.334 | 0.087 | 4.38E-173 | 1 |

|              |           |              |       |       |           |   |
|--------------|-----------|--------------|-------|-------|-----------|---|
| SAMD3        | 4.24E-177 | 1.08850678   | 0.364 | 0.102 | 9.73E-173 | 1 |
| KLRG1        | 4.65E-171 | 1.194744644  | 0.327 | 0.087 | 1.07E-166 | 1 |
| DUSP2.1      | 1.28E-168 | 1.111995916  | 0.755 | 0.397 | 2.93E-164 | 1 |
| GPR65        | 2.34E-166 | 1.207433618  | 0.464 | 0.182 | 5.37E-162 | 1 |
| HCST.1       | 2.62E-156 | 0.938771228  | 0.805 | 0.517 | 6.02E-152 | 1 |
| ZEB2.1       | 4.19E-156 | 1.159905913  | 0.496 | 0.213 | 9.62E-152 | 1 |
| PYHIN1       | 4.99E-154 | 1.070137992  | 0.47  | 0.177 | 1.15E-149 | 1 |
| LITAF        | 2.30E-149 | 1.006967937  | 0.631 | 0.339 | 5.28E-145 | 1 |
| MT-CO1       | 3.77E-142 | 0.526886926  | 0.999 | 0.918 | 8.67E-138 | 1 |
| IL2RB        | 1.67E-141 | 0.962418081  | 0.274 | 0.072 | 3.85E-137 | 1 |
| AREG         | 9.89E-140 | 2.003368852  | 0.446 | 0.184 | 2.27E-135 | 1 |
| CD69.1       | 7.57E-135 | 1.109261071  | 0.812 | 0.499 | 1.74E-130 | 1 |
| MT-CO2       | 1.09E-133 | 0.561144742  | 0.985 | 0.863 | 2.50E-129 | 1 |
| ID2.1        | 4.09E-132 | 0.913219567  | 0.805 | 0.539 | 9.40E-128 | 1 |
| TYROBP.1     | 7.41E-132 | 0.504782109  | 0.735 | 0.351 | 1.70E-127 | 1 |
| AKNA         | 7.51E-131 | 1.050971594  | 0.498 | 0.236 | 1.73E-126 | 1 |
| ADGRE5.1     | 2.81E-125 | 0.984302974  | 0.547 | 0.273 | 6.45E-121 | 1 |
| FTH1.1       | 2.39E-124 | -1.477240063 | 0.969 | 0.962 | 5.49E-120 | 1 |
| HLA-C        | 3.06E-122 | 0.505298301  | 0.985 | 0.872 | 7.04E-118 | 1 |
| FYN.1        | 4.65E-122 | 0.879748293  | 0.512 | 0.24  | 1.07E-117 | 1 |
| IRF1.1       | 6.87E-122 | 1.011113537  | 0.552 | 0.285 | 1.58E-117 | 1 |
| MYL12A       | 6.97E-121 | 0.73047169   | 0.877 | 0.67  | 1.60E-116 | 1 |
| CD74.1       | 6.59E-118 | -2.164522936 | 0.724 | 0.801 | 1.51E-113 | 1 |
| MAPK1        | 6.91E-116 | 1.050734396  | 0.355 | 0.139 | 1.59E-111 | 1 |
| KLF2         | 3.37E-115 | 1.15038372   | 0.426 | 0.186 | 7.74E-111 | 1 |
| TRGC2        | 1.55E-114 | 0.948802351  | 0.271 | 0.079 | 3.55E-110 | 1 |
| AC092580.4.1 | 1.49E-113 | 0.968628754  | 0.406 | 0.159 | 3.43E-109 | 1 |
| CHST12       | 9.24E-111 | 0.856521048  | 0.426 | 0.186 | 2.12E-106 | 1 |
| MYO1F        | 1.26E-108 | 0.943501196  | 0.48  | 0.249 | 2.90E-104 | 1 |
| HLA-E        | 1.53E-106 | 0.542472823  | 0.951 | 0.772 | 3.52E-102 | 1 |
| IER2         | 1.18E-105 | 1.013125692  | 0.621 | 0.378 | 2.72E-101 | 1 |
| IFITM1       | 4.41E-105 | 0.954921797  | 0.384 | 0.16  | 1.01E-100 | 1 |
| MBP          | 9.28E-104 | 1.014335465  | 0.352 | 0.147 | 2.13E-99  | 1 |
| GAPDH.1      | 4.00E-103 | -1.249366923 | 0.831 | 0.87  | 9.18E-99  | 1 |
| ANXA1.1      | 9.60E-102 | 1.005393537  | 0.697 | 0.447 | 2.21E-97  | 1 |
| ZAP70        | 4.49E-101 | 0.762844029  | 0.269 | 0.088 | 1.03E-96  | 1 |
| HLA-DRB1.1   | 1.18E-99  | -2.335845252 | 0.393 | 0.611 | 2.71E-95  | 1 |
| PPP2R5C.1    | 4.35E-99  | 0.823267278  | 0.609 | 0.367 | 9.99E-95  | 1 |
| CCND3.1      | 1.02E-97  | 0.788321848  | 0.572 | 0.337 | 2.36E-93  | 1 |
| SRGN         | 1.19E-91  | 0.501767157  | 0.966 | 0.773 | 2.73E-87  | 1 |
| ARL4C.1      | 4.14E-91  | 0.909043081  | 0.407 | 0.194 | 9.50E-87  | 1 |
| HLA-DRA.1    | 8.16E-91  | -2.541503258 | 0.524 | 0.689 | 1.88E-86  | 1 |
| CD53.1       | 3.84E-90  | 0.707449984  | 0.683 | 0.448 | 8.82E-86  | 1 |
| RUNX3.1      | 8.61E-90  | 0.773042526  | 0.411 | 0.188 | 1.98E-85  | 1 |
| PTPN4        | 1.64E-89  | 0.809074009  | 0.306 | 0.119 | 3.77E-85  | 1 |
| RAC2.1       | 4.91E-89  | 0.770696635  | 0.583 | 0.35  | 1.13E-84  | 1 |
| FKBP11.1     | 7.49E-86  | 0.833780303  | 0.339 | 0.143 | 1.72E-81  | 1 |
| STK4.1       | 1.67E-84  | 0.621524989  | 0.683 | 0.45  | 3.85E-80  | 1 |
| RNF125       | 1.32E-83  | 0.763933751  | 0.283 | 0.108 | 3.04E-79  | 1 |
| CLEC2B       | 6.46E-81  | 0.749285869  | 0.563 | 0.359 | 1.49E-76  | 1 |
| COTL1        | 7.04E-81  | -1.255388009 | 0.199 | 0.459 | 1.62E-76  | 1 |
| SUN2         | 3.28E-80  | 0.784143915  | 0.372 | 0.18  | 7.55E-76  | 1 |
| PIP4K2A      | 1.37E-79  | 0.747095285  | 0.406 | 0.201 | 3.15E-75  | 1 |
| HLA-DQB1.1   | 5.89E-79  | -1.833129915 | 0.17  | 0.416 | 1.35E-74  | 1 |
| RBM39        | 2.44E-77  | 0.679586747  | 0.703 | 0.529 | 5.61E-73  | 1 |
| LYAR.1       | 5.54E-76  | 0.89611571   | 0.369 | 0.181 | 1.27E-71  | 1 |
| ISG20.1      | 2.21E-71  | 0.646615972  | 0.552 | 0.341 | 5.09E-67  | 1 |
| HSPB1.1      | 1.18E-70  | -1.525745617 | 0.215 | 0.458 | 2.71E-66  | 1 |

|                 |          |              |       |       |          |   |
|-----------------|----------|--------------|-------|-------|----------|---|
| GNG2            | 1.83E-70 | 0.742528202  | 0.295 | 0.129 | 4.20E-66 | 1 |
| RORA.1          | 4.36E-70 | 0.642067983  | 0.4   | 0.199 | 1.00E-65 | 1 |
| TLE4            | 1.22E-69 | 0.746515123  | 0.352 | 0.172 | 2.80E-65 | 1 |
| TSC22D3.1       | 1.52E-69 | 0.532712648  | 0.911 | 0.767 | 3.49E-65 | 1 |
| S100A11.1       | 2.22E-69 | -1.373102169 | 0.435 | 0.607 | 5.10E-65 | 1 |
| EVL.1           | 5.70E-69 | 0.662650617  | 0.671 | 0.477 | 1.31E-64 | 1 |
| CCL4L2          | 1.02E-68 | 1.18132208   | 0.361 | 0.174 | 2.35E-64 | 1 |
| SYNE1           | 1.09E-67 | 0.787855247  | 0.318 | 0.15  | 2.50E-63 | 1 |
| ANXA5.1         | 1.68E-66 | -1.04026112  | 0.133 | 0.375 | 3.85E-62 | 1 |
| CYBA            | 2.14E-66 | 0.506997138  | 0.861 | 0.669 | 4.91E-62 | 1 |
| CD27            | 3.67E-65 | -1.391511413 | 0.078 | 0.287 | 8.43E-61 | 1 |
| RAP1B           | 5.06E-65 | 0.758292747  | 0.476 | 0.308 | 1.16E-60 | 1 |
| TAGAP.1         | 2.73E-64 | 0.717576432  | 0.346 | 0.171 | 6.29E-60 | 1 |
| GPX1.1          | 7.00E-64 | -1.812209021 | 0.242 | 0.449 | 1.61E-59 | 1 |
| FTL.1           | 1.05E-63 | -1.506990068 | 0.957 | 0.935 | 2.41E-59 | 1 |
| HLA-DMA.1       | 4.57E-63 | -1.296487115 | 0.095 | 0.308 | 1.05E-58 | 1 |
| CST3.1          | 5.25E-63 | -2.128669951 | 0.204 | 0.405 | 1.21E-58 | 1 |
| STAT4           | 2.05E-62 | 0.607774718  | 0.258 | 0.106 | 4.70E-58 | 1 |
| PRDX1.1         | 6.38E-62 | -1.148102276 | 0.19  | 0.426 | 1.47E-57 | 1 |
| PIK3R1.1        | 1.26E-61 | 0.844841755  | 0.465 | 0.292 | 2.90E-57 | 1 |
| SERPINA1.1      | 2.00E-59 | -1.610540271 | 0.092 | 0.298 | 4.60E-55 | 1 |
| HLA-DRB5.1      | 6.81E-59 | -1.884866442 | 0.186 | 0.393 | 1.56E-54 | 1 |
| TBC1D10C.1      | 3.02E-58 | 0.653050634  | 0.394 | 0.215 | 6.94E-54 | 1 |
| RARRES3.1       | 1.06E-57 | 0.557376936  | 0.583 | 0.392 | 2.43E-53 | 1 |
| GNPTAB          | 2.75E-57 | 0.753348928  | 0.292 | 0.146 | 6.32E-53 | 1 |
| CTD-3252C9.4.1  | 2.77E-56 | 0.749170323  | 0.352 | 0.186 | 6.36E-52 | 1 |
| CH17-189H20.1.1 | 1.01E-55 | 0.681115912  | 0.384 | 0.219 | 2.32E-51 | 1 |
| CYTIP.1         | 3.12E-55 | 0.515031293  | 0.652 | 0.457 | 7.17E-51 | 1 |
| EFHD2           | 3.43E-55 | 0.792122377  | 0.273 | 0.135 | 7.88E-51 | 1 |
| AES             | 1.05E-54 | 0.715098794  | 0.395 | 0.236 | 2.42E-50 | 1 |
| LGALS3.1        | 1.20E-54 | -1.001123821 | 0.068 | 0.264 | 2.76E-50 | 1 |
| PLEK            | 1.35E-54 | 0.731563133  | 0.281 | 0.138 | 3.10E-50 | 1 |
| VAMP2.1         | 7.90E-54 | 0.550336935  | 0.61  | 0.45  | 1.82E-49 | 1 |
| ARHGAP9         | 1.97E-53 | 0.704428433  | 0.32  | 0.169 | 4.52E-49 | 1 |
| HLA-DPA1.1      | 1.42E-52 | -1.95702024  | 0.442 | 0.584 | 3.27E-48 | 1 |
| CTSB.1          | 1.59E-52 | -1.130106859 | 0.121 | 0.321 | 3.65E-48 | 1 |
| ATM             | 1.15E-51 | 0.767751744  | 0.383 | 0.235 | 2.65E-47 | 1 |
| TYMP.1          | 2.97E-51 | -1.036548358 | 0.117 | 0.314 | 6.81E-47 | 1 |
| SELPLG          | 1.37E-50 | 0.690849224  | 0.277 | 0.139 | 3.15E-46 | 1 |
| BTG2.1          | 3.72E-50 | 0.69026246   | 0.508 | 0.341 | 8.56E-46 | 1 |
| RNASET2.1       | 4.84E-50 | -1.206422207 | 0.187 | 0.379 | 1.11E-45 | 1 |
| APMAP           | 6.21E-50 | 0.706422298  | 0.343 | 0.199 | 1.43E-45 | 1 |
| LTB.1           | 8.08E-50 | -1.250017647 | 0.132 | 0.319 | 1.86E-45 | 1 |
| FCGRT.1         | 1.00E-49 | -1.048942666 | 0.077 | 0.259 | 2.30E-45 | 1 |
| HLA-DQA1.1      | 1.96E-48 | -1.704317734 | 0.182 | 0.361 | 4.51E-44 | 1 |
| ETS1.1          | 1.00E-47 | 0.512753181  | 0.506 | 0.321 | 2.30E-43 | 1 |
| NPC2.1          | 1.41E-47 | -1.463639658 | 0.218 | 0.396 | 3.23E-43 | 1 |
| RP5-117110.5    | 1.44E-47 | 0.67716138   | 0.259 | 0.127 | 3.31E-43 | 1 |
| LCP1.1          | 3.26E-47 | 0.558485692  | 0.546 | 0.389 | 7.50E-43 | 1 |
| EIF3G           | 4.06E-47 | 0.609669548  | 0.535 | 0.408 | 9.34E-43 | 1 |
| AIF1.1          | 8.13E-47 | -1.542138773 | 0.104 | 0.276 | 1.87E-42 | 1 |
| GRN.1           | 1.11E-46 | -1.092707982 | 0.093 | 0.271 | 2.54E-42 | 1 |
| ITGB2           | 1.18E-46 | 0.644009973  | 0.559 | 0.4   | 2.70E-42 | 1 |
| ABI3            | 2.77E-46 | 0.66818437   | 0.294 | 0.163 | 6.36E-42 | 1 |
| S100A6          | 3.47E-46 | -0.934861279 | 0.71  | 0.772 | 7.98E-42 | 1 |
| NR4A2           | 6.35E-46 | 0.688601388  | 0.415 | 0.262 | 1.46E-41 | 1 |
| CDC42SE1.1      | 1.52E-45 | 0.642546087  | 0.375 | 0.225 | 3.48E-41 | 1 |
| LINC00869       | 2.16E-45 | 0.625434985  | 0.269 | 0.138 | 4.97E-41 | 1 |

|            |          |              |       |       |          |   |
|------------|----------|--------------|-------|-------|----------|---|
| IFITM3.1   | 3.39E-45 | -1.71170248  | 0.215 | 0.396 | 7.79E-41 | 1 |
| PPT1.1     | 3.51E-45 | -0.793945389 | 0.082 | 0.258 | 8.07E-41 | 1 |
| CORO1B.1   | 5.94E-45 | -0.690665562 | 0.076 | 0.257 | 1.37E-40 | 1 |
| LYZ.1      | 3.43E-44 | -2.429199927 | 0.203 | 0.367 | 7.87E-40 | 1 |
| PTMS.1     | 4.35E-44 | -0.878057279 | 0.084 | 0.258 | 1.00E-39 | 1 |
| ZFP36.1    | 1.29E-43 | 0.578392857  | 0.793 | 0.65  | 2.96E-39 | 1 |
| PKM.1      | 1.58E-43 | -1.022872041 | 0.26  | 0.452 | 3.62E-39 | 1 |
| PTGER4.1   | 1.99E-43 | 0.658457843  | 0.355 | 0.208 | 4.58E-39 | 1 |
| ADIRF.1    | 5.91E-43 | -1.972746532 | 0.091 | 0.257 | 1.36E-38 | 1 |
| NNMT.1     | 1.77E-42 | -2.028455662 | 0.14  | 0.316 | 4.07E-38 | 1 |
| C1orf56    | 2.78E-42 | 0.724650488  | 0.316 | 0.173 | 6.39E-38 | 1 |
| PTPN7.1    | 4.96E-42 | 0.584373638  | 0.356 | 0.207 | 1.14E-37 | 1 |
| ARPC5L     | 1.79E-41 | 0.578298427  | 0.358 | 0.219 | 4.11E-37 | 1 |
| TIMP1.1    | 1.99E-41 | -1.348324837 | 0.153 | 0.331 | 4.58E-37 | 1 |
| AOAH       | 3.73E-41 | 0.664941355  | 0.253 | 0.134 | 8.57E-37 | 1 |
| ARHGEF1.1  | 5.26E-41 | 0.534131022  | 0.39  | 0.249 | 1.21E-36 | 1 |
| WIPF1.1    | 7.58E-41 | 0.547281868  | 0.468 | 0.33  | 1.74E-36 | 1 |
| SOD2.1     | 1.19E-40 | -1.372091277 | 0.135 | 0.31  | 2.73E-36 | 1 |
| IQGAP2     | 3.59E-40 | 0.623454605  | 0.289 | 0.163 | 8.24E-36 | 1 |
| NDUFA4L2.1 | 1.01E-39 | -2.150575946 | 0.141 | 0.304 | 2.32E-35 | 1 |
| YWHAH.1    | 2.53E-39 | -1.082648181 | 0.132 | 0.299 | 5.80E-35 | 1 |
| RGS10      | 3.52E-39 | -0.737060568 | 0.139 | 0.312 | 8.08E-35 | 1 |
| ENO1.1     | 1.03E-38 | -1.212167921 | 0.466 | 0.607 | 2.38E-34 | 1 |
| NDUFC1.1   | 2.26E-38 | -1.018494718 | 0.116 | 0.287 | 5.19E-34 | 1 |
| GPATCH8    | 2.84E-38 | 0.686099442  | 0.343 | 0.216 | 6.53E-34 | 1 |
| LIMD2      | 3.06E-38 | 0.554131287  | 0.436 | 0.297 | 7.04E-34 | 1 |
| CRYAB.1    | 8.75E-38 | -1.823524835 | 0.114 | 0.274 | 2.01E-33 | 1 |
| C9orf142.1 | 1.49E-37 | 0.59416792   | 0.376 | 0.249 | 3.43E-33 | 1 |
| DOK2       | 3.01E-37 | 0.566968413  | 0.254 | 0.136 | 6.92E-33 | 1 |
| IKZF1.1    | 6.36E-37 | 0.553004896  | 0.364 | 0.231 | 1.46E-32 | 1 |
| ITM2B.1    | 8.02E-37 | -0.756870122 | 0.796 | 0.777 | 1.84E-32 | 1 |
| RSRP1.1    | 9.25E-37 | 0.518534268  | 0.523 | 0.401 | 2.13E-32 | 1 |
| PRKCH      | 9.44E-37 | 0.514024185  | 0.376 | 0.24  | 2.17E-32 | 1 |
| FKBP1A.1   | 1.01E-36 | -1.037758241 | 0.251 | 0.43  | 2.32E-32 | 1 |
| PARP8.1    | 2.35E-36 | 0.527270606  | 0.325 | 0.192 | 5.39E-32 | 1 |
| LIMS1.1    | 7.51E-36 | -0.587204429 | 0.102 | 0.264 | 1.73E-31 | 1 |
| GPX4.1     | 8.53E-36 | -0.896779973 | 0.309 | 0.469 | 1.96E-31 | 1 |
| NFKBIA.1   | 8.75E-35 | 0.664114411  | 0.663 | 0.547 | 2.01E-30 | 1 |
| SOCS1.1    | 1.81E-34 | 0.542584686  | 0.293 | 0.169 | 4.15E-30 | 1 |
| TMEM2      | 3.63E-34 | 0.543888674  | 0.289 | 0.167 | 8.34E-30 | 1 |
| RAC1.1     | 5.61E-34 | -0.928157893 | 0.32  | 0.462 | 1.29E-29 | 1 |
| FLNA       | 1.10E-33 | 0.539764713  | 0.287 | 0.173 | 2.53E-29 | 1 |
| RBPJ.1     | 2.88E-33 | -0.716402101 | 0.168 | 0.337 | 6.61E-29 | 1 |
| RGS1.1     | 2.42E-32 | -0.886923549 | 0.671 | 0.699 | 5.55E-28 | 1 |
| JAK1       | 3.43E-32 | 0.599027128  | 0.485 | 0.386 | 7.88E-28 | 1 |
| LGALS1.1   | 3.44E-31 | -1.035963737 | 0.458 | 0.584 | 7.90E-27 | 1 |
| S100A10    | 1.79E-30 | -1.003992906 | 0.53  | 0.618 | 4.12E-26 | 1 |
| CNOT6L.1   | 2.26E-30 | 0.51523949   | 0.337 | 0.217 | 5.19E-26 | 1 |
| SPN        | 7.87E-30 | 0.530152695  | 0.255 | 0.148 | 1.81E-25 | 1 |
| APOC1.1    | 1.20E-29 | -1.819351867 | 0.16  | 0.297 | 2.75E-25 | 1 |
| CD47       | 2.18E-29 | 0.552703884  | 0.336 | 0.233 | 5.02E-25 | 1 |
| ANXA2.1    | 6.43E-29 | -0.899930924 | 0.256 | 0.408 | 1.48E-24 | 1 |
| CD84       | 7.01E-29 | -0.508386603 | 0.11  | 0.253 | 1.61E-24 | 1 |
| PLIN2.1    | 1.75E-28 | -1.213961287 | 0.2   | 0.35  | 4.02E-24 | 1 |
| HLA-DPB1.1 | 2.00E-28 | -1.665707065 | 0.587 | 0.637 | 4.60E-24 | 1 |
| IGFBP3.1   | 5.70E-28 | -2.024564236 | 0.127 | 0.256 | 1.31E-23 | 1 |
| ALDOA.1    | 2.16E-27 | -0.905461174 | 0.555 | 0.646 | 4.97E-23 | 1 |
| IDI1       | 2.97E-27 | 0.504615399  | 0.291 | 0.187 | 6.83E-23 | 1 |



|           |           |              |       |       |             |   |
|-----------|-----------|--------------|-------|-------|-------------|---|
| DUSP4.1   | 5.53E-27  | -0.826933119 | 0.124 | 0.253 | 1.27E-22    | 1 |
| GZMK.1    | 7.47E-27  | -1.411937483 | 0.263 | 0.376 | 1.72E-22    | 1 |
| TXN.1     | 1.11E-26  | -0.899561503 | 0.251 | 0.404 | 2.55E-22    | 1 |
| MT1X.1    | 3.00E-26  | -2.14961381  | 0.163 | 0.296 | 6.90E-22    | 1 |
| YWHAE.1   | 4.15E-26  | -0.665638759 | 0.173 | 0.327 | 9.53E-22    | 1 |
| MGST3.1   | 6.63E-26  | -0.721328291 | 0.174 | 0.32  | 1.52E-21    | 1 |
| SAT1.1    | 7.02E-26  | -1.091790048 | 0.587 | 0.636 | 1.61E-21    | 1 |
| REL       | 1.09E-25  | 0.55481      | 0.418 | 0.312 | 2.51E-21    | 1 |
| RPS27L.1  | 2.93E-25  | -0.843674274 | 0.345 | 0.486 | 6.72E-21    | 1 |
| MT2A.1    | 3.40E-25  | -1.793611813 | 0.576 | 0.668 | 7.82E-21    | 1 |
| C1QA.1    | 6.30E-25  | -1.643348255 | 0.141 | 0.262 | 1.45E-20    | 1 |
| GSTO1.1   | 1.96E-24  | -0.587632295 | 0.185 | 0.337 | 4.50E-20    | 1 |
| HSBP1.1   | 2.07E-24  | -0.565214248 | 0.117 | 0.252 | 4.77E-20    | 1 |
| RHOB.1    | 6.74E-24  | -0.984791398 | 0.231 | 0.361 | 1.55E-19    | 1 |
| PSAP.1    | 1.59E-23  | -1.032454709 | 0.379 | 0.478 | 3.66E-19    | 1 |
| CD55      | 3.21E-23  | 0.510695009  | 0.263 | 0.172 | 7.37E-19    | 1 |
| DYNLL1.1  | 1.85E-22  | -0.639639006 | 0.272 | 0.424 | 4.24E-18    | 1 |
| LAPTM4A.1 | 2.26E-22  | -0.709764386 | 0.226 | 0.365 | 5.20E-18    | 1 |
| SLFN5     | 2.79E-22  | 0.511504622  | 0.292 | 0.196 | 6.40E-18    | 1 |
| APOE.1    | 3.20E-22  | -2.202681355 | 0.341 | 0.448 | 7.35E-18    | 1 |
| BIRC3.1   | 3.79E-22  | -0.761260788 | 0.161 | 0.284 | 8.71E-18    | 1 |
| PEBP1.1   | 7.64E-22  | -0.765069545 | 0.26  | 0.404 | 1.76E-17    | 1 |
| FMNL1     | 2.14E-21  | 0.509300433  | 0.262 | 0.177 | 4.92E-17    | 1 |
| NAP1L1    | 3.42E-21  | -0.561674787 | 0.467 | 0.575 | 7.86E-17    | 1 |
| HERPUD1.1 | 4.28E-21  | -0.790981532 | 0.399 | 0.502 | 9.85E-17    | 1 |
| CLTA.1    | 1.10E-20  | -0.518474785 | 0.168 | 0.304 | 2.52E-16    | 1 |
| RPLP0     | 2.24E-20  | -0.502956909 | 0.871 | 0.84  | 5.15E-16    | 1 |
| SOD1.1    | 2.74E-20  | -0.631245661 | 0.355 | 0.495 | 6.29E-16    | 1 |
| APLP2.1   | 7.36E-20  | -0.600766083 | 0.147 | 0.267 | 1.69E-15    | 1 |
| HINT1     | 1.04E-19  | -0.585255388 | 0.538 | 0.635 | 2.39E-15    | 1 |
| MIF.1     | 1.92E-19  | -1.123779991 | 0.399 | 0.517 | 4.42E-15    | 1 |
| VMP1      | 2.88E-19  | -0.550919362 | 0.2   | 0.333 | 6.61E-15    | 1 |
| SNX3.1    | 2.01E-16  | -0.551330256 | 0.268 | 0.396 | 4.61E-12    | 1 |
| CSTB.1    | 5.78E-16  | -0.646898471 | 0.284 | 0.41  | 1.33E-11    | 1 |
| LDHB.1    | 2.86E-15  | -0.520928383 | 0.36  | 0.478 | 6.57E-11    | 1 |
| LDHA.1    | 7.88E-15  | -1.083775795 | 0.511 | 0.586 | 1.81E-10    | 1 |
| S100A9.1  | 7.94E-15  | -2.202742054 | 0.168 | 0.26  | 1.82E-10    | 1 |
| TSPO.1    | 1.32E-13  | -0.504604036 | 0.331 | 0.43  | 3.03E-09    | 1 |
| VAMP5.1   | 2.94E-11  | -0.54703549  | 0.221 | 0.317 | 6.76E-07    | 1 |
| TP1.1     | 3.85E-11  | -0.773908754 | 0.506 | 0.571 | 8.86E-07    | 1 |
| TRAC.1    | 6.31E-10  | -0.640398036 | 0.389 | 0.437 | 1.45E-05    | 1 |
| NDUFB4.1  | 3.01E-09  | -0.512742192 | 0.321 | 0.42  | 6.91E-05    | 1 |
| TUBA1B.1  | 3.81E-09  | -0.690453188 | 0.349 | 0.421 | 8.74E-05    | 1 |
| TUBB.1    | 4.78E-08  | -0.553257657 | 0.274 | 0.356 | 0.001097496 | 1 |
| ZFAS1.1   | 1.30E-07  | -0.537741056 | 0.414 | 0.491 | 0.002992414 | 1 |
| SEPW1.1   | 2.11E-07  | -0.598322906 | 0.286 | 0.367 | 0.00485905  | 1 |
| PGK1.1    | 3.75E-07  | -0.509862168 | 0.376 | 0.458 | 0.008607529 | 1 |
| CTSS.1    | 9.87E-07  | -0.807034747 | 0.328 | 0.366 | 0.022682553 | 1 |
| GLUL.1    | 1.98E-06  | -0.621623764 | 0.259 | 0.311 | 0.045407077 | 1 |
| GZMK.2    | 0         | 2.333501979  | 0.903 | 0.316 | 0           | 2 |
| CCL5.1    | 0         | 1.734788642  | 0.967 | 0.525 | 0           | 2 |
| CD8A      | 2.40E-280 | 1.533642036  | 0.63  | 0.193 | 5.51E-276   | 2 |
| CCL4.2    | 2.87E-274 | 1.505940932  | 0.846 | 0.403 | 6.59E-270   | 2 |
| CD27.1    | 5.40E-265 | 1.527700935  | 0.662 | 0.231 | 1.24E-260   | 2 |
| GZMA.1    | 1.58E-255 | 1.376683621  | 0.835 | 0.381 | 3.63E-251   | 2 |
| CD8B      | 2.08E-240 | 1.443967711  | 0.527 | 0.152 | 4.78E-236   | 2 |
| RGS1.2    | 3.93E-240 | 1.283729333  | 0.956 | 0.673 | 9.02E-236   | 2 |
| CST7.1    | 2.36E-224 | 1.334719915  | 0.774 | 0.354 | 5.43E-220   | 2 |

|                |           |              |       |       |           |   |
|----------------|-----------|--------------|-------|-------|-----------|---|
| NKG7.2         | 1.81E-211 | 1.039741725  | 0.844 | 0.389 | 4.15E-207 | 2 |
| DUSP4.2        | 1.43E-201 | 1.372261871  | 0.579 | 0.21  | 3.29E-197 | 2 |
| CCL4L2.1       | 4.15E-198 | 1.799205287  | 0.498 | 0.164 | 9.54E-194 | 2 |
| CD3D.2         | 7.30E-194 | 1.121365372  | 0.839 | 0.441 | 1.68E-189 | 2 |
| DUSP2.2        | 1.35E-180 | 1.156250451  | 0.771 | 0.4   | 3.09E-176 | 2 |
| ITM2A.2        | 7.91E-174 | 1.450452584  | 0.615 | 0.283 | 1.82E-169 | 2 |
| CRTAM          | 2.37E-172 | 1.427408893  | 0.315 | 0.075 | 5.45E-168 | 2 |
| BTG1.2         | 1.26E-164 | 0.803136393  | 0.98  | 0.83  | 2.90E-160 | 2 |
| HLA-DQA2       | 3.22E-142 | 0.889723525  | 0.432 | 0.144 | 7.39E-138 | 2 |
| CXCR4.2        | 1.10E-140 | 0.815892586  | 0.956 | 0.759 | 2.53E-136 | 2 |
| CD2.1          | 5.92E-136 | 0.873874712  | 0.79  | 0.426 | 1.36E-131 | 2 |
| HLA-A          | 6.60E-130 | 0.611755844  | 0.977 | 0.886 | 1.52E-125 | 2 |
| CD3E.1         | 4.86E-129 | 0.97626453   | 0.68  | 0.372 | 1.12E-124 | 2 |
| TRAC.2         | 6.51E-115 | 0.766063791  | 0.74  | 0.404 | 1.50E-110 | 2 |
| TRBC2.1        | 8.62E-113 | 1.062427601  | 0.638 | 0.353 | 1.98E-108 | 2 |
| VIM.2          | 6.26E-112 | -1.443120658 | 0.613 | 0.785 | 1.44E-107 | 2 |
| RPS26.1        | 8.45E-106 | 0.555521796  | 0.966 | 0.861 | 1.94E-101 | 2 |
| FTH1.2         | 1.98E-104 | -1.480533081 | 0.952 | 0.963 | 4.55E-100 | 2 |
| APOBEC3G.1     | 1.19E-101 | 1.058743691  | 0.499 | 0.251 | 2.73E-97  | 2 |
| RP11-347P5.1.2 | 2.63E-99  | 0.967156901  | 0.608 | 0.354 | 6.05E-95  | 2 |
| TOX            | 5.08E-98  | 0.886880821  | 0.279 | 0.09  | 1.17E-93  | 2 |
| CMC1.2         | 1.35E-96  | 1.467521904  | 0.502 | 0.265 | 3.10E-92  | 2 |
| LYST.1         | 5.15E-95  | 1.111218906  | 0.437 | 0.208 | 1.18E-90  | 2 |
| TRBC1.1        | 5.85E-92  | 1.041277146  | 0.591 | 0.331 | 1.34E-87  | 2 |
| CD69.2         | 1.54E-91  | 0.666606513  | 0.775 | 0.506 | 3.55E-87  | 2 |
| CTSW.1         | 2.56E-88  | 0.870353729  | 0.441 | 0.202 | 5.88E-84  | 2 |
| LCK.2          | 3.96E-86  | 0.895988903  | 0.497 | 0.268 | 9.11E-82  | 2 |
| TPT1.1         | 1.75E-81  | -0.604456559 | 0.934 | 0.923 | 4.02E-77  | 2 |
| LAG3           | 3.86E-81  | 0.922344341  | 0.256 | 0.087 | 8.88E-77  | 2 |
| TNFRSF9        | 2.96E-75  | 0.859322566  | 0.252 | 0.088 | 6.80E-71  | 2 |
| SRSF7.1        | 1.69E-74  | 0.817492696  | 0.71  | 0.53  | 3.89E-70  | 2 |
| HCST.2         | 2.91E-72  | 0.710230451  | 0.723 | 0.528 | 6.69E-68  | 2 |
| EVL.2          | 3.20E-70  | 0.780525234  | 0.661 | 0.48  | 7.35E-66  | 2 |
| CD3G.1         | 7.82E-69  | 0.78087035   | 0.497 | 0.275 | 1.80E-64  | 2 |
| CORO1A.2       | 9.12E-69  | 0.663811529  | 0.736 | 0.549 | 2.10E-64  | 2 |
| PTPRC.2        | 6.03E-68  | 0.590423911  | 0.811 | 0.599 | 1.39E-63  | 2 |
| STK4.2         | 8.16E-65  | 0.785300461  | 0.628 | 0.458 | 1.87E-60  | 2 |
| TRAT1.1        | 2.43E-64  | 0.757144463  | 0.284 | 0.118 | 5.59E-60  | 2 |
| SIT1           | 1.51E-63  | 0.805995953  | 0.275 | 0.116 | 3.46E-59  | 2 |
| TIMP1.2        | 2.35E-63  | -1.556264715 | 0.091 | 0.335 | 5.39E-59  | 2 |
| ACAP1.2        | 1.64E-62  | 0.81569346   | 0.507 | 0.317 | 3.78E-58  | 2 |
| IFITM2.1       | 3.58E-61  | -1.292738636 | 0.234 | 0.497 | 8.24E-57  | 2 |
| TMEM123.1      | 3.91E-56  | -0.820710321 | 0.065 | 0.29  | 8.97E-52  | 2 |
| CCDC167        | 8.87E-56  | 0.846008139  | 0.32  | 0.162 | 2.04E-51  | 2 |
| CEBPD.2        | 1.11E-55  | -1.264758642 | 0.083 | 0.297 | 2.56E-51  | 2 |
| IFNGR1         | 2.52E-53  | -0.978719338 | 0.066 | 0.277 | 5.79E-49  | 2 |
| SUB1           | 6.68E-53  | 0.567694959  | 0.683 | 0.564 | 1.53E-48  | 2 |
| CCL3.1         | 1.09E-52  | 0.868012622  | 0.357 | 0.187 | 2.50E-48  | 2 |
| IFITM3.2       | 2.07E-52  | -1.71860529  | 0.174 | 0.397 | 4.77E-48  | 2 |
| ITM2C          | 8.42E-52  | 0.726046571  | 0.301 | 0.144 | 1.93E-47  | 2 |
| RARRES3.2      | 1.32E-51  | 0.704141037  | 0.557 | 0.397 | 3.04E-47  | 2 |
| IL2RG.2        | 6.96E-50  | 0.699706195  | 0.532 | 0.358 | 1.60E-45  | 2 |
| KIAA1551.1     | 3.37E-49  | 0.741423805  | 0.479 | 0.322 | 7.75E-45  | 2 |
| CD84.1         | 4.17E-49  | 0.888508542  | 0.375 | 0.227 | 9.59E-45  | 2 |
| RHOB.2         | 5.35E-49  | -1.380158151 | 0.155 | 0.366 | 1.23E-44  | 2 |
| CLEC2D.1       | 5.36E-49  | 0.763376755  | 0.459 | 0.292 | 1.23E-44  | 2 |
| SOD2.2         | 7.08E-49  | -1.457840299 | 0.102 | 0.311 | 1.63E-44  | 2 |
| SERPINA1.2     | 1.03E-48  | -1.548493469 | 0.095 | 0.295 | 2.37E-44  | 2 |

|             |          |              |       |       |          |   |
|-------------|----------|--------------|-------|-------|----------|---|
| DSTN.1      | 2.77E-48 | -1.19965549  | 0.112 | 0.325 | 6.36E-44 | 2 |
| TERF2IP.1   | 9.08E-47 | 0.76648508   | 0.485 | 0.354 | 2.09E-42 | 2 |
| XIST        | 2.14E-46 | 0.583361746  | 0.583 | 0.41  | 4.91E-42 | 2 |
| CST3.2      | 1.05E-44 | -1.898843618 | 0.22  | 0.401 | 2.41E-40 | 2 |
| TYROBP.2    | 5.74E-44 | -1.826624325 | 0.232 | 0.402 | 1.32E-39 | 2 |
| PYHIN1.1    | 7.58E-44 | 0.697612209  | 0.347 | 0.192 | 1.74E-39 | 2 |
| FCER1G.2    | 4.45E-43 | -1.503799815 | 0.138 | 0.318 | 1.02E-38 | 2 |
| TMSB10.1    | 4.48E-43 | -0.514556278 | 0.969 | 0.96  | 1.03E-38 | 2 |
| APLP2.2     | 1.96E-42 | -0.795875717 | 0.081 | 0.271 | 4.51E-38 | 2 |
| NNMT.2      | 3.71E-41 | -2.052252806 | 0.127 | 0.315 | 8.52E-37 | 2 |
| GRN.2       | 6.78E-41 | -1.0677958   | 0.091 | 0.269 | 1.56E-36 | 2 |
| RNASET2.2   | 7.96E-41 | -1.05358737  | 0.18  | 0.377 | 1.83E-36 | 2 |
| GZMH.1      | 1.80E-40 | 0.695208552  | 0.31  | 0.163 | 4.14E-36 | 2 |
| PSMB9       | 2.06E-40 | 0.580332156  | 0.585 | 0.475 | 4.74E-36 | 2 |
| GLUL.2      | 1.05E-39 | -1.095597367 | 0.135 | 0.322 | 2.41E-35 | 2 |
| S100A11.2   | 2.55E-39 | -1.132643811 | 0.452 | 0.603 | 5.86E-35 | 2 |
| TUBA4A.2    | 8.40E-39 | 0.594042999  | 0.409 | 0.26  | 1.93E-34 | 2 |
| ISG20.2     | 6.51E-37 | 0.576314052  | 0.485 | 0.35  | 1.50E-32 | 2 |
| PLIN2.2     | 8.57E-37 | -1.301467676 | 0.164 | 0.352 | 1.97E-32 | 2 |
| CYTIP.2     | 3.27E-36 | 0.517852043  | 0.6   | 0.464 | 7.51E-32 | 2 |
| LINC00152.1 | 3.95E-36 | 0.616799513  | 0.437 | 0.306 | 9.07E-32 | 2 |
| CTSB.2      | 1.76E-35 | -0.929522861 | 0.14  | 0.317 | 4.04E-31 | 2 |
| WNK1        | 2.46E-35 | 0.789303122  | 0.356 | 0.239 | 5.66E-31 | 2 |
| NDUFA4L2.2  | 1.30E-34 | -2.095451289 | 0.138 | 0.302 | 2.99E-30 | 2 |
| PPP2R5C.2   | 9.85E-34 | 0.600449814  | 0.508 | 0.379 | 2.26E-29 | 2 |
| STK17A.2    | 2.16E-33 | 0.577455923  | 0.489 | 0.355 | 4.97E-29 | 2 |
| HLA-F.2     | 2.48E-33 | 0.595713422  | 0.535 | 0.429 | 5.70E-29 | 2 |
| C10orf54.1  | 3.28E-33 | -0.641206102 | 0.121 | 0.296 | 7.55E-29 | 2 |
| LDHA.2      | 3.40E-33 | -1.277658082 | 0.413 | 0.594 | 7.82E-29 | 2 |
| RAC2.2      | 3.87E-33 | 0.573409892  | 0.488 | 0.362 | 8.90E-29 | 2 |
| ANXA2.2     | 5.17E-33 | -0.909444523 | 0.217 | 0.409 | 1.19E-28 | 2 |
| DDIT4       | 2.16E-32 | -0.987884164 | 0.343 | 0.534 | 4.97E-28 | 2 |
| FCGRT.2     | 2.59E-32 | -0.76334814  | 0.095 | 0.255 | 5.96E-28 | 2 |
| S100A10.1   | 3.10E-32 | -0.989433156 | 0.469 | 0.623 | 7.13E-28 | 2 |
| CD63.2      | 2.49E-31 | -0.945363789 | 0.379 | 0.533 | 5.72E-27 | 2 |
| RPL17       | 4.46E-31 | -0.737767036 | 0.465 | 0.605 | 1.02E-26 | 2 |
| PNISR.1     | 5.25E-31 | 0.562095679  | 0.586 | 0.503 | 1.21E-26 | 2 |
| MSI2        | 1.82E-30 | 0.667794125  | 0.26  | 0.151 | 4.19E-26 | 2 |
| CRYAB.2     | 2.80E-30 | -1.720365413 | 0.118 | 0.272 | 6.43E-26 | 2 |
| ASAH1.1     | 3.86E-30 | -0.656658025 | 0.097 | 0.254 | 8.87E-26 | 2 |
| APOBEC3C    | 5.54E-30 | 0.805618277  | 0.301 | 0.189 | 1.27E-25 | 2 |
| HSPB1.2     | 1.69E-29 | -1.153698334 | 0.284 | 0.448 | 3.89E-25 | 2 |
| PMAIP1.1    | 4.38E-29 | 0.691953786  | 0.313 | 0.193 | 1.01E-24 | 2 |
| BTN3A2.2    | 6.98E-29 | 0.66462631   | 0.364 | 0.254 | 1.60E-24 | 2 |
| MT-ND4L     | 1.40E-28 | -0.534064802 | 0.19  | 0.376 | 3.21E-24 | 2 |
| GPX1.2      | 1.45E-28 | -1.451932602 | 0.301 | 0.441 | 3.32E-24 | 2 |
| FTL.2       | 1.62E-28 | -1.307326105 | 0.943 | 0.936 | 3.72E-24 | 2 |
| ANXA6       | 2.16E-28 | 0.546380735  | 0.355 | 0.24  | 4.97E-24 | 2 |
| PTPN7.2     | 6.20E-28 | 0.622207496  | 0.327 | 0.212 | 1.43E-23 | 2 |
| ZBTB38      | 6.37E-28 | 0.641989169  | 0.337 | 0.228 | 1.46E-23 | 2 |
| ADIRF.2     | 1.37E-27 | -1.768097442 | 0.112 | 0.253 | 3.15E-23 | 2 |
| HAVCR2      | 1.37E-27 | 0.915300165  | 0.291 | 0.192 | 3.16E-23 | 2 |
| YWHAE.2     | 1.51E-27 | -0.726279802 | 0.155 | 0.327 | 3.46E-23 | 2 |
| TMEM2.1     | 1.53E-27 | 0.669047484  | 0.279 | 0.169 | 3.53E-23 | 2 |
| YWHAH.2     | 2.11E-27 | -0.872169594 | 0.142 | 0.296 | 4.85E-23 | 2 |
| LAPTM4A.2   | 2.22E-27 | -0.712121277 | 0.19  | 0.367 | 5.10E-23 | 2 |
| AC090498.1  | 3.24E-26 | -0.804954939 | 0.369 | 0.513 | 7.44E-22 | 2 |
| CFLAR.1     | 4.37E-26 | 0.561144657  | 0.497 | 0.415 | 1.00E-21 | 2 |

|            |          |              |       |       |             |   |
|------------|----------|--------------|-------|-------|-------------|---|
| IL7R.1     | 7.58E-26 | -1.23976131  | 0.182 | 0.314 | 1.74E-21    | 2 |
| AP3S1.1    | 8.34E-26 | 0.615755897  | 0.359 | 0.264 | 1.92E-21    | 2 |
| RTN4.2     | 8.55E-26 | -0.600923289 | 0.189 | 0.365 | 1.97E-21    | 2 |
| ITM2B.2    | 1.29E-25 | -0.655732423 | 0.753 | 0.782 | 2.97E-21    | 2 |
| PPP1R2.1   | 3.24E-25 | 0.641792146  | 0.424 | 0.335 | 7.46E-21    | 2 |
| GALM       | 8.26E-25 | 0.635270646  | 0.255 | 0.157 | 1.90E-20    | 2 |
| TYMP.2     | 8.71E-25 | -0.735158364 | 0.159 | 0.308 | 2.00E-20    | 2 |
| RAC1.2     | 1.81E-24 | -0.745890662 | 0.313 | 0.461 | 4.16E-20    | 2 |
| RHOH.1     | 7.96E-24 | 0.584109469  | 0.321 | 0.219 | 1.83E-19    | 2 |
| TBC1D10C.2 | 9.49E-24 | 0.575001663  | 0.326 | 0.224 | 2.18E-19    | 2 |
| ZFAND5.2   | 1.30E-23 | -0.591762363 | 0.165 | 0.32  | 2.98E-19    | 2 |
| NPC2.2     | 6.19E-23 | -1.103216022 | 0.256 | 0.39  | 1.42E-18    | 2 |
| LAT        | 2.53E-22 | 0.566044003  | 0.255 | 0.159 | 5.80E-18    | 2 |
| RUNX3.2    | 1.17E-21 | 0.519912515  | 0.303 | 0.201 | 2.68E-17    | 2 |
| TAGLN2.1   | 1.22E-21 | -0.538884737 | 0.205 | 0.37  | 2.81E-17    | 2 |
| PPT1.2     | 2.26E-21 | -0.512609628 | 0.121 | 0.252 | 5.20E-17    | 2 |
| ANXA1.2    | 4.89E-21 | -0.719250765 | 0.333 | 0.484 | 1.12E-16    | 2 |
| UCP2.1     | 1.86E-20 | 0.586941932  | 0.416 | 0.34  | 4.27E-16    | 2 |
| CCND3.2    | 2.26E-20 | 0.549457946  | 0.43  | 0.353 | 5.20E-16    | 2 |
| TSPYL2.2   | 5.81E-20 | 0.61184301   | 0.325 | 0.231 | 1.34E-15    | 2 |
| PSAP.2     | 8.94E-20 | -0.934850291 | 0.359 | 0.478 | 2.05E-15    | 2 |
| TRAF3IP3.2 | 1.59E-19 | 0.521140204  | 0.337 | 0.248 | 3.66E-15    | 2 |
| MIF.2      | 2.23E-19 | -1.074895481 | 0.365 | 0.518 | 5.12E-15    | 2 |
| MGST3.2    | 4.67E-19 | -0.557332285 | 0.174 | 0.319 | 1.07E-14    | 2 |
| DOCK8.1    | 6.46E-19 | 0.629705883  | 0.357 | 0.285 | 1.49E-14    | 2 |
| LYZ.2      | 1.48E-18 | -2.070342964 | 0.26  | 0.359 | 3.41E-14    | 2 |
| GPATCH8.1  | 2.12E-18 | 0.544721503  | 0.303 | 0.222 | 4.87E-14    | 2 |
| SNX3.2     | 3.82E-18 | -0.541789574 | 0.24  | 0.397 | 8.77E-14    | 2 |
| CEBPB.1    | 5.81E-18 | -0.617739819 | 0.202 | 0.34  | 1.34E-13    | 2 |
| CHST12.1   | 6.96E-18 | 0.539433815  | 0.286 | 0.202 | 1.60E-13    | 2 |
| WIPF1.2    | 1.14E-17 | 0.524384353  | 0.406 | 0.337 | 2.61E-13    | 2 |
| GPSM3.1    | 1.75E-17 | 0.503423124  | 0.444 | 0.385 | 4.03E-13    | 2 |
| CBLB.1     | 1.90E-17 | 0.574152742  | 0.262 | 0.182 | 4.37E-13    | 2 |
| PCSK7.2    | 2.04E-17 | 0.535991308  | 0.39  | 0.314 | 4.70E-13    | 2 |
| PIP4K2A.1  | 4.30E-17 | 0.606221838  | 0.291 | 0.214 | 9.88E-13    | 2 |
| PRKCH.1    | 5.66E-17 | 0.537864135  | 0.322 | 0.247 | 1.30E-12    | 2 |
| IGFBP3.2   | 5.88E-17 | -1.811449979 | 0.147 | 0.253 | 1.35E-12    | 2 |
| LIMD2.1    | 6.24E-17 | 0.517634395  | 0.38  | 0.304 | 1.43E-12    | 2 |
| LGALS3.2   | 9.63E-17 | -0.586916216 | 0.137 | 0.256 | 2.21E-12    | 2 |
| NDUFC1.2   | 2.01E-16 | -0.640887823 | 0.155 | 0.281 | 4.62E-12    | 2 |
| AIF1.2     | 7.34E-15 | -1.109996205 | 0.177 | 0.267 | 1.69E-10    | 2 |
| HLA-DRA.2  | 7.53E-15 | -0.979860709 | 0.816 | 0.66  | 1.73E-10    | 2 |
| IGFBP7.2   | 1.47E-14 | -2.396083598 | 0.279 | 0.388 | 3.37E-10    | 2 |
| GNLY.2     | 5.51E-14 | -2.273847838 | 0.17  | 0.26  | 1.27E-09    | 2 |
| ENO1.2     | 7.86E-14 | -0.877963563 | 0.485 | 0.603 | 1.81E-09    | 2 |
| TUBA1B.2   | 2.67E-13 | -0.561045899 | 0.297 | 0.425 | 6.14E-09    | 2 |
| NFKBIA.2   | 6.84E-13 | -0.541043926 | 0.437 | 0.569 | 1.57E-08    | 2 |
| SEPT6.1    | 3.93E-12 | 0.540990098  | 0.327 | 0.273 | 9.03E-08    | 2 |
| C1QA.2     | 3.10E-10 | -1.341463998 | 0.18  | 0.256 | 7.13E-06    | 2 |
| S100A6.1   | 5.83E-10 | -0.646409936 | 0.764 | 0.766 | 1.34E-05    | 2 |
| NEAT1.1    | 7.16E-10 | -0.586416387 | 0.777 | 0.751 | 1.65E-05    | 2 |
| TP1.2      | 4.46E-09 | -0.675414955 | 0.475 | 0.573 | 0.000102474 | 2 |
| FOS.2      | 7.42E-08 | -0.593387625 | 0.687 | 0.681 | 0.001704336 | 2 |
| TXN.2      | 8.71E-08 | -0.54170774  | 0.289 | 0.398 | 0.002000924 | 2 |
| SAT1.2     | 3.59E-07 | -0.779629902 | 0.604 | 0.634 | 0.008245408 | 2 |
| APOC1.2    | 8.80E-07 | -1.35676428  | 0.227 | 0.289 | 0.02021482  | 2 |
| MT2A.2     | 1.53E-06 | -1.594819752 | 0.618 | 0.663 | 0.035146415 | 2 |
| HSPA1B     | 0        | 3.010641075  | 0.57  | 0.115 | 0           | 3 |

|              |           |              |       |       |           |   |
|--------------|-----------|--------------|-------|-------|-----------|---|
| RPS4Y1       | 0         | 2.207207157  | 0.78  | 0.075 | 0         | 3 |
| HSPA1A.1     | 5.04E-285 | 2.731748998  | 0.669 | 0.204 | 1.16E-280 | 3 |
| HSPA6        | 5.11E-283 | 2.792778633  | 0.406 | 0.068 | 1.17E-278 | 3 |
| DNAJB4       | 4.53E-247 | 1.537786305  | 0.385 | 0.068 | 1.04E-242 | 3 |
| AC090498.1.1 | 3.80E-189 | 1.186071824  | 0.888 | 0.474 | 8.74E-185 | 3 |
| RPL17.1      | 1.32E-176 | 1.068135973  | 0.917 | 0.571 | 3.02E-172 | 3 |
| PSMD5-AS1    | 2.68E-170 | 0.863701513  | 0.362 | 0.083 | 6.15E-166 | 3 |
| TRBC2.2      | 1.42E-146 | 1.041154126  | 0.779 | 0.349 | 3.26E-142 | 3 |
| CTSW.2       | 5.33E-143 | 1.122089474  | 0.558 | 0.199 | 1.23E-138 | 3 |
| TRAC.3       | 1.83E-141 | 0.913795334  | 0.844 | 0.403 | 4.21E-137 | 3 |
| CD27.2       | 2.03E-141 | 0.916988511  | 0.643 | 0.241 | 4.65E-137 | 3 |
| XIST.1       | 1.30E-140 | -2.154046027 | 0.004 | 0.453 | 2.99E-136 | 3 |
| GOLGA8A      | 3.85E-140 | 0.688626252  | 0.307 | 0.068 | 8.86E-136 | 3 |
| CD3E.2       | 1.77E-139 | 0.83548767   | 0.819 | 0.368 | 4.06E-135 | 3 |
| LINC00649    | 1.79E-130 | 0.641072169  | 0.294 | 0.065 | 4.10E-126 | 3 |
| CD3G.2       | 5.07E-128 | 0.756755172  | 0.681 | 0.266 | 1.16E-123 | 3 |
| HSPH1        | 3.86E-126 | 1.464690942  | 0.408 | 0.135 | 8.87E-122 | 3 |
| NABP1        | 1.40E-125 | 0.912002054  | 0.471 | 0.168 | 3.21E-121 | 3 |
| CD2.2        | 8.96E-123 | 0.772809465  | 0.859 | 0.429 | 2.06E-118 | 3 |
| PTPRC.3      | 2.42E-121 | 0.806189265  | 0.924 | 0.595 | 5.57E-117 | 3 |
| SLFN5.1      | 2.60E-121 | 0.818927886  | 0.511 | 0.184 | 5.97E-117 | 3 |
| OXNAD1       | 5.56E-120 | 0.672074334  | 0.405 | 0.119 | 1.28E-115 | 3 |
| ITM2A.3      | 3.56E-117 | 0.853441102  | 0.668 | 0.285 | 8.19E-113 | 3 |
| CRIP1.1      | 3.00E-116 | 0.796247252  | 0.64  | 0.269 | 6.90E-112 | 3 |
| TBC1D4       | 2.90E-109 | 0.769334932  | 0.287 | 0.074 | 6.67E-105 | 3 |
| SIRPG        | 1.13E-108 | 0.623816533  | 0.292 | 0.074 | 2.60E-104 | 3 |
| GOLGA8B      | 6.67E-102 | 0.556301686  | 0.303 | 0.082 | 1.53E-97  | 3 |
| HNRNPA1L2    | 4.64E-101 | 0.722761992  | 0.398 | 0.143 | 1.07E-96  | 3 |
| SPOCK2.1     | 1.55E-98  | 0.640765674  | 0.537 | 0.213 | 3.55E-94  | 3 |
| KIAA1551.2   | 2.00E-97  | 0.717769103  | 0.649 | 0.314 | 4.60E-93  | 3 |
| TTN          | 5.47E-96  | 0.687623906  | 0.279 | 0.074 | 1.26E-91  | 3 |
| PYHIN1.2     | 2.58E-95  | 0.677877168  | 0.495 | 0.185 | 5.94E-91  | 3 |
| RPS4X.1      | 3.87E-95  | -0.68451463  | 0.97  | 0.936 | 8.88E-91  | 3 |
| HLA-DRB5.3   | 7.62E-92  | -2.661939953 | 0.064 | 0.395 | 1.75E-87  | 3 |
| CACYBP       | 1.08E-90  | 0.938047246  | 0.445 | 0.19  | 2.48E-86  | 3 |
| CD3D.3       | 1.11E-90  | 0.685262145  | 0.82  | 0.451 | 2.56E-86  | 3 |
| EOMES        | 5.61E-90  | 0.690900996  | 0.271 | 0.074 | 1.29E-85  | 3 |
| TRAF3IP3.3   | 1.29E-88  | 0.599261873  | 0.548 | 0.235 | 2.95E-84  | 3 |
| TNFRSF9.1    | 1.38E-87  | 0.675733808  | 0.299 | 0.088 | 3.18E-83  | 3 |
| GABPB1-AS1   | 3.70E-86  | 0.75899293   | 0.487 | 0.211 | 8.51E-82  | 3 |
| DENND2D      | 5.38E-86  | 0.627660655  | 0.373 | 0.129 | 1.24E-81  | 3 |
| RPS29.1      | 7.96E-86  | 0.505124713  | 0.964 | 0.918 | 1.83E-81  | 3 |
| HSPA8        | 9.29E-84  | 0.978037565  | 0.817 | 0.536 | 2.13E-79  | 3 |
| PILRB        | 6.41E-83  | 0.596125945  | 0.285 | 0.089 | 1.47E-78  | 3 |
| HSPE1.1      | 7.03E-83  | 1.239314492  | 0.621 | 0.367 | 1.61E-78  | 3 |
| FTH1.3       | 7.53E-83  | -1.447237672 | 0.988 | 0.961 | 1.73E-78  | 3 |
| LTB.2        | 3.90E-81  | 0.845249631  | 0.594 | 0.281 | 8.97E-77  | 3 |
| ITGA4.1      | 1.94E-80  | 0.713183758  | 0.478 | 0.208 | 4.46E-76  | 3 |
| MSI2.1       | 2.12E-80  | 0.644866335  | 0.38  | 0.144 | 4.88E-76  | 3 |
| IFITM1.1     | 2.71E-80  | 0.682462269  | 0.421 | 0.165 | 6.23E-76  | 3 |
| HSPD1.3      | 8.24E-80  | 1.152729394  | 0.53  | 0.277 | 1.89E-75  | 3 |
| CD82         | 1.34E-79  | 0.627249634  | 0.303 | 0.099 | 3.08E-75  | 3 |
| HSP90AA1.1   | 5.26E-79  | 1.764461987  | 0.854 | 0.64  | 1.21E-74  | 3 |
| MT-ND5.1     | 3.80E-77  | 0.655586364  | 0.891 | 0.591 | 8.74E-73  | 3 |
| DNAJB1.2     | 1.03E-76  | 1.922216672  | 0.616 | 0.406 | 2.37E-72  | 3 |
| DUSP1.1      | 6.32E-76  | -0.948674773 | 0.641 | 0.804 | 1.45E-71  | 3 |
| SKAP1.2      | 1.35E-74  | 0.54845498   | 0.43  | 0.168 | 3.10E-70  | 3 |
| TXK.1        | 1.96E-74  | 0.630197754  | 0.298 | 0.098 | 4.51E-70  | 3 |

|                |          |              |       |       |          |   |
|----------------|----------|--------------|-------|-------|----------|---|
| LCP1.3         | 3.57E-74 | 0.61702763   | 0.696 | 0.384 | 8.20E-70 | 3 |
| IKZF1.3        | 9.20E-73 | 0.537192024  | 0.5   | 0.226 | 2.11E-68 | 3 |
| CCND2          | 6.47E-71 | 0.603573151  | 0.371 | 0.145 | 1.49E-66 | 3 |
| CCL3L3         | 1.19E-70 | 0.621871407  | 0.263 | 0.084 | 2.73E-66 | 3 |
| IL32.3         | 4.20E-70 | 0.700876734  | 0.849 | 0.559 | 9.65E-66 | 3 |
| SH2D1A         | 4.59E-70 | 0.500649257  | 0.356 | 0.129 | 1.05E-65 | 3 |
| RBL2           | 9.33E-70 | 0.660829156  | 0.385 | 0.161 | 2.14E-65 | 3 |
| EMB.2          | 1.13E-69 | 0.561349129  | 0.525 | 0.251 | 2.60E-65 | 3 |
| IL2RG.3        | 1.92E-69 | 0.514996562  | 0.677 | 0.351 | 4.40E-65 | 3 |
| RNF213.2       | 2.85E-69 | 0.621855312  | 0.657 | 0.368 | 6.54E-65 | 3 |
| CD8A.1         | 3.65E-68 | 0.788913855  | 0.468 | 0.213 | 8.39E-64 | 3 |
| MDFIC          | 7.27E-68 | 0.50117849   | 0.285 | 0.099 | 1.67E-63 | 3 |
| MT-ND4L.1      | 1.86E-66 | 0.634072634  | 0.622 | 0.342 | 4.27E-62 | 3 |
| AAK1.3         | 7.11E-66 | 0.538481243  | 0.637 | 0.352 | 1.63E-61 | 3 |
| ARAP2          | 5.82E-65 | 0.511355516  | 0.348 | 0.134 | 1.34E-60 | 3 |
| LAPTM5.1       | 1.36E-64 | 0.51368318   | 0.875 | 0.546 | 3.13E-60 | 3 |
| PBXIP1.1       | 4.64E-64 | 0.558367084  | 0.41  | 0.178 | 1.07E-59 | 3 |
| PIK3IP1.3      | 5.92E-64 | 0.508867791  | 0.633 | 0.339 | 1.36E-59 | 3 |
| CD8B.1         | 1.71E-63 | 0.672323874  | 0.4   | 0.169 | 3.92E-59 | 3 |
| ITM2C.1        | 1.15E-61 | 0.554812623  | 0.356 | 0.143 | 2.63E-57 | 3 |
| TRBC1.2        | 2.19E-61 | 0.844562365  | 0.613 | 0.335 | 5.04E-57 | 3 |
| BCL2           | 2.48E-61 | 0.694115415  | 0.361 | 0.158 | 5.69E-57 | 3 |
| ZFP36.2        | 5.22E-61 | -1.284971169 | 0.535 | 0.672 | 1.20E-56 | 3 |
| CYLD           | 1.69E-60 | 0.565658087  | 0.375 | 0.164 | 3.88E-56 | 3 |
| LYST.2         | 2.38E-60 | 0.623111984  | 0.446 | 0.212 | 5.47E-56 | 3 |
| RAC2.3         | 1.48E-59 | 0.503708124  | 0.647 | 0.353 | 3.40E-55 | 3 |
| RP11-796E2.4   | 1.84E-59 | 0.559345199  | 0.339 | 0.139 | 4.23E-55 | 3 |
| UCP2.2         | 7.11E-59 | 0.515453978  | 0.603 | 0.329 | 1.63E-54 | 3 |
| NR4A1          | 1.12E-56 | 0.743297169  | 0.27  | 0.105 | 2.58E-52 | 3 |
| CHORDC1        | 3.98E-56 | 0.518160039  | 0.266 | 0.1   | 9.14E-52 | 3 |
| PHTF2          | 5.58E-56 | 0.54491944   | 0.268 | 0.1   | 1.28E-51 | 3 |
| TRIM22         | 5.10E-55 | 0.551381266  | 0.456 | 0.234 | 1.17E-50 | 3 |
| GZMK.3         | 6.28E-55 | 0.658966454  | 0.604 | 0.349 | 1.44E-50 | 3 |
| JUNB.2         | 1.44E-49 | -0.778875079 | 0.55  | 0.735 | 3.31E-45 | 3 |
| TSC22D3.2      | 1.05E-48 | -1.067481107 | 0.815 | 0.778 | 2.40E-44 | 3 |
| UGP2.2         | 1.29E-48 | 0.57446959   | 0.532 | 0.312 | 2.97E-44 | 3 |
| NKG7.3         | 1.11E-44 | 0.562065745  | 0.657 | 0.411 | 2.55E-40 | 3 |
| CMC1.3         | 2.37E-41 | 0.787070434  | 0.469 | 0.272 | 5.45E-37 | 3 |
| TMSB10.2       | 8.74E-37 | -0.512954894 | 0.98  | 0.959 | 2.01E-32 | 3 |
| DNAJA1         | 2.46E-35 | 1.091005224  | 0.479 | 0.321 | 5.65E-31 | 3 |
| FTL.3          | 8.80E-35 | -1.303838142 | 0.982 | 0.934 | 2.02E-30 | 3 |
| FOS.3          | 1.89E-30 | -0.808708516 | 0.58  | 0.689 | 4.35E-26 | 3 |
| CCL4L2.2       | 1.24E-28 | 0.53191586   | 0.337 | 0.182 | 2.84E-24 | 3 |
| SPP1.1         | 3.08E-28 | -0.774614308 | 0.378 | 0.205 | 7.08E-24 | 3 |
| KLRB1.2        | 1.07E-26 | 0.662113926  | 0.353 | 0.202 | 2.47E-22 | 3 |
| CEBPB.2        | 4.85E-24 | -1.066546607 | 0.195 | 0.338 | 1.11E-19 | 3 |
| MT1E           | 1.33E-21 | -0.795877267 | 0.303 | 0.164 | 3.06E-17 | 3 |
| IFITM3.3       | 3.53E-20 | -1.771890497 | 0.288 | 0.385 | 8.11E-16 | 3 |
| HBA2.2         | 3.93E-20 | 3.95903653   | 0.372 | 0.242 | 9.04E-16 | 3 |
| IGFBP3.3       | 8.69E-20 | -2.154885735 | 0.132 | 0.252 | 2.00E-15 | 3 |
| S100A9.3       | 1.42E-18 | -2.346941953 | 0.139 | 0.259 | 3.25E-14 | 3 |
| GNLY.3         | 2.71E-18 | -1.728717584 | 0.138 | 0.261 | 6.23E-14 | 3 |
| GSTP1.2        | 4.20E-16 | -0.953404697 | 0.452 | 0.492 | 9.65E-12 | 3 |
| IGFBP7.3       | 6.90E-16 | -2.617407331 | 0.286 | 0.385 | 1.59E-11 | 3 |
| RP11-347P5.1.3 | 1.41E-15 | -0.962680494 | 0.303 | 0.38  | 3.24E-11 | 3 |
| ANXA1.3        | 5.01E-15 | -0.626697349 | 0.378 | 0.478 | 1.15E-10 | 3 |
| APOE.2         | 6.24E-15 | -1.554956496 | 0.674 | 0.421 | 1.43E-10 | 3 |
| YBX1.2         | 2.61E-14 | -0.653717624 | 0.75  | 0.665 | 6.00E-10 | 3 |

|            |           |              |       |       |             |   |
|------------|-----------|--------------|-------|-------|-------------|---|
| HLA-DRB1.3 | 1.04E-13  | -0.601139029 | 0.841 | 0.573 | 2.40E-09    | 3 |
| RAC1.3     | 2.07E-13  | -0.934136773 | 0.431 | 0.449 | 4.75E-09    | 3 |
| MT2A.3     | 3.95E-13  | -1.897145775 | 0.697 | 0.657 | 9.07E-09    | 3 |
| ITM2B.3    | 3.40E-12  | -0.633065293 | 0.898 | 0.771 | 7.82E-08    | 3 |
| IGKC       | 1.03E-11  | -2.655202647 | 0.213 | 0.302 | 2.38E-07    | 3 |
| RGCC.2     | 1.20E-11  | -1.150093441 | 0.234 | 0.312 | 2.77E-07    | 3 |
| CD63.3     | 1.42E-11  | -0.922220884 | 0.535 | 0.519 | 3.26E-07    | 3 |
| VIM.3      | 1.83E-11  | -0.735741328 | 0.872 | 0.764 | 4.21E-07    | 3 |
| HBB        | 3.63E-11  | 3.753898616  | 0.492 | 0.385 | 8.34E-07    | 3 |
| KLF6.2     | 4.04E-11  | -0.621316678 | 0.654 | 0.649 | 9.28E-07    | 3 |
| HLA-DPB1.2 | 5.93E-11  | -0.782273455 | 0.865 | 0.616 | 1.36E-06    | 3 |
| TNFAIP3.3  | 6.30E-11  | -0.646214811 | 0.384 | 0.452 | 1.45E-06    | 3 |
| NNMT.3     | 6.89E-11  | -1.329863125 | 0.442 | 0.289 | 1.58E-06    | 3 |
| CEBPD.3    | 3.04E-10  | -0.914274911 | 0.223 | 0.283 | 6.98E-06    | 3 |
| POMP.2     | 6.12E-10  | -0.755272408 | 0.407 | 0.451 | 1.41E-05    | 3 |
| CRYAB.3    | 1.03E-09  | -1.129506844 | 0.378 | 0.251 | 2.37E-05    | 3 |
| DSTN.2     | 2.27E-09  | -1.063751676 | 0.246 | 0.312 | 5.21E-05    | 3 |
| LAPTM4A.3  | 1.01E-08  | -0.799954143 | 0.306 | 0.355 | 0.000232303 | 3 |
| RGS1.3     | 1.29E-08  | -0.724495487 | 0.812 | 0.689 | 0.000295466 | 3 |
| HLA-DPA1.3 | 3.11E-07  | -0.908182857 | 0.803 | 0.554 | 0.00715078  | 3 |
| NR4A2.1    | 6.53E-07  | -0.515687151 | 0.215 | 0.281 | 0.015015818 | 3 |
| MT1X.2     | 7.48E-07  | -2.113196141 | 0.239 | 0.286 | 0.017194521 | 3 |
| MT1X.3     | 0         | 3.821195713  | 0.797 | 0.25  | 0           | 4 |
| MT2A.4     | 0         | 3.291209383  | 0.97  | 0.639 | 0           | 4 |
| NNMT.4     | 0         | 3.078621801  | 0.814 | 0.266 | 0           | 4 |
| ANGPTL4    | 3.71E-296 | 2.955186376  | 0.574 | 0.141 | 8.52E-292   | 4 |
| B2M.3      | 2.07E-288 | -1.426731961 | 0.922 | 0.992 | 4.77E-284   | 4 |
| NDUFA4L2.4 | 2.80E-283 | 2.311173651  | 0.747 | 0.259 | 6.44E-279   | 4 |
| TMSB4X.2   | 5.28E-271 | -1.598393928 | 0.872 | 0.983 | 1.21E-266   | 4 |
| HILPDA     | 7.77E-195 | 2.743074306  | 0.43  | 0.108 | 1.79E-190   | 4 |
| CD24       | 9.64E-191 | 2.183059798  | 0.521 | 0.156 | 2.21E-186   | 4 |
| HLA-B.3    | 3.40E-180 | -1.225553014 | 0.616 | 0.933 | 7.81E-176   | 4 |
| GAPDH.3    | 9.13E-171 | 1.244087126  | 0.903 | 0.864 | 2.10E-166   | 4 |
| HLA-E.2    | 3.31E-167 | -1.497921368 | 0.243 | 0.824 | 7.60E-163   | 4 |
| HLA-C.2    | 1.84E-164 | -1.266320592 | 0.499 | 0.907 | 4.23E-160   | 4 |
| RPLP0.2    | 6.43E-163 | 1.403130941  | 0.854 | 0.842 | 1.48E-158   | 4 |
| RPL36.2    | 3.33E-161 | 1.10072077   | 0.907 | 0.913 | 7.66E-157   | 4 |
| TMSB10.3   | 4.37E-157 | 0.916647488  | 0.979 | 0.959 | 1.00E-152   | 4 |
| FTH1.4     | 3.15E-154 | 0.819712199  | 0.98  | 0.961 | 7.23E-150   | 4 |
| EGLN3      | 6.35E-149 | 2.130802094  | 0.282 | 0.057 | 1.46E-144   | 4 |
| ARHGDIB.1  | 2.88E-147 | -1.221347975 | 0.131 | 0.707 | 6.62E-143   | 4 |
| PTPRC.4    | 7.40E-145 | -1.52428557  | 0.104 | 0.649 | 1.70E-140   | 4 |
| BTG1.3     | 5.76E-138 | -1.468526497 | 0.463 | 0.867 | 1.32E-133   | 4 |
| CORO1A.3   | 2.57E-136 | -1.507490119 | 0.081 | 0.596 | 5.91E-132   | 4 |
| ZFP36L2.3  | 3.02E-131 | -1.641425383 | 0.232 | 0.728 | 6.94E-127   | 4 |
| HLA-A.2    | 2.22E-130 | -1.09318445  | 0.592 | 0.913 | 5.11E-126   | 4 |
| RPS8.2     | 3.95E-130 | 0.981026093  | 0.92  | 0.918 | 9.08E-126   | 4 |
| MYL12A.1   | 1.04E-127 | -1.113311938 | 0.174 | 0.723 | 2.40E-123   | 4 |
| ARPC2.1    | 5.26E-122 | -1.054709094 | 0.138 | 0.67  | 1.21E-117   | 4 |
| LAPTM5.2   | 7.80E-121 | -1.371831396 | 0.106 | 0.597 | 1.79E-116   | 4 |
| GMFG.1     | 1.02E-119 | -1.109142898 | 0.092 | 0.585 | 2.35E-115   | 4 |
| RPL41.1    | 6.06E-119 | 0.634231555  | 0.988 | 0.975 | 1.39E-114   | 4 |
| ENO1.3     | 1.06E-118 | 1.717677109  | 0.717 | 0.585 | 2.44E-114   | 4 |
| RPL10.1    | 1.31E-117 | 0.644411735  | 0.986 | 0.974 | 3.01E-113   | 4 |
| TMA7.2     | 5.14E-117 | -1.01651069  | 0.189 | 0.728 | 1.18E-112   | 4 |
| CD53.3     | 1.66E-113 | -1.230948284 | 0.05  | 0.498 | 3.81E-109   | 4 |
| HCST.4     | 7.55E-113 | -1.170730638 | 0.097 | 0.573 | 1.73E-108   | 4 |
| SRGN.2     | 1.12E-112 | -1.216287526 | 0.344 | 0.82  | 2.57E-108   | 4 |

|            |           |              |       |       |           |   |
|------------|-----------|--------------|-------|-------|-----------|---|
| FYB.3      | 3.28E-112 | -1.415302359 | 0.045 | 0.486 | 7.54E-108 | 4 |
| HLA-DPB1.3 | 6.00E-111 | -1.790972366 | 0.175 | 0.661 | 1.38E-106 | 4 |
| CELF2.3    | 6.39E-110 | -1.375517261 | 0.029 | 0.451 | 1.47E-105 | 4 |
| RPS5       | 2.20E-109 | 1.197791301  | 0.802 | 0.844 | 5.05E-105 | 4 |
| CFL1       | 6.39E-108 | -0.999649395 | 0.264 | 0.777 | 1.47E-103 | 4 |
| EVL.4      | 1.92E-107 | -1.167002139 | 0.074 | 0.522 | 4.41E-103 | 4 |
| CYBA.1     | 7.44E-107 | -0.999134587 | 0.209 | 0.717 | 1.71E-102 | 4 |
| CRYAB.4    | 9.10E-107 | 1.648213735  | 0.519 | 0.243 | 2.09E-102 | 4 |
| RGS1.4     | 1.38E-106 | -1.572778751 | 0.298 | 0.722 | 3.17E-102 | 4 |
| S100A4.3   | 7.79E-106 | -1.292681152 | 0.259 | 0.727 | 1.79E-101 | 4 |
| CXCR4.3    | 9.16E-105 | -1.356477061 | 0.388 | 0.8   | 2.11E-100 | 4 |
| CD44.3     | 5.70E-104 | -1.133703564 | 0.075 | 0.518 | 1.31E-99  | 4 |
| SRSF7.2    | 1.84E-103 | -1.093664616 | 0.111 | 0.572 | 4.22E-99  | 4 |
| CD74.3     | 2.30E-103 | -1.76441899  | 0.372 | 0.821 | 5.28E-99  | 4 |
| CD37.3     | 5.60E-103 | -1.099719989 | 0.06  | 0.489 | 1.29E-98  | 4 |
| STK4.3     | 8.05E-102 | -1.208591286 | 0.069 | 0.498 | 1.85E-97  | 4 |
| RPL13.1    | 5.19E-101 | 0.60193365   | 0.956 | 0.965 | 1.19E-96  | 4 |
| LDHA.4     | 5.88E-101 | 1.546799608  | 0.696 | 0.571 | 1.35E-96  | 4 |
| RBM39.1    | 2.55E-100 | -0.806262599 | 0.112 | 0.573 | 5.85E-96  | 4 |
| GPSM3.2    | 1.24E-99  | -1.235874255 | 0.023 | 0.414 | 2.84E-95  | 4 |
| LSP1.3     | 5.83E-99  | -1.14878282  | 0.049 | 0.459 | 1.34E-94  | 4 |
| HLA-DPA1.4 | 8.84E-97  | -1.768987114 | 0.156 | 0.597 | 2.03E-92  | 4 |
| RARRES2    | 1.33E-95  | 2.048938326  | 0.31  | 0.099 | 3.06E-91  | 4 |
| PNISR.3    | 1.87E-94  | -0.74002865  | 0.098 | 0.537 | 4.31E-90  | 4 |
| PRPF38B.4  | 2.66E-94  | -0.975417389 | 0.056 | 0.459 | 6.12E-90  | 4 |
| HLA-F.4    | 5.04E-94  | -0.944766419 | 0.058 | 0.462 | 1.16E-89  | 4 |
| DDX5.3     | 2.68E-92  | -0.796701037 | 0.368 | 0.839 | 6.15E-88  | 4 |
| ITGB2.2    | 4.29E-92  | -1.186607531 | 0.049 | 0.438 | 9.85E-88  | 4 |
| MGST1      | 7.06E-92  | 1.886677486  | 0.308 | 0.099 | 1.62E-87  | 4 |
| CD2.3      | 1.30E-91  | -1.445576593 | 0.081 | 0.481 | 2.99E-87  | 4 |
| ARGLU1.2   | 2.00E-91  | -0.881837771 | 0.058 | 0.457 | 4.59E-87  | 4 |
| RHOA.1     | 8.77E-91  | -0.866102093 | 0.106 | 0.534 | 2.01E-86  | 4 |
| CCL5.3     | 9.66E-91  | -1.871100701 | 0.206 | 0.584 | 2.22E-86  | 4 |
| AKAP13.4   | 1.31E-90  | -0.776862166 | 0.06  | 0.456 | 3.01E-86  | 4 |
| ELF1.3     | 1.83E-90  | -0.862776224 | 0.064 | 0.464 | 4.20E-86  | 4 |
| DDX24.2    | 1.89E-90  | -0.802729091 | 0.074 | 0.481 | 4.35E-86  | 4 |
| CALM1.1    | 4.06E-90  | -0.714435539 | 0.16  | 0.624 | 9.32E-86  | 4 |
| CYTIP.3    | 6.74E-90  | -1.064522917 | 0.091 | 0.5   | 1.55E-85  | 4 |
| JAK1.1     | 1.49E-89  | -0.885902163 | 0.042 | 0.418 | 3.43E-85  | 4 |
| SH3BGRL3.3 | 5.73E-89  | -0.772915771 | 0.228 | 0.711 | 1.32E-84  | 4 |
| LCP1.4     | 5.75E-89  | -1.030212904 | 0.047 | 0.427 | 1.32E-84  | 4 |
| ARL6IP5.2  | 2.22E-88  | -0.632729327 | 0.076 | 0.482 | 5.10E-84  | 4 |
| SLA.4      | 5.44E-88  | -1.038077806 | 0.045 | 0.422 | 1.25E-83  | 4 |
| VAMP2.3    | 1.07E-87  | -0.712502595 | 0.082 | 0.49  | 2.46E-83  | 4 |
| VIM.4      | 1.13E-87  | 1.281035684  | 0.797 | 0.769 | 2.60E-83  | 4 |
| CD52.3     | 1.19E-87  | -1.258325558 | 0.161 | 0.573 | 2.73E-83  | 4 |
| RPL18A.1   | 1.26E-87  | 0.726940146  | 0.906 | 0.931 | 2.91E-83  | 4 |
| RPS19.1    | 4.74E-87  | 0.624344507  | 0.957 | 0.951 | 1.09E-82  | 4 |
| TNFAIP3.4  | 5.87E-87  | -1.128618043 | 0.079 | 0.471 | 1.35E-82  | 4 |
| KMT2E.3    | 3.99E-86  | -0.748160067 | 0.05  | 0.427 | 9.17E-82  | 4 |
| ATP1B1     | 5.22E-86  | 2.248849533  | 0.332 | 0.125 | 1.20E-81  | 4 |
| RNF213.3   | 8.41E-85  | -0.923236333 | 0.043 | 0.409 | 1.93E-80  | 4 |
| YWHAZ.3    | 1.99E-84  | -0.673238233 | 0.106 | 0.519 | 4.57E-80  | 4 |
| CFLAR.3    | 2.46E-84  | -0.829160002 | 0.064 | 0.445 | 5.65E-80  | 4 |
| MALAT1.3   | 2.94E-84  | -0.760119386 | 0.97  | 0.983 | 6.76E-80  | 4 |
| CD69.4     | 9.11E-84  | -1.53048171  | 0.158 | 0.552 | 2.09E-79  | 4 |
| GIMAP4.1   | 9.29E-84  | -1.230987356 | 0.018 | 0.359 | 2.13E-79  | 4 |
| TRAC.4     | 1.39E-83  | -1.530238599 | 0.082 | 0.454 | 3.19E-79  | 4 |



|            |          |              |       |       |          |   |
|------------|----------|--------------|-------|-------|----------|---|
| YWHAB      | 1.70E-83 | -0.624784747 | 0.101 | 0.512 | 3.91E-79 | 4 |
| IL2RG.4    | 1.79E-83 | -1.20982194  | 0.038 | 0.394 | 4.11E-79 | 4 |
| N4BP2L2.3  | 5.94E-83 | -0.579619195 | 0.128 | 0.555 | 1.36E-78 | 4 |
| GZMA.3     | 6.27E-83 | -1.647646739 | 0.078 | 0.441 | 1.44E-78 | 4 |
| FNBP1.3    | 1.03E-82 | -0.95292507  | 0.035 | 0.389 | 2.38E-78 | 4 |
| CD3E.3     | 1.13E-82 | -1.191942847 | 0.055 | 0.419 | 2.59E-78 | 4 |
| HSP90AA1.2 | 1.18E-82 | -1.040063342 | 0.228 | 0.681 | 2.71E-78 | 4 |
| AAK1.4     | 2.93E-82 | -0.907489367 | 0.038 | 0.392 | 6.73E-78 | 4 |
| CD48.4     | 3.51E-82 | -0.964270469 | 0.041 | 0.396 | 8.06E-78 | 4 |
| ATP5E.2    | 4.53E-82 | -0.789879329 | 0.409 | 0.842 | 1.04E-77 | 4 |
| SOD2.3     | 6.69E-82 | 2.095715881  | 0.493 | 0.281 | 1.54E-77 | 4 |
| RAC2.4     | 7.39E-82 | -1.045897724 | 0.039 | 0.394 | 1.70E-77 | 4 |
| HMGB2.1    | 2.53E-81 | -0.834245111 | 0.103 | 0.5   | 5.81E-77 | 4 |
| HSPA8.1    | 6.04E-81 | -0.687725854 | 0.148 | 0.58  | 1.39E-76 | 4 |
| FXVD5.2    | 6.66E-81 | -0.683996707 | 0.101 | 0.505 | 1.53E-76 | 4 |
| WIPF1.4    | 1.64E-80 | -1.058174717 | 0.026 | 0.363 | 3.77E-76 | 4 |
| DNAJB1.3   | 1.70E-80 | -1.334799378 | 0.074 | 0.442 | 3.91E-76 | 4 |
| TPM3       | 2.56E-80 | -0.675279075 | 0.088 | 0.476 | 5.89E-76 | 4 |
| KIAA1551.3 | 2.94E-80 | -1.114367453 | 0.023 | 0.355 | 6.76E-76 | 4 |
| ARPC1B     | 5.12E-80 | -0.627904214 | 0.129 | 0.55  | 1.18E-75 | 4 |
| PSMB9.1    | 1.23E-79 | -0.651360273 | 0.106 | 0.508 | 2.82E-75 | 4 |
| DDX17.1    | 3.37E-79 | -0.744323044 | 0.058 | 0.421 | 7.74E-75 | 4 |
| CAP1       | 4.86E-79 | -0.711178543 | 0.066 | 0.434 | 1.12E-74 | 4 |
| RSRP1.3    | 1.18E-78 | -0.721947393 | 0.068 | 0.435 | 2.71E-74 | 4 |
| RPL3.1     | 1.21E-78 | 0.680061974  | 0.926 | 0.932 | 2.78E-74 | 4 |
| STK17A.4   | 1.35E-78 | -0.998288288 | 0.042 | 0.387 | 3.11E-74 | 4 |
| RPL7.2     | 2.20E-78 | 0.753030343  | 0.9   | 0.921 | 5.05E-74 | 4 |
| DUSP2.3    | 3.90E-78 | -1.426847583 | 0.089 | 0.453 | 8.96E-74 | 4 |
| ATP5L      | 6.62E-78 | -0.578401764 | 0.226 | 0.703 | 1.52E-73 | 4 |
| SON.3      | 1.05E-77 | -0.513760635 | 0.158 | 0.596 | 2.40E-73 | 4 |
| NKTR.3     | 1.88E-77 | -1.004441577 | 0.032 | 0.367 | 4.31E-73 | 4 |
| RPL21.1    | 3.70E-77 | 0.586002368  | 0.947 | 0.952 | 8.50E-73 | 4 |
| SP100.3    | 7.44E-77 | -0.732323336 | 0.062 | 0.42  | 1.71E-72 | 4 |
| GNAS.1     | 9.70E-77 | -0.954464397 | 0.032 | 0.365 | 2.23E-72 | 4 |
| RBM25.2    | 1.68E-76 | -0.882666847 | 0.042 | 0.38  | 3.86E-72 | 4 |
| HLA-DRB1.4 | 1.94E-76 | -1.659648659 | 0.218 | 0.614 | 4.46E-72 | 4 |
| SRSF2.3    | 7.39E-76 | -0.61522357  | 0.076 | 0.445 | 1.70E-71 | 4 |
| MT1E.1     | 8.39E-76 | 2.367834729  | 0.366 | 0.161 | 1.93E-71 | 4 |
| UCP2.3     | 9.55E-76 | -1.009503454 | 0.035 | 0.366 | 2.19E-71 | 4 |
| RPS2.2     | 1.05E-75 | 0.60152367   | 0.949 | 0.944 | 2.41E-71 | 4 |
| ITGB1      | 1.82E-75 | -0.888427965 | 0.107 | 0.487 | 4.19E-71 | 4 |
| PDK4.1     | 8.33E-75 | 1.998742151  | 0.401 | 0.191 | 1.91E-70 | 4 |
| CD3D.4     | 1.08E-74 | -1.119860214 | 0.126 | 0.497 | 2.49E-70 | 4 |
| CAPZB.1    | 2.75E-74 | -0.599574823 | 0.101 | 0.484 | 6.32E-70 | 4 |
| SEPT7.1    | 5.16E-74 | -0.562516889 | 0.134 | 0.537 | 1.19E-69 | 4 |
| ARPC3.1    | 8.43E-74 | -0.594106476 | 0.191 | 0.631 | 1.94E-69 | 4 |
| LRRFIP1    | 1.06E-73 | -0.626076119 | 0.074 | 0.434 | 2.44E-69 | 4 |
| PFN1.1     | 1.80E-73 | -0.686187839 | 0.323 | 0.788 | 4.13E-69 | 4 |
| HLA-DRA.4  | 2.92E-73 | -1.727436919 | 0.289 | 0.697 | 6.71E-69 | 4 |
| TERF2IP.2  | 4.07E-73 | -0.772740753 | 0.049 | 0.385 | 9.35E-69 | 4 |
| PSME1.1    | 5.90E-73 | -0.535710623 | 0.179 | 0.607 | 1.36E-68 | 4 |
| PIK3IP1.4  | 7.30E-73 | -0.945113691 | 0.047 | 0.378 | 1.68E-68 | 4 |
| RPL24      | 8.18E-73 | 0.949964086  | 0.777 | 0.857 | 1.88E-68 | 4 |
| HERPUD1.2  | 1.69E-72 | -0.938860034 | 0.134 | 0.515 | 3.89E-68 | 4 |
| NKG7.4     | 3.06E-72 | -1.837779203 | 0.112 | 0.447 | 7.04E-68 | 4 |
| LITAF.1    | 1.34E-71 | -0.876977157 | 0.054 | 0.387 | 3.09E-67 | 4 |
| PRRC2C.2   | 5.02E-71 | -0.555819368 | 0.092 | 0.455 | 1.15E-66 | 4 |
| IDS.2      | 7.60E-71 | -0.821957038 | 0.06  | 0.393 | 1.75E-66 | 4 |

|                |          |              |       |       |          |   |
|----------------|----------|--------------|-------|-------|----------|---|
| TRBC2.3        | 2.00E-70 | -1.219069297 | 0.067 | 0.397 | 4.59E-66 | 4 |
| MBNL1.2        | 2.59E-70 | -0.711744631 | 0.048 | 0.375 | 5.95E-66 | 4 |
| ISG20.3        | 2.86E-70 | -0.861519201 | 0.053 | 0.381 | 6.57E-66 | 4 |
| CTSC.2         | 4.28E-70 | -0.843233808 | 0.044 | 0.366 | 9.83E-66 | 4 |
| SMAP2          | 2.69E-69 | -0.911198227 | 0.018 | 0.316 | 6.17E-65 | 4 |
| SH3KBP1.2      | 3.31E-69 | -0.875695559 | 0.024 | 0.326 | 7.60E-65 | 4 |
| SRSF11.1       | 3.81E-69 | -0.507262417 | 0.062 | 0.396 | 8.75E-65 | 4 |
| ID2.3          | 3.89E-69 | -0.808317337 | 0.187 | 0.588 | 8.95E-65 | 4 |
| C9orf16        | 1.15E-68 | -0.700291219 | 0.048 | 0.369 | 2.65E-64 | 4 |
| GIMAP7.3       | 2.98E-68 | -1.237091896 | 0.013 | 0.302 | 6.84E-64 | 4 |
| ARPC5.1        | 3.36E-68 | -0.594127861 | 0.097 | 0.457 | 7.72E-64 | 4 |
| CST7.3         | 6.79E-68 | -1.267008944 | 0.081 | 0.409 | 1.56E-63 | 4 |
| MSN.1          | 7.12E-68 | -0.68038567  | 0.06  | 0.386 | 1.64E-63 | 4 |
| MT-ND5.2       | 8.00E-68 | -0.580693678 | 0.209 | 0.636 | 1.84E-63 | 4 |
| ATRX.2         | 2.21E-67 | -0.565259366 | 0.072 | 0.407 | 5.08E-63 | 4 |
| ACTR2          | 6.40E-67 | -0.668660348 | 0.061 | 0.387 | 1.47E-62 | 4 |
| PCSK7.4        | 6.63E-67 | -0.850622675 | 0.035 | 0.338 | 1.52E-62 | 4 |
| CCND3.3        | 8.00E-67 | -0.638633246 | 0.056 | 0.379 | 1.84E-62 | 4 |
| ACAP1.4        | 9.91E-67 | -0.890411899 | 0.043 | 0.351 | 2.28E-62 | 4 |
| SMCHD1.1       | 1.10E-66 | -0.857044841 | 0.039 | 0.346 | 2.54E-62 | 4 |
| BCLAF1.1       | 1.44E-66 | -0.726602875 | 0.044 | 0.354 | 3.30E-62 | 4 |
| LIMD2.3        | 2.41E-66 | -0.812326097 | 0.03  | 0.328 | 5.54E-62 | 4 |
| CAV1           | 3.34E-66 | 1.557584532  | 0.315 | 0.126 | 7.67E-62 | 4 |
| DOCK8.3        | 3.50E-66 | -0.851937912 | 0.02  | 0.309 | 8.04E-62 | 4 |
| RPS6           | 4.32E-66 | 0.618142485  | 0.936 | 0.944 | 9.92E-62 | 4 |
| REL.1          | 5.48E-66 | -0.880149788 | 0.037 | 0.34  | 1.26E-61 | 4 |
| EVI2B          | 1.00E-65 | -0.793450285 | 0.045 | 0.354 | 2.30E-61 | 4 |
| ROCK1          | 3.51E-65 | -0.667842796 | 0.043 | 0.349 | 8.07E-61 | 4 |
| SRRM2          | 4.31E-65 | -0.532900551 | 0.049 | 0.36  | 9.90E-61 | 4 |
| ETS1.4         | 4.38E-65 | -0.890782789 | 0.049 | 0.357 | 1.01E-60 | 4 |
| RP11-347P5.1.4 | 7.93E-65 | -0.991428921 | 0.073 | 0.395 | 1.82E-60 | 4 |
| RPS18.1        | 9.40E-65 | 0.514767692  | 0.962 | 0.959 | 2.16E-60 | 4 |
| BTG2.2         | 2.65E-64 | -0.820514335 | 0.061 | 0.376 | 6.09E-60 | 4 |
| RGS2.3         | 2.93E-64 | -1.319028101 | 0.051 | 0.353 | 6.72E-60 | 4 |
| NCL.2          | 7.30E-64 | -0.509063628 | 0.104 | 0.452 | 1.68E-59 | 4 |
| LCK.4          | 1.07E-63 | -1.055740298 | 0.023 | 0.304 | 2.46E-59 | 4 |
| PIK3R1.3       | 1.69E-63 | -0.827526008 | 0.033 | 0.326 | 3.88E-59 | 4 |
| CKLF.1         | 2.07E-63 | -0.621311011 | 0.064 | 0.382 | 4.77E-59 | 4 |
| HCLS1          | 2.59E-63 | -0.71391686  | 0.042 | 0.34  | 5.96E-59 | 4 |
| IGFBP3.4       | 6.51E-63 | 1.493033785  | 0.439 | 0.232 | 1.50E-58 | 4 |
| EMB.3          | 6.68E-63 | -0.944632648 | 0.013 | 0.286 | 1.53E-58 | 4 |
| UBC.2          | 8.40E-63 | 1.022447345  | 0.771 | 0.844 | 1.93E-58 | 4 |
| GCC2.3         | 2.02E-62 | -0.647133793 | 0.066 | 0.378 | 4.65E-58 | 4 |
| FKBP5.1        | 2.06E-62 | -0.722338459 | 0.087 | 0.415 | 4.74E-58 | 4 |
| SEPT6.3        | 3.75E-62 | -0.935302715 | 0.02  | 0.294 | 8.62E-58 | 4 |
| PPP1R2.2       | 9.05E-62 | -0.641465222 | 0.056 | 0.361 | 2.08E-57 | 4 |
| CRIP1.2        | 1.46E-61 | -1.115010772 | 0.03  | 0.31  | 3.36E-57 | 4 |
| ARID4B.3       | 1.68E-61 | -0.544159014 | 0.055 | 0.358 | 3.86E-57 | 4 |
| RBPJ.3         | 2.37E-61 | -0.859105342 | 0.047 | 0.339 | 5.45E-57 | 4 |
| GLIPR1.1       | 1.14E-60 | -0.781126666 | 0.033 | 0.316 | 2.62E-56 | 4 |
| UBB.2          | 2.59E-60 | -0.568353547 | 0.303 | 0.746 | 5.94E-56 | 4 |
| CARD16.1       | 2.68E-60 | -0.767463779 | 0.044 | 0.335 | 6.16E-56 | 4 |
| MYO1F.1        | 3.11E-60 | -0.805552751 | 0.019 | 0.288 | 7.16E-56 | 4 |
| APOBEC3G.3     | 4.67E-60 | -1.141543656 | 0.02  | 0.287 | 1.07E-55 | 4 |
| GNAI2.2        | 5.85E-60 | -0.787400759 | 0.013 | 0.276 | 1.34E-55 | 4 |
| TRBC1.3        | 6.32E-60 | -1.323198074 | 0.073 | 0.371 | 1.45E-55 | 4 |
| STK17B.1       | 9.16E-60 | -0.580820618 | 0.093 | 0.42  | 2.11E-55 | 4 |
| RPS28.1        | 1.00E-59 | 0.510847997  | 0.928 | 0.948 | 2.31E-55 | 4 |

|            |          |              |              |       |          |          |   |
|------------|----------|--------------|--------------|-------|----------|----------|---|
| CD27.3     | 1.17E-59 | -1.473383858 | 0.02         | 0.283 | 2.68E-55 | 4        |   |
| IQGAP1.2   | 1.38E-59 | -0.559815141 | 0.058        | 0.356 | 3.16E-55 | 4        |   |
| CCL4.4     | 1.95E-59 | -1.733755068 | 0.143        | 0.459 | 4.48E-55 | 4        |   |
| NR4A2.2    | 2.55E-59 | -1.034842437 | 0.024        | 0.293 | 5.87E-55 | 4        |   |
| YPEL5.4    | 2.99E-59 | -0.632119228 | 0.062        | 0.362 | 6.86E-55 | 4        |   |
| ANKRD44.2  | 3.51E-59 | -0.864839651 | 0.014        | 0.274 | 8.07E-55 | 4        |   |
| GABPB1.3   | 3.84E-59 | -0.746834868 | 0.026        | 0.297 | 8.83E-55 | 4        |   |
| ARHGEF1.4  | 5.17E-59 | -0.885660979 | 0.017        | 0.278 | 1.19E-54 | 4        |   |
| HLA-DQB1.3 | 7.21E-59 | -1.165048988 | 0.101        | 0.411 | 1.66E-54 | 4        |   |
| TMEM50A    | 9.25E-59 | -0.542455397 | 0.058        | 0.355 | 2.13E-54 | 4        |   |
| COTL1.1    | 1.07E-58 | -0.739191119 | 0.121        | 0.454 | 2.47E-54 | 4        |   |
| CD3G.3     | 5.20E-58 | -0.969820501 | 0.036        | 0.31  | 1.20E-53 | 4        |   |
| CD84.2     | 7.59E-58 | -0.955644662 | 0.006        | 0.254 | 1.74E-53 | 4        |   |
| RPS4X.2    | 1.30E-57 | 0.56081237   | 0.919        | 0.939 | 2.98E-53 | 4        |   |
| ITM2A.4    | 1.49E-57 | -1.108267295 | 0.049        | 0.327 | 3.43E-53 | 4        |   |
| TRAF3IP3.4 | 1.51E-57 | -0.949007283 | 0.016        | 0.271 | 3.47E-53 | 4        |   |
| RCSD1.2    | 1.76E-57 | -0.796501896 | 0.012        | 0.264 | 4.04E-53 | 4        |   |
| MYCBP2     | 2.19E-57 | -0.782829047 | 0.018        | 0.273 | 5.04E-53 | 4        |   |
| ABRACL.2   | 2.25E-57 | -0.712641566 | 0.032        | 0.302 | 5.16E-53 | 4        |   |
| LTB.3      | 3.34E-57 | -1.150090461 | 0.043        | 0.318 | 7.68E-53 | 4        |   |
| EPC1.3     | 9.14E-57 | -0.67207911  | 0.025        | 0.286 | 2.10E-52 | 4        |   |
| PPP2R5C.3  | 1.60E-56 | -0.600779299 | 0.094        | 0.409 | 3.67E-52 | 4        |   |
| RPL34.2    | 1.06E-55 | 0.546106248  | 0.946        | 0.953 | 2.44E-51 | 4        |   |
| RPL26      | 1.32E-55 | 0.613287985  | 0.896        | 0.938 | 3.03E-51 | 4        |   |
| H2AFY.2    | 1.78E-55 | -0.748450372 | 0.035        | 0.299 | 4.10E-51 | 4        |   |
| SYNE2.3    | 2.46E-55 | -0.67230391  | 0.064        | 0.349 | 5.66E-51 | 4        |   |
| AKNA.2     | 3.01E-55 | -0.836257146 | 0.023        | 0.276 | 6.91E-51 | 4        |   |
| CD7.2      | 5.40E-55 | -1.049607077 | 0.048        | 0.316 | 1.24E-50 | 4        |   |
| FYN.2      | 9.37E-55 | -0.91588005  | 0.026        | 0.281 | 2.15E-50 | 4        |   |
| EIF3A      | 1.35E-54 | -0.516877027 | 0.044        | 0.314 | 3.11E-50 | 4        |   |
| RGCC.3     | 1.71E-54 | -1.371309259 | 0.055        | 0.323 | 3.93E-50 | 4        |   |
| C10orf10   | 2.74E-54 | 1.645475494  | 0.265        | 0.106 | 6.29E-50 | 4        |   |
| PNN.2      | 2.81E-54 | -0.52990433  | 0.049        | 0.32  | 6.46E-50 | 4        |   |
| ICAM3.4    | 2.94E-54 | -0.739423367 | 0.031        | 0.288 | 6.75E-50 | 4        |   |
| CCNH.2     | 3.45E-54 | -0.655310608 | 0.037        | 0.3   | 7.92E-50 | 4        |   |
| IKZF1.4    | 5.03E-54 | -0.778375135 | 0.016        | 0.258 | 1.16E-49 | 4        |   |
| SAMSN1.2   | 6.32E-54 | -0.673117585 | 0.06         | 0.339 | 1.45E-49 | 4        |   |
| WNK1.1     | 6.48E-54 | -0.763206582 | 0.019        | 0.264 | 1.49E-49 | 4        |   |
| PAK2.1     | 7.01E-54 | -0.607661888 | 0.03         | 0.284 | 1.61E-49 | 4        |   |
| ACTB       | 1.04E-53 | -0.618119034 | 0.733        | 0.941 | 2.39E-49 | 4        |   |
| BIN2.3     | 1.14E-53 | -0.737767276 | 0.019        | 0.264 | 2.63E-49 | 4        |   |
| RGS10.1    | 1.23E-53 | -0.709147757 | 0.044        | 0.311 | 2.83E-49 | 4        |   |
| EVI2A.1    | 1.52E-53 | -0.58282939  | 0.036        | 0.295 | 3.50E-49 | 4        |   |
| KIF5B      | 2.06E-53 | -0.501475895 | 0.038        | 0.3   | 4.74E-49 | 4        |   |
| MACF1.2    | 2.35E-53 | -0.660471419 | 0.024        | 0.272 | 5.41E-49 | 4        |   |
| MT-CYB.2   | 3.40E-53 | -0.587603407 | 0.495        | 0.824 | 7.80E-49 | 4        |   |
| ALOX5AP.1  | 3.76E-53 | -0.890358626 | 0.067        | 0.345 | 8.64E-49 | 4        |   |
| YWHAH.3    | 4.00E-53 | -0.94326735  | 0.039        | 0.299 | 9.20E-49 | 4        |   |
| AES.1      | 7.63E-53 | -0.765227077 | 0.021        | 0.266 | 1.75E-48 | 4        |   |
| RHOG       | 8.60E-53 | -0.624723107 | 0.029        | 0.279 | 1.98E-48 | 4        |   |
| MYL6.2     | 1.07E-52 | -0.587781711 | 0.396        | 0.822 | 2.46E-48 | 4        |   |
| TRIM22.1   | 1.31E-52 | -0.668107316 | 0.02         | 0.263 | 3.01E-48 | 4        |   |
| HLA-DQA1.2 | 1.40E-52 | -1.282619332 | 0.084        | 0.36  | 3.23E-48 | 4        |   |
| RNF19A.3   | 1.45E-52 | -0.638629242 | 0.036        | 0.292 | 3.34E-48 | 4        |   |
| CLEC2D.3   | 3.56E-52 | -0.806107047 | 0.055        | 0.322 | 8.17E-48 | 4        |   |
| PRKCH.3    | 3.94E-52 | -0.757445696 | 0.024        | 0.268 | 9.05E-48 | 4        |   |
| ARL6IP1.1  | 2-Sep    | 5.88E-52     | -0.616706621 | 0.029 | 0.277    | 1.35E-47 | 4 |
|            |          | 1.40E-51     | -0.571250746 | 0.063 | 0.337    | 3.21E-47 | 4 |

|              |          |              |       |       |          |   |
|--------------|----------|--------------|-------|-------|----------|---|
| JMJD1C       | 1.88E-51 | -0.578918047 | 0.027 | 0.273 | 4.33E-47 | 4 |
| C10orf54.2   | 3.29E-51 | -0.673318322 | 0.042 | 0.297 | 7.55E-47 | 4 |
| IL10RA.2     | 5.65E-51 | -0.583414798 | 0.029 | 0.273 | 1.30E-46 | 4 |
| RPS29.2      | 8.80E-51 | -0.563931882 | 0.802 | 0.929 | 2.02E-46 | 4 |
| TGOLN2       | 1.29E-50 | -0.579915224 | 0.031 | 0.276 | 2.97E-46 | 4 |
| ARHGAP15.1   | 1.59E-50 | -0.666719742 | 0.018 | 0.252 | 3.65E-46 | 4 |
| ADGRE5.3     | 2.26E-50 | -0.615777084 | 0.054 | 0.315 | 5.20E-46 | 4 |
| IFITM2.2     | 2.42E-50 | -0.618134887 | 0.16  | 0.496 | 5.56E-46 | 4 |
| TUBA4A.3     | 3.01E-50 | -0.723639941 | 0.038 | 0.287 | 6.92E-46 | 4 |
| BTN3A2.3     | 3.85E-50 | -0.534480345 | 0.032 | 0.278 | 8.84E-46 | 4 |
| C9orf142.2   | 8.99E-50 | -0.537961801 | 0.032 | 0.275 | 2.07E-45 | 4 |
| ATP1B3.2     | 1.14E-49 | -0.601843277 | 0.037 | 0.283 | 2.63E-45 | 4 |
| ATM.2        | 1.22E-49 | -0.568893627 | 0.026 | 0.263 | 2.81E-45 | 4 |
| RPL36A.2     | 2.48E-49 | 0.898437413  | 0.73  | 0.806 | 5.69E-45 | 4 |
| BNIP3        | 6.91E-49 | 1.494317718  | 0.282 | 0.124 | 1.59E-44 | 4 |
| CMC1.4       | 1.71E-48 | -1.163747972 | 0.053 | 0.3   | 3.94E-44 | 4 |
| OSTF1.1      | 2.40E-48 | -0.565953565 | 0.025 | 0.257 | 5.51E-44 | 4 |
| SPP1.2       | 2.56E-48 | 1.108074479  | 0.379 | 0.206 | 5.88E-44 | 4 |
| GZMK.4       | 4.19E-48 | -1.468292568 | 0.121 | 0.381 | 9.62E-44 | 4 |
| CTSS.3       | 5.56E-48 | -0.770936154 | 0.099 | 0.38  | 1.28E-43 | 4 |
| BUB3.3       | 1.00E-47 | -0.53516081  | 0.042 | 0.286 | 2.31E-43 | 4 |
| FKBP1A.3     | 1.24E-47 | -0.580871449 | 0.128 | 0.431 | 2.85E-43 | 4 |
| PRDM1.2      | 2.91E-47 | -0.613077204 | 0.055 | 0.307 | 6.70E-43 | 4 |
| ODF2L.1      | 2.95E-47 | -0.726021447 | 0.037 | 0.273 | 6.78E-43 | 4 |
| CREM.2       | 3.42E-47 | -0.783896206 | 0.05  | 0.295 | 7.86E-43 | 4 |
| SYTL3.3      | 7.51E-47 | -0.633801011 | 0.048 | 0.292 | 1.73E-42 | 4 |
| PCM1         | 8.24E-47 | -0.524158351 | 0.033 | 0.267 | 1.89E-42 | 4 |
| USP15        | 9.10E-47 | -0.528603434 | 0.039 | 0.277 | 2.09E-42 | 4 |
| TXNIP.3      | 9.22E-47 | -0.739091161 | 0.467 | 0.782 | 2.12E-42 | 4 |
| ANXA6.2      | 1.07E-46 | -0.61003373  | 0.032 | 0.264 | 2.45E-42 | 4 |
| ITSN2.1      | 3.73E-46 | -0.565212294 | 0.027 | 0.253 | 8.58E-42 | 4 |
| CD247.3      | 3.81E-46 | -0.667280452 | 0.029 | 0.254 | 8.76E-42 | 4 |
| PPP1R18.3    | 4.41E-46 | -0.549691626 | 0.029 | 0.253 | 1.01E-41 | 4 |
| MIF.4        | 1.42E-45 | 1.362828512  | 0.564 | 0.502 | 3.27E-41 | 4 |
| RPL31.1      | 2.42E-45 | 0.576437013  | 0.863 | 0.91  | 5.56E-41 | 4 |
| HLA-DMA.3    | 4.45E-45 | -0.818864571 | 0.06  | 0.302 | 1.02E-40 | 4 |
| LIMS1.2      | 9.22E-45 | -0.547875518 | 0.036 | 0.262 | 2.12E-40 | 4 |
| AC090498.1.2 | 5.24E-44 | -0.533723549 | 0.199 | 0.52  | 1.20E-39 | 4 |
| DUSP4.3      | 5.00E-43 | -0.972636764 | 0.036 | 0.254 | 1.15E-38 | 4 |
| CD96.4       | 8.00E-43 | -0.566246621 | 0.039 | 0.262 | 1.84E-38 | 4 |
| CLU.1        | 3.42E-42 | 1.599165368  | 0.34  | 0.189 | 7.86E-38 | 4 |
| TP1.3        | 1.21E-41 | 1.324482511  | 0.58  | 0.564 | 2.79E-37 | 4 |
| IL7R.2       | 6.21E-41 | -1.347657419 | 0.089 | 0.317 | 1.43E-36 | 4 |
| RPL18        | 1.40E-40 | 0.670367511  | 0.772 | 0.876 | 3.21E-36 | 4 |
| C1QA.4       | 8.16E-39 | -1.450889206 | 0.055 | 0.263 | 1.88E-34 | 4 |
| RPL35A.1     | 2.45E-38 | 0.509862381  | 0.87  | 0.92  | 5.63E-34 | 4 |
| RPL38        | 6.02E-38 | 0.64426067   | 0.79  | 0.872 | 1.38E-33 | 4 |
| TYROBP.4     | 3.81E-37 | -1.008783066 | 0.162 | 0.402 | 8.75E-33 | 4 |
| SAT1.3       | 5.57E-37 | -0.705344944 | 0.329 | 0.651 | 1.28E-32 | 4 |
| EGR1         | 1.39E-36 | 1.859268653  | 0.264 | 0.134 | 3.19E-32 | 4 |
| RPL5.1       | 3.88E-36 | 0.687044735  | 0.754 | 0.859 | 8.92E-32 | 4 |
| HLA-DRB5.4   | 3.99E-36 | -0.892441678 | 0.141 | 0.388 | 9.18E-32 | 4 |
| RPL8         | 5.03E-35 | 0.58328741   | 0.791 | 0.888 | 1.16E-30 | 4 |
| NUPR1        | 4.78E-34 | 1.545303771  | 0.252 | 0.127 | 1.10E-29 | 4 |
| RPS16.1      | 6.41E-34 | 0.549106999  | 0.811 | 0.896 | 1.47E-29 | 4 |
| RPS13        | 2.46E-33 | 0.570182293  | 0.8   | 0.883 | 5.66E-29 | 4 |
| APOE.3       | 6.99E-33 | -1.269027329 | 0.195 | 0.453 | 1.61E-28 | 4 |
| RPL6         | 2.22E-32 | 0.572302367  | 0.791 | 0.888 | 5.10E-28 | 4 |

|            |           |              |       |       |             |   |
|------------|-----------|--------------|-------|-------|-------------|---|
| PLIN2.3    | 1.85E-31  | 1.478484703  | 0.428 | 0.33  | 4.25E-27    | 4 |
| RPS17      | 7.21E-31  | 0.522345117  | 0.819 | 0.903 | 1.66E-26    | 4 |
| RPL9       | 1.49E-30  | 0.535585614  | 0.817 | 0.907 | 3.42E-26    | 4 |
| ZFAS1.3    | 6.51E-30  | 1.538105543  | 0.498 | 0.483 | 1.50E-25    | 4 |
| DDIT4.2    | 2.21E-29  | 1.44369339   | 0.527 | 0.517 | 5.09E-25    | 4 |
| GPX1.4     | 4.94E-29  | -0.686241137 | 0.208 | 0.443 | 1.13E-24    | 4 |
| CYB5A.1    | 9.77E-28  | 1.203818468  | 0.34  | 0.222 | 2.25E-23    | 4 |
| SERPINA1.3 | 1.08E-27  | 1.657479455  | 0.374 | 0.272 | 2.47E-23    | 4 |
| FCER1G.4   | 1.82E-27  | -0.729325144 | 0.119 | 0.315 | 4.18E-23    | 4 |
| AIF1.4     | 5.34E-25  | -0.683471897 | 0.097 | 0.27  | 1.23E-20    | 4 |
| DUSP1.2    | 1.26E-23  | 0.554245454  | 0.758 | 0.795 | 2.89E-19    | 4 |
| S100A10.2  | 2.69E-23  | 1.007325205  | 0.574 | 0.612 | 6.18E-19    | 4 |
| CST3.3     | 2.58E-22  | -0.670095619 | 0.203 | 0.397 | 5.92E-18    | 4 |
| RPL22.2    | 2.35E-20  | 0.640991266  | 0.678 | 0.819 | 5.40E-16    | 4 |
| NACA.1     | 1.10E-18  | 0.614359594  | 0.662 | 0.812 | 2.53E-14    | 4 |
| ALDOA.3    | 1.24E-15  | 0.876709815  | 0.549 | 0.643 | 2.85E-11    | 4 |
| GNLY.4     | 7.11E-15  | -1.229411256 | 0.132 | 0.26  | 1.63E-10    | 4 |
| PGAM1.2    | 2.91E-14  | 0.5933075    | 0.181 | 0.372 | 6.69E-10    | 4 |
| RNASET2.4  | 3.10E-14  | 1.318589219  | 0.384 | 0.359 | 7.12E-10    | 4 |
| IFITM3.4   | 4.89E-14  | 0.755998457  | 0.427 | 0.375 | 1.12E-09    | 4 |
| CCT8.1     | 3.16E-13  | 0.511175232  | 0.125 | 0.27  | 7.26E-09    | 4 |
| SSBP1      | 4.42E-13  | 0.561241172  | 0.144 | 0.302 | 1.02E-08    | 4 |
| MZT2A.1    | 1.15E-11  | 0.515942065  | 0.137 | 0.279 | 2.65E-07    | 4 |
| RSL1D1     | 1.18E-11  | 0.537338299  | 0.148 | 0.298 | 2.72E-07    | 4 |
| MZT2B      | 2.23E-11  | 0.52642727   | 0.193 | 0.372 | 5.12E-07    | 4 |
| TMED2.1    | 2.62E-11  | 0.59472549   | 0.177 | 0.345 | 6.02E-07    | 4 |
| TOMM20     | 3.23E-11  | 0.563741561  | 0.162 | 0.319 | 7.42E-07    | 4 |
| ZFP36L1.2  | 6.03E-11  | 0.559914485  | 0.198 | 0.377 | 1.39E-06    | 4 |
| SNRPE.1    | 1.81E-10  | 0.627064763  | 0.165 | 0.315 | 4.15E-06    | 4 |
| PRDX6.1    | 4.46E-10  | 0.509951064  | 0.179 | 0.335 | 1.02E-05    | 4 |
| IGKC.1     | 4.71E-10  | -1.323601244 | 0.326 | 0.294 | 1.08E-05    | 4 |
| PCNP       | 6.17E-10  | 0.533025683  | 0.159 | 0.3   | 1.42E-05    | 4 |
| EIF2S3     | 6.22E-10  | 0.554009563  | 0.141 | 0.273 | 1.43E-05    | 4 |
| RHOB.4     | 8.73E-10  | 0.992835769  | 0.372 | 0.347 | 2.01E-05    | 4 |
| HSPD1.4    | 1.31E-09  | 0.532171761  | 0.162 | 0.302 | 3.01E-05    | 4 |
| FBL        | 6.63E-09  | 0.548817723  | 0.142 | 0.265 | 0.000152336 | 4 |
| HSPB1.4    | 4.14E-08  | 0.85347768   | 0.426 | 0.435 | 0.000950303 | 4 |
| RSL24D1    | 8.52E-08  | 0.648509544  | 0.209 | 0.368 | 0.001957394 | 4 |
| NPM1.1     | 2.13E-07  | 0.756131834  | 0.536 | 0.709 | 0.004905963 | 4 |
| VMP1.2     | 6.14E-07  | 0.816097237  | 0.19  | 0.328 | 0.014117673 | 4 |
| FTL.4      | 4.43E-280 | 2.716738001  | 0.976 | 0.935 | 1.02E-275   | 5 |
| FTH1.5     | 8.37E-273 | 2.078214916  | 0.988 | 0.961 | 1.92E-268   | 5 |
| LYZ.4      | 6.04E-227 | 2.740277147  | 0.749 | 0.328 | 1.39E-222   | 5 |
| S100A9.4   | 1.67E-213 | 4.123186064  | 0.627 | 0.23  | 3.84E-209   | 5 |
| TYROBP.5   | 1.41E-174 | 2.077138113  | 0.729 | 0.368 | 3.23E-170   | 5 |
| CXCL8      | 4.19E-164 | 4.858318773  | 0.349 | 0.075 | 9.63E-160   | 5 |
| AIF1.5     | 1.03E-152 | 2.427169612  | 0.577 | 0.241 | 2.37E-148   | 5 |
| S100A8     | 8.19E-143 | 4.415350094  | 0.508 | 0.194 | 1.88E-138   | 5 |
| HLA-DRA.5  | 4.54E-129 | 1.677443686  | 0.825 | 0.664 | 1.04E-124   | 5 |
| FCER1G.5   | 1.12E-123 | 2.175078499  | 0.58  | 0.287 | 2.57E-119   | 5 |
| IL32.5     | 7.29E-111 | -1.795783065 | 0.147 | 0.602 | 1.68E-106   | 5 |
| CD2.4      | 2.59E-103 | -1.977482638 | 0.053 | 0.48  | 5.95E-99    | 5 |
| RPS27.2    | 1.71E-100 | -0.767274044 | 0.89  | 0.98  | 3.93E-96    | 5 |
| CCL5.4     | 8.05E-99  | -2.21738475  | 0.178 | 0.584 | 1.85E-94    | 5 |
| SRSF7.3    | 8.96E-97  | -1.227099487 | 0.131 | 0.568 | 2.06E-92    | 5 |
| ZFP36L2.4  | 1.48E-95  | -1.399232363 | 0.285 | 0.722 | 3.40E-91    | 5 |
| SON.4      | 4.24E-94  | -0.82031629  | 0.146 | 0.594 | 9.74E-90    | 5 |
| CD69.5     | 1.52E-91  | -1.649524046 | 0.133 | 0.551 | 3.50E-87    | 5 |

|               |          |              |       |       |          |   |
|---------------|----------|--------------|-------|-------|----------|---|
| S100A11.4     | 5.03E-90 | 1.983003232  | 0.683 | 0.585 | 1.16E-85 | 5 |
| CD3D.5        | 3.33E-87 | -1.513635758 | 0.098 | 0.496 | 7.66E-83 | 5 |
| PNISR.4       | 1.07E-86 | -0.881262544 | 0.121 | 0.532 | 2.46E-82 | 5 |
| EVL.5         | 3.84E-86 | -1.020239562 | 0.11  | 0.517 | 8.82E-82 | 5 |
| TRAC.5        | 1.85E-85 | -1.706354651 | 0.07  | 0.453 | 4.25E-81 | 5 |
| CD14          | 2.45E-84 | 2.347029205  | 0.351 | 0.13  | 5.62E-80 | 5 |
| STK4.4        | 9.98E-84 | -0.967586196 | 0.098 | 0.493 | 2.29E-79 | 5 |
| CD3E.4        | 2.79E-83 | -1.484161741 | 0.052 | 0.417 | 6.41E-79 | 5 |
| MALAT1.4      | 1.08E-82 | -0.817148463 | 0.958 | 0.984 | 2.48E-78 | 5 |
| JUN.3         | 2.46E-79 | -1.255163059 | 0.296 | 0.714 | 5.66E-75 | 5 |
| FCN1          | 1.37E-78 | 1.94124442   | 0.257 | 0.073 | 3.15E-74 | 5 |
| DDX24.3       | 1.62E-77 | -0.864529836 | 0.102 | 0.477 | 3.72E-73 | 5 |
| RBM39.2       | 4.08E-76 | -0.567401783 | 0.16  | 0.568 | 9.37E-72 | 5 |
| N4BP2L2.4     | 2.08E-74 | -0.72103351  | 0.154 | 0.551 | 4.78E-70 | 5 |
| TSC22D3.3     | 2.26E-74 | -0.887369811 | 0.391 | 0.803 | 5.19E-70 | 5 |
| VAMP2.4       | 3.52E-74 | -0.684142068 | 0.107 | 0.485 | 8.09E-70 | 5 |
| RPL23A.3      | 7.01E-74 | -0.658554614 | 0.675 | 0.945 | 1.61E-69 | 5 |
| GZMA.4        | 2.06E-73 | -1.56896364  | 0.086 | 0.438 | 4.73E-69 | 5 |
| CIRBP         | 1.11E-72 | -0.614023169 | 0.187 | 0.6   | 2.55E-68 | 5 |
| XIST.3        | 5.99E-72 | -0.902115925 | 0.074 | 0.444 | 1.38E-67 | 5 |
| DUSP2.4       | 1.23E-71 | -1.504629449 | 0.099 | 0.45  | 2.83E-67 | 5 |
| RP11-1143G9.4 | 2.29E-71 | 2.659677814  | 0.308 | 0.112 | 5.27E-67 | 5 |
| ITGB1.1       | 8.47E-71 | -1.069735564 | 0.127 | 0.483 | 1.95E-66 | 5 |
| FUS.4         | 1.88E-70 | -0.727908598 | 0.123 | 0.489 | 4.32E-66 | 5 |
| RNF213.4      | 2.06E-70 | -1.142067448 | 0.07  | 0.405 | 4.72E-66 | 5 |
| CST7.4        | 2.14E-70 | -1.482301853 | 0.068 | 0.407 | 4.91E-66 | 5 |
| TRBC2.4       | 2.76E-70 | -1.596442493 | 0.066 | 0.395 | 6.33E-66 | 5 |
| ANAPC16.1     | 5.19E-70 | -0.542377331 | 0.171 | 0.56  | 1.19E-65 | 5 |
| SYNE2.4       | 2.19E-69 | -1.294447095 | 0.031 | 0.349 | 5.02E-65 | 5 |
| ETS1.5        | 2.50E-69 | -1.180972678 | 0.034 | 0.356 | 5.74E-65 | 5 |
| PTPRC.5       | 4.06E-69 | -0.751024457 | 0.232 | 0.638 | 9.33E-65 | 5 |
| ARGLU1.3      | 5.99E-69 | -0.635622902 | 0.099 | 0.452 | 1.38E-64 | 5 |
| AAK1.5        | 9.95E-69 | -0.915060322 | 0.06  | 0.388 | 2.29E-64 | 5 |
| PPDPF.2       | 1.74E-68 | -0.607885582 | 0.263 | 0.682 | 4.00E-64 | 5 |
| RARRES3.4     | 3.83E-67 | -0.899300221 | 0.088 | 0.429 | 8.81E-63 | 5 |
| MT-ND2.1      | 5.00E-67 | -0.721895243 | 0.537 | 0.885 | 1.15E-62 | 5 |
| RSRP1.4       | 2.09E-66 | -0.730551628 | 0.092 | 0.431 | 4.79E-62 | 5 |
| C12orf57.2    | 5.36E-66 | -1.117515832 | 0.066 | 0.389 | 1.23E-61 | 5 |
| ACAP1.5       | 1.16E-65 | -1.199878408 | 0.041 | 0.35  | 2.67E-61 | 5 |
| HLA-F.5       | 1.55E-65 | -0.634079607 | 0.113 | 0.457 | 3.56E-61 | 5 |
| POLR2J3.3     | 2.48E-65 | -0.852278082 | 0.088 | 0.412 | 5.69E-61 | 5 |
| KLF6.4        | 5.76E-65 | -0.811266024 | 0.271 | 0.671 | 1.32E-60 | 5 |
| KMT2E.4       | 9.60E-65 | -0.807602556 | 0.092 | 0.422 | 2.21E-60 | 5 |
| RPL13A.3      | 1.30E-62 | -0.519774216 | 0.808 | 0.972 | 2.98E-58 | 5 |
| PRRC2C.3      | 1.62E-62 | -0.555305653 | 0.115 | 0.452 | 3.73E-58 | 5 |
| RPS29.3       | 1.70E-62 | -0.680025308 | 0.761 | 0.93  | 3.90E-58 | 5 |
| STK17A.5      | 1.84E-61 | -0.863063042 | 0.069 | 0.383 | 4.23E-57 | 5 |
| ATRX.3        | 2.58E-61 | -0.7217422   | 0.086 | 0.404 | 5.93E-57 | 5 |
| CD99.3        | 3.33E-61 | -0.591539025 | 0.145 | 0.489 | 7.66E-57 | 5 |
| ACTB.1        | 5.56E-61 | 0.840135833  | 0.926 | 0.929 | 1.28E-56 | 5 |
| PIK3IP1.5     | 7.18E-61 | -0.876819359 | 0.065 | 0.375 | 1.65E-56 | 5 |
| LY6E.3        | 7.87E-61 | -0.970892666 | 0.076 | 0.382 | 1.81E-56 | 5 |
| ID2.4         | 2.10E-60 | -0.800311764 | 0.216 | 0.584 | 4.82E-56 | 5 |
| SAT1.4        | 4.59E-60 | 1.337414722  | 0.694 | 0.628 | 1.05E-55 | 5 |
| NKG7.5        | 6.66E-60 | -1.807293967 | 0.137 | 0.444 | 1.53E-55 | 5 |
| JAK1.2        | 8.49E-60 | -0.624825249 | 0.093 | 0.413 | 1.95E-55 | 5 |
| CXCR4.4       | 1.77E-59 | -0.850161467 | 0.447 | 0.794 | 4.06E-55 | 5 |
| CD74.4        | 2.09E-59 | 1.054500345  | 0.801 | 0.794 | 4.79E-55 | 5 |

|                |          |              |       |       |          |   |
|----------------|----------|--------------|-------|-------|----------|---|
| TNFAIP3.5      | 6.22E-59 | -0.875937403 | 0.135 | 0.465 | 1.43E-54 | 5 |
| CFLAR.4        | 1.07E-58 | -0.523537012 | 0.114 | 0.44  | 2.46E-54 | 5 |
| GCC2.4         | 1.71E-58 | -0.70450806  | 0.074 | 0.376 | 3.94E-54 | 5 |
| RPS26.3        | 5.38E-58 | -0.63343257  | 0.511 | 0.891 | 1.24E-53 | 5 |
| PPP2R5C.4      | 7.68E-58 | -0.67537839  | 0.092 | 0.407 | 1.77E-53 | 5 |
| CUTA.1         | 1.01E-57 | -0.550228197 | 0.115 | 0.433 | 2.33E-53 | 5 |
| NKTR.4         | 1.81E-57 | -0.822059342 | 0.066 | 0.362 | 4.16E-53 | 5 |
| TERF2IP.3      | 2.62E-57 | -0.636367611 | 0.077 | 0.381 | 6.03E-53 | 5 |
| AKAP13.5       | 4.19E-57 | -0.506035274 | 0.123 | 0.449 | 9.62E-53 | 5 |
| CD3G.4         | 5.91E-57 | -1.101233843 | 0.029 | 0.308 | 1.36E-52 | 5 |
| LCK.5          | 6.34E-57 | -1.090111838 | 0.028 | 0.302 | 1.46E-52 | 5 |
| LEPROTL1.2     | 1.23E-56 | -0.682125929 | 0.098 | 0.406 | 2.83E-52 | 5 |
| FNBP1.4        | 1.68E-56 | -0.553159444 | 0.082 | 0.384 | 3.85E-52 | 5 |
| TRBC1.4        | 2.03E-56 | -1.460214669 | 0.077 | 0.369 | 4.66E-52 | 5 |
| PRPF38B.5      | 2.11E-56 | -0.571375828 | 0.131 | 0.453 | 4.84E-52 | 5 |
| MT-CYB.3       | 2.21E-56 | -0.64979407  | 0.439 | 0.825 | 5.08E-52 | 5 |
| C1QC           | 3.05E-56 | 2.12313894   | 0.334 | 0.144 | 7.00E-52 | 5 |
| IDS.3          | 3.06E-56 | -0.844209929 | 0.09  | 0.389 | 7.03E-52 | 5 |
| BTG1.4         | 1.41E-55 | -0.817952613 | 0.56  | 0.858 | 3.25E-51 | 5 |
| ITM2A.5        | 2.60E-54 | -1.210220327 | 0.05  | 0.325 | 5.98E-50 | 5 |
| AKAP9.2        | 2.87E-54 | -0.728666611 | 0.072 | 0.357 | 6.60E-50 | 5 |
| IL2RG.5        | 8.47E-54 | -0.709793829 | 0.092 | 0.388 | 1.95E-49 | 5 |
| CLEC2D.4       | 1.69E-53 | -0.969067709 | 0.046 | 0.321 | 3.89E-49 | 5 |
| ANKRD12.2      | 1.79E-53 | -0.540327402 | 0.102 | 0.405 | 4.11E-49 | 5 |
| PEBP1.4        | 6.41E-53 | -0.679155936 | 0.105 | 0.406 | 1.47E-48 | 5 |
| SPP1.3         | 1.11E-52 | 3.444981361  | 0.382 | 0.207 | 2.55E-48 | 5 |
| ARID4B.4       | 1.31E-52 | -0.644215823 | 0.073 | 0.356 | 3.00E-48 | 5 |
| GZMK.5         | 6.38E-52 | -1.72954962  | 0.103 | 0.38  | 1.47E-47 | 5 |
| CD7.3          | 1.37E-51 | -1.28780923  | 0.053 | 0.314 | 3.14E-47 | 5 |
| GLUL.3         | 5.10E-51 | 2.069087556  | 0.456 | 0.298 | 1.17E-46 | 5 |
| GIMAP7.4       | 7.21E-51 | -1.074155141 | 0.04  | 0.298 | 1.66E-46 | 5 |
| RP11-347P5.1.5 | 1.33E-50 | -0.631960298 | 0.097 | 0.391 | 3.06E-46 | 5 |
| HLA-DRB5.5     | 1.95E-50 | 1.937857424  | 0.517 | 0.365 | 4.49E-46 | 5 |
| KIAA1551.4     | 2.83E-50 | -0.668303293 | 0.074 | 0.35  | 6.51E-46 | 5 |
| CCND3.4        | 4.56E-50 | -0.556603081 | 0.092 | 0.375 | 1.05E-45 | 5 |
| HLA-DRB1.5     | 1.27E-49 | 1.36590595   | 0.66  | 0.587 | 2.92E-45 | 5 |
| HLA-A.3        | 1.66E-49 | -0.587402697 | 0.66  | 0.907 | 3.82E-45 | 5 |
| DDX5.4         | 2.98E-49 | -0.535597022 | 0.455 | 0.831 | 6.84E-45 | 5 |
| OCIAD2.3       | 5.47E-49 | -0.840568982 | 0.027 | 0.274 | 1.26E-44 | 5 |
| RPS3.2         | 8.84E-49 | -0.515950248 | 0.69  | 0.932 | 2.03E-44 | 5 |
| LST1.1         | 1.19E-48 | 1.950491671  | 0.394 | 0.217 | 2.74E-44 | 5 |
| PCSK7.5        | 1.81E-48 | -0.754433768 | 0.072 | 0.334 | 4.16E-44 | 5 |
| FYN.3          | 2.54E-48 | -0.968035204 | 0.034 | 0.279 | 5.83E-44 | 5 |
| RPL3.2         | 6.02E-48 | -0.528270764 | 0.686 | 0.946 | 1.38E-43 | 5 |
| MPHOSPH8.1     | 1.41E-47 | -0.568825563 | 0.06  | 0.316 | 3.25E-43 | 5 |
| RNF19A.4       | 1.62E-47 | -0.982977608 | 0.045 | 0.29  | 3.72E-43 | 5 |
| GPX1.5         | 1.72E-47 | 1.482875493  | 0.556 | 0.422 | 3.96E-43 | 5 |
| SYTL3.4        | 1.92E-47 | -0.9074498   | 0.044 | 0.29  | 4.42E-43 | 5 |
| CCL4.5         | 2.78E-47 | -1.517366569 | 0.167 | 0.455 | 6.39E-43 | 5 |
| CSTA           | 3.68E-47 | 1.903421448  | 0.281 | 0.123 | 8.45E-43 | 5 |
| SF1.3          | 9.82E-47 | -0.542550867 | 0.068 | 0.324 | 2.26E-42 | 5 |
| TAF7.2         | 2.92E-46 | -0.545876493 | 0.074 | 0.334 | 6.72E-42 | 5 |
| EZR            | 4.31E-46 | -0.649217268 | 0.08  | 0.338 | 9.91E-42 | 5 |
| PPP1R2.3       | 4.88E-46 | -0.590765376 | 0.092 | 0.357 | 1.12E-41 | 5 |
| BTN3A2.4       | 8.68E-46 | -0.610463295 | 0.034 | 0.276 | 2.00E-41 | 5 |
| MT-ATP6.1      | 1.36E-45 | -0.50821135  | 0.541 | 0.877 | 3.12E-41 | 5 |
| CD27.4         | 1.93E-45 | -1.281615311 | 0.045 | 0.28  | 4.44E-41 | 5 |
| PIK3R1.4       | 2.25E-45 | -0.748024195 | 0.07  | 0.322 | 5.16E-41 | 5 |

|            |          |              |       |       |          |   |
|------------|----------|--------------|-------|-------|----------|---|
| ODF2L.2    | 3.44E-45 | -0.86847674  | 0.036 | 0.272 | 7.90E-41 | 5 |
| MBNL1.3    | 1.34E-44 | -0.526174129 | 0.106 | 0.37  | 3.08E-40 | 5 |
| TNRC6B.2   | 1.71E-44 | -0.550772224 | 0.077 | 0.331 | 3.93E-40 | 5 |
| CST3.4     | 2.67E-44 | 1.339732473  | 0.537 | 0.377 | 6.14E-40 | 5 |
| EPC1.4     | 2.83E-44 | -0.603333988 | 0.046 | 0.283 | 6.51E-40 | 5 |
| RPL31.2    | 1.03E-43 | -0.505019488 | 0.614 | 0.924 | 2.36E-39 | 5 |
| FOSB.1     | 1.07E-43 | -0.657930498 | 0.158 | 0.44  | 2.47E-39 | 5 |
| SEPT6.4    | 1.42E-43 | -0.632948728 | 0.052 | 0.29  | 3.27E-39 | 5 |
| CD96.5     | 1.50E-43 | -0.832478755 | 0.033 | 0.261 | 3.45E-39 | 5 |
| CCNH.3     | 1.60E-43 | -0.637859355 | 0.057 | 0.297 | 3.67E-39 | 5 |
| APOBEC3G.4 | 1.65E-43 | -0.788009546 | 0.048 | 0.284 | 3.79E-39 | 5 |
| AKNA.3     | 2.06E-43 | -0.855465035 | 0.044 | 0.274 | 4.73E-39 | 5 |
| CD247.4    | 2.89E-43 | -0.916871194 | 0.028 | 0.253 | 6.64E-39 | 5 |
| CMC1.5     | 4.05E-43 | -1.293343694 | 0.06  | 0.298 | 9.31E-39 | 5 |
| YWHAQ      | 2.21E-42 | -0.514704201 | 0.103 | 0.363 | 5.09E-38 | 5 |
| BUB3.4     | 3.59E-42 | -0.606488724 | 0.053 | 0.284 | 8.24E-38 | 5 |
| LIMD2.4    | 6.13E-42 | -0.559942658 | 0.08  | 0.324 | 1.41E-37 | 5 |
| NPC2.3     | 9.08E-42 | 1.752350851  | 0.492 | 0.373 | 2.09E-37 | 5 |
| SRGN.3     | 5.72E-41 | 1.286163383  | 0.748 | 0.794 | 1.31E-36 | 5 |
| C9orf142.3 | 5.81E-41 | -0.612894374 | 0.049 | 0.273 | 1.34E-36 | 5 |
| PDCD4.2    | 9.53E-41 | -0.569612338 | 0.078 | 0.317 | 2.19E-36 | 5 |
| MYCBP2.1   | 1.05E-40 | -0.609071957 | 0.049 | 0.27  | 2.41E-36 | 5 |
| PRKCH.4    | 1.33E-40 | -0.641300773 | 0.046 | 0.265 | 3.05E-36 | 5 |
| C1QB.2     | 3.46E-40 | 2.059411326  | 0.39  | 0.226 | 7.96E-36 | 5 |
| CRIP1.3    | 6.57E-40 | -0.945204887 | 0.076 | 0.306 | 1.51E-35 | 5 |
| ATM.3      | 1.00E-39 | -0.681739924 | 0.045 | 0.261 | 2.30E-35 | 5 |
| RHOC.3     | 1.14E-39 | -0.512268738 | 0.094 | 0.336 | 2.62E-35 | 5 |
| MNDA       | 1.42E-39 | 2.476312206  | 0.279 | 0.133 | 3.27E-35 | 5 |
| DOCK8.4    | 3.36E-39 | -0.555274739 | 0.074 | 0.304 | 7.73E-35 | 5 |
| GABPB1.4   | 5.22E-39 | -0.504613357 | 0.069 | 0.292 | 1.20E-34 | 5 |
| AES.2      | 8.45E-39 | -0.622616053 | 0.049 | 0.263 | 1.94E-34 | 5 |
| IGFBP7.5   | 1.21E-38 | -2.238191153 | 0.145 | 0.392 | 2.79E-34 | 5 |
| SEPT9.3    | 5.81E-38 | -0.623414523 | 0.05  | 0.261 | 1.33E-33 | 5 |
| DUSP4.4    | 7.10E-38 | -1.045894548 | 0.044 | 0.252 | 1.63E-33 | 5 |
| PRDM1.3    | 8.08E-38 | -0.518605336 | 0.076 | 0.304 | 1.86E-33 | 5 |
| DNAJB1.4   | 1.19E-37 | -0.563319991 | 0.156 | 0.435 | 2.73E-33 | 5 |
| IL7R.3     | 1.82E-37 | -1.3844543   | 0.093 | 0.315 | 4.18E-33 | 5 |
| C1QA.5     | 2.53E-37 | 1.975542337  | 0.399 | 0.242 | 5.82E-33 | 5 |
| BBX.1      | 2.99E-37 | -0.609386498 | 0.046 | 0.255 | 6.88E-33 | 5 |
| TRAF3IP3.5 | 3.06E-37 | -0.577128986 | 0.056 | 0.267 | 7.02E-33 | 5 |
| RSF1.1     | 5.89E-37 | -0.572922718 | 0.057 | 0.268 | 1.35E-32 | 5 |
| IKZF1.5    | 6.81E-37 | -0.501755258 | 0.046 | 0.255 | 1.57E-32 | 5 |
| MACF1.3    | 9.90E-37 | -0.56734686  | 0.058 | 0.269 | 2.28E-32 | 5 |
| WHSC1L1.2  | 2.27E-36 | -0.567843486 | 0.048 | 0.251 | 5.22E-32 | 5 |
| TSTD1.1    | 4.19E-36 | -0.55232705  | 0.049 | 0.257 | 9.63E-32 | 5 |
| EMB.4      | 6.27E-36 | -0.521685063 | 0.068 | 0.281 | 1.44E-31 | 5 |
| BIN2.4     | 6.49E-36 | -0.504468042 | 0.053 | 0.261 | 1.49E-31 | 5 |
| WNK1.2     | 6.96E-36 | -0.621826022 | 0.056 | 0.26  | 1.60E-31 | 5 |
| DSTN.3     | 1.09E-35 | -0.866992516 | 0.095 | 0.319 | 2.50E-31 | 5 |
| REL.2      | 1.58E-35 | -0.551164805 | 0.106 | 0.334 | 3.64E-31 | 5 |
| BIRC3.3    | 1.63E-35 | -0.823418441 | 0.07  | 0.283 | 3.75E-31 | 5 |
| ARID5B.2   | 6.64E-35 | -0.626526221 | 0.06  | 0.266 | 1.53E-30 | 5 |
| S100A6.2   | 8.23E-35 | 1.091441311  | 0.683 | 0.771 | 1.89E-30 | 5 |
| CCDC85B.1  | 1.45E-34 | -0.636330961 | 0.062 | 0.264 | 3.32E-30 | 5 |
| ANXA6.3    | 2.00E-34 | -0.581417551 | 0.06  | 0.261 | 4.59E-30 | 5 |
| HLA-DPA1.5 | 4.78E-34 | 1.347674031  | 0.611 | 0.568 | 1.10E-29 | 5 |
| LTB.4      | 1.06E-32 | -0.641056889 | 0.095 | 0.313 | 2.44E-28 | 5 |
| CD68       | 6.01E-32 | 1.797951075  | 0.322 | 0.189 | 1.38E-27 | 5 |



|            |          |              |       |       |             |   |
|------------|----------|--------------|-------|-------|-------------|---|
| HLA-DPB1.4 | 2.68E-31 | 1.105090961  | 0.638 | 0.632 | 6.15E-27    | 5 |
| CTSS.4     | 2.23E-30 | 1.56310611   | 0.458 | 0.357 | 5.11E-26    | 5 |
| RGCC.4     | 9.94E-29 | -0.828241726 | 0.114 | 0.318 | 2.29E-24    | 5 |
| NAMPT.1    | 3.02E-28 | 2.29771325   | 0.345 | 0.227 | 6.94E-24    | 5 |
| IGFBP3.5   | 7.48E-28 | -1.636105353 | 0.076 | 0.254 | 1.72E-23    | 5 |
| NDUFA4L2.5 | 2.55E-25 | -1.411092425 | 0.121 | 0.298 | 5.86E-21    | 5 |
| MS4A6A.1   | 3.53E-25 | 1.472142213  | 0.31  | 0.187 | 8.12E-21    | 5 |
| RGS1.5     | 4.68E-24 | -0.54616047  | 0.473 | 0.709 | 1.08E-19    | 5 |
| C1orf162   | 6.05E-23 | 1.589388716  | 0.316 | 0.207 | 1.39E-18    | 5 |
| HLA-DQA1.3 | 2.30E-21 | 1.383175426  | 0.436 | 0.338 | 5.29E-17    | 5 |
| GNLY.5     | 2.62E-20 | -1.692119997 | 0.11  | 0.261 | 6.02E-16    | 5 |
| CRYAB.5    | 2.87E-20 | -1.08194921  | 0.114 | 0.267 | 6.60E-16    | 5 |
| APOC1.3    | 1.72E-19 | 2.103980829  | 0.373 | 0.278 | 3.94E-15    | 5 |
| H3F3A.4    | 6.54E-19 | 1.236893935  | 0.613 | 0.746 | 1.50E-14    | 5 |
| IFITM3.5   | 1.09E-17 | -0.525424702 | 0.21  | 0.388 | 2.52E-13    | 5 |
| APOE.4     | 2.41E-16 | 1.97622848   | 0.471 | 0.436 | 5.54E-12    | 5 |
| OAZ1.3     | 5.91E-16 | 0.926010412  | 0.605 | 0.743 | 1.36E-11    | 5 |
| HLA-DQB1.4 | 6.96E-16 | 1.356826048  | 0.448 | 0.389 | 1.60E-11    | 5 |
| PSAP.5     | 1.03E-15 | 1.345065844  | 0.476 | 0.468 | 2.36E-11    | 5 |
| NNMT.5     | 1.78E-14 | -0.774018856 | 0.167 | 0.307 | 4.09E-10    | 5 |
| TIMP1.5    | 9.60E-14 | 1.636464301  | 0.362 | 0.311 | 2.21E-09    | 5 |
| CTSB.4     | 2.18E-12 | 1.569274015  | 0.341 | 0.3   | 5.00E-08    | 5 |
| SDCBP.4    | 2.29E-12 | 1.63288974   | 0.394 | 0.371 | 5.27E-08    | 5 |
| GMFG.2     | 1.48E-11 | 0.595884404  | 0.324 | 0.569 | 3.40E-07    | 5 |
| MAP1LC3B.1 | 1.74E-10 | 0.58801859   | 0.178 | 0.323 | 4.00E-06    | 5 |
| LAMTOR4    | 4.06E-10 | 0.604013983  | 0.244 | 0.428 | 9.33E-06    | 5 |
| ATP6AP2.1  | 5.36E-10 | 0.576725039  | 0.175 | 0.314 | 1.23E-05    | 5 |
| HCLS1.1    | 1.12E-09 | 0.581341461  | 0.187 | 0.33  | 2.56E-05    | 5 |
| RGS10.2    | 1.55E-09 | 0.51205978   | 0.172 | 0.302 | 3.56E-05    | 5 |
| CEBPB.3    | 1.57E-09 | 1.612706469  | 0.355 | 0.327 | 3.61E-05    | 5 |
| LGALS1.2   | 4.10E-09 | 1.049275972  | 0.503 | 0.576 | 9.42E-05    | 5 |
| C4orf3.1   | 6.79E-09 | 0.625602294  | 0.269 | 0.463 | 0.000155988 | 5 |
| LITAF.2    | 7.71E-09 | 0.608108983  | 0.22  | 0.376 | 0.000177165 | 5 |
| RAP1A.1    | 8.78E-09 | 0.533005995  | 0.211 | 0.358 | 0.000201754 | 5 |
| CYBA.2     | 1.03E-08 | 0.850299224  | 0.561 | 0.694 | 0.00023629  | 5 |
| ATP6V0E1.3 | 1.63E-08 | 0.553399143  | 0.313 | 0.53  | 0.000374334 | 5 |
| CALR.1     | 2.77E-08 | 0.738263563  | 0.271 | 0.453 | 0.000636679 | 5 |
| RGS2.4     | 4.59E-08 | 1.694941905  | 0.358 | 0.334 | 0.001054086 | 5 |
| HSD17B11   | 6.06E-08 | 0.513199716  | 0.149 | 0.258 | 0.001392703 | 5 |
| FCGR3A.2   | 7.79E-08 | 0.999015267  | 0.285 | 0.231 | 0.00179095  | 5 |
| CARD16.2   | 8.48E-08 | 0.707162322  | 0.194 | 0.324 | 0.001948496 | 5 |
| MT2A.5     | 1.64E-07 | 0.661031548  | 0.582 | 0.664 | 0.003761777 | 5 |
| PGK1.4     | 6.82E-07 | 0.643461053  | 0.281 | 0.46  | 0.015663697 | 5 |
| SERPINA1.4 | 6.94E-07 | 0.789212735  | 0.313 | 0.276 | 0.015951023 | 5 |
| NOP10.1    | 8.90E-07 | 0.657235727  | 0.215 | 0.344 | 0.020445411 | 5 |
| CTSC.3     | 1.27E-06 | 0.747292644  | 0.219 | 0.354 | 0.029228021 | 5 |
| TYMP.4     | 1.91E-06 | 1.356623547  | 0.312 | 0.295 | 0.043781797 | 5 |
| RAB5C.3    | 2.00E-06 | 0.516429668  | 0.17  | 0.274 | 0.045947091 | 5 |
| APOE.5     | 0        | 3.299321439  | 0.995 | 0.406 | 0           | 6 |
| C3         | 0        | 2.968853184  | 0.992 | 0.093 | 0           | 6 |
| HLA-DRB1.6 | 0        | 2.944818115  | 1     | 0.567 | 0           | 6 |
| CST3.5     | 0        | 2.891460258  | 1     | 0.351 | 0           | 6 |
| C1QB.3     | 0        | 2.85182091   | 0.971 | 0.193 | 0           | 6 |
| C1QC.1     | 0        | 2.838326778  | 0.951 | 0.109 | 0           | 6 |
| APOC1.4    | 0        | 2.823523212  | 0.977 | 0.244 | 0           | 6 |
| HLA-DPB1.5 | 0        | 2.777529596  | 1     | 0.611 | 0           | 6 |
| C1QA.6     | 0        | 2.76331102   | 0.983 | 0.208 | 0           | 6 |
| CD74.5     | 0        | 2.759481561  | 1     | 0.782 | 0           | 6 |

|            |   |             |       |       |   |   |
|------------|---|-------------|-------|-------|---|---|
| HLA-DRA.6  | 0 | 2.733667729 | 1     | 0.654 | 0 | 6 |
| HLA-DPA1.6 | 0 | 2.70351187  | 1     | 0.546 | 0 | 6 |
| GPX1.6     | 0 | 2.596188213 | 1     | 0.396 | 0 | 6 |
| MS4A6A.2   | 0 | 2.533869989 | 1     | 0.148 | 0 | 6 |
| HLA-DQA1.4 | 0 | 2.341688428 | 0.997 | 0.306 | 0 | 6 |
| FCGR3A.3   | 0 | 2.31417835  | 0.996 | 0.19  | 0 | 6 |
| TREM2      | 0 | 2.234456691 | 0.931 | 0.043 | 0 | 6 |
| NPC2.4     | 0 | 2.233224304 | 0.999 | 0.344 | 0 | 6 |
| KCTD12     | 0 | 2.173440024 | 0.979 | 0.088 | 0 | 6 |
| HLA-DMB.1  | 0 | 2.171521588 | 0.993 | 0.166 | 0 | 6 |
| SGK1       | 0 | 2.147359314 | 0.963 | 0.14  | 0 | 6 |
| MS4A7      | 0 | 2.145862011 | 0.988 | 0.104 | 0 | 6 |
| SLC1A3     | 0 | 2.143317543 | 0.944 | 0.057 | 0 | 6 |
| TYROBP.6   | 0 | 2.127580436 | 1     | 0.353 | 0 | 6 |
| HLA-DMA.5  | 0 | 2.095716324 | 0.997 | 0.247 | 0 | 6 |
| FCGR2A     | 0 | 2.023658105 | 0.983 | 0.092 | 0 | 6 |
| C1orf162.1 | 0 | 2.006796592 | 0.995 | 0.169 | 0 | 6 |
| PLXDC2     | 0 | 2.000616257 | 0.96  | 0.078 | 0 | 6 |
| MAFB       | 0 | 1.991998708 | 0.914 | 0.088 | 0 | 6 |
| HLA-DQB1.5 | 0 | 1.951033258 | 0.997 | 0.358 | 0 | 6 |
| GPR34      | 0 | 1.926938372 | 0.91  | 0.05  | 0 | 6 |
| CSF1R      | 0 | 1.924492347 | 0.939 | 0.063 | 0 | 6 |
| MEF2C      | 0 | 1.909545854 | 0.968 | 0.104 | 0 | 6 |
| GRN.5      | 0 | 1.904875493 | 0.992 | 0.212 | 0 | 6 |
| LILRB4     | 0 | 1.889154472 | 0.938 | 0.054 | 0 | 6 |
| OGFRL1     | 0 | 1.867150602 | 0.936 | 0.08  | 0 | 6 |
| CSF2RA     | 0 | 1.85896314  | 0.924 | 0.06  | 0 | 6 |
| CXCL16     | 0 | 1.849512336 | 0.955 | 0.094 | 0 | 6 |
| ALDH2      | 0 | 1.849202834 | 0.963 | 0.109 | 0 | 6 |
| PSAP.6     | 0 | 1.841416254 | 1     | 0.438 | 0 | 6 |
| CD302      | 0 | 1.841313092 | 0.952 | 0.079 | 0 | 6 |
| AIF1.6     | 0 | 1.832972121 | 1     | 0.217 | 0 | 6 |
| FGL2       | 0 | 1.83030473  | 0.951 | 0.105 | 0 | 6 |
| HERPUD1.3  | 0 | 1.829897419 | 0.993 | 0.464 | 0 | 6 |
| MARCKS     | 0 | 1.814916163 | 0.939 | 0.107 | 0 | 6 |
| CTSB.5     | 0 | 1.791831852 | 0.995 | 0.263 | 0 | 6 |
| FCGRT.3    | 0 | 1.790324581 | 0.993 | 0.199 | 0 | 6 |
| SLC11A1    | 0 | 1.789795948 | 0.902 | 0.087 | 0 | 6 |
| MEF2A      | 0 | 1.784220642 | 0.951 | 0.117 | 0 | 6 |
| USP53      | 0 | 1.773952233 | 0.855 | 0.064 | 0 | 6 |
| SAT1.5     | 0 | 1.767921534 | 1     | 0.61  | 0 | 6 |
| FN1        | 0 | 1.764016302 | 0.812 | 0.085 | 0 | 6 |
| CEBPD.4    | 0 | 1.761697258 | 0.999 | 0.238 | 0 | 6 |
| CD14.1     | 0 | 1.743617936 | 0.884 | 0.1   | 0 | 6 |
| VSIG4      | 0 | 1.726813342 | 0.828 | 0.06  | 0 | 6 |
| CD163      | 0 | 1.714431022 | 0.894 | 0.082 | 0 | 6 |
| IL18       | 0 | 1.710545014 | 0.908 | 0.061 | 0 | 6 |
| PLD4       | 0 | 1.690534291 | 0.84  | 0.034 | 0 | 6 |
| FCER1G.6   | 0 | 1.683286233 | 0.996 | 0.264 | 0 | 6 |
| MSR1       | 0 | 1.673881693 | 0.936 | 0.068 | 0 | 6 |
| LY86       | 0 | 1.648460326 | 0.91  | 0.068 | 0 | 6 |
| PPT1.4     | 0 | 1.647348692 | 0.979 | 0.2   | 0 | 6 |
| CPVL       | 0 | 1.635121073 | 0.899 | 0.081 | 0 | 6 |
| ALOX5AP.3  | 0 | 1.620391497 | 0.993 | 0.291 | 0 | 6 |
| FAM26F     | 0 | 1.616356839 | 0.908 | 0.091 | 0 | 6 |
| FCGR1A     | 0 | 1.615789975 | 0.839 | 0.042 | 0 | 6 |
| LIPA       | 0 | 1.597851223 | 0.928 | 0.142 | 0 | 6 |
| RPS4Y1.1   | 0 | 1.596369542 | 0.941 | 0.075 | 0 | 6 |

|            |       |             |       |       |   |   |
|------------|-------|-------------|-------|-------|---|---|
| MNDA.1     | 0     | 1.588572694 | 0.964 | 0.094 | 0 | 6 |
| CAPG.1     | 0     | 1.580823425 | 0.969 | 0.188 | 0 | 6 |
| LST1.2     | 0     | 1.532454752 | 0.996 | 0.183 | 0 | 6 |
| LPAR6      | 0     | 1.524256006 | 0.916 | 0.108 | 0 | 6 |
| SPI1       | 0     | 1.519971933 | 0.952 | 0.097 | 0 | 6 |
| RGS10.3    | 0     | 1.505761503 | 0.98  | 0.256 | 0 | 6 |
| IL13RA1    | 0     | 1.504980321 | 0.87  | 0.071 | 0 | 6 |
| MFSD1      | 0     | 1.501096003 | 0.928 | 0.102 | 0 | 6 |
| EPB41L2    | 0     | 1.498941765 | 0.778 | 0.057 | 0 | 6 |
| RNASET2.6  | 0     | 1.496458911 | 0.999 | 0.325 | 0 | 6 |
| TLR2       | 0     | 1.493744382 | 0.887 | 0.061 | 0 | 6 |
| CD68.1     | 0     | 1.462733309 | 0.965 | 0.153 | 0 | 6 |
| RNF130     | 0     | 1.462000149 | 0.955 | 0.121 | 0 | 6 |
| RNASE6     | 0     | 1.445570449 | 0.93  | 0.105 | 0 | 6 |
| LYZ.5      | 0     | 1.437748946 | 0.995 | 0.314 | 0 | 6 |
| TBXAS1     | 0     | 1.433217626 | 0.911 | 0.082 | 0 | 6 |
| LPCAT2     | 0     | 1.430159161 | 0.822 | 0.044 | 0 | 6 |
| CSF3R      | 0     | 1.426512814 | 0.851 | 0.05  | 0 | 6 |
| SORL1      | 0     | 1.413701043 | 0.926 | 0.142 | 0 | 6 |
| FKBP5.2    | 0     | 1.398942397 | 0.996 | 0.361 | 0 | 6 |
| CTSS.5     | 0     | 1.381088193 | 0.999 | 0.327 | 0 | 6 |
| ADAP2      | 0     | 1.380267629 | 0.807 | 0.044 | 0 | 6 |
| SLC8A1     | 0     | 1.373931947 | 0.823 | 0.043 | 0 | 6 |
| CTSZ       | 0     | 1.372972521 | 0.896 | 0.116 | 0 | 6 |
| TYMP.5     | 0     | 1.342227507 | 0.968 | 0.257 | 0 | 6 |
| KCNMA1     | 0     | 1.336282396 | 0.742 | 0.035 | 0 | 6 |
| SRGAP1     | 0     | 1.333487861 | 0.836 | 0.069 | 0 | 6 |
| CLEC7A     | 0     | 1.32748083  | 0.907 | 0.091 | 0 | 6 |
| SLCO2B1    | 0     | 1.315455885 | 0.794 | 0.037 | 0 | 6 |
| ARHGAP24   | 0     | 1.292680557 | 0.815 | 0.04  | 0 | 6 |
| CYBB       | 0     | 1.292661582 | 0.854 | 0.083 | 0 | 6 |
| CTSH       | 0     | 1.29225379  | 0.926 | 0.134 | 0 | 6 |
| OLR1       | 0     | 1.287421646 | 0.709 | 0.046 | 0 | 6 |
| YWHAH.4    | 0     | 1.28433949  | 0.967 | 0.244 | 0 | 6 |
| IFNGR1.3   | 0     | 1.259839819 | 0.971 | 0.219 | 0 | 6 |
| CPM        | 0     | 1.256295523 | 0.789 | 0.1   | 0 | 6 |
| DOCK4      | 0     | 1.253484766 | 0.765 | 0.033 | 0 | 6 |
| IFI30      | 0     | 1.251533907 | 0.773 | 0.074 | 0 | 6 |
| GLUL.4     | 0     | 1.223112689 | 0.988 | 0.267 | 0 | 6 |
| RAB31      | 0     | 1.222953576 | 0.874 | 0.088 | 0 | 6 |
| IGSF6      | 0     | 1.220530413 | 0.766 | 0.06  | 0 | 6 |
| SERPINF1   | 0     | 1.219624084 | 0.757 | 0.051 | 0 | 6 |
| OLFML3     | 0     | 1.20835113  | 0.614 | 0.015 | 0 | 6 |
| CD9.1      | 0     | 1.204103989 | 0.947 | 0.182 | 0 | 6 |
| CLEC4E     | 0     | 1.202079587 | 0.777 | 0.072 | 0 | 6 |
| ARL5A.1    | 0     | 1.201621326 | 0.918 | 0.195 | 0 | 6 |
| FCGR1B     | 0     | 1.189189487 | 0.677 | 0.02  | 0 | 6 |
| CD86       | 1-Mar | 1.177208833 | 0.795 | 0.061 | 0 | 6 |
|            |       | 1.176408507 | 0.805 | 0.055 | 0 | 6 |
| PABPC4     | 0     | 1.172941034 | 0.899 | 0.162 | 0 | 6 |
| C10orf54.4 | 0     | 1.172144197 | 0.956 | 0.243 | 0 | 6 |
| HCLS1.2    | 0     | 1.167394581 | 0.977 | 0.285 | 0 | 6 |
| GAPT       | 0     | 1.163240935 | 0.715 | 0.038 | 0 | 6 |
| CNPY3      | 0     | 1.161149451 | 0.936 | 0.177 | 0 | 6 |
| PKIB       | 0     | 1.152839904 | 0.714 | 0.039 | 0 | 6 |
| ALOX5      | 0     | 1.142397026 | 0.809 | 0.06  | 0 | 6 |
| ADAM28     | 0     | 1.14235901  | 0.771 | 0.061 | 0 | 6 |
| TM6SF1     | 0     | 1.13931393  | 0.757 | 0.039 | 0 | 6 |

|              |   |             |       |       |   |   |
|--------------|---|-------------|-------|-------|---|---|
| LAIR1        | 0 | 1.132746329 | 0.852 | 0.08  | 0 | 6 |
| SRGAP2       | 0 | 1.129717402 | 0.785 | 0.063 | 0 | 6 |
| FCGR2B       | 0 | 1.126198313 | 0.73  | 0.049 | 0 | 6 |
| ANKRD22      | 0 | 1.107976637 | 0.726 | 0.041 | 0 | 6 |
| DAB2         | 0 | 1.095369078 | 0.879 | 0.121 | 0 | 6 |
| RP11-552D4.1 | 0 | 1.094075946 | 0.57  | 0.006 | 0 | 6 |
| NCOA4        | 0 | 1.091474316 | 0.84  | 0.14  | 0 | 6 |
| TNFSF13B     | 0 | 1.088359064 | 0.793 | 0.094 | 0 | 6 |
| PLBD1        | 0 | 1.076466842 | 0.773 | 0.056 | 0 | 6 |
| NUDT3        | 0 | 1.075684205 | 0.843 | 0.107 | 0 | 6 |
| CLEC5A       | 0 | 1.070987659 | 0.586 | 0.025 | 0 | 6 |
| GNB4         | 0 | 1.069773766 | 0.717 | 0.06  | 0 | 6 |
| CADM1        | 0 | 1.065764434 | 0.681 | 0.044 | 0 | 6 |
| MIS18BP1     | 0 | 1.064044634 | 0.874 | 0.172 | 0 | 6 |
| ACSL1        | 0 | 1.05781412  | 0.781 | 0.079 | 0 | 6 |
| C3AR1        | 0 | 1.057202697 | 0.797 | 0.076 | 0 | 6 |
| ASAH1.3      | 0 | 1.052301251 | 0.918 | 0.202 | 0 | 6 |
| LTC4S        | 0 | 1.044954482 | 0.693 | 0.047 | 0 | 6 |
| GABARAP      | 0 | 1.044168545 | 0.888 | 0.144 | 0 | 6 |
| RASSF4       | 0 | 1.043645125 | 0.886 | 0.123 | 0 | 6 |
| ALCAM        | 0 | 1.040001362 | 0.673 | 0.047 | 0 | 6 |
| TGFBI.1      | 0 | 1.033901879 | 0.951 | 0.14  | 0 | 6 |
| AKR1B1.1     | 0 | 1.030899851 | 0.94  | 0.197 | 0 | 6 |
| RGS18        | 0 | 1.030033508 | 0.746 | 0.058 | 0 | 6 |
| PLTP         | 0 | 1.027153354 | 0.564 | 0.041 | 0 | 6 |
| RB1          | 0 | 1.017236991 | 0.794 | 0.102 | 0 | 6 |
| FCGBP        | 0 | 1.013146042 | 0.351 | 0.011 | 0 | 6 |
| SESN1        | 0 | 1.011270797 | 0.785 | 0.105 | 0 | 6 |
| PRKAG2       | 0 | 1.009492182 | 0.82  | 0.114 | 0 | 6 |
| GNAQ         | 0 | 1.008024383 | 0.777 | 0.1   | 0 | 6 |
| APBB1IP.1    | 0 | 1.004607439 | 0.872 | 0.193 | 0 | 6 |
| ELMO1        | 0 | 1.001593917 | 0.83  | 0.112 | 0 | 6 |
| PILRA        | 0 | 0.999902051 | 0.734 | 0.058 | 0 | 6 |
| ADORA3       | 0 | 0.999686    | 0.626 | 0.024 | 0 | 6 |
| HEXA         | 0 | 0.997699663 | 0.883 | 0.157 | 0 | 6 |
| ARHGAP18     | 0 | 0.997232819 | 0.876 | 0.159 | 0 | 6 |
| TNPO1        | 0 | 0.99474023  | 0.747 | 0.095 | 0 | 6 |
| PICALM       | 0 | 0.987848468 | 0.864 | 0.151 | 0 | 6 |
| PAK1         | 0 | 0.986723367 | 0.739 | 0.064 | 0 | 6 |
| SAMHD1       | 0 | 0.983679939 | 0.87  | 0.17  | 0 | 6 |
| DSE          | 0 | 0.979206951 | 0.684 | 0.048 | 0 | 6 |
| HTRA1        | 0 | 0.975857895 | 0.731 | 0.074 | 0 | 6 |
| LIMS1.4      | 0 | 0.972735154 | 0.9   | 0.212 | 0 | 6 |
| UBL3         | 0 | 0.969561796 | 0.799 | 0.13  | 0 | 6 |
| HLA-DOA      | 0 | 0.969252914 | 0.695 | 0.046 | 0 | 6 |
| CFD          | 0 | 0.966506182 | 0.737 | 0.106 | 0 | 6 |
| NUDT16       | 0 | 0.961565296 | 0.836 | 0.12  | 0 | 6 |
| FRMD4A       | 0 | 0.961062126 | 0.657 | 0.042 | 0 | 6 |
| TANC2        | 0 | 0.959119657 | 0.64  | 0.038 | 0 | 6 |
| SLC7A7       | 0 | 0.956261756 | 0.739 | 0.065 | 0 | 6 |
| LINC01094    | 0 | 0.954046018 | 0.576 | 0.021 | 0 | 6 |
| SCPEP1       | 0 | 0.94323676  | 0.775 | 0.101 | 0 | 6 |
| ATP6V0B.3    | 0 | 0.941088583 | 0.953 | 0.258 | 0 | 6 |
| DPYSL2       | 0 | 0.939171589 | 0.786 | 0.103 | 0 | 6 |
| ATP6V1B2     | 0 | 0.936614886 | 0.765 | 0.106 | 0 | 6 |
| ZFH3         | 0 | 0.936054096 | 0.684 | 0.053 | 0 | 6 |
| CCDC88A      | 0 | 0.93487238  | 0.701 | 0.072 | 0 | 6 |
| MAN2A1       | 0 | 0.933944094 | 0.709 | 0.065 | 0 | 6 |

|          |   |             |       |       |   |   |
|----------|---|-------------|-------|-------|---|---|
| AZI2     | 0 | 0.929649005 | 0.656 | 0.101 | 0 | 6 |
| FPR1     | 0 | 0.928771786 | 0.734 | 0.061 | 0 | 6 |
| PYCARD.3 | 0 | 0.921448689 | 0.911 | 0.209 | 0 | 6 |
| LHFPL2   | 0 | 0.919908269 | 0.616 | 0.023 | 0 | 6 |
| BHLHE41  | 0 | 0.918380368 | 0.634 | 0.048 | 0 | 6 |
| LYN      | 0 | 0.915307518 | 0.763 | 0.085 | 0 | 6 |
| DST      | 0 | 0.914363823 | 0.641 | 0.05  | 0 | 6 |
| KCNMB1   | 0 | 0.905273801 | 0.61  | 0.031 | 0 | 6 |
| SRGAP2C  | 0 | 0.90092938  | 0.758 | 0.101 | 0 | 6 |
| SIGLEC10 | 0 | 0.89711418  | 0.622 | 0.044 | 0 | 6 |
| FILIP1L  | 0 | 0.895701007 | 0.637 | 0.047 | 0 | 6 |
| SRGAP2B  | 0 | 0.887670279 | 0.705 | 0.085 | 0 | 6 |
| MAP3K8   | 0 | 0.886076089 | 0.795 | 0.115 | 0 | 6 |
| AXL      | 0 | 0.88118086  | 0.625 | 0.052 | 0 | 6 |
| SDCCAG8  | 0 | 0.875690347 | 0.742 | 0.097 | 0 | 6 |
| VMO1     | 0 | 0.875365445 | 0.555 | 0.028 | 0 | 6 |
| LAP3     | 0 | 0.875162065 | 0.749 | 0.123 | 0 | 6 |
| RHBDF2   | 0 | 0.868373929 | 0.731 | 0.082 | 0 | 6 |
| A2M      | 0 | 0.867689502 | 0.922 | 0.155 | 0 | 6 |
| APLP2.4  | 0 | 0.863653459 | 0.934 | 0.217 | 0 | 6 |
| SKAP2    | 0 | 0.856559784 | 0.82  | 0.141 | 0 | 6 |
| CSTA.1   | 0 | 0.85612834  | 0.812 | 0.093 | 0 | 6 |
| ZNF812P  | 0 | 0.855808705 | 0.477 | 0.014 | 0 | 6 |
| METTL7A  | 0 | 0.853543161 | 0.707 | 0.08  | 0 | 6 |
| FEZ2     | 0 | 0.850522069 | 0.791 | 0.103 | 0 | 6 |
| LGALS9   | 0 | 0.845986148 | 0.717 | 0.086 | 0 | 6 |
| SWAP70   | 0 | 0.836434895 | 0.685 | 0.074 | 0 | 6 |
| TMEM176B | 0 | 0.835016971 | 0.783 | 0.119 | 0 | 6 |
| P2RY13   | 0 | 0.833295242 | 0.56  | 0.032 | 0 | 6 |
| IRAK3    | 0 | 0.831817065 | 0.705 | 0.06  | 0 | 6 |
| GAA      | 0 | 0.831154427 | 0.67  | 0.063 | 0 | 6 |
| SLC43A2  | 0 | 0.828030187 | 0.637 | 0.054 | 0 | 6 |
| SNX10    | 0 | 0.820213241 | 0.851 | 0.161 | 0 | 6 |
| CLN8     | 0 | 0.81760275  | 0.677 | 0.078 | 0 | 6 |
| BMP2K    | 0 | 0.815659889 | 0.581 | 0.03  | 0 | 6 |
| TFEC     | 0 | 0.81131864  | 0.586 | 0.03  | 0 | 6 |
| LY96     | 0 | 0.811252203 | 0.727 | 0.087 | 0 | 6 |
| SYK      | 0 | 0.809495689 | 0.638 | 0.044 | 0 | 6 |
| BTK      | 0 | 0.806033765 | 0.614 | 0.035 | 0 | 6 |
| FMNL2    | 0 | 0.80551859  | 0.552 | 0.03  | 0 | 6 |
| FCHO2    | 0 | 0.805217528 | 0.577 | 0.042 | 0 | 6 |
| TMEM14C  | 0 | 0.79863477  | 0.884 | 0.19  | 0 | 6 |
| LAT2     | 0 | 0.796867817 | 0.676 | 0.063 | 0 | 6 |
| ST14     | 0 | 0.793924407 | 0.602 | 0.033 | 0 | 6 |
| RNF13    | 0 | 0.793892641 | 0.847 | 0.17  | 0 | 6 |
| FGD4     | 0 | 0.792675383 | 0.644 | 0.053 | 0 | 6 |
| DPYD     | 0 | 0.790225229 | 0.689 | 0.079 | 0 | 6 |
| DNASE2   | 0 | 0.785610261 | 0.767 | 0.124 | 0 | 6 |
| TOP1     | 0 | 0.785138863 | 0.815 | 0.177 | 0 | 6 |
| BASP1    | 0 | 0.774997685 | 0.601 | 0.04  | 0 | 6 |
| SAP30    | 0 | 0.774969847 | 0.678 | 0.079 | 0 | 6 |
| CEP170   | 0 | 0.774326763 | 0.646 | 0.057 | 0 | 6 |
| SOAT1    | 0 | 0.7736995   | 0.662 | 0.074 | 0 | 6 |
| SCIN     | 0 | 0.773429329 | 0.434 | 0.011 | 0 | 6 |
| FAM105A  | 0 | 0.772249358 | 0.658 | 0.082 | 0 | 6 |
| PTGS1    | 0 | 0.772181518 | 0.576 | 0.023 | 0 | 6 |
| DRAM2    | 0 | 0.77145971  | 0.806 | 0.138 | 0 | 6 |
| RIN3     | 0 | 0.769502642 | 0.713 | 0.089 | 0 | 6 |

|            |   |             |       |       |   |   |
|------------|---|-------------|-------|-------|---|---|
| CHPT1      | 0 | 0.76770384  | 0.717 | 0.106 | 0 | 6 |
| HEXB       | 0 | 0.763909835 | 0.791 | 0.15  | 0 | 6 |
| SFMBT2     | 0 | 0.763470564 | 0.625 | 0.065 | 0 | 6 |
| SYNGR2     | 0 | 0.75973782  | 0.773 | 0.133 | 0 | 6 |
| MS4A4A     | 0 | 0.755773472 | 0.578 | 0.062 | 0 | 6 |
| CD300A     | 0 | 0.754896697 | 0.686 | 0.075 | 0 | 6 |
| STX6       | 0 | 0.752249357 | 0.626 | 0.058 | 0 | 6 |
| STX7       | 0 | 0.744682815 | 0.705 | 0.1   | 0 | 6 |
| AP1S2.1    | 0 | 0.739893666 | 0.867 | 0.189 | 0 | 6 |
| GRINA      | 0 | 0.737526921 | 0.79  | 0.124 | 0 | 6 |
| THEMIS2    | 0 | 0.734775381 | 0.715 | 0.085 | 0 | 6 |
| AP1B1      | 0 | 0.731279953 | 0.609 | 0.061 | 0 | 6 |
| FRMD4B     | 0 | 0.727923772 | 0.737 | 0.107 | 0 | 6 |
| CAMK1D     | 0 | 0.727547805 | 0.626 | 0.066 | 0 | 6 |
| TKT.1      | 0 | 0.724667714 | 0.854 | 0.193 | 0 | 6 |
| PADI2      | 0 | 0.72048682  | 0.46  | 0.011 | 0 | 6 |
| CRTAP      | 0 | 0.715512647 | 0.718 | 0.11  | 0 | 6 |
| LRP1       | 0 | 0.714049629 | 0.548 | 0.041 | 0 | 6 |
| ARRB2      | 0 | 0.712387903 | 0.816 | 0.161 | 0 | 6 |
| PEA15      | 0 | 0.707377022 | 0.656 | 0.08  | 0 | 6 |
| RAB32      | 0 | 0.706875739 | 0.621 | 0.063 | 0 | 6 |
| HCK        | 0 | 0.70352417  | 0.624 | 0.053 | 0 | 6 |
| CTTNBP2NL  | 0 | 0.703505765 | 0.624 | 0.064 | 0 | 6 |
| PAPOLG     | 0 | 0.700421341 | 0.565 | 0.042 | 0 | 6 |
| LRRK2      | 0 | 0.699537386 | 0.544 | 0.044 | 0 | 6 |
| DAGLB      | 0 | 0.697427666 | 0.537 | 0.032 | 0 | 6 |
| SCIMP      | 0 | 0.697230359 | 0.545 | 0.034 | 0 | 6 |
| NUP214     | 0 | 0.695408738 | 0.652 | 0.083 | 0 | 6 |
| GSN.1      | 0 | 0.694394171 | 0.96  | 0.183 | 0 | 6 |
| SPINT2     | 0 | 0.684295115 | 0.783 | 0.114 | 0 | 6 |
| SKIL       | 0 | 0.680123425 | 0.789 | 0.153 | 0 | 6 |
| HIF1A      | 0 | 0.676503773 | 0.747 | 0.151 | 0 | 6 |
| PARVG      | 0 | 0.676157146 | 0.749 | 0.133 | 0 | 6 |
| TLR5       | 0 | 0.674628114 | 0.46  | 0.019 | 0 | 6 |
| CD81       | 0 | 0.674405677 | 0.741 | 0.129 | 0 | 6 |
| C5AR1      | 0 | 0.673499669 | 0.516 | 0.06  | 0 | 6 |
| DENND3     | 0 | 0.666517477 | 0.577 | 0.069 | 0 | 6 |
| CREG1      | 0 | 0.665635139 | 0.68  | 0.101 | 0 | 6 |
| SLC40A1    | 0 | 0.663089836 | 0.488 | 0.055 | 0 | 6 |
| APPL1      | 0 | 0.662614865 | 0.689 | 0.112 | 0 | 6 |
| CD4        | 0 | 0.660425429 | 0.699 | 0.106 | 0 | 6 |
| ABHD12     | 0 | 0.659454719 | 0.61  | 0.074 | 0 | 6 |
| CYFIP1     | 0 | 0.65412042  | 0.525 | 0.049 | 0 | 6 |
| SSH2       | 0 | 0.65385985  | 0.733 | 0.126 | 0 | 6 |
| CTNND1     | 0 | 0.652639376 | 0.585 | 0.059 | 0 | 6 |
| SHTN1      | 0 | 0.651443796 | 0.511 | 0.036 | 0 | 6 |
| LRRC25     | 0 | 0.65035642  | 0.552 | 0.041 | 0 | 6 |
| SERPINA1.5 | 0 | 0.649170653 | 0.976 | 0.239 | 0 | 6 |
| CHN2       | 0 | 0.648731206 | 0.496 | 0.038 | 0 | 6 |
| PSTPIP2    | 0 | 0.647613381 | 0.521 | 0.052 | 0 | 6 |
| CNDP2      | 0 | 0.646067712 | 0.85  | 0.177 | 0 | 6 |
| PLSCR1     | 0 | 0.643717769 | 0.765 | 0.127 | 0 | 6 |
| ALOX15B    | 0 | 0.641614231 | 0.4   | 0.022 | 0 | 6 |
| QKI        | 0 | 0.640828387 | 0.628 | 0.088 | 0 | 6 |
| ATP6AP1    | 0 | 0.633487595 | 0.737 | 0.134 | 0 | 6 |
| UNC93B1    | 0 | 0.632812726 | 0.535 | 0.05  | 0 | 6 |
| TPP1       | 0 | 0.631714364 | 0.766 | 0.151 | 0 | 6 |
| CAT        | 0 | 0.630483597 | 0.751 | 0.133 | 0 | 6 |

|              |   |             |       |       |   |   |
|--------------|---|-------------|-------|-------|---|---|
| RHOBTB3      | 0 | 0.630058441 | 0.489 | 0.033 | 0 | 6 |
| HAVCR2.2     | 0 | 0.625095981 | 0.86  | 0.163 | 0 | 6 |
| NAIP         | 0 | 0.62349551  | 0.507 | 0.041 | 0 | 6 |
| INTS10       | 0 | 0.623414466 | 0.632 | 0.103 | 0 | 6 |
| SPTLC2       | 0 | 0.623180485 | 0.613 | 0.08  | 0 | 6 |
| GPR155       | 0 | 0.622910305 | 0.553 | 0.074 | 0 | 6 |
| COMT         | 0 | 0.617852503 | 0.767 | 0.153 | 0 | 6 |
| NAGK         | 0 | 0.616076074 | 0.69  | 0.109 | 0 | 6 |
| TGFB1        | 0 | 0.610678873 | 0.459 | 0.032 | 0 | 6 |
| PTEN         | 0 | 0.610433654 | 0.688 | 0.12  | 0 | 6 |
| FGR          | 0 | 0.610340121 | 0.645 | 0.085 | 0 | 6 |
| CLEC12A      | 0 | 0.607418002 | 0.516 | 0.061 | 0 | 6 |
| CD33         | 0 | 0.606421097 | 0.505 | 0.034 | 0 | 6 |
| KLHL5        | 0 | 0.606009184 | 0.557 | 0.062 | 0 | 6 |
| ETS2         | 0 | 0.605446949 | 0.658 | 0.088 | 0 | 6 |
| IFNGR2       | 0 | 0.605313275 | 0.644 | 0.093 | 0 | 6 |
| PLEKHO1      | 0 | 0.602851749 | 0.601 | 0.084 | 0 | 6 |
| BEX4         | 0 | 0.602576383 | 0.641 | 0.091 | 0 | 6 |
| ZYX          | 0 | 0.600146204 | 0.681 | 0.126 | 0 | 6 |
| DAPK1        | 0 | 0.598089056 | 0.5   | 0.042 | 0 | 6 |
| PRKAG2-AS1   | 0 | 0.595392226 | 0.501 | 0.044 | 0 | 6 |
| SCAMP2       | 0 | 0.591865038 | 0.761 | 0.153 | 0 | 6 |
| HSPA6.1      | 0 | 0.586736296 | 0.505 | 0.066 | 0 | 6 |
| ACSL4        | 0 | 0.581686252 | 0.523 | 0.057 | 0 | 6 |
| RP11-108M9.4 | 0 | 0.581136699 | 0.529 | 0.045 | 0 | 6 |
| SVBP         | 0 | 0.579142204 | 0.6   | 0.086 | 0 | 6 |
| IER3         | 0 | 0.578168454 | 0.544 | 0.084 | 0 | 6 |
| C1orf54      | 0 | 0.578137175 | 0.547 | 0.061 | 0 | 6 |
| RBM47        | 0 | 0.577142517 | 0.528 | 0.054 | 0 | 6 |
| ITPR2        | 0 | 0.574130602 | 0.566 | 0.077 | 0 | 6 |
| ENTPD1       | 0 | 0.57311187  | 0.709 | 0.122 | 0 | 6 |
| SLC31A2      | 0 | 0.572650453 | 0.585 | 0.079 | 0 | 6 |
| RTN1         | 0 | 0.570811918 | 0.404 | 0.015 | 0 | 6 |
| ST3GAL6      | 0 | 0.569827854 | 0.463 | 0.021 | 0 | 6 |
| STK38L       | 0 | 0.569589003 | 0.5   | 0.049 | 0 | 6 |
| EPB41L3      | 0 | 0.569561265 | 0.48  | 0.038 | 0 | 6 |
| BCAT1        | 0 | 0.568835112 | 0.445 | 0.038 | 0 | 6 |
| HMOX1        | 0 | 0.568002109 | 0.63  | 0.085 | 0 | 6 |
| CTSL         | 0 | 0.564334418 | 0.701 | 0.127 | 0 | 6 |
| ITPR1L2      | 0 | 0.563047682 | 0.447 | 0.031 | 0 | 6 |
| C20orf27     | 0 | 0.562392286 | 0.572 | 0.074 | 0 | 6 |
| RNASE2       | 0 | 0.562318342 | 0.342 | 0.011 | 0 | 6 |
| FAM96A       | 0 | 0.557303709 | 0.731 | 0.135 | 0 | 6 |
| TAX1BP3      | 0 | 0.552482725 | 0.658 | 0.114 | 0 | 6 |
| LILRB1       | 0 | 0.551659812 | 0.479 | 0.038 | 0 | 6 |
| AP001055.6   | 0 | 0.548429606 | 0.463 | 0.04  | 0 | 6 |
| SNCA         | 0 | 0.546323933 | 0.431 | 0.023 | 0 | 6 |
| POU2F2       | 0 | 0.543260459 | 0.499 | 0.064 | 0 | 6 |
| KLF7         | 0 | 0.541839841 | 0.537 | 0.066 | 0 | 6 |
| NLRP3        | 0 | 0.541756827 | 0.461 | 0.053 | 0 | 6 |
| PLXNC1       | 0 | 0.541411042 | 0.469 | 0.032 | 0 | 6 |
| NDRG2        | 0 | 0.541268742 | 0.509 | 0.052 | 0 | 6 |
| MMP2         | 0 | 0.541121613 | 0.395 | 0.014 | 0 | 6 |
| PTAFR        | 0 | 0.540630686 | 0.445 | 0.027 | 0 | 6 |
| RNF144B      | 0 | 0.540168784 | 0.495 | 0.058 | 0 | 6 |
| ADPGK        | 0 | 0.536747176 | 0.713 | 0.13  | 0 | 6 |
| FAM110B      | 0 | 0.536502004 | 0.383 | 0.01  | 0 | 6 |
| MITF         | 0 | 0.535220135 | 0.452 | 0.031 | 0 | 6 |

|           |           |             |       |       |           |   |
|-----------|-----------|-------------|-------|-------|-----------|---|
| KIAA1033  | 0         | 0.534770215 | 0.621 | 0.104 | 0         | 6 |
| PALD1     | 0         | 0.533994228 | 0.398 | 0.016 | 0         | 6 |
| TNFSF12   | 0         | 0.533104928 | 0.52  | 0.055 | 0         | 6 |
| MERTK     | 0         | 0.533071435 | 0.358 | 0.022 | 0         | 6 |
| ZSWIM7    | 0         | 0.53262996  | 0.628 | 0.098 | 0         | 6 |
| BRI3      | 0         | 0.531458839 | 0.703 | 0.131 | 0         | 6 |
| FGD2      | 0         | 0.530847343 | 0.479 | 0.039 | 0         | 6 |
| IRS2      | 0         | 0.523517547 | 0.556 | 0.081 | 0         | 6 |
| JAK2      | 0         | 0.523393954 | 0.43  | 0.038 | 0         | 6 |
| VAMP3     | 0         | 0.520747858 | 0.653 | 0.102 | 0         | 6 |
| ZNF385A   | 0         | 0.51901672  | 0.439 | 0.031 | 0         | 6 |
| EMILIN2   | 0         | 0.518178282 | 0.423 | 0.031 | 0         | 6 |
| MANBA     | 0         | 0.518094051 | 0.487 | 0.049 | 0         | 6 |
| PRCP      | 0         | 0.516700992 | 0.629 | 0.094 | 0         | 6 |
| C10orf11  | 0         | 0.51475048  | 0.505 | 0.045 | 0         | 6 |
| HNMT      | 0         | 0.514245419 | 0.628 | 0.087 | 0         | 6 |
| ITGAM     | 0         | 0.513231601 | 0.415 | 0.031 | 0         | 6 |
| SPECC1    | 0         | 0.511558922 | 0.426 | 0.032 | 0         | 6 |
| PKP2      | 0         | 0.511546044 | 0.396 | 0.033 | 0         | 6 |
| GALNT2    | 0         | 0.51081624  | 0.489 | 0.056 | 0         | 6 |
| LPL       | 0         | 0.510211639 | 0.279 | 0.021 | 0         | 6 |
| NAGA      | 0         | 0.507629412 | 0.505 | 0.052 | 0         | 6 |
| UBE2E2    | 0         | 0.507428888 | 0.493 | 0.047 | 0         | 6 |
| TIMP2     | 0         | 0.50587962  | 0.501 | 0.057 | 0         | 6 |
| LACTB     | 0         | 0.505836899 | 0.524 | 0.071 | 0         | 6 |
| TCF4      | 0         | 0.501187634 | 0.681 | 0.087 | 0         | 6 |
| GPRIN3.1  | 3.92E-307 | 0.542935478 | 0.613 | 0.103 | 9.01E-303 | 6 |
| POLD4     | 5.94E-307 | 0.506694604 | 0.585 | 0.095 | 1.37E-302 | 6 |
| ZNF106    | 3.15E-306 | 0.567822532 | 0.669 | 0.124 | 7.24E-302 | 6 |
| CD84.3    | 2.96E-304 | 0.721894806 | 0.887 | 0.203 | 6.80E-300 | 6 |
| ZEB2.3    | 8.70E-304 | 0.720897121 | 0.879 | 0.204 | 2.00E-299 | 6 |
| BAZ2B     | 8.96E-303 | 0.563580477 | 0.689 | 0.13  | 2.06E-298 | 6 |
| PTPN18    | 7.91E-301 | 0.537609578 | 0.612 | 0.107 | 1.82E-296 | 6 |
| ERCC1     | 1.43E-300 | 0.507135687 | 0.636 | 0.115 | 3.28E-296 | 6 |
| CMTM6     | 1.10E-296 | 0.630463594 | 0.84  | 0.19  | 2.54E-292 | 6 |
| FOXO3     | 1.89E-293 | 0.50322621  | 0.637 | 0.116 | 4.34E-289 | 6 |
| LAPTM5.4  | 2.38E-292 | 1.290551343 | 1     | 0.543 | 5.46E-288 | 6 |
| GLIPR1.3  | 3.37E-292 | 0.897708069 | 0.955 | 0.262 | 7.75E-288 | 6 |
| SMAP2.2   | 1.05E-290 | 0.939396236 | 0.948 | 0.261 | 2.42E-286 | 6 |
| NCF1      | 1.33E-288 | 0.731692195 | 0.725 | 0.15  | 3.06E-284 | 6 |
| AOAH.1    | 7.92E-288 | 0.503843183 | 0.644 | 0.117 | 1.82E-283 | 6 |
| AZIN1     | 1.34E-287 | 0.514929917 | 0.613 | 0.111 | 3.08E-283 | 6 |
| RNF149.3  | 2.44E-287 | 0.733413831 | 0.904 | 0.233 | 5.61E-283 | 6 |
| GNAI2.3   | 1.12E-286 | 0.792843499 | 0.886 | 0.224 | 2.57E-282 | 6 |
| RAC1.4    | 6.92E-284 | 1.091790279 | 0.997 | 0.417 | 1.59E-279 | 6 |
| PKD4.2    | 1.77E-283 | 0.5369224   | 0.773 | 0.171 | 4.07E-279 | 6 |
| MAP3K2    | 4.14E-282 | 0.501127452 | 0.654 | 0.125 | 9.50E-278 | 6 |
| ZBTB16    | 6.63E-280 | 0.594737651 | 0.814 | 0.187 | 1.52E-275 | 6 |
| MAT2A     | 2.93E-278 | 0.668310793 | 0.656 | 0.133 | 6.73E-274 | 6 |
| DCK       | 2.01E-276 | 0.535135451 | 0.795 | 0.174 | 4.63E-272 | 6 |
| PGLS      | 2.04E-276 | 0.577300823 | 0.85  | 0.204 | 4.69E-272 | 6 |
| RHOG.2    | 1.70E-270 | 0.735045187 | 0.882 | 0.229 | 3.91E-266 | 6 |
| TSPO.3    | 2.60E-270 | 1.114881124 | 0.989 | 0.388 | 5.97E-266 | 6 |
| REL.3     | 4.52E-270 | 0.9860819   | 0.945 | 0.286 | 1.04E-265 | 6 |
| NCKAP1L.1 | 4.16E-267 | 0.506968404 | 0.695 | 0.142 | 9.56E-263 | 6 |
| GRB2.1    | 1.96E-262 | 0.636388047 | 0.827 | 0.204 | 4.51E-258 | 6 |
| H2AFY.4   | 1.41E-260 | 0.730205878 | 0.908 | 0.248 | 3.23E-256 | 6 |
| TMEM219.3 | 4.22E-258 | 0.559065242 | 0.898 | 0.235 | 9.70E-254 | 6 |



|              |           |             |       |       |           |   |
|--------------|-----------|-------------|-------|-------|-----------|---|
| SPP1.4       | 5.15E-257 | 1.012622669 | 0.759 | 0.185 | 1.18E-252 | 6 |
| COTL1.2      | 3.79E-254 | 1.138907719 | 0.992 | 0.402 | 8.70E-250 | 6 |
| FTL.5        | 1.03E-251 | 0.992097157 | 1     | 0.933 | 2.37E-247 | 6 |
| S100A11.5    | 4.57E-247 | 1.150755851 | 0.999 | 0.567 | 1.05E-242 | 6 |
| FAM49B.2     | 1.84E-241 | 0.810613026 | 0.949 | 0.305 | 4.23E-237 | 6 |
| HN1.1        | 2.75E-241 | 0.630689458 | 0.805 | 0.207 | 6.33E-237 | 6 |
| HSD17B11.1   | 1.22E-240 | 0.604159796 | 0.826 | 0.219 | 2.79E-236 | 6 |
| TAOK3.1      | 1.67E-240 | 0.627711451 | 0.866 | 0.231 | 3.83E-236 | 6 |
| OSBPL8       | 5.68E-240 | 0.522876143 | 0.765 | 0.183 | 1.30E-235 | 6 |
| SEC11A.1     | 6.22E-239 | 0.77866582  | 0.941 | 0.305 | 1.43E-234 | 6 |
| MTPN.1       | 5.59E-235 | 0.503347381 | 0.778 | 0.192 | 1.28E-230 | 6 |
| ITM2B.5      | 5.94E-233 | 1.045226553 | 1     | 0.767 | 1.36E-228 | 6 |
| ATP1B3.4     | 1.36E-228 | 0.686370111 | 0.846 | 0.236 | 3.13E-224 | 6 |
| DHRS7.1      | 2.97E-220 | 0.579807872 | 0.858 | 0.242 | 6.82E-216 | 6 |
| MT-ND4L.2    | 2.06E-217 | 0.800226175 | 0.955 | 0.327 | 4.73E-213 | 6 |
| SH3BGRL.3    | 5.18E-214 | 0.773671826 | 0.973 | 0.357 | 1.19E-209 | 6 |
| PRMT2.4      | 2.40E-212 | 0.590348674 | 0.878 | 0.256 | 5.51E-208 | 6 |
| SDCBP.5      | 5.27E-211 | 0.722072928 | 0.951 | 0.34  | 1.21E-206 | 6 |
| WASF2.1      | 2.65E-210 | 0.66652938  | 0.922 | 0.296 | 6.08E-206 | 6 |
| AP2S1.5      | 8.40E-210 | 0.523902762 | 0.908 | 0.276 | 1.93E-205 | 6 |
| RCSD1.4      | 6.31E-205 | 0.541441354 | 0.805 | 0.218 | 1.45E-200 | 6 |
| CANX.4       | 3.93E-203 | 0.510480116 | 0.88  | 0.267 | 9.03E-199 | 6 |
| CTSD.2       | 1.64E-200 | 0.947632602 | 0.969 | 0.407 | 3.77E-196 | 6 |
| ATP6AP2.2    | 4.13E-200 | 0.532783183 | 0.895 | 0.273 | 9.50E-196 | 6 |
| ITGB2.4      | 3.60E-197 | 0.871404516 | 0.972 | 0.383 | 8.28E-193 | 6 |
| RHOA.3       | 1.97E-192 | 0.856530957 | 0.996 | 0.48  | 4.52E-188 | 6 |
| GNPMB        | 3.01E-189 | 0.531419615 | 0.403 | 0.073 | 6.91E-185 | 6 |
| MT-ND1.2     | 2.45E-187 | 0.892137726 | 0.999 | 0.775 | 5.63E-183 | 6 |
| CYBA.3       | 5.28E-185 | 0.905417865 | 1     | 0.669 | 1.21E-180 | 6 |
| GPX4.4       | 1.57E-184 | 0.651317057 | 0.988 | 0.423 | 3.61E-180 | 6 |
| ANXA5.4      | 2.56E-184 | 0.514226191 | 0.943 | 0.318 | 5.89E-180 | 6 |
| MT-ND3.4     | 4.37E-184 | 0.850575244 | 0.999 | 0.821 | 1.00E-179 | 6 |
| ROCK1.1      | 3.09E-182 | 0.629677795 | 0.898 | 0.299 | 7.11E-178 | 6 |
| CLU.2        | 7.95E-181 | -0.62825208 | 0.694 | 0.17  | 1.83E-176 | 6 |
| RGS2.5       | 5.52E-172 | 0.734164696 | 0.875 | 0.305 | 1.27E-167 | 6 |
| MT-ND5.4     | 1.08E-170 | 0.971759277 | 0.997 | 0.588 | 2.49E-166 | 6 |
| CELF2.5      | 1.31E-164 | 0.715508011 | 0.98  | 0.394 | 3.02E-160 | 6 |
| MTDH.2       | 2.62E-162 | 0.621121837 | 0.938 | 0.356 | 6.02E-158 | 6 |
| ACTR2.2      | 1.49E-159 | 0.576130329 | 0.922 | 0.336 | 3.43E-155 | 6 |
| EVI2B.2      | 6.78E-159 | 0.532527996 | 0.887 | 0.304 | 1.56E-154 | 6 |
| TUBA1B.4     | 1.20E-156 | 0.832010614 | 0.903 | 0.386 | 2.76E-152 | 6 |
| PDZK1IP1     | 8.04E-153 | -0.56074417 | 0.469 | 0.103 | 1.85E-148 | 6 |
| SLC25A5.2    | 6.87E-147 | 0.528485655 | 0.93  | 0.355 | 1.58E-142 | 6 |
| VAMP8.3      | 3.12E-145 | 0.606386949 | 0.979 | 0.431 | 7.17E-141 | 6 |
| HSPA1A.2     | 1.01E-143 | 0.539054079 | 0.68  | 0.209 | 2.32E-139 | 6 |
| SLA.5        | 4.21E-143 | 0.503687177 | 0.961 | 0.367 | 9.68E-139 | 6 |
| TPT1.4       | 8.81E-143 | 0.621511039 | 1     | 0.919 | 2.03E-138 | 6 |
| FYB.4        | 2.47E-142 | 0.696954195 | 0.975 | 0.431 | 5.67E-138 | 6 |
| RPS27.3      | 1.02E-138 | -0.86492891 | 1     | 0.974 | 2.35E-134 | 6 |
| ARPC1B.1     | 1.51E-138 | 0.666201359 | 0.991 | 0.498 | 3.46E-134 | 6 |
| DDX17.3      | 3.95E-138 | 0.527823447 | 0.93  | 0.369 | 9.07E-134 | 6 |
| NEAT1.4      | 6.15E-137 | 0.706924274 | 0.997 | 0.739 | 1.41E-132 | 6 |
| SERP1        | 6.26E-137 | 0.531648169 | 0.971 | 0.406 | 1.44E-132 | 6 |
| CD63.5       | 2.75E-134 | 0.535950097 | 0.995 | 0.493 | 6.32E-130 | 6 |
| RPS4X.4      | 1.68E-133 | -0.86700222 | 1     | 0.935 | 3.86E-129 | 6 |
| RGS1.6       | 2.19E-133 | 0.809389216 | 0.997 | 0.68  | 5.04E-129 | 6 |
| AC090498.1.3 | 3.98E-129 | 0.544610276 | 0.991 | 0.473 | 9.16E-125 | 6 |
| FXVD5.3      | 4.36E-126 | 0.584194261 | 0.971 | 0.453 | 1.00E-121 | 6 |

|          |           |              |       |       |           |   |
|----------|-----------|--------------|-------|-------|-----------|---|
| XIST.4   | 3.05E-115 | -2.197328449 | 0.005 | 0.448 | 7.00E-111 | 6 |
| ARPC3.3  | 2.81E-111 | 0.510590521  | 0.995 | 0.583 | 6.46E-107 | 6 |
| MT-ND4.2 | 7.84E-105 | 0.563831964  | 0.999 | 0.867 | 1.80E-100 | 6 |
| IL32.6   | 1.67E-103 | -2.976091022 | 0.323 | 0.592 | 3.83E-99  | 6 |
| CD2.5    | 3.41E-102 | -2.558228706 | 0.094 | 0.477 | 7.84E-98  | 6 |
| RPL17.4  | 2.36E-101 | 0.505155294  | 0.997 | 0.57  | 5.43E-97  | 6 |
| CCL5.5   | 3.61E-100 | -3.651707308 | 0.291 | 0.577 | 8.30E-96  | 6 |
| HLA-A.4  | 2.22E-99  | -0.943452795 | 1     | 0.888 | 5.10E-95  | 6 |
| B2M.4    | 3.15E-99  | -0.560931106 | 1     | 0.987 | 7.23E-95  | 6 |
| CD3D.6   | 8.96E-98  | -2.540326902 | 0.138 | 0.494 | 2.06E-93  | 6 |
| EEF1B2   | 1.80E-95  | 0.548769826  | 0.997 | 0.643 | 4.14E-91  | 6 |
| MALAT1.5 | 2.10E-95  | -0.868203152 | 1     | 0.981 | 4.82E-91  | 6 |
| MT-CO3.3 | 2.28E-94  | 0.525404735  | 0.997 | 0.873 | 5.23E-90  | 6 |
| CD52.4   | 1.51E-92  | -2.607507373 | 0.289 | 0.564 | 3.47E-88  | 6 |
| TXNIP.5  | 1.26E-87  | 0.672188169  | 1     | 0.75  | 2.90E-83  | 6 |
| GZMA.5   | 1.12E-85  | -2.623602987 | 0.096 | 0.437 | 2.56E-81  | 6 |
| APP      | 1.90E-85  | -0.547567564 | 0.504 | 0.16  | 4.37E-81  | 6 |
| TRAC.6   | 1.16E-82  | -2.489358203 | 0.126 | 0.449 | 2.66E-78  | 6 |
| MT1E.2   | 5.02E-82  | -1.011488965 | 0.493 | 0.155 | 1.15E-77  | 6 |
| DUSP2.5  | 3.90E-81  | -2.503667197 | 0.125 | 0.449 | 8.96E-77  | 6 |
| RPS26.4  | 6.79E-80  | -0.780307568 | 1     | 0.863 | 1.56E-75  | 6 |
| CD3E.5   | 1.69E-79  | -1.91114787  | 0.089 | 0.415 | 3.89E-75  | 6 |
| RPL23A.4 | 1.54E-78  | -0.585216513 | 0.999 | 0.926 | 3.55E-74  | 6 |
| SOD2.5   | 1.46E-76  | -0.542690035 | 0.726 | 0.269 | 3.34E-72  | 6 |
| RPS15A.3 | 6.89E-76  | -0.544106393 | 1     | 0.93  | 1.58E-71  | 6 |
| RPL21.2  | 2.14E-73  | -0.545380455 | 1     | 0.949 | 4.93E-69  | 6 |
| HLA-C.3  | 1.33E-69  | -0.681885969 | 0.999 | 0.876 | 3.05E-65  | 6 |
| PLIN2.4  | 1.27E-66  | -0.678017559 | 0.798 | 0.31  | 2.92E-62  | 6 |
| NNMT.6   | 2.09E-66  | -1.518030408 | 0.734 | 0.274 | 4.80E-62  | 6 |
| CST7.5   | 1.57E-65  | -2.255016176 | 0.128 | 0.404 | 3.61E-61  | 6 |
| CD69.6   | 1.08E-61  | -2.729419095 | 0.382 | 0.537 | 2.47E-57  | 6 |
| PPDPF.3  | 2.67E-61  | -1.686432987 | 0.723 | 0.656 | 6.14E-57  | 6 |
| CD3G.5   | 3.99E-60  | -1.590688256 | 0.033 | 0.308 | 9.18E-56  | 6 |
| NDUFC1.5 | 2.19E-57  | -0.533023116 | 0.638 | 0.25  | 5.03E-53  | 6 |
| ETS1.6   | 1.06E-55  | -1.548565234 | 0.098 | 0.352 | 2.43E-51  | 6 |
| CRYAB.6  | 1.88E-55  | -1.440322228 | 0.621 | 0.239 | 4.32E-51  | 6 |
| GZMK.6   | 2.96E-54  | -2.896259585 | 0.137 | 0.378 | 6.79E-50  | 6 |
| NKG7.6   | 5.00E-53  | -3.003982851 | 0.233 | 0.438 | 1.15E-48  | 6 |
| TRBC2.5  | 1.25E-52  | -1.998600358 | 0.16  | 0.389 | 2.88E-48  | 6 |
| LCK.6    | 1.53E-52  | -1.353955086 | 0.052 | 0.301 | 3.52E-48  | 6 |
| TRBC1.5  | 2.11E-52  | -2.332182241 | 0.129 | 0.366 | 4.85E-48  | 6 |
| INSR     | 1.68E-51  | -0.972743681 | 0.352 | 0.125 | 3.87E-47  | 6 |
| RPL35A.3 | 6.70E-51  | -0.507892183 | 1     | 0.912 | 1.54E-46  | 6 |
| RPS25.3  | 3.20E-50  | -0.516829158 | 0.999 | 0.913 | 7.34E-46  | 6 |
| ITM2A.6  | 7.67E-50  | -1.736218864 | 0.086 | 0.323 | 1.76E-45  | 6 |
| CCL4.6   | 2.49E-48  | -2.857478759 | 0.266 | 0.45  | 5.73E-44  | 6 |
| H3F3B.3  | 3.24E-47  | -0.784199852 | 0.999 | 0.825 | 7.44E-43  | 6 |
| RPL36.4  | 6.13E-46  | -0.59971591  | 1     | 0.907 | 1.41E-41  | 6 |
| SYNE2.5  | 7.30E-46  | -1.496794667 | 0.128 | 0.344 | 1.68E-41  | 6 |
| IFITM3.6 | 7.42E-46  | -0.987227126 | 0.835 | 0.352 | 1.70E-41  | 6 |
| IL7R.4   | 6.34E-45  | -2.451675097 | 0.096 | 0.315 | 1.46E-40  | 6 |
| TUBA4A.4 | 5.84E-39  | -1.372125769 | 0.084 | 0.283 | 1.34E-34  | 6 |
| FYN.4    | 9.12E-39  | -1.23778732  | 0.077 | 0.276 | 2.10E-34  | 6 |
| CD96.6   | 1.72E-38  | -1.199770551 | 0.061 | 0.259 | 3.95E-34  | 6 |
| FOSB.2   | 3.75E-38  | -1.560074229 | 0.281 | 0.433 | 8.62E-34  | 6 |
| CD247.5  | 8.56E-38  | -1.225613286 | 0.056 | 0.251 | 1.97E-33  | 6 |
| DUSP4.5  | 1.46E-37  | -1.593190197 | 0.057 | 0.251 | 3.36E-33  | 6 |
| GNLY.6   | 4.18E-35  | -3.074805233 | 0.076 | 0.263 | 9.61E-31  | 6 |

|                |          |              |       |       |            |   |
|----------------|----------|--------------|-------|-------|------------|---|
| CD27.5         | 4.44E-35 | -1.608266939 | 0.093 | 0.277 | 1.02E-30   | 6 |
| KLF6.5         | 1.40E-33 | -1.669483942 | 0.818 | 0.639 | 3.22E-29   | 6 |
| BTG1.5         | 6.44E-31 | -0.86953365  | 0.996 | 0.834 | 1.48E-26   | 6 |
| CYB5A.2        | 7.04E-31 | -1.105092232 | 0.487 | 0.215 | 1.62E-26   | 6 |
| CRIP1.4        | 3.05E-30 | -1.439274095 | 0.141 | 0.302 | 7.02E-26   | 6 |
| LTB.5          | 3.70E-30 | -1.774849453 | 0.154 | 0.31  | 8.49E-26   | 6 |
| TPM1           | 2.16E-29 | -1.027703764 | 0.414 | 0.182 | 4.95E-25   | 6 |
| DDX5.5         | 7.58E-29 | -0.599299334 | 0.996 | 0.801 | 1.74E-24   | 6 |
| IL2RG.6        | 2.88E-28 | -1.393010214 | 0.263 | 0.379 | 6.62E-24   | 6 |
| SEPW1.6        | 6.80E-28 | -0.624465607 | 0.721 | 0.339 | 1.56E-23   | 6 |
| ATP1B1.1       | 9.24E-28 | -0.631775376 | 0.301 | 0.128 | 2.12E-23   | 6 |
| ADIRF.4        | 3.94E-27 | -1.692249885 | 0.499 | 0.227 | 9.04E-23   | 6 |
| HNRNPH1        | 3.83E-24 | -0.608392943 | 0.625 | 0.303 | 8.80E-20   | 6 |
| ANXA6.4        | 5.92E-23 | -1.048949478 | 0.124 | 0.257 | 1.36E-18   | 6 |
| HLA-DRB5.6     | 6.22E-23 | -2.274943728 | 0.297 | 0.378 | 1.43E-18   | 6 |
| ACAP1.6        | 1.61E-22 | -1.237692118 | 0.233 | 0.339 | 3.71E-18   | 6 |
| CDC42SE1.3     | 2.51E-22 | -0.576164706 | 0.468 | 0.227 | 5.76E-18   | 6 |
| S100A13        | 4.25E-22 | -0.58992197  | 0.278 | 0.125 | 9.77E-18   | 6 |
| JUNB.5         | 1.72E-21 | -1.347409187 | 0.938 | 0.711 | 3.96E-17   | 6 |
| HBA2.4         | 1.00E-20 | -2.730873151 | 0.475 | 0.238 | 2.30E-16   | 6 |
| DSTN.4         | 4.93E-20 | -0.898529545 | 0.593 | 0.291 | 1.13E-15   | 6 |
| RP11-347P5.1.6 | 1.55E-19 | -1.538308634 | 0.319 | 0.379 | 3.55E-15   | 6 |
| CD24.1         | 4.62E-19 | -1.620418812 | 0.35  | 0.168 | 1.06E-14   | 6 |
| TNFAIP3.6      | 7.38E-19 | -1.655071503 | 0.452 | 0.447 | 1.70E-14   | 6 |
| TIMP1.6        | 9.65E-19 | -0.990854991 | 0.593 | 0.298 | 2.22E-14   | 6 |
| C12orf57.3     | 4.51E-18 | -1.315312195 | 0.319 | 0.375 | 1.04E-13   | 6 |
| ANGPTL4.1      | 5.74E-18 | -1.423408248 | 0.326 | 0.158 | 1.32E-13   | 6 |
| PGK1.5         | 7.77E-18 | -0.513967052 | 0.843 | 0.428 | 1.79E-13   | 6 |
| EEF1D.3        | 2.90E-17 | -0.545830964 | 0.987 | 0.758 | 6.67E-13   | 6 |
| JUND.3         | 6.91E-17 | -1.134429304 | 0.226 | 0.314 | 1.59E-12   | 6 |
| TAGLN2.4       | 9.47E-17 | -0.527765916 | 0.662 | 0.339 | 2.18E-12   | 6 |
| SMCHD1.2       | 1.47E-16 | -0.503892816 | 0.609 | 0.311 | 3.39E-12   | 6 |
| TSC22D3.4      | 7.33E-16 | -0.90429995  | 0.992 | 0.769 | 1.68E-11   | 6 |
| HPCAL1         | 6.29E-15 | -0.565324336 | 0.318 | 0.163 | 1.44E-10   | 6 |
| CDC42SE2.2     | 2.80E-14 | -0.524708799 | 0.573 | 0.301 | 6.44E-10   | 6 |
| ADGRE5.5       | 2.84E-14 | -1.121313139 | 0.23  | 0.303 | 6.54E-10   | 6 |
| ITGB1.2        | 1.69E-13 | -0.703470167 | 0.854 | 0.442 | 3.89E-09   | 6 |
| DNAJA1.3       | 2.12E-13 | -0.547151737 | 0.585 | 0.317 | 4.87E-09   | 6 |
| UBC.3          | 4.09E-13 | -0.578440186 | 0.996 | 0.831 | 9.39E-09   | 6 |
| BIRC3.4        | 6.27E-13 | -1.361832607 | 0.205 | 0.276 | 1.44E-08   | 6 |
| CREM.3         | 7.84E-13 | -0.640570439 | 0.491 | 0.268 | 1.80E-08   | 6 |
| SUMO1          | 1.35E-12 | -0.51125244  | 0.693 | 0.366 | 3.10E-08   | 6 |
| GYPC.4         | 2.23E-12 | -0.978364053 | 0.246 | 0.31  | 5.14E-08   | 6 |
| MYL12A.3       | 4.21E-12 | -0.819006457 | 0.964 | 0.674 | 9.66E-08   | 6 |
| RPS27L.4       | 5.71E-12 | -0.616412274 | 0.835 | 0.452 | 1.31E-07   | 6 |
| BTG2.3         | 7.56E-12 | -0.537487442 | 0.612 | 0.343 | 1.74E-07   | 6 |
| APOBEC3C.1     | 1.10E-11 | -0.553543657 | 0.348 | 0.19  | 2.54E-07   | 6 |
| UBB.3          | 1.19E-11 | -0.683227441 | 0.979 | 0.705 | 2.74E-07   | 6 |
| RARRES3.5      | 1.92E-11 | -1.227074632 | 0.435 | 0.409 | 4.41E-07   | 6 |
| ANXA1.6        | 3.73E-11 | -1.018108534 | 0.87  | 0.449 | 8.57E-07   | 6 |
| MT2A.6         | 9.75E-11 | -1.942842618 | 0.866 | 0.647 | 2.24E-06   | 6 |
| LYST.3         | 1.10E-09 | -0.641693291 | 0.384 | 0.218 | 2.53E-05   | 6 |
| PIK3IP1.6      | 1.37E-09 | -0.567014839 | 0.62  | 0.343 | 3.16E-05   | 6 |
| CLEC2D.5       | 1.76E-09 | -1.188156673 | 0.281 | 0.308 | 4.04E-05   | 6 |
| RGCC.5         | 1.85E-09 | -1.597951261 | 0.27  | 0.309 | 4.24E-05   | 6 |
| LINC00152.4    | 1.91E-09 | -1.185293465 | 0.295 | 0.318 | 4.38E-05   | 6 |
| SEPT9.4        | 2.71E-09 | -0.857448193 | 0.199 | 0.253 | 6.23E-05   | 6 |
| SOD1.3         | 6.55E-09 | -0.519300185 | 0.838 | 0.461 | 0.00015057 | 6 |

|              |           |              |       |       |             |   |
|--------------|-----------|--------------|-------|-------|-------------|---|
| CALM3.1      | 1.04E-08  | -0.559725281 | 0.527 | 0.3   | 0.000238041 | 6 |
| PDCD4.3      | 1.49E-08  | -0.629072935 | 0.513 | 0.292 | 0.000342207 | 6 |
| KMT2E.5      | 4.21E-08  | -0.526387485 | 0.69  | 0.388 | 0.000968045 | 6 |
| YWHAQ.1      | 4.67E-08  | -0.60789853  | 0.593 | 0.335 | 0.001074331 | 6 |
| CYTIP.4      | 7.49E-08  | -1.237170586 | 0.602 | 0.468 | 0.0017202   | 6 |
| HBB.2        | 8.20E-08  | -3.024473159 | 0.669 | 0.376 | 0.001884086 | 6 |
| OCIAD2.4     | 1.03E-07  | -1.029664031 | 0.229 | 0.263 | 0.002376236 | 6 |
| BUB3.5       | 1.09E-07  | -0.50938702  | 0.447 | 0.261 | 0.002509726 | 6 |
| IER2.2       | 2.11E-07  | -1.24096661  | 0.441 | 0.399 | 0.004847179 | 6 |
| SEC61G.3     | 2.28E-07  | -0.688806852 | 0.774 | 0.419 | 0.005249215 | 6 |
| CD99.4       | 3.01E-07  | -0.500790298 | 0.802 | 0.451 | 0.006928332 | 6 |
| CCNL1.5      | 3.08E-07  | -0.558406279 | 0.681 | 0.383 | 0.007067803 | 6 |
| ICAM3.5      | 3.30E-07  | -0.827906881 | 0.243 | 0.274 | 0.007590396 | 6 |
| RBM8A        | 3.69E-07  | -0.559282769 | 0.62  | 0.355 | 0.008472083 | 6 |
| CYCS.3       | 5.82E-07  | -0.553361873 | 0.664 | 0.381 | 0.013367824 | 6 |
| PRDX2.3      | 6.60E-07  | -0.689620081 | 0.431 | 0.255 | 0.015165714 | 6 |
| RNF19A.5     | 1.22E-06  | -0.989207159 | 0.257 | 0.278 | 0.02805475  | 6 |
| ODF2L.3      | 1.54E-06  | -0.980067639 | 0.235 | 0.261 | 0.035433966 | 6 |
| LYST.4       | 0         | 2.05609404   | 0.821 | 0.198 | 0           | 7 |
| CD8A.2       | 0         | 2.052112401  | 0.862 | 0.198 | 0           | 7 |
| CD27.6       | 0         | 2.041209663  | 0.918 | 0.235 | 0           | 7 |
| TTN.1        | 0         | 1.950423803  | 0.589 | 0.063 | 0           | 7 |
| CD8B.2       | 0         | 1.928555356  | 0.798 | 0.153 | 0           | 7 |
| TNFRSF9.2    | 0         | 1.922476371  | 0.63  | 0.076 | 0           | 7 |
| CST7.6       | 0         | 1.913296938  | 0.954 | 0.361 | 0           | 7 |
| RP11-160E2.6 | 0         | 1.85088707   | 0.599 | 0.112 | 0           | 7 |
| VCAM1        | 0         | 1.808758921  | 0.564 | 0.073 | 0           | 7 |
| LAG3.1       | 0         | 1.766396153  | 0.613 | 0.076 | 0           | 7 |
| CD200R1      | 0         | 1.389120559  | 0.396 | 0.037 | 0           | 7 |
| ADTRP        | 0         | 1.241837114  | 0.347 | 0.016 | 0           | 7 |
| NKG7.7       | 8.82E-299 | 1.94170777   | 0.98  | 0.4   | 2.03E-294   | 7 |
| GZMK.7       | 2.05E-296 | 1.850336582  | 0.953 | 0.336 | 4.71E-292   | 7 |
| APOBEC3G.5   | 4.65E-286 | 1.843465471  | 0.813 | 0.245 | 1.07E-281   | 7 |
| PTCH2        | 1.17E-284 | 1.305730766  | 0.285 | 0.023 | 2.68E-280   | 7 |
| TRAC.7       | 3.05E-276 | 1.917344006  | 0.956 | 0.406 | 7.01E-272   | 7 |
| CCDC141      | 1.41E-266 | 1.186982487  | 0.373 | 0.044 | 3.24E-262   | 7 |
| DUSP4.6      | 1.55E-262 | 1.758278741  | 0.771 | 0.215 | 3.57E-258   | 7 |
| CCL5.6       | 1.51E-250 | 1.759991501  | 0.989 | 0.541 | 3.46E-246   | 7 |
| GZMA.6       | 9.94E-250 | 1.718071185  | 0.944 | 0.393 | 2.28E-245   | 7 |
| CD2.6        | 7.59E-248 | 1.697531573  | 0.95  | 0.433 | 1.74E-243   | 7 |
| RNU12        | 6.95E-242 | 1.406501652  | 0.387 | 0.055 | 1.60E-237   | 7 |
| DUSP2.6      | 1.80E-239 | 1.801073884  | 0.933 | 0.406 | 4.14E-235   | 7 |
| CD3D.7       | 1.07E-235 | 1.536557236  | 0.959 | 0.451 | 2.45E-231   | 7 |
| CCDC64       | 4.32E-227 | 0.98416072   | 0.316 | 0.037 | 9.93E-223   | 7 |
| CLECL1       | 9.05E-225 | 1.16180945   | 0.363 | 0.051 | 2.08E-220   | 7 |
| PRR5L        | 1.97E-208 | 0.897763057  | 0.296 | 0.035 | 4.54E-204   | 7 |
| FTH1.7       | 1.97E-203 | -2.267864704 | 0.938 | 0.964 | 4.54E-199   | 7 |
| CCND2.2      | 4.32E-202 | 1.382597996  | 0.56  | 0.139 | 9.93E-198   | 7 |
| TNIP3        | 4.78E-201 | 0.956469083  | 0.272 | 0.03  | 1.10E-196   | 7 |
| FASLG        | 1.18E-194 | 0.88291713   | 0.263 | 0.029 | 2.71E-190   | 7 |
| RNF19A.6     | 1.29E-192 | 1.411192915  | 0.734 | 0.254 | 2.98E-188   | 7 |
| ZNF331.3     | 4.13E-191 | 1.592917909  | 0.668 | 0.209 | 9.48E-187   | 7 |
| MCTP2        | 8.33E-188 | 1.024197357  | 0.379 | 0.064 | 1.91E-183   | 7 |
| CMC1.6       | 4.22E-187 | 1.643515478  | 0.739 | 0.262 | 9.70E-183   | 7 |
| NR4A2.4      | 1.80E-186 | 1.7350618    | 0.713 | 0.255 | 4.13E-182   | 7 |
| CD3G.6       | 2.15E-186 | 1.245178896  | 0.788 | 0.269 | 4.94E-182   | 7 |
| HAVCR2.3     | 2.05E-185 | 1.483399851  | 0.605 | 0.18  | 4.72E-181   | 7 |
| TOX2         | 8.29E-184 | 0.895655919  | 0.272 | 0.034 | 1.91E-179   | 7 |

|               |           |              |       |       |           |   |
|---------------|-----------|--------------|-------|-------|-----------|---|
| LIMD2.6       | 8.28E-182 | 1.330959491  | 0.757 | 0.289 | 1.90E-177 | 7 |
| SIT1.2        | 4.96E-180 | 1.066325524  | 0.498 | 0.111 | 1.14E-175 | 7 |
| ITGA4.3       | 8.00E-175 | 1.417520514  | 0.634 | 0.205 | 1.84E-170 | 7 |
| TOX.2         | 1.95E-174 | 1.051105321  | 0.437 | 0.09  | 4.49E-170 | 7 |
| MIR155HG      | 6.94E-168 | 1.069842421  | 0.331 | 0.055 | 1.59E-163 | 7 |
| TRBC2.6       | 1.25E-167 | 1.386394784  | 0.827 | 0.355 | 2.87E-163 | 7 |
| SNAP47        | 1.98E-167 | 1.095623032  | 0.388 | 0.078 | 4.55E-163 | 7 |
| TIGIT.1       | 6.89E-163 | 1.051978997  | 0.49  | 0.117 | 1.58E-158 | 7 |
| SLF1.1        | 2.82E-162 | 1.10746233   | 0.48  | 0.117 | 6.49E-158 | 7 |
| SLFN12L       | 1.27E-160 | 0.894293712  | 0.36  | 0.066 | 2.91E-156 | 7 |
| IFNG          | 2.31E-160 | 1.258711564  | 0.407 | 0.084 | 5.31E-156 | 7 |
| RUNX3.3       | 3.07E-158 | 1.352691166  | 0.604 | 0.19  | 7.06E-154 | 7 |
| FAM3C.1       | 6.50E-158 | 1.299479298  | 0.493 | 0.137 | 1.49E-153 | 7 |
| RASGRP1.1     | 7.10E-157 | 1.004968251  | 0.464 | 0.111 | 1.63E-152 | 7 |
| AC069363.1    | 3.02E-153 | 0.880897103  | 0.267 | 0.039 | 6.94E-149 | 7 |
| HLA-A.5       | 1.02E-150 | 0.875234343  | 0.998 | 0.888 | 2.35E-146 | 7 |
| ATXN1.1       | 6.82E-150 | 1.112917731  | 0.514 | 0.148 | 1.57E-145 | 7 |
| BHLHE40       | 2.49E-149 | 1.176941416  | 0.525 | 0.155 | 5.73E-145 | 7 |
| LBH.3         | 1.98E-148 | 1.190304329  | 0.577 | 0.181 | 4.54E-144 | 7 |
| DTHD1         | 2.35E-147 | 1.004111072  | 0.354 | 0.069 | 5.41E-143 | 7 |
| CRIP1.5       | 1.04E-146 | 1.258350856  | 0.71  | 0.273 | 2.39E-142 | 7 |
| CH17-373J23.1 | 2.53E-146 | 1.283260952  | 0.426 | 0.103 | 5.82E-142 | 7 |
| ARAP2.1       | 1.10E-144 | 1.080466472  | 0.486 | 0.132 | 2.52E-140 | 7 |
| IL2RG.7       | 4.39E-142 | 1.146049604  | 0.8   | 0.351 | 1.01E-137 | 7 |
| NPIP5.1       | 5.45E-140 | 1.056653105  | 0.419 | 0.106 | 1.25E-135 | 7 |
| RP11-386i14.4 | 3.52E-139 | 1.729513168  | 0.385 | 0.093 | 8.08E-135 | 7 |
| PTPN7.4       | 2.10E-137 | 1.114066205  | 0.604 | 0.203 | 4.83E-133 | 7 |
| TRAF5         | 1.21E-136 | 1.020828651  | 0.373 | 0.085 | 2.77E-132 | 7 |
| TSC22D3.5     | 8.60E-132 | -2.068954987 | 0.484 | 0.795 | 1.98E-127 | 7 |
| AC090498.1.4  | 1.56E-131 | 1.002458263  | 0.883 | 0.482 | 3.58E-127 | 7 |
| RPL39.2       | 1.94E-130 | -0.915231818 | 0.976 | 0.943 | 4.47E-126 | 7 |
| TMSB10.5      | 1.06E-124 | -1.111349987 | 0.965 | 0.96  | 2.43E-120 | 7 |
| PTPRC.7       | 1.28E-124 | 0.969071009  | 0.951 | 0.6   | 2.95E-120 | 7 |
| SPN.2         | 1.68E-124 | 1.056787577  | 0.472 | 0.143 | 3.87E-120 | 7 |
| SIRPG.1       | 2.14E-122 | 0.805798755  | 0.343 | 0.075 | 4.91E-118 | 7 |
| WDR74         | 6.22E-122 | 1.069233355  | 0.432 | 0.124 | 1.43E-117 | 7 |
| DGKH          | 1.52E-121 | 0.953125607  | 0.329 | 0.073 | 3.50E-117 | 7 |
| EOMES.1       | 2.19E-121 | 0.819048904  | 0.34  | 0.074 | 5.03E-117 | 7 |
| FTL.6         | 6.76E-121 | -2.111912788 | 0.904 | 0.939 | 1.55E-116 | 7 |
| PDCD1         | 1.26E-120 | 0.780895898  | 0.273 | 0.05  | 2.89E-116 | 7 |
| LCK.7         | 3.10E-120 | 0.997994882  | 0.681 | 0.268 | 7.12E-116 | 7 |
| SRSF7.5       | 8.54E-119 | 1.070631246  | 0.874 | 0.528 | 1.96E-114 | 7 |
| CREM.4        | 1.21E-118 | 1.319671285  | 0.631 | 0.263 | 2.78E-114 | 7 |
| FUT8          | 3.59E-117 | 0.889207931  | 0.3   | 0.064 | 8.25E-113 | 7 |
| TXNIP.6       | 1.50E-112 | -2.05038047  | 0.566 | 0.773 | 3.45E-108 | 7 |
| SH2D2A        | 4.36E-112 | 0.808053594  | 0.369 | 0.092 | 1.00E-107 | 7 |
| FNBP1.6       | 9.67E-112 | 1.003867162  | 0.725 | 0.35  | 2.22E-107 | 7 |
| NAB1          | 1.05E-110 | 0.744410728  | 0.261 | 0.051 | 2.41E-106 | 7 |
| VPS37B        | 6.40E-109 | 0.814913597  | 0.399 | 0.109 | 1.47E-104 | 7 |
| TMEM107       | 1.39E-108 | 1.042015413  | 0.387 | 0.111 | 3.20E-104 | 7 |
| PYHIN1.3      | 1.58E-108 | 0.928335238  | 0.548 | 0.188 | 3.64E-104 | 7 |
| MALAT1.6      | 1.44E-106 | 0.552037923  | 1     | 0.982 | 3.31E-102 | 7 |
| CD3E.6        | 6.19E-106 | 0.846529536  | 0.812 | 0.377 | 1.42E-101 | 7 |
| CDK6          | 2.23E-104 | 0.959292124  | 0.338 | 0.09  | 5.14E-100 | 7 |
| RPL3.4        | 3.93E-103 | -0.818922913 | 0.982 | 0.93  | 9.04E-99  | 7 |
| TRAF1         | 1.93E-102 | 0.80722233   | 0.288 | 0.065 | 4.44E-98  | 7 |
| SLC38A1.4     | 4.44E-102 | 0.941309005  | 0.555 | 0.21  | 1.02E-97  | 7 |
| HLA-F.6       | 5.21E-102 | 0.963941146  | 0.771 | 0.422 | 1.20E-97  | 7 |

|            |           |              |       |       |          |   |
|------------|-----------|--------------|-------|-------|----------|---|
| SUB1.2     | 3.47E-101 | 0.892430055  | 0.857 | 0.56  | 7.96E-97 | 7 |
| GTPBP8     | 5.85E-101 | 0.815403267  | 0.285 | 0.065 | 1.34E-96 | 7 |
| MSI2.3     | 8.95E-101 | 0.949946052  | 0.445 | 0.146 | 2.06E-96 | 7 |
| XIST.5     | 4.21E-100 | 0.851046907  | 0.798 | 0.406 | 9.67E-96 | 7 |
| PRF1.1     | 7.28E-100 | 0.615710188  | 0.571 | 0.199 | 1.67E-95 | 7 |
| LTB.6      | 8.40E-100 | 1.023799591  | 0.66  | 0.284 | 1.93E-95 | 7 |
| IL32.7     | 1.37E-99  | 0.886964305  | 0.91  | 0.561 | 3.16E-95 | 7 |
| FAM118A    | 2.94E-98  | 0.86672024   | 0.316 | 0.081 | 6.75E-94 | 7 |
| CCL4L2.3   | 2.46E-97  | 1.356257595  | 0.504 | 0.177 | 5.66E-93 | 7 |
| HNRNP.LL.1 | 7.78E-97  | 0.832964027  | 0.36  | 0.103 | 1.79E-92 | 7 |
| ACAP1.7    | 1.14E-96  | 0.889891709  | 0.692 | 0.315 | 2.62E-92 | 7 |
| RAB27A.1   | 7.88E-95  | 0.83283084   | 0.445 | 0.148 | 1.81E-90 | 7 |
| TPT1.5     | 1.01E-94  | -0.861987182 | 0.971 | 0.921 | 2.32E-90 | 7 |
| RPS18.4    | 1.49E-94  | -0.72618935  | 0.991 | 0.957 | 3.43E-90 | 7 |
| CRTAM.1    | 4.46E-94  | 1.061261682  | 0.323 | 0.084 | 1.03E-89 | 7 |
| HLA-B.5    | 7.51E-94  | 0.564886445  | 0.997 | 0.91  | 1.73E-89 | 7 |
| APMAP.2    | 9.37E-93  | 0.890779075  | 0.507 | 0.198 | 2.15E-88 | 7 |
| CHST12.3   | 5.61E-92  | 0.872501773  | 0.513 | 0.194 | 1.29E-87 | 7 |
| VIM.5      | 1.00E-91  | -1.798723913 | 0.63  | 0.778 | 2.31E-87 | 7 |
| RPL13.4    | 1.31E-89  | -0.662073389 | 0.988 | 0.964 | 3.00E-85 | 7 |
| APOE.6     | 1.36E-89  | -3.481241038 | 0.047 | 0.457 | 3.14E-85 | 7 |
| FOS.5      | 1.50E-89  | -1.942113379 | 0.373 | 0.697 | 3.45E-85 | 7 |
| APOBEC3C.2 | 2.33E-89  | 0.951950687  | 0.489 | 0.184 | 5.37E-85 | 7 |
| UBE2F      | 3.06E-89  | 1.121660072  | 0.361 | 0.116 | 7.03E-85 | 7 |
| RNF213.5   | 3.58E-89  | 0.942790264  | 0.706 | 0.372 | 8.24E-85 | 7 |
| CCL4.7     | 6.91E-89  | 0.833154349  | 0.829 | 0.421 | 1.59E-84 | 7 |
| SLA2       | 9.48E-89  | 0.632715747  | 0.256 | 0.057 | 2.18E-84 | 7 |
| WIPF1.7    | 1.05E-88  | 0.911740682  | 0.662 | 0.327 | 2.41E-84 | 7 |
| CLEC2D.6   | 1.59E-87  | 0.8649964    | 0.648 | 0.289 | 3.66E-83 | 7 |
| BCL11B     | 2.01E-87  | 0.82783921   | 0.402 | 0.126 | 4.62E-83 | 7 |
| ARHGAP30.2 | 2.13E-87  | 0.914337379  | 0.514 | 0.21  | 4.90E-83 | 7 |
| PRKCH.6    | 3.51E-87  | 0.84748133   | 0.568 | 0.238 | 8.06E-83 | 7 |
| PLEK.1     | 4.38E-87  | 0.89669665   | 0.408 | 0.139 | 1.01E-82 | 7 |
| KIAA1551.5 | 3.92E-86  | 0.910802834  | 0.659 | 0.32  | 9.01E-82 | 7 |
| S100A10.3  | 2.46E-85  | -1.936466656 | 0.276 | 0.627 | 5.65E-81 | 7 |
| IKZF3.3    | 1.22E-84  | 0.858791972  | 0.458 | 0.163 | 2.80E-80 | 7 |
| TBC1D10C.4 | 2.23E-83  | 0.856486218  | 0.534 | 0.217 | 5.13E-79 | 7 |
| TMSB4X.3   | 5.05E-83  | 0.540333707  | 0.998 | 0.976 | 1.16E-78 | 7 |
| ANXA1.7    | 6.18E-83  | -2.182870238 | 0.1   | 0.49  | 1.42E-78 | 7 |
| RPL7.4     | 9.33E-83  | -0.795229723 | 0.954 | 0.918 | 2.14E-78 | 7 |
| RPL17.5    | 1.17E-82  | 0.728169899  | 0.894 | 0.578 | 2.68E-78 | 7 |
| CD82.1     | 1.75E-82  | 0.811596338  | 0.337 | 0.102 | 4.02E-78 | 7 |
| HCST.5     | 2.27E-82  | 0.798792432  | 0.873 | 0.528 | 5.21E-78 | 7 |
| PAG1       | 2.68E-82  | 0.892024002  | 0.464 | 0.184 | 6.16E-78 | 7 |
| DENND2D.1  | 3.31E-82  | 0.81031825   | 0.399 | 0.133 | 7.60E-78 | 7 |
| DZIP3      | 5.19E-82  | 0.741467401  | 0.284 | 0.075 | 1.19E-77 | 7 |
| ITGB2.5    | 8.22E-82  | 0.820332531  | 0.754 | 0.398 | 1.89E-77 | 7 |
| FKBP5.3    | 9.97E-82  | -1.734318831 | 0.029 | 0.414 | 2.29E-77 | 7 |
| LAT.2      | 1.24E-80  | 0.789470356  | 0.437 | 0.154 | 2.85E-76 | 7 |
| TXK.2      | 6.86E-80  | 0.673621942  | 0.343 | 0.099 | 1.58E-75 | 7 |
| RPS8.3     | 9.36E-80  | -0.809772832 | 0.973 | 0.915 | 2.15E-75 | 7 |
| ITM2A.7    | 1.87E-79  | 0.807700319  | 0.645 | 0.294 | 4.31E-75 | 7 |
| NCL.3      | 3.08E-79  | 0.821864173  | 0.731 | 0.416 | 7.09E-75 | 7 |
| RPL10.4    | 5.12E-79  | -0.597430622 | 0.992 | 0.974 | 1.18E-74 | 7 |
| DUSP1.4    | 5.36E-79  | -1.475904286 | 0.663 | 0.8   | 1.23E-74 | 7 |
| ETS1.7     | 4.70E-78  | 0.763670597  | 0.68  | 0.321 | 1.08E-73 | 7 |
| ITGAL      | 5.61E-78  | 0.739518741  | 0.316 | 0.092 | 1.29E-73 | 7 |
| AKNA.5     | 6.04E-78  | 0.855963529  | 0.557 | 0.246 | 1.39E-73 | 7 |

|             |          |              |       |       |          |   |
|-------------|----------|--------------|-------|-------|----------|---|
| RPL8.1      | 7.18E-78 | -0.840862491 | 0.933 | 0.88  | 1.65E-73 | 7 |
| TMEM2.2     | 8.70E-78 | 0.806012745  | 0.449 | 0.165 | 2.00E-73 | 7 |
| CORO1A.5    | 2.61E-77 | 0.762648777  | 0.857 | 0.55  | 6.00E-73 | 7 |
| SMG1.1      | 2.92E-77 | 0.87680121   | 0.476 | 0.198 | 6.70E-73 | 7 |
| RGS1.7      | 6.59E-77 | 0.72956139   | 0.956 | 0.684 | 1.51E-72 | 7 |
| ASXL2       | 1.99E-76 | 0.788725776  | 0.281 | 0.078 | 4.57E-72 | 7 |
| TYROBP.7    | 7.61E-76 | -2.814712322 | 0.042 | 0.405 | 1.75E-71 | 7 |
| LINC00152.5 | 1.97E-75 | 0.70082925   | 0.631 | 0.301 | 4.52E-71 | 7 |
| LINC01116.1 | 3.22E-73 | 0.788119311  | 0.381 | 0.137 | 7.39E-69 | 7 |
| PTPN22      | 4.67E-73 | 0.784491493  | 0.363 | 0.123 | 1.07E-68 | 7 |
| EEF1A1.4    | 6.89E-73 | -0.559340416 | 0.997 | 0.966 | 1.58E-68 | 7 |
| CD247.6     | 7.23E-73 | 0.657102192  | 0.546 | 0.226 | 1.66E-68 | 7 |
| SYTL2       | 2.66E-72 | 0.654319432  | 0.303 | 0.089 | 6.11E-68 | 7 |
| ARID4B.6    | 7.91E-72 | 0.793461048  | 0.628 | 0.326 | 1.82E-67 | 7 |
| CCL3.2      | 2.43E-71 | 0.774958478  | 0.463 | 0.188 | 5.58E-67 | 7 |
| CXCR3       | 2.54E-71 | 0.635605259  | 0.307 | 0.09  | 5.85E-67 | 7 |
| ZBTB1       | 4.38E-71 | 0.694186683  | 0.288 | 0.085 | 1.01E-66 | 7 |
| SYNE2.6     | 9.33E-71 | 0.798169788  | 0.646 | 0.317 | 2.14E-66 | 7 |
| MBNL1.4     | 3.92E-70 | 0.839252152  | 0.63  | 0.342 | 9.01E-66 | 7 |
| ICOS        | 9.91E-70 | 0.718298816  | 0.287 | 0.083 | 2.28E-65 | 7 |
| SYNRG.1     | 2.15E-69 | 0.817949746  | 0.423 | 0.168 | 4.95E-65 | 7 |
| SON.6       | 3.72E-69 | 0.650162663  | 0.854 | 0.556 | 8.55E-65 | 7 |
| LINC00649.1 | 4.72E-69 | 0.636229795  | 0.261 | 0.071 | 1.08E-64 | 7 |
| RPS2.3      | 5.03E-69 | -0.590425298 | 0.992 | 0.942 | 1.16E-64 | 7 |
| ANKRD36C.1  | 9.24E-69 | 0.810128586  | 0.42  | 0.166 | 2.12E-64 | 7 |
| RAB8B       | 9.95E-69 | 0.757731481  | 0.341 | 0.12  | 2.29E-64 | 7 |
| CST3.6      | 1.51E-68 | -2.766784151 | 0.065 | 0.401 | 3.47E-64 | 7 |
| CTSW.3      | 1.66E-68 | 0.702710838  | 0.511 | 0.208 | 3.82E-64 | 7 |
| STK17B.3    | 1.19E-67 | 0.734441233  | 0.701 | 0.386 | 2.75E-63 | 7 |
| EVL.6       | 1.26E-67 | 0.700321391  | 0.785 | 0.481 | 2.89E-63 | 7 |
| RPL35.2     | 2.22E-66 | -0.710522671 | 0.964 | 0.894 | 5.10E-62 | 7 |
| ATRX.4      | 4.65E-66 | 0.786233214  | 0.662 | 0.373 | 1.07E-61 | 7 |
| PRPF4B      | 7.99E-65 | 0.744870785  | 0.49  | 0.225 | 1.84E-60 | 7 |
| ANKRD36.1   | 8.95E-65 | 0.717906784  | 0.343 | 0.122 | 2.06E-60 | 7 |
| GPBP1.5     | 1.18E-64 | 0.727381323  | 0.616 | 0.332 | 2.72E-60 | 7 |
| RPS14.4     | 1.27E-64 | -0.55996802  | 0.985 | 0.945 | 2.91E-60 | 7 |
| TRBC1.6     | 1.32E-64 | 1.327176781  | 0.622 | 0.34  | 3.03E-60 | 7 |
| LYZ.6       | 3.32E-64 | -3.242944637 | 0.044 | 0.366 | 7.62E-60 | 7 |
| PARK7.4     | 3.44E-64 | 0.645294343  | 0.75  | 0.479 | 7.90E-60 | 7 |
| TRAF3IP3.7  | 5.32E-64 | 0.738505928  | 0.527 | 0.242 | 1.22E-59 | 7 |
| GGA2.1      | 9.33E-64 | 0.732907898  | 0.317 | 0.111 | 2.14E-59 | 7 |
| SPTAN1      | 9.40E-64 | 0.697711476  | 0.316 | 0.106 | 2.16E-59 | 7 |
| RPL34.5     | 2.08E-63 | -0.584485601 | 0.989 | 0.951 | 4.79E-59 | 7 |
| OTULIN      | 6.28E-63 | 0.687947331  | 0.267 | 0.082 | 1.44E-58 | 7 |
| RPL36.5     | 1.51E-62 | -0.742865965 | 0.962 | 0.91  | 3.47E-58 | 7 |
| GOLGA4      | 1.93E-62 | 0.831650038  | 0.473 | 0.22  | 4.43E-58 | 7 |
| PRRC2C.4    | 6.34E-62 | 0.713368617  | 0.701 | 0.42  | 1.46E-57 | 7 |
| PRPF38B.7   | 1.02E-61 | 0.736219968  | 0.704 | 0.422 | 2.34E-57 | 7 |
| DOCK8.5     | 1.21E-61 | 0.756469337  | 0.548 | 0.279 | 2.78E-57 | 7 |
| NIN.1       | 3.79E-61 | 0.797679621  | 0.344 | 0.131 | 8.70E-57 | 7 |
| SH3KBP1.5   | 1.93E-60 | 0.705669162  | 0.569 | 0.295 | 4.44E-56 | 7 |
| ANXA6.5     | 2.94E-60 | 0.715614117  | 0.508 | 0.237 | 6.76E-56 | 7 |
| PTPN6       | 3.76E-60 | 0.807386526  | 0.384 | 0.16  | 8.63E-56 | 7 |
| RPL18A.3    | 7.44E-60 | -0.593889241 | 0.98  | 0.927 | 1.71E-55 | 7 |
| GLUL.5      | 1.90E-59 | -1.787673944 | 0.017 | 0.321 | 4.37E-55 | 7 |
| TIMP1.7     | 2.98E-59 | -2.007220429 | 0.024 | 0.328 | 6.85E-55 | 7 |
| DDX24.5     | 4.56E-59 | 0.619271034  | 0.73  | 0.443 | 1.05E-54 | 7 |
| RAC2.7      | 1.11E-58 | 0.635872833  | 0.666 | 0.358 | 2.54E-54 | 7 |

|                |          |              |       |       |          |   |
|----------------|----------|--------------|-------|-------|----------|---|
| ARHGAP9.2      | 1.25E-58 | 0.690728742  | 0.414 | 0.172 | 2.87E-54 | 7 |
| NFAT5.1        | 1.49E-58 | 0.689157535  | 0.316 | 0.114 | 3.42E-54 | 7 |
| IRF1.5         | 1.79E-58 | 0.780524893  | 0.581 | 0.297 | 4.12E-54 | 7 |
| BCLAF1.4       | 7.82E-58 | 0.648057793  | 0.599 | 0.322 | 1.80E-53 | 7 |
| RPS3A.1        | 1.33E-57 | -0.556339708 | 0.976 | 0.927 | 3.06E-53 | 7 |
| NBEAL1.1       | 1.40E-57 | 0.608906325  | 0.842 | 0.604 | 3.23E-53 | 7 |
| HNRNPA1L2.1    | 1.55E-57 | 0.725829645  | 0.366 | 0.15  | 3.57E-53 | 7 |
| PTMS.2         | 2.38E-57 | 0.627362514  | 0.484 | 0.23  | 5.47E-53 | 7 |
| TRAT1.2        | 4.62E-57 | 0.5989976    | 0.343 | 0.122 | 1.06E-52 | 7 |
| SEPT1.3        | 4.77E-57 | 0.628742757  | 0.46  | 0.201 | 1.10E-52 | 7 |
| SCAPER         | 7.03E-57 | 0.708596322  | 0.308 | 0.111 | 1.62E-52 | 7 |
| HBB.3          | 3.14E-56 | -4.10390998  | 0.093 | 0.406 | 7.22E-52 | 7 |
| RHOH.3         | 4.65E-56 | 0.631233305  | 0.476 | 0.215 | 1.07E-51 | 7 |
| SRSF5.4        | 5.39E-56 | 0.540984545  | 0.877 | 0.61  | 1.24E-51 | 7 |
| RPL11.1        | 9.15E-56 | -0.525854397 | 0.983 | 0.936 | 2.10E-51 | 7 |
| SLA.6          | 9.55E-56 | 0.727568229  | 0.675 | 0.386 | 2.19E-51 | 7 |
| CBLB.3         | 1.12E-55 | 0.681821589  | 0.417 | 0.177 | 2.57E-51 | 7 |
| P2RY10         | 3.65E-55 | 0.541889396  | 0.272 | 0.086 | 8.38E-51 | 7 |
| PNISR.5        | 6.22E-55 | 0.660773494  | 0.765 | 0.498 | 1.43E-50 | 7 |
| NNMT.7         | 8.64E-55 | -2.618003739 | 0.024 | 0.313 | 1.99E-50 | 7 |
| RPL32.1        | 9.46E-55 | -0.534759961 | 0.98  | 0.924 | 2.17E-50 | 7 |
| HMGN1.1        | 1.32E-54 | 0.576967392  | 0.771 | 0.491 | 3.04E-50 | 7 |
| LCP1.6         | 1.63E-54 | 0.632909207  | 0.687 | 0.39  | 3.74E-50 | 7 |
| SH2D1A.1       | 2.28E-54 | 0.608720001  | 0.357 | 0.133 | 5.25E-50 | 7 |
| IL7R.5         | 2.80E-54 | -2.389347021 | 0.032 | 0.317 | 6.43E-50 | 7 |
| RP5-117110.5.2 | 4.84E-54 | 0.687288976  | 0.338 | 0.13  | 1.11E-49 | 7 |
| FYB.5          | 7.81E-54 | 0.586764712  | 0.757 | 0.445 | 1.79E-49 | 7 |
| ARGLU1.4       | 1.15E-53 | 0.686163674  | 0.681 | 0.421 | 2.65E-49 | 7 |
| CEBPD.5        | 1.28E-53 | -1.692698247 | 0.014 | 0.292 | 2.95E-49 | 7 |
| IL2RB.1        | 2.40E-53 | 0.531051303  | 0.263 | 0.083 | 5.53E-49 | 7 |
| RGS2.6         | 3.53E-53 | 0.817638835  | 0.593 | 0.322 | 8.10E-49 | 7 |
| MT-ND6.1       | 4.00E-53 | 0.73573999   | 0.413 | 0.19  | 9.19E-49 | 7 |
| SYTL3.6        | 8.71E-53 | 0.631246399  | 0.543 | 0.264 | 2.00E-48 | 7 |
| ILF3           | 1.74E-52 | 0.705294954  | 0.425 | 0.198 | 3.99E-48 | 7 |
| IGFBP7.7       | 2.49E-52 | -3.421564273 | 0.105 | 0.392 | 5.73E-48 | 7 |
| RPS15.4        | 3.04E-52 | -0.518549845 | 0.98  | 0.929 | 6.98E-48 | 7 |
| NKTR.6         | 6.43E-52 | 0.709864646  | 0.598 | 0.334 | 1.48E-47 | 7 |
| DRAP1.2        | 8.22E-52 | 0.626885016  | 0.613 | 0.358 | 1.89E-47 | 7 |
| CYLD.1         | 1.29E-51 | 0.713439401  | 0.384 | 0.168 | 2.96E-47 | 7 |
| FCER1G.7       | 1.66E-51 | -2.125841525 | 0.041 | 0.316 | 3.81E-47 | 7 |
| SURF4          | 2.41E-51 | 0.698232497  | 0.358 | 0.152 | 5.54E-47 | 7 |
| KIF2A          | 2.53E-51 | 0.671553826  | 0.303 | 0.114 | 5.82E-47 | 7 |
| SAMD9L         | 3.18E-51 | 0.671557135  | 0.334 | 0.134 | 7.31E-47 | 7 |
| PSMB9.2        | 3.69E-51 | 0.528545128  | 0.747 | 0.471 | 8.48E-47 | 7 |
| SHFM1.3        | 3.98E-51 | 0.53158648   | 0.653 | 0.395 | 9.15E-47 | 7 |
| APOC1.5        | 6.06E-51 | -2.509883156 | 0.024 | 0.296 | 1.39E-46 | 7 |
| RPS6.2         | 9.10E-51 | -0.545102139 | 0.983 | 0.941 | 2.09E-46 | 7 |
| RFTN1          | 1.95E-50 | 0.644810096  | 0.307 | 0.116 | 4.48E-46 | 7 |
| SMC4.1         | 2.05E-50 | 0.707906711  | 0.346 | 0.142 | 4.72E-46 | 7 |
| IRF2           | 2.91E-50 | 0.680727813  | 0.392 | 0.179 | 6.68E-46 | 7 |
| AKAP9.3        | 5.43E-50 | 0.69868741   | 0.566 | 0.331 | 1.25E-45 | 7 |
| TUBA4A.5       | 1.04E-49 | 0.621981897  | 0.527 | 0.26  | 2.40E-45 | 7 |
| GPX1.7         | 1.05E-49 | -2.168819826 | 0.185 | 0.441 | 2.41E-45 | 7 |
| RPL37A         | 1.31E-49 | -0.514935535 | 0.974 | 0.903 | 3.01E-45 | 7 |
| MT-ND4L.3      | 2.31E-49 | 0.652470459  | 0.612 | 0.348 | 5.31E-45 | 7 |
| NDUFA4L2.7     | 2.57E-49 | -2.746586664 | 0.033 | 0.301 | 5.91E-45 | 7 |
| TPR.2          | 2.66E-49 | 0.662655978  | 0.537 | 0.297 | 6.10E-45 | 7 |
| SAMD3.2        | 3.55E-49 | 0.646591656  | 0.316 | 0.118 | 8.16E-45 | 7 |



|            |          |              |       |       |          |   |
|------------|----------|--------------|-------|-------|----------|---|
| C12orf57.4 | 4.79E-49 | 0.561413282  | 0.63  | 0.359 | 1.10E-44 | 7 |
| DGKZ       | 9.69E-49 | 0.637640276  | 0.355 | 0.149 | 2.23E-44 | 7 |
| RPL14.3    | 1.01E-48 | -0.640087275 | 0.951 | 0.865 | 2.31E-44 | 7 |
| KMT2A      | 1.71E-48 | 0.694648791  | 0.36  | 0.157 | 3.94E-44 | 7 |
| GOLGA8B.1  | 2.06E-48 | 0.581766922  | 0.258 | 0.088 | 4.74E-44 | 7 |
| RARRES3.6  | 3.34E-48 | 0.567723824  | 0.672 | 0.398 | 7.68E-44 | 7 |
| IGKC.4     | 1.18E-47 | -4.253183715 | 0.039 | 0.309 | 2.70E-43 | 7 |
| RCAN3.2    | 1.39E-47 | 0.638180009  | 0.352 | 0.146 | 3.20E-43 | 7 |
| GCC2.5     | 1.55E-47 | 0.647703197  | 0.593 | 0.348 | 3.56E-43 | 7 |
| CRYAB.7    | 1.64E-47 | -2.342043063 | 0.015 | 0.271 | 3.76E-43 | 7 |
| RASSF5.1   | 1.84E-47 | 0.583132272  | 0.355 | 0.149 | 4.24E-43 | 7 |
| DDX17.4    | 3.42E-47 | 0.632006372  | 0.637 | 0.387 | 7.87E-43 | 7 |
| WNK1.3     | 4.98E-47 | 0.621682447  | 0.47  | 0.238 | 1.14E-42 | 7 |
| CLDND1.2   | 4.99E-47 | 0.780525402  | 0.404 | 0.191 | 1.15E-42 | 7 |
| ITM2B.6    | 7.58E-47 | -1.103193607 | 0.778 | 0.779 | 1.74E-42 | 7 |
| NIPBL.2    | 1.28E-46 | 0.705039257  | 0.414 | 0.204 | 2.94E-42 | 7 |
| TANK.1     | 1.56E-46 | 0.638613449  | 0.442 | 0.22  | 3.59E-42 | 7 |
| TERF2IP.5  | 1.62E-46 | 0.523705986  | 0.605 | 0.353 | 3.73E-42 | 7 |
| BOD1L1     | 4.85E-46 | 0.618587613  | 0.335 | 0.143 | 1.12E-41 | 7 |
| TMEM123.4  | 5.39E-46 | -1.09267937  | 0.027 | 0.283 | 1.24E-41 | 7 |
| SRRM2.2    | 5.85E-46 | 0.641830561  | 0.566 | 0.33  | 1.34E-41 | 7 |
| PSMB10.2   | 7.87E-46 | 0.645664408  | 0.451 | 0.236 | 1.81E-41 | 7 |
| PLIN2.5    | 9.57E-46 | -1.819447307 | 0.083 | 0.348 | 2.20E-41 | 7 |
| C1QA.7     | 3.01E-45 | -2.289763003 | 0.017 | 0.262 | 6.92E-41 | 7 |
| ITM2C.2    | 4.46E-45 | 0.662008074  | 0.352 | 0.147 | 1.02E-40 | 7 |
| ZCCHC11    | 4.84E-45 | 0.717905879  | 0.378 | 0.177 | 1.11E-40 | 7 |
| VPS13C.2   | 5.00E-45 | 0.65657341   | 0.414 | 0.205 | 1.15E-40 | 7 |
| ASH1L      | 1.03E-44 | 0.659311504  | 0.437 | 0.222 | 2.36E-40 | 7 |
| IFITM3.7   | 2.11E-44 | -2.151955228 | 0.135 | 0.39  | 4.84E-40 | 7 |
| ITSN2.3    | 3.67E-44 | 0.704037962  | 0.442 | 0.229 | 8.42E-40 | 7 |
| TAF7.4     | 4.16E-44 | 0.581305432  | 0.548 | 0.309 | 9.55E-40 | 7 |
| ZBTB38.2   | 4.90E-44 | 0.587844763  | 0.454 | 0.227 | 1.13E-39 | 7 |
| CCDC12.2   | 4.91E-44 | 0.621194774  | 0.437 | 0.219 | 1.13E-39 | 7 |
| PSTPIP1.1  | 2.59E-43 | 0.592990834  | 0.305 | 0.123 | 5.95E-39 | 7 |
| M6PR.2     | 4.25E-43 | 0.654876013  | 0.439 | 0.231 | 9.76E-39 | 7 |
| IL16       | 4.52E-43 | 0.650113395  | 0.314 | 0.132 | 1.04E-38 | 7 |
| BPTF.1     | 4.96E-43 | 0.655945296  | 0.414 | 0.208 | 1.14E-38 | 7 |
| PTPRA      | 5.68E-43 | 0.659570011  | 0.355 | 0.163 | 1.30E-38 | 7 |
| NSD1       | 7.47E-43 | 0.59962649   | 0.313 | 0.133 | 1.72E-38 | 7 |
| CDK12      | 1.34E-42 | 0.58990649   | 0.314 | 0.135 | 3.09E-38 | 7 |
| SERPINA1.6 | 1.77E-42 | -1.846127279 | 0.047 | 0.29  | 4.07E-38 | 7 |
| HNRNPD.2   | 2.43E-42 | 0.620835087  | 0.443 | 0.237 | 5.59E-38 | 7 |
| SRSF9      | 3.31E-42 | 0.590243024  | 0.446 | 0.24  | 7.61E-38 | 7 |
| JUND.4     | 7.43E-42 | 0.504941052  | 0.54  | 0.298 | 1.71E-37 | 7 |
| ADIRF.5    | 2.50E-41 | -2.341353572 | 0.021 | 0.252 | 5.74E-37 | 7 |
| CCDC186    | 3.14E-41 | 0.578574076  | 0.323 | 0.142 | 7.22E-37 | 7 |
| IFI16.3    | 6.21E-41 | 0.501468187  | 0.716 | 0.469 | 1.43E-36 | 7 |
| HNRNPA3.1  | 6.47E-41 | 0.504271531  | 0.693 | 0.452 | 1.49E-36 | 7 |
| HERC2      | 1.58E-40 | 0.655255314  | 0.29  | 0.123 | 3.63E-36 | 7 |
| KMT2E.6    | 1.89E-40 | 0.543385728  | 0.624 | 0.393 | 4.34E-36 | 7 |
| CHD3       | 2.23E-40 | 0.519744544  | 0.27  | 0.106 | 5.12E-36 | 7 |
| PCSK7.6    | 4.82E-40 | 0.521133738  | 0.549 | 0.309 | 1.11E-35 | 7 |
| TSPYL2.4   | 1.16E-39 | 0.813118316  | 0.443 | 0.229 | 2.66E-35 | 7 |
| RBM25.4    | 1.38E-39 | 0.526783471  | 0.578 | 0.349 | 3.16E-35 | 7 |
| RBM23      | 1.41E-39 | 0.568400055  | 0.357 | 0.169 | 3.23E-35 | 7 |
| NELFCD.2   | 1.49E-39 | 0.586881331  | 0.308 | 0.134 | 3.43E-35 | 7 |
| MT-ND5.5   | 1.85E-39 | 0.524203925  | 0.86  | 0.598 | 4.25E-35 | 7 |
| SRSF2.6    | 4.73E-39 | 0.529396235  | 0.642 | 0.412 | 1.09E-34 | 7 |

|              |          |              |       |       |          |   |
|--------------|----------|--------------|-------|-------|----------|---|
| SFPQ.2       | 4.86E-39 | 0.606989516  | 0.514 | 0.301 | 1.12E-34 | 7 |
| MLLT6        | 8.55E-39 | 0.578860147  | 0.255 | 0.098 | 1.96E-34 | 7 |
| BTG2.4       | 1.02E-38 | 0.56641648   | 0.58  | 0.346 | 2.34E-34 | 7 |
| ASCC3        | 1.03E-38 | 0.572145299  | 0.255 | 0.101 | 2.36E-34 | 7 |
| DDX3X.7      | 1.05E-38 | 0.506575923  | 0.639 | 0.403 | 2.42E-34 | 7 |
| AC092580.4.2 | 1.36E-38 | 0.533729525  | 0.384 | 0.172 | 3.12E-34 | 7 |
| ICAM3.6      | 1.37E-38 | 0.50749235   | 0.493 | 0.261 | 3.14E-34 | 7 |
| PCM1.2       | 1.44E-38 | 0.6038741    | 0.445 | 0.243 | 3.31E-34 | 7 |
| GNLY.7       | 1.46E-38 | -3.069477055 | 0.039 | 0.263 | 3.37E-34 | 7 |
| SLFN5.2      | 1.72E-38 | 0.543603438  | 0.402 | 0.196 | 3.95E-34 | 7 |
| RPL29        | 2.23E-38 | -0.561128755 | 0.936 | 0.851 | 5.13E-34 | 7 |
| NFKBIA.5     | 2.42E-38 | -1.290484173 | 0.338 | 0.569 | 5.56E-34 | 7 |
| BTN3A2.5     | 2.72E-38 | 0.532137194  | 0.475 | 0.253 | 6.24E-34 | 7 |
| CCNL1.6      | 3.29E-38 | 0.543973331  | 0.608 | 0.388 | 7.57E-34 | 7 |
| BLVRA        | 1.24E-37 | 0.508397362  | 0.303 | 0.135 | 2.85E-33 | 7 |
| KLF6.6       | 1.61E-37 | -1.257597871 | 0.504 | 0.656 | 3.70E-33 | 7 |
| TNFRSF1B.1   | 2.23E-37 | 0.603493689  | 0.42  | 0.224 | 5.13E-33 | 7 |
| NOP58        | 2.86E-37 | 0.640435428  | 0.329 | 0.154 | 6.57E-33 | 7 |
| USP34        | 4.69E-37 | 0.566568196  | 0.349 | 0.168 | 1.08E-32 | 7 |
| TERF1        | 1.57E-36 | 0.569127012  | 0.332 | 0.157 | 3.61E-32 | 7 |
| DDX39B       | 2.62E-36 | 0.597610629  | 0.282 | 0.123 | 6.02E-32 | 7 |
| IGFBP3.6     | 2.95E-36 | -2.474485347 | 0.039 | 0.254 | 6.78E-32 | 7 |
| ARL4C.3      | 3.52E-36 | 0.66637322   | 0.402 | 0.205 | 8.08E-32 | 7 |
| CD84.4       | 3.96E-36 | 0.571037556  | 0.434 | 0.23  | 9.09E-32 | 7 |
| IFNGR1.4     | 4.01E-36 | -1.114183837 | 0.05  | 0.269 | 9.21E-32 | 7 |
| ANKRD44.4    | 4.64E-36 | 0.628070358  | 0.448 | 0.249 | 1.07E-31 | 7 |
| PAFAH1B1     | 6.52E-36 | 0.555754301  | 0.347 | 0.172 | 1.50E-31 | 7 |
| PPP4R3A      | 8.04E-36 | 0.564099307  | 0.284 | 0.124 | 1.85E-31 | 7 |
| PSMA3-AS1.5  | 8.73E-36 | 0.533202708  | 0.472 | 0.265 | 2.01E-31 | 7 |
| HNRNPM       | 4.92E-35 | 0.517899596  | 0.511 | 0.309 | 1.13E-30 | 7 |
| SAMD9.1      | 5.48E-35 | 0.588665633  | 0.326 | 0.154 | 1.26E-30 | 7 |
| DSTN.5       | 9.28E-35 | -1.430104811 | 0.094 | 0.318 | 2.13E-30 | 7 |
| SNRPN        | 1.18E-34 | 0.541648806  | 0.408 | 0.219 | 2.72E-30 | 7 |
| TLN1.2       | 1.31E-34 | 0.544011653  | 0.451 | 0.256 | 3.01E-30 | 7 |
| RASA2.1      | 1.38E-34 | 0.508324325  | 0.287 | 0.125 | 3.16E-30 | 7 |
| S100A9.6     | 3.62E-34 | -2.736642713 | 0.052 | 0.261 | 8.31E-30 | 7 |
| MACF1.5      | 5.26E-34 | 0.563228886  | 0.445 | 0.248 | 1.21E-29 | 7 |
| KDM5A.1      | 7.07E-34 | 0.518633787  | 0.366 | 0.188 | 1.62E-29 | 7 |
| RBL2.1       | 7.25E-34 | 0.561199224  | 0.341 | 0.168 | 1.67E-29 | 7 |
| BAX.1        | 9.14E-34 | 0.538336549  | 0.498 | 0.299 | 2.10E-29 | 7 |
| G3BP2.1      | 1.18E-33 | 0.609330616  | 0.382 | 0.2   | 2.72E-29 | 7 |
| DNAJC1.1     | 1.91E-33 | 0.51371085   | 0.39  | 0.208 | 4.38E-29 | 7 |
| RPLP0.4      | 1.91E-33 | -0.805988548 | 0.904 | 0.84  | 4.38E-29 | 7 |
| RSRP1.5      | 5.29E-33 | 0.5084122    | 0.608 | 0.403 | 1.22E-28 | 7 |
| XRN1.1       | 5.83E-33 | 0.50595063   | 0.293 | 0.136 | 1.34E-28 | 7 |
| GNB2L1       | 6.61E-33 | -0.606284784 | 0.903 | 0.832 | 1.52E-28 | 7 |
| ARPC5L.4     | 8.49E-33 | 0.563394654  | 0.408 | 0.223 | 1.95E-28 | 7 |
| SMC5         | 1.42E-32 | 0.574032097  | 0.276 | 0.126 | 3.26E-28 | 7 |
| LBR          | 1.43E-32 | 0.519557845  | 0.31  | 0.148 | 3.30E-28 | 7 |
| CNTRL1       | 1.76E-32 | 0.586571991  | 0.316 | 0.154 | 4.05E-28 | 7 |
| TAP1.4       | 2.87E-32 | 0.506307642  | 0.428 | 0.238 | 6.59E-28 | 7 |
| NPC2.5       | 9.00E-32 | -1.715568999 | 0.199 | 0.388 | 2.07E-27 | 7 |
| CENPC        | 1.49E-31 | 0.500609566  | 0.3   | 0.141 | 3.42E-27 | 7 |
| ZC3H7A.1     | 1.77E-31 | 0.552936041  | 0.308 | 0.151 | 4.07E-27 | 7 |
| PDE7A        | 3.49E-31 | 0.525502769  | 0.261 | 0.115 | 8.03E-27 | 7 |
| RPS5.2       | 3.69E-31 | -0.667682759 | 0.906 | 0.838 | 8.48E-27 | 7 |
| GTF2I.1      | 7.14E-31 | 0.510144114  | 0.367 | 0.199 | 1.64E-26 | 7 |
| RHOB.5       | 8.99E-31 | -1.52866052  | 0.156 | 0.358 | 2.07E-26 | 7 |

|            |          |              |       |       |          |   |
|------------|----------|--------------|-------|-------|----------|---|
| RPS11.1    | 2.09E-30 | -0.523158186 | 0.939 | 0.851 | 4.81E-26 | 7 |
| PARVG.1    | 2.51E-30 | 0.523404436  | 0.314 | 0.159 | 5.77E-26 | 7 |
| EPC1.5     | 2.59E-30 | 0.50603079   | 0.449 | 0.261 | 5.96E-26 | 7 |
| PARP14.1   | 2.73E-30 | 0.570483005  | 0.364 | 0.197 | 6.27E-26 | 7 |
| PJA2       | 3.61E-30 | 0.516808616  | 0.311 | 0.158 | 8.29E-26 | 7 |
| MYCBP2.2   | 4.12E-30 | 0.559414659  | 0.425 | 0.25  | 9.46E-26 | 7 |
| RPL5.2     | 5.31E-30 | -0.565540463 | 0.939 | 0.848 | 1.22E-25 | 7 |
| BDP1       | 6.19E-30 | 0.558076181  | 0.344 | 0.181 | 1.42E-25 | 7 |
| HBA2.5     | 1.03E-29 | -3.616962876 | 0.064 | 0.26  | 2.38E-25 | 7 |
| DOCK2.1    | 1.47E-29 | 0.524559116  | 0.266 | 0.124 | 3.37E-25 | 7 |
| PSAP.7     | 4.45E-29 | -1.48996603  | 0.323 | 0.475 | 1.02E-24 | 7 |
| ZNF655     | 5.12E-29 | 0.501484306  | 0.282 | 0.137 | 1.18E-24 | 7 |
| ZNF292     | 5.77E-29 | 0.53475686   | 0.338 | 0.178 | 1.33E-24 | 7 |
| WAPL       | 1.25E-28 | 0.509061678  | 0.319 | 0.166 | 2.87E-24 | 7 |
| APOL6      | 1.53E-28 | 0.534122664  | 0.299 | 0.148 | 3.51E-24 | 7 |
| STAT3.4    | 2.59E-28 | 0.606291086  | 0.483 | 0.31  | 5.95E-24 | 7 |
| SRPRA      | 2.91E-28 | 0.524356339  | 0.278 | 0.135 | 6.68E-24 | 7 |
| GRN.6      | 3.09E-28 | -1.242227342 | 0.077 | 0.262 | 7.11E-24 | 7 |
| CTSB.6     | 4.68E-27 | -1.207206808 | 0.126 | 0.311 | 1.07E-22 | 7 |
| TMPO.1     | 9.23E-27 | 0.500084606  | 0.287 | 0.145 | 2.12E-22 | 7 |
| ANKRD11.1  | 1.18E-26 | 0.512802377  | 0.387 | 0.223 | 2.72E-22 | 7 |
| JUN.4      | 1.74E-26 | -1.201979573 | 0.631 | 0.695 | 4.00E-22 | 7 |
| SOD2.6     | 1.93E-26 | -1.582016952 | 0.115 | 0.302 | 4.44E-22 | 7 |
| WHSC1L1.4  | 2.60E-26 | 0.509627723  | 0.396 | 0.232 | 5.98E-22 | 7 |
| CEBPB.5    | 2.73E-26 | -1.130222359 | 0.144 | 0.338 | 6.28E-22 | 7 |
| SENP6      | 3.47E-26 | 0.517186068  | 0.282 | 0.144 | 7.96E-22 | 7 |
| GOLGB1     | 5.81E-26 | 0.563635154  | 0.367 | 0.215 | 1.34E-21 | 7 |
| DDIT4.4    | 7.12E-26 | -1.191219812 | 0.341 | 0.526 | 1.64E-21 | 7 |
| SETX       | 7.72E-26 | 0.512740553  | 0.272 | 0.138 | 1.77E-21 | 7 |
| HSPB1.6    | 1.15E-25 | -1.542956782 | 0.278 | 0.442 | 2.65E-21 | 7 |
| S100A11.6  | 1.73E-25 | -1.309575702 | 0.534 | 0.593 | 3.98E-21 | 7 |
| GPRIN3.2   | 2.52E-25 | 0.540104509  | 0.252 | 0.124 | 5.80E-21 | 7 |
| LDHA.6     | 1.17E-24 | -1.475255018 | 0.457 | 0.585 | 2.69E-20 | 7 |
| REST       | 3.08E-24 | 0.512321399  | 0.259 | 0.131 | 7.07E-20 | 7 |
| LGALS3.3   | 9.27E-24 | -0.968327497 | 0.082 | 0.254 | 2.13E-19 | 7 |
| RPL22.3    | 2.82E-23 | -0.582158671 | 0.886 | 0.807 | 6.48E-19 | 7 |
| FOSB.3     | 1.20E-22 | -0.920441671 | 0.255 | 0.434 | 2.75E-18 | 7 |
| PPP1R10.1  | 1.84E-22 | 0.510470406  | 0.308 | 0.175 | 4.23E-18 | 7 |
| GAPDH.5    | 1.59E-20 | -0.848861466 | 0.891 | 0.865 | 3.66E-16 | 7 |
| GLIPR1.4   | 6.91E-20 | -0.73045617  | 0.144 | 0.307 | 1.59E-15 | 7 |
| YBX1.3     | 1.98E-19 | -0.789835556 | 0.666 | 0.67  | 4.54E-15 | 7 |
| SAT1.6     | 2.30E-19 | -1.250252998 | 0.592 | 0.633 | 5.29E-15 | 7 |
| C10orf54.5 | 2.94E-19 | -0.791427296 | 0.135 | 0.289 | 6.77E-15 | 7 |
| PRDX2.4    | 5.47E-18 | -0.808183112 | 0.12  | 0.272 | 1.26E-13 | 7 |
| EEF2.1     | 6.21E-17 | -0.665035734 | 0.677 | 0.686 | 1.43E-12 | 7 |
| AIF1.7     | 1.23E-16 | -1.521488241 | 0.141 | 0.265 | 2.83E-12 | 7 |
| TOMM7.3    | 5.05E-16 | -0.555331364 | 0.809 | 0.752 | 1.16E-11 | 7 |
| ISG20.5    | 1.05E-15 | -0.739540938 | 0.226 | 0.368 | 2.42E-11 | 7 |
| ANXA2.3    | 1.13E-15 | -1.055320854 | 0.281 | 0.399 | 2.60E-11 | 7 |
| PIK3IP1.7  | 1.17E-15 | -0.804689003 | 0.232 | 0.364 | 2.68E-11 | 7 |
| RGCC.6     | 1.98E-15 | -1.263734231 | 0.179 | 0.313 | 4.56E-11 | 7 |
| S100A6.3   | 2.75E-15 | -0.874808225 | 0.819 | 0.764 | 6.33E-11 | 7 |
| HLA-DRA.7  | 1.21E-14 | -1.839368726 | 0.64  | 0.674 | 2.79E-10 | 7 |
| TAGLN2.5   | 2.19E-14 | -0.745686748 | 0.222 | 0.363 | 5.03E-10 | 7 |
| ZFAND5.5   | 2.87E-14 | -0.771855312 | 0.181 | 0.314 | 6.61E-10 | 7 |
| APLP2.5    | 8.93E-14 | -0.763122938 | 0.137 | 0.261 | 2.05E-09 | 7 |
| RNASET2.7  | 4.30E-13 | -1.033750984 | 0.264 | 0.366 | 9.87E-09 | 7 |
| EIF3E.3    | 2.91E-12 | -0.664790684 | 0.473 | 0.548 | 6.68E-08 | 7 |

|            |           |              |       |       |             |   |
|------------|-----------|--------------|-------|-------|-------------|---|
| RAC1.5     | 4.21E-12  | -0.893073095 | 0.384 | 0.451 | 9.67E-08    | 7 |
| CITED2.6   | 4.60E-12  | -0.754972903 | 0.155 | 0.273 | 1.06E-07    | 7 |
| HLA-DRB5.7 | 5.09E-12  | -0.510462454 | 0.561 | 0.364 | 1.17E-07    | 7 |
| GLTSCR2.3  | 5.76E-12  | -0.657602242 | 0.534 | 0.59  | 1.32E-07    | 7 |
| RTN4.5     | 1.26E-11  | -0.695954363 | 0.241 | 0.356 | 2.91E-07    | 7 |
| PPP1R15A.4 | 1.94E-11  | -0.652007392 | 0.287 | 0.409 | 4.46E-07    | 7 |
| TPI1.5     | 1.36E-10  | -0.957411904 | 0.527 | 0.566 | 3.13E-06    | 7 |
| FOXP1.2    | 2.01E-10  | -0.554839423 | 0.152 | 0.263 | 4.62E-06    | 7 |
| TUBB.5     | 2.80E-10  | -0.751744832 | 0.241 | 0.353 | 6.43E-06    | 7 |
| HSP90AA1.4 | 4.78E-10  | -0.944761577 | 0.678 | 0.653 | 1.10E-05    | 7 |
| TUBA1B.5   | 5.20E-10  | -0.896393128 | 0.332 | 0.418 | 1.19E-05    | 7 |
| CYTIP.5    | 8.48E-10  | -0.750517657 | 0.416 | 0.478 | 1.95E-05    | 7 |
| LAPTM4A.6  | 9.56E-10  | -0.760437966 | 0.253 | 0.357 | 2.20E-05    | 7 |
| YWHAH.5    | 1.57E-09  | -0.947436784 | 0.196 | 0.287 | 3.61E-05    | 7 |
| PPP1CB.4   | 3.31E-09  | -0.522558217 | 0.187 | 0.302 | 7.61E-05    | 7 |
| CD63.6     | 2.73E-08  | -0.867273517 | 0.514 | 0.52  | 0.000627428 | 7 |
| GDI2.6     | 3.69E-08  | -0.54872814  | 0.217 | 0.317 | 0.000849132 | 7 |
| ZFP36L2.6  | 2.94E-07  | -0.737118716 | 0.774 | 0.695 | 0.00676614  | 7 |
| GPX4.5     | 1.76E-06  | -0.660697117 | 0.414 | 0.456 | 0.040524165 | 7 |
| ESM1       | 0         | 4.036877744  | 0.693 | 0.099 | 0           | 8 |
| SPARCL1    | 0         | 3.443117763  | 0.718 | 0.139 | 0           | 8 |
| IGFBP7.8   | 4.62E-274 | 3.043237871  | 0.871 | 0.357 | 1.06E-269   | 8 |
| ENPP2      | 1.68E-257 | 3.548280277  | 0.543 | 0.107 | 3.86E-253   | 8 |
| SPARC      | 5.09E-247 | 3.104212383  | 0.638 | 0.162 | 1.17E-242   | 8 |
| GNG11      | 9.10E-214 | 3.318953156  | 0.529 | 0.127 | 2.09E-209   | 8 |
| PLVAP      | 1.06E-191 | 2.937208489  | 0.421 | 0.081 | 2.44E-187   | 8 |
| SLC9A3R2   | 1.17E-191 | 3.101070108  | 0.344 | 0.053 | 2.69E-187   | 8 |
| RAMP2      | 2.00E-179 | 2.832184474  | 0.337 | 0.054 | 4.59E-175   | 8 |
| CD59.2     | 5.49E-172 | 3.109774928  | 0.608 | 0.216 | 1.26E-167   | 8 |
| IFI27      | 1.98E-148 | 2.970184009  | 0.482 | 0.14  | 4.55E-144   | 8 |
| SDPR       | 3.40E-147 | 2.785642917  | 0.344 | 0.068 | 7.82E-143   | 8 |
| RBP7       | 3.10E-143 | 3.269496331  | 0.341 | 0.069 | 7.12E-139   | 8 |
| IFITM3.8   | 5.78E-139 | 2.679718531  | 0.693 | 0.364 | 1.33E-134   | 8 |
| IGFBP3.7   | 1.07E-136 | 2.995807378  | 0.583 | 0.229 | 2.46E-132   | 8 |
| PTPRC.8    | 1.37E-127 | -2.018734489 | 0.068 | 0.641 | 3.14E-123   | 8 |
| CLEC14A    | 1.39E-125 | 2.439074948  | 0.27  | 0.048 | 3.20E-121   | 8 |
| PLPP1      | 4.86E-123 | 2.683011207  | 0.356 | 0.086 | 1.12E-118   | 8 |
| CXCR4.6    | 5.78E-117 | -1.713337719 | 0.244 | 0.799 | 1.33E-112   | 8 |
| ZFP36L2.7  | 2.14E-116 | -1.837575178 | 0.157 | 0.723 | 4.92E-112   | 8 |
| ADGRL4     | 6.66E-112 | 2.303995807  | 0.255 | 0.047 | 1.53E-107   | 8 |
| RGS1.8     | 3.21E-111 | -1.866557915 | 0.179 | 0.72  | 7.38E-107   | 8 |
| PRSS23     | 1.26E-109 | 2.692577075  | 0.371 | 0.103 | 2.89E-105   | 8 |
| FLT1       | 2.20E-106 | 2.189679117  | 0.287 | 0.061 | 5.05E-102   | 8 |
| MT-CO1.3   | 2.74E-106 | -1.085452758 | 0.629 | 0.939 | 6.29E-102   | 8 |
| RNASE1     | 5.32E-105 | 2.612786464  | 0.326 | 0.082 | 1.22E-100   | 8 |
| TIMP3      | 9.93E-99  | 2.366769911  | 0.324 | 0.084 | 2.28E-94    | 8 |
| CORO1A.6   | 1.48E-96  | -1.404867103 | 0.083 | 0.586 | 3.40E-92    | 8 |
| LAPTM5.6   | 2.51E-96  | -1.350751614 | 0.083 | 0.589 | 5.78E-92    | 8 |
| HCST.6     | 3.41E-96  | -1.451720515 | 0.072 | 0.565 | 7.83E-92    | 8 |
| CCL5.7     | 3.10E-95  | -2.152418524 | 0.1   | 0.582 | 7.12E-91    | 8 |
| TSC22D1    | 7.49E-94  | 2.83900456   | 0.442 | 0.172 | 1.72E-89    | 8 |
| MGP        | 2.91E-92  | 2.379158202  | 0.409 | 0.139 | 6.68E-88    | 8 |
| CYBA.4     | 2.19E-91  | -1.036448121 | 0.175 | 0.71  | 5.04E-87    | 8 |
| EVL.7      | 1.47E-90  | -1.452914169 | 0.052 | 0.515 | 3.38E-86    | 8 |
| CD44.4     | 7.98E-90  | -1.498502879 | 0.052 | 0.511 | 1.83E-85    | 8 |
| CD52.5     | 3.16E-89  | -1.68403242  | 0.097 | 0.569 | 7.26E-85    | 8 |
| BTG1.7     | 3.24E-88  | -1.271816442 | 0.401 | 0.862 | 7.45E-84    | 8 |
| FYB.6      | 5.07E-88  | -1.665355927 | 0.035 | 0.479 | 1.17E-83    | 8 |

|                |          |              |       |       |          |   |
|----------------|----------|--------------|-------|-------|----------|---|
| PABPC1.3       | 6.69E-88 | -0.895000095 | 0.162 | 0.685 | 1.54E-83 | 8 |
| CD69.8         | 1.12E-84 | -1.953584937 | 0.093 | 0.548 | 2.57E-80 | 8 |
| SRSF7.6        | 1.12E-84 | -1.306422092 | 0.095 | 0.565 | 2.58E-80 | 8 |
| CD37.5         | 4.80E-84 | -1.34971087  | 0.042 | 0.482 | 1.10E-79 | 8 |
| STK4.5         | 3.97E-82 | -1.478155026 | 0.057 | 0.491 | 9.12E-78 | 8 |
| RPS29.5        | 8.49E-80 | -0.906574037 | 0.634 | 0.934 | 1.95E-75 | 8 |
| RPL17.6        | 1.03E-79 | -0.988550796 | 0.134 | 0.614 | 2.37E-75 | 8 |
| SPRY1          | 1.02E-78 | 2.507906943  | 0.322 | 0.102 | 2.35E-74 | 8 |
| S100A4.6       | 2.21E-77 | -1.180171433 | 0.235 | 0.72  | 5.08E-73 | 8 |
| LSP1.7         | 2.26E-77 | -1.447682186 | 0.042 | 0.452 | 5.19E-73 | 8 |
| CD53.4         | 3.90E-77 | -1.09388551  | 0.062 | 0.489 | 8.96E-73 | 8 |
| CD2.7          | 6.56E-77 | -1.82941191  | 0.063 | 0.474 | 1.51E-72 | 8 |
| CELF2.6        | 5.03E-76 | -1.382456684 | 0.038 | 0.443 | 1.16E-71 | 8 |
| SRSF5.5        | 5.27E-76 | -0.730511295 | 0.155 | 0.643 | 1.21E-71 | 8 |
| RPS27.4        | 1.82E-74 | -0.719405933 | 0.885 | 0.979 | 4.19E-70 | 8 |
| ITGB2.6        | 4.26E-74 | -1.451527454 | 0.037 | 0.432 | 9.79E-70 | 8 |
| PNISR.6        | 1.52E-73 | -0.858436682 | 0.088 | 0.529 | 3.49E-69 | 8 |
| CYTIP.6        | 7.92E-73 | -1.100938421 | 0.075 | 0.493 | 1.82E-68 | 8 |
| KLF6.7         | 8.15E-73 | -1.031500673 | 0.197 | 0.669 | 1.87E-68 | 8 |
| SLA.7          | 8.67E-73 | -1.460081105 | 0.028 | 0.416 | 1.99E-68 | 8 |
| TNFAIP3.8      | 4.93E-72 | -1.415992805 | 0.06  | 0.464 | 1.13E-67 | 8 |
| RGCC.7         | 4.90E-71 | 2.674230875  | 0.519 | 0.298 | 1.13E-66 | 8 |
| CRIP2          | 1.19E-70 | 2.406272617  | 0.295 | 0.094 | 2.74E-66 | 8 |
| SARAF.3        | 5.69E-70 | -0.57885673  | 0.2   | 0.699 | 1.31E-65 | 8 |
| TRAC.8         | 3.34E-69 | -1.720574945 | 0.06  | 0.449 | 7.68E-65 | 8 |
| OAZ1.5         | 1.03E-68 | -0.674515811 | 0.25  | 0.757 | 2.37E-64 | 8 |
| RARRES3.7      | 1.19E-68 | -1.265327351 | 0.043 | 0.427 | 2.74E-64 | 8 |
| LCP1.7         | 2.94E-68 | -1.146966952 | 0.042 | 0.42  | 6.75E-64 | 8 |
| HMGB2.4        | 2.95E-68 | -0.770433853 | 0.082 | 0.494 | 6.79E-64 | 8 |
| GSN.2          | 4.30E-68 | 2.451995363  | 0.446 | 0.215 | 9.89E-64 | 8 |
| STK17B.4       | 7.18E-68 | -1.164160581 | 0.038 | 0.417 | 1.65E-63 | 8 |
| CD3D.8         | 1.10E-67 | -1.312218109 | 0.09  | 0.492 | 2.53E-63 | 8 |
| GZMA.7         | 1.47E-67 | -1.73074771  | 0.055 | 0.435 | 3.38E-63 | 8 |
| MT-ND5.6       | 2.82E-66 | -0.646417135 | 0.165 | 0.63  | 6.48E-62 | 8 |
| RPSA.3         | 3.17E-66 | -0.809152262 | 0.322 | 0.826 | 7.28E-62 | 8 |
| NKG7.8         | 9.11E-66 | -2.156374026 | 0.068 | 0.443 | 2.09E-61 | 8 |
| JUN.5          | 1.08E-65 | -1.076499629 | 0.252 | 0.711 | 2.48E-61 | 8 |
| HES1           | 1.10E-65 | 2.581980869  | 0.26  | 0.077 | 2.53E-61 | 8 |
| CST7.7         | 1.20E-65 | -1.800454322 | 0.04  | 0.405 | 2.77E-61 | 8 |
| GPSM3.5        | 5.22E-65 | -0.911563099 | 0.038 | 0.406 | 1.20E-60 | 8 |
| DUSP2.7        | 5.27E-65 | -1.54606327  | 0.065 | 0.448 | 1.21E-60 | 8 |
| PNRC1.3        | 5.73E-65 | -0.614168001 | 0.18  | 0.655 | 1.32E-60 | 8 |
| NBEAL1.2       | 8.23E-65 | -0.560226241 | 0.174 | 0.635 | 1.89E-60 | 8 |
| CD3E.7         | 2.62E-64 | -1.371481241 | 0.047 | 0.413 | 6.02E-60 | 8 |
| AC090498.1.5   | 4.17E-64 | -0.923196667 | 0.109 | 0.518 | 9.58E-60 | 8 |
| ELF1.6         | 1.34E-63 | -0.70961208  | 0.068 | 0.457 | 3.07E-59 | 8 |
| CD48.7         | 3.14E-63 | -1.075021017 | 0.035 | 0.39  | 7.22E-59 | 8 |
| MCL1.4         | 3.87E-63 | -0.549074287 | 0.114 | 0.532 | 8.89E-59 | 8 |
| IDS.5          | 2.10E-62 | -1.191210127 | 0.033 | 0.388 | 4.84E-58 | 8 |
| DNAJB1.6       | 2.35E-62 | -1.304052673 | 0.065 | 0.436 | 5.40E-58 | 8 |
| RPL41.5        | 1.31E-61 | -0.612645606 | 0.838 | 0.982 | 3.02E-57 | 8 |
| ID3            | 1.33E-61 | 2.323456051  | 0.339 | 0.131 | 3.06E-57 | 8 |
| PRRC2C.5       | 1.65E-61 | -0.770977769 | 0.068 | 0.45  | 3.79E-57 | 8 |
| CCL4.8         | 1.94E-61 | -2.220421869 | 0.088 | 0.456 | 4.45E-57 | 8 |
| EPAS1          | 2.50E-61 | 2.163815638  | 0.304 | 0.107 | 5.74E-57 | 8 |
| IL2RG.8        | 2.61E-61 | -1.275779408 | 0.037 | 0.387 | 6.01E-57 | 8 |
| EEF1B2.2       | 2.83E-61 | -0.591629858 | 0.209 | 0.682 | 6.51E-57 | 8 |
| RP11-347P5.1.7 | 7.84E-61 | -1.513089219 | 0.042 | 0.39  | 1.80E-56 | 8 |

|            |          |              |       |       |          |   |
|------------|----------|--------------|-------|-------|----------|---|
| MT-CO3.4   | 2.11E-60 | -0.756524338 | 0.508 | 0.896 | 4.85E-56 | 8 |
| TRBC2.7    | 3.02E-60 | -1.492720788 | 0.043 | 0.392 | 6.95E-56 | 8 |
| RNF213.6   | 4.35E-60 | -1.083706993 | 0.047 | 0.402 | 9.99E-56 | 8 |
| RAC2.8     | 4.46E-60 | -1.094160545 | 0.04  | 0.387 | 1.03E-55 | 8 |
| CAV1.1     | 6.38E-60 | 2.335328308  | 0.332 | 0.129 | 1.47E-55 | 8 |
| MT-ND2.4   | 1.41E-59 | -0.68734593  | 0.442 | 0.885 | 3.24E-55 | 8 |
| HSP90AA1.5 | 2.81E-59 | -0.732682947 | 0.215 | 0.673 | 6.47E-55 | 8 |
| LITAF.5    | 3.97E-59 | -1.076429955 | 0.037 | 0.382 | 9.12E-55 | 8 |
| PPDPF.4    | 1.97E-58 | -0.544162642 | 0.21  | 0.679 | 4.54E-54 | 8 |
| UCP2.6     | 2.24E-58 | -1.130092778 | 0.028 | 0.361 | 5.14E-54 | 8 |
| ZFAS1.6    | 2.51E-58 | -0.723685672 | 0.109 | 0.501 | 5.76E-54 | 8 |
| MT-ND3.6   | 2.54E-58 | -0.726572434 | 0.402 | 0.849 | 5.85E-54 | 8 |
| ACAP1.8    | 1.15E-57 | -1.387815573 | 0.023 | 0.347 | 2.64E-53 | 8 |
| YWHAZ.6    | 1.76E-57 | -0.554713548 | 0.114 | 0.511 | 4.04E-53 | 8 |
| AKAP13.7   | 2.68E-57 | -0.645440707 | 0.078 | 0.448 | 6.15E-53 | 8 |
| FKBP1A.6   | 3.88E-57 | 2.481684523  | 0.551 | 0.407 | 8.91E-53 | 8 |
| EVI2B.3    | 6.51E-57 | -1.15362812  | 0.025 | 0.349 | 1.50E-52 | 8 |
| AAK1.8     | 1.92E-56 | -1.032455189 | 0.047 | 0.385 | 4.42E-52 | 8 |
| FNBP1.7    | 4.23E-56 | -0.847878915 | 0.047 | 0.382 | 9.72E-52 | 8 |
| WIPF1.8    | 7.88E-56 | -1.095458382 | 0.032 | 0.357 | 1.81E-51 | 8 |
| RPS21.4    | 8.95E-56 | -0.710712883 | 0.409 | 0.882 | 2.06E-51 | 8 |
| EMP3.3     | 1.97E-55 | -0.77102223  | 0.057 | 0.405 | 4.52E-51 | 8 |
| FAM49B.3   | 4.02E-55 | -1.013613314 | 0.032 | 0.354 | 9.25E-51 | 8 |
| SNHG8.3    | 4.50E-55 | -0.735912108 | 0.083 | 0.45  | 1.03E-50 | 8 |
| RSRP1.6    | 5.47E-55 | -0.816749003 | 0.073 | 0.428 | 1.26E-50 | 8 |
| GZMK.8     | 5.76E-55 | -2.031257246 | 0.052 | 0.379 | 1.32E-50 | 8 |
| CIB1       | 1.61E-54 | -0.683190333 | 0.06  | 0.402 | 3.69E-50 | 8 |
| ZFP36.5    | 2.00E-54 | -0.776990881 | 0.25  | 0.682 | 4.59E-50 | 8 |
| ALOX5AP.5  | 5.73E-54 | -1.530411553 | 0.03  | 0.342 | 1.32E-49 | 8 |
| PPP1R15A.5 | 1.70E-53 | -0.924457375 | 0.072 | 0.418 | 3.90E-49 | 8 |
| RNASET2.8  | 2.02E-53 | -1.219732804 | 0.048 | 0.375 | 4.64E-49 | 8 |
| CCNL1.7    | 2.95E-53 | -0.661456376 | 0.068 | 0.414 | 6.78E-49 | 8 |
| POLR2J3.5  | 2.98E-53 | -0.715825972 | 0.065 | 0.409 | 6.85E-49 | 8 |
| STK17A.7   | 3.14E-53 | -1.010990977 | 0.053 | 0.38  | 7.21E-49 | 8 |
| NFKBIA.6   | 3.24E-53 | -0.61899441  | 0.165 | 0.575 | 7.45E-49 | 8 |
| INSR.1     | 6.66E-53 | 2.405123685  | 0.319 | 0.129 | 1.53E-48 | 8 |
| CNN3       | 7.84E-53 | 2.270478837  | 0.277 | 0.1   | 1.80E-48 | 8 |
| FOS.6      | 8.10E-53 | -0.958943419 | 0.285 | 0.699 | 1.86E-48 | 8 |
| RGS2.7     | 8.79E-53 | -1.346251167 | 0.032 | 0.349 | 2.02E-48 | 8 |
| MT-ND1.3   | 1.82E-52 | -0.641162348 | 0.342 | 0.807 | 4.19E-48 | 8 |
| PIK3IP1.8  | 2.03E-52 | -0.955355574 | 0.047 | 0.372 | 4.67E-48 | 8 |
| PPP2R5C.6  | 2.95E-52 | -0.990882615 | 0.07  | 0.404 | 6.77E-48 | 8 |
| COTL1.3    | 5.98E-52 | -0.844346107 | 0.097 | 0.449 | 1.37E-47 | 8 |
| BTG2.5     | 9.97E-52 | -0.943151941 | 0.048 | 0.371 | 2.29E-47 | 8 |
| RBM25.5    | 1.07E-51 | -0.745440138 | 0.05  | 0.373 | 2.46E-47 | 8 |
| HNRNPA1.2  | 1.65E-51 | -0.513871191 | 0.309 | 0.798 | 3.78E-47 | 8 |
| LIMD2.7    | 1.74E-51 | -1.136933786 | 0.023 | 0.323 | 4.00E-47 | 8 |
| ADGRE5.7   | 5.87E-51 | -1.229223798 | 0.018 | 0.312 | 1.35E-46 | 8 |
| RPS2.4     | 9.43E-51 | -0.587368376 | 0.661 | 0.957 | 2.17E-46 | 8 |
| IL32.8     | 1.88E-50 | -0.868108498 | 0.207 | 0.594 | 4.33E-46 | 8 |
| CTSS.6     | 4.44E-50 | -1.150600398 | 0.057 | 0.376 | 1.02E-45 | 8 |
| FOSB.4     | 5.95E-50 | -0.788793289 | 0.097 | 0.44  | 1.37E-45 | 8 |
| ARF6.4     | 6.23E-50 | -0.707396173 | 0.065 | 0.393 | 1.43E-45 | 8 |
| REL.4      | 6.77E-50 | -0.976367412 | 0.033 | 0.335 | 1.56E-45 | 8 |
| JUNB.7     | 1.86E-49 | -0.802550504 | 0.332 | 0.741 | 4.28E-45 | 8 |
| KIAA1551.6 | 2.05E-49 | -0.969241159 | 0.042 | 0.349 | 4.70E-45 | 8 |
| SAMSN1.3   | 2.17E-49 | -1.034215421 | 0.035 | 0.335 | 4.99E-45 | 8 |
| RPS15A.4   | 2.71E-49 | -0.585476089 | 0.681 | 0.945 | 6.23E-45 | 8 |

|            |          |              |       |       |          |   |
|------------|----------|--------------|-------|-------|----------|---|
| PIK3R1.5   | 3.37E-49 | -1.113614017 | 0.027 | 0.321 | 7.74E-45 | 8 |
| DEK.2      | 1.46E-48 | -0.621161878 | 0.06  | 0.378 | 3.36E-44 | 8 |
| RPL36A.4   | 1.99E-48 | -0.532859863 | 0.344 | 0.822 | 4.56E-44 | 8 |
| TRBC1.7    | 4.82E-48 | -1.467047087 | 0.06  | 0.366 | 1.11E-43 | 8 |
| MT-ND4L.4  | 1.33E-47 | -0.616016582 | 0.058 | 0.374 | 3.05E-43 | 8 |
| STAT3.5    | 4.36E-47 | -0.825087654 | 0.035 | 0.331 | 1.00E-42 | 8 |
| TAF7.5     | 1.31E-46 | -0.718196761 | 0.04  | 0.333 | 3.00E-42 | 8 |
| SH3KBP1.6  | 1.48E-46 | -0.682764665 | 0.033 | 0.32  | 3.40E-42 | 8 |
| RBMX.2     | 1.56E-46 | -0.5319371   | 0.073 | 0.393 | 3.58E-42 | 8 |
| CD7.5      | 2.15E-46 | -1.245500434 | 0.028 | 0.312 | 4.94E-42 | 8 |
| CLEC2D.7   | 2.78E-46 | -1.153491691 | 0.035 | 0.318 | 6.39E-42 | 8 |
| RGS10.4    | 8.27E-46 | -1.053027765 | 0.028 | 0.307 | 1.90E-41 | 8 |
| TAF1D.2    | 1.04E-45 | -0.859651078 | 0.042 | 0.331 | 2.39E-41 | 8 |
| RPL28.5    | 1.42E-45 | -0.54083958  | 0.684 | 0.944 | 3.26E-41 | 8 |
| MT-CYB.5   | 1.55E-45 | -0.593775415 | 0.387 | 0.823 | 3.56E-41 | 8 |
| NR4A2.5    | 2.28E-45 | -1.279736545 | 0.02  | 0.288 | 5.23E-41 | 8 |
| ROCK1.3    | 3.00E-45 | -0.601001958 | 0.048 | 0.344 | 6.90E-41 | 8 |
| RBPJ.4     | 5.01E-45 | -0.71896785  | 0.043 | 0.334 | 1.15E-40 | 8 |
| GLIPR1.5   | 5.71E-45 | -0.827959023 | 0.032 | 0.311 | 1.31E-40 | 8 |
| CTSC.6     | 8.55E-45 | -0.648509132 | 0.06  | 0.359 | 1.96E-40 | 8 |
| CRIP1.6    | 8.73E-45 | -1.22566402  | 0.03  | 0.305 | 2.01E-40 | 8 |
| SYTL3.7    | 9.54E-45 | -1.177776828 | 0.02  | 0.288 | 2.19E-40 | 8 |
| HCLS1.3    | 1.07E-44 | -0.697925643 | 0.047 | 0.335 | 2.46E-40 | 8 |
| SMAP2.4    | 1.22E-44 | -0.875867305 | 0.032 | 0.31  | 2.80E-40 | 8 |
| DOCK8.6    | 1.28E-44 | -0.929626072 | 0.03  | 0.303 | 2.94E-40 | 8 |
| HSPE1.4    | 1.41E-44 | -0.534265025 | 0.083 | 0.397 | 3.25E-40 | 8 |
| EVI2A.4    | 1.59E-44 | -0.813085896 | 0.02  | 0.292 | 3.65E-40 | 8 |
| CD3G.7     | 3.13E-44 | -1.221880315 | 0.033 | 0.305 | 7.19E-40 | 8 |
| LTB.7      | 5.57E-44 | -1.454369021 | 0.038 | 0.313 | 1.28E-39 | 8 |
| SRRM2.3    | 6.72E-44 | -0.550382605 | 0.055 | 0.354 | 1.54E-39 | 8 |
| APOBEC3G.6 | 1.04E-43 | -1.189892201 | 0.02  | 0.283 | 2.38E-39 | 8 |
| BCLAF1.5   | 1.40E-43 | -0.502998904 | 0.055 | 0.348 | 3.23E-39 | 8 |
| ARID4B.7   | 1.51E-43 | -0.663639263 | 0.06  | 0.353 | 3.48E-39 | 8 |
| MT-ND4.3   | 9.48E-43 | -0.559453692 | 0.503 | 0.891 | 2.18E-38 | 8 |
| VMP1.5     | 1.15E-42 | -0.784922246 | 0.05  | 0.332 | 2.65E-38 | 8 |
| TRAF3IP3.8 | 1.71E-42 | -1.01413794  | 0.013 | 0.267 | 3.94E-38 | 8 |
| GLUL.6     | 2.74E-42 | -0.899129217 | 0.042 | 0.318 | 6.30E-38 | 8 |
| BIRC3.6    | 7.74E-42 | -1.262379268 | 0.025 | 0.283 | 1.78E-37 | 8 |
| LCK.8      | 1.40E-41 | -0.852163776 | 0.035 | 0.299 | 3.21E-37 | 8 |
| ANXA1.8    | 1.75E-41 | -0.724905082 | 0.15  | 0.486 | 4.02E-37 | 8 |
| H3F3B.4    | 2.05E-41 | -0.544676761 | 0.397 | 0.854 | 4.72E-37 | 8 |
| EIF3A.4    | 4.03E-41 | -0.59102107  | 0.04  | 0.31  | 9.26E-37 | 8 |
| EZR.2      | 8.89E-41 | -0.540539235 | 0.055 | 0.337 | 2.04E-36 | 8 |
| TYROBP.8   | 9.68E-41 | -1.309411632 | 0.11  | 0.4   | 2.22E-36 | 8 |
| MYO1F.4    | 1.35E-40 | -0.796632766 | 0.027 | 0.282 | 3.10E-36 | 8 |
| GLRX.3     | 1.54E-40 | -0.625108641 | 0.042 | 0.309 | 3.55E-36 | 8 |
| ZEB2.4     | 1.57E-40 | -1.027561889 | 0.008 | 0.251 | 3.60E-36 | 8 |
| HLA-DQB1.6 | 2.22E-40 | -1.019908407 | 0.105 | 0.405 | 5.10E-36 | 8 |
| MT2A.8     | 2.49E-40 | -1.142094677 | 0.289 | 0.676 | 5.72E-36 | 8 |
| RPL10A.5   | 2.58E-40 | -0.511072755 | 0.447 | 0.884 | 5.93E-36 | 8 |
| PCSK7.7    | 4.99E-40 | -0.796836496 | 0.058 | 0.332 | 1.15E-35 | 8 |
| SERPINA1.7 | 5.11E-40 | -1.375181013 | 0.032 | 0.289 | 1.17E-35 | 8 |
| USP15.2    | 8.64E-40 | -0.785684083 | 0.023 | 0.273 | 1.99E-35 | 8 |
| TYMP.6     | 2.05E-39 | -0.684224191 | 0.043 | 0.307 | 4.71E-35 | 8 |
| SEPT6.5    | 2.46E-39 | -0.667697059 | 0.033 | 0.288 | 5.65E-35 | 8 |
| RPL23A.5   | 2.77E-39 | -0.533886383 | 0.688 | 0.941 | 6.36E-35 | 8 |
| EMB.6      | 6.04E-39 | -0.707432467 | 0.03  | 0.28  | 1.39E-34 | 8 |
| IKZF1.8    | 8.50E-39 | -0.927699938 | 0.017 | 0.254 | 1.95E-34 | 8 |

|             |          |              |       |       |          |   |
|-------------|----------|--------------|-------|-------|----------|---|
| CD27.7      | 9.17E-39 | -1.32498442  | 0.032 | 0.278 | 2.11E-34 | 8 |
| SMCHD1.3    | 1.32E-38 | -0.548330322 | 0.065 | 0.339 | 3.04E-34 | 8 |
| IL7R.6      | 1.47E-38 | -1.500313841 | 0.055 | 0.314 | 3.38E-34 | 8 |
| PLP2.4      | 1.71E-38 | -0.56826414  | 0.045 | 0.306 | 3.93E-34 | 8 |
| DHRS7.3     | 2.52E-38 | -0.531728476 | 0.033 | 0.286 | 5.80E-34 | 8 |
| HLA-DQA1.5  | 2.60E-38 | -1.279555339 | 0.083 | 0.355 | 5.97E-34 | 8 |
| CD96.8      | 2.81E-38 | -0.946579165 | 0.02  | 0.259 | 6.47E-34 | 8 |
| RNF149.5    | 2.90E-38 | -0.624527035 | 0.032 | 0.28  | 6.66E-34 | 8 |
| ATM.4       | 1.15E-37 | -0.856308292 | 0.022 | 0.259 | 2.63E-33 | 8 |
| HLA-DPB1.7  | 1.63E-37 | -1.067543629 | 0.289 | 0.648 | 3.75E-33 | 8 |
| CD247.7     | 2.45E-37 | -0.979247548 | 0.018 | 0.251 | 5.63E-33 | 8 |
| CEBPB.6     | 7.84E-37 | -0.615279031 | 0.07  | 0.34  | 1.80E-32 | 8 |
| ANKRD44.5   | 8.66E-37 | -0.78433694  | 0.03  | 0.268 | 1.99E-32 | 8 |
| AKNA.6      | 1.39E-36 | -0.782566791 | 0.033 | 0.271 | 3.19E-32 | 8 |
| TXNIP.7     | 1.92E-36 | -0.602509477 | 0.411 | 0.779 | 4.41E-32 | 8 |
| IL10RA.5    | 2.93E-36 | -0.745906596 | 0.032 | 0.269 | 6.74E-32 | 8 |
| BIN2.6      | 4.09E-36 | -0.769700685 | 0.027 | 0.259 | 9.40E-32 | 8 |
| BBX.3       | 6.00E-36 | -0.729061494 | 0.023 | 0.254 | 1.38E-31 | 8 |
| HSPD1.5     | 6.96E-36 | -0.579447082 | 0.053 | 0.304 | 1.60E-31 | 8 |
| MYCBP2.3    | 7.15E-36 | -0.62579211  | 0.032 | 0.268 | 1.64E-31 | 8 |
| PRDM1.5     | 8.62E-36 | -0.631533607 | 0.052 | 0.302 | 1.98E-31 | 8 |
| TRIM22.4    | 1.05E-35 | -0.583152586 | 0.027 | 0.258 | 2.41E-31 | 8 |
| RCSD1.6     | 1.23E-35 | -0.577788993 | 0.027 | 0.259 | 2.83E-31 | 8 |
| CCNH.6      | 1.52E-35 | -0.572867036 | 0.048 | 0.295 | 3.49E-31 | 8 |
| CMC1.7      | 1.65E-35 | -1.258113436 | 0.052 | 0.295 | 3.79E-31 | 8 |
| FCER1G.8    | 2.46E-35 | -1.139438504 | 0.063 | 0.314 | 5.66E-31 | 8 |
| MGEA5.6     | 2.78E-35 | -0.604696771 | 0.037 | 0.276 | 6.38E-31 | 8 |
| CHCHD10.6   | 3.01E-35 | -0.50196627  | 0.025 | 0.256 | 6.91E-31 | 8 |
| RNF19A.7    | 3.69E-35 | -0.708953768 | 0.047 | 0.287 | 8.49E-31 | 8 |
| ARID5B.3    | 8.21E-35 | -0.856672418 | 0.033 | 0.265 | 1.89E-30 | 8 |
| PSMA3-AS1.6 | 8.49E-35 | -0.633703166 | 0.043 | 0.285 | 1.95E-30 | 8 |
| HLA-DPA1.8  | 1.68E-34 | -0.976163216 | 0.25  | 0.585 | 3.86E-30 | 8 |
| RPS8.4      | 1.94E-34 | -0.511385946 | 0.586 | 0.933 | 4.46E-30 | 8 |
| TUBA4A.6    | 2.71E-34 | -0.831985316 | 0.047 | 0.283 | 6.23E-30 | 8 |
| LDHA.7      | 4.06E-34 | -0.510100111 | 0.239 | 0.594 | 9.33E-30 | 8 |
| PTMA.2      | 2.85E-33 | 0.75082223   | 0.825 | 0.921 | 6.56E-29 | 8 |
| PYCARD.4    | 4.79E-33 | -0.532374615 | 0.033 | 0.256 | 1.10E-28 | 8 |
| ANXA6.6     | 5.27E-33 | -0.512881788 | 0.035 | 0.259 | 1.21E-28 | 8 |
| GBP2.2      | 9.06E-33 | -0.52942971  | 0.043 | 0.272 | 2.08E-28 | 8 |
| TSTD1.3     | 1.81E-32 | -0.625980796 | 0.035 | 0.256 | 4.15E-28 | 8 |
| OCIAD2.5    | 1.79E-31 | -0.647698272 | 0.047 | 0.27  | 4.10E-27 | 8 |
| FOXP1.3     | 2.73E-31 | -0.585321581 | 0.043 | 0.267 | 6.28E-27 | 8 |
| MT1X.4      | 4.08E-31 | -1.829635403 | 0.063 | 0.293 | 9.37E-27 | 8 |
| LYZ.7       | 2.06E-30 | -1.573269109 | 0.117 | 0.362 | 4.73E-26 | 8 |
| CITED2.7    | 3.11E-30 | -0.73893603  | 0.057 | 0.277 | 7.14E-26 | 8 |
| YWHAH.6     | 2.29E-29 | 2.305196211  | 0.397 | 0.278 | 5.26E-25 | 8 |
| PECAM1.1    | 5.85E-29 | 2.141009557  | 0.331 | 0.195 | 1.34E-24 | 8 |
| APP.1       | 3.91E-27 | 2.174387713  | 0.304 | 0.173 | 8.98E-23 | 8 |
| AIF1.8      | 4.05E-27 | -0.993050425 | 0.062 | 0.268 | 9.31E-23 | 8 |
| NNMT.8      | 8.49E-27 | -1.101818729 | 0.088 | 0.309 | 1.95E-22 | 8 |
| SEPW1.8     | 1.85E-26 | 2.188150463  | 0.437 | 0.356 | 4.26E-22 | 8 |
| CRYAB.8     | 2.11E-26 | -1.171438834 | 0.063 | 0.268 | 4.84E-22 | 8 |
| VIM.6       | 8.14E-25 | 0.902921101  | 0.701 | 0.774 | 1.87E-20 | 8 |
| NDUFA4L2.8  | 9.18E-25 | -1.336631418 | 0.093 | 0.297 | 2.11E-20 | 8 |
| HBB.4       | 1.69E-24 | -1.306286441 | 0.149 | 0.402 | 3.87E-20 | 8 |
| SOD2.7      | 1.29E-22 | -0.519360874 | 0.097 | 0.302 | 2.96E-18 | 8 |
| PSMA1.1     | 3.53E-21 | 0.503413508  | 0.122 | 0.349 | 8.11E-17 | 8 |
| GNLY.8      | 8.69E-21 | -1.625685742 | 0.083 | 0.26  | 2.00E-16 | 8 |



|            |          |              |       |       |          |   |
|------------|----------|--------------|-------|-------|----------|---|
| COX7A2.1   | 7.88E-20 | 0.532203025  | 0.25  | 0.575 | 1.81E-15 | 8 |
| C9orf16.1  | 1.05E-19 | 0.555451003  | 0.134 | 0.359 | 2.42E-15 | 8 |
| TPM3.2     | 3.65E-19 | 0.514519299  | 0.195 | 0.465 | 8.39E-15 | 8 |
| EIF2S2     | 9.98E-19 | 0.523042878  | 0.115 | 0.319 | 2.29E-14 | 8 |
| HBA2.6     | 1.13E-18 | -1.670572839 | 0.083 | 0.258 | 2.59E-14 | 8 |
| APOC1.6    | 1.25E-18 | -0.760102482 | 0.109 | 0.291 | 2.86E-14 | 8 |
| ATP6V1F.6  | 1.93E-18 | 0.512288407  | 0.14  | 0.359 | 4.44E-14 | 8 |
| SNRPB2.1   | 5.10E-18 | 0.794987582  | 0.135 | 0.349 | 1.17E-13 | 8 |
| S100A9.7   | 1.65E-17 | -1.431368419 | 0.09  | 0.258 | 3.79E-13 | 8 |
| AP2M1      | 3.26E-17 | 0.503513574  | 0.129 | 0.332 | 7.48E-13 | 8 |
| NDUFB10.4  | 7.10E-17 | 0.553522695  | 0.142 | 0.353 | 1.63E-12 | 8 |
| C1QA.8     | 7.44E-17 | -0.673773944 | 0.095 | 0.257 | 1.71E-12 | 8 |
| PSMB3.3    | 8.26E-17 | 0.517792709  | 0.147 | 0.358 | 1.90E-12 | 8 |
| ERH.1      | 1.10E-16 | 0.531839941  | 0.154 | 0.37  | 2.53E-12 | 8 |
| ATP5I.1    | 1.85E-16 | 0.576546925  | 0.245 | 0.532 | 4.26E-12 | 8 |
| SUMO1.1    | 5.36E-16 | 0.525413384  | 0.167 | 0.394 | 1.23E-11 | 8 |
| SLC25A3.2  | 7.20E-16 | 0.605092133  | 0.184 | 0.422 | 1.65E-11 | 8 |
| HLA-DRB1.8 | 8.15E-16 | -0.693566728 | 0.349 | 0.601 | 1.87E-11 | 8 |
| TMEM59.1   | 9.44E-16 | 0.657036972  | 0.222 | 0.488 | 2.17E-11 | 8 |
| WASF2.2    | 9.74E-16 | 0.615041989  | 0.137 | 0.339 | 2.24E-11 | 8 |
| BRK1.1     | 1.16E-15 | 0.595013649  | 0.199 | 0.449 | 2.66E-11 | 8 |
| ITM2B.7    | 1.99E-15 | 1.002005448  | 0.636 | 0.786 | 4.58E-11 | 8 |
| PSMB1.1    | 3.83E-15 | 0.673082228  | 0.195 | 0.434 | 8.81E-11 | 8 |
| OSTC.1     | 4.45E-15 | 0.527088545  | 0.102 | 0.272 | 1.02E-10 | 8 |
| MORF4L1    | 7.01E-15 | 0.633410767  | 0.257 | 0.548 | 1.61E-10 | 8 |
| PSMD8.2    | 7.40E-15 | 0.554384925  | 0.132 | 0.318 | 1.70E-10 | 8 |
| NDUFA11.2  | 1.05E-14 | 0.651342813  | 0.179 | 0.404 | 2.40E-10 | 8 |
| CD9.2      | 2.13E-14 | 1.946590086  | 0.299 | 0.22  | 4.89E-10 | 8 |
| PSMB7.2    | 2.23E-14 | 0.513335676  | 0.114 | 0.284 | 5.12E-10 | 8 |
| RAB7A.3    | 2.25E-14 | 0.632947808  | 0.137 | 0.323 | 5.17E-10 | 8 |
| IGKC.5     | 4.72E-14 | -2.507020314 | 0.13  | 0.303 | 1.08E-09 | 8 |
| LSM3.1     | 5.21E-14 | 0.602980655  | 0.102 | 0.264 | 1.20E-09 | 8 |
| SNRPG.2    | 6.31E-14 | 0.656142156  | 0.164 | 0.366 | 1.45E-09 | 8 |
| CSTB.4     | 7.07E-14 | 0.566045898  | 0.187 | 0.407 | 1.62E-09 | 8 |
| TMEM219.5  | 7.76E-14 | 0.531890814  | 0.112 | 0.278 | 1.78E-09 | 8 |
| NDUFB4.5   | 8.03E-14 | 0.573698711  | 0.195 | 0.42  | 1.85E-09 | 8 |
| SRP14.2    | 9.23E-14 | 1.332083084  | 0.566 | 0.722 | 2.12E-09 | 8 |
| PSMD4      | 1.10E-13 | 0.573801709  | 0.1   | 0.26  | 2.54E-09 | 8 |
| PSMA4.1    | 1.34E-13 | 0.65670133   | 0.145 | 0.332 | 3.09E-09 | 8 |
| NFE2L2.5   | 1.58E-13 | 0.573755165  | 0.109 | 0.27  | 3.63E-09 | 8 |
| COX6A1.2   | 1.60E-13 | 0.773257234  | 0.254 | 0.53  | 3.68E-09 | 8 |
| UQCRCQ.6   | 1.98E-13 | 0.559016525  | 0.229 | 0.472 | 4.56E-09 | 8 |
| GYPC.5     | 2.11E-13 | 0.581233466  | 0.137 | 0.314 | 4.84E-09 | 8 |
| ATP1B3.5   | 2.26E-13 | 0.619499359  | 0.112 | 0.275 | 5.20E-09 | 8 |
| DBI.1      | 3.51E-13 | 0.676890417  | 0.204 | 0.433 | 8.07E-09 | 8 |
| A2M.1      | 4.25E-13 | 1.659450391  | 0.272 | 0.193 | 9.76E-09 | 8 |
| NDUFB7.1   | 5.57E-13 | 0.665819891  | 0.154 | 0.343 | 1.28E-08 | 8 |
| IFITM2.5   | 5.89E-13 | 1.5181708    | 0.457 | 0.476 | 1.35E-08 | 8 |
| YWHAQ.3    | 1.10E-12 | 0.551550882  | 0.165 | 0.357 | 2.52E-08 | 8 |
| PDIA6.2    | 1.26E-12 | 0.630249844  | 0.139 | 0.313 | 2.89E-08 | 8 |
| CLTA.4     | 1.27E-12 | 0.703084774  | 0.129 | 0.298 | 2.92E-08 | 8 |
| ROMO1.3    | 1.57E-12 | 0.586298868  | 0.142 | 0.319 | 3.60E-08 | 8 |
| BSG.2      | 1.60E-12 | 0.560518619  | 0.154 | 0.336 | 3.68E-08 | 8 |
| MRFAP1     | 1.83E-12 | 0.643912055  | 0.144 | 0.317 | 4.20E-08 | 8 |
| ARL6IP1.2  | 2.70E-12 | 0.762954689  | 0.149 | 0.328 | 6.20E-08 | 8 |
| PSMB6      | 2.82E-12 | 0.695735546  | 0.122 | 0.284 | 6.49E-08 | 8 |
| SEPT2.2    | 3.26E-12 | 0.61206541   | 0.114 | 0.268 | 7.49E-08 | 8 |
| SHFM1.4    | 3.30E-12 | 0.72960991   | 0.197 | 0.416 | 7.59E-08 | 8 |

|             |          |              |       |       |             |   |
|-------------|----------|--------------|-------|-------|-------------|---|
| PSMC5.1     | 3.35E-12 | 0.58351425   | 0.11  | 0.264 | 7.70E-08    | 8 |
| FIS1.1      | 3.58E-12 | 0.711767917  | 0.142 | 0.316 | 8.22E-08    | 8 |
| SEP15.1     | 5.70E-12 | 0.803442945  | 0.149 | 0.327 | 1.31E-07    | 8 |
| MRPL51.3    | 6.21E-12 | 0.606200703  | 0.117 | 0.272 | 1.43E-07    | 8 |
| PPP1CB.5    | 8.07E-12 | 0.526564025  | 0.137 | 0.303 | 1.85E-07    | 8 |
| RHOB.6      | 8.64E-12 | 1.532829235  | 0.387 | 0.347 | 1.99E-07    | 8 |
| NDUFC2.2    | 1.06E-11 | 0.746272327  | 0.137 | 0.302 | 2.43E-07    | 8 |
| COX6C.2     | 1.06E-11 | 0.74229139   | 0.287 | 0.58  | 2.43E-07    | 8 |
| METTL9.2    | 1.07E-11 | 0.560872449  | 0.129 | 0.288 | 2.46E-07    | 8 |
| DYNLRB1.3   | 1.22E-11 | 0.75851613   | 0.152 | 0.329 | 2.80E-07    | 8 |
| ATP5J.4     | 1.44E-11 | 0.746494038  | 0.197 | 0.403 | 3.32E-07    | 8 |
| GNB2.1      | 1.59E-11 | 0.749557418  | 0.115 | 0.27  | 3.66E-07    | 8 |
| AP2S1.6     | 2.11E-11 | 0.653872949  | 0.147 | 0.317 | 4.84E-07    | 8 |
| APOE.7      | 2.23E-11 | -0.848136319 | 0.254 | 0.446 | 5.13E-07    | 8 |
| CD99.5      | 3.22E-11 | 0.736987706  | 0.239 | 0.48  | 7.41E-07    | 8 |
| PRDX2.5     | 3.31E-11 | 0.522181088  | 0.122 | 0.271 | 7.62E-07    | 8 |
| PRDX5.2     | 3.35E-11 | 0.821827012  | 0.172 | 0.359 | 7.71E-07    | 8 |
| GNG5.4      | 8.90E-11 | 0.797456786  | 0.175 | 0.36  | 2.05E-06    | 8 |
| GABARAPL2.2 | 1.09E-10 | 0.824832089  | 0.174 | 0.356 | 2.50E-06    | 8 |
| TMEM50A.1   | 1.28E-10 | 0.715098927  | 0.165 | 0.345 | 2.94E-06    | 8 |
| ANXA5.5     | 1.33E-10 | 0.673210672  | 0.175 | 0.36  | 3.06E-06    | 8 |
| TMEM230     | 1.45E-10 | 0.763153538  | 0.162 | 0.335 | 3.32E-06    | 8 |
| RAB2A.2     | 3.06E-10 | 0.614441813  | 0.13  | 0.276 | 7.04E-06    | 8 |
| CALR.2      | 5.35E-10 | 0.636722388  | 0.237 | 0.453 | 1.23E-05    | 8 |
| CHMP2A.4    | 6.92E-10 | 0.808475652  | 0.159 | 0.323 | 1.59E-05    | 8 |
| IFNGR1.5    | 1.03E-09 | 0.529318281  | 0.125 | 0.265 | 2.36E-05    | 8 |
| RHOA.4      | 1.20E-09 | 0.716594469  | 0.27  | 0.519 | 2.75E-05    | 8 |
| GSTO1.2     | 1.97E-09 | 0.870159239  | 0.164 | 0.33  | 4.52E-05    | 8 |
| PPIB.2      | 2.27E-09 | 0.754062608  | 0.259 | 0.497 | 5.22E-05    | 8 |
| SH3GLB1.2   | 3.55E-09 | 0.744091314  | 0.134 | 0.274 | 8.16E-05    | 8 |
| EID1.2      | 4.46E-09 | 0.898205496  | 0.224 | 0.437 | 0.000102515 | 8 |
| DAD1.1      | 8.58E-09 | 0.844282838  | 0.19  | 0.367 | 0.00019722  | 8 |
| GNAS.3      | 1.11E-08 | 0.827056117  | 0.182 | 0.352 | 0.000254589 | 8 |
| NDUFC1.6    | 1.78E-08 | 0.624194605  | 0.142 | 0.277 | 0.000410006 | 8 |
| LAMP1.2     | 2.55E-08 | 0.917875234  | 0.16  | 0.311 | 0.000586263 | 8 |
| CD63.7      | 2.93E-08 | 1.252300507  | 0.466 | 0.522 | 0.000674088 | 8 |
| KDEL2.3     | 6.84E-08 | 0.772906754  | 0.137 | 0.266 | 0.001573032 | 8 |
| RAB5C.4     | 7.39E-08 | 0.884064026  | 0.139 | 0.274 | 0.001697724 | 8 |
| SKP1.1      | 9.36E-08 | 0.713768269  | 0.331 | 0.615 | 0.002151295 | 8 |
| VAMP5.4     | 1.21E-07 | 1.978297849  | 0.324 | 0.307 | 0.002790898 | 8 |
| COX17.3     | 1.56E-07 | 0.927056069  | 0.172 | 0.325 | 0.003574066 | 8 |
| PSMA7.3     | 1.70E-07 | 0.920281448  | 0.287 | 0.534 | 0.003902777 | 8 |
| MRPL33.1    | 2.20E-07 | 0.860903619  | 0.159 | 0.298 | 0.005064037 | 8 |
| POLR2L.2    | 3.63E-07 | 0.804103623  | 0.244 | 0.446 | 0.008341645 | 8 |
| HLA-C.5     | 3.73E-07 | 0.51382419   | 0.78  | 0.887 | 0.00856594  | 8 |
| TCEB2.2     | 4.01E-07 | 0.841744501  | 0.316 | 0.582 | 0.009224235 | 8 |
| RABAC1.2    | 4.93E-07 | 0.932849267  | 0.2   | 0.364 | 0.011334315 | 8 |
| HSP90B1.2   | 6.90E-07 | 0.830849881  | 0.234 | 0.414 | 0.015852434 | 8 |
| NDUFA4.3    | 7.45E-07 | 0.886868763  | 0.302 | 0.55  | 0.017130604 | 8 |
| SLIRP.5     | 8.15E-07 | 0.902205206  | 0.152 | 0.28  | 0.01873346  | 8 |
| GUK1.1      | 1.48E-06 | 0.867675776  | 0.289 | 0.516 | 0.033919493 | 8 |
| YWHAE.6     | 1.65E-06 | 0.996718335  | 0.177 | 0.318 | 0.037851533 | 8 |
| BCAP31.1    | 1.89E-06 | 0.97928669   | 0.157 | 0.285 | 0.043333952 | 8 |
| ANXA2.4     | 2.04E-06 | 0.726573785  | 0.232 | 0.4   | 0.046857032 | 8 |
| HLA-DRB5.8  | 0        | 3.179752372  | 0.974 | 0.347 | 0           | 9 |
| HLA-DRA.9   | 0        | 2.978219886  | 1     | 0.659 | 0           | 9 |
| HLA-DPA1.9  | 0        | 2.814642076  | 1     | 0.552 | 0           | 9 |
| HLA-DQA1.6  | 0        | 2.788872073  | 0.998 | 0.315 | 0           | 9 |

|            |   |             |       |       |   |   |
|------------|---|-------------|-------|-------|---|---|
| HLA-DPB1.8 | 0 | 2.750163409 | 1     | 0.616 | 0 | 9 |
| HLA-DQB1.7 | 0 | 2.704578751 | 0.998 | 0.366 | 0 | 9 |
| C1QB.4     | 0 | 2.649218072 | 0.842 | 0.209 | 0 | 9 |
| HLA-DQA2.1 | 0 | 2.558996848 | 0.91  | 0.136 | 0 | 9 |
| C1QC.2     | 0 | 2.432305039 | 0.75  | 0.129 | 0 | 9 |
| LYZ.8      | 0 | 2.243230498 | 0.986 | 0.324 | 0 | 9 |
| MS4A6A.3   | 0 | 2.145181836 | 0.936 | 0.162 | 0 | 9 |
| GPX1.8     | 0 | 2.140842384 | 1     | 0.404 | 0 | 9 |
| CST3.8     | 0 | 2.109766811 | 0.998 | 0.359 | 0 | 9 |
| SGK1.1     | 0 | 2.097863837 | 0.903 | 0.153 | 0 | 9 |
| HLA-DMA.7  | 0 | 1.971624779 | 0.986 | 0.257 | 0 | 9 |
| GRN.8      | 0 | 1.923384344 | 0.965 | 0.223 | 0 | 9 |
| NPC2.7     | 0 | 1.915414002 | 0.991 | 0.353 | 0 | 9 |
| HLA-DMB.2  | 0 | 1.883279168 | 0.972 | 0.178 | 0 | 9 |
| CTSH.1     | 0 | 1.860867225 | 0.931 | 0.144 | 0 | 9 |
| MS4A7.1    | 0 | 1.848489544 | 0.893 | 0.12  | 0 | 9 |
| MAFB.1     | 0 | 1.832306037 | 0.771 | 0.105 | 0 | 9 |
| CPVL.1     | 0 | 1.792711505 | 0.811 | 0.096 | 0 | 9 |
| FAM26F.1   | 0 | 1.75923433  | 0.827 | 0.105 | 0 | 9 |
| RNASE6.1   | 0 | 1.74877906  | 0.873 | 0.118 | 0 | 9 |
| KLF4       | 0 | 1.737208366 | 0.811 | 0.09  | 0 | 9 |
| GNMB.1     | 0 | 1.736301761 | 0.539 | 0.072 | 0 | 9 |
| AIF1.9     | 0 | 1.678471788 | 0.971 | 0.229 | 0 | 9 |
| CD68.2     | 0 | 1.677349323 | 0.88  | 0.167 | 0 | 9 |
| ALDH2.1    | 0 | 1.554565306 | 0.894 | 0.123 | 0 | 9 |
| GPR34.1    | 0 | 1.537522642 | 0.614 | 0.074 | 0 | 9 |
| MSR1.1     | 0 | 1.486081612 | 0.737 | 0.088 | 0 | 9 |
| C1orf162.2 | 0 | 1.457556851 | 0.919 | 0.183 | 0 | 9 |
| PHACTR1.1  | 0 | 1.432347165 | 0.641 | 0.059 | 0 | 9 |
| KCTD12.1   | 0 | 1.418534302 | 0.861 | 0.105 | 0 | 9 |
| FCGR2A.1   | 0 | 1.403542866 | 0.823 | 0.111 | 0 | 9 |
| CSF2RA.1   | 0 | 1.388021356 | 0.778 | 0.078 | 0 | 9 |
| LST1.3     | 0 | 1.370869832 | 0.96  | 0.195 | 0 | 9 |
| PKIB.1     | 0 | 1.352672144 | 0.601 | 0.053 | 0 | 9 |
| MS4A4A.1   | 0 | 1.336747281 | 0.579 | 0.069 | 0 | 9 |
| PPT1.5     | 0 | 1.335150608 | 0.894 | 0.213 | 0 | 9 |
| CXCL16.1   | 0 | 1.300994345 | 0.828 | 0.111 | 0 | 9 |
| C3AR1.1    | 0 | 1.30096392  | 0.672 | 0.091 | 0 | 9 |
| FGL2.1     | 0 | 1.28987511  | 0.809 | 0.122 | 0 | 9 |
| IFI30.1    | 0 | 1.274995981 | 0.679 | 0.087 | 0 | 9 |
| CPM.1      | 0 | 1.273049446 | 0.702 | 0.113 | 0 | 9 |
| IGSF6.1    | 0 | 1.259029693 | 0.652 | 0.074 | 0 | 9 |
| SPI1.1     | 0 | 1.258946035 | 0.879 | 0.111 | 0 | 9 |
| OLR1.1     | 0 | 1.2405654   | 0.594 | 0.06  | 0 | 9 |
| VSIG4.1    | 0 | 1.232143352 | 0.607 | 0.079 | 0 | 9 |
| CYBB.1     | 0 | 1.21733793  | 0.761 | 0.097 | 0 | 9 |
| LY86.1     | 0 | 1.216219336 | 0.776 | 0.085 | 0 | 9 |
| MNDA.2     | 0 | 1.19974518  | 0.83  | 0.111 | 0 | 9 |
| SLC1A3.1   | 0 | 1.196394228 | 0.702 | 0.079 | 0 | 9 |
| NCOA4.1    | 0 | 1.189023745 | 0.806 | 0.151 | 0 | 9 |
| PLXDC2.1   | 0 | 1.180566695 | 0.754 | 0.098 | 0 | 9 |
| IL18.1     | 0 | 1.167850586 | 0.745 | 0.079 | 0 | 9 |
| RNF130.1   | 0 | 1.148587446 | 0.818 | 0.138 | 0 | 9 |
| CTSZ.1     | 0 | 1.140096192 | 0.756 | 0.132 | 0 | 9 |
| CSF1R.1    | 0 | 1.133953492 | 0.711 | 0.085 | 0 | 9 |
| ANKRD22.1  | 0 | 1.118360154 | 0.591 | 0.055 | 0 | 9 |
| CD163.1    | 0 | 1.098449652 | 0.707 | 0.101 | 0 | 9 |
| CLEC4E.1   | 0 | 1.08003712  | 0.655 | 0.087 | 0 | 9 |

|                 |           |             |       |       |           |   |
|-----------------|-----------|-------------|-------|-------|-----------|---|
| CSTA.2          | 0         | 1.075608276 | 0.742 | 0.105 | 0         | 9 |
| FCGR1A.1        | 0         | 1.073618644 | 0.553 | 0.065 | 0         | 9 |
| TNFSF13B.1      | 0         | 1.072474123 | 0.726 | 0.106 | 0         | 9 |
| RP11-1143G9.4.1 | 0         | 1.066826631 | 0.7   | 0.098 | 0         | 9 |
| SERPINF1.1      | 0         | 1.06553312  | 0.61  | 0.067 | 0         | 9 |
| CD302.1         | 0         | 1.054266009 | 0.756 | 0.099 | 0         | 9 |
| SLC7A7.1        | 0         | 1.047428311 | 0.664 | 0.077 | 0         | 9 |
| CLEC10A         | 0         | 1.043056538 | 0.364 | 0.009 | 0         | 9 |
| MARCH1.1        | 0         | 1.039976788 | 0.685 | 0.075 | 0         | 9 |
| PLAUR.1         | 0         | 1.025921473 | 0.646 | 0.1   | 0         | 9 |
| LY96.1          | 0         | 1.013146754 | 0.731 | 0.095 | 0         | 9 |
| CLEC7A.1        | 0         | 1.012442483 | 0.782 | 0.107 | 0         | 9 |
| RAB31.1         | 0         | 0.999084247 | 0.74  | 0.104 | 0         | 9 |
| FCGR2B.1        | 0         | 0.993228589 | 0.522 | 0.067 | 0         | 9 |
| OGFRL1.1        | 0         | 0.984235785 | 0.66  | 0.103 | 0         | 9 |
| CD83            | 0         | 0.979565496 | 0.548 | 0.055 | 0         | 9 |
| AXL.1           | 0         | 0.96924061  | 0.53  | 0.064 | 0         | 9 |
| CD86.1          | 0         | 0.964248107 | 0.664 | 0.071 | 0         | 9 |
| IRF8.1          | 0         | 0.9570397   | 0.515 | 0.063 | 0         | 9 |
| SLC31A2.1       | 0         | 0.951127005 | 0.636 | 0.083 | 0         | 9 |
| NLRP3.1         | 0         | 0.932307262 | 0.485 | 0.057 | 0         | 9 |
| MFSD1.1         | 0         | 0.91401687  | 0.712 | 0.122 | 0         | 9 |
| TBXAS1.1        | 0         | 0.910822611 | 0.667 | 0.103 | 0         | 9 |
| LILRB4.1        | 0         | 0.898813722 | 0.612 | 0.079 | 0         | 9 |
| CLEC12A.1       | 0         | 0.896995424 | 0.607 | 0.063 | 0         | 9 |
| HLA-DQB2        | 0         | 0.895835453 | 0.397 | 0.023 | 0         | 9 |
| CECR1.1         | 0         | 0.889294332 | 0.653 | 0.09  | 0         | 9 |
| IL13RA1.1       | 0         | 0.889103158 | 0.655 | 0.091 | 0         | 9 |
| LGALS2          | 0         | 0.87807869  | 0.575 | 0.08  | 0         | 9 |
| RGS18.1         | 0         | 0.876425358 | 0.622 | 0.072 | 0         | 9 |
| FPR3            | 0         | 0.873521896 | 0.463 | 0.02  | 0         | 9 |
| NCF2.1          | 0         | 0.868515116 | 0.579 | 0.066 | 0         | 9 |
| BASP1.1         | 0         | 0.851531405 | 0.482 | 0.053 | 0         | 9 |
| TLR2.1          | 0         | 0.849011219 | 0.631 | 0.083 | 0         | 9 |
| SRGAP1.1        | 0         | 0.834122202 | 0.619 | 0.089 | 0         | 9 |
| PILRA.1         | 0         | 0.830931291 | 0.57  | 0.074 | 0         | 9 |
| RAB32.1         | 0         | 0.804475891 | 0.553 | 0.073 | 0         | 9 |
| CCDC88A.1       | 0         | 0.795535433 | 0.591 | 0.085 | 0         | 9 |
| TM6SF1.1        | 0         | 0.78775736  | 0.515 | 0.059 | 0         | 9 |
| LYN.1           | 0         | 0.77666336  | 0.648 | 0.099 | 0         | 9 |
| SDS             | 0         | 0.772989546 | 0.258 | 0.014 | 0         | 9 |
| HCK.1           | 0         | 0.765245446 | 0.556 | 0.063 | 0         | 9 |
| PLBD1.1         | 0         | 0.75263117  | 0.56  | 0.074 | 0         | 9 |
| ADAP2.1         | 0         | 0.71188269  | 0.522 | 0.066 | 0         | 9 |
| LILRB3.1        | 0         | 0.674115644 | 0.539 | 0.058 | 0         | 9 |
| ST14.1          | 0         | 0.672229883 | 0.477 | 0.046 | 0         | 9 |
| GCLC.1          | 0         | 0.662656174 | 0.452 | 0.046 | 0         | 9 |
| SLAMF8.1        | 0         | 0.658774742 | 0.414 | 0.03  | 0         | 9 |
| HLA-DOA.1       | 0         | 0.623553019 | 0.511 | 0.062 | 0         | 9 |
| KYNU.1          | 0         | 0.56699132  | 0.432 | 0.045 | 0         | 9 |
| FCER1G.9        | 2.77E-306 | 1.610573574 | 0.981 | 0.274 | 6.38E-302 | 9 |
| SAP30.1         | 1.15E-305 | 0.833145536 | 0.596 | 0.09  | 2.65E-301 | 9 |
| GPR183.1        | 2.04E-303 | 1.674260658 | 0.87  | 0.205 | 4.68E-299 | 9 |
| C1QA.9          | 2.84E-303 | 2.542018606 | 0.849 | 0.224 | 6.52E-299 | 9 |
| ATP6V1B2.1      | 9.15E-302 | 0.851780746 | 0.683 | 0.118 | 2.10E-297 | 9 |
| PAK1.1          | 1.48E-301 | 0.72510517  | 0.565 | 0.08  | 3.40E-297 | 9 |
| IFNGR2.1        | 3.81E-297 | 0.716669025 | 0.626 | 0.101 | 8.75E-293 | 9 |
| HLA-DRB1.9      | 2.34E-296 | 2.36269474  | 1     | 0.573 | 5.38E-292 | 9 |

|            |           |             |       |       |           |   |
|------------|-----------|-------------|-------|-------|-----------|---|
| GNAQ.1     | 6.91E-296 | 0.84069171  | 0.666 | 0.113 | 1.59E-291 | 9 |
| CD74.7     | 7.69E-296 | 2.384380821 | 1     | 0.785 | 1.77E-291 | 9 |
| TYROBP.9   | 1.24E-293 | 1.933782682 | 0.988 | 0.362 | 2.85E-289 | 9 |
| MARCKS.1   | 7.73E-293 | 1.146240263 | 0.698 | 0.128 | 1.78E-288 | 9 |
| LGALS9.1   | 1.13E-291 | 0.774440795 | 0.617 | 0.098 | 2.60E-287 | 9 |
| CEBPD.6    | 1.58E-291 | 1.54336365  | 0.924 | 0.251 | 3.63E-287 | 9 |
| C1orf54.1  | 3.52E-291 | 0.843489712 | 0.51  | 0.069 | 8.08E-287 | 9 |
| SNX10.1    | 4.38E-291 | 1.036790578 | 0.809 | 0.172 | 1.01E-286 | 9 |
| GAPT.1     | 5.61E-290 | 0.888922054 | 0.466 | 0.058 | 1.29E-285 | 9 |
| CTSB.8     | 6.02E-290 | 1.661167916 | 0.946 | 0.274 | 1.38E-285 | 9 |
| CTSS.7     | 3.12E-289 | 1.668607583 | 0.979 | 0.336 | 7.17E-285 | 9 |
| MPEG1      | 9.62E-289 | 0.574876831 | 0.385 | 0.038 | 2.21E-284 | 9 |
| AP1S2.2    | 7.50E-288 | 1.085774776 | 0.861 | 0.198 | 1.72E-283 | 9 |
| NUDT16.1   | 6.43E-284 | 0.786904625 | 0.721 | 0.135 | 1.48E-279 | 9 |
| IFNGR1.6   | 3.56E-282 | 1.173199727 | 0.917 | 0.231 | 8.17E-278 | 9 |
| LACTB.1    | 7.21E-281 | 0.6647325   | 0.53  | 0.076 | 1.66E-276 | 9 |
| HEXB.1     | 5.87E-279 | 0.911081454 | 0.769 | 0.16  | 1.35E-274 | 9 |
| CHPT1.1    | 2.04E-277 | 0.780570158 | 0.66  | 0.117 | 4.70E-273 | 9 |
| THEMIS2.1  | 3.15E-276 | 0.648998929 | 0.605 | 0.098 | 7.24E-272 | 9 |
| SRGAP2B.1  | 4.90E-276 | 0.741189642 | 0.6   | 0.097 | 1.13E-271 | 9 |
| PLD4.1     | 1.26E-274 | 0.748062274 | 0.473 | 0.061 | 2.89E-270 | 9 |
| CD14.2     | 1.28E-274 | 1.180662047 | 0.66  | 0.12  | 2.93E-270 | 9 |
| CD300A.1   | 3.13E-274 | 0.718871578 | 0.57  | 0.088 | 7.20E-270 | 9 |
| TREM2.1    | 1.32E-273 | 0.973656929 | 0.516 | 0.072 | 3.02E-269 | 9 |
| P2RY13.1   | 6.76E-273 | 0.786206708 | 0.402 | 0.045 | 1.55E-268 | 9 |
| CAPG.2     | 1.63E-272 | 1.257977235 | 0.858 | 0.203 | 3.74E-268 | 9 |
| DSE.1      | 1.69E-271 | 0.624100774 | 0.484 | 0.065 | 3.89E-267 | 9 |
| RGS10.5    | 3.49E-271 | 1.293442737 | 0.946 | 0.267 | 8.01E-267 | 9 |
| DAB2.1     | 6.08E-271 | 1.099731728 | 0.695 | 0.139 | 1.40E-266 | 9 |
| FCGRT.4    | 2.22E-270 | 1.069842667 | 0.884 | 0.214 | 5.11E-266 | 9 |
| GNB4.1     | 6.17E-270 | 0.693685863 | 0.525 | 0.077 | 1.42E-265 | 9 |
| MEF2C.1    | 2.50E-268 | 0.737383749 | 0.705 | 0.127 | 5.75E-264 | 9 |
| CFD.1      | 3.29E-267 | 1.328191102 | 0.636 | 0.119 | 7.57E-263 | 9 |
| FBP1.1     | 6.22E-267 | 0.731925934 | 0.484 | 0.067 | 1.43E-262 | 9 |
| RBM47.1    | 7.19E-267 | 0.582163778 | 0.468 | 0.063 | 1.65E-262 | 9 |
| LIMS1.6    | 2.34E-262 | 1.116038394 | 0.873 | 0.222 | 5.37E-258 | 9 |
| FGR.1      | 3.13E-259 | 0.626131663 | 0.581 | 0.095 | 7.20E-255 | 9 |
| BTK.1      | 4.76E-257 | 0.549610875 | 0.418 | 0.051 | 1.09E-252 | 9 |
| SIGLEC10.1 | 1.16E-254 | 0.614706732 | 0.447 | 0.059 | 2.67E-250 | 9 |
| SHTN1.1    | 5.72E-254 | 0.556739471 | 0.395 | 0.047 | 1.31E-249 | 9 |
| ACSL1.1    | 1.23E-253 | 0.690429677 | 0.574 | 0.097 | 2.84E-249 | 9 |
| TYMP.7     | 1.52E-252 | 1.314051027 | 0.912 | 0.269 | 3.49E-248 | 9 |
| GRINA.1    | 2.32E-252 | 0.765470149 | 0.683 | 0.137 | 5.34E-248 | 9 |
| C5AR1.1    | 2.84E-252 | 0.844912433 | 0.471 | 0.067 | 6.53E-248 | 9 |
| SLCO2B1.1  | 4.27E-252 | 0.702217234 | 0.452 | 0.062 | 9.81E-248 | 9 |
| TCOF1      | 3.57E-248 | 1.073408979 | 0.594 | 0.107 | 8.22E-244 | 9 |
| KCNMA1.1   | 4.02E-247 | 0.775492171 | 0.433 | 0.058 | 9.23E-243 | 9 |
| LRRC25.1   | 4.23E-247 | 0.518954436 | 0.418 | 0.053 | 9.72E-243 | 9 |
| FAM105A.1  | 3.04E-246 | 0.662261243 | 0.563 | 0.094 | 6.98E-242 | 9 |
| RNF13.1    | 8.21E-246 | 0.87578913  | 0.778 | 0.182 | 1.89E-241 | 9 |
| CLN8.1     | 1.55E-245 | 0.723508602 | 0.548 | 0.091 | 3.56E-241 | 9 |
| LAIR1.1    | 7.29E-245 | 0.711503477 | 0.582 | 0.101 | 1.68E-240 | 9 |
| ALCAM.1    | 2.21E-243 | 0.62791443  | 0.458 | 0.065 | 5.09E-239 | 9 |
| NAMPT.2    | 3.60E-243 | 0.825909307 | 0.834 | 0.207 | 8.28E-239 | 9 |
| C15orf48   | 1.27E-242 | 1.048892289 | 0.354 | 0.038 | 2.93E-238 | 9 |
| TNFAIP2.1  | 1.54E-242 | 0.544714615 | 0.402 | 0.05  | 3.54E-238 | 9 |
| H2AFY.5    | 5.97E-241 | 1.097561222 | 0.896 | 0.257 | 1.37E-236 | 9 |
| SLC8A1.1   | 1.69E-240 | 0.582547031 | 0.471 | 0.068 | 3.89E-236 | 9 |

|           |           |             |       |       |           |   |
|-----------|-----------|-------------|-------|-------|-----------|---|
| ASAH1.4   | 2.12E-240 | 1.256505193 | 0.818 | 0.216 | 4.87E-236 | 9 |
| LPCAT2.1  | 4.12E-240 | 0.605191022 | 0.473 | 0.069 | 9.48E-236 | 9 |
| UBE2E2.1  | 1.26E-238 | 0.507087508 | 0.419 | 0.056 | 2.90E-234 | 9 |
| PSAP.8    | 2.51E-238 | 1.865841675 | 0.983 | 0.446 | 5.77E-234 | 9 |
| CREG1.1   | 1.10E-236 | 0.690121902 | 0.596 | 0.112 | 2.52E-232 | 9 |
| GLUL.7    | 1.35E-234 | 1.204046609 | 0.922 | 0.28  | 3.11E-230 | 9 |
| ADORA3.1  | 1.50E-234 | 0.579791095 | 0.364 | 0.043 | 3.44E-230 | 9 |
| BRI3.1    | 1.70E-233 | 0.756420651 | 0.671 | 0.14  | 3.90E-229 | 9 |
| YWHAH.7   | 2.73E-233 | 1.199092284 | 0.88  | 0.257 | 6.27E-229 | 9 |
| PSTPIP2.1 | 1.13E-230 | 0.635315602 | 0.437 | 0.062 | 2.59E-226 | 9 |
| ITGAX.1   | 1.59E-230 | 0.56735874  | 0.395 | 0.051 | 3.65E-226 | 9 |
| NAGA.1    | 4.38E-228 | 0.502841128 | 0.432 | 0.061 | 1.01E-223 | 9 |
| UNC93B1.1 | 5.14E-228 | 0.512893792 | 0.43  | 0.061 | 1.18E-223 | 9 |
| SCPEP1.1  | 5.92E-228 | 0.749070309 | 0.603 | 0.117 | 1.36E-223 | 9 |
| PYCARD.5  | 1.29E-227 | 0.939712506 | 0.851 | 0.221 | 2.97E-223 | 9 |
| PABPC4.1  | 1.24E-226 | 0.798236144 | 0.764 | 0.177 | 2.84E-222 | 9 |
| TPP1.1    | 9.42E-225 | 0.718845226 | 0.723 | 0.161 | 2.16E-220 | 9 |
| DAPK1.1   | 1.09E-223 | 0.510519565 | 0.395 | 0.053 | 2.50E-219 | 9 |
| MGAT1.1   | 1.31E-223 | 0.718862899 | 0.759 | 0.177 | 3.01E-219 | 9 |
| CD9.3     | 6.29E-221 | 1.022184537 | 0.789 | 0.199 | 1.45E-216 | 9 |
| FNIP2     | 1.64E-220 | 0.550729999 | 0.426 | 0.061 | 3.77E-216 | 9 |
| DRAM2.1   | 1.70E-219 | 0.730892142 | 0.686 | 0.152 | 3.92E-215 | 9 |
| SLC11A1.1 | 2.14E-218 | 0.803322784 | 0.588 | 0.112 | 4.91E-214 | 9 |
| LGMN      | 2.72E-217 | 0.927623439 | 0.438 | 0.068 | 6.25E-213 | 9 |
| RGS2.8    | 5.16E-216 | 1.308635571 | 0.915 | 0.31  | 1.18E-211 | 9 |
| FMNL2.1   | 1.50E-215 | 0.538169192 | 0.357 | 0.045 | 3.45E-211 | 9 |
| ALOX5.1   | 8.35E-215 | 0.573752812 | 0.494 | 0.083 | 1.92E-210 | 9 |
| HBEGF.1   | 9.54E-215 | 0.651518212 | 0.352 | 0.043 | 2.19E-210 | 9 |
| APOC1.7   | 1.07E-213 | 2.045125573 | 0.847 | 0.259 | 2.45E-209 | 9 |
| SRGAP2.1  | 1.33E-212 | 0.557990399 | 0.501 | 0.085 | 3.06E-208 | 9 |
| LAT2.1    | 1.63E-207 | 0.546942079 | 0.477 | 0.08  | 3.73E-203 | 9 |
| ABHD12.1  | 4.91E-202 | 0.531974902 | 0.489 | 0.086 | 1.13E-197 | 9 |
| FCGR3A.4  | 2.01E-201 | 1.210572875 | 0.789 | 0.21  | 4.61E-197 | 9 |
| SAT1.7    | 2.51E-201 | 1.505737223 | 0.995 | 0.616 | 5.76E-197 | 9 |
| NR4A3     | 7.02E-201 | 0.523235914 | 0.289 | 0.031 | 1.61E-196 | 9 |
| PRCP.1    | 9.35E-198 | 0.541097973 | 0.539 | 0.105 | 2.15E-193 | 9 |
| ATP6V0B.5 | 3.53E-197 | 0.831243779 | 0.88  | 0.27  | 8.11E-193 | 9 |
| ATP6AP1.1 | 8.86E-197 | 0.57537285  | 0.652 | 0.145 | 2.04E-192 | 9 |
| ALOX15B.1 | 1.75E-195 | 0.503997566 | 0.286 | 0.031 | 4.02E-191 | 9 |
| C3.1      | 6.22E-194 | 0.564202115 | 0.596 | 0.121 | 1.43E-189 | 9 |
| STX7.1    | 8.86E-193 | 0.519207033 | 0.562 | 0.114 | 2.04E-188 | 9 |
| TKT.2     | 4.60E-189 | 0.675395602 | 0.775 | 0.205 | 1.06E-184 | 9 |
| ATP1B3.6  | 7.05E-189 | 0.936138372 | 0.825 | 0.245 | 1.62E-184 | 9 |
| MRPL3.1   | 2.57E-186 | 0.53384367  | 0.607 | 0.133 | 5.91E-182 | 9 |
| RAC1.6    | 7.49E-186 | 1.023451415 | 0.984 | 0.425 | 1.72E-181 | 9 |
| ZFAND5.6  | 1.91E-185 | 1.120664201 | 0.86  | 0.284 | 4.39E-181 | 9 |
| CD4.1     | 1.88E-184 | 0.574939726 | 0.57  | 0.119 | 4.32E-180 | 9 |
| LGALS3.4  | 9.68E-183 | 1.112425097 | 0.769 | 0.223 | 2.23E-178 | 9 |
| PICALM.1  | 2.02E-181 | 0.604468462 | 0.692 | 0.168 | 4.64E-177 | 9 |
| FTH1.8    | 9.85E-181 | 1.196987638 | 1     | 0.961 | 2.26E-176 | 9 |
| ATG3.1    | 1.04E-179 | 0.52894676  | 0.627 | 0.146 | 2.39E-175 | 9 |
| SKAP2.1   | 5.27E-179 | 0.579540236 | 0.657 | 0.157 | 1.21E-174 | 9 |
| LIPA.1    | 1.23E-178 | 1.188207452 | 0.64  | 0.165 | 2.82E-174 | 9 |
| CNPY3.1   | 1.36E-178 | 0.608164703 | 0.757 | 0.194 | 3.14E-174 | 9 |
| SAMHD1.1  | 6.61E-178 | 0.691639914 | 0.728 | 0.185 | 1.52E-173 | 9 |
| HMGA1.1   | 2.09E-177 | 0.633480597 | 0.475 | 0.091 | 4.81E-173 | 9 |
| MAP3K8.1  | 1.52E-175 | 0.695765526 | 0.586 | 0.132 | 3.49E-171 | 9 |
| FTL.7     | 1.55E-173 | 1.712149825 | 1     | 0.934 | 3.55E-169 | 9 |

|            |           |             |       |       |           |   |
|------------|-----------|-------------|-------|-------|-----------|---|
| HMOX1.1    | 1.64E-173 | 0.687190126 | 0.49  | 0.098 | 3.78E-169 | 9 |
| C10orf54.6 | 1.73E-173 | 0.788077345 | 0.842 | 0.257 | 3.97E-169 | 9 |
| SRGAP2C.1  | 1.44E-172 | 0.580365649 | 0.551 | 0.119 | 3.31E-168 | 9 |
| IER3.1     | 3.01E-171 | 0.638692242 | 0.47  | 0.093 | 6.91E-167 | 9 |
| ATF3       | 3.05E-171 | 0.694220831 | 0.579 | 0.132 | 7.02E-167 | 9 |
| VMO1.1     | 4.41E-170 | 0.510084473 | 0.321 | 0.045 | 1.01E-165 | 9 |
| MEF2A.1    | 8.35E-170 | 0.580291207 | 0.619 | 0.142 | 1.92E-165 | 9 |
| HEXA.1     | 1.21E-169 | 0.576988989 | 0.688 | 0.175 | 2.79E-165 | 9 |
| SYNGR2.1   | 3.05E-169 | 0.524221569 | 0.622 | 0.148 | 7.00E-165 | 9 |
| LAP3.1     | 3.26E-166 | 0.621535267 | 0.586 | 0.138 | 7.50E-162 | 9 |
| AOAH.2     | 6.33E-166 | 0.586355709 | 0.567 | 0.128 | 1.46E-161 | 9 |
| AKR1B1.2   | 3.02E-164 | 0.647671637 | 0.752 | 0.215 | 6.93E-160 | 9 |
| ANXA5.6    | 1.32E-163 | 0.830549722 | 0.906 | 0.328 | 3.02E-159 | 9 |
| SDCBP.7    | 2.43E-162 | 0.954486705 | 0.899 | 0.35  | 5.59E-158 | 9 |
| AP2S1.7    | 2.10E-161 | 0.621981338 | 0.88  | 0.286 | 4.84E-157 | 9 |
| ARRB2.1    | 1.93E-160 | 0.502574525 | 0.686 | 0.176 | 4.44E-156 | 9 |
| HCLS1.4    | 2.00E-160 | 0.824245461 | 0.884 | 0.298 | 4.61E-156 | 9 |
| SLC40A1.1  | 4.30E-160 | 0.826808176 | 0.374 | 0.066 | 9.89E-156 | 9 |
| APOE.8     | 1.26E-159 | 2.395774849 | 0.905 | 0.418 | 2.91E-155 | 9 |
| COTL1.4    | 7.99E-159 | 1.11677683  | 0.951 | 0.412 | 1.84E-154 | 9 |
| ARL5A.2    | 4.12E-158 | 0.558767926 | 0.759 | 0.211 | 9.48E-154 | 9 |
| HERPUD1.6  | 1.56E-157 | 1.340858572 | 0.958 | 0.472 | 3.58E-153 | 9 |
| COMT.1     | 1.93E-157 | 0.506548844 | 0.645 | 0.166 | 4.43E-153 | 9 |
| SOAT1.1    | 7.19E-157 | 0.509502    | 0.452 | 0.091 | 1.65E-152 | 9 |
| CMTM6.1    | 3.56E-155 | 0.556394854 | 0.73  | 0.204 | 8.19E-151 | 9 |
| LTA4H.1    | 4.20E-155 | 0.586595087 | 0.574 | 0.14  | 9.66E-151 | 9 |
| ATP6V1F.7  | 1.98E-153 | 0.762663859 | 0.894 | 0.326 | 4.56E-149 | 9 |
| SLC43A2.1  | 2.66E-153 | 0.518317294 | 0.392 | 0.072 | 6.10E-149 | 9 |
| SLC25A5.3  | 1.18E-152 | 0.872880979 | 0.915 | 0.363 | 2.71E-148 | 9 |
| FABP5.1    | 3.37E-151 | 0.799446041 | 0.671 | 0.187 | 7.75E-147 | 9 |
| PLEK.2     | 2.02E-148 | 0.571224862 | 0.563 | 0.134 | 4.64E-144 | 9 |
| ATP6AP2.4  | 1.63E-146 | 0.661168873 | 0.844 | 0.284 | 3.75E-142 | 9 |
| FAM49B.4   | 2.11E-146 | 0.705943799 | 0.899 | 0.316 | 4.85E-142 | 9 |
| LPAR6.1    | 2.33E-144 | 0.597979451 | 0.553 | 0.134 | 5.37E-140 | 9 |
| PLD3.1     | 1.91E-143 | 0.71489112  | 0.529 | 0.132 | 4.40E-139 | 9 |
| RHOG.3     | 3.10E-142 | 0.609409145 | 0.78  | 0.242 | 7.14E-138 | 9 |
| PPA1.1     | 4.82E-142 | 0.78472137  | 0.686 | 0.21  | 1.11E-137 | 9 |
| MIS18BP1.2 | 6.36E-142 | 0.595996163 | 0.679 | 0.189 | 1.46E-137 | 9 |
| RNH1.3     | 9.61E-142 | 0.533638772 | 0.787 | 0.249 | 2.21E-137 | 9 |
| AZI2.1     | 1.15E-140 | 0.551308516 | 0.494 | 0.115 | 2.63E-136 | 9 |
| PTPRE      | 4.40E-140 | 0.616847573 | 0.565 | 0.144 | 1.01E-135 | 9 |
| RTN4.7     | 9.75E-140 | 0.62140954  | 0.901 | 0.326 | 2.24E-135 | 9 |
| GLIPR1.6   | 1.33E-138 | 0.599167008 | 0.853 | 0.275 | 3.05E-134 | 9 |
| JAML.1     | 4.28E-137 | 0.520311198 | 0.636 | 0.174 | 9.83E-133 | 9 |
| REL.5      | 4.12E-132 | 0.779218578 | 0.856 | 0.299 | 9.47E-128 | 9 |
| VAMP8.4    | 4.57E-132 | 0.835718187 | 0.941 | 0.44  | 1.05E-127 | 9 |
| CTSL.1     | 1.11E-131 | 0.761660527 | 0.536 | 0.142 | 2.55E-127 | 9 |
| CEBPB.7    | 1.25E-131 | 0.657466345 | 0.844 | 0.306 | 2.88E-127 | 9 |
| GDI2.8     | 1.35E-131 | 0.572596053 | 0.827 | 0.29  | 3.11E-127 | 9 |
| SNX3.7     | 2.66E-128 | 0.677715218 | 0.915 | 0.361 | 6.12E-124 | 9 |
| RHOB.7     | 9.04E-128 | 0.683074065 | 0.873 | 0.326 | 2.08E-123 | 9 |
| TUBA1B.7   | 2.84E-127 | 0.742024084 | 0.92  | 0.392 | 6.54E-123 | 9 |
| SEC11A.3   | 5.78E-125 | 0.578726995 | 0.873 | 0.316 | 1.33E-120 | 9 |
| MT-CO1.4   | 7.54E-125 | 0.682529823 | 0.991 | 0.923 | 1.73E-120 | 9 |
| YBX1.5     | 9.66E-124 | 0.785696774 | 0.997 | 0.656 | 2.22E-119 | 9 |
| GSTO1.3    | 5.03E-122 | 0.523459939 | 0.83  | 0.301 | 1.16E-117 | 9 |
| GPX4.7     | 3.30E-121 | 0.677856042 | 0.941 | 0.433 | 7.58E-117 | 9 |
| FKBP5.5    | 1.22E-120 | 0.724934514 | 0.927 | 0.373 | 2.81E-116 | 9 |

|           |           |              |       |       |           |   |
|-----------|-----------|--------------|-------|-------|-----------|---|
| ACP5      | 1.34E-120 | 0.561492219  | 0.402 | 0.089 | 3.09E-116 | 9 |
| HSPA1A.3  | 1.76E-119 | 0.705312639  | 0.657 | 0.216 | 4.04E-115 | 9 |
| S100A11.8 | 1.63E-118 | 0.921633017  | 0.979 | 0.574 | 3.76E-114 | 9 |
| SMAP2.5   | 1.49E-117 | 0.582370749  | 0.801 | 0.276 | 3.42E-113 | 9 |
| ANXA2.5   | 2.09E-117 | 0.76330166   | 0.889 | 0.372 | 4.80E-113 | 9 |
| AREG.1    | 3.47E-115 | 1.584445643  | 0.589 | 0.193 | 7.98E-111 | 9 |
| SH3BGRL4  | 1.41E-110 | 0.576562506  | 0.908 | 0.368 | 3.23E-106 | 9 |
| CYBA.5    | 2.82E-109 | 0.811548416  | 0.991 | 0.674 | 6.49E-105 | 9 |
| CTSC.7    | 2.22E-104 | 0.667701397  | 0.818 | 0.326 | 5.10E-100 | 9 |
| LAPTM5.7  | 5.27E-100 | 0.739748393  | 0.99  | 0.549 | 1.21E-95  | 9 |
| ITGB2.7   | 1.44E-96  | 0.678277986  | 0.901 | 0.394 | 3.32E-92  | 9 |
| MALAT1.8  | 1.68E-96  | -1.0503903   | 0.998 | 0.982 | 3.86E-92  | 9 |
| ARPC3.4   | 4.42E-96  | 0.63484575   | 0.979 | 0.589 | 1.02E-91  | 9 |
| CSTB.5    | 6.11E-94  | 0.654129905  | 0.865 | 0.378 | 1.40E-89  | 9 |
| ARPC5.4   | 6.74E-88  | 0.504413448  | 0.899 | 0.415 | 1.55E-83  | 9 |
| MT-CO3.5  | 1.28E-86  | 0.574597402  | 0.988 | 0.875 | 2.94E-82  | 9 |
| NEAT1.5   | 1.59E-85  | 0.644128122  | 0.976 | 0.743 | 3.66E-81  | 9 |
| ARPC1B.2  | 8.42E-85  | 0.585758873  | 0.96  | 0.506 | 1.93E-80  | 9 |
| CD63.8    | 8.30E-83  | 0.627466945  | 0.962 | 0.501 | 1.91E-78  | 9 |
| RHOA.5    | 7.73E-79  | 0.545844964  | 0.943 | 0.489 | 1.78E-74  | 9 |
| OAZ1.6    | 1.18E-78  | 0.569267319  | 0.99  | 0.725 | 2.71E-74  | 9 |
| TSPO.5    | 1.90E-77  | 0.548351871  | 0.858 | 0.401 | 4.37E-73  | 9 |
| FOS.7     | 6.42E-76  | 0.697149037  | 0.971 | 0.669 | 1.48E-71  | 9 |
| RPS27.5   | 2.11E-75  | -0.701954875 | 1     | 0.974 | 4.85E-71  | 9 |
| MT-ND4.4  | 3.97E-75  | 0.531120521  | 0.988 | 0.869 | 9.11E-71  | 9 |
| ITM2B.8   | 1.02E-74  | 0.663208365  | 0.997 | 0.77  | 2.34E-70  | 9 |
| CTSD.4    | 1.28E-72  | 1.130104798  | 0.832 | 0.42  | 2.95E-68  | 9 |
| MT-ND1.4  | 7.96E-69  | 0.564447521  | 0.986 | 0.778 | 1.83E-64  | 9 |
| LGALS1.3  | 2.28E-67  | 0.529793811  | 0.938 | 0.557 | 5.24E-63  | 9 |
| RPS26.6   | 2.69E-61  | -0.789064785 | 0.988 | 0.865 | 6.19E-57  | 9 |
| IL32.9    | 1.19E-58  | -2.643970214 | 0.426 | 0.584 | 2.73E-54  | 9 |
| PABPC1.4  | 3.41E-57  | 0.523855626  | 0.979 | 0.649 | 7.83E-53  | 9 |
| CD2.8     | 2.01E-54  | -2.337075903 | 0.211 | 0.467 | 4.63E-50  | 9 |
| INSR.2    | 3.27E-52  | -0.709414862 | 0.378 | 0.126 | 7.51E-48  | 9 |
| SEPP1     | 6.84E-50  | 1.304680846  | 0.34  | 0.122 | 1.57E-45  | 9 |
| S100A9.8  | 3.98E-49  | -1.022046181 | 0.575 | 0.237 | 9.14E-45  | 9 |
| IGLC2     | 5.43E-49  | -2.671695112 | 0.277 | 0.081 | 1.25E-44  | 9 |
| ETS1.9    | 7.45E-49  | -1.554222035 | 0.068 | 0.35  | 1.71E-44  | 9 |
| RGS5      | 2.75E-48  | -1.045827339 | 0.354 | 0.116 | 6.32E-44  | 9 |
| CD3E.8    | 6.11E-48  | -1.823035872 | 0.153 | 0.408 | 1.40E-43  | 9 |
| TRAC.9    | 8.83E-46  | -2.327998858 | 0.217 | 0.441 | 2.03E-41  | 9 |
| RPL23A.6  | 4.24E-44  | -0.500551288 | 0.998 | 0.927 | 9.74E-40  | 9 |
| CCL5.8    | 5.49E-44  | -3.248565491 | 0.478 | 0.565 | 1.26E-39  | 9 |
| CD3G.8    | 7.93E-43  | -1.555689611 | 0.047 | 0.304 | 1.82E-38  | 9 |
| CD3D.9    | 8.86E-43  | -2.204829075 | 0.308 | 0.482 | 2.04E-38  | 9 |
| RPS29.6   | 1.54E-42  | -0.593680976 | 0.998 | 0.918 | 3.54E-38  | 9 |
| SYNE2.8   | 2.65E-42  | -1.480047071 | 0.088 | 0.343 | 6.09E-38  | 9 |
| RPL31.6   | 2.89E-39  | -0.557358201 | 0.995 | 0.903 | 6.64E-35  | 9 |
| GZMA.8    | 3.74E-39  | -2.353174477 | 0.231 | 0.427 | 8.60E-35  | 9 |
| S100A8.2  | 1.40E-38  | -1.312095842 | 0.48  | 0.199 | 3.22E-34  | 9 |
| APP.2     | 2.83E-38  | -0.554163545 | 0.426 | 0.168 | 6.50E-34  | 9 |
| HLA-A.6   | 1.80E-36  | -0.626243127 | 0.998 | 0.889 | 4.13E-32  | 9 |
| IFITM3.9  | 1.76E-34  | -0.726677335 | 0.776 | 0.361 | 4.06E-30  | 9 |
| ITM2A.9   | 5.58E-34  | -1.66427008  | 0.106 | 0.319 | 1.28E-29  | 9 |
| LCK.9     | 8.33E-32  | -1.287086478 | 0.092 | 0.296 | 1.91E-27  | 9 |
| TRBC2.8   | 4.55E-31  | -1.873180667 | 0.21  | 0.384 | 1.05E-26  | 9 |
| BTG1.8    | 1.46E-30  | -0.953489993 | 0.981 | 0.836 | 3.35E-26  | 9 |
| CD59.3    | 5.24E-30  | -0.923957397 | 0.504 | 0.221 | 1.20E-25  | 9 |



|            |           |              |       |       |             |    |
|------------|-----------|--------------|-------|-------|-------------|----|
| CST7.8     | 5.85E-28  | -1.92008804  | 0.243 | 0.395 | 1.34E-23    | 9  |
| ENPP2.1    | 1.78E-27  | -1.734757682 | 0.303 | 0.118 | 4.09E-23    | 9  |
| CD7.6      | 1.09E-26  | -1.564949481 | 0.13  | 0.307 | 2.52E-22    | 9  |
| CD27.8     | 2.10E-26  | -1.569003697 | 0.095 | 0.275 | 4.82E-22    | 9  |
| CD69.9     | 9.69E-25  | -2.245613002 | 0.506 | 0.53  | 2.23E-20    | 9  |
| IGKC.6     | 1.48E-24  | -3.241159783 | 0.596 | 0.283 | 3.40E-20    | 9  |
| TRBC1.8    | 1.19E-22  | -2.129225338 | 0.229 | 0.358 | 2.74E-18    | 9  |
| CLEC2D.8   | 1.43E-21  | -1.293053964 | 0.165 | 0.312 | 3.29E-17    | 9  |
| ATP1B1.2   | 7.99E-21  | -0.50510341  | 0.293 | 0.131 | 1.84E-16    | 9  |
| ACAP1.9    | 1.44E-20  | -1.232216957 | 0.208 | 0.338 | 3.32E-16    | 9  |
| CD96.9     | 2.82E-20  | -1.116719604 | 0.109 | 0.255 | 6.47E-16    | 9  |
| GZMK.9     | 6.65E-19  | -2.629458997 | 0.274 | 0.369 | 1.53E-14    | 9  |
| LTB.8      | 2.41E-18  | -1.439410569 | 0.18  | 0.307 | 5.54E-14    | 9  |
| TUBA4A.7   | 5.37E-18  | -1.225194195 | 0.147 | 0.278 | 1.23E-13    | 9  |
| NDUFC1.7   | 1.30E-17  | -0.61119348  | 0.511 | 0.26  | 2.98E-13    | 9  |
| CD52.6     | 6.91E-17  | -1.635028012 | 0.607 | 0.546 | 1.59E-12    | 9  |
| PPDPF.5    | 1.82E-16  | -1.088637943 | 0.816 | 0.653 | 4.18E-12    | 9  |
| DUSP2.8    | 2.11E-16  | -1.819286054 | 0.386 | 0.433 | 4.85E-12    | 9  |
| TSC22D3.6  | 4.27E-14  | -0.899572375 | 0.945 | 0.774 | 9.81E-10    | 9  |
| IGFBP7.9   | 4.67E-13  | -2.525080741 | 0.714 | 0.364 | 1.07E-08    | 9  |
| FYN.5      | 5.03E-13  | -1.072098471 | 0.175 | 0.27  | 1.16E-08    | 9  |
| OCIAD2.6   | 9.05E-13  | -1.077466858 | 0.168 | 0.265 | 2.08E-08    | 9  |
| RNF19A.8   | 1.25E-12  | -1.098620803 | 0.189 | 0.28  | 2.86E-08    | 9  |
| IL7R.7     | 1.80E-12  | -2.032293564 | 0.225 | 0.307 | 4.14E-08    | 9  |
| EVL.8      | 2.35E-12  | -1.212337623 | 0.544 | 0.493 | 5.39E-08    | 9  |
| MGP.1      | 9.10E-12  | -1.514923348 | 0.284 | 0.144 | 2.09E-07    | 9  |
| HBA2.7     | 1.23E-11  | -3.10284795  | 0.445 | 0.242 | 2.82E-07    | 9  |
| NKG7.9     | 1.32E-11  | -2.511656168 | 0.437 | 0.427 | 3.03E-07    | 9  |
| RGCC.8     | 1.46E-11  | -0.512762966 | 0.508 | 0.299 | 3.35E-07    | 9  |
| STK17A.8   | 3.95E-11  | -1.104380713 | 0.321 | 0.368 | 9.07E-07    | 9  |
| SYTL3.8    | 4.46E-11  | -1.103107485 | 0.201 | 0.28  | 1.03E-06    | 9  |
| HNRNPH1.2  | 4.71E-11  | -0.501553337 | 0.544 | 0.31  | 1.08E-06    | 9  |
| CRIP1.7    | 1.46E-10  | -0.986750983 | 0.213 | 0.297 | 3.35E-06    | 9  |
| HBB.5      | 1.52E-10  | -3.26422534  | 0.69  | 0.379 | 3.50E-06    | 9  |
| ODF2L.4    | 3.04E-10  | -0.959580035 | 0.18  | 0.263 | 6.98E-06    | 9  |
| GPX3       | 3.10E-10  | -0.588753435 | 0.289 | 0.16  | 7.12E-06    | 9  |
| BIRC3.7    | 2.36E-09  | -1.126768776 | 0.199 | 0.275 | 5.42E-05    | 9  |
| SEPW1.9    | 4.80E-09  | -0.703253409 | 0.619 | 0.348 | 0.000110199 | 9  |
| DNAJB1.7   | 1.17E-08  | -0.506287512 | 0.678 | 0.409 | 0.000269449 | 9  |
| DSTN.7     | 1.38E-08  | -0.879574924 | 0.525 | 0.298 | 0.000316494 | 9  |
| SEC61G.5   | 3.56E-08  | -0.51002983  | 0.74  | 0.425 | 0.000819048 | 9  |
| ADIRF.6    | 4.20E-08  | -1.751410617 | 0.411 | 0.234 | 0.00096493  | 9  |
| JUND.6     | 5.45E-08  | -0.502601346 | 0.518 | 0.3   | 0.001253258 | 9  |
| SPARC.1    | 5.59E-08  | -1.645188059 | 0.312 | 0.177 | 0.001284899 | 9  |
| CCL4.9     | 9.55E-08  | -2.301507239 | 0.482 | 0.438 | 0.002195045 | 9  |
| IVNS1ABP.1 | 1.11E-07  | -0.556726069 | 0.338 | 0.199 | 0.002543127 | 9  |
| GNLY.9     | 1.34E-07  | -2.441106525 | 0.432 | 0.245 | 0.003070282 | 9  |
| IGFBP3.8   | 2.76E-07  | -1.92328705  | 0.411 | 0.237 | 0.006331768 | 9  |
| KIAA1551.7 | 3.56E-07  | -1.011668959 | 0.317 | 0.336 | 0.008190398 | 9  |
| IL2RG.9    | 5.45E-07  | -1.053721955 | 0.383 | 0.372 | 0.012531846 | 9  |
| ROMO1.4    | 8.03E-07  | -0.524804597 | 0.506 | 0.303 | 0.01846251  | 9  |
| RARRES3.8  | 2.10E-06  | -0.977350867 | 0.43  | 0.41  | 0.04817984  | 9  |
| NDUFA4L2.9 | 1.34E-254 | 2.985929806  | 0.829 | 0.269 | 3.09E-250   | 10 |
| BBOX1      | 2.35E-252 | 2.727853546  | 0.301 | 0.025 | 5.40E-248   | 10 |
| CD24.2     | 5.44E-231 | 2.804527171  | 0.669 | 0.16  | 1.25E-226   | 10 |
| MALAT1.9   | 1.74E-228 | -3.169818309 | 0.855 | 0.987 | 4.01E-224   | 10 |
| TMSB4X.4   | 1.07E-201 | -2.103811389 | 0.811 | 0.983 | 2.46E-197   | 10 |
| CRYAB.9    | 7.30E-185 | 2.852420521  | 0.707 | 0.243 | 1.68E-180   | 10 |

|            |           |              |       |       |           |    |
|------------|-----------|--------------|-------|-------|-----------|----|
| KRT18      | 3.83E-180 | 2.738028737  | 0.464 | 0.092 | 8.79E-176 | 10 |
| FXYD2      | 6.14E-180 | 2.696772184  | 0.522 | 0.119 | 1.41E-175 | 10 |
| GAPDH.6    | 6.39E-163 | 1.838012567  | 0.926 | 0.864 | 1.47E-158 | 10 |
| CMBL       | 5.37E-162 | 2.448268383  | 0.331 | 0.05  | 1.23E-157 | 10 |
| B2M.7      | 6.01E-161 | -1.385114066 | 0.908 | 0.991 | 1.38E-156 | 10 |
| BHMT       | 2.33E-157 | 2.330573453  | 0.267 | 0.032 | 5.35E-153 | 10 |
| CYB5A.3    | 6.37E-154 | 2.819936948  | 0.622 | 0.215 | 1.46E-149 | 10 |
| SRGN.6     | 1.28E-144 | -2.298930279 | 0.157 | 0.815 | 2.95E-140 | 10 |
| BTG1.9     | 1.24E-142 | -2.278607171 | 0.303 | 0.862 | 2.84E-138 | 10 |
| MT-CO1.5   | 5.78E-138 | -1.536186987 | 0.612 | 0.937 | 1.33E-133 | 10 |
| LDHA.9     | 2.41E-136 | 2.294730335  | 0.817 | 0.57  | 5.54E-132 | 10 |
| NAT8       | 2.24E-134 | 2.835831413  | 0.263 | 0.037 | 5.15E-130 | 10 |
| CXCL14     | 4.42E-133 | 2.505065566  | 0.319 | 0.056 | 1.02E-128 | 10 |
| ADIRF.7    | 3.55E-130 | 2.22293341   | 0.624 | 0.227 | 8.16E-126 | 10 |
| MT-ND3.8   | 1.74E-128 | -1.819934449 | 0.279 | 0.85  | 3.99E-124 | 10 |
| NEAT1.6    | 2.46E-128 | -2.100720763 | 0.161 | 0.775 | 5.65E-124 | 10 |
| BNIP3.1    | 5.86E-120 | 2.410687531  | 0.448 | 0.122 | 1.35E-115 | 10 |
| CXCR4.7    | 6.87E-118 | -2.176372568 | 0.235 | 0.795 | 1.58E-113 | 10 |
| FTH1.9     | 1.17E-117 | 0.90147522   | 0.976 | 0.962 | 2.70E-113 | 10 |
| HLA-E.8    | 4.08E-117 | -1.666376734 | 0.213 | 0.811 | 9.38E-113 | 10 |
| ZFP36L2.9  | 5.02E-117 | -2.369836586 | 0.131 | 0.719 | 1.15E-112 | 10 |
| HLA-B.7    | 8.78E-117 | -1.346380964 | 0.562 | 0.927 | 2.02E-112 | 10 |
| PTPRC.9    | 1.83E-116 | -2.280208281 | 0.042 | 0.638 | 4.21E-112 | 10 |
| KRT8       | 2.32E-114 | 2.477873279  | 0.376 | 0.088 | 5.32E-110 | 10 |
| DDX5.7     | 2.83E-112 | -1.599211443 | 0.259 | 0.831 | 6.51E-108 | 10 |
| ANXA4.2    | 4.83E-112 | 2.726141668  | 0.466 | 0.146 | 1.11E-107 | 10 |
| MT-CO2.5   | 2.11E-110 | -1.420589577 | 0.454 | 0.89  | 4.86E-106 | 10 |
| HLA-C.6    | 1.60E-109 | -1.38742519  | 0.414 | 0.9   | 3.67E-105 | 10 |
| MT-ND2.5   | 2.22E-108 | -1.423162076 | 0.406 | 0.883 | 5.11E-104 | 10 |
| MT-ATP6.5  | 3.62E-108 | -1.406405749 | 0.394 | 0.876 | 8.31E-104 | 10 |
| RGS1.10    | 7.77E-104 | -2.335960419 | 0.185 | 0.716 | 1.79E-99  | 10 |
| S100A4.8   | 9.82E-104 | -2.06557217  | 0.173 | 0.719 | 2.26E-99  | 10 |
| ALDOA.4    | 1.44E-102 | 2.070128478  | 0.769 | 0.632 | 3.31E-98  | 10 |
| MT-ND4.5   | 2.48E-102 | -1.271505124 | 0.438 | 0.89  | 5.70E-98  | 10 |
| FTL.8      | 2.76E-101 | 0.808849628  | 0.958 | 0.936 | 6.35E-97  | 10 |
| MT-ND1.5   | 1.24E-99  | -1.52406474  | 0.275 | 0.806 | 2.85E-95  | 10 |
| MT-CO3.6   | 1.02E-97  | -1.229159183 | 0.468 | 0.895 | 2.35E-93  | 10 |
| MT-CYB.6   | 5.23E-95  | -1.343093422 | 0.327 | 0.822 | 1.20E-90  | 10 |
| TXNIP.8    | 1.36E-94  | -1.635864318 | 0.267 | 0.782 | 3.13E-90  | 10 |
| ARHGDIB.3  | 2.90E-94  | -1.383137453 | 0.135 | 0.692 | 6.65E-90  | 10 |
| ENO1.8     | 9.95E-89  | 2.091427182  | 0.745 | 0.588 | 2.29E-84  | 10 |
| PDZK1IP1.1 | 1.56E-88  | 2.229037537  | 0.386 | 0.113 | 3.59E-84  | 10 |
| LAPTM5.8   | 1.19E-85  | -1.592910605 | 0.076 | 0.585 | 2.73E-81  | 10 |
| EVL.9      | 2.31E-85  | -1.832826983 | 0.026 | 0.513 | 5.32E-81  | 10 |
| CORO1A.7   | 1.17E-84  | -1.452537278 | 0.08  | 0.583 | 2.70E-80  | 10 |
| LGALS2.1   | 2.81E-84  | 2.258028548  | 0.335 | 0.091 | 6.47E-80  | 10 |
| ARPC2.5    | 1.83E-83  | -1.286740379 | 0.137 | 0.656 | 4.21E-79  | 10 |
| SRSF7.7    | 2.70E-83  | -1.540498237 | 0.064 | 0.562 | 6.21E-79  | 10 |
| N4BP2L2.7  | 2.61E-81  | -1.33528524  | 0.06  | 0.547 | 6.01E-77  | 10 |
| CD44.6     | 8.48E-81  | -1.692364981 | 0.034 | 0.508 | 1.95E-76  | 10 |
| HCST.8     | 1.20E-80  | -1.538078764 | 0.072 | 0.562 | 2.76E-76  | 10 |
| PNISR.7    | 5.82E-79  | -1.471351812 | 0.052 | 0.527 | 1.34E-74  | 10 |
| FYB.8      | 1.13E-77  | -1.80989335  | 0.024 | 0.476 | 2.61E-73  | 10 |
| NNMT.10    | 1.59E-77  | 1.832540521  | 0.59  | 0.288 | 3.66E-73  | 10 |
| CD52.7     | 1.98E-77  | -1.929699745 | 0.1   | 0.565 | 4.54E-73  | 10 |
| MT-ND5.7   | 2.86E-77  | -1.287932033 | 0.133 | 0.628 | 6.56E-73  | 10 |
| CD53.5     | 5.64E-77  | -1.612062106 | 0.034 | 0.487 | 1.29E-72  | 10 |
| SH3BGRL3.6 | 2.29E-76  | -1.14636774  | 0.193 | 0.7   | 5.25E-72  | 10 |

|            |          |              |       |       |          |    |
|------------|----------|--------------|-------|-------|----------|----|
| STK4.6     | 7.37E-76 | -1.566217392 | 0.032 | 0.488 | 1.69E-71 | 10 |
| CCL5.9     | 5.17E-74 | -2.352593658 | 0.133 | 0.578 | 1.19E-69 | 10 |
| CD37.6     | 3.34E-73 | -1.539259225 | 0.038 | 0.479 | 7.67E-69 | 10 |
| JUNB.9     | 6.35E-72 | -1.361734012 | 0.265 | 0.74  | 1.46E-67 | 10 |
| CD69.10    | 1.02E-71 | -1.941256432 | 0.092 | 0.545 | 2.34E-67 | 10 |
| CD2.9      | 5.69E-70 | -2.07065763  | 0.046 | 0.472 | 1.31E-65 | 10 |
| JUN.6      | 6.39E-70 | -1.454496604 | 0.245 | 0.708 | 1.47E-65 | 10 |
| GMFG.4     | 1.55E-69 | -1.069104053 | 0.106 | 0.573 | 3.57E-65 | 10 |
| FXYD5.4    | 1.61E-68 | -1.147773821 | 0.056 | 0.497 | 3.71E-64 | 10 |
| PRPF38B.9  | 1.89E-68 | -1.476407562 | 0.028 | 0.45  | 4.35E-64 | 10 |
| SON.7      | 1.90E-68 | -0.869378026 | 0.114 | 0.586 | 4.38E-64 | 10 |
| MCL1.5     | 1.92E-68 | -1.251735322 | 0.082 | 0.53  | 4.41E-64 | 10 |
| MIF.8      | 1.99E-68 | 1.902847376  | 0.669 | 0.499 | 4.57E-64 | 10 |
| TNFAIP3.10 | 1.80E-67 | -1.710538938 | 0.042 | 0.462 | 4.13E-63 | 10 |
| MGST1.1    | 4.66E-67 | 2.120869385  | 0.333 | 0.104 | 1.07E-62 | 10 |
| ACTB.5     | 1.02E-66 | -1.031222673 | 0.675 | 0.938 | 2.34E-62 | 10 |
| CYTIP.8    | 2.06E-66 | -1.316174536 | 0.06  | 0.491 | 4.72E-62 | 10 |
| KLF6.8     | 4.19E-66 | -1.273884814 | 0.199 | 0.666 | 9.63E-62 | 10 |
| AKAP13.8   | 6.29E-66 | -1.330202538 | 0.032 | 0.447 | 1.45E-61 | 10 |
| RBM39.7    | 6.66E-66 | -1.042497675 | 0.11  | 0.562 | 1.53E-61 | 10 |
| ANXA1.9    | 7.83E-66 | -1.876306738 | 0.064 | 0.486 | 1.80E-61 | 10 |
| ARGLU1.6   | 1.23E-65 | -1.364657617 | 0.032 | 0.448 | 2.83E-61 | 10 |
| LCP1.8     | 4.27E-65 | -1.593467275 | 0.022 | 0.418 | 9.81E-61 | 10 |
| GATM       | 1.23E-64 | 2.174314058  | 0.253 | 0.066 | 2.82E-60 | 10 |
| POLR2J3.6  | 1.24E-64 | -1.561826458 | 0.014 | 0.408 | 2.85E-60 | 10 |
| HLA-F.8    | 1.33E-64 | -1.166592683 | 0.038 | 0.453 | 3.05E-60 | 10 |
| TMEM176A.1 | 3.03E-64 | 2.048782912  | 0.378 | 0.138 | 6.97E-60 | 10 |
| CELF2.7    | 3.16E-64 | -1.287017465 | 0.032 | 0.44  | 7.27E-60 | 10 |
| TP1.7      | 3.51E-64 | 1.907167028  | 0.675 | 0.56  | 8.06E-60 | 10 |
| ZFP36.6    | 7.37E-64 | -1.238556937 | 0.221 | 0.68  | 1.69E-59 | 10 |
| CD3D.10    | 8.45E-64 | -1.611257187 | 0.068 | 0.49  | 1.94E-59 | 10 |
| CCND1      | 1.22E-63 | 2.032321194  | 0.291 | 0.085 | 2.81E-59 | 10 |
| XIST.6     | 2.57E-62 | -1.629497017 | 0.038 | 0.438 | 5.91E-58 | 10 |
| NUPR1.2    | 7.53E-62 | 2.021719752  | 0.355 | 0.126 | 1.73E-57 | 10 |
| ELF1.8     | 1.68E-61 | -1.225817671 | 0.05  | 0.455 | 3.86E-57 | 10 |
| EEF1A1.6   | 2.48E-61 | 0.703462384  | 0.978 | 0.968 | 5.70E-57 | 10 |
| LSP1.9     | 9.36E-60 | -1.236485029 | 0.054 | 0.448 | 2.15E-55 | 10 |
| TMEM176B.1 | 1.40E-59 | 2.114540221  | 0.378 | 0.146 | 3.22E-55 | 10 |
| STK17B.6   | 1.46E-59 | -1.341230775 | 0.03  | 0.414 | 3.36E-55 | 10 |
| CFL1.2     | 1.47E-59 | -0.870645888 | 0.299 | 0.763 | 3.37E-55 | 10 |
| ITGB2.8    | 2.92E-59 | -1.31189237  | 0.04  | 0.429 | 6.71E-55 | 10 |
| LRRFIP1.3  | 4.04E-59 | -1.195156516 | 0.038 | 0.426 | 9.28E-55 | 10 |
| PTMA.3     | 2.19E-58 | -0.777379653 | 0.627 | 0.928 | 5.02E-54 | 10 |
| SLA.8      | 2.22E-58 | -1.375057888 | 0.034 | 0.413 | 5.11E-54 | 10 |
| ARPC1B.3   | 2.42E-58 | -0.911728446 | 0.114 | 0.54  | 5.56E-54 | 10 |
| RSRP1.7    | 3.76E-58 | -1.148944556 | 0.042 | 0.426 | 8.65E-54 | 10 |
| IL2RG.10   | 1.10E-57 | -1.562427558 | 0.018 | 0.386 | 2.54E-53 | 10 |
| CD3E.9     | 1.82E-57 | -1.495737411 | 0.034 | 0.411 | 4.18E-53 | 10 |
| TRAC.10    | 2.85E-57 | -1.6792087   | 0.062 | 0.446 | 6.55E-53 | 10 |
| ALDH1A1    | 3.28E-57 | 2.267027103  | 0.275 | 0.084 | 7.54E-53 | 10 |
| GPSM3.6    | 4.45E-57 | -1.143240321 | 0.028 | 0.403 | 1.02E-52 | 10 |
| GZMA.9     | 7.41E-57 | -1.804300328 | 0.054 | 0.433 | 1.70E-52 | 10 |
| DUSP2.9    | 8.86E-57 | -1.899791506 | 0.066 | 0.445 | 2.04E-52 | 10 |
| DDX24.7    | 1.09E-56 | -0.878459805 | 0.072 | 0.471 | 2.51E-52 | 10 |
| CCNL1.8    | 1.33E-56 | -1.093992547 | 0.036 | 0.412 | 3.05E-52 | 10 |
| MYL12A.4   | 1.94E-56 | -0.845177211 | 0.253 | 0.706 | 4.45E-52 | 10 |
| PRRC2C.7   | 3.32E-56 | -1.086250141 | 0.06  | 0.447 | 7.63E-52 | 10 |
| IFI16.4    | 3.33E-56 | -0.830070011 | 0.092 | 0.495 | 7.66E-52 | 10 |

|                |          |              |       |       |          |    |
|----------------|----------|--------------|-------|-------|----------|----|
| CYBA.6         | 6.72E-56 | -0.835343703 | 0.259 | 0.703 | 1.55E-51 | 10 |
| SRSF5.6        | 1.02E-55 | -0.500927541 | 0.185 | 0.638 | 2.34E-51 | 10 |
| RP11-347P5.1.9 | 5.15E-55 | -1.663980189 | 0.028 | 0.388 | 1.18E-50 | 10 |
| RPL7.5         | 1.61E-54 | 0.829142414  | 0.863 | 0.922 | 3.69E-50 | 10 |
| ITGB1.5        | 1.62E-54 | -1.173643193 | 0.086 | 0.478 | 3.72E-50 | 10 |
| RAC2.10        | 3.12E-54 | -1.383126676 | 0.028 | 0.385 | 7.18E-50 | 10 |
| FOSB.5         | 1.34E-53 | -1.265178945 | 0.064 | 0.439 | 3.09E-49 | 10 |
| DDX3X.10       | 2.60E-53 | -1.211605441 | 0.06  | 0.428 | 5.97E-49 | 10 |
| VAMP2.7        | 2.70E-53 | -0.872480838 | 0.088 | 0.479 | 6.21E-49 | 10 |
| WIPF1.10       | 4.61E-53 | -1.249931168 | 0.012 | 0.355 | 1.06E-48 | 10 |
| TRBC2.9        | 7.24E-53 | -1.626795173 | 0.034 | 0.39  | 1.66E-48 | 10 |
| FNBP1.9        | 7.75E-53 | -1.1732081   | 0.028 | 0.38  | 1.78E-48 | 10 |
| RNF213.7       | 7.82E-53 | -1.188351015 | 0.04  | 0.4   | 1.80E-48 | 10 |
| PFN1.4         | 1.05E-52 | -0.757984627 | 0.341 | 0.776 | 2.40E-48 | 10 |
| TPT1.7         | 1.35E-52 | 0.779263891  | 0.9   | 0.925 | 3.09E-48 | 10 |
| RPS28.5        | 1.37E-52 | 0.616016601  | 0.93  | 0.948 | 3.15E-48 | 10 |
| MBNL1.6        | 1.40E-52 | -1.264628154 | 0.022 | 0.368 | 3.22E-48 | 10 |
| AAK1.9         | 1.46E-52 | -1.206561971 | 0.032 | 0.383 | 3.34E-48 | 10 |
| CCL4.10        | 1.99E-52 | -2.419394456 | 0.09  | 0.453 | 4.58E-48 | 10 |
| PLIN2.7        | 3.42E-52 | 2.041366094  | 0.536 | 0.329 | 7.87E-48 | 10 |
| TMA7.6         | 3.80E-52 | -0.629796643 | 0.255 | 0.712 | 8.73E-48 | 10 |
| CD48.8         | 4.86E-52 | -1.117090637 | 0.034 | 0.388 | 1.12E-47 | 10 |
| RHOA.6         | 1.31E-51 | -0.928739808 | 0.131 | 0.522 | 3.01E-47 | 10 |
| ANKRD12.6      | 1.37E-51 | -0.855458177 | 0.042 | 0.401 | 3.15E-47 | 10 |
| NKTR.7         | 3.31E-51 | -1.231765798 | 0.018 | 0.359 | 7.61E-47 | 10 |
| CLEC2B.5       | 6.25E-51 | -0.85285877  | 0.038 | 0.391 | 1.44E-46 | 10 |
| PPP2R5C.8      | 6.35E-51 | -1.338336655 | 0.05  | 0.403 | 1.46E-46 | 10 |
| HMGB2.6        | 1.14E-50 | -0.982380303 | 0.108 | 0.49  | 2.63E-46 | 10 |
| SEPT7.6        | 1.36E-50 | -0.578995119 | 0.124 | 0.527 | 3.12E-46 | 10 |
| FKBP5.6        | 1.40E-50 | -1.156456888 | 0.052 | 0.408 | 3.22E-46 | 10 |
| BTG2.6         | 1.67E-50 | -1.350866925 | 0.026 | 0.369 | 3.83E-46 | 10 |
| RPS6.3         | 1.99E-50 | 0.708332305  | 0.92  | 0.944 | 4.58E-46 | 10 |
| H3F3B.6        | 2.09E-50 | -0.810215092 | 0.438 | 0.849 | 4.81E-46 | 10 |
| PEBP1.8        | 2.24E-50 | 2.337966306  | 0.546 | 0.384 | 5.14E-46 | 10 |
| KMT2E.9        | 2.74E-50 | -0.956351394 | 0.06  | 0.417 | 6.31E-46 | 10 |
| CST7.9         | 6.28E-50 | -1.674698006 | 0.058 | 0.401 | 1.44E-45 | 10 |
| ATRX.6         | 9.84E-50 | -1.016819193 | 0.046 | 0.399 | 2.26E-45 | 10 |
| RPL3.5         | 1.18E-49 | 0.636452095  | 0.898 | 0.933 | 2.70E-45 | 10 |
| IDS.7          | 1.25E-49 | -1.226897361 | 0.044 | 0.385 | 2.88E-45 | 10 |
| HLA-DPA1.10    | 1.32E-49 | -1.703601724 | 0.201 | 0.584 | 3.04E-45 | 10 |
| YWHAZ.8        | 1.46E-49 | -0.667977608 | 0.118 | 0.508 | 3.35E-45 | 10 |
| CD99.6         | 2.29E-49 | -0.807275414 | 0.102 | 0.484 | 5.25E-45 | 10 |
| SRSF2.9        | 2.36E-49 | -0.885404921 | 0.074 | 0.436 | 5.42E-45 | 10 |
| FUS.9          | 2.69E-49 | -0.857009229 | 0.102 | 0.483 | 6.19E-45 | 10 |
| DNAJB1.8       | 3.62E-49 | -1.336494287 | 0.076 | 0.433 | 8.31E-45 | 10 |
| YWHA3          | 3.86E-49 | -0.790520118 | 0.116 | 0.501 | 8.88E-45 | 10 |
| HNRNPA2B1.4    | 8.85E-49 | -0.510704164 | 0.211 | 0.643 | 2.03E-44 | 10 |
| ARL6IP5.7      | 9.47E-49 | -0.555238429 | 0.092 | 0.471 | 2.18E-44 | 10 |
| ARID4B.9       | 1.00E-48 | -1.159674275 | 0.022 | 0.352 | 2.31E-44 | 10 |
| RPLP0.6        | 1.03E-48 | 1.041591447  | 0.771 | 0.845 | 2.38E-44 | 10 |
| WSB1.3         | 1.58E-48 | -1.012485094 | 0.034 | 0.372 | 3.63E-44 | 10 |
| PPP1R15A.6     | 1.70E-48 | -1.099018526 | 0.064 | 0.415 | 3.90E-44 | 10 |
| DDX17.6        | 2.84E-48 | -0.876242826 | 0.06  | 0.411 | 6.52E-44 | 10 |
| HLA-A.7        | 3.41E-48 | -0.6538517   | 0.572 | 0.906 | 7.83E-44 | 10 |
| KIAA1551.8     | 6.79E-48 | -1.232344558 | 0.022 | 0.347 | 1.56E-43 | 10 |
| GIMAP4.6       | 4.33E-47 | -1.060912617 | 0.026 | 0.35  | 9.95E-43 | 10 |
| EVI2B.5        | 5.09E-47 | -1.039437929 | 0.024 | 0.347 | 1.17E-42 | 10 |
| SMCHD1.4       | 9.46E-47 | -1.148592067 | 0.02  | 0.339 | 2.17E-42 | 10 |

|            |          |              |       |       |          |    |
|------------|----------|--------------|-------|-------|----------|----|
| REL.6      | 1.32E-46 | -1.24150731  | 0.018 | 0.333 | 3.03E-42 | 10 |
| TRA2B.4    | 1.83E-46 | -0.779672474 | 0.046 | 0.381 | 4.20E-42 | 10 |
| SH3KBP1.7  | 4.37E-46 | -1.097140429 | 0.01  | 0.319 | 1.00E-41 | 10 |
| NKG7.10    | 6.75E-46 | -1.970615428 | 0.106 | 0.439 | 1.55E-41 | 10 |
| STK17A.9   | 7.47E-46 | -1.122964154 | 0.046 | 0.378 | 1.72E-41 | 10 |
| ACTR2.5    | 7.93E-46 | -0.733328908 | 0.048 | 0.379 | 1.82E-41 | 10 |
| PIK3IP1.9  | 8.03E-46 | -1.060073686 | 0.042 | 0.37  | 1.85E-41 | 10 |
| FOS.8      | 1.08E-45 | -0.956857047 | 0.307 | 0.695 | 2.49E-41 | 10 |
| TPM3.3     | 1.27E-45 | -0.728922739 | 0.102 | 0.466 | 2.91E-41 | 10 |
| RBM25.6    | 1.57E-45 | -0.752580177 | 0.04  | 0.371 | 3.61E-41 | 10 |
| ACAP1.10   | 1.83E-45 | -1.22562972  | 0.028 | 0.344 | 4.20E-41 | 10 |
| PCSK7.9    | 2.21E-45 | -1.169369279 | 0.02  | 0.331 | 5.07E-41 | 10 |
| ISG20.7    | 2.71E-45 | -0.999459866 | 0.046 | 0.373 | 6.24E-41 | 10 |
| SAMSN1.4   | 2.84E-45 | -1.329017492 | 0.022 | 0.333 | 6.52E-41 | 10 |
| ROCK1.5    | 3.21E-45 | -0.912161306 | 0.026 | 0.342 | 7.37E-41 | 10 |
| LIMD2.9    | 4.17E-45 | -1.183319623 | 0.016 | 0.321 | 9.59E-41 | 10 |
| ETS1.10    | 5.01E-45 | -1.101400022 | 0.03  | 0.35  | 1.15E-40 | 10 |
| HCLS1.5    | 6.80E-45 | -1.171941261 | 0.022 | 0.333 | 1.56E-40 | 10 |
| CTSS.8     | 6.91E-45 | -1.32207211  | 0.048 | 0.374 | 1.59E-40 | 10 |
| SYNE2.9    | 7.44E-45 | -1.240406146 | 0.03  | 0.343 | 1.71E-40 | 10 |
| CKLF.5     | 7.71E-45 | -0.934432016 | 0.048 | 0.375 | 1.77E-40 | 10 |
| MT-ND4L.6  | 8.75E-45 | -0.89784378  | 0.048 | 0.372 | 2.01E-40 | 10 |
| SP100.6    | 1.03E-44 | -0.679990855 | 0.072 | 0.411 | 2.36E-40 | 10 |
| UCP2.7     | 1.35E-44 | -0.867841483 | 0.038 | 0.358 | 3.11E-40 | 10 |
| COTL1.5    | 1.85E-44 | -1.034503865 | 0.1   | 0.446 | 4.25E-40 | 10 |
| CFLAR.7    | 1.90E-44 | -0.794468475 | 0.088 | 0.435 | 4.37E-40 | 10 |
| HLA-DPB1.9 | 3.48E-44 | -1.494284644 | 0.277 | 0.645 | 8.01E-40 | 10 |
| FAM49B.5   | 3.95E-44 | -0.983091656 | 0.04  | 0.351 | 9.09E-40 | 10 |
| IQGAP1.4   | 5.09E-44 | -0.955254071 | 0.034 | 0.349 | 1.17E-39 | 10 |
| ARF6.5     | 5.17E-44 | -0.896446888 | 0.062 | 0.391 | 1.19E-39 | 10 |
| SARAF.4    | 8.57E-44 | -0.644053666 | 0.281 | 0.693 | 1.97E-39 | 10 |
| ALOX5AP.7  | 1.23E-43 | -1.335105645 | 0.03  | 0.34  | 2.82E-39 | 10 |
| ZFP36L1.6  | 1.33E-43 | -0.961331985 | 0.056 | 0.378 | 3.06E-39 | 10 |
| PPP1R2.7   | 1.65E-43 | -1.046002644 | 0.04  | 0.354 | 3.80E-39 | 10 |
| GPBP1.8    | 1.92E-43 | -0.922987494 | 0.042 | 0.357 | 4.41E-39 | 10 |
| AKAP9.6    | 2.27E-43 | -0.749212058 | 0.038 | 0.353 | 5.22E-39 | 10 |
| GZMK.10    | 2.81E-43 | -2.011222611 | 0.064 | 0.376 | 6.46E-39 | 10 |
| ITM2A.10   | 2.92E-43 | -1.42340478  | 0.02  | 0.321 | 6.70E-39 | 10 |
| RGS2.9     | 6.68E-43 | -1.484282907 | 0.038 | 0.346 | 1.53E-38 | 10 |
| CCND3.5    | 6.80E-43 | -0.742565206 | 0.05  | 0.371 | 1.56E-38 | 10 |
| CAPZB.4    | 7.75E-43 | -0.616601544 | 0.12  | 0.473 | 1.78E-38 | 10 |
| SCAF11.5   | 1.59E-42 | -0.693761162 | 0.054 | 0.372 | 3.64E-38 | 10 |
| IRF1.7     | 2.68E-42 | -1.201126187 | 0.024 | 0.321 | 6.16E-38 | 10 |
| FAM133B.4  | 3.33E-42 | -1.071057284 | 0.02  | 0.313 | 7.65E-38 | 10 |
| GLIPR1.7   | 3.48E-42 | -0.952868112 | 0.016 | 0.309 | 8.01E-38 | 10 |
| PRDM1.6    | 9.31E-42 | -1.418662753 | 0.014 | 0.302 | 2.14E-37 | 10 |
| CD7.7      | 1.18E-41 | -1.503973239 | 0.02  | 0.31  | 2.70E-37 | 10 |
| BCLAF1.7   | 1.33E-41 | -0.837611411 | 0.042 | 0.346 | 3.06E-37 | 10 |
| TERF2IP.6  | 1.90E-41 | -0.824659885 | 0.062 | 0.376 | 4.37E-37 | 10 |
| TNRC6B.6   | 2.07E-41 | -1.09459695  | 0.032 | 0.328 | 4.75E-37 | 10 |
| DOCK8.8    | 3.94E-41 | -1.023221204 | 0.016 | 0.302 | 9.06E-37 | 10 |
| GIMAP7.9   | 4.88E-41 | -1.313699127 | 0.012 | 0.295 | 1.12E-36 | 10 |
| JAK1.6     | 7.59E-41 | -0.546122882 | 0.08  | 0.407 | 1.74E-36 | 10 |
| STAT3.7    | 8.61E-41 | -0.825940982 | 0.032 | 0.329 | 1.98E-36 | 10 |
| LCK.10     | 1.70E-40 | -1.159325402 | 0.014 | 0.297 | 3.91E-36 | 10 |
| CLEC2D.9   | 1.96E-40 | -1.23981743  | 0.03  | 0.317 | 4.50E-36 | 10 |
| GCC2.7     | 2.34E-40 | -0.739234068 | 0.06  | 0.371 | 5.38E-36 | 10 |
| RPS4X.6    | 2.60E-40 | 0.678978578  | 0.9   | 0.94  | 5.99E-36 | 10 |

|             |          |              |       |       |          |    |
|-------------|----------|--------------|-------|-------|----------|----|
| CD3G.9      | 2.73E-40 | -1.173840783 | 0.02  | 0.303 | 6.28E-36 | 10 |
| CLK1.8      | 3.33E-40 | -0.76606452  | 0.06  | 0.368 | 7.65E-36 | 10 |
| MSN.4       | 5.03E-40 | -0.693729705 | 0.064 | 0.377 | 1.16E-35 | 10 |
| ARPC5.5     | 2.13E-39 | -0.608666126 | 0.11  | 0.447 | 4.90E-35 | 10 |
| PABPC1.5    | 2.59E-39 | -0.529116606 | 0.275 | 0.677 | 5.96E-35 | 10 |
| COX7C.2     | 3.91E-39 | 1.269082084  | 0.689 | 0.756 | 9.00E-35 | 10 |
| CREM.6      | 4.14E-39 | -1.250849086 | 0.016 | 0.29  | 9.51E-35 | 10 |
| RARRES2.1   | 5.27E-39 | 1.594790133  | 0.279 | 0.106 | 1.21E-34 | 10 |
| RGS10.6     | 6.69E-39 | -0.949180546 | 0.026 | 0.305 | 1.54E-34 | 10 |
| SEPT6.7     | 6.96E-39 | -0.89929444  | 0.014 | 0.287 | 1.60E-34 | 10 |
| EMB.7       | 7.30E-39 | -1.104067164 | 0.01  | 0.279 | 1.68E-34 | 10 |
| LGALS1.4    | 7.61E-39 | -0.839801292 | 0.223 | 0.585 | 1.75E-34 | 10 |
| C9orf16.2   | 1.01E-38 | -0.664350117 | 0.06  | 0.36  | 2.32E-34 | 10 |
| PIK3R1.7    | 1.63E-38 | -0.880862593 | 0.034 | 0.318 | 3.74E-34 | 10 |
| SMAP2.6     | 2.50E-38 | -0.822744362 | 0.026 | 0.308 | 5.74E-34 | 10 |
| CEBPB.8     | 2.97E-38 | -1.129448363 | 0.046 | 0.339 | 6.83E-34 | 10 |
| RAP1B.4     | 3.49E-38 | -0.885233295 | 0.046 | 0.334 | 8.01E-34 | 10 |
| MYO1F.5     | 3.55E-38 | -0.921014239 | 0.012 | 0.281 | 8.17E-34 | 10 |
| RPS8.5      | 3.83E-38 | 0.6703701    | 0.859 | 0.92  | 8.80E-34 | 10 |
| PDCD4.4     | 3.84E-38 | -0.97361729  | 0.034 | 0.314 | 8.83E-34 | 10 |
| DAB2.2      | 3.99E-38 | 2.134367233  | 0.333 | 0.156 | 9.18E-34 | 10 |
| HLA-DRB1.10 | 4.55E-38 | -1.485716135 | 0.263 | 0.603 | 1.05E-33 | 10 |
| LTB.9       | 5.11E-38 | -1.317434036 | 0.032 | 0.311 | 1.18E-33 | 10 |
| ADGRE5.8    | 6.57E-38 | -1.096037114 | 0.032 | 0.309 | 1.51E-33 | 10 |
| TRBC1.9     | 8.38E-38 | -1.487140353 | 0.072 | 0.364 | 1.93E-33 | 10 |
| EVI2A.6     | 9.78E-38 | -0.986468662 | 0.02  | 0.29  | 2.25E-33 | 10 |
| GNAS.4      | 1.23E-37 | -0.741068554 | 0.06  | 0.355 | 2.83E-33 | 10 |
| SYTL3.9     | 1.30E-37 | -1.203291005 | 0.018 | 0.287 | 2.99E-33 | 10 |
| RBPJ.5      | 1.34E-37 | -1.068806798 | 0.048 | 0.331 | 3.08E-33 | 10 |
| VMP1.6      | 1.35E-37 | -0.793783299 | 0.042 | 0.33  | 3.09E-33 | 10 |
| MYH9.6      | 1.47E-37 | -0.723455288 | 0.038 | 0.321 | 3.38E-33 | 10 |
| TSC22D3.7   | 1.70E-37 | -0.768252753 | 0.412 | 0.794 | 3.90E-33 | 10 |
| HSPB1.8     | 2.22E-37 | 1.482124958  | 0.574 | 0.429 | 5.11E-33 | 10 |
| SF3B1.3     | 2.79E-37 | -0.729427168 | 0.046 | 0.336 | 6.41E-33 | 10 |
| TXN.7       | 3.53E-37 | 2.430725141  | 0.512 | 0.384 | 8.11E-33 | 10 |
| IL7R.8      | 3.85E-37 | -1.872706217 | 0.04  | 0.313 | 8.84E-33 | 10 |
| CTSC.8      | 1.11E-36 | -0.628229577 | 0.062 | 0.357 | 2.54E-32 | 10 |
| SF1.6       | 1.65E-36 | -0.629442773 | 0.04  | 0.321 | 3.79E-32 | 10 |
| RPL31.7     | 3.18E-36 | 0.720609835  | 0.837 | 0.909 | 7.30E-32 | 10 |
| MYCBP2.4    | 3.62E-36 | -0.904375497 | 0.012 | 0.267 | 8.32E-32 | 10 |
| FOXP1.5     | 4.16E-36 | -1.074135175 | 0.012 | 0.267 | 9.55E-32 | 10 |
| SRRM2.4     | 4.69E-36 | -0.555095896 | 0.064 | 0.351 | 1.08E-31 | 10 |
| LITAF.7     | 7.54E-36 | -0.650403024 | 0.08  | 0.378 | 1.73E-31 | 10 |
| CARD16.5    | 1.01E-35 | -0.855253929 | 0.052 | 0.327 | 2.33E-31 | 10 |
| ATM.6       | 1.43E-35 | -0.906360652 | 0.008 | 0.258 | 3.28E-31 | 10 |
| RPL36.8     | 1.89E-35 | 0.727730162  | 0.841 | 0.915 | 4.35E-31 | 10 |
| NR4A2.7     | 1.93E-35 | -1.191621782 | 0.026 | 0.286 | 4.42E-31 | 10 |
| ANKRD44.7   | 3.13E-35 | -0.917742252 | 0.014 | 0.267 | 7.19E-31 | 10 |
| HLA-DQB1.8  | 3.22E-35 | -1.147125088 | 0.108 | 0.403 | 7.40E-31 | 10 |
| PRKCH.7     | 4.49E-35 | -0.975477042 | 0.012 | 0.262 | 1.03E-30 | 10 |
| PPP1R12A.5  | 4.61E-35 | -0.666556774 | 0.026 | 0.288 | 1.06E-30 | 10 |
| IFITM2.7    | 6.30E-35 | -0.634895149 | 0.157 | 0.487 | 1.45E-30 | 10 |
| APOBEC3G.8  | 6.46E-35 | -0.996969143 | 0.022 | 0.281 | 1.48E-30 | 10 |
| MACF1.6     | 8.56E-35 | -0.940039027 | 0.016 | 0.266 | 1.97E-30 | 10 |
| DEK.3       | 1.08E-34 | -0.544056992 | 0.082 | 0.375 | 2.47E-30 | 10 |
| RPS15.6     | 1.16E-34 | 0.597911125  | 0.898 | 0.933 | 2.66E-30 | 10 |
| IER2.5      | 2.28E-34 | -0.582195747 | 0.102 | 0.412 | 5.25E-30 | 10 |
| ODF2L.5     | 4.06E-34 | -1.078772323 | 0.02  | 0.268 | 9.33E-30 | 10 |

|             |          |              |       |       |          |    |
|-------------|----------|--------------|-------|-------|----------|----|
| AKNA.7      | 4.97E-34 | -0.892909612 | 0.02  | 0.27  | 1.14E-29 | 10 |
| CD27.9      | 5.79E-34 | -1.206768916 | 0.024 | 0.276 | 1.33E-29 | 10 |
| IL10RA.7    | 5.83E-34 | -0.92517284  | 0.02  | 0.267 | 1.34E-29 | 10 |
| CD74.8      | 8.13E-34 | -1.406354133 | 0.504 | 0.805 | 1.87E-29 | 10 |
| NACA.3      | 8.79E-34 | 0.948248709  | 0.717 | 0.807 | 2.02E-29 | 10 |
| ACTR3.3     | 9.21E-34 | -0.551505298 | 0.098 | 0.392 | 2.12E-29 | 10 |
| RGCC.9      | 9.78E-34 | -1.223761161 | 0.05  | 0.317 | 2.25E-29 | 10 |
| TAPBP.6     | 1.14E-33 | -0.51397596  | 0.058 | 0.335 | 2.62E-29 | 10 |
| IKZF1.9     | 1.58E-33 | -0.953796527 | 0.012 | 0.252 | 3.63E-29 | 10 |
| EPC1.8      | 1.91E-33 | -0.785354054 | 0.028 | 0.279 | 4.39E-29 | 10 |
| SFPQ.4      | 2.43E-33 | -0.533122515 | 0.05  | 0.321 | 5.59E-29 | 10 |
| CMC1.8      | 2.75E-33 | -1.401020964 | 0.038 | 0.294 | 6.31E-29 | 10 |
| BIN2.7      | 3.37E-33 | -1.005885522 | 0.016 | 0.258 | 7.75E-29 | 10 |
| RNF19A.9    | 4.20E-33 | -1.044844661 | 0.034 | 0.286 | 9.66E-29 | 10 |
| RCSD1.7     | 4.43E-33 | -0.816603651 | 0.016 | 0.258 | 1.02E-28 | 10 |
| PDK4.4      | 4.44E-33 | 1.849618426  | 0.371 | 0.197 | 1.02E-28 | 10 |
| MGEA5.7     | 4.56E-33 | -0.628062326 | 0.024 | 0.274 | 1.05E-28 | 10 |
| NFKBIA.8    | 4.82E-33 | -0.643199371 | 0.227 | 0.57  | 1.11E-28 | 10 |
| GABPB1.6    | 4.98E-33 | -0.776688572 | 0.036 | 0.289 | 1.14E-28 | 10 |
| PTP4A2.5    | 7.14E-33 | -0.848901746 | 0.03  | 0.28  | 1.64E-28 | 10 |
| GSTP1.5     | 9.18E-33 | 1.669868827  | 0.56  | 0.486 | 2.11E-28 | 10 |
| TLN1.3      | 1.36E-32 | -0.582996729 | 0.026 | 0.274 | 3.13E-28 | 10 |
| LINC00152.6 | 1.55E-32 | -0.830156971 | 0.062 | 0.326 | 3.57E-28 | 10 |
| ABRACL.3    | 2.13E-32 | -0.646630409 | 0.042 | 0.295 | 4.90E-28 | 10 |
| S100A6.5    | 3.16E-32 | -0.674919468 | 0.404 | 0.78  | 7.26E-28 | 10 |
| YPEL5.8     | 3.81E-32 | -0.566260157 | 0.078 | 0.354 | 8.75E-28 | 10 |
| HSP90AA1.6  | 4.74E-32 | -0.615533841 | 0.297 | 0.667 | 1.09E-27 | 10 |
| SLC2A3.5    | 5.82E-32 | -1.083675313 | 0.03  | 0.273 | 1.34E-27 | 10 |
| CD96.10     | 5.96E-32 | -0.884146414 | 0.02  | 0.257 | 1.37E-27 | 10 |
| PSMA3-AS1.8 | 7.25E-32 | -0.727297593 | 0.036 | 0.284 | 1.67E-27 | 10 |
| TAOK3.5     | 8.02E-32 | -0.617408416 | 0.03  | 0.274 | 1.84E-27 | 10 |
| HLA-DQA1.7  | 9.41E-32 | -1.557966319 | 0.092 | 0.353 | 2.16E-27 | 10 |
| PYCARD.6    | 1.45E-31 | -0.721524035 | 0.018 | 0.255 | 3.33E-27 | 10 |
| ICAM3.9     | 1.57E-31 | -0.800316843 | 0.036 | 0.281 | 3.61E-27 | 10 |
| PNN.6       | 2.02E-31 | -0.60238472  | 0.054 | 0.313 | 4.65E-27 | 10 |
| ARHGEF1.9   | 2.28E-31 | -0.663070127 | 0.028 | 0.271 | 5.24E-27 | 10 |
| HP1BP3.4    | 2.45E-31 | -0.626833817 | 0.044 | 0.294 | 5.63E-27 | 10 |
| CCNH.7      | 2.68E-31 | -0.79862648  | 0.044 | 0.293 | 6.15E-27 | 10 |
| IFNGR1.7    | 3.40E-31 | -0.900796743 | 0.028 | 0.267 | 7.82E-27 | 10 |
| WNK1.6      | 3.42E-31 | -0.662927443 | 0.022 | 0.257 | 7.86E-27 | 10 |
| ORMDL1.1    | 7.94E-31 | -0.773541543 | 0.026 | 0.262 | 1.82E-26 | 10 |
| CDC42SE2.5  | 9.34E-31 | -0.717638034 | 0.066 | 0.324 | 2.15E-26 | 10 |
| C10orf54.7  | 9.38E-31 | -0.607329664 | 0.042 | 0.29  | 2.16E-26 | 10 |
| JMJD1C.3    | 1.24E-30 | -0.74922575  | 0.03  | 0.266 | 2.86E-26 | 10 |
| USP15.3     | 3.09E-30 | -0.598236956 | 0.034 | 0.271 | 7.09E-26 | 10 |
| TRAF3IP3.10 | 4.89E-30 | -0.649872339 | 0.03  | 0.264 | 1.12E-25 | 10 |
| RNPS1.4     | 6.12E-30 | -0.710414309 | 0.034 | 0.27  | 1.41E-25 | 10 |
| TRIM22.5    | 6.54E-30 | -0.615926893 | 0.026 | 0.256 | 1.50E-25 | 10 |
| RPL35.4     | 7.74E-30 | 0.669066444  | 0.801 | 0.901 | 1.78E-25 | 10 |
| TYROBP.10   | 8.13E-30 | -1.30268026  | 0.135 | 0.397 | 1.87E-25 | 10 |
| VIM.8       | 9.87E-30 | 0.989696461  | 0.739 | 0.772 | 2.27E-25 | 10 |
| PSMB10.3    | 2.83E-29 | -0.693289944 | 0.026 | 0.254 | 6.51E-25 | 10 |
| BTN3A2.7    | 5.16E-29 | -0.773988122 | 0.04  | 0.271 | 1.18E-24 | 10 |
| RPL11.2     | 7.43E-29 | 0.515130206  | 0.88  | 0.94  | 1.71E-24 | 10 |
| S100A10.4   | 7.80E-29 | 1.230151717  | 0.637 | 0.609 | 1.79E-24 | 10 |
| PKM.5       | 1.41E-28 | 1.744859722  | 0.518 | 0.43  | 3.24E-24 | 10 |
| TUBA1A.2    | 2.41E-28 | -0.540663663 | 0.088 | 0.347 | 5.55E-24 | 10 |
| FCER1G.10   | 3.26E-28 | -1.191105355 | 0.07  | 0.312 | 7.48E-24 | 10 |

|            |          |              |       |       |             |    |
|------------|----------|--------------|-------|-------|-------------|----|
| RPS5.4     | 1.39E-27 | 0.70951683   | 0.753 | 0.845 | 3.20E-23    | 10 |
| BRD2.5     | 1.81E-27 | -0.644777529 | 0.034 | 0.255 | 4.16E-23    | 10 |
| DDX6.7     | 3.10E-27 | -0.690547309 | 0.036 | 0.254 | 7.13E-23    | 10 |
| CASP4.3    | 3.71E-27 | -0.524200822 | 0.062 | 0.298 | 8.52E-23    | 10 |
| C9orf142.7 | 3.89E-27 | -0.605083191 | 0.044 | 0.269 | 8.94E-23    | 10 |
| HNRNPH1.3  | 6.07E-27 | -0.590607311 | 0.08  | 0.329 | 1.39E-22    | 10 |
| SEPT9.7    | 7.12E-27 | -0.552965503 | 0.038 | 0.258 | 1.64E-22    | 10 |
| NDUFC1.8   | 9.21E-27 | 1.890690342  | 0.402 | 0.266 | 2.12E-22    | 10 |
| RPL37.4    | 9.63E-27 | 0.61321549   | 0.839 | 0.911 | 2.21E-22    | 10 |
| RPL8.2     | 9.76E-27 | 0.654198093  | 0.781 | 0.886 | 2.24E-22    | 10 |
| RHOG.4     | 2.22E-25 | -0.578774497 | 0.054 | 0.272 | 5.10E-21    | 10 |
| PLP2.5     | 5.34E-25 | -0.502479906 | 0.072 | 0.303 | 1.23E-20    | 10 |
| GYPC.7     | 1.07E-24 | -0.552837878 | 0.084 | 0.315 | 2.45E-20    | 10 |
| RPL26.3    | 1.07E-24 | 0.52974089   | 0.865 | 0.938 | 2.46E-20    | 10 |
| FYN.6      | 1.56E-24 | -0.535924356 | 0.056 | 0.273 | 3.58E-20    | 10 |
| AES.4      | 1.71E-24 | -0.55046903  | 0.048 | 0.259 | 3.94E-20    | 10 |
| PSAP.9     | 5.05E-24 | -0.545083163 | 0.203 | 0.478 | 1.16E-19    | 10 |
| BIRC3.8    | 1.05E-23 | -0.884563849 | 0.066 | 0.28  | 2.42E-19    | 10 |
| TPM1.1     | 6.38E-23 | 1.339801408  | 0.335 | 0.189 | 1.47E-18    | 10 |
| RPL19.4    | 7.04E-23 | 0.50271715   | 0.867 | 0.927 | 1.62E-18    | 10 |
| HLA-DMA.8  | 2.79E-22 | -0.505101396 | 0.082 | 0.295 | 6.42E-18    | 10 |
| GPX4.8     | 8.31E-21 | 1.622552823  | 0.496 | 0.452 | 1.91E-16    | 10 |
| RHOB.8     | 3.83E-19 | 1.284674195  | 0.454 | 0.345 | 8.81E-15    | 10 |
| RPS25.6    | 4.10E-19 | 0.517777729  | 0.835 | 0.921 | 9.43E-15    | 10 |
| SAT1.8     | 3.36E-18 | -0.627810985 | 0.365 | 0.641 | 7.72E-14    | 10 |
| AIF1.10    | 1.12E-17 | -0.769903177 | 0.084 | 0.266 | 2.58E-13    | 10 |
| HLA-DRB5.9 | 1.84E-17 | -0.874080815 | 0.175 | 0.381 | 4.23E-13    | 10 |
| GNLY.10    | 2.16E-16 | -1.845069039 | 0.092 | 0.259 | 4.96E-12    | 10 |
| ESD.1      | 2.27E-16 | 1.735802844  | 0.329 | 0.232 | 5.21E-12    | 10 |
| SERPINA1.9 | 3.50E-16 | 1.734981331  | 0.376 | 0.275 | 8.04E-12    | 10 |
| LYZ.9      | 8.26E-16 | -1.419180488 | 0.175 | 0.358 | 1.90E-11    | 10 |
| NPM1.4     | 1.09E-15 | 1.159502178  | 0.598 | 0.702 | 2.51E-11    | 10 |
| HLA-DRA.10 | 2.02E-15 | -1.380769458 | 0.45  | 0.681 | 4.64E-11    | 10 |
| RPS7.6     | 2.42E-15 | 0.512171241  | 0.779 | 0.889 | 5.55E-11    | 10 |
| C1QA.10    | 3.03E-15 | -0.999819361 | 0.092 | 0.256 | 6.96E-11    | 10 |
| RPL22.4    | 3.41E-15 | 0.729138397  | 0.667 | 0.816 | 7.83E-11    | 10 |
| HBB.6      | 5.45E-15 | -0.928680645 | 0.183 | 0.399 | 1.25E-10    | 10 |
| OCIAD2.7   | 6.68E-15 | 1.510116339  | 0.347 | 0.258 | 1.53E-10    | 10 |
| ACAA2      | 5.64E-14 | 1.668554806  | 0.255 | 0.16  | 1.30E-09    | 10 |
| RPL5.3     | 5.86E-14 | 0.577141368  | 0.729 | 0.857 | 1.35E-09    | 10 |
| RPL24.5    | 2.34E-13 | 0.629098265  | 0.681 | 0.859 | 5.38E-09    | 10 |
| RPL38.4    | 5.87E-13 | 0.52543795   | 0.763 | 0.871 | 1.35E-08    | 10 |
| GPX3.1     | 1.51E-12 | 1.656350287  | 0.255 | 0.162 | 3.47E-08    | 10 |
| CST3.9     | 5.57E-12 | -0.76930429  | 0.229 | 0.391 | 1.28E-07    | 10 |
| UQCRB.1    | 9.38E-12 | 1.011804302  | 0.608 | 0.749 | 2.16E-07    | 10 |
| HBA2.8     | 1.29E-11 | -0.998170003 | 0.108 | 0.256 | 2.96E-07    | 10 |
| RPS11.4    | 2.10E-11 | 0.50342613   | 0.699 | 0.861 | 4.82E-07    | 10 |
| PPDPF.6    | 2.76E-11 | 1.162642108  | 0.558 | 0.663 | 6.34E-07    | 10 |
| RPL23.3    | 3.00E-11 | 0.625472613  | 0.655 | 0.823 | 6.90E-07    | 10 |
| UBC.4      | 5.20E-11 | 0.764222204  | 0.697 | 0.845 | 1.20E-06    | 10 |
| TMEM59.2   | 2.19E-10 | 0.505144124  | 0.251 | 0.485 | 5.04E-06    | 10 |
| LAMTOR5.6  | 1.34E-09 | 1.620760214  | 0.378 | 0.344 | 3.09E-05    | 10 |
| RPL36A.5   | 3.73E-09 | 0.691856765  | 0.649 | 0.807 | 8.57E-05    | 10 |
| GNB2L1.1   | 6.55E-09 | 0.644950131  | 0.683 | 0.841 | 0.000150427 | 10 |
| TMBIM6.2   | 7.18E-09 | 0.60258382   | 0.271 | 0.503 | 0.00016507  | 10 |
| UQCRCQ.7   | 9.49E-09 | 1.481856313  | 0.442 | 0.462 | 0.000218178 | 10 |
| PRDX1.5    | 1.22E-08 | 1.235920493  | 0.418 | 0.403 | 0.000279541 | 10 |
| PFDN5.2    | 1.25E-08 | 0.713875062  | 0.616 | 0.79  | 0.000287066 | 10 |



|            |          |              |       |       |             |    |
|------------|----------|--------------|-------|-------|-------------|----|
| USMG5.4    | 2.26E-08 | 1.376585843  | 0.474 | 0.53  | 0.000518314 | 10 |
| DSTN.8     | 3.15E-08 | 1.139799257  | 0.357 | 0.306 | 0.000724284 | 10 |
| PRDX6.4    | 4.20E-08 | 1.458237429  | 0.353 | 0.324 | 0.00096554  | 10 |
| SPP1.5     | 5.93E-08 | 0.565541949  | 0.289 | 0.214 | 0.001362071 | 10 |
| MPC2.6     | 8.94E-08 | 1.442443474  | 0.309 | 0.263 | 0.002055409 | 10 |
| OCIAD1.2   | 1.06E-07 | 0.518036952  | 0.139 | 0.274 | 0.002443429 | 10 |
| IGKC.7     | 1.63E-07 | -2.342822028 | 0.159 | 0.301 | 0.003756354 | 10 |
| CUTA.4     | 2.18E-07 | 0.549951793  | 0.235 | 0.423 | 0.00499926  | 10 |
| CNDP2.1    | 3.29E-07 | 1.532127063  | 0.263 | 0.211 | 0.007562491 | 10 |
| COX17.4    | 3.48E-07 | 0.510807044  | 0.173 | 0.323 | 0.008001007 | 10 |
| S100A9.9   | 3.71E-07 | -1.21451615  | 0.143 | 0.255 | 0.008521403 | 10 |
| PSMA4.2    | 3.83E-07 | 0.651092882  | 0.179 | 0.33  | 0.008801003 | 10 |
| ATOX1.2    | 4.52E-07 | 1.506758984  | 0.273 | 0.222 | 0.010390305 | 10 |
| ST13.6     | 5.11E-07 | 1.42890823   | 0.376 | 0.372 | 0.01174312  | 10 |
| PGAM1.5    | 5.90E-07 | 1.497503751  | 0.371 | 0.36  | 0.013549481 | 10 |
| CHCHD10.8  | 8.27E-07 | 1.414504421  | 0.287 | 0.245 | 0.019006718 | 10 |
| SEC62.8    | 1.04E-06 | 0.620691655  | 0.247 | 0.432 | 0.023832278 | 10 |
| APOC1.8    | 1.05E-06 | -0.635208773 | 0.173 | 0.288 | 0.024201672 | 10 |
| C19orf53.1 | 1.21E-06 | 0.52595579   | 0.225 | 0.394 | 0.027785988 | 10 |
| ZNHIT1.2   | 1.22E-06 | 0.521458279  | 0.155 | 0.287 | 0.028098227 | 10 |
| SLC25A5.4  | 1.23E-06 | 0.511074836  | 0.221 | 0.392 | 0.028215925 | 10 |
| NDUFB9.1   | 1.28E-06 | 0.601010389  | 0.187 | 0.338 | 0.029383559 | 10 |
| COX7A2L    | 1.31E-06 | 0.551764275  | 0.185 | 0.336 | 0.030134574 | 10 |
| PSMB6.1    | 1.76E-06 | 0.596564632  | 0.155 | 0.282 | 0.040442935 | 10 |
| ENPP2.2    | 0        | 4.185240006  | 0.889 | 0.1   | 0           | 11 |
| SPARCL1.2  | 0        | 4.113805923  | 0.987 | 0.136 | 0           | 11 |
| FLT1.1     | 0        | 4.055228066  | 0.942 | 0.042 | 0           | 11 |
| ESM1.1     | 0        | 3.83673901   | 0.96  | 0.097 | 0           | 11 |
| INSR.3     | 0        | 3.745767832  | 0.956 | 0.109 | 0           | 11 |
| PLVAP.1    | 0        | 3.55681695   | 0.965 | 0.067 | 0           | 11 |
| TIMP3.1    | 0        | 3.554019479  | 0.933 | 0.066 | 0           | 11 |
| SPARC.2    | 0        | 3.408221015  | 0.989 | 0.156 | 0           | 11 |
| A2M.2      | 0        | 3.335794759  | 0.945 | 0.171 | 0           | 11 |
| IGFBP3.10  | 0        | 3.242626405  | 0.889 | 0.223 | 0           | 11 |
| VWF        | 0        | 3.211145213  | 0.911 | 0.061 | 0           | 11 |
| GSN.4      | 0        | 3.17353076   | 0.971 | 0.2   | 0           | 11 |
| EPAS1.1    | 0        | 3.17069619   | 0.936 | 0.088 | 0           | 11 |
| PLPP1.1    | 0        | 3.156091258  | 0.931 | 0.07  | 0           | 11 |
| STC1       | 0        | 3.117279786  | 0.796 | 0.046 | 0           | 11 |
| NOTCH4     | 0        | 3.108152969  | 0.92  | 0.033 | 0           | 11 |
| IGFBP7.10  | 0        | 3.091457973  | 0.998 | 0.358 | 0           | 11 |
| PRSS23.1   | 0        | 3.054908088  | 0.909 | 0.088 | 0           | 11 |
| ADGRL4.1   | 0        | 3.013016306  | 0.925 | 0.027 | 0           | 11 |
| CLEC14A.1  | 0        | 3.010740472  | 0.894 | 0.029 | 0           | 11 |
| PECAM1.3   | 0        | 2.978452959  | 0.96  | 0.175 | 0           | 11 |
| EDNRB      | 0        | 2.97383817   | 0.845 | 0.037 | 0           | 11 |
| HSPG2      | 0        | 2.97169207   | 0.84  | 0.037 | 0           | 11 |
| COL4A1     | 0        | 2.926259443  | 0.765 | 0.046 | 0           | 11 |
| APP.3      | 0        | 2.873451087  | 0.945 | 0.153 | 0           | 11 |
| SPRY1.1    | 0        | 2.777939994  | 0.86  | 0.087 | 0           | 11 |
| RBP7.1     | 0        | 2.765710352  | 0.758 | 0.058 | 0           | 11 |
| SDPR.1     | 0        | 2.76309349   | 0.829 | 0.055 | 0           | 11 |
| PLPP3      | 0        | 2.755658513  | 0.747 | 0.039 | 0           | 11 |
| CD59.4     | 0        | 2.717384684  | 0.971 | 0.208 | 0           | 11 |
| BTNL9      | 0        | 2.679735574  | 0.756 | 0.02  | 0           | 11 |
| MGP.2      | 0        | 2.669689047  | 0.878 | 0.126 | 0           | 11 |
| RNASE1.1   | 0        | 2.64809429   | 0.867 | 0.067 | 0           | 11 |
| INHBB      | 0        | 2.630217319  | 0.723 | 0.012 | 0           | 11 |

|            |   |             |       |       |   |    |
|------------|---|-------------|-------|-------|---|----|
| SLC9A3R2.1 | 0 | 2.619608574 | 0.814 | 0.041 | 0 | 11 |
| AQP1       | 0 | 2.611881123 | 0.667 | 0.04  | 0 | 11 |
| RAMP2.1    | 0 | 2.604209922 | 0.863 | 0.04  | 0 | 11 |
| TCF4.1     | 0 | 2.601686351 | 0.847 | 0.095 | 0 | 11 |
| GNG11.1    | 0 | 2.598633494 | 0.92  | 0.118 | 0 | 11 |
| ENG.1      | 0 | 2.551978587 | 0.816 | 0.084 | 0 | 11 |
| EFNB2      | 0 | 2.5459659   | 0.716 | 0.013 | 0 | 11 |
| ANGPT2     | 0 | 2.519264017 | 0.701 | 0.051 | 0 | 11 |
| CLDN5      | 0 | 2.49594077  | 0.534 | 0.026 | 0 | 11 |
| TSC22D1.2  | 0 | 2.489428729 | 0.911 | 0.159 | 0 | 11 |
| IFI27.1    | 0 | 2.472192603 | 0.925 | 0.129 | 0 | 11 |
| ADGRF5     | 0 | 2.463596974 | 0.741 | 0.021 | 0 | 11 |
| ITGA6      | 0 | 2.445334951 | 0.747 | 0.049 | 0 | 11 |
| ARHGAP29   | 0 | 2.431245423 | 0.843 | 0.044 | 0 | 11 |
| SPTBN1     | 0 | 2.403075075 | 0.834 | 0.079 | 0 | 11 |
| COL4A2     | 0 | 2.367834151 | 0.696 | 0.042 | 0 | 11 |
| PODXL      | 0 | 2.343564217 | 0.667 | 0.015 | 0 | 11 |
| HES1.1     | 0 | 2.339954469 | 0.65  | 0.066 | 0 | 11 |
| BCAM       | 0 | 2.325001022 | 0.772 | 0.043 | 0 | 11 |
| PTPRB      | 0 | 2.31273466  | 0.683 | 0.016 | 0 | 11 |
| FAM84A     | 0 | 2.311229053 | 0.659 | 0.017 | 0 | 11 |
| EGFL7      | 0 | 2.254318843 | 0.765 | 0.03  | 0 | 11 |
| ESAM       | 0 | 2.215030846 | 0.778 | 0.04  | 0 | 11 |
| NFIB       | 0 | 2.21248297  | 0.78  | 0.049 | 0 | 11 |
| GJA1       | 0 | 2.201174841 | 0.667 | 0.013 | 0 | 11 |
| HYAL2      | 0 | 2.198712927 | 0.736 | 0.049 | 0 | 11 |
| LIFR       | 0 | 2.195877139 | 0.67  | 0.023 | 0 | 11 |
| PDGFD      | 0 | 2.178606632 | 0.743 | 0.029 | 0 | 11 |
| RAMP3      | 0 | 2.158192976 | 0.678 | 0.03  | 0 | 11 |
| F8         | 0 | 2.158061102 | 0.588 | 0.026 | 0 | 11 |
| CALCRL     | 0 | 2.141969207 | 0.705 | 0.025 | 0 | 11 |
| SEC14L1.1  | 0 | 2.133803669 | 0.827 | 0.167 | 0 | 11 |
| TM4SF1     | 0 | 2.122311128 | 0.647 | 0.042 | 0 | 11 |
| CDH13      | 0 | 2.063756624 | 0.627 | 0.017 | 0 | 11 |
| APOLD1     | 0 | 2.063033426 | 0.729 | 0.081 | 0 | 11 |
| KCNE3      | 0 | 2.033589027 | 0.568 | 0.037 | 0 | 11 |
| CD93.1     | 0 | 2.022469325 | 0.652 | 0.066 | 0 | 11 |
| CRIP2.1    | 0 | 2.001357977 | 0.765 | 0.08  | 0 | 11 |
| EMCN       | 0 | 1.975776051 | 0.594 | 0.019 | 0 | 11 |
| GRB10      | 0 | 1.974883253 | 0.634 | 0.017 | 0 | 11 |
| EMP1       | 0 | 1.966192112 | 0.599 | 0.025 | 0 | 11 |
| TMEM204    | 0 | 1.963396801 | 0.754 | 0.058 | 0 | 11 |
| LDB2       | 0 | 1.95084653  | 0.701 | 0.029 | 0 | 11 |
| FSTL1      | 0 | 1.936095892 | 0.645 | 0.031 | 0 | 11 |
| PCAT19     | 0 | 1.924464678 | 0.656 | 0.024 | 0 | 11 |
| CD34       | 0 | 1.921926485 | 0.652 | 0.021 | 0 | 11 |
| ITGA1      | 0 | 1.914611566 | 0.723 | 0.097 | 0 | 11 |
| EFNA1      | 0 | 1.912330721 | 0.718 | 0.047 | 0 | 11 |
| NRP1       | 0 | 1.884070823 | 0.665 | 0.052 | 0 | 11 |
| CDH5       | 0 | 1.8767691   | 0.605 | 0.012 | 0 | 11 |
| FCN3       | 0 | 1.855251159 | 0.353 | 0.005 | 0 | 11 |
| TMEM88     | 0 | 1.851872828 | 0.61  | 0.022 | 0 | 11 |
| UACA       | 0 | 1.851359664 | 0.619 | 0.052 | 0 | 11 |
| KDR        | 0 | 1.838464593 | 0.517 | 0.006 | 0 | 11 |
| VWA1       | 0 | 1.832473263 | 0.543 | 0.014 | 0 | 11 |
| CA2        | 0 | 1.829398312 | 0.554 | 0.038 | 0 | 11 |
| MMRN2      | 0 | 1.805860711 | 0.61  | 0.012 | 0 | 11 |
| F2RL3      | 0 | 1.804801651 | 0.508 | 0.008 | 0 | 11 |

|          |   |             |       |       |   |    |
|----------|---|-------------|-------|-------|---|----|
| ID3.1    | 0 | 1.800681487 | 0.769 | 0.119 | 0 | 11 |
| WWTR1    | 0 | 1.78421892  | 0.623 | 0.038 | 0 | 11 |
| DOCK9    | 0 | 1.782513727 | 0.625 | 0.027 | 0 | 11 |
| S1PR1    | 0 | 1.771395119 | 0.616 | 0.029 | 0 | 11 |
| CAV1.2   | 0 | 1.761834776 | 0.812 | 0.115 | 0 | 11 |
| PTRF     | 0 | 1.749890897 | 0.701 | 0.061 | 0 | 11 |
| OSBPL1A  | 0 | 1.748819854 | 0.581 | 0.058 | 0 | 11 |
| FILIP1   | 0 | 1.747761534 | 0.561 | 0.021 | 0 | 11 |
| MTUS1    | 0 | 1.730223461 | 0.583 | 0.042 | 0 | 11 |
| CX3CL1   | 0 | 1.726768504 | 0.521 | 0.013 | 0 | 11 |
| TSPAN13  | 0 | 1.720378722 | 0.583 | 0.016 | 0 | 11 |
| SMTN     | 0 | 1.709319845 | 0.568 | 0.028 | 0 | 11 |
| IGFBP4   | 0 | 1.705045592 | 0.745 | 0.097 | 0 | 11 |
| SORBS2   | 0 | 1.698903502 | 0.574 | 0.029 | 0 | 11 |
| DLL4     | 0 | 1.691909557 | 0.554 | 0.007 | 0 | 11 |
| HTRA1.1  | 0 | 1.691867577 | 0.636 | 0.092 | 0 | 11 |
| CRIM1    | 0 | 1.680263525 | 0.599 | 0.063 | 0 | 11 |
| COL8A1   | 0 | 1.665330301 | 0.554 | 0.019 | 0 | 11 |
| MAGI1    | 0 | 1.661434616 | 0.532 | 0.011 | 0 | 11 |
| NTN4     | 0 | 1.65512044  | 0.492 | 0.016 | 0 | 11 |
| LAMC1    | 0 | 1.644210819 | 0.572 | 0.023 | 0 | 11 |
| JAG1     | 0 | 1.62643909  | 0.53  | 0.032 | 0 | 11 |
| COL15A1  | 0 | 1.620934748 | 0.375 | 0.006 | 0 | 11 |
| TMEM47   | 0 | 1.619060401 | 0.583 | 0.027 | 0 | 11 |
| TSPAN7   | 0 | 1.618658667 | 0.51  | 0.017 | 0 | 11 |
| SLCO2A1  | 0 | 1.59155818  | 0.424 | 0.013 | 0 | 11 |
| IDO1     | 0 | 1.583001508 | 0.388 | 0.017 | 0 | 11 |
| RAPGEF5  | 0 | 1.580243597 | 0.528 | 0.018 | 0 | 11 |
| NPDC1    | 0 | 1.570323929 | 0.603 | 0.044 | 0 | 11 |
| TMEM150C | 0 | 1.567784321 | 0.494 | 0.009 | 0 | 11 |
| CNN3.1   | 0 | 1.543996253 | 0.721 | 0.087 | 0 | 11 |
| PINK1    | 0 | 1.535047281 | 0.572 | 0.042 | 0 | 11 |
| UNC5B    | 0 | 1.523008306 | 0.481 | 0.013 | 0 | 11 |
| TJP1     | 0 | 1.515745037 | 0.53  | 0.022 | 0 | 11 |
| MYO6     | 0 | 1.510559734 | 0.568 | 0.04  | 0 | 11 |
| CYYR1    | 0 | 1.501195961 | 0.517 | 0.013 | 0 | 11 |
| S100A16  | 0 | 1.499804049 | 0.643 | 0.063 | 0 | 11 |
| PALMD    | 0 | 1.480022102 | 0.512 | 0.015 | 0 | 11 |
| TM4SF18  | 0 | 1.471440827 | 0.466 | 0.022 | 0 | 11 |
| TMTC1    | 0 | 1.466257922 | 0.443 | 0.011 | 0 | 11 |
| LAMA4    | 0 | 1.4544792   | 0.506 | 0.019 | 0 | 11 |
| PLXND1   | 0 | 1.452442539 | 0.525 | 0.048 | 0 | 11 |
| PPFIBP1  | 0 | 1.448388675 | 0.545 | 0.038 | 0 | 11 |
| PTPRK    | 0 | 1.445227026 | 0.488 | 0.021 | 0 | 11 |
| FAM167B  | 0 | 1.442264422 | 0.448 | 0.021 | 0 | 11 |
| PLK2     | 0 | 1.437213905 | 0.499 | 0.045 | 0 | 11 |
| NOSTRIN  | 0 | 1.43268869  | 0.47  | 0.021 | 0 | 11 |
| COX7A1   | 0 | 1.431529715 | 0.61  | 0.05  | 0 | 11 |
| TIE1     | 0 | 1.406740809 | 0.477 | 0.011 | 0 | 11 |
| CXorf36  | 0 | 1.401565718 | 0.506 | 0.016 | 0 | 11 |
| ANKRD26  | 0 | 1.397919337 | 0.517 | 0.054 | 0 | 11 |
| THSD7A   | 0 | 1.394301912 | 0.399 | 0.01  | 0 | 11 |
| FZD4     | 0 | 1.377246881 | 0.446 | 0.011 | 0 | 11 |
| SULF1    | 0 | 1.360044842 | 0.344 | 0.012 | 0 | 11 |
| NID1     | 0 | 1.353599635 | 0.455 | 0.017 | 0 | 11 |
| GAS6     | 0 | 1.350380636 | 0.525 | 0.06  | 0 | 11 |
| HEY1     | 0 | 1.342818015 | 0.437 | 0.009 | 0 | 11 |
| TNS2     | 0 | 1.339742426 | 0.497 | 0.027 | 0 | 11 |

|          |   |             |       |       |   |    |
|----------|---|-------------|-------|-------|---|----|
| DOCK6    | 0 | 1.303635154 | 0.459 | 0.014 | 0 | 11 |
| LIMCH1   | 0 | 1.294145652 | 0.421 | 0.018 | 0 | 11 |
| DKK3     | 0 | 1.280763295 | 0.494 | 0.036 | 0 | 11 |
| ECSCR    | 0 | 1.280249884 | 0.683 | 0.024 | 0 | 11 |
| MATN2    | 0 | 1.267604963 | 0.37  | 0.01  | 0 | 11 |
| ARL15    | 0 | 1.258676832 | 0.461 | 0.032 | 0 | 11 |
| RPS6KA2  | 0 | 1.256100964 | 0.452 | 0.021 | 0 | 11 |
| PTPRG    | 0 | 1.254660995 | 0.406 | 0.021 | 0 | 11 |
| EMP2     | 0 | 1.245145315 | 0.466 | 0.027 | 0 | 11 |
| ROBO4    | 0 | 1.235567277 | 0.415 | 0.009 | 0 | 11 |
| FAM107A  | 0 | 1.233701825 | 0.397 | 0.011 | 0 | 11 |
| KCNN3    | 0 | 1.231383747 | 0.399 | 0.007 | 0 | 11 |
| HES4     | 0 | 1.223958637 | 0.446 | 0.033 | 0 | 11 |
| FGFR1    | 0 | 1.222994247 | 0.424 | 0.027 | 0 | 11 |
| GALNT15  | 0 | 1.213987135 | 0.392 | 0.012 | 0 | 11 |
| SASH1    | 0 | 1.211816973 | 0.452 | 0.024 | 0 | 11 |
| ANGPTL2  | 0 | 1.209679894 | 0.373 | 0.01  | 0 | 11 |
| LNK1     | 0 | 1.19394033  | 0.368 | 0.009 | 0 | 11 |
| ACVRL1   | 0 | 1.177184683 | 0.435 | 0.014 | 0 | 11 |
| LAMB2    | 0 | 1.172657278 | 0.428 | 0.031 | 0 | 11 |
| ECE1     | 0 | 1.168037974 | 0.455 | 0.033 | 0 | 11 |
| MECOM    | 0 | 1.164242485 | 0.379 | 0.006 | 0 | 11 |
| MYCT1    | 0 | 1.161890405 | 0.424 | 0.007 | 0 | 11 |
| GALNT18  | 0 | 1.161845299 | 0.419 | 0.012 | 0 | 11 |
| CAV2     | 0 | 1.159125863 | 0.548 | 0.061 | 0 | 11 |
| ERG      | 0 | 1.157891366 | 0.386 | 0.008 | 0 | 11 |
| TMEM255B | 0 | 1.153702278 | 0.43  | 0.021 | 0 | 11 |
| LRRRC8A  | 0 | 1.152530063 | 0.401 | 0.024 | 0 | 11 |
| PCDH17   | 0 | 1.139187759 | 0.333 | 0.006 | 0 | 11 |
| SOX18    | 0 | 1.134152431 | 0.381 | 0.005 | 0 | 11 |
| JAG2     | 0 | 1.132997549 | 0.364 | 0.007 | 0 | 11 |
| PTPN14   | 0 | 1.130535346 | 0.384 | 0.024 | 0 | 11 |
| DYSF     | 0 | 1.10325283  | 0.37  | 0.009 | 0 | 11 |
| ITIH5    | 0 | 1.090065783 | 0.339 | 0.019 | 0 | 11 |
| NCKAP1   | 0 | 1.084250294 | 0.41  | 0.026 | 0 | 11 |
| TMEM233  | 0 | 1.083355005 | 0.346 | 0.006 | 0 | 11 |
| GPIHBP1  | 0 | 1.063556394 | 0.288 | 0.005 | 0 | 11 |
| LAMA5    | 0 | 1.055549538 | 0.355 | 0.019 | 0 | 11 |
| MPZL2    | 0 | 1.052369517 | 0.379 | 0.025 | 0 | 11 |
| PREX2    | 0 | 1.04908244  | 0.357 | 0.013 | 0 | 11 |
| RBMS3    | 0 | 1.046543628 | 0.364 | 0.018 | 0 | 11 |
| NUAK1    | 0 | 1.028348376 | 0.346 | 0.013 | 0 | 11 |
| SCARF1   | 0 | 1.024002814 | 0.359 | 0.016 | 0 | 11 |
| PXDN     | 0 | 1.012652492 | 0.306 | 0.007 | 0 | 11 |
| LAMB1    | 0 | 0.999609723 | 0.344 | 0.009 | 0 | 11 |
| IL3RA    | 0 | 0.998421802 | 0.361 | 0.012 | 0 | 11 |
| DPYSL3   | 0 | 0.991775083 | 0.313 | 0.005 | 0 | 11 |
| BTBD3    | 0 | 0.989005945 | 0.361 | 0.018 | 0 | 11 |
| RASIP1   | 0 | 0.983762194 | 0.364 | 0.009 | 0 | 11 |
| PDZD2    | 0 | 0.982731338 | 0.306 | 0.013 | 0 | 11 |
| HOXD9    | 0 | 0.966032073 | 0.324 | 0.009 | 0 | 11 |
| CMTM8    | 0 | 0.952493864 | 0.35  | 0.022 | 0 | 11 |
| MPDZ     | 0 | 0.950410038 | 0.31  | 0.009 | 0 | 11 |
| PLXNA2   | 0 | 0.94927171  | 0.33  | 0.009 | 0 | 11 |
| ACE      | 0 | 0.945956343 | 0.253 | 0.006 | 0 | 11 |
| EVA1B    | 0 | 0.936111741 | 0.361 | 0.022 | 0 | 11 |
| FOLH1    | 0 | 0.92493401  | 0.259 | 0.003 | 0 | 11 |
| IPO11    | 0 | 0.921601862 | 0.377 | 0.028 | 0 | 11 |

|          |           |             |       |       |           |    |
|----------|-----------|-------------|-------|-------|-----------|----|
| HIF3A    | 0         | 0.915760052 | 0.271 | 0.006 | 0         | 11 |
| LRRC32   | 0         | 0.91055168  | 0.275 | 0.012 | 0         | 11 |
| PLS3     | 0         | 0.908775564 | 0.361 | 0.025 | 0         | 11 |
| RAPGEF4  | 0         | 0.895536909 | 0.282 | 0.005 | 0         | 11 |
| PLEKHG1  | 0         | 0.890434867 | 0.299 | 0.011 | 0         | 11 |
| JAM3     | 0         | 0.886629521 | 0.302 | 0.007 | 0         | 11 |
| GAS2L1   | 0         | 0.884980483 | 0.33  | 0.02  | 0         | 11 |
| TANC1    | 0         | 0.884739145 | 0.322 | 0.013 | 0         | 11 |
| PIK3R3   | 0         | 0.884214565 | 0.45  | 0.023 | 0         | 11 |
| ABCG2    | 0         | 0.88319989  | 0.288 | 0.01  | 0         | 11 |
| ITGB5    | 0         | 0.88076734  | 0.31  | 0.016 | 0         | 11 |
| MYO10    | 0         | 0.87760649  | 0.313 | 0.01  | 0         | 11 |
| AFAP1L1  | 0         | 0.868245568 | 0.279 | 0.006 | 0         | 11 |
| MCF2L    | 0         | 0.865127277 | 0.31  | 0.016 | 0         | 11 |
| SHE      | 0         | 0.854671623 | 0.282 | 0.004 | 0         | 11 |
| HECW2    | 0         | 0.84985895  | 0.284 | 0.004 | 0         | 11 |
| LIMS2    | 0         | 0.848844296 | 0.33  | 0.014 | 0         | 11 |
| EML1     | 0         | 0.837153526 | 0.275 | 0.013 | 0         | 11 |
| SEMA3F   | 0         | 0.82460547  | 0.255 | 0.007 | 0         | 11 |
| FGD5     | 0         | 0.823441946 | 0.288 | 0.006 | 0         | 11 |
| RAI14    | 0         | 0.808622539 | 0.286 | 0.014 | 0         | 11 |
| BOC      | 0         | 0.806937321 | 0.271 | 0.004 | 0         | 11 |
| RAPGEF3  | 0         | 0.798790567 | 0.273 | 0.008 | 0         | 11 |
| HOXD8    | 0         | 0.775961502 | 0.302 | 0.016 | 0         | 11 |
| PLD1     | 0         | 0.772663258 | 0.286 | 0.014 | 0         | 11 |
| FLT4     | 0         | 0.763559054 | 0.257 | 0.005 | 0         | 11 |
| GPR4     | 0         | 0.725729356 | 0.264 | 0.006 | 0         | 11 |
| SPRY4    | 0         | 0.648228722 | 0.262 | 0.006 | 0         | 11 |
| COL18A1  | 1.80E-307 | 1.261928206 | 0.514 | 0.056 | 4.13E-303 | 11 |
| CDC42BPA | 1.21E-306 | 0.976346375 | 0.388 | 0.031 | 2.79E-302 | 11 |
| ZNF704   | 1.55E-306 | 0.789026226 | 0.277 | 0.014 | 3.56E-302 | 11 |
| ATOH8    | 8.77E-305 | 0.826337625 | 0.253 | 0.011 | 2.02E-300 | 11 |
| GRAMD3   | 2.37E-304 | 1.25367714  | 0.439 | 0.041 | 5.45E-300 | 11 |
| JUP      | 6.15E-301 | 1.068624255 | 0.373 | 0.029 | 1.41E-296 | 11 |
| SERPINE1 | 1.47E-297 | 1.469088687 | 0.426 | 0.039 | 3.37E-293 | 11 |
| LAYN     | 1.54E-296 | 0.943978989 | 0.346 | 0.024 | 3.54E-292 | 11 |
| ACKR3    | 6.84E-294 | 0.930085303 | 0.271 | 0.014 | 1.57E-289 | 11 |
| FNBP1L   | 4.73E-293 | 0.990245056 | 0.359 | 0.027 | 1.09E-288 | 11 |
| CALD1    | 2.76E-292 | 1.01386139  | 0.769 | 0.129 | 6.35E-288 | 11 |
| MYO1B    | 1.60E-291 | 0.935803239 | 0.333 | 0.022 | 3.67E-287 | 11 |
| FKBP9    | 2.12E-290 | 0.81461115  | 0.317 | 0.021 | 4.88E-286 | 11 |
| MCAM     | 2.34E-290 | 1.424166611 | 0.428 | 0.04  | 5.37E-286 | 11 |
| TNFRSF4  | 2.96E-288 | 1.250297124 | 0.508 | 0.057 | 6.79E-284 | 11 |
| PLLP     | 2.33E-286 | 0.877916407 | 0.302 | 0.018 | 5.36E-282 | 11 |
| PVRL2    | 2.87E-285 | 1.172627897 | 0.452 | 0.048 | 6.59E-281 | 11 |
| EHD4     | 1.72E-284 | 1.301481833 | 0.514 | 0.063 | 3.96E-280 | 11 |
| RASGRP3  | 9.18E-280 | 1.05887016  | 0.377 | 0.032 | 2.11E-275 | 11 |
| MGLL     | 2.03E-276 | 1.182788201 | 0.492 | 0.058 | 4.67E-272 | 11 |
| TACC1.1  | 7.93E-275 | 2.008220855 | 0.831 | 0.209 | 1.82E-270 | 11 |
| ITPRIP   | 8.54E-271 | 1.179823463 | 0.463 | 0.052 | 1.96E-266 | 11 |
| NOTCH1   | 1.03E-270 | 0.930584119 | 0.317 | 0.022 | 2.37E-266 | 11 |
| SYNPO    | 2.47E-269 | 0.848881309 | 0.288 | 0.018 | 5.67E-265 | 11 |
| MGST2.2  | 1.36E-268 | 1.617973082 | 0.725 | 0.147 | 3.12E-264 | 11 |
| MEF2C.2  | 2.06E-265 | 1.613993926 | 0.71  | 0.132 | 4.73E-261 | 11 |
| HEG1     | 2.02E-264 | 1.083213527 | 0.355 | 0.029 | 4.64E-260 | 11 |
| RPGR     | 5.60E-264 | 1.415870679 | 0.455 | 0.052 | 1.29E-259 | 11 |
| RAB13.2  | 1.11E-260 | 1.350172747 | 0.667 | 0.119 | 2.55E-256 | 11 |
| TSPAN12  | 1.16E-260 | 0.865489985 | 0.361 | 0.031 | 2.67E-256 | 11 |

|            |           |             |       |       |           |    |
|------------|-----------|-------------|-------|-------|-----------|----|
| GNAI1      | 2.41E-259 | 0.760909501 | 0.271 | 0.016 | 5.55E-255 | 11 |
| SHROOM4    | 2.31E-253 | 0.636062797 | 0.255 | 0.014 | 5.30E-249 | 11 |
| SERPINI1   | 2.06E-252 | 1.266844208 | 0.328 | 0.026 | 4.74E-248 | 11 |
| FERMT2     | 1.26E-251 | 0.76984903  | 0.328 | 0.026 | 2.90E-247 | 11 |
| PTPRM      | 1.61E-249 | 0.929622078 | 0.366 | 0.034 | 3.70E-245 | 11 |
| PPIC       | 9.97E-249 | 0.7064271   | 0.306 | 0.023 | 2.29E-244 | 11 |
| ITGA5      | 1.10E-248 | 1.151514877 | 0.463 | 0.057 | 2.53E-244 | 11 |
| MLLT4      | 9.10E-248 | 0.88606494  | 0.306 | 0.023 | 2.09E-243 | 11 |
| EPB41L4A   | 3.00E-246 | 0.778054035 | 0.288 | 0.02  | 6.89E-242 | 11 |
| A4GALT     | 5.89E-245 | 0.737688146 | 0.29  | 0.021 | 1.35E-240 | 11 |
| KIAA1147   | 2.89E-244 | 1.026374714 | 0.341 | 0.03  | 6.65E-240 | 11 |
| IFITM3.10  | 1.05E-243 | 2.088020136 | 0.962 | 0.359 | 2.42E-239 | 11 |
| TSPAN15    | 3.46E-243 | 0.70064811  | 0.257 | 0.016 | 7.95E-239 | 11 |
| TTC28      | 1.19E-240 | 0.772506291 | 0.273 | 0.018 | 2.73E-236 | 11 |
| ARHGEF10   | 7.20E-240 | 0.801878201 | 0.271 | 0.018 | 1.66E-235 | 11 |
| FRY        | 6.96E-238 | 0.77556622  | 0.264 | 0.017 | 1.60E-233 | 11 |
| RAPGEF2    | 7.47E-237 | 0.94209255  | 0.328 | 0.029 | 1.72E-232 | 11 |
| SIPA1L2    | 3.97E-236 | 0.875160361 | 0.335 | 0.03  | 9.11E-232 | 11 |
| TGM2       | 1.54E-235 | 1.155228085 | 0.426 | 0.05  | 3.53E-231 | 11 |
| MAP3K6     | 6.80E-234 | 0.816597505 | 0.304 | 0.024 | 1.56E-229 | 11 |
| CYR61      | 7.78E-234 | 1.607588021 | 0.361 | 0.035 | 1.79E-229 | 11 |
| FAM101B    | 1.02E-232 | 0.846716989 | 0.284 | 0.021 | 2.35E-228 | 11 |
| BAIAP2     | 1.76E-232 | 0.72046329  | 0.262 | 0.017 | 4.05E-228 | 11 |
| APLP2.9    | 9.51E-230 | 1.793634911 | 0.831 | 0.236 | 2.19E-225 | 11 |
| CDC42EP1   | 5.48E-228 | 0.67636838  | 0.253 | 0.017 | 1.26E-223 | 11 |
| LIMA1      | 3.51E-226 | 1.219707001 | 0.497 | 0.072 | 8.06E-222 | 11 |
| SNCG       | 3.42E-225 | 0.77292289  | 0.328 | 0.03  | 7.87E-221 | 11 |
| FAM198B    | 3.80E-225 | 0.880874405 | 0.313 | 0.028 | 8.73E-221 | 11 |
| PTP4A3     | 3.26E-223 | 0.723501818 | 0.29  | 0.023 | 7.50E-219 | 11 |
| CD9.4      | 5.98E-223 | 1.748194756 | 0.8   | 0.204 | 1.37E-218 | 11 |
| ITGB1.6    | 1.38E-221 | 1.964882992 | 0.96  | 0.448 | 3.18E-217 | 11 |
| ARHGEF12   | 2.81E-221 | 1.173981071 | 0.466 | 0.065 | 6.47E-217 | 11 |
| PON2       | 2.81E-220 | 1.266161318 | 0.517 | 0.082 | 6.46E-216 | 11 |
| NGFRAP1    | 4.61E-219 | 1.111722762 | 0.572 | 0.097 | 1.06E-214 | 11 |
| TIMP2.2    | 1.15E-214 | 1.159469576 | 0.461 | 0.068 | 2.63E-210 | 11 |
| SEPW1.10   | 1.59E-214 | 1.924784773 | 0.898 | 0.341 | 3.65E-210 | 11 |
| SCARB1     | 7.88E-214 | 1.00403136  | 0.335 | 0.034 | 1.81E-209 | 11 |
| RDX.1      | 8.75E-214 | 1.387254532 | 0.683 | 0.155 | 2.01E-209 | 11 |
| OAZ2.1     | 4.88E-213 | 1.57584576  | 0.698 | 0.166 | 1.12E-208 | 11 |
| TGFBR2.1   | 2.93E-211 | 1.73505919  | 0.725 | 0.184 | 6.74E-207 | 11 |
| IL4R       | 5.67E-211 | 1.141735506 | 0.486 | 0.074 | 1.30E-206 | 11 |
| THBS1      | 1.55E-210 | 0.918979915 | 0.426 | 0.054 | 3.56E-206 | 11 |
| LMO2       | 5.08E-208 | 0.945994236 | 0.317 | 0.031 | 1.17E-203 | 11 |
| YES1       | 1.45E-207 | 0.834270074 | 0.35  | 0.037 | 3.33E-203 | 11 |
| IVNS1ABP.2 | 4.72E-206 | 1.829176537 | 0.723 | 0.187 | 1.09E-201 | 11 |
| CSGALNACT1 | 2.63E-205 | 0.99121255  | 0.368 | 0.043 | 6.05E-201 | 11 |
| ACACB      | 2.30E-203 | 0.732752461 | 0.257 | 0.02  | 5.28E-199 | 11 |
| TMCC3.1    | 4.74E-203 | 1.071154881 | 0.368 | 0.045 | 1.09E-198 | 11 |
| TNFAIP8L1  | 7.54E-203 | 0.936687999 | 0.381 | 0.046 | 1.73E-198 | 11 |
| PKIG       | 4.12E-201 | 0.802641679 | 0.404 | 0.052 | 9.46E-197 | 11 |
| NETO2      | 8.37E-199 | 0.737125484 | 0.282 | 0.025 | 1.92E-194 | 11 |
| YWHAH.9    | 4.29E-198 | 1.641057741 | 0.838 | 0.265 | 9.87E-194 | 11 |
| F2R.1      | 7.22E-198 | 1.203539574 | 0.603 | 0.114 | 1.66E-193 | 11 |
| FNDC3B     | 5.93E-197 | 1.201306597 | 0.506 | 0.088 | 1.36E-192 | 11 |
| LMCD1      | 6.40E-197 | 0.877813295 | 0.317 | 0.032 | 1.47E-192 | 11 |
| REEP3      | 1.13E-195 | 1.10015999  | 0.483 | 0.079 | 2.59E-191 | 11 |
| DGKH.1     | 1.07E-194 | 1.09991528  | 0.47  | 0.072 | 2.47E-190 | 11 |
| RBMS2      | 4.92E-194 | 0.794019194 | 0.297 | 0.029 | 1.13E-189 | 11 |

|           |           |              |       |       |           |    |
|-----------|-----------|--------------|-------|-------|-----------|----|
| STOM      | 8.31E-194 | 1.55210625   | 0.705 | 0.185 | 1.91E-189 | 11 |
| ARHGEF7   | 1.01E-193 | 1.020466287  | 0.419 | 0.059 | 2.32E-189 | 11 |
| GFOD2     | 1.48E-192 | 0.685561351  | 0.295 | 0.028 | 3.41E-188 | 11 |
| CTGF      | 1.95E-192 | 1.331885928  | 0.337 | 0.037 | 4.48E-188 | 11 |
| PROS1     | 1.42E-191 | 0.872219672  | 0.348 | 0.041 | 3.26E-187 | 11 |
| FSCN1     | 1.60E-191 | 0.689021897  | 0.264 | 0.023 | 3.67E-187 | 11 |
| ICAM2     | 1.71E-191 | 1.162964402  | 0.525 | 0.094 | 3.92E-187 | 11 |
| PDLIM1    | 5.36E-191 | 1.02187122   | 0.57  | 0.105 | 1.23E-186 | 11 |
| CTTN      | 7.00E-191 | 0.682687674  | 0.308 | 0.031 | 1.61E-186 | 11 |
| ADIPOR2   | 1.73E-189 | 1.003423786  | 0.412 | 0.059 | 3.98E-185 | 11 |
| RGCC.10   | 5.44E-189 | 2.117798481  | 0.843 | 0.289 | 1.25E-184 | 11 |
| RASAL2.1  | 1.09E-188 | 0.952999676  | 0.37  | 0.048 | 2.51E-184 | 11 |
| VAMP5.5   | 2.36E-188 | 1.597364206  | 0.834 | 0.29  | 5.42E-184 | 11 |
| NFIA      | 5.44E-188 | 1.028049433  | 0.452 | 0.072 | 1.25E-183 | 11 |
| CDC42BPB  | 8.96E-188 | 0.625585544  | 0.264 | 0.023 | 2.06E-183 | 11 |
| CDC42EP3  | 7.58E-187 | 1.214732868  | 0.57  | 0.113 | 1.74E-182 | 11 |
| MLEC      | 4.32E-186 | 1.451237651  | 0.634 | 0.152 | 9.92E-182 | 11 |
| TNFAIP1   | 9.02E-186 | 0.641906246  | 0.293 | 0.029 | 2.07E-181 | 11 |
| BCAP29    | 4.94E-185 | 1.257052523  | 0.563 | 0.115 | 1.14E-180 | 11 |
| RPL41.8   | 3.41E-183 | -1.403663626 | 0.987 | 0.976 | 7.84E-179 | 11 |
| MYO1C     | 3.48E-183 | 0.839054513  | 0.368 | 0.048 | 8.01E-179 | 11 |
| S100A13.1 | 4.70E-183 | 1.029042465  | 0.588 | 0.118 | 1.08E-178 | 11 |
| SERPINB6  | 9.73E-183 | 1.259128968  | 0.65  | 0.159 | 2.24E-178 | 11 |
| CLIC4     | 6.92E-182 | 1.002462781  | 0.47  | 0.08  | 1.59E-177 | 11 |
| TINAGL1   | 5.73E-181 | 0.890273045  | 0.357 | 0.044 | 1.32E-176 | 11 |
| TJP2      | 7.00E-181 | 0.686458276  | 0.255 | 0.022 | 1.61E-176 | 11 |
| DEPTOR    | 9.77E-181 | 0.849790463  | 0.322 | 0.037 | 2.25E-176 | 11 |
| TP53I11   | 4.62E-177 | 0.792443191  | 0.251 | 0.022 | 1.06E-172 | 11 |
| KIAA0355  | 8.75E-177 | 1.096400133  | 0.472 | 0.083 | 2.01E-172 | 11 |
| RPS27.7   | 6.80E-176 | -1.56614623  | 0.982 | 0.975 | 1.56E-171 | 11 |
| ID1       | 7.73E-175 | 1.295746619  | 0.404 | 0.059 | 1.78E-170 | 11 |
| HDAC7     | 1.26E-174 | 0.962641068  | 0.439 | 0.07  | 2.90E-170 | 11 |
| WBP5      | 1.95E-173 | 0.856053695  | 0.446 | 0.073 | 4.49E-169 | 11 |
| SWAP70.2  | 5.49E-173 | 1.126726207  | 0.492 | 0.094 | 1.26E-168 | 11 |
| ZEB1      | 1.98E-172 | 0.973377685  | 0.461 | 0.077 | 4.54E-168 | 11 |
| MARCKSL1  | 5.09E-172 | 1.070456907  | 0.45  | 0.075 | 1.17E-167 | 11 |
| GOLIM4.1  | 2.77E-171 | 1.116513213  | 0.47  | 0.086 | 6.36E-167 | 11 |
| PGM2L1    | 1.05E-170 | 1.038351224  | 0.361 | 0.049 | 2.41E-166 | 11 |
| LHFP      | 5.27E-170 | 0.613292733  | 0.337 | 0.041 | 1.21E-165 | 11 |
| CYB5R3.2  | 8.40E-170 | 1.147086168  | 0.665 | 0.171 | 1.93E-165 | 11 |
| SERPINH1  | 1.67E-167 | 0.901094217  | 0.424 | 0.069 | 3.83E-163 | 11 |
| TMEM184B  | 1.71E-166 | 0.654851164  | 0.282 | 0.03  | 3.92E-162 | 11 |
| SH2D3C    | 6.62E-166 | 0.688806862  | 0.299 | 0.034 | 1.52E-161 | 11 |
| SEC62.9   | 1.17E-164 | 1.475003483  | 0.905 | 0.409 | 2.69E-160 | 11 |
| KLHL5.1   | 1.75E-164 | 1.034698881  | 0.437 | 0.078 | 4.02E-160 | 11 |
| LXN       | 4.90E-164 | 0.778216029  | 0.299 | 0.035 | 1.13E-159 | 11 |
| ELK3      | 7.61E-164 | 1.013432324  | 0.466 | 0.085 | 1.75E-159 | 11 |
| LEPROT.1  | 2.57E-163 | 1.316041026  | 0.656 | 0.182 | 5.91E-159 | 11 |
| EPHX1     | 1.40E-160 | 0.742324581  | 0.29  | 0.034 | 3.21E-156 | 11 |
| PRKCDBP   | 7.08E-160 | 0.869533529  | 0.43  | 0.072 | 1.63E-155 | 11 |
| PHACTR2   | 2.23E-159 | 0.989484561  | 0.494 | 0.096 | 5.13E-155 | 11 |
| RPS2.6    | 3.17E-159 | -1.488364941 | 0.927 | 0.945 | 7.29E-155 | 11 |
| SH3D19    | 7.57E-159 | 0.666579719  | 0.268 | 0.028 | 1.74E-154 | 11 |
| RPL10.7   | 8.51E-159 | -1.268600019 | 0.978 | 0.975 | 1.96E-154 | 11 |
| FAM213A   | 9.34E-158 | 1.036843176  | 0.499 | 0.1   | 2.15E-153 | 11 |
| HEBP1     | 1.01E-157 | 0.958673619  | 0.463 | 0.09  | 2.32E-153 | 11 |
| IL6ST.1   | 5.06E-157 | 1.375697327  | 0.63  | 0.164 | 1.16E-152 | 11 |
| AKT3      | 2.13E-156 | 0.832770666  | 0.357 | 0.052 | 4.89E-152 | 11 |

|             |           |              |       |       |           |    |
|-------------|-----------|--------------|-------|-------|-----------|----|
| NEAT1.7     | 3.91E-156 | 1.608411357  | 0.967 | 0.746 | 8.98E-152 | 11 |
| SH3BP5      | 4.66E-156 | 1.215368502  | 0.541 | 0.123 | 1.07E-151 | 11 |
| BMPR2       | 1.00E-155 | 1.052064525  | 0.39  | 0.064 | 2.30E-151 | 11 |
| RPL13.6     | 2.53E-153 | -1.269292769 | 0.969 | 0.965 | 5.83E-149 | 11 |
| GIMAP8      | 1.57E-152 | 0.711934213  | 0.304 | 0.039 | 3.61E-148 | 11 |
| SLC44A2     | 6.01E-152 | 1.039976197  | 0.446 | 0.082 | 1.38E-147 | 11 |
| PTK2        | 8.20E-152 | 0.626453581  | 0.288 | 0.035 | 1.88E-147 | 11 |
| CALU        | 1.70E-151 | 0.933041022  | 0.463 | 0.091 | 3.91E-147 | 11 |
| ADD1        | 6.48E-151 | 1.287567624  | 0.55  | 0.131 | 1.49E-146 | 11 |
| RPS29.8     | 5.61E-150 | -1.714513416 | 0.938 | 0.921 | 1.29E-145 | 11 |
| RPL13A.8    | 1.41E-149 | -1.188974256 | 0.984 | 0.962 | 3.24E-145 | 11 |
| RPL28.7     | 1.47E-149 | -1.394128779 | 0.938 | 0.932 | 3.38E-145 | 11 |
| RPS15A.6    | 4.37E-149 | -1.3547066   | 0.945 | 0.933 | 1.00E-144 | 11 |
| ABLIM1      | 5.35E-149 | 0.990392457  | 0.379 | 0.06  | 1.23E-144 | 11 |
| PTTG1IP.1   | 6.21E-149 | 1.114222879  | 0.614 | 0.162 | 1.43E-144 | 11 |
| CD81.2      | 7.19E-148 | 1.212622298  | 0.576 | 0.148 | 1.65E-143 | 11 |
| THEM6       | 3.11E-146 | 0.651353797  | 0.264 | 0.03  | 7.14E-142 | 11 |
| RPL23A.8    | 1.87E-144 | -1.372827784 | 0.942 | 0.93  | 4.29E-140 | 11 |
| CCPG1       | 2.60E-144 | 1.168399997  | 0.583 | 0.15  | 5.98E-140 | 11 |
| CPNE2       | 8.41E-144 | 0.635651444  | 0.293 | 0.037 | 1.93E-139 | 11 |
| CDA         | 1.16E-143 | 0.707048765  | 0.259 | 0.03  | 2.67E-139 | 11 |
| NCOA7       | 1.39E-143 | 1.105566106  | 0.528 | 0.12  | 3.19E-139 | 11 |
| MED13L      | 3.38E-143 | 1.009628623  | 0.448 | 0.09  | 7.77E-139 | 11 |
| DHRS3       | 3.63E-143 | 1.096426924  | 0.483 | 0.104 | 8.35E-139 | 11 |
| FKBP1A.7    | 7.44E-142 | 1.424956358  | 0.847 | 0.398 | 1.71E-137 | 11 |
| CCDC85B.4   | 4.64E-141 | 1.386129166  | 0.705 | 0.238 | 1.07E-136 | 11 |
| B3GNT5      | 3.38E-139 | 0.694061596  | 0.271 | 0.034 | 7.76E-135 | 11 |
| RPS18.7     | 1.55E-138 | -1.242339235 | 0.965 | 0.959 | 3.57E-134 | 11 |
| TMCO3       | 3.52E-138 | 0.751579879  | 0.339 | 0.053 | 8.09E-134 | 11 |
| HIPK2       | 4.26E-138 | 1.081153242  | 0.475 | 0.104 | 9.78E-134 | 11 |
| KLF9        | 2.87E-137 | 1.207862297  | 0.565 | 0.148 | 6.60E-133 | 11 |
| RFK         | 1.50E-136 | 1.102964155  | 0.368 | 0.064 | 3.46E-132 | 11 |
| CTTNBP2NL.2 | 3.49E-136 | 0.940058025  | 0.419 | 0.084 | 8.02E-132 | 11 |
| RPLP2.6     | 1.12E-135 | -1.186019859 | 0.958 | 0.944 | 2.58E-131 | 11 |
| RPL39.4     | 2.42E-135 | -1.312432956 | 0.936 | 0.945 | 5.55E-131 | 11 |
| XAF1        | 7.83E-135 | 1.071245407  | 0.477 | 0.105 | 1.80E-130 | 11 |
| CD46        | 3.15E-134 | 1.216477388  | 0.641 | 0.198 | 7.24E-130 | 11 |
| GBP4        | 3.35E-134 | 1.329132144  | 0.532 | 0.133 | 7.70E-130 | 11 |
| FN1.1       | 3.53E-134 | 1.907969395  | 0.49  | 0.112 | 8.12E-130 | 11 |
| DSTN.9      | 5.66E-133 | 1.064177418  | 0.792 | 0.291 | 1.30E-128 | 11 |
| EHD2        | 2.26E-132 | 0.643758429  | 0.295 | 0.041 | 5.20E-128 | 11 |
| RHOB.9      | 2.53E-132 | 1.29398615   | 0.847 | 0.332 | 5.81E-128 | 11 |
| ASAP1       | 2.95E-132 | 0.864126035  | 0.435 | 0.089 | 6.77E-128 | 11 |
| C10orf10.1  | 4.47E-132 | 1.878021133  | 0.466 | 0.104 | 1.03E-127 | 11 |
| RPL21.5     | 7.98E-132 | -1.172314581 | 0.956 | 0.952 | 1.83E-127 | 11 |
| RPS19.6     | 4.36E-131 | -1.247600315 | 0.967 | 0.951 | 1.00E-126 | 11 |
| RPL26.4     | 8.36E-131 | -1.226270109 | 0.949 | 0.935 | 1.92E-126 | 11 |
| PIK3C2A     | 4.35E-130 | 0.922689672  | 0.408 | 0.081 | 9.99E-126 | 11 |
| RPS12.3     | 9.36E-130 | -1.238140129 | 0.953 | 0.938 | 2.15E-125 | 11 |
| RHOC.8      | 1.25E-127 | 1.155127198  | 0.769 | 0.308 | 2.88E-123 | 11 |
| EEF1A1.7    | 8.50E-127 | -1.066586774 | 0.973 | 0.968 | 1.95E-122 | 11 |
| ADM         | 9.75E-127 | 1.303131658  | 0.472 | 0.106 | 2.24E-122 | 11 |
| CTSL.2      | 3.25E-126 | 0.939272795  | 0.552 | 0.145 | 7.47E-122 | 11 |
| RPS3.7      | 3.37E-126 | -1.256091878 | 0.936 | 0.918 | 7.75E-122 | 11 |
| RCN2.1      | 3.99E-126 | 0.940348072  | 0.548 | 0.141 | 9.17E-122 | 11 |
| CAPZA2.6    | 1.65E-125 | 1.144410671  | 0.763 | 0.296 | 3.80E-121 | 11 |
| LUZP1       | 3.67E-125 | 0.949770247  | 0.468 | 0.107 | 8.42E-121 | 11 |
| NEDD9.1     | 3.69E-125 | 1.043128619  | 0.574 | 0.156 | 8.47E-121 | 11 |



|            |           |              |       |       |           |    |
|------------|-----------|--------------|-------|-------|-----------|----|
| MAP4.2     | 5.90E-125 | 1.077695081  | 0.588 | 0.165 | 1.36E-120 | 11 |
| CD151.1    | 1.06E-124 | 0.939733473  | 0.63  | 0.186 | 2.44E-120 | 11 |
| RPL27A.6   | 1.93E-124 | -1.162164268 | 0.942 | 0.93  | 4.43E-120 | 11 |
| EXOC6      | 9.05E-124 | 0.935993827  | 0.344 | 0.06  | 2.08E-119 | 11 |
| YBX3       | 2.43E-123 | 1.028789156  | 0.596 | 0.171 | 5.59E-119 | 11 |
| RPL18A.6   | 4.80E-123 | -1.218953829 | 0.936 | 0.93  | 1.10E-118 | 11 |
| MTRNR2L8.1 | 9.68E-123 | 1.61871325   | 0.641 | 0.211 | 2.22E-118 | 11 |
| RPS27A.7   | 2.17E-122 | -1.08815293  | 0.953 | 0.939 | 4.99E-118 | 11 |
| TSPAN4     | 3.90E-122 | 0.856690613  | 0.421 | 0.091 | 8.96E-118 | 11 |
| PAM        | 1.87E-121 | 0.764627311  | 0.368 | 0.068 | 4.29E-117 | 11 |
| RPLP1.2    | 1.94E-121 | -1.021331199 | 0.978 | 0.966 | 4.46E-117 | 11 |
| PTPN12     | 6.20E-121 | 0.903407489  | 0.439 | 0.099 | 1.42E-116 | 11 |
| RPL31.8    | 1.67E-120 | -1.349353403 | 0.894 | 0.907 | 3.83E-116 | 11 |
| RABGAP1    | 3.93E-120 | 0.841031287  | 0.335 | 0.058 | 9.03E-116 | 11 |
| GNAS.5     | 1.29E-118 | 1.336135887  | 0.765 | 0.331 | 2.97E-114 | 11 |
| RIN2       | 2.01E-118 | 0.68091187   | 0.266 | 0.038 | 4.62E-114 | 11 |
| SLC27A3    | 1.22E-117 | 0.752364386  | 0.271 | 0.039 | 2.81E-113 | 11 |
| ITM2B.9    | 3.27E-117 | 1.128849082  | 0.991 | 0.772 | 7.51E-113 | 11 |
| HSP90B1.3  | 5.44E-117 | 1.210088961  | 0.838 | 0.392 | 1.25E-112 | 11 |
| HLA-E.9    | 9.44E-117 | 1.015220303  | 0.984 | 0.783 | 2.17E-112 | 11 |
| DUSP6      | 1.58E-116 | 0.89852765   | 0.459 | 0.106 | 3.63E-112 | 11 |
| ARHGAP5    | 1.90E-116 | 0.80672757   | 0.401 | 0.084 | 4.37E-112 | 11 |
| RPS14.7    | 2.10E-116 | -1.064037827 | 0.956 | 0.946 | 4.83E-112 | 11 |
| ATXN3      | 2.36E-116 | 0.904442598  | 0.419 | 0.093 | 5.42E-112 | 11 |
| RPL19.5    | 2.62E-116 | -1.113416599 | 0.933 | 0.924 | 6.01E-112 | 11 |
| RPL37.5    | 2.63E-116 | -1.279608777 | 0.896 | 0.909 | 6.05E-112 | 11 |
| CTNNA1     | 4.50E-116 | 0.860030615  | 0.481 | 0.123 | 1.03E-111 | 11 |
| WARS       | 9.93E-116 | 0.921021391  | 0.386 | 0.08  | 2.28E-111 | 11 |
| RPL30.4    | 1.85E-115 | -1.24167947  | 0.905 | 0.897 | 4.25E-111 | 11 |
| 10-Sep     | 4.88E-115 | 0.59906103   | 0.264 | 0.039 | 1.12E-110 | 11 |
| CALCOCO2   | 2.64E-114 | 1.024795781  | 0.57  | 0.17  | 6.07E-110 | 11 |
| LMNA       | 6.33E-114 | 1.128742967  | 0.57  | 0.162 | 1.46E-109 | 11 |
| AAMDC      | 2.29E-113 | 0.732434089  | 0.388 | 0.081 | 5.27E-109 | 11 |
| GFOD1      | 4.33E-113 | 0.814666203  | 0.386 | 0.077 | 9.95E-109 | 11 |
| PPM1F      | 8.43E-113 | 0.633140217  | 0.251 | 0.035 | 1.94E-108 | 11 |
| SERINC3    | 5.46E-112 | 0.975901737  | 0.574 | 0.173 | 1.26E-107 | 11 |
| CTNND1.1   | 8.89E-111 | 0.859766781  | 0.368 | 0.078 | 2.04E-106 | 11 |
| ROCK2      | 3.97E-110 | 0.705520346  | 0.299 | 0.05  | 9.13E-106 | 11 |
| CTNNB1.1   | 1.01E-108 | 1.165268     | 0.599 | 0.191 | 2.32E-104 | 11 |
| TNS1       | 1.01E-108 | 0.583469899  | 0.268 | 0.041 | 2.33E-104 | 11 |
| PTPRC.10   | 1.82E-107 | -2.677045618 | 0.093 | 0.634 | 4.18E-103 | 11 |
| ARHGAP18.2 | 6.14E-107 | 1.050003192  | 0.588 | 0.185 | 1.41E-102 | 11 |
| PLOD1      | 6.87E-107 | 0.626517968  | 0.268 | 0.043 | 1.58E-102 | 11 |
| FAM43A     | 8.93E-107 | 0.572551811  | 0.257 | 0.038 | 2.05E-102 | 11 |
| NASP       | 5.25E-106 | 1.083848007  | 0.619 | 0.206 | 1.21E-101 | 11 |
| RPL12.5    | 3.27E-104 | -1.17388506  | 0.927 | 0.911 | 7.51E-100 | 11 |
| GINM1      | 9.29E-104 | 0.832073149  | 0.463 | 0.122 | 2.13E-99  | 11 |
| IFITM2.8   | 2.23E-102 | 0.932294359  | 0.863 | 0.463 | 5.13E-98  | 11 |
| SNRK       | 2.29E-102 | 0.870635123  | 0.43  | 0.103 | 5.25E-98  | 11 |
| RPS24.5    | 3.53E-102 | -1.066159981 | 0.947 | 0.912 | 8.11E-98  | 11 |
| MAPK3      | 3.66E-102 | 0.606542142  | 0.286 | 0.05  | 8.41E-98  | 11 |
| RPS3A.3    | 5.36E-102 | -1.038654661 | 0.947 | 0.929 | 1.23E-97  | 11 |
| ARRDC2     | 6.91E-102 | 0.980106056  | 0.377 | 0.086 | 1.59E-97  | 11 |
| TCEAL4.1   | 7.34E-102 | 0.731400929  | 0.512 | 0.147 | 1.69E-97  | 11 |
| RPL10A.7   | 1.21E-101 | -1.359261597 | 0.823 | 0.866 | 2.77E-97  | 11 |
| XIST.7     | 3.77E-101 | 0.999811084  | 0.876 | 0.409 | 8.66E-97  | 11 |
| RPS21.6    | 1.19E-100 | -1.349968086 | 0.836 | 0.863 | 2.73E-96  | 11 |
| RPL11.3    | 2.16E-100 | -0.952101452 | 0.969 | 0.937 | 4.96E-96  | 11 |

|              |           |              |       |       |          |    |
|--------------|-----------|--------------|-------|-------|----------|----|
| RPS25.7      | 3.05E-100 | -1.091769714 | 0.929 | 0.917 | 7.01E-96 | 11 |
| RPS15.7      | 3.15E-100 | -0.970444537 | 0.949 | 0.931 | 7.24E-96 | 11 |
| RPL6.6       | 1.65E-99  | -1.247800938 | 0.858 | 0.883 | 3.78E-95 | 11 |
| RGL2         | 5.62E-99  | 0.591499374  | 0.304 | 0.056 | 1.29E-94 | 11 |
| ADGRG1       | 5.90E-99  | 0.634256792  | 0.368 | 0.077 | 1.36E-94 | 11 |
| VGLL4        | 2.16E-98  | 0.61196797   | 0.339 | 0.069 | 4.96E-94 | 11 |
| PEA15.2      | 2.45E-98  | 0.791028526  | 0.406 | 0.101 | 5.63E-94 | 11 |
| INPP1        | 4.41E-97  | 0.585169621  | 0.286 | 0.051 | 1.01E-92 | 11 |
| ITPRIPL2.1   | 6.33E-97  | 0.652864436  | 0.266 | 0.046 | 1.45E-92 | 11 |
| KTN1.4       | 2.09E-96  | 0.996982293  | 0.787 | 0.369 | 4.80E-92 | 11 |
| FRMD8        | 2.88E-96  | 0.648143164  | 0.295 | 0.054 | 6.61E-92 | 11 |
| RPL34.7      | 3.11E-96  | -0.938598998 | 0.987 | 0.952 | 7.14E-92 | 11 |
| RGS3         | 4.43E-96  | 0.581319805  | 0.253 | 0.04  | 1.02E-91 | 11 |
| WDR60        | 5.52E-96  | 0.754156473  | 0.401 | 0.096 | 1.27E-91 | 11 |
| CYSTM1.1     | 1.78E-95  | 0.681306831  | 0.475 | 0.129 | 4.08E-91 | 11 |
| RPL32.2      | 1.93E-95  | -0.982863851 | 0.942 | 0.926 | 4.44E-91 | 11 |
| SLK          | 2.36E-95  | 0.804634602  | 0.348 | 0.076 | 5.42E-91 | 11 |
| FYN.7        | 3.43E-95  | 1.023693193  | 0.69  | 0.252 | 7.88E-91 | 11 |
| RPS16.5      | 3.85E-95  | -1.11928849  | 0.9   | 0.891 | 8.86E-91 | 11 |
| CCDC50.2     | 1.21E-94  | 0.784753428  | 0.428 | 0.113 | 2.78E-90 | 11 |
| RPS8.6       | 5.99E-94  | -1.135929345 | 0.931 | 0.917 | 1.38E-89 | 11 |
| COPS8        | 1.16E-93  | 0.830162207  | 0.417 | 0.106 | 2.67E-89 | 11 |
| NPTN.1       | 1.69E-93  | 0.78237397   | 0.304 | 0.061 | 3.88E-89 | 11 |
| HMBX1        | 3.26E-92  | 0.842082903  | 0.428 | 0.111 | 7.49E-88 | 11 |
| RPL35A.7     | 4.16E-92  | -1.015331203 | 0.918 | 0.917 | 9.57E-88 | 11 |
| SRP14.3      | 4.62E-92  | 1.042541524  | 0.927 | 0.709 | 1.06E-87 | 11 |
| SLC1A5.1     | 6.09E-92  | 0.846716327  | 0.361 | 0.085 | 1.40E-87 | 11 |
| RPS23.4      | 1.20E-91  | -0.954294685 | 0.945 | 0.918 | 2.75E-87 | 11 |
| CDC37.3      | 1.55E-91  | 0.940010233  | 0.701 | 0.295 | 3.57E-87 | 11 |
| TRIOBP       | 2.08E-91  | 0.584020459  | 0.297 | 0.058 | 4.77E-87 | 11 |
| CD40         | 3.29E-91  | 0.537626962  | 0.295 | 0.058 | 7.55E-87 | 11 |
| CRK          | 3.29E-91  | 0.734219489  | 0.337 | 0.075 | 7.56E-87 | 11 |
| MAP4K4       | 5.18E-91  | 0.753328298  | 0.322 | 0.067 | 1.19E-86 | 11 |
| RPSA.5       | 7.89E-91  | -1.583562241 | 0.698 | 0.807 | 1.81E-86 | 11 |
| ACTN4.1      | 1.43E-90  | 0.909597301  | 0.616 | 0.222 | 3.29E-86 | 11 |
| SYPL1        | 1.55E-90  | 0.83669922   | 0.543 | 0.177 | 3.56E-86 | 11 |
| RPS6.4       | 2.87E-90  | -0.942203262 | 0.967 | 0.942 | 6.59E-86 | 11 |
| GIMAP7.10    | 3.35E-90  | 1.090628383  | 0.687 | 0.271 | 7.69E-86 | 11 |
| RGS1.11      | 9.63E-90  | -3.096171955 | 0.377 | 0.707 | 2.21E-85 | 11 |
| MXD4         | 2.07E-89  | 0.768422859  | 0.419 | 0.109 | 4.76E-85 | 11 |
| MPZL1.1      | 3.39E-89  | 0.633288725  | 0.282 | 0.055 | 7.80E-85 | 11 |
| RP11-553L6.5 | 3.79E-89  | 0.593100817  | 0.259 | 0.046 | 8.70E-85 | 11 |
| CXCR4.8      | 3.67E-88  | -2.38869003  | 0.599 | 0.781 | 8.43E-84 | 11 |
| NAA38.6      | 4.91E-88  | 0.941231503  | 0.659 | 0.274 | 1.13E-83 | 11 |
| NUCB2.1      | 5.86E-88  | 0.692023026  | 0.528 | 0.16  | 1.35E-83 | 11 |
| FAU.3        | 5.87E-88  | -1.01578862  | 0.905 | 0.888 | 1.35E-83 | 11 |
| ABL2.2       | 6.28E-88  | 0.694053776  | 0.306 | 0.064 | 1.44E-83 | 11 |
| GIMAP6       | 8.06E-88  | 0.644147727  | 0.386 | 0.093 | 1.85E-83 | 11 |
| BST2.6       | 9.91E-88  | 1.066485832  | 0.741 | 0.348 | 2.28E-83 | 11 |
| EDEM3        | 1.05E-87  | 0.714018177  | 0.271 | 0.051 | 2.41E-83 | 11 |
| CD63.9       | 1.23E-87  | 0.868997746  | 0.907 | 0.507 | 2.82E-83 | 11 |
| LRCH1        | 1.73E-86  | 0.581973448  | 0.257 | 0.047 | 3.97E-82 | 11 |
| EPS8.1       | 2.43E-86  | 0.730904109  | 0.317 | 0.07  | 5.59E-82 | 11 |
| RPS17.4      | 4.09E-86  | -1.015718902 | 0.914 | 0.897 | 9.40E-82 | 11 |
| RPS20.4      | 1.71E-85  | -1.020448773 | 0.92  | 0.896 | 3.94E-81 | 11 |
| VIM.9        | 1.87E-85  | 0.867155946  | 0.98  | 0.764 | 4.29E-81 | 11 |
| RPL35.5      | 2.48E-85  | -1.044338768 | 0.914 | 0.897 | 5.71E-81 | 11 |
| RCN1         | 2.93E-85  | 0.698859037  | 0.35  | 0.084 | 6.73E-81 | 11 |

|            |          |              |       |       |          |    |
|------------|----------|--------------|-------|-------|----------|----|
| TBC1D15    | 7.90E-85 | 0.785966492  | 0.39  | 0.102 | 1.82E-80 | 11 |
| PDLIM5     | 1.19E-84 | 0.658396343  | 0.33  | 0.075 | 2.74E-80 | 11 |
| RPS4X.7    | 2.90E-84 | -0.966808837 | 0.933 | 0.938 | 6.66E-80 | 11 |
| FEZ2.1     | 9.35E-84 | 0.756762704  | 0.441 | 0.13  | 2.15E-79 | 11 |
| RAC1.7     | 9.52E-84 | 0.818403163  | 0.843 | 0.435 | 2.19E-79 | 11 |
| TRIM56.2   | 2.86E-83 | 0.848089327  | 0.534 | 0.179 | 6.58E-79 | 11 |
| RRBP1.1    | 2.91E-83 | 0.937626507  | 0.459 | 0.145 | 6.68E-79 | 11 |
| POMP.6     | 2.05E-82 | 0.935017076  | 0.812 | 0.436 | 4.70E-78 | 11 |
| RPL14.5    | 2.94E-82 | -1.129692053 | 0.878 | 0.868 | 6.76E-78 | 11 |
| NDRG2.1    | 3.19E-82 | 0.684896507  | 0.308 | 0.069 | 7.33E-78 | 11 |
| DYNC1LI2   | 3.74E-82 | 0.703895588  | 0.406 | 0.11  | 8.59E-78 | 11 |
| CORO1A.8   | 3.77E-82 | -2.205015891 | 0.126 | 0.579 | 8.66E-78 | 11 |
| FAM214A    | 5.02E-82 | 0.75361758   | 0.339 | 0.079 | 1.15E-77 | 11 |
| RPS7.7     | 5.38E-82 | -1.029900652 | 0.898 | 0.884 | 1.24E-77 | 11 |
| ICA1       | 1.60E-81 | 0.536523591  | 0.255 | 0.047 | 3.67E-77 | 11 |
| RPL3.6     | 3.41E-80 | -0.906428482 | 0.962 | 0.931 | 7.83E-76 | 11 |
| TAX1BP3.1  | 7.95E-80 | 0.680105111  | 0.441 | 0.133 | 1.83E-75 | 11 |
| DHRS7B     | 1.06E-79 | 0.594732352  | 0.262 | 0.052 | 2.43E-75 | 11 |
| SLC44A1    | 3.86E-79 | 0.644104255  | 0.308 | 0.071 | 8.87E-75 | 11 |
| RSU1       | 4.52E-79 | 0.745877882  | 0.441 | 0.133 | 1.04E-74 | 11 |
| GRN.10     | 4.67E-79 | 0.604668314  | 0.667 | 0.24  | 1.07E-74 | 11 |
| IFI6       | 5.42E-79 | 0.788425766  | 0.55  | 0.195 | 1.25E-74 | 11 |
| ZBTB16.1   | 5.72E-78 | 0.911223305  | 0.563 | 0.209 | 1.31E-73 | 11 |
| RPL38.5    | 9.04E-78 | -1.112783155 | 0.865 | 0.868 | 2.08E-73 | 11 |
| PRDX1.6    | 1.15E-77 | 0.67870043   | 0.798 | 0.39  | 2.64E-73 | 11 |
| LAMP1.3    | 1.25E-77 | 0.844834722  | 0.681 | 0.292 | 2.87E-73 | 11 |
| FNIP2.1    | 1.30E-77 | 0.696312636  | 0.302 | 0.069 | 3.00E-73 | 11 |
| RPS28.6    | 1.73E-77 | -0.763128674 | 0.991 | 0.946 | 3.97E-73 | 11 |
| LAPTM4A.8  | 3.04E-77 | 0.657143294  | 0.758 | 0.338 | 6.99E-73 | 11 |
| QKI.2      | 1.10E-76 | 0.798287632  | 0.381 | 0.108 | 2.52E-72 | 11 |
| ZFP36L2.10 | 2.70E-76 | -2.492592429 | 0.448 | 0.707 | 6.20E-72 | 11 |
| TMEM245    | 3.67E-76 | 0.606836687  | 0.302 | 0.068 | 8.44E-72 | 11 |
| RPL15.1    | 2.02E-75 | -0.843789144 | 0.94  | 0.906 | 4.65E-71 | 11 |
| ZFYVE21    | 5.79E-75 | 0.568942789  | 0.299 | 0.069 | 1.33E-70 | 11 |
| RPS26.7    | 7.05E-75 | -1.073575066 | 0.887 | 0.87  | 1.62E-70 | 11 |
| RBMS1.2    | 9.39E-75 | 0.843183993  | 0.543 | 0.194 | 2.16E-70 | 11 |
| BTG1.10    | 2.09E-74 | -1.734141029 | 0.891 | 0.841 | 4.81E-70 | 11 |
| MTRNR2L12  | 3.40E-74 | 0.961046092  | 0.499 | 0.17  | 7.80E-70 | 11 |
| GNAI2.7    | 1.48E-73 | 0.955442893  | 0.594 | 0.249 | 3.40E-69 | 11 |
| ASPH.1     | 2.18E-73 | 0.65455937   | 0.35  | 0.094 | 5.01E-69 | 11 |
| MYL12B.2   | 2.43E-73 | 0.855440256  | 0.9   | 0.626 | 5.58E-69 | 11 |
| HCST.9     | 4.08E-73 | -2.108306915 | 0.133 | 0.558 | 9.37E-69 | 11 |
| RPS13.4    | 1.22E-72 | -0.985335975 | 0.905 | 0.877 | 2.79E-68 | 11 |
| ABCG1.1    | 2.29E-72 | 0.690460316  | 0.379 | 0.107 | 5.27E-68 | 11 |
| TNFSF10.1  | 2.30E-72 | 0.958094695  | 0.463 | 0.157 | 5.29E-68 | 11 |
| RPL7.6     | 2.97E-72 | -0.928150648 | 0.945 | 0.919 | 6.83E-68 | 11 |
| RNF115.3   | 5.27E-72 | 0.837740515  | 0.554 | 0.209 | 1.21E-67 | 11 |
| GPX3.2     | 1.21E-71 | 0.945962849  | 0.466 | 0.155 | 2.79E-67 | 11 |
| PXN        | 1.92E-71 | 0.568686589  | 0.302 | 0.071 | 4.40E-67 | 11 |
| LRMP       | 7.99E-71 | 0.721788477  | 0.353 | 0.095 | 1.84E-66 | 11 |
| RPL36.9    | 1.07E-70 | -0.984640735 | 0.931 | 0.912 | 2.46E-66 | 11 |
| MALAT1.10  | 2.11E-70 | 0.738963     | 0.998 | 0.982 | 4.85E-66 | 11 |
| BCAP31.3   | 4.45E-70 | 0.758902155  | 0.623 | 0.268 | 1.02E-65 | 11 |
| PLEKHA1    | 4.54E-70 | 0.522606835  | 0.395 | 0.112 | 1.04E-65 | 11 |
| HSPB1.9    | 5.35E-70 | 0.615425637  | 0.829 | 0.421 | 1.23E-65 | 11 |
| JMJD1C.4   | 2.50E-69 | 0.949477439  | 0.588 | 0.247 | 5.74E-65 | 11 |
| RALB       | 2.99E-69 | 0.585479569  | 0.341 | 0.092 | 6.87E-65 | 11 |
| CD44.7     | 3.75E-69 | -1.934956634 | 0.073 | 0.505 | 8.61E-65 | 11 |

|             |          |              |       |       |          |    |
|-------------|----------|--------------|-------|-------|----------|----|
| RPL9.4      | 4.32E-69 | -0.853813845 | 0.942 | 0.9   | 9.92E-65 | 11 |
| SH3GLB1.3   | 1.01E-68 | 0.772939394  | 0.603 | 0.257 | 2.32E-64 | 11 |
| DPYSL2.2    | 4.32E-68 | 0.769362908  | 0.41  | 0.131 | 9.92E-64 | 11 |
| S100A4.9    | 4.56E-68 | -2.169469805 | 0.479 | 0.707 | 1.05E-63 | 11 |
| RPLP0.7     | 4.66E-68 | -1.335917736 | 0.825 | 0.843 | 1.07E-63 | 11 |
| TMOD3       | 4.72E-68 | 0.705887824  | 0.468 | 0.161 | 1.09E-63 | 11 |
| ARL2        | 4.98E-68 | 0.641334791  | 0.43  | 0.14  | 1.14E-63 | 11 |
| TMSB4X.5    | 6.21E-68 | -0.789661562 | 1     | 0.976 | 1.43E-63 | 11 |
| CLCN3       | 7.18E-68 | 0.6007284    | 0.251 | 0.054 | 1.65E-63 | 11 |
| PARP14.2    | 7.56E-68 | 0.903611837  | 0.517 | 0.194 | 1.74E-63 | 11 |
| RPS10.5     | 1.12E-67 | -1.249051354 | 0.727 | 0.788 | 2.57E-63 | 11 |
| CLSTN1      | 1.23E-67 | 0.616329375  | 0.335 | 0.09  | 2.82E-63 | 11 |
| CEP68       | 1.93E-67 | 0.516149922  | 0.255 | 0.056 | 4.43E-63 | 11 |
| SECISBP2L   | 3.28E-67 | 0.66455374   | 0.306 | 0.078 | 7.54E-63 | 11 |
| PARVB       | 3.99E-67 | 0.616645148  | 0.29  | 0.072 | 9.16E-63 | 11 |
| TUG1        | 9.93E-67 | 0.628925132  | 0.308 | 0.078 | 2.28E-62 | 11 |
| RPL18.5     | 4.76E-66 | -0.953118494 | 0.885 | 0.87  | 1.09E-61 | 11 |
| PSMB5       | 1.34E-65 | 0.536303427  | 0.435 | 0.144 | 3.08E-61 | 11 |
| UBE2J1      | 1.56E-65 | 0.67307979   | 0.377 | 0.112 | 3.58E-61 | 11 |
| VIMP.1      | 3.15E-65 | 0.683557361  | 0.55  | 0.218 | 7.23E-61 | 11 |
| RTN4.8      | 4.25E-65 | 0.748518054  | 0.703 | 0.338 | 9.77E-61 | 11 |
| FCGRT.5     | 6.12E-65 | 0.555471806  | 0.605 | 0.229 | 1.41E-60 | 11 |
| USP34.2     | 6.96E-65 | 0.794649958  | 0.47  | 0.167 | 1.60E-60 | 11 |
| LPP         | 1.51E-64 | 0.718616514  | 0.457 | 0.156 | 3.48E-60 | 11 |
| ZFYVE16     | 2.64E-64 | 0.562454776  | 0.279 | 0.068 | 6.08E-60 | 11 |
| FYB.9       | 2.90E-64 | -1.918946159 | 0.069 | 0.473 | 6.66E-60 | 11 |
| SDF4        | 6.08E-64 | 0.717432654  | 0.497 | 0.186 | 1.40E-59 | 11 |
| RPL36A.6    | 2.31E-63 | -1.309232387 | 0.725 | 0.804 | 5.31E-59 | 11 |
| MIR4435-2HG | 2.38E-63 | 0.761019283  | 0.43  | 0.142 | 5.46E-59 | 11 |
| CAMTA1      | 2.38E-63 | 0.576103341  | 0.497 | 0.185 | 5.46E-59 | 11 |
| DNAJC3      | 4.32E-63 | 0.664689995  | 0.439 | 0.152 | 9.94E-59 | 11 |
| RAB11A.3    | 1.85E-62 | 0.611206213  | 0.545 | 0.218 | 4.25E-58 | 11 |
| RPS9.4      | 3.26E-62 | -0.88468122  | 0.891 | 0.878 | 7.49E-58 | 11 |
| ZBTB20.1    | 3.93E-62 | 0.663919386  | 0.437 | 0.144 | 9.04E-58 | 11 |
| ERLEC1      | 4.42E-62 | 0.683833287  | 0.448 | 0.158 | 1.02E-57 | 11 |
| TMEM30A     | 1.63E-61 | 0.749646498  | 0.406 | 0.136 | 3.75E-57 | 11 |
| AP1S2.3     | 3.40E-61 | 0.565530178  | 0.557 | 0.214 | 7.82E-57 | 11 |
| DOCK4.1     | 3.75E-61 | 0.615285151  | 0.266 | 0.066 | 8.61E-57 | 11 |
| CD2.10      | 3.78E-61 | -2.391332575 | 0.082 | 0.469 | 8.69E-57 | 11 |
| CYTIP.9     | 3.90E-61 | -1.889018708 | 0.095 | 0.488 | 8.97E-57 | 11 |
| QSOX1       | 7.30E-61 | 0.638791284  | 0.299 | 0.081 | 1.68E-56 | 11 |
| IFNGR1.8    | 7.54E-61 | 0.68990598   | 0.603 | 0.248 | 1.73E-56 | 11 |
| ELMO1.1     | 1.28E-60 | 0.73040457   | 0.417 | 0.142 | 2.95E-56 | 11 |
| ATOX1.3     | 2.49E-60 | 0.539446596  | 0.532 | 0.214 | 5.73E-56 | 11 |
| GABARAPL2.3 | 2.95E-60 | 0.719568581  | 0.676 | 0.337 | 6.77E-56 | 11 |
| NFIC        | 3.62E-60 | 0.621073475  | 0.359 | 0.112 | 8.32E-56 | 11 |
| NDUFA12.5   | 4.17E-60 | 0.689727559  | 0.594 | 0.263 | 9.57E-56 | 11 |
| RPL27.2     | 6.73E-60 | -0.920563314 | 0.856 | 0.852 | 1.55E-55 | 11 |
| CD69.11     | 6.86E-60 | -2.774090533 | 0.186 | 0.54  | 1.58E-55 | 11 |
| RAB6A       | 1.22E-59 | 0.619126424  | 0.435 | 0.151 | 2.80E-55 | 11 |
| CD37.7      | 1.62E-59 | -1.659992047 | 0.086 | 0.476 | 3.72E-55 | 11 |
| EID1.4      | 1.90E-59 | 0.753009076  | 0.732 | 0.418 | 4.38E-55 | 11 |
| EIF4G3      | 2.48E-59 | 0.562160214  | 0.262 | 0.064 | 5.70E-55 | 11 |
| C12orf57.6  | 2.85E-59 | 0.760129805  | 0.71  | 0.361 | 6.54E-55 | 11 |
| UBA52.2     | 2.91E-59 | -0.846773876 | 0.878 | 0.866 | 6.68E-55 | 11 |
| CELF2.8     | 3.54E-59 | -1.705808837 | 0.051 | 0.438 | 8.14E-55 | 11 |
| PTMS.3      | 5.75E-59 | 0.572387349  | 0.563 | 0.231 | 1.32E-54 | 11 |
| PML         | 1.49E-58 | 0.508549995  | 0.262 | 0.065 | 3.42E-54 | 11 |

|           |          |              |       |       |          |    |
|-----------|----------|--------------|-------|-------|----------|----|
| PICALM.2  | 2.70E-58 | 0.740077982  | 0.472 | 0.18  | 6.20E-54 | 11 |
| RPS5.5    | 3.88E-58 | -1.081536545 | 0.86  | 0.841 | 8.92E-54 | 11 |
| TMEM50B   | 1.32E-57 | 0.538063629  | 0.384 | 0.122 | 3.04E-53 | 11 |
| APOL3     | 1.43E-57 | 0.592064519  | 0.335 | 0.099 | 3.28E-53 | 11 |
| ADAM9.1   | 2.65E-57 | 0.543315462  | 0.257 | 0.066 | 6.10E-53 | 11 |
| LINC00657 | 4.07E-57 | 0.585995876  | 0.43  | 0.152 | 9.36E-53 | 11 |
| ARGLU1.7  | 4.70E-57 | 0.83674393   | 0.765 | 0.422 | 1.08E-52 | 11 |
| SCARB2.2  | 7.09E-57 | 0.572223238  | 0.319 | 0.096 | 1.63E-52 | 11 |
| ABI2      | 7.93E-57 | 0.54119286   | 0.304 | 0.085 | 1.82E-52 | 11 |
| RPL37A.2  | 8.90E-57 | -0.723889146 | 0.936 | 0.905 | 2.04E-52 | 11 |
| CLTC.1    | 1.09E-56 | 0.560892649  | 0.357 | 0.113 | 2.50E-52 | 11 |
| CD52.8    | 3.72E-56 | -2.352724258 | 0.246 | 0.559 | 8.55E-52 | 11 |
| RPL7A.4   | 4.32E-56 | -0.885306265 | 0.874 | 0.847 | 9.94E-52 | 11 |
| TSPAN14   | 4.71E-56 | 0.650669116  | 0.492 | 0.193 | 1.08E-51 | 11 |
| ADAM10    | 4.86E-56 | 0.712336136  | 0.406 | 0.141 | 1.12E-51 | 11 |
| RPL29.1   | 4.90E-56 | -0.879517055 | 0.891 | 0.854 | 1.13E-51 | 11 |
| RABAC1.5  | 5.51E-56 | 0.690347106  | 0.683 | 0.346 | 1.27E-51 | 11 |
| C5orf24   | 7.42E-56 | 0.611106602  | 0.348 | 0.11  | 1.70E-51 | 11 |
| FDPS.1    | 1.36E-55 | 0.646621005  | 0.472 | 0.183 | 3.13E-51 | 11 |
| LSP1.10   | 1.42E-55 | -1.69814857  | 0.08  | 0.446 | 3.26E-51 | 11 |
| RPL5.4    | 1.46E-55 | -0.956372963 | 0.867 | 0.852 | 3.37E-51 | 11 |
| AHNAK.4   | 1.55E-55 | 0.743821787  | 0.605 | 0.284 | 3.56E-51 | 11 |
| SEPT2.4   | 1.79E-55 | 0.688238538  | 0.572 | 0.251 | 4.11E-51 | 11 |
| MAGED2    | 2.35E-55 | 0.592110289  | 0.41  | 0.143 | 5.41E-51 | 11 |
| GIMAP4.7  | 2.83E-55 | 0.733772859  | 0.674 | 0.327 | 6.50E-51 | 11 |
| RPL8.3    | 4.40E-55 | -0.821284646 | 0.911 | 0.881 | 1.01E-50 | 11 |
| MAGT1     | 5.33E-55 | 0.621414964  | 0.317 | 0.095 | 1.22E-50 | 11 |
| UXS1      | 7.03E-55 | 0.523974153  | 0.302 | 0.085 | 1.62E-50 | 11 |
| TRAC.11   | 1.87E-54 | -2.331158736 | 0.082 | 0.444 | 4.29E-50 | 11 |
| ZFH3.2    | 2.62E-54 | 0.613565898  | 0.284 | 0.081 | 6.02E-50 | 11 |
| CALR.3    | 3.28E-54 | 0.621627854  | 0.778 | 0.432 | 7.54E-50 | 11 |
| UTRN.2    | 3.79E-54 | 0.832713323  | 0.514 | 0.221 | 8.71E-50 | 11 |
| AES.5     | 4.25E-54 | 0.727668662  | 0.557 | 0.241 | 9.76E-50 | 11 |
| MACF1.7   | 5.22E-54 | 0.768230048  | 0.563 | 0.247 | 1.20E-49 | 11 |
| NCOA3     | 6.42E-54 | 0.647771539  | 0.344 | 0.11  | 1.48E-49 | 11 |
| SLC2A3.6  | 1.17E-53 | 0.96032486   | 0.565 | 0.254 | 2.68E-49 | 11 |
| LAPTM5.9  | 1.27E-53 | -1.719955621 | 0.295 | 0.576 | 2.91E-49 | 11 |
| CCL5.10   | 1.40E-53 | -3.131235179 | 0.284 | 0.571 | 3.21E-49 | 11 |
| TM9SF2.1  | 1.55E-53 | 0.624681739  | 0.401 | 0.144 | 3.56E-49 | 11 |
| KLF3.1    | 2.37E-53 | 0.566143241  | 0.404 | 0.141 | 5.45E-49 | 11 |
| CHMP3     | 2.66E-53 | 0.556200826  | 0.446 | 0.171 | 6.10E-49 | 11 |
| GALNT1    | 2.88E-53 | 0.659511142  | 0.286 | 0.082 | 6.63E-49 | 11 |
| RPL4.3    | 6.16E-53 | -1.143780889 | 0.736 | 0.77  | 1.42E-48 | 11 |
| HNRNPA1.3 | 9.61E-53 | -1.128750603 | 0.743 | 0.779 | 2.21E-48 | 11 |
| MIDN      | 1.13E-52 | 0.514932716  | 0.368 | 0.12  | 2.59E-48 | 11 |
| MBNL2     | 4.50E-52 | 0.558325136  | 0.293 | 0.086 | 1.03E-47 | 11 |
| IFNAR1.1  | 4.78E-52 | 0.568839626  | 0.397 | 0.143 | 1.10E-47 | 11 |
| CD3D.11   | 4.96E-52 | -2.202839455 | 0.157 | 0.485 | 1.14E-47 | 11 |
| TPT1.8    | 6.16E-52 | -0.784964475 | 0.949 | 0.923 | 1.42E-47 | 11 |
| GNB2L1.2  | 9.49E-52 | -0.947786419 | 0.825 | 0.836 | 2.18E-47 | 11 |
| RPL24.6   | 1.15E-51 | -0.957231435 | 0.863 | 0.852 | 2.64E-47 | 11 |
| TMEM50A.3 | 1.27E-51 | 0.763070344  | 0.634 | 0.327 | 2.93E-47 | 11 |
| CPD       | 2.09E-51 | 0.547751532  | 0.255 | 0.067 | 4.81E-47 | 11 |
| SLA.9     | 2.61E-51 | -1.633073013 | 0.058 | 0.411 | 6.00E-47 | 11 |
| HACD3     | 5.45E-51 | 0.596904974  | 0.262 | 0.072 | 1.25E-46 | 11 |
| VPS37A    | 6.76E-51 | 0.529407387  | 0.266 | 0.073 | 1.55E-46 | 11 |
| BSG.5     | 7.65E-51 | 0.592686902  | 0.645 | 0.318 | 1.76E-46 | 11 |
| ACTB.6    | 8.46E-51 | -0.908505393 | 0.965 | 0.928 | 1.94E-46 | 11 |

|                 |          |              |       |       |          |    |
|-----------------|----------|--------------|-------|-------|----------|----|
| SLC39A10.1      | 1.63E-50 | 0.537206656  | 0.306 | 0.093 | 3.75E-46 | 11 |
| SERINC1         | 1.67E-50 | 0.662529876  | 0.497 | 0.209 | 3.83E-46 | 11 |
| PKN2.1          | 2.38E-50 | 0.536551777  | 0.39  | 0.138 | 5.47E-46 | 11 |
| HLA-B.8         | 2.90E-50 | 0.512083475  | 0.998 | 0.911 | 6.66E-46 | 11 |
| LCP1.9          | 6.76E-50 | -1.567149761 | 0.071 | 0.415 | 1.55E-45 | 11 |
| PIIB.3          | 8.58E-50 | 0.668522828  | 0.805 | 0.477 | 1.97E-45 | 11 |
| GZMA.10         | 1.41E-49 | -2.446572978 | 0.098 | 0.43  | 3.24E-45 | 11 |
| RPS11.5         | 3.15E-49 | -0.83718436  | 0.889 | 0.854 | 7.24E-45 | 11 |
| ADD3.1          | 3.80E-49 | 0.607953108  | 0.424 | 0.159 | 8.72E-45 | 11 |
| TMEM59.3        | 3.97E-49 | 0.600472719  | 0.796 | 0.466 | 9.13E-45 | 11 |
| DYNC1I2.4       | 5.10E-49 | 0.562166608  | 0.528 | 0.234 | 1.17E-44 | 11 |
| SLIRP.6         | 5.54E-49 | 0.590236697  | 0.563 | 0.265 | 1.27E-44 | 11 |
| TMEM165.4       | 7.56E-49 | 0.624934109  | 0.523 | 0.229 | 1.74E-44 | 11 |
| BAZ2B.1         | 8.38E-49 | 0.661058252  | 0.404 | 0.152 | 1.93E-44 | 11 |
| ITGB2.9         | 8.48E-49 | -1.576789945 | 0.084 | 0.426 | 1.95E-44 | 11 |
| STK4.7          | 1.61E-48 | -1.659006165 | 0.153 | 0.483 | 3.70E-44 | 11 |
| RFC1.2          | 1.78E-48 | 0.684232047  | 0.446 | 0.179 | 4.08E-44 | 11 |
| MRPL33.2        | 1.85E-48 | 0.605477716  | 0.592 | 0.282 | 4.25E-44 | 11 |
| RILPL2          | 2.31E-48 | 0.597484244  | 0.47  | 0.194 | 5.31E-44 | 11 |
| RAPGEF1         | 2.51E-48 | 0.532052933  | 0.257 | 0.072 | 5.78E-44 | 11 |
| FMNL3.1         | 3.56E-48 | 0.530369933  | 0.255 | 0.071 | 8.18E-44 | 11 |
| CD48.9          | 4.03E-48 | -1.448904993 | 0.044 | 0.386 | 9.26E-44 | 11 |
| COX17.5         | 4.33E-48 | 0.679747017  | 0.603 | 0.309 | 9.96E-44 | 11 |
| CD3E.10         | 6.15E-48 | -1.730563059 | 0.073 | 0.408 | 1.41E-43 | 11 |
| IL2RG.11        | 9.93E-48 | -1.615098151 | 0.047 | 0.383 | 2.28E-43 | 11 |
| MT-ATP6.6       | 1.53E-47 | 0.563962015  | 0.98  | 0.855 | 3.51E-43 | 11 |
| CAPN2.1         | 2.62E-47 | 0.54960552   | 0.477 | 0.193 | 6.03E-43 | 11 |
| MT-CYB.7        | 3.56E-47 | 0.578202856  | 0.978 | 0.799 | 8.19E-43 | 11 |
| C1orf54.2       | 9.10E-47 | 0.563831624  | 0.271 | 0.081 | 2.09E-42 | 11 |
| KLF7.1          | 9.56E-47 | 0.538180261  | 0.277 | 0.085 | 2.20E-42 | 11 |
| UVRAG           | 1.13E-46 | 0.565631011  | 0.29  | 0.09  | 2.61E-42 | 11 |
| GUK1.3          | 1.84E-46 | 0.581723918  | 0.785 | 0.497 | 4.24E-42 | 11 |
| ENTPD1.1        | 5.92E-46 | 0.59913759   | 0.388 | 0.146 | 1.36E-41 | 11 |
| DYNLL1.5        | 1.80E-45 | 0.559620125  | 0.707 | 0.399 | 4.14E-41 | 11 |
| EIF1.2          | 4.22E-45 | -0.702986092 | 0.92  | 0.896 | 9.70E-41 | 11 |
| NKTR.8          | 5.56E-45 | 0.696289805  | 0.654 | 0.336 | 1.28E-40 | 11 |
| PRMT1           | 6.87E-45 | 0.502645629  | 0.41  | 0.16  | 1.58E-40 | 11 |
| BNIP2           | 9.25E-45 | 0.60858414   | 0.43  | 0.175 | 2.12E-40 | 11 |
| NCK1            | 1.73E-44 | 0.563615065  | 0.417 | 0.165 | 3.99E-40 | 11 |
| CYBA.7          | 2.69E-44 | -1.377738712 | 0.583 | 0.69  | 6.19E-40 | 11 |
| RP11-347P5.1.10 | 3.93E-44 | -1.79280684  | 0.067 | 0.386 | 9.02E-40 | 11 |
| RPL23.4         | 4.08E-44 | -0.906319345 | 0.823 | 0.817 | 9.38E-40 | 11 |
| AFF1            | 5.57E-44 | 0.584359495  | 0.302 | 0.1   | 1.28E-39 | 11 |
| COX5B.4         | 5.60E-44 | 0.52727149   | 0.812 | 0.537 | 1.29E-39 | 11 |
| GNAQ.2          | 8.38E-44 | 0.624423753  | 0.348 | 0.129 | 1.93E-39 | 11 |
| TAGLN2.8        | 1.27E-43 | 0.529356715  | 0.645 | 0.347 | 2.91E-39 | 11 |
| EFCAB14         | 1.92E-43 | 0.594460182  | 0.359 | 0.134 | 4.42E-39 | 11 |
| DENND3.1        | 2.16E-43 | 0.511802746  | 0.282 | 0.09  | 4.96E-39 | 11 |
| DAD1.4          | 3.13E-43 | 0.531975516  | 0.652 | 0.35  | 7.18E-39 | 11 |
| GNB1            | 3.50E-43 | 0.573488789  | 0.443 | 0.186 | 8.05E-39 | 11 |
| PDIA6.4         | 3.98E-43 | 0.592818434  | 0.588 | 0.296 | 9.14E-39 | 11 |
| ACAP1.11        | 4.30E-43 | -1.49406702  | 0.031 | 0.343 | 9.88E-39 | 11 |
| ITGAV.1         | 5.53E-43 | 0.515764283  | 0.251 | 0.076 | 1.27E-38 | 11 |
| IFITM1.2        | 5.94E-43 | 0.583924191  | 0.439 | 0.173 | 1.37E-38 | 11 |
| PCMTD1.1        | 6.16E-43 | 0.657543232  | 0.408 | 0.168 | 1.42E-38 | 11 |
| TM9SF3          | 6.37E-43 | 0.608978736  | 0.333 | 0.12  | 1.46E-38 | 11 |
| RAC2.11         | 9.65E-43 | -1.452972101 | 0.069 | 0.383 | 2.22E-38 | 11 |
| LMAN1           | 1.67E-42 | 0.524794757  | 0.439 | 0.182 | 3.84E-38 | 11 |

|            |          |              |       |       |          |    |
|------------|----------|--------------|-------|-------|----------|----|
| DUSP2.10   | 1.95E-42 | -2.238933616 | 0.146 | 0.441 | 4.49E-38 | 11 |
| ARF1.1     | 3.24E-42 | 0.534288786  | 0.696 | 0.399 | 7.44E-38 | 11 |
| KCNQ1OT1   | 3.67E-42 | 0.648984116  | 0.282 | 0.091 | 8.44E-38 | 11 |
| CST7.10    | 8.99E-42 | -2.080086261 | 0.1   | 0.399 | 2.07E-37 | 11 |
| OAZ1.7     | 1.12E-41 | -1.11649857  | 0.687 | 0.737 | 2.58E-37 | 11 |
| PRKAR1A.1  | 1.79E-41 | 0.530169513  | 0.532 | 0.252 | 4.12E-37 | 11 |
| RAB2A.4    | 2.50E-41 | 0.51680966   | 0.539 | 0.261 | 5.75E-37 | 11 |
| EVI2B.6    | 3.14E-41 | -1.36782926  | 0.04  | 0.345 | 7.22E-37 | 11 |
| DDIT4.7    | 4.25E-41 | 0.62153055   | 0.807 | 0.508 | 9.76E-37 | 11 |
| CAPNS1     | 8.30E-41 | 0.555625546  | 0.388 | 0.156 | 1.91E-36 | 11 |
| PDIA3.3    | 2.36E-40 | 0.636012168  | 0.707 | 0.417 | 5.43E-36 | 11 |
| CPM.2      | 3.98E-40 | 0.593682271  | 0.35  | 0.13  | 9.15E-36 | 11 |
| ATP1B3.8   | 5.11E-40 | 0.525358076  | 0.545 | 0.259 | 1.18E-35 | 11 |
| TRBC2.10   | 5.37E-40 | -1.887651792 | 0.093 | 0.386 | 1.23E-35 | 11 |
| GIMAP1     | 5.70E-40 | 0.537890252  | 0.377 | 0.145 | 1.31E-35 | 11 |
| AFF4       | 7.53E-40 | 0.513327194  | 0.392 | 0.159 | 1.73E-35 | 11 |
| EVL.10     | 8.75E-40 | -1.48647898  | 0.231 | 0.504 | 2.01E-35 | 11 |
| WASF2.5    | 9.68E-40 | 0.589599989  | 0.61  | 0.321 | 2.23E-35 | 11 |
| GNB2.2     | 1.83E-39 | 0.530068424  | 0.521 | 0.255 | 4.20E-35 | 11 |
| TMEM109.1  | 2.04E-39 | 0.533434233  | 0.386 | 0.157 | 4.70E-35 | 11 |
| FRYL       | 2.09E-38 | 0.509657933  | 0.341 | 0.128 | 4.81E-34 | 11 |
| STK17B.7   | 6.41E-38 | -1.445874104 | 0.122 | 0.41  | 1.47E-33 | 11 |
| NFE2L2.8   | 9.60E-38 | 0.565300988  | 0.523 | 0.254 | 2.21E-33 | 11 |
| GTF2I.2    | 1.17E-37 | 0.548797469  | 0.439 | 0.199 | 2.70E-33 | 11 |
| RAB5C.6    | 1.29E-37 | 0.520554219  | 0.521 | 0.26  | 2.97E-33 | 11 |
| CALM1.5    | 1.81E-37 | 0.693566394  | 0.827 | 0.588 | 4.15E-33 | 11 |
| CD99.7     | 1.83E-37 | 0.578106205  | 0.745 | 0.461 | 4.21E-33 | 11 |
| SPAG9      | 2.03E-37 | 0.564586979  | 0.348 | 0.139 | 4.66E-33 | 11 |
| UCP2.8     | 2.22E-37 | -1.290922713 | 0.067 | 0.356 | 5.10E-33 | 11 |
| CD3G.10    | 3.57E-37 | -1.530372722 | 0.024 | 0.302 | 8.20E-33 | 11 |
| PABPC1.6   | 1.74E-36 | -1.191796516 | 0.581 | 0.665 | 3.99E-32 | 11 |
| OS9.2      | 2.53E-36 | 0.501893508  | 0.463 | 0.217 | 5.82E-32 | 11 |
| RARRES3.9  | 9.71E-36 | -1.389122481 | 0.144 | 0.419 | 2.23E-31 | 11 |
| LITAF.8    | 1.02E-35 | -1.350342653 | 0.1   | 0.376 | 2.34E-31 | 11 |
| RPL17.8    | 1.30E-35 | -1.450277811 | 0.428 | 0.599 | 3.00E-31 | 11 |
| ANKRD11.2  | 1.95E-35 | 0.516936261  | 0.479 | 0.222 | 4.48E-31 | 11 |
| NPM1.5     | 2.15E-35 | -1.143910348 | 0.614 | 0.701 | 4.93E-31 | 11 |
| ISG15.1    | 3.93E-35 | 0.532234821  | 0.443 | 0.203 | 9.02E-31 | 11 |
| SYNE2.10   | 5.61E-35 | 0.559974256  | 0.634 | 0.322 | 1.29E-30 | 11 |
| CD53.6     | 1.22E-34 | -1.303558853 | 0.231 | 0.479 | 2.81E-30 | 11 |
| CANX.6     | 1.28E-34 | 0.510229966  | 0.557 | 0.291 | 2.95E-30 | 11 |
| RSF1.4     | 1.50E-34 | 0.506567814  | 0.508 | 0.248 | 3.44E-30 | 11 |
| EVI2A.7    | 4.68E-34 | -1.168104822 | 0.027 | 0.288 | 1.08E-29 | 11 |
| TNFAIP3.11 | 6.49E-34 | -1.655433959 | 0.206 | 0.455 | 1.49E-29 | 11 |
| TRBC1.10   | 8.16E-34 | -2.126226746 | 0.102 | 0.362 | 1.87E-29 | 11 |
| SAMSN1.5   | 1.31E-33 | -1.389521238 | 0.064 | 0.331 | 3.01E-29 | 11 |
| FTH1.10    | 1.98E-33 | -1.393073479 | 0.971 | 0.962 | 4.56E-29 | 11 |
| GPSM3.7    | 2.16E-33 | -1.219803498 | 0.137 | 0.399 | 4.96E-29 | 11 |
| TRAM1.2    | 2.49E-33 | 0.516796624  | 0.539 | 0.282 | 5.72E-29 | 11 |
| ETS2.2     | 2.74E-33 | 0.525829136  | 0.29  | 0.113 | 6.30E-29 | 11 |
| NKG7.11    | 3.52E-33 | -2.717729175 | 0.2   | 0.435 | 8.10E-29 | 11 |
| CCL4.11    | 3.76E-33 | -2.847419089 | 0.208 | 0.448 | 8.65E-29 | 11 |
| EMB.8      | 1.13E-32 | -1.13285552  | 0.024 | 0.277 | 2.59E-28 | 11 |
| LIMD2.10   | 1.17E-32 | -1.207013625 | 0.06  | 0.319 | 2.69E-28 | 11 |
| CD7.8      | 1.58E-32 | -1.560879231 | 0.051 | 0.308 | 3.63E-28 | 11 |
| STK17A.10  | 2.13E-32 | -1.336729021 | 0.12  | 0.375 | 4.90E-28 | 11 |
| SYTL3.10   | 2.16E-32 | -1.311929281 | 0.031 | 0.285 | 4.97E-28 | 11 |
| NR4A1.2    | 2.52E-32 | 0.618532938  | 0.288 | 0.11  | 5.80E-28 | 11 |

|              |          |              |       |       |          |    |
|--------------|----------|--------------|-------|-------|----------|----|
| LTB.10       | 3.08E-32 | -1.791995707 | 0.058 | 0.309 | 7.09E-28 | 11 |
| ALOX5AP.8    | 4.38E-32 | -1.638541064 | 0.084 | 0.337 | 1.01E-27 | 11 |
| RGS10.7      | 2.46E-31 | -1.201309396 | 0.053 | 0.303 | 5.65E-27 | 11 |
| MT2A.11      | 2.93E-30 | -2.238772762 | 0.492 | 0.665 | 6.72E-26 | 11 |
| FABP5.2      | 3.89E-30 | 1.35880573   | 0.397 | 0.2   | 8.95E-26 | 11 |
| TRAF3IP3.11  | 4.62E-30 | -1.09387776  | 0.027 | 0.263 | 1.06E-25 | 11 |
| EEF1B2.4     | 7.51E-30 | -1.050929982 | 0.588 | 0.664 | 1.73E-25 | 11 |
| GLIPR1.8     | 8.22E-30 | -1.125247984 | 0.062 | 0.307 | 1.89E-25 | 11 |
| COTL1.6      | 8.57E-30 | -1.532947382 | 0.228 | 0.441 | 1.97E-25 | 11 |
| IL32.10      | 2.69E-29 | -1.648673347 | 0.43  | 0.583 | 6.18E-25 | 11 |
| DOCK8.9      | 4.65E-29 | -1.051752232 | 0.062 | 0.299 | 1.07E-24 | 11 |
| BIRC3.9      | 5.22E-29 | -1.500067224 | 0.044 | 0.279 | 1.20E-24 | 11 |
| BIN2.8       | 1.03E-28 | -1.080541073 | 0.027 | 0.257 | 2.36E-24 | 11 |
| IKZF1.10     | 1.09E-28 | -1.009412355 | 0.022 | 0.251 | 2.51E-24 | 11 |
| MSN.5        | 1.41E-28 | 0.614745035  | 0.599 | 0.359 | 3.25E-24 | 11 |
| NACA.4       | 1.87E-28 | -0.760335632 | 0.838 | 0.802 | 4.30E-24 | 11 |
| EEF1D.7      | 2.25E-28 | -0.807756827 | 0.778 | 0.77  | 5.16E-24 | 11 |
| LCK.11       | 2.78E-28 | -1.149285242 | 0.06  | 0.295 | 6.40E-24 | 11 |
| PPDPF.7      | 2.80E-28 | -1.186220582 | 0.541 | 0.663 | 6.44E-24 | 11 |
| GZMK.11      | 6.58E-28 | -2.506440429 | 0.153 | 0.372 | 1.51E-23 | 11 |
| BTG2.7       | 6.78E-28 | -1.370164659 | 0.131 | 0.365 | 1.56E-23 | 11 |
| RGS2.10      | 1.27E-27 | -1.810912412 | 0.118 | 0.342 | 2.92E-23 | 11 |
| RPL22.5      | 2.02E-27 | -0.741215399 | 0.856 | 0.809 | 4.65E-23 | 11 |
| MYO1F.6      | 2.10E-27 | -0.97197129  | 0.049 | 0.279 | 4.84E-23 | 11 |
| IL10RA.8     | 2.25E-27 | -1.013385874 | 0.04  | 0.266 | 5.18E-23 | 11 |
| ADGRE5.9     | 6.31E-27 | -1.228639738 | 0.08  | 0.307 | 1.45E-22 | 11 |
| PNRC1.5      | 3.85E-26 | -1.097956728 | 0.55  | 0.637 | 8.85E-22 | 11 |
| IL7R.9       | 5.02E-26 | -2.22722197  | 0.095 | 0.31  | 1.15E-21 | 11 |
| PIK3IP1.10   | 5.78E-26 | -1.220258183 | 0.144 | 0.365 | 1.33E-21 | 11 |
| FAM49B.6     | 7.30E-26 | -1.090478938 | 0.124 | 0.347 | 1.68E-21 | 11 |
| APOBEC3G.9   | 1.50E-25 | -1.192292924 | 0.06  | 0.278 | 3.45E-21 | 11 |
| CD96.11      | 1.60E-25 | -1.120730314 | 0.044 | 0.256 | 3.69E-21 | 11 |
| RPL36AL.4    | 1.68E-25 | -0.912167812 | 0.676 | 0.713 | 3.85E-21 | 11 |
| EMP3.5       | 2.08E-25 | -1.230748981 | 0.18  | 0.397 | 4.78E-21 | 11 |
| SARAF.5      | 2.71E-25 | -1.009357733 | 0.636 | 0.679 | 6.23E-21 | 11 |
| DNAJB1.9     | 8.79E-25 | -1.608663425 | 0.231 | 0.426 | 2.02E-20 | 11 |
| TSTD1.4      | 8.96E-25 | -0.973972184 | 0.042 | 0.253 | 2.06E-20 | 11 |
| HMGB2.7      | 1.07E-24 | -1.22178796  | 0.279 | 0.483 | 2.45E-20 | 11 |
| SH3BGRL3.7   | 7.56E-24 | -1.042575598 | 0.661 | 0.682 | 1.74E-19 | 11 |
| MYH9.7       | 7.59E-24 | 0.507574479  | 0.525 | 0.304 | 1.74E-19 | 11 |
| SEPT6.8      | 1.27E-23 | -0.943226319 | 0.075 | 0.284 | 2.92E-19 | 11 |
| CLEC2D.10    | 1.87E-23 | -1.252592292 | 0.109 | 0.313 | 4.30E-19 | 11 |
| PIK3R1.8     | 1.88E-23 | -1.163771167 | 0.109 | 0.315 | 4.31E-19 | 11 |
| H3F3B.7      | 2.93E-23 | -0.701046587 | 0.902 | 0.832 | 6.73E-19 | 11 |
| CD27.10      | 6.56E-23 | -1.489062445 | 0.078 | 0.274 | 1.51E-18 | 11 |
| FTL.9        | 1.08E-22 | -1.478719975 | 0.949 | 0.937 | 2.48E-18 | 11 |
| PFDN5.3      | 1.08E-22 | -0.709042446 | 0.834 | 0.782 | 2.49E-18 | 11 |
| LY6E.7       | 3.16E-22 | -1.100300141 | 0.169 | 0.372 | 7.26E-18 | 11 |
| NBEAL1.4     | 3.69E-22 | -1.01199641  | 0.532 | 0.618 | 8.49E-18 | 11 |
| CRIP1.9      | 4.67E-22 | -1.303911127 | 0.102 | 0.3   | 1.07E-17 | 11 |
| AKNA.8       | 1.34E-21 | -0.967779139 | 0.073 | 0.267 | 3.08E-17 | 11 |
| ZFAS1.8      | 5.65E-21 | -1.232042837 | 0.326 | 0.489 | 1.30E-16 | 11 |
| HLA-DQA1.8   | 7.49E-21 | -1.960897968 | 0.173 | 0.349 | 1.72E-16 | 11 |
| ATP5G2.3     | 1.13E-19 | -0.896434284 | 0.63  | 0.656 | 2.60E-15 | 11 |
| AC090498.1.6 | 1.30E-19 | -1.210675986 | 0.364 | 0.505 | 2.99E-15 | 11 |
| RNASET2.10   | 2.06E-19 | -1.411611648 | 0.2   | 0.366 | 4.72E-15 | 11 |
| LDHB.7       | 3.05E-19 | -1.042957261 | 0.308 | 0.472 | 7.00E-15 | 11 |
| TOMM7.5      | 3.65E-19 | -0.727544762 | 0.789 | 0.753 | 8.38E-15 | 11 |



|             |          |              |       |       |          |    |
|-------------|----------|--------------|-------|-------|----------|----|
| COX7C.3     | 1.04E-18 | -0.747749226 | 0.772 | 0.753 | 2.38E-14 | 11 |
| PPP2R5C.9   | 1.57E-18 | -1.134156844 | 0.226 | 0.396 | 3.60E-14 | 11 |
| RCSD1.8     | 4.84E-18 | -0.781543523 | 0.082 | 0.255 | 1.11E-13 | 11 |
| ICAM3.10    | 6.56E-18 | -0.919038075 | 0.109 | 0.278 | 1.51E-13 | 11 |
| SRSF7.8     | 1.14E-17 | -1.129524995 | 0.439 | 0.548 | 2.61E-13 | 11 |
| SLC25A6.4   | 1.35E-17 | -0.860561542 | 0.641 | 0.656 | 3.11E-13 | 11 |
| TAF7.6      | 1.54E-17 | -0.883445896 | 0.151 | 0.326 | 3.53E-13 | 11 |
| SH3KBP1.8   | 5.96E-17 | -0.783400166 | 0.14  | 0.314 | 1.37E-12 | 11 |
| SNHG8.4     | 3.07E-16 | -1.013730273 | 0.302 | 0.439 | 7.06E-12 | 11 |
| SMAP2.7     | 3.38E-16 | -0.878247284 | 0.142 | 0.303 | 7.77E-12 | 11 |
| BTF3.2      | 3.92E-16 | -0.670134051 | 0.729 | 0.726 | 9.01E-12 | 11 |
| TUBA4A.9    | 4.90E-16 | -1.072736655 | 0.122 | 0.278 | 1.13E-11 | 11 |
| ANXA1.10    | 6.70E-16 | -1.354927359 | 0.355 | 0.475 | 1.54E-11 | 11 |
| MT1X.6      | 1.07E-15 | -2.393817935 | 0.129 | 0.288 | 2.45E-11 | 11 |
| RGS5.1      | 2.04E-15 | -0.645277295 | 0.255 | 0.122 | 4.70E-11 | 11 |
| WIPF1.11    | 2.23E-15 | -0.871381383 | 0.191 | 0.348 | 5.13E-11 | 11 |
| TYROBP.11   | 2.70E-15 | -2.074191762 | 0.282 | 0.391 | 6.19E-11 | 11 |
| GLUL.8      | 2.84E-15 | -1.333883114 | 0.166 | 0.311 | 6.54E-11 | 11 |
| GAPDH.7     | 3.78E-15 | -0.987265827 | 0.916 | 0.864 | 8.68E-11 | 11 |
| HMG2.3      | 4.28E-15 | -0.980406372 | 0.401 | 0.503 | 9.85E-11 | 11 |
| NAP1L1.3    | 8.64E-15 | -0.893452719 | 0.512 | 0.567 | 1.99E-10 | 11 |
| NR4A2.8     | 8.69E-15 | -1.013161199 | 0.131 | 0.281 | 2.00E-10 | 11 |
| AAK1.10     | 1.81E-14 | -0.860470194 | 0.228 | 0.375 | 4.17E-10 | 11 |
| FCER1G.11   | 2.01E-14 | -1.749557485 | 0.177 | 0.307 | 4.61E-10 | 11 |
| SERPINA1.10 | 9.21E-14 | -1.572872277 | 0.146 | 0.283 | 2.12E-09 | 11 |
| CITED2.9    | 1.11E-13 | -1.089250834 | 0.131 | 0.272 | 2.55E-09 | 11 |
| DUSP1.7     | 1.15E-13 | -0.829407113 | 0.887 | 0.79  | 2.64E-09 | 11 |
| JUN.7       | 1.32E-13 | -1.026259014 | 0.676 | 0.692 | 3.02E-09 | 11 |
| HCLS1.6     | 2.16E-13 | -0.814072257 | 0.191 | 0.327 | 4.96E-09 | 11 |
| ATP5L.2     | 2.83E-13 | -0.677712224 | 0.69  | 0.674 | 6.51E-09 | 11 |
| LEPROTL1.5  | 3.78E-13 | -0.95710508  | 0.266 | 0.393 | 8.68E-09 | 11 |
| ANKRD44.8   | 3.88E-13 | -0.736630645 | 0.122 | 0.263 | 8.93E-09 | 11 |
| PRPF38B.10  | 3.90E-13 | -0.882126472 | 0.326 | 0.439 | 8.97E-09 | 11 |
| TXNIP.9     | 9.02E-13 | -0.88479936  | 0.851 | 0.76  | 2.07E-08 | 11 |
| CCNH.8      | 1.15E-12 | -0.865206549 | 0.153 | 0.289 | 2.64E-08 | 11 |
| ANXA6.8     | 1.21E-12 | -0.821874865 | 0.122 | 0.254 | 2.77E-08 | 11 |
| SRGN.7      | 1.83E-12 | -0.649528826 | 0.858 | 0.789 | 4.21E-08 | 11 |
| CST3.10     | 6.51E-12 | -0.854031682 | 0.676 | 0.376 | 1.50E-07 | 11 |
| EEF2.4      | 8.49E-12 | -0.694899838 | 0.738 | 0.683 | 1.95E-07 | 11 |
| EZR.3       | 1.13E-11 | -0.847546577 | 0.204 | 0.328 | 2.59E-07 | 11 |
| COMMD6.4    | 1.59E-11 | -0.709037907 | 0.585 | 0.606 | 3.66E-07 | 11 |
| ENO1.9      | 1.79E-11 | -1.243674877 | 0.572 | 0.594 | 4.10E-07 | 11 |
| FNBP1.10    | 2.05E-11 | -0.783402905 | 0.251 | 0.371 | 4.72E-07 | 11 |
| IDS.8       | 2.36E-11 | -0.899939112 | 0.259 | 0.377 | 5.43E-07 | 11 |
| HLA-DQB1.9  | 4.13E-11 | -1.579452069 | 0.313 | 0.395 | 9.48E-07 | 11 |
| CMC1.9      | 6.93E-11 | -1.525656743 | 0.173 | 0.289 | 1.59E-06 | 11 |
| EIF3H.1     | 8.12E-11 | -0.737640509 | 0.361 | 0.454 | 1.87E-06 | 11 |
| PLP2.6      | 1.22E-10 | -0.809160858 | 0.182 | 0.299 | 2.80E-06 | 11 |
| HLA-DPB1.10 | 1.64E-10 | -1.718026087 | 0.672 | 0.631 | 3.76E-06 | 11 |
| FOS.9       | 1.69E-10 | -0.980555572 | 0.712 | 0.681 | 3.89E-06 | 11 |
| JUNB.10     | 1.87E-10 | -1.000542712 | 0.783 | 0.721 | 4.30E-06 | 11 |
| NNMT.11     | 4.40E-10 | -2.075165666 | 0.193 | 0.303 | 1.01E-05 | 11 |
| HLA-DRB1.11 | 4.48E-10 | -0.65264384  | 0.851 | 0.582 | 1.03E-05 | 11 |
| PRR13.1     | 5.80E-10 | -0.780086511 | 0.293 | 0.395 | 1.33E-05 | 11 |
| MCL1.6      | 6.07E-10 | -0.799952523 | 0.452 | 0.517 | 1.39E-05 | 11 |
| ZNF90.4     | 7.94E-10 | -0.803973439 | 0.248 | 0.357 | 1.82E-05 | 11 |
| MZT2A.7     | 1.50E-09 | -0.710207676 | 0.16  | 0.275 | 3.44E-05 | 11 |
| GLRX.4      | 2.33E-09 | -0.874783058 | 0.197 | 0.301 | 5.36E-05 | 11 |

|                 |           |              |       |       |             |    |
|-----------------|-----------|--------------|-------|-------|-------------|----|
| GLTSCR2.5       | 2.39E-09  | -0.668965502 | 0.548 | 0.589 | 5.50E-05    | 11 |
| C9orf142.8      | 3.23E-09  | -0.629525635 | 0.153 | 0.264 | 7.43E-05    | 11 |
| AIF1.11         | 3.85E-09  | -1.479435445 | 0.166 | 0.262 | 8.84E-05    | 11 |
| EIF3E.4         | 5.54E-09  | -0.746884451 | 0.528 | 0.545 | 0.000127395 | 11 |
| REL.7           | 5.66E-09  | -0.846182267 | 0.233 | 0.325 | 0.000130136 | 11 |
| YPEL5.9         | 9.20E-09  | -0.813599849 | 0.251 | 0.347 | 0.000211353 | 11 |
| NPC2.8          | 1.27E-08  | -0.518641841 | 0.61  | 0.371 | 0.000291591 | 11 |
| RPL22L1.2       | 2.39E-08  | -0.609082161 | 0.157 | 0.264 | 0.000549839 | 11 |
| ADIRF.8         | 4.68E-08  | -0.994996166 | 0.379 | 0.237 | 0.00107551  | 11 |
| EIF3M.4         | 7.05E-08  | -0.645216883 | 0.213 | 0.309 | 0.001619763 | 11 |
| EIF3L.4         | 1.12E-07  | -0.666125684 | 0.297 | 0.377 | 0.002584565 | 11 |
| EIF4A2.6        | 1.18E-07  | -0.670999778 | 0.565 | 0.58  | 0.002712731 | 11 |
| LYZ.10          | 1.27E-07  | -2.405024247 | 0.299 | 0.353 | 0.002913409 | 11 |
| VAMP8.5         | 2.21E-07  | -0.669980747 | 0.417 | 0.462 | 0.00508205  | 11 |
| ARID5B.5        | 2.25E-07  | -0.801607037 | 0.166 | 0.258 | 0.005181932 | 11 |
| SNRPD2.4        | 2.46E-07  | -0.679375093 | 0.525 | 0.558 | 0.005645875 | 11 |
| ZFP36.7         | 2.54E-07  | -0.717821961 | 0.694 | 0.662 | 0.005831663 | 11 |
| ARF6.6          | 2.62E-07  | -0.720678449 | 0.302 | 0.382 | 0.006012449 | 11 |
| OCIAD2.8        | 4.22E-07  | -0.761692784 | 0.177 | 0.264 | 0.009698135 | 11 |
| CYCS.5          | 4.23E-07  | -0.775677388 | 0.335 | 0.398 | 0.009729947 | 11 |
| CIB1.1          | 4.51E-07  | -0.634963317 | 0.304 | 0.39  | 0.010363001 | 11 |
| HIGD2A.1        | 6.06E-07  | -0.641738171 | 0.324 | 0.392 | 0.013921828 | 11 |
| TYMP.8          | 1.30E-06  | -0.890254428 | 0.226 | 0.298 | 0.029864072 | 11 |
| RTKN2           | 0         | 1.922615944  | 0.447 | 0.025 | 0           | 12 |
| FOXP3           | 0         | 1.415440225  | 0.389 | 0.013 | 0           | 12 |
| AC002331.1      | 2.01E-293 | 1.328993035  | 0.265 | 0.01  | 4.63E-289   | 12 |
| TIGIT.2         | 8.75E-254 | 2.125496457  | 0.718 | 0.12  | 2.01E-249   | 12 |
| TBC1D4.1        | 4.06E-249 | 1.792921766  | 0.576 | 0.076 | 9.33E-245   | 12 |
| TNFRSF18        | 1.29E-238 | 2.005002163  | 0.49  | 0.055 | 2.97E-234   | 12 |
| IL2RA           | 5.53E-228 | 1.330059727  | 0.305 | 0.021 | 1.27E-223   | 12 |
| BATF.1          | 6.24E-221 | 2.062059527  | 0.709 | 0.133 | 1.43E-216   | 12 |
| CTLA4           | 1.87E-187 | 1.454397681  | 0.447 | 0.057 | 4.29E-183   | 12 |
| LAIR2           | 4.85E-186 | 1.132287481  | 0.288 | 0.023 | 1.11E-181   | 12 |
| AC133644.2      | 2.36E-180 | 1.598190212  | 0.444 | 0.059 | 5.43E-176   | 12 |
| PMAIP1.4        | 2.80E-179 | 2.080686365  | 0.761 | 0.188 | 6.43E-175   | 12 |
| IL32.11         | 1.62E-155 | 2.051158177  | 0.974 | 0.568 | 3.72E-151   | 12 |
| LTB.11          | 1.76E-147 | 2.0092372    | 0.856 | 0.287 | 4.04E-143   | 12 |
| ICA1.1          | 6.74E-139 | 1.443521068  | 0.346 | 0.047 | 1.55E-134   | 12 |
| SLAMF1          | 1.35E-132 | 1.150139868  | 0.314 | 0.039 | 3.09E-128   | 12 |
| TNFRSF4.1       | 1.14E-128 | 1.743406696  | 0.395 | 0.064 | 2.62E-124   | 12 |
| HPGD            | 7.19E-128 | 1.269729972  | 0.346 | 0.048 | 1.65E-123   | 12 |
| CARD16.6        | 1.97E-125 | 1.769278643  | 0.784 | 0.305 | 4.54E-121   | 12 |
| ICOS.1          | 6.45E-118 | 1.403345218  | 0.438 | 0.083 | 1.48E-113   | 12 |
| TRAC.12         | 6.96E-114 | 1.491577709  | 0.939 | 0.419 | 1.60E-109   | 12 |
| BTG3.1          | 1.06E-106 | 1.551291691  | 0.582 | 0.164 | 2.44E-102   | 12 |
| CD27.11         | 1.90E-105 | 1.199457845  | 0.781 | 0.254 | 4.36E-101   | 12 |
| S100A4.10       | 7.88E-96  | 1.31108734   | 0.98  | 0.692 | 1.81E-91    | 12 |
| CORO1B.4        | 1.54E-90  | 1.514542419  | 0.625 | 0.23  | 3.53E-86    | 12 |
| RP11-347P5.1.11 | 3.47E-83  | 1.238934986  | 0.813 | 0.364 | 7.98E-79    | 12 |
| SELL            | 1.23E-82  | 1.086126971  | 0.38  | 0.085 | 2.82E-78    | 12 |
| UGP2.8          | 3.72E-81  | 1.394700504  | 0.706 | 0.316 | 8.55E-77    | 12 |
| ARID5B.6        | 1.40E-80  | 1.155297927  | 0.666 | 0.244 | 3.22E-76    | 12 |
| STAM            | 1.16E-79  | 0.888625005  | 0.262 | 0.044 | 2.67E-75    | 12 |
| SAMSN1.6        | 2.36E-74  | 1.125842697  | 0.723 | 0.312 | 5.42E-70    | 12 |
| CD79B           | 5.56E-73  | 0.845716913  | 0.277 | 0.052 | 1.28E-68    | 12 |
| BIRC3.10        | 2.56E-71  | 1.190455921  | 0.66  | 0.262 | 5.88E-67    | 12 |
| ENTPD1.2        | 1.71E-65  | 1.214602304  | 0.45  | 0.146 | 3.93E-61    | 12 |
| CD2.11          | 1.01E-62  | 0.938059472  | 0.89  | 0.446 | 2.33E-58    | 12 |

|                |          |              |       |       |          |    |
|----------------|----------|--------------|-------|-------|----------|----|
| TNFRSF9.3      | 4.76E-61 | 0.954412651  | 0.369 | 0.095 | 1.09E-56 | 12 |
| GBP2.5         | 3.48E-60 | 1.14546286   | 0.591 | 0.254 | 8.01E-56 | 12 |
| RGS1.12        | 2.44E-59 | 0.93121007   | 0.983 | 0.689 | 5.61E-55 | 12 |
| UCP2.9         | 1.18E-58 | 1.147163911  | 0.68  | 0.338 | 2.70E-54 | 12 |
| PHTF2.1        | 4.22E-58 | 0.97400432   | 0.366 | 0.104 | 9.69E-54 | 12 |
| CLEC2D.11      | 2.70E-56 | 1.22984907   | 0.651 | 0.298 | 6.20E-52 | 12 |
| CTSC.9         | 1.97E-55 | 1.068166322  | 0.68  | 0.338 | 4.54E-51 | 12 |
| SPOCK2.3       | 6.51E-55 | 0.931320663  | 0.571 | 0.226 | 1.50E-50 | 12 |
| RP11-138A9.1.1 | 2.13E-54 | 0.953051892  | 0.504 | 0.183 | 4.90E-50 | 12 |
| TSC22D3.8      | 1.94E-52 | 0.840797274  | 0.988 | 0.775 | 4.45E-48 | 12 |
| P2RY10.1       | 5.28E-52 | 0.839084322  | 0.326 | 0.089 | 1.21E-47 | 12 |
| CD3D.12        | 3.76E-51 | 0.801316944  | 0.885 | 0.464 | 8.64E-47 | 12 |
| NCK2           | 1.91E-50 | 0.765477166  | 0.28  | 0.07  | 4.38E-46 | 12 |
| IL2RG.12       | 1.08E-49 | 0.985926603  | 0.712 | 0.364 | 2.49E-45 | 12 |
| AC016831.7.1   | 3.08E-49 | 0.934276146  | 0.478 | 0.178 | 7.09E-45 | 12 |
| PBXIP1.2       | 2.29E-48 | 0.985537517  | 0.476 | 0.186 | 5.26E-44 | 12 |
| ISG20.9        | 2.67E-48 | 0.924653838  | 0.686 | 0.353 | 6.13E-44 | 12 |
| DNPH1          | 4.08E-48 | 0.966685443  | 0.386 | 0.132 | 9.38E-44 | 12 |
| TRBC2.11       | 4.06E-46 | 1.047073445  | 0.72  | 0.368 | 9.34E-42 | 12 |
| PRDM1.7        | 3.67E-45 | 0.969660572  | 0.608 | 0.284 | 8.44E-41 | 12 |
| PIK3IP1.11     | 5.30E-45 | 0.909407487  | 0.671 | 0.35  | 1.22E-40 | 12 |
| PHLDA1         | 5.38E-45 | 0.886771469  | 0.403 | 0.141 | 1.24E-40 | 12 |
| SKAP1.4        | 1.31E-43 | 0.890870231  | 0.458 | 0.178 | 3.02E-39 | 12 |
| CYTIP.10       | 1.02E-42 | 0.774322364  | 0.784 | 0.467 | 2.34E-38 | 12 |
| DUSP4.7        | 4.26E-42 | 0.842967289  | 0.553 | 0.233 | 9.79E-38 | 12 |
| FYB.10         | 1.08E-41 | 0.977811488  | 0.749 | 0.452 | 2.48E-37 | 12 |
| RPS26.8        | 1.65E-41 | 0.559436938  | 0.988 | 0.867 | 3.80E-37 | 12 |
| PIM2           | 6.78E-41 | 0.775855452  | 0.3   | 0.09  | 1.56E-36 | 12 |
| ARPC1B.4       | 3.03E-40 | 0.715797918  | 0.833 | 0.517 | 6.96E-36 | 12 |
| BTG1.11        | 4.36E-40 | 0.571486323  | 1     | 0.838 | 1.00E-35 | 12 |
| LINC00152.7    | 8.30E-40 | 0.785135138  | 0.614 | 0.309 | 1.91E-35 | 12 |
| HLA-A.8        | 3.03E-39 | 0.538641937  | 0.991 | 0.891 | 6.97E-35 | 12 |
| LCK.12         | 3.94E-39 | 0.730510827  | 0.602 | 0.279 | 9.05E-35 | 12 |
| SIRPG.2        | 8.42E-39 | 0.737851484  | 0.28  | 0.083 | 1.94E-34 | 12 |
| ARHGDIB.5      | 8.82E-39 | 0.716165936  | 0.919 | 0.666 | 2.03E-34 | 12 |
| RP11-138A9.2.1 | 2.03E-38 | 0.876557685  | 0.455 | 0.185 | 4.68E-34 | 12 |
| ACTB.7         | 3.59E-38 | 0.586295296  | 1     | 0.927 | 8.26E-34 | 12 |
| ANXA1.11       | 1.91E-37 | -1.8684194   | 0.127 | 0.48  | 4.39E-33 | 12 |
| CCL5.11        | 8.35E-37 | -2.741520623 | 0.294 | 0.569 | 1.92E-32 | 12 |
| KLF6.10        | 1.83E-36 | 0.706222049  | 0.919 | 0.642 | 4.22E-32 | 12 |
| CCNG2          | 4.57E-36 | 0.744725454  | 0.265 | 0.083 | 1.05E-31 | 12 |
| GATA3          | 8.13E-36 | 0.806655054  | 0.288 | 0.092 | 1.87E-31 | 12 |
| TNFAIP3.12     | 2.47E-35 | 0.700368568  | 0.752 | 0.439 | 5.67E-31 | 12 |
| GZMA.11        | 5.09E-35 | -2.085957015 | 0.104 | 0.427 | 1.17E-30 | 12 |
| DUSP10         | 8.27E-35 | 0.895385241  | 0.288 | 0.097 | 1.90E-30 | 12 |
| STAT3.8        | 3.57E-34 | 0.853300891  | 0.562 | 0.312 | 8.21E-30 | 12 |
| MIR4435-2HG.1  | 1.49E-33 | 0.696573885  | 0.369 | 0.146 | 3.41E-29 | 12 |
| USP15.5        | 1.82E-33 | 0.905793253  | 0.499 | 0.257 | 4.19E-29 | 12 |
| IPCEF1.1       | 2.31E-32 | 0.717856622  | 0.291 | 0.099 | 5.30E-28 | 12 |
| GADD45A        | 3.36E-32 | 0.688094605  | 0.291 | 0.101 | 7.73E-28 | 12 |
| CD3E.11        | 1.68E-31 | 0.608813189  | 0.723 | 0.389 | 3.87E-27 | 12 |
| ACP5.1         | 2.46E-31 | 0.677096676  | 0.28  | 0.098 | 5.66E-27 | 12 |
| RORA.2         | 1.89E-30 | 0.684516868  | 0.47  | 0.212 | 4.34E-26 | 12 |
| GCHFR          | 3.32E-30 | 0.737060216  | 0.363 | 0.151 | 7.62E-26 | 12 |
| CD7.9          | 2.04E-29 | 0.576790273  | 0.579 | 0.293 | 4.68E-25 | 12 |
| ICAM3.11       | 2.13E-29 | 0.676163024  | 0.519 | 0.266 | 4.90E-25 | 12 |
| ARL6IP5.8      | 2.68E-29 | 0.68638535   | 0.695 | 0.452 | 6.15E-25 | 12 |
| RAC2.12        | 6.63E-29 | 0.694072748  | 0.634 | 0.366 | 1.52E-24 | 12 |

|            |          |              |       |       |          |    |
|------------|----------|--------------|-------|-------|----------|----|
| FAM129A.2  | 2.34E-28 | 0.792501548  | 0.421 | 0.2   | 5.37E-24 | 12 |
| NKG7.12    | 2.43E-28 | -2.483068296 | 0.159 | 0.434 | 5.57E-24 | 12 |
| GBP5.1     | 3.40E-28 | 0.727073614  | 0.277 | 0.1   | 7.81E-24 | 12 |
| CCL4.12    | 5.18E-28 | -2.823262997 | 0.179 | 0.446 | 1.19E-23 | 12 |
| STK17B.8   | 2.26E-27 | 0.674134251  | 0.646 | 0.394 | 5.19E-23 | 12 |
| ITM2A.11   | 4.55E-27 | 0.607706104  | 0.585 | 0.303 | 1.05E-22 | 12 |
| PTPRC.11   | 5.38E-27 | 0.527890175  | 0.893 | 0.609 | 1.24E-22 | 12 |
| GMFG.5     | 1.27E-26 | 0.542551803  | 0.801 | 0.55  | 2.92E-22 | 12 |
| CCNI.1     | 1.48E-26 | 0.580847514  | 0.824 | 0.587 | 3.40E-22 | 12 |
| CALM3.5    | 1.60E-26 | 0.601327203  | 0.539 | 0.307 | 3.69E-22 | 12 |
| PHACTR2.1  | 1.83E-26 | 0.606576709  | 0.277 | 0.104 | 4.21E-22 | 12 |
| GLRX.5     | 2.55E-26 | 0.586461647  | 0.516 | 0.292 | 5.86E-22 | 12 |
| TRBC1.11   | 9.54E-26 | 1.016873689  | 0.585 | 0.347 | 2.19E-21 | 12 |
| SRSF7.9    | 1.69E-25 | 0.586583065  | 0.764 | 0.539 | 3.89E-21 | 12 |
| FCMR       | 3.83E-25 | 0.564386109  | 0.256 | 0.092 | 8.81E-21 | 12 |
| CYCS.6     | 5.25E-25 | 0.639532331  | 0.617 | 0.391 | 1.21E-20 | 12 |
| C9orf16.3  | 5.43E-25 | 0.670965547  | 0.556 | 0.344 | 1.25E-20 | 12 |
| CD44.8     | 7.14E-25 | 0.565348567  | 0.746 | 0.485 | 1.64E-20 | 12 |
| LAT.3      | 1.32E-24 | 0.598634471  | 0.366 | 0.162 | 3.04E-20 | 12 |
| RASGRP1.2  | 1.71E-24 | 0.612935238  | 0.305 | 0.123 | 3.94E-20 | 12 |
| ZBTB38.3   | 5.89E-24 | 0.632687322  | 0.447 | 0.232 | 1.35E-19 | 12 |
| WHSC1L1.6  | 1.28E-23 | 0.680572015  | 0.441 | 0.235 | 2.95E-19 | 12 |
| GZMK.12    | 1.32E-23 | -2.190954147 | 0.124 | 0.372 | 3.04E-19 | 12 |
| TNFRSF1B.2 | 1.58E-23 | 0.702791136  | 0.429 | 0.228 | 3.62E-19 | 12 |
| IQGAP1.5   | 1.63E-23 | 0.722500238  | 0.542 | 0.333 | 3.75E-19 | 12 |
| PELI1      | 1.78E-23 | 0.711119442  | 0.268 | 0.11  | 4.10E-19 | 12 |
| ANAPC16.3  | 2.99E-23 | 0.523166501  | 0.735 | 0.534 | 6.87E-19 | 12 |
| UBE2D2.2   | 3.20E-23 | 0.588694541  | 0.591 | 0.38  | 7.36E-19 | 12 |
| CD53.7     | 5.35E-23 | 0.5696824    | 0.692 | 0.465 | 1.23E-18 | 12 |
| HSPA8.6    | 1.43E-22 | 0.609857977  | 0.761 | 0.549 | 3.28E-18 | 12 |
| ALOX5AP.9  | 4.46E-22 | -1.482093768 | 0.095 | 0.335 | 1.03E-17 | 12 |
| CREB3L2    | 1.40E-21 | 0.635912428  | 0.259 | 0.108 | 3.22E-17 | 12 |
| RHOH.4     | 1.62E-21 | 0.678970471  | 0.418 | 0.222 | 3.72E-17 | 12 |
| CASP1.1    | 2.69E-21 | 0.658889896  | 0.38  | 0.2   | 6.18E-17 | 12 |
| TYROBP.12  | 4.98E-21 | -2.156934937 | 0.173 | 0.393 | 1.14E-16 | 12 |
| CLPP.2     | 5.73E-21 | 0.577976488  | 0.372 | 0.186 | 1.32E-16 | 12 |
| HTATIP2    | 1.28E-20 | 0.609733967  | 0.268 | 0.118 | 2.95E-16 | 12 |
| BUB3.8     | 1.31E-20 | 0.590136131  | 0.467 | 0.266 | 3.01E-16 | 12 |
| EVI2A.8    | 4.57E-20 | 0.679711688  | 0.467 | 0.275 | 1.05E-15 | 12 |
| CD63.10    | 7.85E-20 | -1.363945929 | 0.337 | 0.524 | 1.80E-15 | 12 |
| DDX24.8    | 9.78E-20 | 0.521167901  | 0.657 | 0.452 | 2.25E-15 | 12 |
| SEPT6.9    | 1.44E-19 | 0.627386636  | 0.461 | 0.273 | 3.31E-15 | 12 |
| GLUL.9     | 2.23E-19 | -1.420709421 | 0.092 | 0.312 | 5.14E-15 | 12 |
| EPSTI1.1   | 2.98E-19 | 0.623704318  | 0.277 | 0.127 | 6.85E-15 | 12 |
| SLA.10     | 3.66E-19 | 0.551726932  | 0.605 | 0.394 | 8.42E-15 | 12 |
| CHST11     | 8.75E-19 | 0.577825823  | 0.349 | 0.18  | 2.01E-14 | 12 |
| CLIP1      | 1.16E-18 | 0.673389493  | 0.3   | 0.147 | 2.66E-14 | 12 |
| RSBN1.1    | 1.29E-18 | 0.59710082   | 0.334 | 0.167 | 2.97E-14 | 12 |
| RAP1A.5    | 2.07E-18 | 0.550465466  | 0.522 | 0.346 | 4.77E-14 | 12 |
| CEBPD.7    | 2.49E-18 | -1.357546513 | 0.078 | 0.284 | 5.71E-14 | 12 |
| GALM.3     | 2.78E-18 | 0.581394838  | 0.326 | 0.161 | 6.40E-14 | 12 |
| RHBDD2     | 2.04E-17 | 0.60343734   | 0.251 | 0.113 | 4.68E-13 | 12 |
| IL10RA.9   | 5.12E-17 | 0.560447811  | 0.429 | 0.254 | 1.18E-12 | 12 |
| AKIRIN2.1  | 5.39E-17 | 0.576403808  | 0.346 | 0.186 | 1.24E-12 | 12 |
| GSTP1.6    | 7.68E-17 | -1.175242026 | 0.294 | 0.494 | 1.76E-12 | 12 |
| NABP1.1    | 1.26E-16 | 0.578957972  | 0.34  | 0.184 | 2.89E-12 | 12 |
| GIMAP4.8   | 5.08E-16 | -0.877183235 | 0.133 | 0.344 | 1.17E-11 | 12 |
| RAB9A      | 2.34E-15 | 0.570923658  | 0.254 | 0.121 | 5.38E-11 | 12 |

|             |          |              |       |       |             |    |
|-------------|----------|--------------|-------|-------|-------------|----|
| GIMAP7.11   | 5.64E-15 | -0.948617089 | 0.098 | 0.289 | 1.30E-10    | 12 |
| ZNF292.2    | 5.70E-15 | 0.572100524  | 0.329 | 0.182 | 1.31E-10    | 12 |
| PPM1G.1     | 1.28E-14 | 0.504858087  | 0.372 | 0.222 | 2.94E-10    | 12 |
| RNF145.2    | 2.26E-14 | 0.566124578  | 0.375 | 0.227 | 5.20E-10    | 12 |
| CST3.11     | 2.36E-14 | -2.053292661 | 0.231 | 0.389 | 5.43E-10    | 12 |
| CDV3        | 3.38E-14 | 0.50108445   | 0.294 | 0.157 | 7.78E-10    | 12 |
| FTH1.11     | 6.97E-14 | -1.242249404 | 0.983 | 0.962 | 1.60E-09    | 12 |
| FCER1G.12   | 7.65E-14 | -1.649508279 | 0.141 | 0.307 | 1.76E-09    | 12 |
| NR3C1.3     | 1.25E-13 | 0.578738354  | 0.372 | 0.228 | 2.88E-09    | 12 |
| DEF6.1      | 2.32E-13 | 0.503014597  | 0.297 | 0.163 | 5.34E-09    | 12 |
| SERPINA1.11 | 7.07E-13 | -1.589468011 | 0.121 | 0.282 | 1.63E-08    | 12 |
| CLEC2B.6    | 1.04E-12 | -0.765314533 | 0.19  | 0.383 | 2.39E-08    | 12 |
| IFNGR1.9    | 2.98E-12 | -0.924556376 | 0.101 | 0.263 | 6.84E-08    | 12 |
| WNK1.7      | 5.58E-12 | 0.523037744  | 0.383 | 0.246 | 1.28E-07    | 12 |
| IFITM3.11   | 8.68E-12 | -1.644245303 | 0.219 | 0.382 | 2.00E-07    | 12 |
| BCL2.2      | 1.15E-11 | 0.505211044  | 0.294 | 0.168 | 2.65E-07    | 12 |
| ZC3H7A.2    | 3.72E-11 | 0.555400985  | 0.271 | 0.156 | 8.56E-07    | 12 |
| RGS2.11     | 7.10E-11 | -1.274901757 | 0.187 | 0.339 | 1.63E-06    | 12 |
| DSTN.10     | 7.35E-11 | -1.123307599 | 0.15  | 0.311 | 1.69E-06    | 12 |
| RHOB.10     | 7.73E-11 | -1.252858636 | 0.199 | 0.352 | 1.78E-06    | 12 |
| CRYAB.11    | 1.07E-10 | -1.848904496 | 0.112 | 0.263 | 2.47E-06    | 12 |
| RNASET2.11  | 5.15E-10 | -1.079559903 | 0.225 | 0.364 | 1.18E-05    | 12 |
| CEBPB.9     | 1.30E-09 | -1.007693251 | 0.19  | 0.332 | 2.98E-05    | 12 |
| CTSB.10     | 3.29E-09 | -0.974994748 | 0.17  | 0.306 | 7.56E-05    | 12 |
| HSD17B11.5  | 3.59E-09 | -0.581539498 | 0.11  | 0.256 | 8.26E-05    | 12 |
| GRN.11      | 4.31E-09 | -1.037010208 | 0.13  | 0.257 | 9.91E-05    | 12 |
| FTL.10      | 6.61E-09 | -1.314559218 | 0.98  | 0.936 | 0.00015187  | 12 |
| CMC1.10     | 8.98E-09 | -1.406042303 | 0.161 | 0.288 | 0.000206375 | 12 |
| CANX.7      | 1.76E-08 | -0.646267408 | 0.159 | 0.303 | 0.000404967 | 12 |
| SOD2.9      | 2.77E-08 | -1.210749749 | 0.161 | 0.297 | 0.000635428 | 12 |
| LITAF.9     | 4.58E-08 | -0.648157091 | 0.228 | 0.371 | 0.001053351 | 12 |
| AIF1.12     | 6.08E-08 | -1.417577467 | 0.153 | 0.262 | 0.001397945 | 12 |
| ANXA2.6     | 8.13E-08 | -0.947694884 | 0.274 | 0.396 | 0.001868089 | 12 |
| LYZ.11      | 9.89E-08 | -2.298613325 | 0.259 | 0.353 | 0.002271846 | 12 |
| NNMT.12     | 3.37E-07 | -1.930187514 | 0.187 | 0.302 | 0.007743329 | 12 |
| NDUFA4L2.11 | 7.44E-07 | -2.017554902 | 0.184 | 0.291 | 0.017104376 | 12 |
| CD99.8      | 1.02E-06 | -0.584861506 | 0.34  | 0.473 | 0.023351891 | 12 |
| ANXA5.7     | 1.32E-06 | -0.586689779 | 0.228 | 0.355 | 0.030380295 | 12 |
| SDCBP.9     | 1.43E-06 | -0.657093017 | 0.259 | 0.375 | 0.032953911 | 12 |
| FCN1.1      | 0        | 3.498257796  | 0.974 | 0.063 | 0           | 13 |
| LST1.4      | 0        | 2.927502523  | 0.997 | 0.209 | 0           | 13 |
| CSTA.3      | 0        | 2.449493083  | 0.913 | 0.114 | 0           | 13 |
| IL1B        | 0        | 2.423356907  | 0.547 | 0.032 | 0           | 13 |
| VCAN        | 0        | 2.407132094  | 0.595 | 0.048 | 0           | 13 |
| S100A12     | 0        | 2.293388615  | 0.489 | 0.026 | 0           | 13 |
| LINC01272   | 0        | 2.239033047  | 0.803 | 0.044 | 0           | 13 |
| MS4A7.2     | 0        | 2.180765321  | 0.896 | 0.135 | 0           | 13 |
| CFP         | 0        | 1.846737711  | 0.744 | 0.022 | 0           | 13 |
| BCL2A1      | 0        | 1.822457164  | 0.767 | 0.072 | 0           | 13 |
| SPI1.2      | 0        | 1.718500325  | 0.867 | 0.126 | 0           | 13 |
| SLC11A1.2   | 0        | 1.712078043  | 0.848 | 0.115 | 0           | 13 |
| LILRB2.2    | 0        | 1.70265363   | 0.657 | 0.046 | 0           | 13 |
| C5AR1.2     | 0        | 1.660663381  | 0.693 | 0.07  | 0           | 13 |
| CLEC12A.2   | 0        | 1.636672998  | 0.715 | 0.071 | 0           | 13 |
| CLEC7A.2    | 0        | 1.578710304  | 0.845 | 0.119 | 0           | 13 |
| NCF2.2      | 0        | 1.562423039  | 0.78  | 0.071 | 0           | 13 |
| LILRA5      | 0        | 1.417416358  | 0.563 | 0.015 | 0           | 13 |
| MPEG1.1     | 0        | 1.35086368   | 0.576 | 0.04  | 0           | 13 |

|                 |           |             |       |       |           |    |
|-----------------|-----------|-------------|-------|-------|-----------|----|
| APOBEC3A        | 0         | 1.253837357 | 0.44  | 0.013 | 0         | 13 |
| CTB-61M7.2      | 0         | 1.089422911 | 0.359 | 0.007 | 0         | 13 |
| FPR2            | 0         | 1.065011761 | 0.421 | 0.01  | 0         | 13 |
| C19orf38        | 0         | 1.053179539 | 0.447 | 0.026 | 0         | 13 |
| CD300E          | 0         | 1.041334547 | 0.379 | 0.01  | 0         | 13 |
| CYP1B1          | 0         | 0.986677983 | 0.294 | 0.008 | 0         | 13 |
| KCNE1           | 0         | 0.874286046 | 0.35  | 0.015 | 0         | 13 |
| LILRA1          | 0         | 0.86517866  | 0.382 | 0.012 | 0         | 13 |
| CFD.2           | 2.56E-304 | 1.945107936 | 0.841 | 0.124 | 5.89E-300 | 13 |
| EREG            | 4.89E-301 | 1.73581645  | 0.366 | 0.02  | 1.12E-296 | 13 |
| GPBAR1          | 1.42E-297 | 0.522190091 | 0.252 | 0.008 | 3.27E-293 | 13 |
| FPR1.2          | 4.56E-287 | 1.544480444 | 0.683 | 0.084 | 1.05E-282 | 13 |
| PILRA.2         | 8.44E-286 | 1.378139615 | 0.673 | 0.082 | 1.94E-281 | 13 |
| HCK.2           | 2.31E-281 | 1.290739161 | 0.625 | 0.072 | 5.30E-277 | 13 |
| AQP9            | 6.07E-281 | 0.732223128 | 0.291 | 0.012 | 1.39E-276 | 13 |
| FGR.2           | 5.43E-280 | 1.476135554 | 0.735 | 0.101 | 1.25E-275 | 13 |
| KLF4.1          | 5.58E-279 | 1.62404246  | 0.764 | 0.106 | 1.28E-274 | 13 |
| PLAUR.2         | 1.74E-278 | 2.026750718 | 0.754 | 0.108 | 3.99E-274 | 13 |
| CLEC4E.2        | 4.28E-276 | 1.990879078 | 0.715 | 0.096 | 9.83E-272 | 13 |
| RGS18.2         | 1.84E-260 | 1.281709162 | 0.65  | 0.082 | 4.22E-256 | 13 |
| AIF1.13         | 1.60E-258 | 2.466580245 | 0.99  | 0.243 | 3.68E-254 | 13 |
| CPPED1          | 9.06E-258 | 1.127576302 | 0.563 | 0.061 | 2.08E-253 | 13 |
| NAMPT.3         | 4.47E-257 | 2.19593772  | 0.955 | 0.217 | 1.03E-252 | 13 |
| IFI30.2         | 1.01E-254 | 1.583943201 | 0.702 | 0.098 | 2.33E-250 | 13 |
| CYBB.2          | 1.18E-251 | 1.402575753 | 0.751 | 0.11  | 2.72E-247 | 13 |
| SLC7A7.2        | 6.33E-248 | 1.389393056 | 0.657 | 0.089 | 1.45E-243 | 13 |
| IRAK3.2         | 7.51E-248 | 1.255861978 | 0.634 | 0.083 | 1.73E-243 | 13 |
| AP1S2.4         | 1.86E-241 | 1.898598541 | 0.935 | 0.209 | 4.26E-237 | 13 |
| FCER1G.13       | 1.04E-237 | 2.460973259 | 1     | 0.287 | 2.38E-233 | 13 |
| MAFB.2          | 3.50E-234 | 1.539726215 | 0.761 | 0.118 | 8.04E-230 | 13 |
| S100A9.11       | 8.37E-234 | 3.181208843 | 0.951 | 0.235 | 1.92E-229 | 13 |
| SLC31A2.2       | 1.08E-232 | 1.418236274 | 0.65  | 0.094 | 2.47E-228 | 13 |
| CTSS.10         | 3.17E-230 | 2.82150287  | 0.99  | 0.349 | 7.29E-226 | 13 |
| LILRB3.2        | 3.30E-229 | 1.106513151 | 0.557 | 0.067 | 7.59E-225 | 13 |
| VNN1            | 5.02E-227 | 1.119773834 | 0.356 | 0.026 | 1.15E-222 | 13 |
| ADGRE2.2        | 4.43E-226 | 0.981973503 | 0.476 | 0.049 | 1.02E-221 | 13 |
| LYN.2           | 2.21E-224 | 1.288315982 | 0.696 | 0.109 | 5.09E-220 | 13 |
| CLEC4A.2        | 2.93E-223 | 0.995670015 | 0.492 | 0.054 | 6.72E-219 | 13 |
| TKT.3           | 2.15E-222 | 1.814645703 | 0.896 | 0.213 | 4.94E-218 | 13 |
| C1orf162.3      | 1.94E-220 | 1.68570979  | 0.929 | 0.197 | 4.45E-216 | 13 |
| CEACAM4         | 6.77E-220 | 0.622434893 | 0.288 | 0.017 | 1.56E-215 | 13 |
| MARCH1.2        | 2.52E-219 | 1.216747138 | 0.625 | 0.089 | 5.80E-215 | 13 |
| SULT1A1         | 2.53E-218 | 0.82110759  | 0.424 | 0.039 | 5.82E-214 | 13 |
| STX11.1         | 5.25E-218 | 1.111547512 | 0.553 | 0.068 | 1.21E-213 | 13 |
| MTSS1           | 2.81E-217 | 1.143204546 | 0.54  | 0.065 | 6.45E-213 | 13 |
| GCA.2           | 5.38E-216 | 1.248783574 | 0.696 | 0.114 | 1.24E-211 | 13 |
| ABHD5           | 3.94E-215 | 1.008831992 | 0.447 | 0.044 | 9.06E-211 | 13 |
| TREM1           | 9.04E-215 | 1.040512361 | 0.414 | 0.038 | 2.08E-210 | 13 |
| RP6-159A1.4     | 5.07E-214 | 0.673862498 | 0.285 | 0.017 | 1.17E-209 | 13 |
| ARL4A.1         | 9.65E-213 | 1.739986296 | 0.806 | 0.162 | 2.22E-208 | 13 |
| FAM26F.2        | 9.39E-209 | 1.617844322 | 0.718 | 0.121 | 2.16E-204 | 13 |
| LRRC25.2        | 1.08E-207 | 1.076413718 | 0.492 | 0.059 | 2.47E-203 | 13 |
| MNDA.3          | 1.31E-198 | 1.536031866 | 0.728 | 0.128 | 3.02E-194 | 13 |
| KYNU.2          | 4.62E-195 | 0.991258486 | 0.453 | 0.052 | 1.06E-190 | 13 |
| LYZ.12          | 1.98E-194 | 3.133548088 | 0.994 | 0.337 | 4.56E-190 | 13 |
| DUSP6.1         | 3.16E-194 | 1.430520482 | 0.647 | 0.106 | 7.26E-190 | 13 |
| RNF144B.2       | 4.89E-193 | 1.254763864 | 0.524 | 0.072 | 1.12E-188 | 13 |
| RP11-1143G9.4.2 | 8.27E-193 | 1.958964106 | 0.657 | 0.111 | 1.90E-188 | 13 |

|             |           |             |       |       |           |    |
|-------------|-----------|-------------|-------|-------|-----------|----|
| S100A8.3    | 6.06E-191 | 2.796781491 | 0.832 | 0.197 | 1.39E-186 | 13 |
| TYROBP.13   | 6.22E-190 | 2.137773948 | 1     | 0.374 | 1.43E-185 | 13 |
| STXBP2.1    | 1.54E-188 | 1.542116406 | 0.796 | 0.175 | 3.53E-184 | 13 |
| CD55.1      | 3.02E-183 | 1.352353856 | 0.79  | 0.167 | 6.95E-179 | 13 |
| SERPINA1.12 | 3.98E-183 | 1.331431485 | 0.961 | 0.263 | 9.14E-179 | 13 |
| TCF7L2      | 2.21E-182 | 0.910312089 | 0.346 | 0.031 | 5.07E-178 | 13 |
| TNFSF13B.2  | 4.05E-178 | 1.365914399 | 0.657 | 0.119 | 9.31E-174 | 13 |
| ASAH1.6     | 5.45E-176 | 1.496180365 | 0.874 | 0.226 | 1.25E-171 | 13 |
| MXD1        | 7.13E-175 | 1.07124521  | 0.534 | 0.077 | 1.64E-170 | 13 |
| CD68.3      | 1.14E-172 | 1.227501657 | 0.832 | 0.182 | 2.63E-168 | 13 |
| IRS2.2      | 2.27E-171 | 1.210671059 | 0.579 | 0.096 | 5.21E-167 | 13 |
| FAM49A.1    | 8.71E-169 | 0.906794132 | 0.434 | 0.054 | 2.00E-164 | 13 |
| ASGR1       | 1.77E-168 | 0.751061635 | 0.304 | 0.026 | 4.07E-164 | 13 |
| CD302.2     | 1.92E-168 | 1.12461056  | 0.65  | 0.114 | 4.41E-164 | 13 |
| ZEB2.6      | 1.31E-167 | 1.479179004 | 0.867 | 0.226 | 3.00E-163 | 13 |
| LGALS2.2    | 2.38E-165 | 1.270911765 | 0.563 | 0.09  | 5.48E-161 | 13 |
| MTMR11      | 5.08E-165 | 0.587946774 | 0.272 | 0.021 | 1.17E-160 | 13 |
| CD36        | 2.25E-163 | 0.677999923 | 0.401 | 0.045 | 5.16E-159 | 13 |
| POU2F2.2    | 1.10E-160 | 1.190428398 | 0.505 | 0.078 | 2.53E-156 | 13 |
| COTL1.7     | 1.96E-160 | 1.890011656 | 0.99  | 0.422 | 4.50E-156 | 13 |
| RAB31.3     | 5.57E-159 | 1.1498402   | 0.628 | 0.119 | 1.28E-154 | 13 |
| LILRA2.2    | 9.60E-158 | 0.7865011   | 0.366 | 0.041 | 2.21E-153 | 13 |
| FGL2.2      | 1.80E-157 | 1.210566873 | 0.696 | 0.138 | 4.14E-153 | 13 |
| LRRK2.2     | 1.66E-156 | 0.818449325 | 0.45  | 0.063 | 3.82E-152 | 13 |
| ARHGEF40.1  | 2.22E-155 | 1.021676299 | 0.337 | 0.036 | 5.09E-151 | 13 |
| NUDT16.2    | 7.74E-155 | 1.269493113 | 0.686 | 0.147 | 1.78E-150 | 13 |
| PHACTR1.2   | 2.83E-154 | 1.126476641 | 0.489 | 0.074 | 6.49E-150 | 13 |
| THBS1.1     | 2.30E-152 | 2.004786657 | 0.427 | 0.058 | 5.28E-148 | 13 |
| C9orf72.2   | 2.11E-151 | 0.824613847 | 0.434 | 0.06  | 4.85E-147 | 13 |
| NAAA.2      | 2.64E-151 | 1.1829942   | 0.579 | 0.106 | 6.07E-147 | 13 |
| SAT1.10     | 1.16E-149 | 2.184771169 | 1     | 0.623 | 2.66E-145 | 13 |
| RGS2.12     | 1.59E-149 | 1.609597637 | 0.964 | 0.321 | 3.66E-145 | 13 |
| ETS2.3      | 3.02E-149 | 1.152481463 | 0.576 | 0.108 | 6.94E-145 | 13 |
| SCIMP.2     | 2.94E-142 | 0.792820411 | 0.398 | 0.054 | 6.76E-138 | 13 |
| LINC00936.1 | 9.46E-142 | 0.976554179 | 0.515 | 0.085 | 2.17E-137 | 13 |
| CEBPB.10    | 2.11E-141 | 1.460266883 | 0.929 | 0.315 | 4.85E-137 | 13 |
| C10orf54.8  | 1.35E-140 | 1.395188578 | 0.874 | 0.268 | 3.11E-136 | 13 |
| FTH1.12     | 7.61E-139 | 1.614811075 | 1     | 0.961 | 1.75E-134 | 13 |
| PYCARD.7    | 4.81E-138 | 1.204334463 | 0.832 | 0.234 | 1.11E-133 | 13 |
| MTPN.3      | 1.25E-137 | 1.18984889  | 0.783 | 0.211 | 2.88E-133 | 13 |
| LGALS9.2    | 7.01E-137 | 0.878008276 | 0.573 | 0.11  | 1.61E-132 | 13 |
| LY96.2      | 7.28E-137 | 0.957474975 | 0.573 | 0.111 | 1.67E-132 | 13 |
| CD163.2     | 1.28E-136 | 1.208167582 | 0.589 | 0.115 | 2.93E-132 | 13 |
| TYMP.9      | 1.68E-136 | 1.368425821 | 0.893 | 0.282 | 3.85E-132 | 13 |
| ZFAND5.7    | 2.66E-134 | 1.724508424 | 0.867 | 0.295 | 6.12E-130 | 13 |
| FCGR2A.2    | 3.35E-133 | 0.822715801 | 0.65  | 0.129 | 7.70E-129 | 13 |
| BRI3.3      | 7.84E-132 | 1.022524601 | 0.66  | 0.151 | 1.80E-127 | 13 |
| CNIH4       | 3.84E-131 | 1.041888724 | 0.608 | 0.13  | 8.83E-127 | 13 |
| CEBPD.8     | 4.59E-129 | 1.326809624 | 0.883 | 0.265 | 1.06E-124 | 13 |
| RNF130.3    | 5.77E-129 | 0.885721809 | 0.686 | 0.154 | 1.32E-124 | 13 |
| FTL.11      | 2.18E-128 | 1.327766701 | 1     | 0.936 | 5.01E-124 | 13 |
| PSAP.11     | 2.37E-128 | 1.450346925 | 0.984 | 0.456 | 5.45E-124 | 13 |
| FAM110A     | 3.70E-127 | 0.800942771 | 0.32  | 0.038 | 8.49E-123 | 13 |
| H3F3A.7     | 5.47E-127 | 1.304181676 | 0.997 | 0.733 | 1.26E-122 | 13 |
| PRAM1.1     | 1.17E-126 | 0.583696126 | 0.294 | 0.033 | 2.69E-122 | 13 |
| LTA4H.2     | 1.47E-126 | 1.019694767 | 0.638 | 0.147 | 3.37E-122 | 13 |
| CST3.12     | 5.94E-126 | 1.296065825 | 0.99  | 0.372 | 1.36E-121 | 13 |
| MS4A4A.2    | 8.13E-126 | 0.76528191  | 0.476 | 0.081 | 1.87E-121 | 13 |

|             |           |             |       |       |           |    |
|-------------|-----------|-------------|-------|-------|-----------|----|
| PTPRE.1     | 3.17E-125 | 0.978429125 | 0.657 | 0.15  | 7.29E-121 | 13 |
| HBEGF.2     | 1.28E-124 | 0.969168955 | 0.359 | 0.049 | 2.95E-120 | 13 |
| UPP1        | 1.86E-124 | 1.03718492  | 0.654 | 0.153 | 4.28E-120 | 13 |
| GLUL.10     | 2.78E-124 | 1.412151354 | 0.893 | 0.293 | 6.40E-120 | 13 |
| PGD.2       | 4.73E-124 | 0.75897795  | 0.427 | 0.069 | 1.09E-119 | 13 |
| IGSF6.2     | 1.12E-123 | 0.883536086 | 0.495 | 0.089 | 2.58E-119 | 13 |
| AGTRAP      | 7.53E-123 | 0.867210509 | 0.55  | 0.111 | 1.73E-118 | 13 |
| TIMP1.11    | 8.96E-123 | 1.507361624 | 0.893 | 0.301 | 2.06E-118 | 13 |
| NFKBIZ      | 1.01E-121 | 1.282473175 | 0.751 | 0.204 | 2.33E-117 | 13 |
| CD83.1      | 1.05E-120 | 0.830537118 | 0.424 | 0.067 | 2.42E-116 | 13 |
| MT-CO1.6    | 5.31E-120 | 0.927222198 | 0.997 | 0.924 | 1.22E-115 | 13 |
| RIPK2.1     | 2.04E-118 | 0.675772215 | 0.453 | 0.078 | 4.70E-114 | 13 |
| RILPL2.1    | 2.69E-117 | 1.000440195 | 0.722 | 0.191 | 6.19E-113 | 13 |
| NUP214.2    | 7.99E-117 | 0.893563856 | 0.518 | 0.105 | 1.84E-112 | 13 |
| KCTD12.2    | 2.86E-116 | 0.86997519  | 0.599 | 0.125 | 6.58E-112 | 13 |
| SNX10.2     | 9.13E-115 | 0.884250581 | 0.722 | 0.186 | 2.10E-110 | 13 |
| GRINA.2     | 1.14E-114 | 1.005587162 | 0.615 | 0.15  | 2.61E-110 | 13 |
| CSF3R.2     | 1.20E-114 | 0.800445851 | 0.466 | 0.085 | 2.75E-110 | 13 |
| FAM45A      | 3.63E-114 | 0.765291122 | 0.495 | 0.094 | 8.34E-110 | 13 |
| ITGAX.2     | 3.47E-113 | 0.696296637 | 0.375 | 0.058 | 7.97E-109 | 13 |
| ACSL1.2     | 1.21E-111 | 0.933589181 | 0.515 | 0.107 | 2.78E-107 | 13 |
| WARS.1      | 2.17E-111 | 0.887278615 | 0.447 | 0.082 | 4.99E-107 | 13 |
| S100A6.6    | 2.72E-111 | 1.322641831 | 0.994 | 0.761 | 6.24E-107 | 13 |
| CSGALNACT2  | 3.67E-111 | 0.801148343 | 0.472 | 0.09  | 8.44E-107 | 13 |
| CMTM6.2     | 1.09E-110 | 1.002761924 | 0.744 | 0.214 | 2.51E-106 | 13 |
| NEAT1.8     | 1.55E-110 | 1.285435397 | 0.99  | 0.748 | 3.56E-106 | 13 |
| OAZ1.8      | 1.23E-109 | 1.138386749 | 1     | 0.73  | 2.83E-105 | 13 |
| ZNF281      | 4.11E-109 | 0.803719769 | 0.466 | 0.088 | 9.44E-105 | 13 |
| TLR2.2      | 1.08E-107 | 0.834956753 | 0.485 | 0.097 | 2.49E-103 | 13 |
| NLRP3.2     | 4.13E-107 | 0.814251945 | 0.398 | 0.068 | 9.49E-103 | 13 |
| FGD2.2      | 1.16E-106 | 0.669654453 | 0.356 | 0.056 | 2.67E-102 | 13 |
| MAPKAPK3    | 3.49E-105 | 0.717605891 | 0.424 | 0.077 | 8.02E-101 | 13 |
| CPVL.2      | 6.03E-105 | 0.846851582 | 0.54  | 0.116 | 1.39E-100 | 13 |
| CD300A.2    | 8.54E-105 | 0.791939532 | 0.485 | 0.1   | 1.96E-100 | 13 |
| ATP6V1B2.2  | 1.01E-104 | 0.829365172 | 0.566 | 0.132 | 2.33E-100 | 13 |
| SERPINB1.4  | 3.96E-104 | 1.109217565 | 0.796 | 0.257 | 9.10E-100 | 13 |
| S100A4.11   | 1.57E-103 | 1.40869101  | 0.997 | 0.693 | 3.62E-99  | 13 |
| ATG3.2      | 2.31E-103 | 0.791898922 | 0.615 | 0.156 | 5.31E-99  | 13 |
| RNF149.9    | 5.77E-103 | 1.053924844 | 0.79  | 0.258 | 1.33E-98  | 13 |
| RNASE6.2    | 1.00E-102 | 1.10745798  | 0.586 | 0.139 | 2.30E-98  | 13 |
| SMAP2.9     | 1.54E-102 | 1.175264266 | 0.828 | 0.286 | 3.53E-98  | 13 |
| TRIB1.1     | 2.56E-102 | 0.615495603 | 0.32  | 0.046 | 5.88E-98  | 13 |
| PRELID1.4   | 3.10E-102 | 1.005261208 | 0.883 | 0.344 | 7.13E-98  | 13 |
| TNFAIP2.2   | 4.60E-102 | 0.736383522 | 0.356 | 0.058 | 1.06E-97  | 13 |
| RASGEF1B.1  | 8.91E-102 | 0.656604732 | 0.44  | 0.081 | 2.05E-97  | 13 |
| NPC2.10     | 9.22E-102 | 1.033900201 | 0.942 | 0.366 | 2.12E-97  | 13 |
| MEGF9       | 9.83E-102 | 0.617390258 | 0.333 | 0.051 | 2.26E-97  | 13 |
| CASP1.2     | 5.95E-100 | 0.996752565 | 0.673 | 0.193 | 1.37E-95  | 13 |
| HLA-DRB5.11 | 6.48E-100 | 0.926370114 | 0.935 | 0.361 | 1.49E-95  | 13 |
| THEMIS2.2   | 2.93E-98  | 0.689915856 | 0.502 | 0.11  | 6.74E-94  | 13 |
| IL1R2       | 2.31E-97  | 1.00934704  | 0.272 | 0.035 | 5.30E-93  | 13 |
| LILRB1.2    | 8.09E-97  | 0.749948291 | 0.34  | 0.056 | 1.86E-92  | 13 |
| PTEN.2      | 1.35E-96  | 0.7788255   | 0.573 | 0.141 | 3.09E-92  | 13 |
| CALM2.3     | 1.88E-96  | 1.305497424 | 0.971 | 0.623 | 4.33E-92  | 13 |
| DDX21.2     | 5.31E-96  | 0.892851018 | 0.751 | 0.231 | 1.22E-91  | 13 |
| CARD16.7    | 8.23E-96  | 1.007167746 | 0.841 | 0.305 | 1.89E-91  | 13 |
| CD14.3      | 1.34E-94  | 1.310225019 | 0.547 | 0.133 | 3.08E-90  | 13 |
| EVI2B.7     | 2.37E-94  | 1.081263073 | 0.871 | 0.323 | 5.44E-90  | 13 |



|            |          |             |       |       |          |    |
|------------|----------|-------------|-------|-------|----------|----|
| TLR4.1     | 1.55E-93 | 0.549635167 | 0.265 | 0.036 | 3.57E-89 | 13 |
| CD86.2     | 2.79E-93 | 0.745213493 | 0.43  | 0.088 | 6.41E-89 | 13 |
| HLA-DQA2.3 | 3.11E-93 | 0.634835067 | 0.638 | 0.157 | 7.16E-89 | 13 |
| P2RY13.2   | 3.44E-93 | 0.64108293  | 0.33  | 0.054 | 7.91E-89 | 13 |
| PLBD1.2    | 1.49E-92 | 0.868061831 | 0.421 | 0.087 | 3.43E-88 | 13 |
| S100A11.11 | 4.72E-92 | 1.072797902 | 0.984 | 0.582 | 1.09E-87 | 13 |
| SLC43A2.2  | 1.25E-91 | 0.709613076 | 0.401 | 0.078 | 2.88E-87 | 13 |
| SAMSN1.7   | 1.80E-91 | 1.296475652 | 0.832 | 0.311 | 4.15E-87 | 13 |
| THBD       | 1.94E-91 | 0.741287629 | 0.262 | 0.035 | 4.46E-87 | 13 |
| TBXAS1.2   | 2.82E-91 | 0.74884505  | 0.511 | 0.118 | 6.48E-87 | 13 |
| UBE2R2.2   | 5.44E-91 | 0.737799964 | 0.479 | 0.109 | 1.25E-86 | 13 |
| CTSH.2     | 7.68E-91 | 0.769364375 | 0.631 | 0.166 | 1.76E-86 | 13 |
| FAM65B.2   | 2.36E-89 | 0.811567428 | 0.576 | 0.142 | 5.43E-85 | 13 |
| H2AFY.6    | 2.67E-89 | 0.935661286 | 0.796 | 0.272 | 6.13E-85 | 13 |
| UBE2D1.1   | 3.19E-89 | 0.636360913 | 0.466 | 0.104 | 7.33E-85 | 13 |
| SOD2.10    | 3.28E-89 | 0.739709226 | 0.809 | 0.282 | 7.53E-85 | 13 |
| JAML.2     | 4.91E-89 | 0.761222165 | 0.654 | 0.182 | 1.13E-84 | 13 |
| SRGN.9     | 9.68E-89 | 1.249815769 | 0.997 | 0.786 | 2.22E-84 | 13 |
| BLVRB.1    | 1.04E-88 | 0.607807667 | 0.576 | 0.151 | 2.40E-84 | 13 |
| BCAT1.2    | 5.85E-88 | 0.624431397 | 0.32  | 0.054 | 1.34E-83 | 13 |
| BID.1      | 9.24E-88 | 0.758047526 | 0.476 | 0.11  | 2.12E-83 | 13 |
| MT-CO2.7   | 9.83E-87 | 0.798905631 | 0.997 | 0.872 | 2.26E-82 | 13 |
| SMCO4.2    | 5.25E-86 | 0.650793911 | 0.379 | 0.075 | 1.21E-81 | 13 |
| TNFRSF1B.3 | 4.23E-85 | 0.822493809 | 0.706 | 0.222 | 9.72E-81 | 13 |
| CXCL16.2   | 7.86E-85 | 0.681976183 | 0.54  | 0.131 | 1.81E-80 | 13 |
| SERP1.4    | 1.34E-84 | 1.040389106 | 0.903 | 0.426 | 3.09E-80 | 13 |
| ARRB2.2    | 1.53E-84 | 0.776816898 | 0.644 | 0.187 | 3.51E-80 | 13 |
| RNF13.2    | 1.84E-84 | 0.798320984 | 0.66  | 0.197 | 4.23E-80 | 13 |
| CXCL8.2    | 2.24E-84 | 0.932155831 | 0.401 | 0.083 | 5.15E-80 | 13 |
| SCPEP1.2   | 4.26E-84 | 0.726365928 | 0.515 | 0.128 | 9.78E-80 | 13 |
| RHOG.6     | 1.38E-83 | 0.887018827 | 0.741 | 0.253 | 3.16E-79 | 13 |
| MS4A6A.4   | 3.09E-83 | 0.580208762 | 0.68  | 0.183 | 7.11E-79 | 13 |
| CHPT1.2    | 7.25E-83 | 0.820916371 | 0.511 | 0.131 | 1.67E-78 | 13 |
| CXorf21.2  | 2.50E-82 | 0.565560015 | 0.275 | 0.043 | 5.74E-78 | 13 |
| PTPN6.1    | 4.80E-82 | 0.837820468 | 0.576 | 0.161 | 1.10E-77 | 13 |
| TALDO1.4   | 3.27E-81 | 0.704978728 | 0.751 | 0.252 | 7.51E-77 | 13 |
| GAPT.2     | 1.89E-80 | 0.721441967 | 0.353 | 0.069 | 4.35E-76 | 13 |
| SIGLEC10.2 | 7.63E-80 | 0.748416767 | 0.35  | 0.069 | 1.75E-75 | 13 |
| SELL.1     | 8.49E-80 | 0.652219141 | 0.408 | 0.086 | 1.95E-75 | 13 |
| TMEM167A   | 1.35E-79 | 0.830421812 | 0.579 | 0.17  | 3.11E-75 | 13 |
| VAPA.4     | 1.37E-79 | 0.907151706 | 0.861 | 0.353 | 3.16E-75 | 13 |
| PRKCB      | 1.85E-78 | 0.622969552 | 0.424 | 0.092 | 4.25E-74 | 13 |
| AKIRIN2.2  | 4.11E-78 | 0.766016391 | 0.615 | 0.181 | 9.46E-74 | 13 |
| HLA-DRA.13 | 3.58E-77 | 0.672758118 | 0.987 | 0.666 | 8.23E-73 | 13 |
| AZI2.2     | 4.52E-77 | 0.684625463 | 0.489 | 0.123 | 1.04E-72 | 13 |
| ARPC3.6    | 9.25E-77 | 0.936787523 | 0.968 | 0.596 | 2.13E-72 | 13 |
| RHOB.11    | 1.07E-76 | 0.95629596  | 0.854 | 0.337 | 2.46E-72 | 13 |
| VNN2       | 8.55E-76 | 0.562944401 | 0.262 | 0.041 | 1.96E-71 | 13 |
| VMP1.7     | 4.38E-75 | 0.843487879 | 0.799 | 0.309 | 1.01E-70 | 13 |
| PKP2.1     | 5.41E-75 | 0.636167585 | 0.278 | 0.048 | 1.24E-70 | 13 |
| SNX2.2     | 6.55E-75 | 0.585063066 | 0.57  | 0.165 | 1.51E-70 | 13 |
| IER3.2     | 1.17E-74 | 0.858153592 | 0.424 | 0.102 | 2.70E-70 | 13 |
| PELI1.1    | 1.55E-74 | 0.678895665 | 0.44  | 0.106 | 3.55E-70 | 13 |
| EMP3.6     | 2.38E-74 | 0.984593264 | 0.854 | 0.379 | 5.47E-70 | 13 |
| SLC25A37.2 | 2.49E-74 | 0.764644811 | 0.524 | 0.146 | 5.71E-70 | 13 |
| IFNGR2.2   | 2.56E-74 | 0.662507193 | 0.453 | 0.115 | 5.88E-70 | 13 |
| TSPO.7     | 5.11E-73 | 0.929782939 | 0.893 | 0.41  | 1.17E-68 | 13 |
| CD48.11    | 9.06E-73 | 0.967690378 | 0.851 | 0.364 | 2.08E-68 | 13 |

|            |          |             |       |       |          |    |
|------------|----------|-------------|-------|-------|----------|----|
| GRN.12     | 1.19E-72 | 0.576840128 | 0.751 | 0.243 | 2.73E-68 | 13 |
| GDI2.10    | 1.22E-72 | 0.729361545 | 0.783 | 0.302 | 2.81E-68 | 13 |
| LGALS3.5   | 2.64E-72 | 0.596572052 | 0.709 | 0.235 | 6.07E-68 | 13 |
| BTK.2      | 3.88E-72 | 0.534940958 | 0.314 | 0.061 | 8.93E-68 | 13 |
| DAPK1.2    | 4.03E-72 | 0.592576517 | 0.314 | 0.061 | 9.27E-68 | 13 |
| APLP2.11   | 8.59E-72 | 0.672832154 | 0.718 | 0.245 | 1.98E-67 | 13 |
| VAMP5.6    | 1.24E-71 | 0.829506745 | 0.757 | 0.297 | 2.84E-67 | 13 |
| ALOX5.2    | 1.94E-71 | 0.567597375 | 0.401 | 0.094 | 4.47E-67 | 13 |
| NINJ1      | 3.32E-71 | 0.565028435 | 0.45  | 0.112 | 7.63E-67 | 13 |
| TES        | 8.96E-71 | 0.763056787 | 0.531 | 0.151 | 2.06E-66 | 13 |
| SKAP2.2    | 5.01E-70 | 0.619463226 | 0.566 | 0.169 | 1.15E-65 | 13 |
| PGLS.2     | 7.51E-70 | 0.673811551 | 0.676 | 0.229 | 1.73E-65 | 13 |
| CECR1.2    | 9.77E-70 | 0.683694522 | 0.427 | 0.106 | 2.25E-65 | 13 |
| CUX1.1     | 1.82E-69 | 0.66697471  | 0.395 | 0.094 | 4.19E-65 | 13 |
| ANXA5.8    | 3.03E-69 | 0.722892336 | 0.828 | 0.341 | 6.96E-65 | 13 |
| FOS.11     | 7.01E-69 | 1.06865849  | 1     | 0.674 | 1.61E-64 | 13 |
| RPS9.5     | 1.41E-68 | 0.670133165 | 0.99  | 0.876 | 3.25E-64 | 13 |
| CYBA.8     | 1.89E-68 | 0.90330598  | 0.99  | 0.68  | 4.34E-64 | 13 |
| IRF8.2     | 2.21E-68 | 0.563871675 | 0.35  | 0.076 | 5.08E-64 | 13 |
| HSD17B11.6 | 3.15E-68 | 0.67763407  | 0.696 | 0.242 | 7.24E-64 | 13 |
| C3AR1.2    | 4.66E-68 | 0.601314015 | 0.434 | 0.108 | 1.07E-63 | 13 |
| LACTB.2    | 3.04E-67 | 0.536456868 | 0.379 | 0.089 | 6.99E-63 | 13 |
| NBPF14.1   | 3.10E-67 | 0.614540095 | 0.311 | 0.063 | 7.12E-63 | 13 |
| GSTP1.7    | 7.97E-67 | 0.769794592 | 0.945 | 0.479 | 1.83E-62 | 13 |
| GPX1.11    | 1.45E-66 | 0.778344977 | 0.916 | 0.418 | 3.32E-62 | 13 |
| MAP3K8.2   | 1.85E-66 | 0.880120186 | 0.502 | 0.143 | 4.24E-62 | 13 |
| SLC36A4    | 3.37E-66 | 0.538739286 | 0.275 | 0.05  | 7.75E-62 | 13 |
| AREG.2     | 4.26E-66 | 1.432352226 | 0.602 | 0.2   | 9.80E-62 | 13 |
| DRAM2.2    | 5.10E-66 | 0.601277487 | 0.55  | 0.165 | 1.17E-61 | 13 |
| ARPC5.6    | 8.79E-66 | 0.797605507 | 0.89  | 0.425 | 2.02E-61 | 13 |
| MGAT1.3    | 5.83E-65 | 0.628199179 | 0.592 | 0.192 | 1.34E-60 | 13 |
| ATP6V0D1.2 | 9.36E-65 | 0.597573573 | 0.55  | 0.168 | 2.15E-60 | 13 |
| IFNGR1.10  | 2.78E-64 | 0.552951377 | 0.731 | 0.248 | 6.39E-60 | 13 |
| VPS35.2    | 6.99E-64 | 0.570155248 | 0.56  | 0.174 | 1.61E-59 | 13 |
| SPG21.2    | 9.59E-64 | 0.636941456 | 0.524 | 0.158 | 2.20E-59 | 13 |
| PLEK.3     | 2.45E-63 | 0.639744795 | 0.505 | 0.144 | 5.62E-59 | 13 |
| KLF2.3     | 2.49E-63 | 0.784019788 | 0.612 | 0.2   | 5.71E-59 | 13 |
| FCGR3A.5   | 1.09E-62 | 1.344232776 | 0.615 | 0.225 | 2.50E-58 | 13 |
| PABPC1.7   | 1.23E-62 | 0.854389027 | 0.981 | 0.655 | 2.83E-58 | 13 |
| VASP.1     | 7.84E-62 | 0.655319354 | 0.628 | 0.217 | 1.80E-57 | 13 |
| GNAQ.3     | 2.86E-61 | 0.629090379 | 0.456 | 0.129 | 6.57E-57 | 13 |
| MBD2       | 1.12E-60 | 0.517438221 | 0.33  | 0.074 | 2.56E-56 | 13 |
| HSBP1.4    | 1.43E-60 | 0.509055916 | 0.647 | 0.23  | 3.28E-56 | 13 |
| FBP1.2     | 1.50E-60 | 0.528977673 | 0.34  | 0.079 | 3.44E-56 | 13 |
| SAP30.2    | 1.52E-60 | 0.653160019 | 0.398 | 0.105 | 3.49E-56 | 13 |
| GNAI2.8    | 1.72E-60 | 0.695211662 | 0.689 | 0.25  | 3.96E-56 | 13 |
| RAB10.1    | 4.54E-60 | 0.535167475 | 0.537 | 0.169 | 1.04E-55 | 13 |
| STK17B.9   | 9.91E-60 | 0.759237679 | 0.877 | 0.39  | 2.28E-55 | 13 |
| TCIRG1     | 4.23E-59 | 0.531445097 | 0.447 | 0.124 | 9.71E-55 | 13 |
| MT-CO3.7   | 4.32E-59 | 0.644909755 | 0.994 | 0.877 | 9.92E-55 | 13 |
| ATP6V0B.7  | 4.74E-59 | 0.697009269 | 0.735 | 0.286 | 1.09E-54 | 13 |
| LY86.2     | 1.38E-58 | 0.576240704 | 0.411 | 0.107 | 3.16E-54 | 13 |
| CCDC88A.2  | 1.77E-58 | 0.683270969 | 0.379 | 0.099 | 4.06E-54 | 13 |
| SNX3.9     | 1.92E-58 | 0.517171062 | 0.858 | 0.373 | 4.41E-54 | 13 |
| GLIPR1.9   | 6.26E-58 | 0.685382163 | 0.748 | 0.289 | 1.44E-53 | 13 |
| HMOX1.2    | 1.05E-57 | 0.509856034 | 0.401 | 0.108 | 2.41E-53 | 13 |
| NUMB.2     | 1.42E-57 | 0.567512886 | 0.44  | 0.127 | 3.27E-53 | 13 |
| WDR26      | 1.69E-57 | 0.529444724 | 0.356 | 0.087 | 3.87E-53 | 13 |

|            |          |             |       |       |          |    |
|------------|----------|-------------|-------|-------|----------|----|
| RTN4.10    | 2.14E-57 | 0.558313994 | 0.816 | 0.34  | 4.93E-53 | 13 |
| MFSD1.2    | 2.44E-57 | 0.552125489 | 0.476 | 0.139 | 5.60E-53 | 13 |
| ARPC1B.5   | 2.45E-57 | 0.772306065 | 0.932 | 0.515 | 5.62E-53 | 13 |
| METTL7A.2  | 3.95E-57 | 0.54511678  | 0.395 | 0.108 | 9.09E-53 | 13 |
| ZNF706.3   | 7.55E-57 | 0.64666873  | 0.686 | 0.267 | 1.74E-52 | 13 |
| SNX18      | 1.27E-56 | 0.51661429  | 0.288 | 0.061 | 2.92E-52 | 13 |
| BACH1.1    | 1.87E-56 | 0.570050509 | 0.343 | 0.085 | 4.29E-52 | 13 |
| SDCBP.10   | 2.27E-56 | 0.646006338 | 0.832 | 0.362 | 5.22E-52 | 13 |
| SRGAP2B.2  | 2.70E-56 | 0.502370303 | 0.408 | 0.111 | 6.21E-52 | 13 |
| CNPY3.2    | 8.50E-56 | 0.57802626  | 0.608 | 0.209 | 1.95E-51 | 13 |
| ATP1B3.10  | 9.67E-56 | 0.764540702 | 0.663 | 0.26  | 2.22E-51 | 13 |
| DICER1.2   | 4.29E-55 | 0.631373742 | 0.392 | 0.108 | 9.85E-51 | 13 |
| CAPNS1.1   | 1.06E-54 | 0.549939083 | 0.492 | 0.156 | 2.44E-50 | 13 |
| ACTB.8     | 1.24E-54 | 0.674987579 | 1     | 0.927 | 2.86E-50 | 13 |
| CTSB.11    | 1.27E-54 | 0.548921707 | 0.767 | 0.292 | 2.91E-50 | 13 |
| CHP1       | 2.03E-54 | 0.521056622 | 0.375 | 0.1   | 4.66E-50 | 13 |
| LIMS1.9    | 2.06E-54 | 0.609019249 | 0.654 | 0.24  | 4.73E-50 | 13 |
| HN1.3      | 3.46E-54 | 0.747196533 | 0.621 | 0.231 | 7.96E-50 | 13 |
| FKBP5.8    | 4.12E-54 | 0.691428759 | 0.864 | 0.385 | 9.46E-50 | 13 |
| SELPLG.1   | 4.52E-54 | 0.537283947 | 0.482 | 0.145 | 1.04E-49 | 13 |
| MPHOSPH6   | 6.49E-54 | 0.54693784  | 0.298 | 0.068 | 1.49E-49 | 13 |
| PAG1.1     | 6.72E-54 | 0.785494413 | 0.544 | 0.189 | 1.54E-49 | 13 |
| C7orf73.2  | 7.81E-54 | 0.504515639 | 0.644 | 0.238 | 1.80E-49 | 13 |
| ACTR2.6    | 1.18E-53 | 0.645373409 | 0.819 | 0.357 | 2.72E-49 | 13 |
| PABPC4.2   | 3.17E-53 | 0.602980987 | 0.563 | 0.193 | 7.29E-49 | 13 |
| ZBTB16.2   | 2.00E-52 | 0.595018653 | 0.592 | 0.212 | 4.60E-48 | 13 |
| HACD4.2    | 2.35E-52 | 0.530706054 | 0.401 | 0.113 | 5.39E-48 | 13 |
| RHOA.8     | 4.38E-52 | 0.668914913 | 0.922 | 0.499 | 1.01E-47 | 13 |
| SLC25A6.5  | 4.52E-52 | 0.713367626 | 0.971 | 0.648 | 1.04E-47 | 13 |
| XRN2       | 9.13E-52 | 0.506740417 | 0.605 | 0.219 | 2.10E-47 | 13 |
| DUSP1.8    | 1.57E-51 | 0.763209302 | 0.997 | 0.789 | 3.61E-47 | 13 |
| C4orf48.2  | 2.60E-51 | 0.528396167 | 0.553 | 0.19  | 5.97E-47 | 13 |
| C14orf2.3  | 5.05E-51 | 0.644350558 | 0.929 | 0.506 | 1.16E-46 | 13 |
| RGS19.2    | 6.06E-51 | 0.522969788 | 0.453 | 0.141 | 1.39E-46 | 13 |
| KIAA1033.3 | 7.55E-51 | 0.502525364 | 0.421 | 0.126 | 1.74E-46 | 13 |
| IFITM2.9   | 7.60E-51 | 0.782199837 | 0.858 | 0.467 | 1.75E-46 | 13 |
| SH3BGRL.7  | 1.14E-50 | 0.652044386 | 0.838 | 0.38  | 2.63E-46 | 13 |
| PCBP1.2    | 1.75E-50 | 0.684232226 | 0.841 | 0.41  | 4.01E-46 | 13 |
| FGD4.2     | 2.86E-50 | 0.553374477 | 0.314 | 0.08  | 6.58E-46 | 13 |
| ARPC2.7    | 3.58E-50 | 0.716470712 | 0.974 | 0.63  | 8.23E-46 | 13 |
| PLAC8.1    | 4.12E-50 | 0.558675728 | 0.44  | 0.129 | 9.46E-46 | 13 |
| GSTO1.6    | 4.13E-50 | 0.543679786 | 0.735 | 0.314 | 9.50E-46 | 13 |
| ZCCHC6.1   | 4.60E-50 | 0.559685576 | 0.398 | 0.116 | 1.06E-45 | 13 |
| SH3BGRL3.9 | 5.63E-50 | 0.744173076 | 0.977 | 0.675 | 1.29E-45 | 13 |
| GMFG.6     | 7.86E-50 | 0.710532821 | 0.935 | 0.547 | 1.81E-45 | 13 |
| FNIP2.2    | 1.68E-49 | 0.503197812 | 0.294 | 0.072 | 3.85E-45 | 13 |
| LGALS1.5   | 5.53E-49 | 0.59352794  | 0.951 | 0.564 | 1.27E-44 | 13 |
| GNG5.7     | 6.52E-49 | 0.518190489 | 0.777 | 0.342 | 1.50E-44 | 13 |
| RAP1A.6    | 1.29E-48 | 0.588044192 | 0.767 | 0.341 | 2.96E-44 | 13 |
| OAS1.1     | 1.34E-48 | 0.506340534 | 0.282 | 0.067 | 3.07E-44 | 13 |
| WAC-AS1    | 1.38E-48 | 0.524343764 | 0.362 | 0.101 | 3.17E-44 | 13 |
| AHR.1      | 2.68E-48 | 0.553920823 | 0.307 | 0.077 | 6.15E-44 | 13 |
| SOCS3.2    | 4.81E-48 | 0.544329898 | 0.476 | 0.154 | 1.11E-43 | 13 |
| LAMTOR4.2  | 4.98E-48 | 0.557284558 | 0.864 | 0.408 | 1.14E-43 | 13 |
| LRRFIP1.4  | 5.66E-48 | 0.690378646 | 0.822 | 0.403 | 1.30E-43 | 13 |
| HCLS1.7    | 5.68E-48 | 0.569562194 | 0.761 | 0.312 | 1.31E-43 | 13 |
| YBX1.6     | 1.70E-47 | 0.661228684 | 0.955 | 0.664 | 3.91E-43 | 13 |
| AP2S1.10   | 2.25E-47 | 0.521668989 | 0.718 | 0.301 | 5.16E-43 | 13 |

|           |          |              |       |       |          |    |
|-----------|----------|--------------|-------|-------|----------|----|
| NR4A1.3   | 2.93E-47 | 0.516694542  | 0.382 | 0.109 | 6.73E-43 | 13 |
| ANXA2.7   | 1.00E-46 | 0.533036962  | 0.796 | 0.384 | 2.30E-42 | 13 |
| PFDN5.4   | 2.48E-46 | 0.553191102  | 0.994 | 0.779 | 5.71E-42 | 13 |
| EIF1.3    | 3.53E-46 | 0.544173242  | 0.997 | 0.894 | 8.11E-42 | 13 |
| MYO1G.4   | 4.06E-46 | 0.516518804  | 0.489 | 0.161 | 9.33E-42 | 13 |
| BASP1.2   | 1.69E-45 | 0.520428186  | 0.272 | 0.066 | 3.87E-41 | 13 |
| NAP1L1.4  | 2.19E-45 | 0.936748515  | 0.9   | 0.557 | 5.02E-41 | 13 |
| MCL1.7    | 7.72E-45 | 0.681391553  | 0.906 | 0.506 | 1.77E-40 | 13 |
| GIMAP2    | 1.01E-44 | 0.548460232  | 0.479 | 0.164 | 2.32E-40 | 13 |
| ABRACL5   | 1.03E-44 | 0.508044033  | 0.68  | 0.277 | 2.36E-40 | 13 |
| ABI3.4    | 2.08E-44 | 0.584541739  | 0.479 | 0.169 | 4.78E-40 | 13 |
| BLOC1S1.5 | 6.44E-44 | 0.558128698  | 0.744 | 0.337 | 1.48E-39 | 13 |
| SLC8A1.2  | 7.60E-44 | 0.517039845  | 0.301 | 0.08  | 1.75E-39 | 13 |
| MT-ND4.7  | 2.13E-43 | 0.532427167  | 0.997 | 0.871 | 4.90E-39 | 13 |
| IL32.12   | 2.15E-42 | -2.735836882 | 0.291 | 0.584 | 4.94E-38 | 13 |
| RGS1.13   | 2.74E-42 | -2.573400048 | 0.566 | 0.7   | 6.30E-38 | 13 |
| HLA-A.9   | 4.56E-42 | -0.94289362  | 0.987 | 0.892 | 1.05E-37 | 13 |
| MT-ATP6.7 | 1.11E-41 | 0.530622283  | 0.997 | 0.856 | 2.56E-37 | 13 |
| CHMP1B.3  | 2.12E-41 | 0.547101143  | 0.599 | 0.239 | 4.88E-37 | 13 |
| SLC25A5.5 | 1.52E-40 | 0.574574294  | 0.786 | 0.377 | 3.50E-36 | 13 |
| CD37.9    | 2.13E-40 | 0.607381642  | 0.864 | 0.454 | 4.89E-36 | 13 |
| NACA.5    | 1.31E-38 | 0.517807738  | 0.99  | 0.799 | 3.01E-34 | 13 |
| VAMP8.7   | 2.26E-38 | 0.560193333  | 0.845 | 0.452 | 5.19E-34 | 13 |
| EV12A.9   | 2.86E-37 | 0.556580073  | 0.628 | 0.272 | 6.58E-33 | 13 |
| CD3D.13   | 5.55E-37 | -2.312343266 | 0.155 | 0.482 | 1.27E-32 | 13 |
| ITGB2.10  | 3.28E-36 | 0.566848689  | 0.835 | 0.405 | 7.54E-32 | 13 |
| CTSC.10   | 4.34E-36 | 0.599783858  | 0.699 | 0.339 | 9.97E-32 | 13 |
| RPL31.9   | 8.22E-36 | -0.72846868  | 0.994 | 0.905 | 1.89E-31 | 13 |
| SLC35E3.2 | 1.32E-35 | 0.512713159  | 0.333 | 0.108 | 3.03E-31 | 13 |
| CD52.10   | 5.09E-35 | 0.671306784  | 0.919 | 0.54  | 1.17E-30 | 13 |
| LAPTM5.10 | 7.08E-35 | 0.545551444  | 0.958 | 0.558 | 1.63E-30 | 13 |
| LCP1.10   | 9.08E-35 | 0.503531007  | 0.799 | 0.395 | 2.09E-30 | 13 |
| CCNI.2    | 2.29E-34 | 0.531105419  | 0.939 | 0.585 | 5.26E-30 | 13 |
| CD2.12    | 3.41E-34 | -2.268132778 | 0.155 | 0.464 | 7.83E-30 | 13 |
| FYB.11    | 1.59E-33 | 0.511088332  | 0.883 | 0.45  | 3.65E-29 | 13 |
| CYTIP.11  | 2.32E-33 | 0.519592657  | 0.861 | 0.467 | 5.34E-29 | 13 |
| MT-ND1.7  | 4.09E-33 | 0.525464572  | 0.974 | 0.783 | 9.41E-29 | 13 |
| RPL23A.9  | 9.99E-33 | -0.580909993 | 0.994 | 0.929 | 2.30E-28 | 13 |
| CD3E.12   | 3.27E-32 | -1.782435472 | 0.087 | 0.405 | 7.51E-28 | 13 |
| GZMA.12   | 3.48E-31 | -2.41912553  | 0.126 | 0.426 | 7.99E-27 | 13 |
| CCL5.12   | 2.55E-30 | -3.197453265 | 0.375 | 0.566 | 5.86E-26 | 13 |
| TRAC.13   | 5.30E-30 | -2.226375869 | 0.152 | 0.438 | 1.22E-25 | 13 |
| CST7.11   | 9.84E-28 | -2.101290552 | 0.113 | 0.395 | 2.26E-23 | 13 |
| TRBC2.12  | 1.61E-26 | -1.94702921  | 0.11  | 0.383 | 3.70E-22 | 13 |
| RPS29.9   | 2.68E-26 | -0.63618606  | 1     | 0.919 | 6.16E-22 | 13 |
| RPS3.8    | 2.72E-25 | -0.519709598 | 0.994 | 0.917 | 6.25E-21 | 13 |
| SYNE2.12  | 5.52E-25 | -1.458518811 | 0.068 | 0.338 | 1.27E-20 | 13 |
| RPL3.7    | 1.72E-24 | -0.542757953 | 0.997 | 0.931 | 3.94E-20 | 13 |
| CD69.12   | 1.75E-24 | -2.359015956 | 0.35  | 0.533 | 4.03E-20 | 13 |
| CD3G.12   | 3.34E-24 | -1.534840177 | 0.039 | 0.299 | 7.68E-20 | 13 |
| ETS1.11   | 7.52E-23 | -1.407614484 | 0.094 | 0.344 | 1.73E-18 | 13 |
| IGHA1     | 5.64E-22 | -1.738481026 | 0.288 | 0.101 | 1.30E-17 | 13 |
| LCK.13    | 1.49E-21 | -1.254154742 | 0.052 | 0.293 | 3.42E-17 | 13 |
| ITM2A.12  | 4.21E-21 | -1.634480269 | 0.081 | 0.316 | 9.67E-17 | 13 |
| TRBC1.12  | 6.14E-21 | -2.138830332 | 0.129 | 0.358 | 1.41E-16 | 13 |
| MALAT1.12 | 8.39E-21 | -0.585427441 | 1     | 0.982 | 1.93E-16 | 13 |
| CLEC2D.12 | 3.52E-20 | -1.379402628 | 0.081 | 0.311 | 8.10E-16 | 13 |
| HSPA1A.4  | 1.80E-19 | 0.605474968  | 0.45  | 0.229 | 4.14E-15 | 13 |

|             |          |              |       |       |             |    |
|-------------|----------|--------------|-------|-------|-------------|----|
| CD7.10      | 1.64E-18 | -1.555329893 | 0.091 | 0.305 | 3.78E-14    | 13 |
| RPS26.9     | 1.96E-18 | -0.572516706 | 0.984 | 0.868 | 4.51E-14    | 13 |
| ACAP1.13    | 3.22E-18 | -1.283882615 | 0.129 | 0.338 | 7.40E-14    | 13 |
| STK17A.11   | 1.01E-17 | -1.311069635 | 0.168 | 0.371 | 2.31E-13    | 13 |
| GZMK.13     | 1.02E-17 | -2.603932492 | 0.178 | 0.37  | 2.35E-13    | 13 |
| OCIAD2.9    | 4.58E-16 | -1.17146835  | 0.071 | 0.265 | 1.05E-11    | 13 |
| PIK3IP1.12  | 9.54E-16 | -1.227452067 | 0.175 | 0.362 | 2.19E-11    | 13 |
| RPSA.7      | 1.23E-15 | -0.649811695 | 0.916 | 0.801 | 2.82E-11    | 13 |
| CD96.13     | 2.59E-15 | -1.116401996 | 0.068 | 0.253 | 5.95E-11    | 13 |
| CD27.12     | 6.97E-15 | -1.500821126 | 0.091 | 0.271 | 1.60E-10    | 13 |
| RPLP0.8     | 1.42E-14 | -0.762275387 | 0.951 | 0.84  | 3.27E-10    | 13 |
| DUSP2.12    | 1.81E-14 | -1.78378663  | 0.294 | 0.434 | 4.17E-10    | 13 |
| PRDM1.8     | 3.29E-14 | -1.224479429 | 0.113 | 0.296 | 7.57E-10    | 13 |
| CCL4.13     | 1.83E-13 | -2.456586977 | 0.317 | 0.443 | 4.20E-09    | 13 |
| IL7R.11     | 5.09E-13 | -2.050430197 | 0.146 | 0.307 | 1.17E-08    | 13 |
| HMGB1.7     | 3.44E-12 | -0.814369609 | 0.88  | 0.731 | 7.91E-08    | 13 |
| IGKC.9      | 9.19E-10 | -3.07772941  | 0.518 | 0.291 | 2.11E-05    | 13 |
| PRKCH.8     | 1.41E-09 | -0.855080944 | 0.123 | 0.256 | 3.24E-05    | 13 |
| C12orf57.7  | 5.22E-09 | -1.084059511 | 0.272 | 0.374 | 0.000119896 | 13 |
| PIK3R1.10   | 9.32E-09 | -0.983582764 | 0.191 | 0.311 | 0.000214293 | 13 |
| EVL.12      | 1.06E-08 | -1.034957391 | 0.45  | 0.496 | 0.000243198 | 13 |
| GYPC.8      | 1.21E-08 | -0.935457619 | 0.191 | 0.309 | 0.000279024 | 13 |
| SYTL3.11    | 1.46E-08 | -1.048925492 | 0.165 | 0.28  | 0.00033458  | 13 |
| AAK1.12     | 2.10E-08 | -0.891741358 | 0.272 | 0.373 | 0.000483279 | 13 |
| CD99.9      | 2.24E-08 | -0.859065048 | 0.395 | 0.472 | 0.000513777 | 13 |
| C1QA.12     | 3.12E-08 | -0.589402051 | 0.434 | 0.246 | 0.000715958 | 13 |
| ODF2L.7     | 4.05E-08 | -0.958733592 | 0.149 | 0.262 | 0.000930673 | 13 |
| KIAA1551.9  | 5.14E-08 | -0.950445365 | 0.233 | 0.338 | 0.001181076 | 13 |
| RARRES3.10  | 7.52E-08 | -1.020028327 | 0.343 | 0.412 | 0.001727053 | 13 |
| IL2RG.13    | 8.07E-08 | -1.007520428 | 0.298 | 0.374 | 0.001854171 | 13 |
| JUN.8       | 2.59E-07 | -0.954652804 | 0.757 | 0.69  | 0.005945033 | 13 |
| SRSF7.10    | 3.23E-07 | -1.122984237 | 0.579 | 0.544 | 0.007418276 | 13 |
| HBB.7       | 3.33E-07 | -2.45547009  | 0.621 | 0.386 | 0.0076511   | 13 |
| LDHB.8      | 3.47E-07 | -0.920412788 | 0.424 | 0.467 | 0.007963108 | 13 |
| APOBEC3G.10 | 4.93E-07 | -0.948748989 | 0.172 | 0.274 | 0.011318511 | 13 |
| NKG7.13     | 5.45E-07 | -2.280258653 | 0.405 | 0.428 | 0.012535979 | 13 |
| RNF19A.10   | 1.29E-06 | -0.904110666 | 0.184 | 0.279 | 0.029586166 | 13 |
| CMC1.11     | 1.63E-06 | -1.632830813 | 0.197 | 0.287 | 0.037444488 | 13 |
| RGCC.11     | 1.71E-06 | -1.459794974 | 0.223 | 0.309 | 0.039186651 | 13 |
| EMB.9       | 2.16E-06 | -0.729031364 | 0.175 | 0.271 | 0.049639028 | 13 |
| HILPDA.1    | 0        | 2.86343331   | 0.884 | 0.113 | 0           | 14 |
| EGLN3.1     | 0        | 2.143252343  | 0.903 | 0.054 | 0           | 14 |
| BNIP3.2     | 0        | 2.103455248  | 0.911 | 0.119 | 0           | 14 |
| LINC01320   | 0        | 2.053848368  | 0.873 | 0.046 | 0           | 14 |
| CCND1.1     | 0        | 2.044843944  | 0.784 | 0.08  | 0           | 14 |
| RARRES2.2   | 0        | 2.016037805  | 0.931 | 0.096 | 0           | 14 |
| VEGFA       | 0        | 1.967768878  | 0.865 | 0.076 | 0           | 14 |
| ERRFI1      | 0        | 1.902761882  | 0.73  | 0.053 | 0           | 14 |
| ADM.1       | 0        | 1.901728311  | 0.861 | 0.104 | 0           | 14 |
| CA9         | 0        | 1.878994603  | 0.83  | 0.033 | 0           | 14 |
| NUPR1.3     | 0        | 1.847081996  | 0.919 | 0.119 | 0           | 14 |
| NOL3        | 0        | 1.810829749  | 0.861 | 0.061 | 0           | 14 |
| MGST1.2     | 0        | 1.695323495  | 0.915 | 0.097 | 0           | 14 |
| CP          | 0        | 1.675982293  | 0.529 | 0.036 | 0           | 14 |
| PLOD2       | 0        | 1.673394428  | 0.772 | 0.032 | 0           | 14 |
| LOX         | 0        | 1.634367845  | 0.653 | 0.032 | 0           | 14 |
| CA12        | 0        | 1.470927144  | 0.683 | 0.027 | 0           | 14 |
| CMBL.1      | 0        | 1.431566491  | 0.741 | 0.047 | 0           | 14 |

|              |           |             |       |       |           |    |
|--------------|-----------|-------------|-------|-------|-----------|----|
| KRT8.1       | 0         | 1.357908048 | 0.819 | 0.085 | 0         | 14 |
| EDN1         | 0         | 1.307252075 | 0.417 | 0.02  | 0         | 14 |
| TFPI.1       | 0         | 1.292309906 | 0.699 | 0.061 | 0         | 14 |
| IRX3         | 0         | 1.276632413 | 0.571 | 0.021 | 0         | 14 |
| NPTX2        | 0         | 1.247512669 | 0.517 | 0.021 | 0         | 14 |
| TCEA3        | 0         | 1.244912671 | 0.745 | 0.044 | 0         | 14 |
| AK4          | 0         | 1.194856913 | 0.687 | 0.025 | 0         | 14 |
| ADSSL1       | 0         | 1.107216223 | 0.517 | 0.024 | 0         | 14 |
| P3H2         | 0         | 1.073118894 | 0.637 | 0.04  | 0         | 14 |
| MAOB         | 0         | 1.061706281 | 0.622 | 0.026 | 0         | 14 |
| BHMT.1       | 0         | 1.057620525 | 0.625 | 0.03  | 0         | 14 |
| FSTL3        | 0         | 1.057136149 | 0.471 | 0.027 | 0         | 14 |
| EMX2         | 0         | 1.045206103 | 0.544 | 0.023 | 0         | 14 |
| UGT2B7       | 0         | 1.007711538 | 0.571 | 0.032 | 0         | 14 |
| ANG          | 0         | 0.934703068 | 0.56  | 0.038 | 0         | 14 |
| CDK18        | 0         | 0.909010029 | 0.533 | 0.026 | 0         | 14 |
| ENPP3        | 0         | 0.904513111 | 0.514 | 0.017 | 0         | 14 |
| FBXO17       | 0         | 0.90363076  | 0.521 | 0.021 | 0         | 14 |
| RP11-14N7.2  | 0         | 0.878175488 | 0.579 | 0.037 | 0         | 14 |
| BICC1        | 0         | 0.876767547 | 0.448 | 0.017 | 0         | 14 |
| RP1-60O19.1  | 0         | 0.816842725 | 0.533 | 0.023 | 0         | 14 |
| KISS1R       | 0         | 0.815993385 | 0.409 | 0.016 | 0         | 14 |
| ZNF395       | 0         | 0.791902254 | 0.514 | 0.023 | 0         | 14 |
| RP11-11N9.4  | 0         | 0.787058631 | 0.494 | 0.031 | 0         | 14 |
| PCOLCE2      | 0         | 0.778442191 | 0.344 | 0.007 | 0         | 14 |
| FABP6        | 0         | 0.771348422 | 0.544 | 0.033 | 0         | 14 |
| P4HA2        | 0         | 0.770155696 | 0.456 | 0.022 | 0         | 14 |
| CDCA2        | 0         | 0.730704211 | 0.429 | 0.021 | 0         | 14 |
| EDIL3        | 0         | 0.711994    | 0.432 | 0.018 | 0         | 14 |
| MAPT         | 0         | 0.707657452 | 0.351 | 0.006 | 0         | 14 |
| SPINK13      | 0         | 0.696883203 | 0.309 | 0.009 | 0         | 14 |
| GALNT14      | 0         | 0.693681833 | 0.432 | 0.017 | 0         | 14 |
| CDH2         | 0         | 0.6930213   | 0.448 | 0.01  | 0         | 14 |
| STC2         | 0         | 0.691850616 | 0.32  | 0.008 | 0         | 14 |
| BACE2        | 0         | 0.649101251 | 0.386 | 0.018 | 0         | 14 |
| ARSE         | 0         | 0.634255192 | 0.417 | 0.013 | 0         | 14 |
| BHMT2        | 0         | 0.624589678 | 0.432 | 0.019 | 0         | 14 |
| SLC22A2      | 0         | 0.623916444 | 0.398 | 0.018 | 0         | 14 |
| FMO2         | 0         | 0.61321035  | 0.263 | 0.004 | 0         | 14 |
| SPAG4        | 0         | 0.545613606 | 0.413 | 0.021 | 0         | 14 |
| RASSF6       | 0         | 0.545317822 | 0.29  | 0.006 | 0         | 14 |
| RP11-798K3.2 | 0         | 0.532876038 | 0.34  | 0.012 | 0         | 14 |
| CLEC18A      | 0         | 0.514631417 | 0.34  | 0.012 | 0         | 14 |
| SLC2A1       | 6.43E-304 | 0.960122601 | 0.525 | 0.036 | 1.48E-299 | 14 |
| SOX4         | 6.61E-302 | 2.136740356 | 0.784 | 0.09  | 1.52E-297 | 14 |
| ANGPTL4.2    | 1.16E-300 | 2.913743924 | 0.961 | 0.152 | 2.67E-296 | 14 |
| CXCL14.1     | 1.41E-300 | 1.22386362  | 0.637 | 0.054 | 3.24E-296 | 14 |
| CD24.3       | 9.58E-299 | 2.810169848 | 0.992 | 0.162 | 2.20E-294 | 14 |
| SLC3A1       | 1.45E-298 | 0.93801204  | 0.49  | 0.031 | 3.33E-294 | 14 |
| FAM13A       | 1.10E-296 | 1.0766083   | 0.653 | 0.06  | 2.52E-292 | 14 |
| ASS1         | 9.48E-295 | 0.639987746 | 0.386 | 0.019 | 2.18E-290 | 14 |
| PROS1.1      | 1.02E-294 | 0.766193634 | 0.552 | 0.041 | 2.33E-290 | 14 |
| CKB          | 5.24E-294 | 0.960841747 | 0.533 | 0.039 | 1.20E-289 | 14 |
| NR1H4        | 1.41E-290 | 0.561297946 | 0.344 | 0.015 | 3.23E-286 | 14 |
| RBPMS.1      | 3.85E-290 | 1.047778491 | 0.629 | 0.055 | 8.85E-286 | 14 |
| HSF4         | 7.04E-287 | 0.53067326  | 0.359 | 0.017 | 1.62E-282 | 14 |
| MT3          | 1.85E-284 | 1.80612603  | 0.51  | 0.037 | 4.26E-280 | 14 |
| C14orf105    | 4.85E-284 | 0.520440631 | 0.305 | 0.012 | 1.11E-279 | 14 |

|             |           |             |       |       |           |    |
|-------------|-----------|-------------|-------|-------|-----------|----|
| TMEM91      | 3.69E-274 | 1.058527014 | 0.614 | 0.056 | 8.48E-270 | 14 |
| CRNDE       | 4.26E-274 | 0.610358369 | 0.402 | 0.023 | 9.79E-270 | 14 |
| KRT18.1     | 7.32E-269 | 1.29039571  | 0.784 | 0.093 | 1.68E-264 | 14 |
| ENPEP       | 4.76E-261 | 0.702104945 | 0.44  | 0.029 | 1.09E-256 | 14 |
| SLC39A14    | 1.03E-258 | 0.719060306 | 0.444 | 0.03  | 2.37E-254 | 14 |
| BHLHE41.2   | 3.25E-258 | 1.137931375 | 0.649 | 0.069 | 7.47E-254 | 14 |
| SEZ6L2      | 4.17E-257 | 0.521101191 | 0.263 | 0.009 | 9.59E-253 | 14 |
| SEPP1.2     | 1.04E-256 | 1.194869549 | 0.861 | 0.117 | 2.38E-252 | 14 |
| ALDOC       | 4.72E-256 | 0.875396578 | 0.552 | 0.047 | 1.08E-251 | 14 |
| PFKP        | 5.66E-256 | 1.279433065 | 0.788 | 0.1   | 1.30E-251 | 14 |
| DPCD        | 1.02E-255 | 0.715095036 | 0.483 | 0.036 | 2.34E-251 | 14 |
| GATM.1      | 5.79E-254 | 1.041890952 | 0.618 | 0.062 | 1.33E-249 | 14 |
| TMEM176A.2  | 1.45E-253 | 1.619849577 | 0.873 | 0.133 | 3.33E-249 | 14 |
| SSPN.1      | 2.58E-251 | 0.765510582 | 0.486 | 0.038 | 5.94E-247 | 14 |
| SLC37A4     | 1.49E-247 | 0.845746953 | 0.537 | 0.047 | 3.43E-243 | 14 |
| FOLR1       | 7.08E-246 | 0.610731486 | 0.34  | 0.018 | 1.63E-241 | 14 |
| AEBP1       | 1.48E-245 | 0.738679948 | 0.386 | 0.024 | 3.40E-241 | 14 |
| MGLL.1      | 1.35E-240 | 0.8521163   | 0.61  | 0.062 | 3.11E-236 | 14 |
| PHLDA3      | 2.41E-240 | 0.65769178  | 0.382 | 0.024 | 5.54E-236 | 14 |
| P4HA1       | 3.88E-239 | 0.988560684 | 0.707 | 0.086 | 8.91E-235 | 14 |
| SDC2        | 6.42E-238 | 0.596959983 | 0.486 | 0.039 | 1.48E-233 | 14 |
| FHL1        | 1.32E-236 | 0.95792889  | 0.517 | 0.045 | 3.02E-232 | 14 |
| WFDC2       | 3.89E-235 | 0.84584096  | 0.498 | 0.042 | 8.93E-231 | 14 |
| ALDH1A1.1   | 1.35E-233 | 1.130443607 | 0.672 | 0.08  | 3.10E-229 | 14 |
| NMB         | 1.03E-232 | 1.823048403 | 0.506 | 0.045 | 2.38E-228 | 14 |
| EGFR        | 3.68E-231 | 0.597348362 | 0.375 | 0.024 | 8.45E-227 | 14 |
| C1S         | 3.90E-231 | 0.884453336 | 0.479 | 0.04  | 8.97E-227 | 14 |
| ATP1B1.3    | 7.96E-231 | 1.410363326 | 0.826 | 0.124 | 1.83E-226 | 14 |
| EFEMP2      | 8.60E-231 | 0.578077902 | 0.417 | 0.029 | 1.98E-226 | 14 |
| TMEM45A     | 4.83E-230 | 0.581944855 | 0.332 | 0.018 | 1.11E-225 | 14 |
| DIXDC1      | 1.11E-228 | 0.545469463 | 0.363 | 0.022 | 2.54E-224 | 14 |
| CAV1.3      | 1.89E-228 | 1.593481981 | 0.834 | 0.124 | 4.34E-224 | 14 |
| C1orf186    | 4.94E-228 | 0.893705667 | 0.537 | 0.05  | 1.13E-223 | 14 |
| C19orf33    | 7.55E-228 | 0.719610447 | 0.537 | 0.05  | 1.73E-223 | 14 |
| NDRG1.1     | 9.86E-227 | 1.620678817 | 0.819 | 0.13  | 2.27E-222 | 14 |
| SERINC2     | 1.45E-226 | 0.67857914  | 0.425 | 0.032 | 3.33E-222 | 14 |
| INSIG2      | 9.13E-226 | 0.917666459 | 0.653 | 0.077 | 2.10E-221 | 14 |
| PDLIM1.1    | 2.40E-225 | 1.084360954 | 0.788 | 0.108 | 5.52E-221 | 14 |
| CAV2.1      | 1.32E-224 | 0.804350651 | 0.622 | 0.067 | 3.04E-220 | 14 |
| WDR34       | 7.16E-223 | 0.675509712 | 0.421 | 0.031 | 1.65E-218 | 14 |
| C1R         | 6.34E-222 | 1.032512273 | 0.506 | 0.046 | 1.46E-217 | 14 |
| PMP22       | 6.35E-222 | 0.942965106 | 0.541 | 0.053 | 1.46E-217 | 14 |
| HSD3B7      | 1.70E-221 | 0.646001072 | 0.39  | 0.027 | 3.90E-217 | 14 |
| TMEM176B.2  | 4.30E-221 | 1.473244563 | 0.857 | 0.141 | 9.89E-217 | 14 |
| CALD1.1     | 3.06E-218 | 0.897549226 | 0.876 | 0.135 | 7.03E-214 | 14 |
| GPRC5C      | 1.30E-216 | 0.58879534  | 0.378 | 0.026 | 2.99E-212 | 14 |
| S100A16.1   | 9.77E-216 | 0.75259085  | 0.629 | 0.071 | 2.25E-211 | 14 |
| MYL6B       | 1.87E-214 | 0.885929899 | 0.653 | 0.08  | 4.29E-210 | 14 |
| RRAD        | 1.45E-212 | 1.032131214 | 0.32  | 0.019 | 3.33E-208 | 14 |
| MIR4458HG   | 2.36E-212 | 0.681506906 | 0.606 | 0.068 | 5.43E-208 | 14 |
| SNHG19      | 1.58E-208 | 0.7996202   | 0.517 | 0.051 | 3.63E-204 | 14 |
| PDZK1IP1.2  | 3.98E-207 | 0.897798247 | 0.757 | 0.111 | 9.14E-203 | 14 |
| AKR1C3      | 2.01E-202 | 0.595254314 | 0.61  | 0.073 | 4.61E-198 | 14 |
| PRDX4       | 3.38E-202 | 0.959067107 | 0.734 | 0.11  | 7.77E-198 | 14 |
| ENO2        | 3.32E-201 | 0.732351196 | 0.444 | 0.039 | 7.64E-197 | 14 |
| CLU.3       | 2.04E-200 | 1.668099164 | 0.911 | 0.185 | 4.69E-196 | 14 |
| NDUFA4L2.13 | 4.64E-199 | 2.609597026 | 0.992 | 0.275 | 1.07E-194 | 14 |
| CCL28       | 1.19E-198 | 0.606532297 | 0.39  | 0.03  | 2.75E-194 | 14 |

|                |           |             |       |       |           |    |
|----------------|-----------|-------------|-------|-------|-----------|----|
| KCTD3          | 1.32E-198 | 0.569920778 | 0.355 | 0.025 | 3.04E-194 | 14 |
| TMEM37         | 2.75E-197 | 0.871015181 | 0.456 | 0.042 | 6.31E-193 | 14 |
| NT5C3B         | 8.95E-193 | 0.692461773 | 0.517 | 0.055 | 2.06E-188 | 14 |
| PGRMC1         | 3.33E-192 | 1.139171957 | 0.707 | 0.108 | 7.64E-188 | 14 |
| CFAP36         | 3.43E-192 | 0.815064013 | 0.649 | 0.085 | 7.88E-188 | 14 |
| S100A13.2      | 5.30E-192 | 0.940114246 | 0.772 | 0.121 | 1.22E-187 | 14 |
| FAM213A.1      | 1.01E-190 | 1.016021433 | 0.695 | 0.102 | 2.31E-186 | 14 |
| NNMT.14        | 2.42E-190 | 2.525163096 | 1     | 0.286 | 5.56E-186 | 14 |
| CRYAB.13       | 1.82E-189 | 2.230678711 | 0.985 | 0.245 | 4.19E-185 | 14 |
| YBX3.2         | 4.67E-189 | 1.569510938 | 0.853 | 0.172 | 1.07E-184 | 14 |
| EIF4EBP1       | 7.43E-188 | 1.483435681 | 0.819 | 0.153 | 1.71E-183 | 14 |
| PDK4.6         | 1.05E-187 | 2.180049016 | 0.892 | 0.19  | 2.42E-183 | 14 |
| C10orf10.2     | 1.18E-187 | 1.563916774 | 0.695 | 0.104 | 2.71E-183 | 14 |
| FARP1          | 4.74E-187 | 0.665520317 | 0.44  | 0.042 | 1.09E-182 | 14 |
| CYB5A.4        | 1.08E-186 | 1.420054225 | 0.954 | 0.215 | 2.48E-182 | 14 |
| NEK6           | 1.33E-186 | 0.663235519 | 0.44  | 0.042 | 3.06E-182 | 14 |
| TRIP6          | 3.56E-186 | 0.647673961 | 0.467 | 0.048 | 8.17E-182 | 14 |
| PDZK1          | 7.26E-186 | 0.587682642 | 0.336 | 0.024 | 1.67E-181 | 14 |
| EPB41L4A-AS1.2 | 9.57E-186 | 1.429190954 | 0.799 | 0.147 | 2.20E-181 | 14 |
| SMPDL3A        | 2.36E-183 | 0.602806719 | 0.417 | 0.038 | 5.42E-179 | 14 |
| PRKCDBP.1      | 2.84E-182 | 0.725649519 | 0.591 | 0.074 | 6.52E-178 | 14 |
| CNN3.2         | 1.73E-179 | 0.584851306 | 0.691 | 0.097 | 3.99E-175 | 14 |
| SPINT2.2       | 5.50E-178 | 1.074275757 | 0.784 | 0.138 | 1.26E-173 | 14 |
| FAIM           | 9.25E-178 | 0.546323964 | 0.386 | 0.033 | 2.13E-173 | 14 |
| SLC16A3.2      | 8.51E-175 | 1.188501603 | 0.822 | 0.159 | 1.96E-170 | 14 |
| TMEM27         | 2.42E-174 | 0.561821324 | 0.351 | 0.028 | 5.57E-170 | 14 |
| HSBP1L1        | 2.52E-174 | 0.593822328 | 0.463 | 0.049 | 5.79E-170 | 14 |
| CRYZ           | 9.79E-174 | 0.571225071 | 0.502 | 0.057 | 2.25E-169 | 14 |
| HNMT.3         | 1.26E-172 | 0.904465112 | 0.672 | 0.105 | 2.90E-168 | 14 |
| PLEKHA1.1      | 3.19E-170 | 0.992381697 | 0.695 | 0.11  | 7.33E-166 | 14 |
| IMPA2          | 6.68E-170 | 0.630544346 | 0.405 | 0.039 | 1.53E-165 | 14 |
| DOC2A          | 8.39E-169 | 0.559191837 | 0.266 | 0.016 | 1.93E-164 | 14 |
| HPCAL1.3       | 8.33E-168 | 1.278511952 | 0.811 | 0.16  | 1.91E-163 | 14 |
| PMM1           | 2.82E-167 | 0.703480717 | 0.548 | 0.07  | 6.47E-163 | 14 |
| CD151.2        | 2.71E-166 | 1.180725928 | 0.876 | 0.188 | 6.22E-162 | 14 |
| RP11-798M19.6  | 3.59E-166 | 0.815126138 | 0.552 | 0.073 | 8.25E-162 | 14 |
| ADIRF.9        | 6.18E-165 | 1.204314573 | 0.954 | 0.228 | 1.42E-160 | 14 |
| MAP3K13        | 1.36E-162 | 0.860476157 | 0.649 | 0.103 | 3.13E-158 | 14 |
| GPX3.3         | 6.47E-162 | 1.381657122 | 0.78  | 0.154 | 1.49E-157 | 14 |
| PTGR1          | 1.38E-161 | 0.668735579 | 0.444 | 0.049 | 3.17E-157 | 14 |
| TGM2.1         | 1.44E-161 | 0.756069226 | 0.471 | 0.054 | 3.32E-157 | 14 |
| DARS.2         | 3.74E-160 | 1.385964038 | 0.849 | 0.196 | 8.59E-156 | 14 |
| FAM134B        | 1.79E-159 | 0.575815439 | 0.39  | 0.037 | 4.11E-155 | 14 |
| RPF2           | 6.65E-158 | 0.757421789 | 0.529 | 0.07  | 1.53E-153 | 14 |
| GADD45A.1      | 4.88E-155 | 0.868799666 | 0.625 | 0.096 | 1.12E-150 | 14 |
| BLVRB.2        | 3.53E-154 | 0.871392634 | 0.772 | 0.149 | 8.11E-150 | 14 |
| RAB13.3        | 1.57E-153 | 0.698741039 | 0.714 | 0.126 | 3.62E-149 | 14 |
| MT1F           | 3.59E-151 | 1.233634074 | 0.68  | 0.119 | 8.24E-147 | 14 |
| SHMT1          | 5.94E-151 | 0.649435827 | 0.425 | 0.048 | 1.37E-146 | 14 |
| MXI1           | 1.32E-150 | 0.707102214 | 0.49  | 0.063 | 3.03E-146 | 14 |
| UGDH           | 7.97E-149 | 0.510211524 | 0.39  | 0.04  | 1.83E-144 | 14 |
| FAHD1          | 2.88E-148 | 0.540709754 | 0.421 | 0.047 | 6.61E-144 | 14 |
| MT1X.9         | 2.82E-147 | 3.551826191 | 0.869 | 0.272 | 6.48E-143 | 14 |
| TSPAN12.1      | 3.83E-145 | 0.57188743  | 0.363 | 0.036 | 8.81E-141 | 14 |
| GATM-AS1       | 3.15E-143 | 0.649517036 | 0.259 | 0.018 | 7.24E-139 | 14 |
| SCCPDH         | 6.39E-143 | 0.592661455 | 0.506 | 0.07  | 1.47E-138 | 14 |
| RASSF4.2       | 6.40E-142 | 1.096191871 | 0.753 | 0.153 | 1.47E-137 | 14 |
| BNIP3L.2       | 1.24E-141 | 1.307699619 | 0.853 | 0.22  | 2.85E-137 | 14 |



|            |           |              |       |       |           |    |
|------------|-----------|--------------|-------|-------|-----------|----|
| KIF1BP     | 2.42E-139 | 0.548666663  | 0.378 | 0.041 | 5.55E-135 | 14 |
| CCNB1IP1   | 3.82E-139 | 0.668675693  | 0.525 | 0.076 | 8.78E-135 | 14 |
| DEFB1.1    | 1.13E-137 | 0.778876374  | 0.533 | 0.081 | 2.59E-133 | 14 |
| SMIM3      | 1.54E-135 | 0.923557997  | 0.544 | 0.086 | 3.53E-131 | 14 |
| TMSB4X.6   | 1.97E-135 | -3.165445068 | 0.988 | 0.976 | 4.52E-131 | 14 |
| SLC25A37.3 | 9.85E-135 | 1.038343778  | 0.71  | 0.144 | 2.26E-130 | 14 |
| CES4A      | 2.42E-134 | 0.544326976  | 0.324 | 0.031 | 5.55E-130 | 14 |
| VKORC1.1   | 4.80E-133 | 1.020643399  | 0.788 | 0.184 | 1.10E-128 | 14 |
| SPP1.6     | 2.95E-132 | 0.880074317  | 0.857 | 0.204 | 6.78E-128 | 14 |
| POLD2      | 9.29E-132 | 0.65275554   | 0.475 | 0.067 | 2.13E-127 | 14 |
| ANXA4.3    | 1.26E-130 | 1.170341258  | 0.703 | 0.148 | 2.89E-126 | 14 |
| PLIN2.10   | 1.46E-130 | 1.825582405  | 0.946 | 0.324 | 3.36E-126 | 14 |
| TPM1.2     | 8.65E-130 | 0.802131662  | 0.807 | 0.183 | 1.99E-125 | 14 |
| C5orf46    | 3.25E-129 | 0.929163992  | 0.355 | 0.039 | 7.47E-125 | 14 |
| B2M.10     | 7.61E-129 | -2.255765185 | 1     | 0.988 | 1.75E-124 | 14 |
| SPATS2L    | 5.49E-128 | 0.83256172   | 0.625 | 0.115 | 1.26E-123 | 14 |
| PPP1R16A   | 2.44E-126 | 0.547567113  | 0.336 | 0.035 | 5.62E-122 | 14 |
| EGR1.2     | 9.87E-126 | 1.30362676   | 0.656 | 0.132 | 2.27E-121 | 14 |
| SERPING1   | 1.35E-125 | 0.725373009  | 0.579 | 0.1   | 3.11E-121 | 14 |
| KHK        | 8.01E-125 | 0.626465212  | 0.386 | 0.047 | 1.84E-120 | 14 |
| ENO1.11    | 1.34E-124 | 2.068714447  | 0.992 | 0.586 | 3.07E-120 | 14 |
| STC1.1     | 1.69E-124 | 0.543177656  | 0.459 | 0.063 | 3.88E-120 | 14 |
| LDHA.11    | 2.79E-123 | 1.746875485  | 0.992 | 0.571 | 6.40E-119 | 14 |
| BOD1       | 5.64E-123 | 0.554871771  | 0.432 | 0.059 | 1.30E-118 | 14 |
| RCN1.1     | 1.88E-122 | 0.688651468  | 0.521 | 0.085 | 4.33E-118 | 14 |
| PIGP       | 4.88E-122 | 0.649988627  | 0.61  | 0.113 | 1.12E-117 | 14 |
| BEX2       | 7.35E-122 | 0.516515753  | 0.382 | 0.046 | 1.69E-117 | 14 |
| ESD.2      | 5.00E-121 | 0.959296121  | 0.834 | 0.224 | 1.15E-116 | 14 |
| AK2        | 7.23E-121 | 0.701883574  | 0.672 | 0.136 | 1.66E-116 | 14 |
| PLA2G16    | 9.14E-121 | 0.94535216   | 0.753 | 0.174 | 2.10E-116 | 14 |
| IGFBP4.1   | 3.03E-120 | 0.63345872   | 0.61  | 0.108 | 6.97E-116 | 14 |
| C16orf13.2 | 9.74E-120 | 0.976623394  | 0.857 | 0.227 | 2.24E-115 | 14 |
| GCSH       | 1.14E-119 | 0.52583499   | 0.498 | 0.078 | 2.63E-115 | 14 |
| RBP5       | 4.97E-119 | 0.530006951  | 0.417 | 0.056 | 1.14E-114 | 14 |
| MIF.11     | 7.76E-119 | 1.582798948  | 0.977 | 0.497 | 1.78E-114 | 14 |
| FXD2.1     | 1.44E-118 | 0.972499633  | 0.637 | 0.124 | 3.31E-114 | 14 |
| ABCA1      | 2.75E-118 | 0.531383674  | 0.39  | 0.051 | 6.33E-114 | 14 |
| POLR2H     | 1.65E-117 | 0.561808425  | 0.544 | 0.093 | 3.79E-113 | 14 |
| ALDH3A2    | 1.77E-117 | 0.562611831  | 0.409 | 0.056 | 4.08E-113 | 14 |
| SLC39A1.1  | 1.51E-116 | 0.669951056  | 0.629 | 0.126 | 3.46E-112 | 14 |
| LGALS3.6   | 5.80E-116 | 1.229165036  | 0.842 | 0.234 | 1.33E-111 | 14 |
| RHOB.12    | 7.02E-116 | 1.75955145   | 0.942 | 0.337 | 1.61E-111 | 14 |
| TSC22D1.3  | 9.89E-116 | 0.837892229  | 0.761 | 0.173 | 2.27E-111 | 14 |
| TMEM205    | 1.12E-114 | 0.698260326  | 0.676 | 0.144 | 2.57E-110 | 14 |
| IGFBP3.11  | 1.44E-114 | 1.041861751  | 0.849 | 0.233 | 3.31E-110 | 14 |
| BCKDK      | 1.64E-114 | 0.64037554   | 0.544 | 0.098 | 3.78E-110 | 14 |
| TMCC1      | 8.68E-114 | 0.589608492  | 0.394 | 0.053 | 1.99E-109 | 14 |
| PGRMC2     | 6.24E-113 | 0.524668811  | 0.529 | 0.09  | 1.43E-108 | 14 |
| ERO1A      | 3.33E-112 | 0.611051747  | 0.475 | 0.076 | 7.65E-108 | 14 |
| UBR4       | 1.13E-110 | 0.639490274  | 0.533 | 0.094 | 2.59E-106 | 14 |
| CYR61.1    | 1.95E-110 | 0.534702863  | 0.34  | 0.04  | 4.47E-106 | 14 |
| MRPS18B    | 7.32E-108 | 0.705904489  | 0.641 | 0.135 | 1.68E-103 | 14 |
| ARPC1A.1   | 1.33E-107 | 0.654595027  | 0.618 | 0.126 | 3.06E-103 | 14 |
| RAB34.1    | 1.76E-107 | 0.600319965  | 0.471 | 0.079 | 4.04E-103 | 14 |
| PTTG1IP.2  | 3.02E-107 | 0.779899692  | 0.71  | 0.167 | 6.95E-103 | 14 |
| DAB2.3     | 1.09E-106 | 0.930197663  | 0.68  | 0.152 | 2.50E-102 | 14 |
| RNASET2.13 | 2.67E-106 | 1.502968212  | 0.946 | 0.35  | 6.15E-102 | 14 |
| FAM162A.2  | 6.14E-106 | 0.679682096  | 0.734 | 0.175 | 1.41E-101 | 14 |

|           |           |              |       |       |           |    |
|-----------|-----------|--------------|-------|-------|-----------|----|
| LINC00998 | 6.61E-106 | 0.676088366  | 0.741 | 0.179 | 1.52E-101 | 14 |
| SOCS3.3   | 9.55E-106 | 1.236856732  | 0.656 | 0.151 | 2.19E-101 | 14 |
| MORF4L2.2 | 2.98E-104 | 0.615652029  | 0.726 | 0.17  | 6.85E-100 | 14 |
| CISD1     | 5.01E-104 | 0.530102769  | 0.548 | 0.104 | 1.15E-99  | 14 |
| LRRC41    | 3.36E-103 | 0.509374524  | 0.452 | 0.073 | 7.73E-99  | 14 |
| HCFC1R1.1 | 3.37E-103 | 0.641693137  | 0.587 | 0.119 | 7.74E-99  | 14 |
| CTHRC1    | 5.17E-103 | 0.510741136  | 0.286 | 0.031 | 1.19E-98  | 14 |
| TNIP1.2   | 7.50E-103 | 0.738811022  | 0.668 | 0.151 | 1.72E-98  | 14 |
| WRB       | 2.21E-102 | 0.521776287  | 0.421 | 0.065 | 5.07E-98  | 14 |
| PGK1.9    | 2.91E-102 | 1.326958645  | 0.961 | 0.441 | 6.68E-98  | 14 |
| SOD2.11   | 8.09E-102 | 1.695581927  | 0.846 | 0.283 | 1.86E-97  | 14 |
| ZFAS1.10  | 3.86E-101 | 1.508472019  | 0.954 | 0.475 | 8.86E-97  | 14 |
| CDKN1A.1  | 2.35E-99  | 0.635355116  | 0.56  | 0.112 | 5.40E-95  | 14 |
| ACTN1     | 3.11E-99  | 0.588633624  | 0.444 | 0.075 | 7.15E-95  | 14 |
| PCBD1     | 3.74E-99  | 0.584904963  | 0.571 | 0.117 | 8.60E-95  | 14 |
| ERGIC1.1  | 8.89E-99  | 0.656450009  | 0.583 | 0.123 | 2.04E-94  | 14 |
| VIM.11    | 1.91E-98  | 1.509375901  | 1     | 0.767 | 4.39E-94  | 14 |
| ALDOA.5   | 3.81E-97  | 1.312963646  | 0.996 | 0.63  | 8.76E-93  | 14 |
| GAPDH.8   | 8.78E-97  | 1.26673523   | 1     | 0.863 | 2.02E-92  | 14 |
| CERS2     | 9.30E-97  | 0.594748732  | 0.517 | 0.098 | 2.14E-92  | 14 |
| CRYL1     | 1.25E-95  | 0.582705787  | 0.483 | 0.09  | 2.88E-91  | 14 |
| POLR2I.2  | 1.53E-95  | 0.695694128  | 0.764 | 0.203 | 3.52E-91  | 14 |
| C5orf15   | 1.90E-95  | 0.563736785  | 0.49  | 0.092 | 4.37E-91  | 14 |
| RNF187    | 5.33E-95  | 0.569025521  | 0.541 | 0.106 | 1.23E-90  | 14 |
| TP1.8     | 8.83E-95  | 1.398129868  | 0.992 | 0.556 | 2.03E-90  | 14 |
| WDR60.1   | 1.22E-94  | 0.62688911   | 0.514 | 0.098 | 2.81E-90  | 14 |
| NFIA.1    | 1.31E-94  | 0.585697535  | 0.444 | 0.077 | 3.02E-90  | 14 |
| HLA-B.11  | 1.22E-93  | -1.954447254 | 0.942 | 0.914 | 2.79E-89  | 14 |
| RPLP0.9   | 9.17E-93  | 1.241009754  | 0.996 | 0.84  | 2.11E-88  | 14 |
| NDUFC1.9  | 9.73E-93  | 0.782997365  | 0.83  | 0.26  | 2.24E-88  | 14 |
| VDAC1.5   | 1.04E-92  | 0.923085435  | 0.83  | 0.267 | 2.39E-88  | 14 |
| PKM.7     | 1.15E-92  | 1.32419728   | 0.95  | 0.424 | 2.63E-88  | 14 |
| SERPINE2  | 1.38E-92  | 0.534090223  | 0.297 | 0.037 | 3.17E-88  | 14 |
| LAPTM4A.9 | 9.16E-92  | 0.932105019  | 0.938 | 0.341 | 2.10E-87  | 14 |
| SNHG8.5   | 5.93E-91  | 1.271041922  | 0.927 | 0.425 | 1.36E-86  | 14 |
| RBM47.3   | 6.14E-91  | 0.501866586  | 0.421 | 0.074 | 1.41E-86  | 14 |
| ARL1      | 4.61E-90  | 0.538427096  | 0.506 | 0.099 | 1.06E-85  | 14 |
| NFIC.1    | 3.59E-89  | 0.587889355  | 0.533 | 0.112 | 8.25E-85  | 14 |
| KDSR.1    | 7.89E-89  | 0.547623362  | 0.49  | 0.097 | 1.81E-84  | 14 |
| CYB5R3.3  | 9.67E-89  | 0.654020325  | 0.683 | 0.177 | 2.22E-84  | 14 |
| RPS5.7    | 2.64E-88  | 1.131162939  | 1     | 0.838 | 6.06E-84  | 14 |
| AIG1      | 4.61E-88  | 0.534751667  | 0.448 | 0.084 | 1.06E-83  | 14 |
| TIPIN     | 1.22E-87  | 0.684395749  | 0.595 | 0.137 | 2.81E-83  | 14 |
| FLOT1.1   | 6.94E-87  | 0.536595209  | 0.672 | 0.17  | 1.59E-82  | 14 |
| MT2A.14   | 1.04E-86  | 2.839795017  | 0.95  | 0.654 | 2.38E-82  | 14 |
| PEBP1.10  | 1.68E-86  | 1.118665934  | 0.923 | 0.38  | 3.87E-82  | 14 |
| ODF3B.1   | 6.10E-86  | 0.558757959  | 0.479 | 0.097 | 1.40E-81  | 14 |
| SNX10.3   | 9.73E-86  | 0.684730589  | 0.71  | 0.188 | 2.24E-81  | 14 |
| MT1E.3    | 1.23E-85  | 2.595226154  | 0.598 | 0.165 | 2.82E-81  | 14 |
| IFITM3.12 | 2.35E-85  | 0.765349589  | 0.954 | 0.367 | 5.40E-81  | 14 |
| NDUFS4    | 4.18E-85  | 0.683815349  | 0.718 | 0.197 | 9.61E-81  | 14 |
| SYPL1.1   | 7.51E-85  | 0.573823535  | 0.691 | 0.18  | 1.73E-80  | 14 |
| APEX1.2   | 1.30E-84  | 0.674879205  | 0.718 | 0.196 | 2.98E-80  | 14 |
| NDUFB4.9  | 1.40E-84  | 0.919121522  | 0.934 | 0.401 | 3.21E-80  | 14 |
| MRPS33    | 1.48E-84  | 0.508661281  | 0.595 | 0.138 | 3.41E-80  | 14 |
| EBPL      | 4.94E-84  | 0.504100279  | 0.459 | 0.089 | 1.14E-79  | 14 |
| MGST3.10  | 3.54E-83  | 0.786275085  | 0.873 | 0.296 | 8.14E-79  | 14 |
| SELM.2    | 1.41E-82  | 0.616913437  | 0.68  | 0.175 | 3.24E-78  | 14 |

|             |          |              |       |       |          |    |
|-------------|----------|--------------|-------|-------|----------|----|
| CNDP2.2     | 1.46E-82 | 0.739926988  | 0.722 | 0.203 | 3.35E-78 | 14 |
| HES1.2      | 9.09E-82 | 0.581452382  | 0.429 | 0.078 | 2.09E-77 | 14 |
| SEC61G.7    | 2.64E-81 | 1.045027232  | 0.931 | 0.428 | 6.07E-77 | 14 |
| RPL36.11    | 3.56E-81 | 1.018400805  | 1     | 0.911 | 8.17E-77 | 14 |
| DDIT4.8     | 1.49E-80 | 1.734244116  | 0.95  | 0.509 | 3.43E-76 | 14 |
| MRPL23      | 2.33E-80 | 0.587919074  | 0.68  | 0.184 | 5.35E-76 | 14 |
| PDCD5.2     | 4.01E-79 | 0.586019038  | 0.656 | 0.176 | 9.22E-75 | 14 |
| NDUFA5.2    | 1.12E-78 | 0.622747447  | 0.776 | 0.23  | 2.56E-74 | 14 |
| RPS8.7      | 4.91E-78 | 0.987842273  | 0.996 | 0.916 | 1.13E-73 | 14 |
| PCNP.5      | 3.13E-77 | 0.777299336  | 0.838 | 0.281 | 7.19E-73 | 14 |
| ST13.8      | 5.13E-77 | 0.947729561  | 0.884 | 0.362 | 1.18E-72 | 14 |
| HSPB1.12    | 8.77E-77 | 1.046977163  | 0.965 | 0.424 | 2.02E-72 | 14 |
| FUNDC2.2    | 5.41E-76 | 0.619830244  | 0.656 | 0.18  | 1.24E-71 | 14 |
| SNRPE.3     | 5.72E-76 | 0.775394446  | 0.846 | 0.296 | 1.31E-71 | 14 |
| SRGN.10     | 6.75E-76 | -3.079070177 | 0.541 | 0.796 | 1.55E-71 | 14 |
| TCEAL4.2    | 9.78E-76 | 0.506533347  | 0.595 | 0.151 | 2.25E-71 | 14 |
| STOML2      | 3.90E-75 | 0.50836705   | 0.595 | 0.15  | 8.96E-71 | 14 |
| OCIAD2.10   | 4.09E-75 | 0.79683691   | 0.803 | 0.251 | 9.40E-71 | 14 |
| MYC         | 4.99E-75 | 0.646001657  | 0.359 | 0.064 | 1.15E-70 | 14 |
| CEBPD.9     | 1.01E-74 | 0.909192236  | 0.846 | 0.268 | 2.32E-70 | 14 |
| GPI         | 1.27E-74 | 0.583980402  | 0.579 | 0.145 | 2.91E-70 | 14 |
| YWHAE.8     | 4.97E-74 | 0.726082152  | 0.842 | 0.302 | 1.14E-69 | 14 |
| MMP24-AS1.1 | 6.43E-74 | 0.545076154  | 0.622 | 0.164 | 1.48E-69 | 14 |
| HLA-C.10    | 1.33E-73 | -1.763859813 | 0.958 | 0.881 | 3.06E-69 | 14 |
| ZBTB20.2    | 1.42E-73 | 0.59849894   | 0.587 | 0.145 | 3.27E-69 | 14 |
| VDAC2.4     | 1.58E-73 | 0.74988577   | 0.83  | 0.288 | 3.62E-69 | 14 |
| TNFSF10.3   | 6.34E-73 | 0.62679841   | 0.602 | 0.159 | 1.46E-68 | 14 |
| RPL7.7      | 1.41E-72 | 0.815505826  | 0.992 | 0.918 | 3.23E-68 | 14 |
| TOMM20.3    | 4.38E-72 | 0.819418148  | 0.834 | 0.3   | 1.01E-67 | 14 |
| S100A10.7   | 1.51E-71 | 1.043308924  | 0.988 | 0.603 | 3.46E-67 | 14 |
| PHPT1.6     | 1.73E-71 | 0.69689509   | 0.795 | 0.266 | 3.97E-67 | 14 |
| TMEM123.6   | 1.78E-71 | 0.639331132  | 0.795 | 0.261 | 4.08E-67 | 14 |
| EIF4B.4     | 2.23E-70 | 0.900568977  | 0.853 | 0.348 | 5.13E-66 | 14 |
| RPS27L.7    | 2.48E-70 | 1.040760361  | 0.938 | 0.464 | 5.71E-66 | 14 |
| PERP        | 8.84E-70 | 0.612361566  | 0.359 | 0.066 | 2.03E-65 | 14 |
| PLSCR1.4    | 5.61E-69 | 0.581047235  | 0.575 | 0.154 | 1.29E-64 | 14 |
| PSMC1       | 2.12E-67 | 0.510139317  | 0.664 | 0.193 | 4.87E-63 | 14 |
| CFDP1.1     | 6.14E-67 | 0.524589599  | 0.637 | 0.184 | 1.41E-62 | 14 |
| NENF        | 7.96E-67 | 0.517074748  | 0.645 | 0.188 | 1.83E-62 | 14 |
| ACTB.9      | 8.34E-67 | -1.535903015 | 0.992 | 0.928 | 1.92E-62 | 14 |
| RPL24.7     | 1.48E-66 | 0.87035287   | 0.996 | 0.85  | 3.41E-62 | 14 |
| ACAA2.1     | 5.38E-66 | 0.511147192  | 0.575 | 0.155 | 1.24E-61 | 14 |
| KCNQ1OT1.1  | 5.61E-65 | 0.539853481  | 0.421 | 0.091 | 1.29E-60 | 14 |
| DUSP23      | 2.62E-64 | 0.600445595  | 0.591 | 0.166 | 6.03E-60 | 14 |
| CAMLG       | 4.09E-64 | 0.507261808  | 0.687 | 0.207 | 9.39E-60 | 14 |
| UBC.5       | 1.64E-63 | 1.135347361  | 1     | 0.837 | 3.77E-59 | 14 |
| FTH1.13     | 2.55E-63 | 0.747458151  | 1     | 0.962 | 5.86E-59 | 14 |
| PRDX6.6     | 2.99E-63 | 0.64804824   | 0.83  | 0.316 | 6.88E-59 | 14 |
| RPL9.5      | 3.32E-63 | 0.820031884  | 0.996 | 0.9   | 7.62E-59 | 14 |
| TUBB.9      | 3.38E-63 | 0.691554754  | 0.849 | 0.339 | 7.78E-59 | 14 |
| SERPINE1.1  | 3.96E-63 | 0.627699936  | 0.282 | 0.047 | 9.10E-59 | 14 |
| AQP3        | 5.51E-63 | 0.671661801  | 0.34  | 0.065 | 1.27E-58 | 14 |
| RAD23A.3    | 6.56E-63 | 0.618439014  | 0.764 | 0.261 | 1.51E-58 | 14 |
| ZFAND5.8    | 1.02E-62 | 0.843781124  | 0.788 | 0.298 | 2.34E-58 | 14 |
| ATF3.1      | 1.99E-62 | 0.922976624  | 0.529 | 0.143 | 4.56E-58 | 14 |
| TMEM14C.3   | 2.15E-62 | 0.575273134  | 0.691 | 0.218 | 4.95E-58 | 14 |
| SLC17A3     | 4.86E-62 | 0.568405593  | 0.266 | 0.043 | 1.12E-57 | 14 |
| NPM1.7      | 6.01E-62 | 0.997631572  | 0.961 | 0.693 | 1.38E-57 | 14 |

|             |          |              |       |       |          |    |
|-------------|----------|--------------|-------|-------|----------|----|
| TBCA.6      | 9.08E-62 | 0.749400912  | 0.88  | 0.394 | 2.09E-57 | 14 |
| GSTP1.8     | 1.18E-61 | 0.824353995  | 0.961 | 0.48  | 2.71E-57 | 14 |
| FOXO3.4     | 1.91E-61 | 0.597899925  | 0.517 | 0.137 | 4.40E-57 | 14 |
| NELFE       | 2.22E-61 | 0.505918208  | 0.544 | 0.148 | 5.09E-57 | 14 |
| RSL1D1.5    | 2.32E-61 | 0.644167459  | 0.776 | 0.28  | 5.34E-57 | 14 |
| CHCHD10.9   | 2.48E-61 | 0.546535718  | 0.737 | 0.237 | 5.71E-57 | 14 |
| PGF         | 9.54E-61 | 1.414082469  | 0.286 | 0.049 | 2.19E-56 | 14 |
| ATF4.2      | 4.66E-59 | 0.605724452  | 0.83  | 0.313 | 1.07E-54 | 14 |
| RSL24D1.3   | 1.21E-58 | 0.750265844  | 0.834 | 0.349 | 2.78E-54 | 14 |
| RPL18.6     | 1.68E-58 | 0.798784591  | 0.996 | 0.868 | 3.87E-54 | 14 |
| RPS19BP1.2  | 1.92E-58 | 0.500372405  | 0.726 | 0.243 | 4.42E-54 | 14 |
| RPL18A.7    | 1.01E-57 | 0.738587635  | 1     | 0.928 | 2.32E-53 | 14 |
| RPL5.5      | 1.34E-57 | 0.785330972  | 0.992 | 0.85  | 3.08E-53 | 14 |
| RPL3.8      | 4.49E-57 | 0.661645561  | 0.996 | 0.931 | 1.03E-52 | 14 |
| IGHA1.1     | 5.06E-57 | -1.497488511 | 0.432 | 0.098 | 1.16E-52 | 14 |
| BTF3.3      | 5.57E-57 | 0.788946784  | 0.981 | 0.721 | 1.28E-52 | 14 |
| FBL.4       | 1.24E-56 | 0.595721409  | 0.714 | 0.249 | 2.85E-52 | 14 |
| HSP90AB1.6  | 2.15E-56 | 0.816767473  | 0.981 | 0.595 | 4.95E-52 | 14 |
| ZNF90.5     | 3.17E-56 | 0.727569856  | 0.826 | 0.344 | 7.29E-52 | 14 |
| MZT2A.9     | 4.06E-56 | 0.504092154  | 0.764 | 0.262 | 9.32E-52 | 14 |
| PTPRC.12    | 2.91E-55 | -2.585422959 | 0.174 | 0.625 | 6.68E-51 | 14 |
| RPS4X.8     | 5.51E-55 | 0.641912867  | 0.992 | 0.937 | 1.27E-50 | 14 |
| MRFAP1.4    | 1.60E-54 | 0.511086876  | 0.807 | 0.301 | 3.68E-50 | 14 |
| SERPINA1.13 | 1.67E-54 | 0.994115502  | 0.761 | 0.269 | 3.83E-50 | 14 |
| MZT2B.4     | 6.40E-54 | 0.615973826  | 0.838 | 0.353 | 1.47E-49 | 14 |
| GLRX.7      | 1.72E-53 | 0.747046801  | 0.757 | 0.289 | 3.96E-49 | 14 |
| EIF3E.6     | 2.74E-53 | 0.855555379  | 0.946 | 0.537 | 6.31E-49 | 14 |
| HLA-A.10    | 4.28E-53 | -1.287839893 | 0.973 | 0.892 | 9.85E-49 | 14 |
| RPL8.4      | 6.14E-53 | 0.6543431    | 0.996 | 0.88  | 1.41E-48 | 14 |
| NACA.6      | 6.92E-53 | 0.700378783  | 0.988 | 0.8   | 1.59E-48 | 14 |
| RPL41.10    | 1.53E-52 | 0.608164503  | 1     | 0.976 | 3.51E-48 | 14 |
| LSM5        | 4.85E-52 | 0.508172289  | 0.641 | 0.213 | 1.11E-47 | 14 |
| RPL11.4     | 7.49E-52 | 0.594058475  | 1     | 0.937 | 1.72E-47 | 14 |
| PGAM1.6     | 1.72E-51 | 0.643055305  | 0.83  | 0.352 | 3.96E-47 | 14 |
| RPL10.8     | 2.14E-51 | 0.58615603   | 1     | 0.974 | 4.93E-47 | 14 |
| ARHGDIB.7   | 3.61E-51 | -2.22012491  | 0.382 | 0.678 | 8.29E-47 | 14 |
| RPL22.6     | 1.50E-50 | 0.70512346   | 0.988 | 0.807 | 3.45E-46 | 14 |
| RPS6.6      | 2.13E-50 | 0.690321121  | 0.988 | 0.942 | 4.89E-46 | 14 |
| P4HB.5      | 5.98E-50 | 0.650184727  | 0.803 | 0.337 | 1.37E-45 | 14 |
| DUSP1.9     | 1.45E-49 | 1.033017592  | 0.992 | 0.789 | 3.33E-45 | 14 |
| TIPARP.1    | 1.74E-49 | 0.682623504  | 0.452 | 0.126 | 4.01E-45 | 14 |
| EEF1A1.8    | 6.50E-49 | 0.666196037  | 1     | 0.967 | 1.49E-44 | 14 |
| NDUFS5.4    | 3.68E-48 | 0.655350037  | 0.934 | 0.525 | 8.45E-44 | 14 |
| BTG1.13     | 5.00E-48 | -1.860290111 | 0.919 | 0.841 | 1.15E-43 | 14 |
| CCT4        | 5.21E-48 | 0.508316522  | 0.66  | 0.229 | 1.20E-43 | 14 |
| MALAT1.13   | 7.56E-48 | -1.153963872 | 1     | 0.982 | 1.74E-43 | 14 |
| EEF2.5      | 1.25E-47 | 0.747029672  | 0.965 | 0.68  | 2.86E-43 | 14 |
| ANXA2.8     | 7.38E-47 | 0.666379075  | 0.865 | 0.384 | 1.70E-42 | 14 |
| RTN4.11     | 1.22E-46 | 0.623848511  | 0.819 | 0.341 | 2.81E-42 | 14 |
| TXN.9       | 4.74E-46 | 0.527182925  | 0.849 | 0.38  | 1.09E-41 | 14 |
| RPS2.7      | 5.63E-46 | 0.58022039   | 0.996 | 0.943 | 1.29E-41 | 14 |
| CEBPB.11    | 1.20E-45 | 0.854754611  | 0.745 | 0.321 | 2.76E-41 | 14 |
| RPL36A.8    | 2.56E-45 | 0.783243186  | 0.969 | 0.798 | 5.89E-41 | 14 |
| TAF1D.6     | 4.76E-45 | 0.580904898  | 0.768 | 0.31  | 1.09E-40 | 14 |
| S100A4.12   | 6.92E-45 | -2.718901474 | 0.556 | 0.702 | 1.59E-40 | 14 |
| RPS13.6     | 2.73E-44 | 0.620957817  | 1     | 0.876 | 6.28E-40 | 14 |
| ATP5E.8     | 2.94E-44 | -1.331940758 | 0.888 | 0.814 | 6.76E-40 | 14 |
| CXCR4.10    | 4.07E-44 | -2.432129722 | 0.822 | 0.774 | 9.36E-40 | 14 |

|                 |          |              |       |       |          |    |
|-----------------|----------|--------------|-------|-------|----------|----|
| HLA-E.12        | 7.11E-44 | -1.557216432 | 0.842 | 0.789 | 1.63E-39 | 14 |
| TPT1.9          | 2.77E-43 | 0.599490816  | 0.996 | 0.922 | 6.36E-39 | 14 |
| RPS28.7         | 6.00E-43 | 0.512495827  | 1     | 0.946 | 1.38E-38 | 14 |
| CD63.11         | 2.31E-42 | 0.547246921  | 0.961 | 0.511 | 5.32E-38 | 14 |
| ZFP36L2.11      | 3.00E-42 | -2.638468166 | 0.548 | 0.701 | 6.90E-38 | 14 |
| RPS18.8         | 5.62E-42 | 0.546050092  | 1     | 0.958 | 1.29E-37 | 14 |
| TMSB10.8        | 6.59E-42 | 0.784988357  | 0.996 | 0.96  | 1.51E-37 | 14 |
| RGS1.14         | 3.51E-41 | -3.208853595 | 0.622 | 0.698 | 8.07E-37 | 14 |
| GLTSCR2.6       | 1.06E-39 | 0.663284477  | 0.931 | 0.581 | 2.43E-35 | 14 |
| RPL35A.8        | 1.36E-39 | 0.516211738  | 0.988 | 0.916 | 3.12E-35 | 14 |
| RPL13.7         | 3.04E-39 | 0.510101728  | 1     | 0.964 | 6.99E-35 | 14 |
| RPL38.6         | 2.91E-38 | 0.597667183  | 0.985 | 0.865 | 6.68E-34 | 14 |
| RPL34.8         | 4.22E-38 | 0.519502711  | 0.996 | 0.952 | 9.70E-34 | 14 |
| CORO1A.10       | 4.31E-38 | -2.13136751  | 0.259 | 0.57  | 9.90E-34 | 14 |
| RPL37.6         | 1.10E-37 | 0.544706951  | 0.988 | 0.907 | 2.52E-33 | 14 |
| HCST.10         | 1.97E-37 | -2.177437179 | 0.22  | 0.55  | 4.53E-33 | 14 |
| HSD17B7         | 6.34E-37 | 0.525399394  | 0.297 | 0.076 | 1.46E-32 | 14 |
| IER2.6          | 8.89E-37 | 0.818480778  | 0.792 | 0.394 | 2.04E-32 | 14 |
| LAPTM5.11       | 1.51E-36 | -2.087599616 | 0.274 | 0.573 | 3.47E-32 | 14 |
| UQCRH.3         | 3.30E-36 | 0.510364524  | 0.865 | 0.456 | 7.59E-32 | 14 |
| EZR.5           | 7.14E-36 | 0.695955924  | 0.722 | 0.317 | 1.64E-31 | 14 |
| CFL1.3          | 1.85E-35 | -1.458453207 | 0.803 | 0.746 | 4.24E-31 | 14 |
| CITED2.11       | 2.12E-35 | 0.713234914  | 0.637 | 0.261 | 4.88E-31 | 14 |
| GMFG.7          | 2.32E-35 | -1.86576471  | 0.263 | 0.561 | 5.33E-31 | 14 |
| RPS21.8         | 1.57E-34 | 0.559004346  | 0.992 | 0.86  | 3.60E-30 | 14 |
| FYB.12          | 8.79E-34 | -1.921992905 | 0.112 | 0.466 | 2.02E-29 | 14 |
| CD74.10         | 1.57E-33 | -2.454436832 | 0.861 | 0.793 | 3.62E-29 | 14 |
| COX7C.4         | 3.42E-33 | 0.507004565  | 0.977 | 0.749 | 7.87E-29 | 14 |
| SLC25A6.6       | 4.10E-33 | 0.547549639  | 0.965 | 0.649 | 9.42E-29 | 14 |
| RPL31.10        | 7.91E-33 | 0.508918381  | 0.981 | 0.906 | 1.82E-28 | 14 |
| SH3BGRL3.10     | 1.49E-32 | -1.737996342 | 0.61  | 0.683 | 3.43E-28 | 14 |
| RPS25.9         | 1.83E-32 | 0.501437819  | 0.996 | 0.916 | 4.20E-28 | 14 |
| ARPC2.8         | 1.95E-32 | -1.754437371 | 0.517 | 0.64  | 4.49E-28 | 14 |
| RPL6.7          | 6.04E-32 | 0.51353154   | 1     | 0.88  | 1.39E-27 | 14 |
| DDX5.9          | 7.79E-32 | -1.079933257 | 0.857 | 0.81  | 1.79E-27 | 14 |
| RPL35.7         | 1.56E-31 | 0.543898751  | 0.981 | 0.896 | 3.58E-27 | 14 |
| CELF2.10        | 2.12E-31 | -1.690889951 | 0.085 | 0.432 | 4.86E-27 | 14 |
| PFN1.8          | 6.26E-31 | -1.336683035 | 0.846 | 0.759 | 1.44E-26 | 14 |
| CCNI.3          | 8.36E-31 | 0.558781186  | 0.927 | 0.587 | 1.92E-26 | 14 |
| CD37.10         | 9.42E-30 | -1.690092181 | 0.154 | 0.469 | 2.16E-25 | 14 |
| CD53.8          | 7.15E-29 | -1.703639421 | 0.181 | 0.476 | 1.64E-24 | 14 |
| IGKC.10         | 1.29E-28 | -1.344193187 | 0.691 | 0.288 | 2.97E-24 | 14 |
| HLA-DPB1.11     | 1.67E-28 | -2.814429897 | 0.525 | 0.634 | 3.85E-24 | 14 |
| PNRC1.7         | 3.05E-28 | 0.524800037  | 0.95  | 0.628 | 7.01E-24 | 14 |
| CD2.13          | 3.09E-28 | -2.366105949 | 0.17  | 0.462 | 7.09E-24 | 14 |
| EVL.13          | 3.16E-28 | -1.770463969 | 0.216 | 0.5   | 7.27E-24 | 14 |
| GADD45B.2       | 3.25E-28 | 0.525219464  | 0.556 | 0.228 | 7.47E-24 | 14 |
| HNRNPA1.5       | 4.96E-28 | 0.536022443  | 0.973 | 0.774 | 1.14E-23 | 14 |
| RP11-347P5.1.13 | 6.84E-28 | -1.900460825 | 0.054 | 0.381 | 1.57E-23 | 14 |
| CD44.9          | 1.11E-27 | -1.747811971 | 0.212 | 0.496 | 2.56E-23 | 14 |
| CYBA.9          | 1.21E-27 | -1.595843067 | 0.699 | 0.687 | 2.79E-23 | 14 |
| TMA7.7          | 7.88E-27 | -1.407203513 | 0.718 | 0.695 | 1.81E-22 | 14 |
| MYL12A.5        | 1.16E-26 | -1.546778431 | 0.714 | 0.689 | 2.67E-22 | 14 |
| SLA.11          | 1.47E-26 | -1.617100405 | 0.097 | 0.405 | 3.37E-22 | 14 |
| STK4.10         | 1.57E-26 | -1.749574437 | 0.197 | 0.477 | 3.62E-22 | 14 |
| IGFBP7.12       | 3.49E-26 | -1.375563508 | 0.811 | 0.371 | 8.03E-22 | 14 |
| ZFP36L1.9       | 4.77E-26 | 0.5420758    | 0.71  | 0.36  | 1.10E-21 | 14 |
| CYTIP.12        | 1.17E-25 | -1.832529637 | 0.22  | 0.48  | 2.68E-21 | 14 |

|             |          |              |       |       |          |    |
|-------------|----------|--------------|-------|-------|----------|----|
| TGFBI.3     | 1.22E-25 | 1.088786832  | 0.452 | 0.178 | 2.80E-21 | 14 |
| TRAC.14     | 2.45E-25 | -2.313382598 | 0.158 | 0.437 | 5.62E-21 | 14 |
| CD3E.13     | 6.56E-25 | -1.81696504  | 0.116 | 0.403 | 1.51E-20 | 14 |
| CD69.13     | 2.75E-24 | -2.69964613  | 0.336 | 0.532 | 6.32E-20 | 14 |
| CD48.12     | 3.18E-24 | -1.432526438 | 0.089 | 0.38  | 7.31E-20 | 14 |
| CCL5.13     | 8.96E-24 | -3.223776157 | 0.417 | 0.564 | 2.06E-19 | 14 |
| CD3D.14     | 3.60E-23 | -2.275218103 | 0.263 | 0.479 | 8.27E-19 | 14 |
| LSP1.13     | 6.65E-23 | -1.583302413 | 0.193 | 0.439 | 1.53E-18 | 14 |
| GPSM3.9     | 1.07E-21 | -1.398077345 | 0.139 | 0.395 | 2.46E-17 | 14 |
| IL2RG.14    | 2.06E-21 | -1.515583094 | 0.112 | 0.377 | 4.74E-17 | 14 |
| CD52.11     | 2.81E-21 | -2.344577914 | 0.436 | 0.551 | 6.46E-17 | 14 |
| HLA-DPA1.12 | 3.23E-21 | -2.732209775 | 0.475 | 0.572 | 7.42E-17 | 14 |
| LCP1.11     | 3.69E-21 | -1.456487299 | 0.158 | 0.409 | 8.47E-17 | 14 |
| RAC2.13     | 4.23E-21 | -1.418501981 | 0.112 | 0.377 | 9.73E-17 | 14 |
| ITGB2.11    | 5.26E-21 | -1.505826785 | 0.178 | 0.419 | 1.21E-16 | 14 |
| FXYS.7      | 5.71E-21 | -1.478776304 | 0.286 | 0.485 | 1.31E-16 | 14 |
| ARPC1B.6    | 8.72E-21 | -1.567665368 | 0.386 | 0.527 | 2.00E-16 | 14 |
| STK17B.10   | 3.00E-20 | -1.527799342 | 0.162 | 0.405 | 6.89E-16 | 14 |
| GZMA.13     | 1.65E-19 | -2.367972415 | 0.212 | 0.423 | 3.78E-15 | 14 |
| FOS.12      | 2.40E-19 | 0.608355477  | 0.927 | 0.677 | 5.52E-15 | 14 |
| WIPF1.12    | 2.76E-19 | -1.310918173 | 0.104 | 0.348 | 6.35E-15 | 14 |
| ETS1.12     | 1.41E-18 | -1.470310961 | 0.108 | 0.343 | 3.23E-14 | 14 |
| SH3KBP1.10  | 1.71E-18 | -1.089435839 | 0.066 | 0.313 | 3.94E-14 | 14 |
| EVI2B.8     | 2.34E-18 | -1.270760807 | 0.1   | 0.34  | 5.38E-14 | 14 |
| CD3G.13     | 4.38E-18 | -1.48181476  | 0.062 | 0.298 | 1.01E-13 | 14 |
| EVI2A.10    | 5.90E-18 | -1.188399131 | 0.05  | 0.284 | 1.35E-13 | 14 |
| PTMA.5      | 7.58E-18 | -0.50760807  | 0.992 | 0.916 | 1.74E-13 | 14 |
| HBA2.10     | 1.08E-17 | -2.126569883 | 0.541 | 0.245 | 2.49E-13 | 14 |
| GIMAP7.12   | 1.16E-17 | -1.343877726 | 0.054 | 0.289 | 2.66E-13 | 14 |
| GIMAP4.9    | 2.10E-17 | -1.260271376 | 0.108 | 0.343 | 4.82E-13 | 14 |
| LIMD2.13    | 2.59E-17 | -1.222126609 | 0.085 | 0.315 | 5.96E-13 | 14 |
| PIK3IP1.13  | 2.60E-17 | -1.402813696 | 0.139 | 0.362 | 5.98E-13 | 14 |
| HLA-F.9     | 4.10E-17 | -1.370689084 | 0.251 | 0.442 | 9.42E-13 | 14 |
| DUSP2.13    | 4.92E-17 | -2.244592756 | 0.259 | 0.434 | 1.13E-12 | 14 |
| CST7.12     | 6.30E-17 | -2.058058762 | 0.197 | 0.393 | 1.45E-12 | 14 |
| KIAA1551.10 | 9.60E-17 | -1.37132284  | 0.124 | 0.339 | 2.21E-12 | 14 |
| SAMSN1.8    | 5.24E-16 | -1.397089692 | 0.112 | 0.326 | 1.20E-11 | 14 |
| MYO1F.9     | 5.26E-16 | -1.039756489 | 0.058 | 0.276 | 1.21E-11 | 14 |
| SMCHD1.5    | 6.05E-16 | -1.26899638  | 0.12  | 0.331 | 1.39E-11 | 14 |
| LCK.14      | 6.38E-16 | -1.249955945 | 0.077 | 0.291 | 1.47E-11 | 14 |
| FNBP1.12    | 6.91E-16 | -1.251474228 | 0.17  | 0.371 | 1.59E-11 | 14 |
| HCLS1.8     | 8.70E-16 | -1.209989469 | 0.12  | 0.326 | 2.00E-11 | 14 |
| EPAS1.2     | 1.27E-15 | -0.571725782 | 0.297 | 0.112 | 2.91E-11 | 14 |
| RCSD1.9     | 1.36E-15 | -0.954999809 | 0.042 | 0.253 | 3.13E-11 | 14 |
| UCP2.10     | 1.54E-15 | -1.28804965  | 0.151 | 0.35  | 3.54E-11 | 14 |
| SEPT6.10    | 1.63E-15 | -1.075038632 | 0.069 | 0.281 | 3.74E-11 | 14 |
| AAK1.13     | 1.71E-15 | -1.261540922 | 0.178 | 0.374 | 3.92E-11 | 14 |
| BIN2.9      | 3.08E-15 | -1.090226328 | 0.046 | 0.253 | 7.08E-11 | 14 |
| ITM2A.13    | 4.31E-15 | -1.604483971 | 0.112 | 0.314 | 9.89E-11 | 14 |
| HLA-DRA.14  | 4.62E-15 | -2.707623694 | 0.788 | 0.671 | 1.06E-10 | 14 |
| AKAP13.9    | 5.64E-15 | -1.202524456 | 0.266 | 0.435 | 1.30E-10 | 14 |
| RPS29.10    | 7.36E-15 | -0.523230353 | 0.985 | 0.92  | 1.69E-10 | 14 |
| RGS10.8     | 1.06E-14 | -1.225162676 | 0.1   | 0.299 | 2.43E-10 | 14 |
| SPARC.3     | 1.54E-14 | -1.177778824 | 0.417 | 0.178 | 3.53E-10 | 14 |
| STK17A.12   | 1.64E-14 | -1.420426394 | 0.189 | 0.37  | 3.77E-10 | 14 |
| TNFAIP3.13  | 1.74E-14 | -1.734244099 | 0.309 | 0.45  | 3.99E-10 | 14 |
| PRDM1.9     | 2.44E-14 | -1.381315005 | 0.097 | 0.295 | 5.60E-10 | 14 |
| TRBC2.13    | 2.55E-14 | -1.800576646 | 0.208 | 0.38  | 5.86E-10 | 14 |

|             |          |              |       |       |             |    |
|-------------|----------|--------------|-------|-------|-------------|----|
| APOBEC3G.11 | 3.83E-14 | -1.281495235 | 0.077 | 0.275 | 8.79E-10    | 14 |
| REL.9       | 5.20E-14 | -1.288895826 | 0.139 | 0.325 | 1.19E-09    | 14 |
| ISG20.10    | 7.20E-14 | -1.343954942 | 0.185 | 0.364 | 1.66E-09    | 14 |
| APOE.9      | 9.47E-14 | -1.129535712 | 0.811 | 0.431 | 2.18E-09    | 14 |
| SERF2.4     | 1.56E-13 | -0.627078781 | 0.95  | 0.815 | 3.58E-09    | 14 |
| EMB.10      | 1.65E-13 | -1.036783853 | 0.081 | 0.273 | 3.80E-09    | 14 |
| SYTL3.12    | 2.37E-13 | -1.249258162 | 0.093 | 0.28  | 5.44E-09    | 14 |
| IL10RA.10   | 4.48E-13 | -0.96158822  | 0.073 | 0.262 | 1.03E-08    | 14 |
| PPP2R5C.10  | 4.87E-13 | -1.415632531 | 0.236 | 0.393 | 1.12E-08    | 14 |
| HBB.8       | 9.05E-13 | -2.211308494 | 0.699 | 0.386 | 2.08E-08    | 14 |
| ELF1.11     | 1.13E-12 | -1.2264294   | 0.313 | 0.443 | 2.60E-08    | 14 |
| ACAP1.14    | 1.74E-12 | -1.273111742 | 0.17  | 0.336 | 3.99E-08    | 14 |
| GLIPR1.10   | 2.36E-12 | -1.090146701 | 0.127 | 0.302 | 5.43E-08    | 14 |
| ACTA2       | 2.37E-12 | -1.156997679 | 0.309 | 0.132 | 5.46E-08    | 14 |
| CD27.13     | 2.41E-12 | -1.544811662 | 0.097 | 0.271 | 5.53E-08    | 14 |
| ABRACL.6    | 2.49E-12 | -0.955024809 | 0.108 | 0.29  | 5.73E-08    | 14 |
| FYN.9       | 2.63E-12 | -1.138298112 | 0.093 | 0.269 | 6.04E-08    | 14 |
| TRAF3IP3.13 | 2.84E-12 | -0.994478425 | 0.081 | 0.259 | 6.52E-08    | 14 |
| SMAP2.10    | 6.73E-12 | -1.031039757 | 0.131 | 0.301 | 1.55E-07    | 14 |
| CTSS.11     | 1.02E-11 | -1.62563621  | 0.22  | 0.365 | 2.34E-07    | 14 |
| LTB.13      | 1.15E-11 | -1.697646185 | 0.143 | 0.304 | 2.63E-07    | 14 |
| DOCK8.10    | 1.97E-11 | -0.965582093 | 0.127 | 0.294 | 4.54E-07    | 14 |
| HLA-DRB1.12 | 2.35E-11 | -2.433399377 | 0.699 | 0.588 | 5.41E-07    | 14 |
| CD96.14     | 2.54E-11 | -1.12070874  | 0.089 | 0.252 | 5.84E-07    | 14 |
| ANKRD44.9   | 3.15E-11 | -0.881884655 | 0.093 | 0.261 | 7.25E-07    | 14 |
| ALOX5AP.10  | 3.65E-11 | -1.520152091 | 0.181 | 0.331 | 8.40E-07    | 14 |
| PRKCH.9     | 3.65E-11 | -0.983019305 | 0.093 | 0.256 | 8.40E-07    | 14 |
| NR4A2.10    | 4.45E-11 | -1.294561162 | 0.12  | 0.279 | 1.02E-06    | 14 |
| S100A9.12   | 5.52E-11 | -1.945232047 | 0.517 | 0.246 | 1.27E-06    | 14 |
| CRIP1.10    | 9.72E-11 | -1.252361884 | 0.135 | 0.296 | 2.23E-06    | 14 |
| GZMK.14     | 1.38E-10 | -2.593529229 | 0.247 | 0.368 | 3.17E-06    | 14 |
| TRBC1.13    | 1.60E-10 | -2.015514028 | 0.228 | 0.356 | 3.67E-06    | 14 |
| PIK3R1.11   | 3.38E-10 | -1.137455905 | 0.162 | 0.311 | 7.76E-06    | 14 |
| RGS2.13     | 3.66E-10 | -1.735102324 | 0.205 | 0.338 | 8.42E-06    | 14 |
| AKNA.9      | 5.12E-10 | -0.966791755 | 0.112 | 0.264 | 1.18E-05    | 14 |
| RGCC.12     | 1.06E-09 | -1.772703508 | 0.17  | 0.31  | 2.44E-05    | 14 |
| PCSK7.12    | 1.36E-09 | -1.141366863 | 0.189 | 0.323 | 3.13E-05    | 14 |
| IL7R.12     | 1.59E-09 | -2.148476382 | 0.174 | 0.306 | 3.64E-05    | 14 |
| CD7.11      | 1.75E-09 | -1.463314394 | 0.17  | 0.303 | 4.02E-05    | 14 |
| S100A8.4    | 2.45E-09 | -2.06926973  | 0.429 | 0.207 | 5.63E-05    | 14 |
| MYL6.5      | 2.57E-09 | -0.624611175 | 0.946 | 0.794 | 5.89E-05    | 14 |
| NKG7.14     | 3.07E-09 | -2.618073857 | 0.367 | 0.428 | 7.04E-05    | 14 |
| CCNH.9      | 4.07E-09 | -1.04923918  | 0.151 | 0.287 | 9.35E-05    | 14 |
| GRN.13      | 6.45E-09 | -0.570779155 | 0.51  | 0.249 | 0.000148192 | 14 |
| HLA-DQA1.10 | 7.47E-09 | -1.891631141 | 0.228 | 0.346 | 0.000171568 | 14 |
| CARD16.8    | 8.77E-09 | -1.165369299 | 0.197 | 0.32  | 0.000201517 | 14 |
| CREM.8      | 9.98E-09 | -1.25635735  | 0.154 | 0.283 | 0.000229302 | 14 |
| PRPF38B.11  | 2.50E-08 | -1.096950516 | 0.378 | 0.436 | 0.000575135 | 14 |
| TRIM22.6    | 2.62E-08 | -0.79082953  | 0.12  | 0.251 | 0.000602159 | 14 |
| C9orf16.4   | 2.71E-08 | -0.913921529 | 0.243 | 0.352 | 0.000622871 | 14 |
| NKTR.9      | 6.79E-08 | -1.033025112 | 0.243 | 0.348 | 0.001560918 | 14 |
| FAM49B.8    | 8.31E-08 | -1.044560086 | 0.251 | 0.341 | 0.001908796 | 14 |
| COTL1.8     | 8.62E-08 | -1.462327167 | 0.425 | 0.434 | 0.001981703 | 14 |
| OAZ1.9      | 9.20E-08 | -0.640183122 | 0.927 | 0.732 | 0.002114637 | 14 |
| CCL4.14     | 1.16E-07 | -2.783473208 | 0.421 | 0.44  | 0.002656699 | 14 |
| CLEC2D.13   | 1.83E-07 | -1.224615705 | 0.208 | 0.308 | 0.004211554 | 14 |
| ARHGEF1.10  | 2.74E-07 | -0.873256342 | 0.151 | 0.264 | 0.006289946 | 14 |
| RHOA.9      | 3.12E-07 | -1.035261186 | 0.56  | 0.507 | 0.007178911 | 14 |

|               |           |              |       |       |             |    |
|---------------|-----------|--------------|-------|-------|-------------|----|
| ICAM3.12      | 3.31E-07  | -0.930456827 | 0.166 | 0.274 | 0.007611839 | 14 |
| FOXP1.8       | 5.32E-07  | -0.935950763 | 0.147 | 0.26  | 0.012227289 | 14 |
| RSRP1.8       | 7.60E-07  | -0.952058909 | 0.359 | 0.414 | 0.017464342 | 14 |
| RNF213.9      | 1.58E-06  | -0.997621847 | 0.328 | 0.388 | 0.03630687  | 14 |
| GNAS.6        | 1.93E-06  | -0.960394882 | 0.266 | 0.346 | 0.04430199  | 14 |
| PSAP.12       | 1.99E-06  | -0.511136143 | 0.838 | 0.461 | 0.045691512 | 14 |
| DEFB1.2       | 0         | 4.541399046  | 0.808 | 0.076 | 0           | 15 |
| S100A1        | 0         | 3.869418961  | 0.776 | 0.029 | 0           | 15 |
| KRT19         | 0         | 3.845960186  | 0.763 | 0.053 | 0           | 15 |
| MT1G.2        | 0         | 3.829161785  | 0.624 | 0.05  | 0           | 15 |
| C19orf33.1    | 0         | 3.319988293  | 0.641 | 0.048 | 0           | 15 |
| GSTA2         | 0         | 3.018463002  | 0.531 | 0.027 | 0           | 15 |
| MACROD2       | 0         | 2.440107478  | 0.371 | 0.014 | 0           | 15 |
| RP11-284H18.1 | 0         | 1.969157114  | 0.327 | 0.008 | 0           | 15 |
| PPP1R14D      | 0         | 1.90195669   | 0.331 | 0.01  | 0           | 15 |
| FABP6.1       | 3.49E-305 | 2.586478167  | 0.51  | 0.034 | 8.03E-301   | 15 |
| RP11-1C1.6    | 4.41E-295 | 2.125691612  | 0.371 | 0.017 | 1.01E-290   | 15 |
| SAA1.2        | 1.54E-291 | 6.52376672   | 0.824 | 0.118 | 3.53E-287   | 15 |
| EGFR-AS1      | 1.43E-279 | 1.904029028  | 0.302 | 0.011 | 3.29E-275   | 15 |
| PDZK1IP1.3    | 2.19E-279 | 3.683311046  | 0.8   | 0.111 | 5.04E-275   | 15 |
| LYG1          | 2.53E-275 | 1.818508859  | 0.314 | 0.013 | 5.82E-271   | 15 |
| WFDC2.1       | 1.18E-260 | 2.962087604  | 0.514 | 0.042 | 2.72E-256   | 15 |
| C5orf46.1     | 2.83E-259 | 2.804997372  | 0.486 | 0.037 | 6.51E-255   | 15 |
| FXD2.2        | 3.21E-259 | 3.57165864   | 0.808 | 0.122 | 7.37E-255   | 15 |
| GSTA1         | 9.73E-254 | 1.994181653  | 0.347 | 0.018 | 2.24E-249   | 15 |
| REG1A         | 1.92E-245 | 3.735600624  | 0.535 | 0.05  | 4.41E-241   | 15 |
| TSPAN1        | 2.90E-236 | 2.377055296  | 0.433 | 0.032 | 6.65E-232   | 15 |
| SAA2          | 3.64E-232 | 5.522237648  | 0.641 | 0.082 | 8.37E-228   | 15 |
| SLPI          | 6.95E-219 | 2.843679963  | 0.408 | 0.031 | 1.60E-214   | 15 |
| CRYAB.14      | 3.83E-208 | 3.650213692  | 0.939 | 0.247 | 8.80E-204   | 15 |
| MT1E.4        | 4.97E-204 | 3.455476341  | 0.816 | 0.162 | 1.14E-199   | 15 |
| UGT2A3        | 2.51E-195 | 1.76250973   | 0.273 | 0.014 | 5.77E-191   | 15 |
| ADIRF.10      | 1.12E-194 | 3.387563593  | 0.906 | 0.229 | 2.58E-190   | 15 |
| CD24.4        | 5.34E-190 | 2.869557289  | 0.82  | 0.166 | 1.23E-185   | 15 |
| MAOA          | 4.82E-189 | 1.839227491  | 0.306 | 0.019 | 1.11E-184   | 15 |
| KRT18.2       | 3.36E-178 | 2.525602937  | 0.633 | 0.096 | 7.73E-174   | 15 |
| RBP5.1        | 2.19E-174 | 2.420310861  | 0.478 | 0.055 | 5.03E-170   | 15 |
| S100A13.3     | 2.44E-171 | 2.547122196  | 0.682 | 0.123 | 5.60E-167   | 15 |
| MGST1.3       | 1.84E-166 | 2.439225957  | 0.633 | 0.103 | 4.23E-162   | 15 |
| CYB5A.5       | 4.39E-163 | 3.263527071  | 0.82  | 0.219 | 1.01E-158   | 15 |
| PRAP1         | 3.57E-161 | 1.729984179  | 0.273 | 0.018 | 8.21E-157   | 15 |
| NNMT.15       | 3.01E-154 | 2.797710675  | 0.918 | 0.288 | 6.92E-150   | 15 |
| TPM1.3        | 3.30E-151 | 3.092525339  | 0.759 | 0.184 | 7.59E-147   | 15 |
| TMEM176A.3    | 4.77E-151 | 2.641885888  | 0.673 | 0.137 | 1.10E-146   | 15 |
| NDUFC1.10     | 1.80E-149 | 3.163308611  | 0.833 | 0.261 | 4.13E-145   | 15 |
| BNIP3.3       | 5.64E-148 | 2.313752291  | 0.657 | 0.124 | 1.30E-143   | 15 |
| CLU.4         | 1.70E-144 | 3.150906516  | 0.751 | 0.188 | 3.91E-140   | 15 |
| IFI27.2       | 3.51E-137 | 2.358217972  | 0.686 | 0.145 | 8.07E-133   | 15 |
| MT1F.1        | 1.23E-135 | 2.554555907  | 0.608 | 0.121 | 2.83E-131   | 15 |
| MALAT1.14     | 4.23E-131 | -4.233263233 | 0.878 | 0.984 | 9.73E-127   | 15 |
| NDUFA4L2.14   | 2.21E-128 | 2.280866335  | 0.873 | 0.278 | 5.07E-124   | 15 |
| MIF.12        | 5.40E-125 | 3.304303674  | 0.906 | 0.498 | 1.24E-120   | 15 |
| SNHG25.1      | 1.96E-122 | 3.477950415  | 0.567 | 0.118 | 4.49E-118   | 15 |
| CXCL14.2      | 5.85E-120 | 1.833371056  | 0.42  | 0.059 | 1.35E-115   | 15 |
| GAPDH.9       | 7.90E-118 | 2.465090949  | 0.971 | 0.864 | 1.82E-113   | 15 |
| TMSB4X.7      | 3.78E-116 | -2.638463818 | 0.82  | 0.979 | 8.70E-112   | 15 |
| TCEA3.1       | 1.38E-111 | 1.848706621  | 0.38  | 0.051 | 3.17E-107   | 15 |
| HCFC1R1.2     | 8.81E-111 | 2.217528005  | 0.555 | 0.12  | 2.03E-106   | 15 |



|             |           |              |       |       |           |    |
|-------------|-----------|--------------|-------|-------|-----------|----|
| KRT8.2      | 1.39E-110 | 2.010602094  | 0.502 | 0.091 | 3.20E-106 | 15 |
| LDHA.12     | 2.25E-110 | 2.850667074  | 0.927 | 0.572 | 5.17E-106 | 15 |
| CCDC146     | 1.07E-105 | 1.954989535  | 0.314 | 0.038 | 2.45E-101 | 15 |
| SERPINA1.14 | 5.63E-105 | 2.930694602  | 0.759 | 0.27  | 1.29E-100 | 15 |
| B2M.11      | 2.70E-104 | -1.801502963 | 0.947 | 0.989 | 6.21E-100 | 15 |
| FTH1.14     | 3.01E-101 | 1.936009894  | 0.996 | 0.962 | 6.93E-97  | 15 |
| TMEM27.1    | 1.47E-99  | 1.485526848  | 0.273 | 0.029 | 3.37E-95  | 15 |
| UGT2B7.1    | 1.66E-99  | 1.518476025  | 0.306 | 0.037 | 3.81E-95  | 15 |
| TMSB10.9    | 3.03E-99  | 1.634773933  | 0.992 | 0.96  | 6.95E-95  | 15 |
| MT-CO1.7    | 3.73E-97  | -2.293862858 | 0.576 | 0.932 | 8.57E-93  | 15 |
| HP          | 8.89E-95  | 3.300789041  | 0.253 | 0.027 | 2.04E-90  | 15 |
| MIR4458HG.1 | 3.99E-93  | 2.1865239    | 0.408 | 0.072 | 9.18E-89  | 15 |
| SRGN.11     | 6.00E-91  | -3.379986846 | 0.127 | 0.803 | 1.38E-86  | 15 |
| SLC17A3.1   | 1.92E-89  | 1.738966533  | 0.31  | 0.042 | 4.42E-85  | 15 |
| SMIM24      | 3.30E-86  | 1.344353351  | 0.253 | 0.029 | 7.59E-82  | 15 |
| C11orf54.1  | 5.64E-84  | 1.839709342  | 0.392 | 0.072 | 1.30E-79  | 15 |
| TGFB1.4     | 1.62E-83  | 2.790376913  | 0.592 | 0.176 | 3.73E-79  | 15 |
| MT-CO2.8    | 8.07E-80  | -2.059652829 | 0.424 | 0.883 | 1.86E-75  | 15 |
| S100A10.8   | 1.16E-79  | 2.14296136   | 0.869 | 0.605 | 2.66E-75  | 15 |
| BTG1.14     | 2.62E-79  | -2.74335455  | 0.4   | 0.85  | 6.03E-75  | 15 |
| HLA-B.12    | 3.99E-79  | -1.713091847 | 0.645 | 0.919 | 9.18E-75  | 15 |
| CTHRC1.1    | 7.67E-79  | 1.557292458  | 0.253 | 0.032 | 1.76E-74  | 15 |
| LGALS2.3    | 3.25E-78  | 2.109912217  | 0.433 | 0.094 | 7.46E-74  | 15 |
| NUPR1.4     | 1.77E-77  | 1.926917354  | 0.51  | 0.127 | 4.08E-73  | 15 |
| CD70        | 6.52E-77  | 1.756524212  | 0.335 | 0.057 | 1.50E-72  | 15 |
| ANXA4.4     | 6.89E-77  | 2.093974312  | 0.539 | 0.151 | 1.58E-72  | 15 |
| HLA-C.11    | 1.14E-76  | -1.893698555 | 0.531 | 0.889 | 2.61E-72  | 15 |
| MT-ND2.8    | 1.14E-75  | -2.027220986 | 0.42  | 0.874 | 2.63E-71  | 15 |
| DDX5.10     | 1.80E-75  | -2.239243783 | 0.249 | 0.821 | 4.13E-71  | 15 |
| CXCR4.11    | 2.41E-74  | -2.989058026 | 0.208 | 0.785 | 5.54E-70  | 15 |
| MT-ND3.10   | 2.90E-74  | -2.105852956 | 0.306 | 0.839 | 6.67E-70  | 15 |
| RPS27L.8    | 1.68E-73  | 2.069276351  | 0.804 | 0.467 | 3.87E-69  | 15 |
| SOD2.12     | 4.59E-72  | 2.206988877  | 0.702 | 0.286 | 1.05E-67  | 15 |
| JUNB.12     | 1.30E-71  | -3.187725    | 0.122 | 0.734 | 2.99E-67  | 15 |
| HLA-E.13    | 4.93E-71  | -2.231825258 | 0.241 | 0.799 | 1.13E-66  | 15 |
| DSTN.12     | 1.61E-70  | 2.000741297  | 0.698 | 0.3   | 3.70E-66  | 15 |
| ZFP36L2.12  | 2.74E-70  | -3.238635591 | 0.098 | 0.709 | 6.29E-66  | 15 |
| MT-ATP6.9   | 1.23E-69  | -1.856534865 | 0.49  | 0.866 | 2.82E-65  | 15 |
| SERPING1.1  | 1.72E-68  | 1.936711678  | 0.429 | 0.103 | 3.96E-64  | 15 |
| UQCQRQ.8    | 5.04E-68  | 2.266548826  | 0.767 | 0.456 | 1.16E-63  | 15 |
| RARRES2.3   | 1.90E-67  | 1.582431856  | 0.445 | 0.106 | 4.37E-63  | 15 |
| FTL.12      | 2.00E-67  | 0.925250542  | 0.971 | 0.936 | 4.60E-63  | 15 |
| C1orf186.1  | 5.18E-66  | 1.490632255  | 0.31  | 0.055 | 1.19E-61  | 15 |
| NAT8.1      | 1.31E-64  | 1.255960447  | 0.265 | 0.041 | 3.01E-60  | 15 |
| GNB2L1.4    | 1.63E-64  | 1.276750695  | 0.906 | 0.834 | 3.74E-60  | 15 |
| MT-CO3.8    | 8.05E-64  | -1.602675721 | 0.555 | 0.886 | 1.85E-59  | 15 |
| RPL21.7     | 1.25E-62  | -1.153875264 | 0.808 | 0.954 | 2.87E-58  | 15 |
| ALDOA.6     | 1.79E-62  | 1.702938234  | 0.845 | 0.633 | 4.12E-58  | 15 |
| S100A11.12  | 3.23E-62  | 1.614816448  | 0.853 | 0.586 | 7.43E-58  | 15 |
| RPS24.8     | 5.38E-62  | 1.033385199  | 0.963 | 0.912 | 1.24E-57  | 15 |
| ARHGDIB.8   | 3.48E-61  | -2.186206549 | 0.11  | 0.682 | 8.00E-57  | 15 |
| TMEM176B.3  | 7.88E-61  | 1.822747514  | 0.498 | 0.149 | 1.81E-56  | 15 |
| NEAT1.9     | 1.82E-60  | -2.359292422 | 0.273 | 0.761 | 4.19E-56  | 15 |
| RPL37.7     | 1.98E-60  | 1.115066642  | 0.955 | 0.908 | 4.55E-56  | 15 |
| RPS29.11    | 1.21E-59  | -1.343972231 | 0.784 | 0.924 | 2.79E-55  | 15 |
| PTPRC.13    | 1.30E-58  | -2.485355759 | 0.057 | 0.626 | 2.99E-54  | 15 |
| DUSP23.1    | 1.42E-58  | 1.963556561  | 0.506 | 0.168 | 3.27E-54  | 15 |
| KLF6.11     | 1.12E-57  | -2.514377365 | 0.098 | 0.659 | 2.57E-53  | 15 |

|              |          |              |       |       |          |    |
|--------------|----------|--------------|-------|-------|----------|----|
| FOS.13       | 4.09E-57 | -2.78195622  | 0.171 | 0.691 | 9.39E-53 | 15 |
| HRSP12.1     | 6.59E-57 | 1.599308511  | 0.29  | 0.056 | 1.51E-52 | 15 |
| GSTP1.9      | 1.17E-56 | 1.756150224  | 0.767 | 0.484 | 2.69E-52 | 15 |
| TXNIP.11     | 1.57E-56 | -2.238075604 | 0.306 | 0.772 | 3.61E-52 | 15 |
| MT-ND1.9     | 1.81E-56 | -1.727498012 | 0.327 | 0.795 | 4.17E-52 | 15 |
| ZFP36.9      | 9.71E-56 | -2.513933691 | 0.139 | 0.673 | 2.23E-51 | 15 |
| MT-ND4.9     | 4.31E-55 | -1.390076225 | 0.624 | 0.878 | 9.90E-51 | 15 |
| HSPB1.13     | 1.80E-54 | 1.683510923  | 0.755 | 0.429 | 4.15E-50 | 15 |
| ATP5I.2      | 2.31E-54 | 1.98728549   | 0.751 | 0.516 | 5.31E-50 | 15 |
| DYNLRB1.5    | 3.06E-54 | 1.971877025  | 0.641 | 0.316 | 7.02E-50 | 15 |
| S100A6.7     | 9.66E-54 | 1.644590996  | 0.882 | 0.764 | 2.22E-49 | 15 |
| HINT1.7      | 8.30E-53 | 1.514119745  | 0.808 | 0.623 | 1.91E-48 | 15 |
| OCIAD2.11    | 2.97E-52 | 1.857724731  | 0.592 | 0.255 | 6.83E-48 | 15 |
| MT-CYB.11    | 3.11E-52 | -1.505252183 | 0.388 | 0.812 | 7.14E-48 | 15 |
| JUN.9        | 4.46E-52 | -2.423427983 | 0.212 | 0.7   | 1.03E-47 | 15 |
| HLA-A.11     | 2.49E-51 | -1.35007225  | 0.665 | 0.898 | 5.73E-47 | 15 |
| PLIN2.11     | 4.65E-51 | 1.833435937  | 0.665 | 0.33  | 1.07E-46 | 15 |
| S100A4.13    | 9.75E-51 | -2.328030128 | 0.249 | 0.707 | 2.24E-46 | 15 |
| IFITM3.13    | 9.90E-51 | 1.430402916  | 0.735 | 0.372 | 2.28E-46 | 15 |
| RPL10.9      | 1.15E-50 | 1.075107937  | 0.976 | 0.975 | 2.65E-46 | 15 |
| TXN.10       | 1.85E-50 | 1.652659478  | 0.694 | 0.384 | 4.25E-46 | 15 |
| CORO1A.11    | 4.07E-50 | -2.145397563 | 0.049 | 0.574 | 9.36E-46 | 15 |
| RGS1.15      | 9.81E-50 | -2.606245621 | 0.261 | 0.704 | 2.25E-45 | 15 |
| COX7C.5      | 3.11E-49 | 1.631857696  | 0.824 | 0.752 | 7.15E-45 | 15 |
| CD52.12      | 2.31E-48 | -2.639067323 | 0.049 | 0.558 | 5.30E-44 | 15 |
| SON.10       | 2.52E-48 | -1.802525612 | 0.053 | 0.579 | 5.80E-44 | 15 |
| HCST.11      | 1.75E-47 | -2.133904188 | 0.045 | 0.553 | 4.01E-43 | 15 |
| GMFG.8       | 2.38E-47 | -1.930634037 | 0.053 | 0.565 | 5.48E-43 | 15 |
| NDUFB4.10    | 2.41E-47 | 1.783216471  | 0.682 | 0.406 | 5.54E-43 | 15 |
| GAMT         | 1.69E-46 | 1.242485431  | 0.261 | 0.054 | 3.88E-42 | 15 |
| CISD1.1      | 4.17E-46 | 1.695549765  | 0.371 | 0.108 | 9.59E-42 | 15 |
| CCL5.14      | 4.73E-46 | -3.184722033 | 0.086 | 0.57  | 1.09E-41 | 15 |
| ACTB.10      | 4.79E-46 | -1.26389881  | 0.771 | 0.932 | 1.10E-41 | 15 |
| HMGB1.9      | 6.76E-46 | -1.521828465 | 0.282 | 0.743 | 1.55E-41 | 15 |
| PPIA.5       | 7.05E-46 | 1.389876741  | 0.8   | 0.645 | 1.62E-41 | 15 |
| WBP5.2       | 1.21E-45 | 1.458356105  | 0.322 | 0.08  | 2.79E-41 | 15 |
| CD69.14      | 2.81E-45 | -2.919737016 | 0.049 | 0.537 | 6.46E-41 | 15 |
| USMG5.5      | 6.26E-45 | 1.610514073  | 0.743 | 0.525 | 1.44E-40 | 15 |
| SRSF7.12     | 1.11E-44 | -2.006891376 | 0.069 | 0.553 | 2.54E-40 | 15 |
| PTMA.6       | 1.38E-44 | -1.028016922 | 0.739 | 0.92  | 3.17E-40 | 15 |
| N4BP2L2.9    | 4.69E-43 | -1.695798011 | 0.057 | 0.538 | 1.08E-38 | 15 |
| PPDPF.9      | 2.30E-42 | 1.390616359  | 0.796 | 0.657 | 5.28E-38 | 15 |
| RPL31.11     | 4.06E-42 | 0.844298245  | 0.939 | 0.906 | 9.34E-38 | 15 |
| TPI1.9       | 4.41E-42 | 1.504965792  | 0.751 | 0.561 | 1.01E-37 | 15 |
| RNASET2.14   | 4.54E-42 | 1.716113106  | 0.657 | 0.356 | 1.04E-37 | 15 |
| SRSF5.7      | 5.53E-42 | -1.539301391 | 0.151 | 0.631 | 1.27E-37 | 15 |
| AC090498.1.8 | 1.97E-41 | 1.643892192  | 0.735 | 0.496 | 4.53E-37 | 15 |
| RPL41.11     | 2.21E-41 | 0.622075819  | 0.996 | 0.976 | 5.08E-37 | 15 |
| RPSA.8       | 2.41E-41 | -1.318829544 | 0.465 | 0.81  | 5.54E-37 | 15 |
| PCBD1.1      | 5.58E-41 | 1.436334863  | 0.38  | 0.121 | 1.28E-36 | 15 |
| MYL6B.1      | 6.43E-41 | 1.237197766  | 0.318 | 0.086 | 1.48E-36 | 15 |
| H3F3B.10     | 1.07E-39 | -1.236124016 | 0.531 | 0.84  | 2.46E-35 | 15 |
| CD3D.15      | 1.54E-39 | -2.341043303 | 0.037 | 0.482 | 3.55E-35 | 15 |
| PNISR.8      | 2.09E-39 | -1.623327728 | 0.065 | 0.518 | 4.79E-35 | 15 |
| ZFAS1.11     | 2.47E-39 | 1.515864244  | 0.714 | 0.48  | 5.67E-35 | 15 |
| PKIG.2       | 4.93E-39 | 1.185034089  | 0.257 | 0.06  | 1.13E-34 | 15 |
| GPX3.4       | 6.05E-39 | 1.80168712   | 0.433 | 0.161 | 1.39E-34 | 15 |
| ROMO1.6      | 1.09E-38 | 1.835975482  | 0.571 | 0.307 | 2.50E-34 | 15 |

|                 |          |              |       |       |          |    |
|-----------------|----------|--------------|-------|-------|----------|----|
| CYTIP.13        | 1.43E-38 | -1.91196379  | 0.041 | 0.483 | 3.29E-34 | 15 |
| STK4.11         | 1.49E-38 | -1.767688609 | 0.029 | 0.48  | 3.42E-34 | 15 |
| RPS20.7         | 2.64E-38 | 0.816476731  | 0.955 | 0.896 | 6.07E-34 | 15 |
| XIST.9          | 4.78E-38 | -2.176404779 | 0     | 0.432 | 1.10E-33 | 15 |
| ATP5H.6         | 5.45E-38 | 1.634742218  | 0.608 | 0.344 | 1.25E-33 | 15 |
| H2AFJ.1         | 6.99E-38 | 1.667705899  | 0.482 | 0.205 | 1.61E-33 | 15 |
| TNFAIP3.14      | 7.86E-38 | -2.153732452 | 0.02  | 0.455 | 1.81E-33 | 15 |
| SARAF.7         | 1.23E-37 | -1.463369867 | 0.253 | 0.686 | 2.82E-33 | 15 |
| FYB.13          | 4.44E-37 | -1.762195548 | 0.037 | 0.467 | 1.02E-32 | 15 |
| CD44.10         | 4.71E-37 | -1.780424912 | 0.069 | 0.499 | 1.08E-32 | 15 |
| SPP1.7          | 2.05E-36 | 0.726499998  | 0.522 | 0.211 | 4.70E-32 | 15 |
| PRDX1.9         | 2.78E-36 | 1.566666088  | 0.641 | 0.399 | 6.38E-32 | 15 |
| MCL1.8          | 3.18E-36 | -1.637432255 | 0.086 | 0.522 | 7.30E-32 | 15 |
| HSP90AA1.8      | 6.98E-36 | -1.586842569 | 0.229 | 0.661 | 1.60E-31 | 15 |
| NIT2            | 7.00E-36 | 1.559599384  | 0.331 | 0.103 | 1.61E-31 | 15 |
| EVL.14          | 9.28E-36 | -1.587686542 | 0.065 | 0.503 | 2.13E-31 | 15 |
| ATP5J.8         | 1.30E-35 | 1.661919112  | 0.624 | 0.39  | 2.98E-31 | 15 |
| NFKBIA.13       | 1.52E-35 | -1.910704814 | 0.139 | 0.565 | 3.49E-31 | 15 |
| CYSTM1.3        | 2.02E-35 | 1.499988237  | 0.388 | 0.136 | 4.65E-31 | 15 |
| LAPTM5.12       | 3.74E-35 | -1.418090294 | 0.143 | 0.575 | 8.60E-31 | 15 |
| ELF1.12         | 4.45E-35 | -1.683710351 | 0.037 | 0.448 | 1.02E-30 | 15 |
| ARPC2.9         | 4.67E-35 | -1.424972347 | 0.224 | 0.645 | 1.07E-30 | 15 |
| NACA.7          | 4.78E-35 | 0.993724539  | 0.857 | 0.802 | 1.10E-30 | 15 |
| DUSP1.10        | 5.15E-35 | -1.414311222 | 0.502 | 0.798 | 1.18E-30 | 15 |
| PRDX2.8         | 6.05E-35 | 1.536557885  | 0.522 | 0.26  | 1.39E-30 | 15 |
| CD2.14          | 8.64E-35 | -2.15433069  | 0.053 | 0.464 | 1.98E-30 | 15 |
| ENO1.12         | 8.86E-35 | 1.226299829  | 0.776 | 0.59  | 2.04E-30 | 15 |
| COX5B.5         | 9.66E-35 | 1.411082013  | 0.71  | 0.543 | 2.22E-30 | 15 |
| DDX24.11        | 2.47E-34 | -1.322648917 | 0.045 | 0.464 | 5.67E-30 | 15 |
| CD53.9          | 2.60E-34 | -1.540071569 | 0.057 | 0.478 | 5.98E-30 | 15 |
| GZMA.14         | 4.74E-34 | -2.526904856 | 0.024 | 0.426 | 1.09E-29 | 15 |
| TRAC.15         | 5.20E-34 | -2.320755203 | 0.037 | 0.439 | 1.19E-29 | 15 |
| DUSP2.14        | 8.16E-34 | -2.309521924 | 0.033 | 0.438 | 1.87E-29 | 15 |
| RPS3.9          | 8.70E-34 | -0.778283333 | 0.853 | 0.92  | 2.00E-29 | 15 |
| TSC22D3.9       | 1.67E-33 | -1.33768639  | 0.457 | 0.786 | 3.83E-29 | 15 |
| RPLP0.10        | 2.20E-33 | 0.883804464  | 0.869 | 0.842 | 5.06E-29 | 15 |
| ARPC1B.7        | 2.91E-33 | -1.484363442 | 0.11  | 0.532 | 6.69E-29 | 15 |
| TMEM256.4       | 5.50E-33 | 1.589282651  | 0.502 | 0.249 | 1.26E-28 | 15 |
| MPC2.9          | 6.26E-33 | 1.598072314  | 0.51  | 0.26  | 1.44E-28 | 15 |
| UQCR10.2        | 7.64E-33 | 1.757364654  | 0.629 | 0.433 | 1.76E-28 | 15 |
| SOD1.8          | 9.17E-33 | 1.589601311  | 0.665 | 0.478 | 2.11E-28 | 15 |
| ANXA2.9         | 1.12E-32 | 1.350413694  | 0.641 | 0.389 | 2.56E-28 | 15 |
| NKG7.15         | 1.36E-32 | -2.802695313 | 0.041 | 0.434 | 3.12E-28 | 15 |
| TIMP1.13        | 1.47E-32 | 1.189497546  | 0.592 | 0.309 | 3.39E-28 | 15 |
| RPL36.12        | 1.49E-32 | 0.719931217  | 0.939 | 0.912 | 3.42E-28 | 15 |
| NPM1.8          | 1.71E-32 | 1.109725858  | 0.792 | 0.697 | 3.92E-28 | 15 |
| PPP2R5C.11      | 1.72E-32 | -1.822756788 | 0.012 | 0.397 | 3.94E-28 | 15 |
| PABPC1.8        | 1.93E-32 | -1.201345429 | 0.265 | 0.67  | 4.45E-28 | 15 |
| NDUFS5.5        | 2.77E-32 | 1.337822029  | 0.694 | 0.529 | 6.37E-28 | 15 |
| CD3E.14         | 5.32E-32 | -1.857507796 | 0.02  | 0.404 | 1.22E-27 | 15 |
| SLA.12          | 5.35E-32 | -1.692913375 | 0.02  | 0.406 | 1.23E-27 | 15 |
| POLR2I.3        | 5.80E-32 | 1.593009434  | 0.461 | 0.209 | 1.33E-27 | 15 |
| RPL38.7         | 7.19E-32 | 0.7689835    | 0.922 | 0.867 | 1.65E-27 | 15 |
| LSP1.14         | 7.99E-32 | -1.59602686  | 0.049 | 0.441 | 1.84E-27 | 15 |
| RP11-347P5.1.14 | 1.08E-31 | -1.999088175 | 0.004 | 0.382 | 2.49E-27 | 15 |
| DDX3X.11        | 1.49E-31 | -1.609883352 | 0.037 | 0.421 | 3.42E-27 | 15 |
| CD37.11         | 1.64E-31 | -1.317720362 | 0.065 | 0.47  | 3.78E-27 | 15 |
| STK17B.11       | 1.87E-31 | -1.617340872 | 0.024 | 0.407 | 4.30E-27 | 15 |

|             |          |              |       |       |          |    |
|-------------|----------|--------------|-------|-------|----------|----|
| LRRFIP1.6   | 2.05E-31 | -1.476924038 | 0.033 | 0.419 | 4.72E-27 | 15 |
| RBM39.8     | 2.30E-31 | -1.196304469 | 0.131 | 0.553 | 5.29E-27 | 15 |
| AKAP13.10   | 3.01E-31 | -1.370826483 | 0.045 | 0.439 | 6.91E-27 | 15 |
| PHPT1.7     | 4.34E-31 | 1.550557782  | 0.518 | 0.272 | 9.98E-27 | 15 |
| RPL17.10    | 4.83E-31 | 1.298975252  | 0.739 | 0.591 | 1.11E-26 | 15 |
| VAMP2.10    | 6.21E-31 | -1.280330357 | 0.073 | 0.472 | 1.43E-26 | 15 |
| ITGB1.8     | 7.44E-31 | -1.465682677 | 0.078 | 0.471 | 1.71E-26 | 15 |
| RPS12.4     | 2.01E-30 | -0.74334036  | 0.816 | 0.94  | 4.62E-26 | 15 |
| HLA-DRB5.13 | 3.47E-30 | -2.755847326 | 0.012 | 0.38  | 7.97E-26 | 15 |
| CCL4.15     | 4.60E-30 | -2.965678608 | 0.073 | 0.446 | 1.06E-25 | 15 |
| CD48.13     | 4.62E-30 | -1.539602967 | 0.016 | 0.381 | 1.06E-25 | 15 |
| RPL22.7     | 5.14E-30 | 0.912538348  | 0.853 | 0.81  | 1.18E-25 | 15 |
| CLIC4.2     | 6.05E-30 | 1.455674569  | 0.286 | 0.089 | 1.39E-25 | 15 |
| CCNL1.9     | 6.17E-30 | -1.22046069  | 0.029 | 0.405 | 1.42E-25 | 15 |
| POLR2J3.8   | 7.49E-30 | -1.495042188 | 0.029 | 0.401 | 1.72E-25 | 15 |
| CELF2.11    | 7.55E-30 | -1.194316269 | 0.049 | 0.433 | 1.74E-25 | 15 |
| FUS.10      | 9.06E-30 | -1.367740507 | 0.086 | 0.476 | 2.08E-25 | 15 |
| COX6A1.4    | 1.19E-29 | 1.416556371  | 0.665 | 0.516 | 2.74E-25 | 15 |
| IFI16.5     | 1.20E-29 | -1.232672109 | 0.094 | 0.488 | 2.76E-25 | 15 |
| ITGB2.12    | 1.44E-29 | -1.484770332 | 0.045 | 0.422 | 3.31E-25 | 15 |
| CFLAR.10    | 1.58E-29 | -1.350742527 | 0.049 | 0.429 | 3.63E-25 | 15 |
| RAC2.14     | 1.60E-29 | -1.598246345 | 0.016 | 0.379 | 3.68E-25 | 15 |
| PRPF38B.12  | 2.26E-29 | -1.337163997 | 0.061 | 0.442 | 5.20E-25 | 15 |
| FOSB.6      | 3.28E-29 | -1.628507132 | 0.057 | 0.432 | 7.53E-25 | 15 |
| IL2RG.15    | 3.72E-29 | -1.645140247 | 0.02  | 0.379 | 8.56E-25 | 15 |
| DYNLL1.7    | 3.80E-29 | 1.282832834  | 0.62  | 0.405 | 8.74E-25 | 15 |
| FNBP1.13    | 6.43E-29 | -1.448206183 | 0.016 | 0.374 | 1.48E-24 | 15 |
| ARGLU1.9    | 6.70E-29 | -1.144869287 | 0.061 | 0.44  | 1.54E-24 | 15 |
| JAK1.9      | 1.31E-28 | -1.374119789 | 0.037 | 0.402 | 3.00E-24 | 15 |
| AAK1.14     | 1.73E-28 | -1.44058492  | 0.02  | 0.377 | 3.97E-24 | 15 |
| NAA38.7     | 3.00E-28 | 1.535701599  | 0.514 | 0.282 | 6.89E-24 | 15 |
| ARL6IP5.10  | 4.10E-28 | -1.231212446 | 0.086 | 0.464 | 9.43E-24 | 15 |
| ID2.10      | 4.14E-28 | -1.57584934  | 0.204 | 0.57  | 9.52E-24 | 15 |
| RNF213.10   | 4.38E-28 | -1.246447637 | 0.033 | 0.394 | 1.01E-23 | 15 |
| IER2.7      | 6.63E-28 | -1.598635549 | 0.045 | 0.407 | 1.52E-23 | 15 |
| SEC61G.8    | 1.07E-27 | 1.387794897  | 0.62  | 0.434 | 2.47E-23 | 15 |
| HIST1H1C.1  | 1.29E-27 | 1.738498269  | 0.339 | 0.128 | 2.95E-23 | 15 |
| ANKRD12.8   | 1.41E-27 | -1.322135726 | 0.037 | 0.395 | 3.24E-23 | 15 |
| GPSM3.10    | 1.62E-27 | -1.289950383 | 0.037 | 0.396 | 3.73E-23 | 15 |
| COX6C.4     | 2.01E-27 | 1.371339486  | 0.694 | 0.565 | 4.62E-23 | 15 |
| LCP1.12     | 2.41E-27 | -1.193911779 | 0.049 | 0.41  | 5.53E-23 | 15 |
| IDS.10      | 2.75E-27 | -1.498186156 | 0.037 | 0.379 | 6.32E-23 | 15 |
| RPS3A.5     | 2.92E-27 | 0.621159678  | 0.951 | 0.929 | 6.71E-23 | 15 |
| TRBC2.14    | 3.60E-27 | -1.732088859 | 0.033 | 0.383 | 8.28E-23 | 15 |
| COTL1.9     | 3.71E-27 | -1.621273945 | 0.086 | 0.44  | 8.52E-23 | 15 |
| PRRC2C.8    | 5.41E-27 | -1.158413781 | 0.078 | 0.44  | 1.24E-22 | 15 |
| PIK3IP1.14  | 6.13E-27 | -1.510958208 | 0.02  | 0.364 | 1.41E-22 | 15 |
| CST7.13     | 6.88E-27 | -1.843345868 | 0.049 | 0.395 | 1.58E-22 | 15 |
| NDUFA2.3    | 6.98E-27 | 1.450557223  | 0.535 | 0.32  | 1.60E-22 | 15 |
| WIPF1.13    | 1.09E-26 | -1.37898129  | 0.012 | 0.349 | 2.52E-22 | 15 |
| KMT2E.12    | 1.91E-26 | -1.187262604 | 0.057 | 0.41  | 4.38E-22 | 15 |
| RPL15.3     | 2.43E-26 | -0.636076856 | 0.8   | 0.909 | 5.59E-22 | 15 |
| TXNDC17     | 2.51E-26 | 1.494835629  | 0.396 | 0.179 | 5.76E-22 | 15 |
| PDCD5.3     | 2.76E-26 | 1.56672124   | 0.4   | 0.181 | 6.35E-22 | 15 |
| UBR4.1      | 3.35E-26 | 1.235165157  | 0.29  | 0.099 | 7.69E-22 | 15 |
| MT-ND5.9    | 3.72E-26 | -1.041236932 | 0.241 | 0.617 | 8.55E-22 | 15 |
| ATP5C1.3    | 4.14E-26 | 1.465306604  | 0.522 | 0.316 | 9.51E-22 | 15 |
| MYL6.6      | 6.41E-26 | 0.807831467  | 0.845 | 0.796 | 1.47E-21 | 15 |

|             |          |              |       |       |          |    |
|-------------|----------|--------------|-------|-------|----------|----|
| RPS8.8      | 6.56E-26 | 0.55725977   | 0.918 | 0.918 | 1.51E-21 | 15 |
| RSRP1.9     | 8.14E-26 | -1.170300331 | 0.065 | 0.419 | 1.87E-21 | 15 |
| COX7B.3     | 9.28E-26 | 1.360102466  | 0.641 | 0.467 | 2.13E-21 | 15 |
| GZMK.15     | 1.06E-25 | -2.649171038 | 0.041 | 0.371 | 2.44E-21 | 15 |
| NKTR.10     | 1.32E-25 | -1.151869738 | 0.02  | 0.352 | 3.02E-21 | 15 |
| EVI2B.9     | 1.55E-25 | -1.421997407 | 0.016 | 0.341 | 3.56E-21 | 15 |
| ATRX.9      | 1.68E-25 | -1.007091053 | 0.045 | 0.393 | 3.85E-21 | 15 |
| HSBP1.6     | 2.38E-25 | 1.516245416  | 0.453 | 0.235 | 5.47E-21 | 15 |
| ARF6.8      | 4.15E-25 | -1.305718878 | 0.049 | 0.385 | 9.53E-21 | 15 |
| LINC00493.3 | 4.39E-25 | 1.48974992   | 0.482 | 0.271 | 1.01E-20 | 15 |
| STK17A.13   | 4.54E-25 | -1.387796889 | 0.037 | 0.372 | 1.04E-20 | 15 |
| NGFRAP1.2   | 5.42E-25 | 1.138400665  | 0.306 | 0.109 | 1.25E-20 | 15 |
| ETS1.13     | 6.87E-25 | -1.535501462 | 0.024 | 0.344 | 1.58E-20 | 15 |
| MBNL1.8     | 7.55E-25 | -1.052243671 | 0.033 | 0.361 | 1.73E-20 | 15 |
| PRKCDBP.2   | 1.39E-24 | 0.96292471   | 0.257 | 0.081 | 3.20E-20 | 15 |
| DDX17.8     | 1.59E-24 | -1.052582647 | 0.061 | 0.405 | 3.66E-20 | 15 |
| C12orf75.3  | 2.45E-24 | 1.253173157  | 0.367 | 0.153 | 5.63E-20 | 15 |
| ROCK1.8     | 2.49E-24 | -1.18966831  | 0.02  | 0.337 | 5.73E-20 | 15 |
| NDUFA7      | 2.54E-24 | 1.251517783  | 0.322 | 0.128 | 5.85E-20 | 15 |
| HLA-F.10    | 2.58E-24 | -1.070287026 | 0.098 | 0.444 | 5.93E-20 | 15 |
| WSB1.6      | 2.84E-24 | -1.03224869  | 0.037 | 0.366 | 6.54E-20 | 15 |
| PNRC1.8     | 3.08E-24 | -0.868031689 | 0.29  | 0.64  | 7.07E-20 | 15 |
| KIAA1551.11 | 3.32E-24 | -1.298478101 | 0.024 | 0.341 | 7.63E-20 | 15 |
| TCF25.4     | 3.34E-24 | -0.95553052  | 0.073 | 0.42  | 7.67E-20 | 15 |
| UQCRB.5     | 4.16E-24 | 0.989127733  | 0.771 | 0.744 | 9.56E-20 | 15 |
| ARID4B.11   | 4.17E-24 | -0.996098645 | 0.024 | 0.346 | 9.59E-20 | 15 |
| HNRNPA2B1.6 | 4.30E-24 | -0.923475679 | 0.269 | 0.634 | 9.89E-20 | 15 |
| RNF181.6    | 5.60E-24 | 1.455740626  | 0.478 | 0.266 | 1.29E-19 | 15 |
| HERPUD1.10  | 5.70E-24 | -1.283390183 | 0.151 | 0.498 | 1.31E-19 | 15 |
| AKAP9.7     | 6.81E-24 | -1.14946179  | 0.029 | 0.347 | 1.56E-19 | 15 |
| UQCRH.4     | 8.83E-24 | -1.1727303   | 0.114 | 0.47  | 2.03E-19 | 15 |
| PPP1R15A.8  | 9.94E-24 | -1.217938958 | 0.073 | 0.409 | 2.29E-19 | 15 |
| SCAF11.6    | 1.09E-23 | -0.942721224 | 0.045 | 0.366 | 2.51E-19 | 15 |
| MINOS1.4    | 1.16E-23 | 1.449330141  | 0.559 | 0.382 | 2.67E-19 | 15 |
| RBM25.7     | 1.24E-23 | -1.151996166 | 0.045 | 0.365 | 2.85E-19 | 15 |
| STAT3.10    | 1.28E-23 | -1.268065455 | 0.016 | 0.323 | 2.93E-19 | 15 |
| IRF1.10     | 3.05E-23 | -1.524922833 | 0.016 | 0.316 | 7.00E-19 | 15 |
| HEBP2       | 3.55E-23 | 1.356575315  | 0.31  | 0.121 | 8.15E-19 | 15 |
| HNRNPA0.3   | 3.67E-23 | -1.04577255  | 0.078 | 0.409 | 8.43E-19 | 15 |
| ITM2A.14    | 4.76E-23 | -1.59322538  | 0.012 | 0.316 | 1.09E-18 | 15 |
| CLK1.10     | 6.00E-23 | -1.130192983 | 0.045 | 0.362 | 1.38E-18 | 15 |
| HMGB2.10    | 6.68E-23 | -1.199196208 | 0.135 | 0.482 | 1.54E-18 | 15 |
| SMCHD1.6    | 7.21E-23 | -1.188114902 | 0.024 | 0.333 | 1.66E-18 | 15 |
| PCSK7.13    | 8.38E-23 | -1.24462975  | 0.02  | 0.326 | 1.93E-18 | 15 |
| SAMSN1.9    | 9.95E-23 | -1.372121486 | 0.024 | 0.328 | 2.29E-18 | 15 |
| ADI1        | 1.62E-22 | 1.382070685  | 0.351 | 0.158 | 3.72E-18 | 15 |
| CETN2.1     | 1.96E-22 | 1.258067264  | 0.261 | 0.092 | 4.49E-18 | 15 |
| MYH9.9      | 2.71E-22 | -1.176028998 | 0.02  | 0.316 | 6.23E-18 | 15 |
| CD3G.14     | 3.03E-22 | -1.524289313 | 0.008 | 0.298 | 6.95E-18 | 15 |
| CCND3.6     | 3.39E-22 | -1.053742883 | 0.049 | 0.365 | 7.79E-18 | 15 |
| CTSS.12     | 3.46E-22 | -1.477158846 | 0.057 | 0.368 | 7.95E-18 | 15 |
| HNRNPA3.3   | 3.59E-22 | -1.072070031 | 0.135 | 0.469 | 8.25E-18 | 15 |
| TRBC1.14    | 3.66E-22 | -1.854248359 | 0.053 | 0.358 | 8.40E-18 | 15 |
| FAM162A.3   | 3.72E-22 | 1.349159063  | 0.384 | 0.182 | 8.56E-18 | 15 |
| SRSF2.10    | 4.04E-22 | -0.937705495 | 0.098 | 0.429 | 9.28E-18 | 15 |
| JUND.8      | 4.56E-22 | -1.286472359 | 0.02  | 0.315 | 1.05E-17 | 15 |
| PPP1R2.8    | 6.57E-22 | -1.218975173 | 0.045 | 0.348 | 1.51E-17 | 15 |
| LTB.14      | 6.72E-22 | -1.892762758 | 0.02  | 0.306 | 1.54E-17 | 15 |

|             |          |              |       |       |          |    |
|-------------|----------|--------------|-------|-------|----------|----|
| WASF2.6     | 7.76E-22 | -1.164637545 | 0.037 | 0.335 | 1.78E-17 | 15 |
| GIMAP4.10   | 9.32E-22 | -1.117635262 | 0.041 | 0.344 | 2.14E-17 | 15 |
| ACAP1.15    | 9.81E-22 | -1.311933341 | 0.041 | 0.338 | 2.25E-17 | 15 |
| MZT2A.10    | 9.89E-22 | 1.299733102  | 0.469 | 0.267 | 2.27E-17 | 15 |
| TRA2B.5     | 1.07E-21 | -1.037390361 | 0.065 | 0.374 | 2.45E-17 | 15 |
| BTG2.9      | 1.14E-21 | -1.346737404 | 0.057 | 0.363 | 2.61E-17 | 15 |
| SYNE2.14    | 1.55E-21 | -1.106084386 | 0.033 | 0.338 | 3.55E-17 | 15 |
| TNRC6B.7    | 1.71E-21 | -1.27385766  | 0.033 | 0.322 | 3.92E-17 | 15 |
| LCK.15      | 1.88E-21 | -1.353586972 | 0.012 | 0.292 | 4.32E-17 | 15 |
| RSRC2.8     | 1.99E-21 | -1.13387658  | 0.073 | 0.383 | 4.56E-17 | 15 |
| ADGRE5.12   | 2.05E-21 | -1.28850157  | 0.016 | 0.304 | 4.70E-17 | 15 |
| CYBA.10     | 2.34E-21 | -0.98079532  | 0.396 | 0.692 | 5.37E-17 | 15 |
| SEPT7.7     | 2.58E-21 | -0.944129578 | 0.18  | 0.519 | 5.92E-17 | 15 |
| SP100.10    | 2.73E-21 | -0.765285716 | 0.086 | 0.404 | 6.28E-17 | 15 |
| SRRM2.5     | 2.77E-21 | -1.013802831 | 0.049 | 0.346 | 6.37E-17 | 15 |
| NCOR1.9     | 3.05E-21 | -1.028643641 | 0.049 | 0.353 | 7.02E-17 | 15 |
| ACTR2.7     | 3.46E-21 | -0.865326208 | 0.061 | 0.373 | 7.95E-17 | 15 |
| RGCC.13     | 3.62E-21 | -1.99166262  | 0.029 | 0.312 | 8.33E-17 | 15 |
| RPS27.9     | 3.70E-21 | -0.555660131 | 0.955 | 0.976 | 8.51E-17 | 15 |
| PSMA3-AS1.9 | 3.91E-21 | -1.18478753  | 0.004 | 0.28  | 8.98E-17 | 15 |
| NDUFA1.3    | 4.41E-21 | 1.299681785  | 0.612 | 0.482 | 1.01E-16 | 15 |
| DNPH1.1     | 5.51E-21 | 1.145266258  | 0.318 | 0.135 | 1.27E-16 | 15 |
| GCC2.9      | 5.91E-21 | -0.775895885 | 0.061 | 0.365 | 1.36E-16 | 15 |
| NCL.5       | 6.22E-21 | -0.840801332 | 0.118 | 0.437 | 1.43E-16 | 15 |
| IL7R.13     | 8.31E-21 | -2.308628798 | 0.029 | 0.308 | 1.91E-16 | 15 |
| LAMTOR5.8   | 1.39E-20 | 1.321874441  | 0.522 | 0.342 | 3.20E-16 | 15 |
| TUBA1A.4    | 1.52E-20 | -1.235030505 | 0.049 | 0.343 | 3.49E-16 | 15 |
| REL.10      | 1.59E-20 | -1.154411718 | 0.041 | 0.327 | 3.65E-16 | 15 |
| BCLAF1.8    | 1.60E-20 | -1.086804764 | 0.049 | 0.341 | 3.67E-16 | 15 |
| NDUFB10.6   | 2.41E-20 | 1.417188247  | 0.518 | 0.341 | 5.53E-16 | 15 |
| CLEC2B.8    | 2.64E-20 | -1.179474506 | 0.09  | 0.383 | 6.06E-16 | 15 |
| KIF5B.3     | 4.36E-20 | -0.995477658 | 0.016 | 0.289 | 1.00E-15 | 15 |
| RPL36A.9    | 4.52E-20 | 0.746383043  | 0.829 | 0.801 | 1.04E-15 | 15 |
| RPL8.5      | 4.67E-20 | 0.548567737  | 0.882 | 0.882 | 1.07E-15 | 15 |
| LIMD2.14    | 4.74E-20 | -1.075580132 | 0.033 | 0.316 | 1.09E-15 | 15 |
| CLEC2D.14   | 4.79E-20 | -1.3176082   | 0.033 | 0.311 | 1.10E-15 | 15 |
| MTDH.5      | 4.90E-20 | -0.765527618 | 0.082 | 0.393 | 1.13E-15 | 15 |
| CD7.12      | 5.50E-20 | -1.462931758 | 0.029 | 0.305 | 1.26E-15 | 15 |
| MSN.8       | 5.90E-20 | -0.979045905 | 0.078 | 0.371 | 1.36E-15 | 15 |
| XRCC5.4     | 6.80E-20 | -0.759565633 | 0.041 | 0.329 | 1.56E-15 | 15 |
| SLC25A6.7   | 7.39E-20 | -0.977172842 | 0.359 | 0.66  | 1.70E-15 | 15 |
| CD99.10     | 1.05E-19 | -1.024697625 | 0.171 | 0.475 | 2.42E-15 | 15 |
| ATP5G3.3    | 1.10E-19 | 1.371538245  | 0.543 | 0.405 | 2.53E-15 | 15 |
| CFAP36.1    | 1.26E-19 | 1.042602023  | 0.253 | 0.093 | 2.89E-15 | 15 |
| SEPT6.11    | 1.31E-19 | -1.044048284 | 0.016 | 0.282 | 3.00E-15 | 15 |
| POLR2L.6    | 1.35E-19 | 1.258069912  | 0.571 | 0.434 | 3.10E-15 | 15 |
| EVI2A.11    | 1.36E-19 | -1.071930523 | 0.016 | 0.285 | 3.13E-15 | 15 |
| SH3KBP1.11  | 1.40E-19 | -1.023068746 | 0.041 | 0.313 | 3.23E-15 | 15 |
| FOXP1.9     | 1.63E-19 | -1.1977289   | 0.004 | 0.262 | 3.74E-15 | 15 |
| TERF2IP.8   | 1.64E-19 | -0.997882318 | 0.078 | 0.37  | 3.76E-15 | 15 |
| YWHAZ.10    | 1.66E-19 | -0.970553624 | 0.188 | 0.499 | 3.82E-15 | 15 |
| LUC7L3.8    | 1.67E-19 | -1.039971561 | 0.041 | 0.316 | 3.83E-15 | 15 |
| PRDM1.10    | 1.87E-19 | -1.388121913 | 0.029 | 0.296 | 4.29E-15 | 15 |
| VDAC1.6     | 1.87E-19 | 1.349698256  | 0.465 | 0.274 | 4.29E-15 | 15 |
| MYO1F.10    | 2.10E-19 | -1.019761515 | 0.012 | 0.276 | 4.83E-15 | 15 |
| PDCD4.6     | 2.35E-19 | -0.982064335 | 0.033 | 0.309 | 5.39E-15 | 15 |
| CFL1.4      | 2.58E-19 | -0.760922115 | 0.465 | 0.752 | 5.93E-15 | 15 |
| FKBP5.9     | 2.76E-19 | -1.074368895 | 0.106 | 0.401 | 6.34E-15 | 15 |

|             |          |              |       |       |          |    |
|-------------|----------|--------------|-------|-------|----------|----|
| ATPIF1.3    | 3.03E-19 | 1.23720619   | 0.567 | 0.418 | 6.97E-15 | 15 |
| RBPJ.9      | 3.16E-19 | -1.065258041 | 0.049 | 0.326 | 7.26E-15 | 15 |
| SYTL3.13    | 3.25E-19 | -1.317412999 | 0.02  | 0.282 | 7.47E-15 | 15 |
| FAM133B.5   | 3.82E-19 | -1.060711205 | 0.037 | 0.307 | 8.77E-15 | 15 |
| RPL7.8      | 4.18E-19 | 0.538046803  | 0.918 | 0.92  | 9.60E-15 | 15 |
| PEBP1.11    | 4.22E-19 | 1.111170046  | 0.559 | 0.387 | 9.70E-15 | 15 |
| FKBP2.2     | 4.50E-19 | 1.300082621  | 0.42  | 0.234 | 1.03E-14 | 15 |
| SF1.8       | 4.91E-19 | -0.818013572 | 0.041 | 0.315 | 1.13E-14 | 15 |
| FYN.10      | 5.29E-19 | -1.224439111 | 0.012 | 0.27  | 1.22E-14 | 15 |
| CRIP1.11    | 5.30E-19 | -1.283532774 | 0.029 | 0.298 | 1.22E-14 | 15 |
| MPHOSPH8.6  | 5.71E-19 | -0.983242845 | 0.037 | 0.307 | 1.31E-14 | 15 |
| TRAF3IP3.14 | 7.10E-19 | -1.124285415 | 0.008 | 0.26  | 1.63E-14 | 15 |
| SERF2.5     | 7.77E-19 | 0.726729657  | 0.812 | 0.818 | 1.79E-14 | 15 |
| USP15.8     | 8.15E-19 | -0.980295776 | 0.012 | 0.267 | 1.87E-14 | 15 |
| ZFP36L1.10  | 8.33E-19 | -0.938354435 | 0.086 | 0.371 | 1.92E-14 | 15 |
| GLIPR1.11   | 8.39E-19 | -1.024118577 | 0.037 | 0.304 | 1.93E-14 | 15 |
| PNN.7       | 9.24E-19 | -1.002075795 | 0.041 | 0.309 | 2.12E-14 | 15 |
| SYTL2.2     | 9.55E-19 | 1.114167439  | 0.257 | 0.097 | 2.19E-14 | 15 |
| CDC42SE2.8  | 1.00E-18 | -1.087567982 | 0.049 | 0.32  | 2.30E-14 | 15 |
| MRPL51.5    | 1.07E-18 | 1.19127015   | 0.449 | 0.262 | 2.45E-14 | 15 |
| EMB.11      | 1.28E-18 | -0.98968796  | 0.016 | 0.274 | 2.95E-14 | 15 |
| KTN1.8      | 1.40E-18 | -0.843533657 | 0.094 | 0.388 | 3.23E-14 | 15 |
| IQGAP1.7    | 1.66E-18 | -0.818428732 | 0.065 | 0.343 | 3.82E-14 | 15 |
| NR4A2.11    | 1.86E-18 | -1.294300378 | 0.024 | 0.281 | 4.27E-14 | 15 |
| IL10RA.11   | 1.97E-18 | -1.034340799 | 0.012 | 0.263 | 4.53E-14 | 15 |
| GLTSCR2.7   | 2.04E-18 | -0.779827829 | 0.269 | 0.593 | 4.69E-14 | 15 |
| BNIP3L.3    | 2.04E-18 | 1.180706392  | 0.42  | 0.228 | 4.70E-14 | 15 |
| TBCA.7      | 2.09E-18 | 1.324637095  | 0.547 | 0.4   | 4.81E-14 | 15 |
| HCLS1.9     | 2.44E-18 | -0.76383885  | 0.053 | 0.327 | 5.61E-14 | 15 |
| SLC2A3.7    | 2.49E-18 | -1.297827184 | 0.016 | 0.269 | 5.73E-14 | 15 |
| ANKRD44.10  | 2.66E-18 | -0.948268388 | 0.012 | 0.263 | 6.12E-14 | 15 |
| SRSF11.5    | 2.75E-18 | -0.80465842  | 0.098 | 0.381 | 6.31E-14 | 15 |
| THRAP3.3    | 2.78E-18 | -0.792951983 | 0.033 | 0.296 | 6.40E-14 | 15 |
| ARHGEF1.11  | 2.94E-18 | -0.929659444 | 0.016 | 0.267 | 6.76E-14 | 15 |
| NDUFA4.5    | 3.02E-18 | 1.064518113  | 0.637 | 0.538 | 6.93E-14 | 15 |
| RPL24.8     | 3.14E-18 | 0.63604578   | 0.837 | 0.853 | 7.21E-14 | 15 |
| FXYD5.8     | 3.42E-18 | -0.805128027 | 0.18  | 0.486 | 7.86E-14 | 15 |
| PPP1R12A.6  | 3.57E-18 | -0.894395234 | 0.024 | 0.284 | 8.20E-14 | 15 |
| RPL9.6      | 3.62E-18 | 0.517291369  | 0.914 | 0.901 | 8.33E-14 | 15 |
| BIN2.10     | 4.24E-18 | -1.105032918 | 0.008 | 0.254 | 9.73E-14 | 15 |
| TAOK3.8     | 5.19E-18 | -0.900330859 | 0.02  | 0.27  | 1.19E-13 | 15 |
| GNLY.13     | 5.43E-18 | -3.106321454 | 0.012 | 0.257 | 1.25E-13 | 15 |
| DOCK8.11    | 5.80E-18 | -0.93134355  | 0.037 | 0.296 | 1.33E-13 | 15 |
| HNRNPU.4    | 5.90E-18 | -0.818446365 | 0.098 | 0.379 | 1.36E-13 | 15 |
| MT-ND4L.8   | 6.06E-18 | -0.914176766 | 0.086 | 0.365 | 1.39E-13 | 15 |
| RCSD1.10    | 6.39E-18 | -0.91791668  | 0.008 | 0.254 | 1.47E-13 | 15 |
| ODF2L.9     | 6.62E-18 | -1.18838675  | 0.016 | 0.264 | 1.52E-13 | 15 |
| FAM49B.9    | 7.29E-18 | -0.990606987 | 0.073 | 0.345 | 1.68E-13 | 15 |
| EPC1.9      | 7.42E-18 | -1.005304527 | 0.024 | 0.274 | 1.70E-13 | 15 |
| BOLA3       | 7.89E-18 | 1.128691863  | 0.273 | 0.112 | 1.81E-13 | 15 |
| PRKCH.10    | 9.03E-18 | -1.008189782 | 0.012 | 0.258 | 2.08E-13 | 15 |
| SH3BGRL3.11 | 9.55E-18 | -0.852689583 | 0.388 | 0.687 | 2.19E-13 | 15 |
| ATP5O.7     | 1.06E-17 | 1.124986904  | 0.551 | 0.408 | 2.42E-13 | 15 |
| CD96.15     | 1.10E-17 | -1.198456005 | 0.012 | 0.253 | 2.52E-13 | 15 |
| PDLIM1.2    | 1.21E-17 | 0.791497786  | 0.29  | 0.117 | 2.78E-13 | 15 |
| RPA3.1      | 1.60E-17 | 1.144634833  | 0.359 | 0.183 | 3.68E-13 | 15 |
| GIMAP7.13   | 1.65E-17 | -0.930493834 | 0.033 | 0.289 | 3.79E-13 | 15 |
| AKNA.10     | 2.01E-17 | -1.001677981 | 0.02  | 0.265 | 4.61E-13 | 15 |

|             |          |              |       |       |          |    |
|-------------|----------|--------------|-------|-------|----------|----|
| PIK3R1.12   | 2.02E-17 | -1.019476445 | 0.049 | 0.313 | 4.64E-13 | 15 |
| CNN3.3      | 2.11E-17 | 0.517576324  | 0.273 | 0.105 | 4.85E-13 | 15 |
| RPS21.9     | 2.43E-17 | 0.62354139   | 0.841 | 0.862 | 5.58E-13 | 15 |
| MYCBP2.7    | 2.70E-17 | -0.930227686 | 0.02  | 0.262 | 6.20E-13 | 15 |
| EMP3.7      | 2.78E-17 | -0.911777373 | 0.114 | 0.395 | 6.39E-13 | 15 |
| ATM.8       | 4.38E-17 | -0.990935842 | 0.016 | 0.253 | 1.01E-12 | 15 |
| BTN3A2.8    | 5.00E-17 | -0.80484271  | 0.024 | 0.267 | 1.15E-12 | 15 |
| EIF4A2.8    | 5.21E-17 | -0.584467449 | 0.265 | 0.585 | 1.20E-12 | 15 |
| UCP2.11     | 9.44E-17 | -0.871099615 | 0.082 | 0.351 | 2.17E-12 | 15 |
| NHP2.1      | 1.00E-16 | 1.260551678  | 0.38  | 0.21  | 2.30E-12 | 15 |
| CREM.9      | 1.02E-16 | -1.230272403 | 0.041 | 0.284 | 2.36E-12 | 15 |
| SRRM1.4     | 1.08E-16 | -0.598357592 | 0.131 | 0.424 | 2.49E-12 | 15 |
| ANGPTL4.3   | 1.12E-16 | 0.833694446  | 0.355 | 0.164 | 2.58E-12 | 15 |
| LEPROTL1.7  | 1.16E-16 | -0.84934444  | 0.114 | 0.394 | 2.67E-12 | 15 |
| ISG20.11    | 1.24E-16 | -1.092016254 | 0.106 | 0.366 | 2.85E-12 | 15 |
| CHMP4A.2    | 1.34E-16 | -0.780218481 | 0.065 | 0.323 | 3.09E-12 | 15 |
| GLRX.8      | 1.57E-16 | 1.36807185   | 0.457 | 0.295 | 3.60E-12 | 15 |
| PSMB9.6     | 1.74E-16 | -0.726887088 | 0.188 | 0.489 | 4.00E-12 | 15 |
| PPIG.4      | 1.75E-16 | -0.642023017 | 0.061 | 0.325 | 4.02E-12 | 15 |
| EEF2.6      | 1.84E-16 | -0.594276194 | 0.388 | 0.69  | 4.22E-12 | 15 |
| SEPT9.8     | 2.17E-16 | -0.935095045 | 0.02  | 0.254 | 5.00E-12 | 15 |
| BRD2.6      | 2.29E-16 | -0.92410138  | 0.02  | 0.251 | 5.26E-12 | 15 |
| COX6B1.1    | 2.35E-16 | 0.98573352   | 0.653 | 0.572 | 5.40E-12 | 15 |
| YPEL5.10    | 2.62E-16 | -1.01466063  | 0.09  | 0.349 | 6.02E-12 | 15 |
| CAP1.5      | 3.11E-16 | -0.960869341 | 0.159 | 0.416 | 7.15E-12 | 15 |
| TLN1.4      | 3.63E-16 | -0.837093907 | 0.033 | 0.269 | 8.34E-12 | 15 |
| RPL23.7     | 3.84E-16 | 0.590319307  | 0.816 | 0.817 | 8.83E-12 | 15 |
| DBI.4       | 4.94E-16 | 1.298372694  | 0.551 | 0.421 | 1.14E-11 | 15 |
| ARPC4.6     | 4.99E-16 | -0.801154686 | 0.086 | 0.341 | 1.15E-11 | 15 |
| MACF1.9     | 5.32E-16 | -0.729333523 | 0.029 | 0.261 | 1.22E-11 | 15 |
| RPS11.8     | 5.40E-16 | 0.567375392  | 0.882 | 0.855 | 1.24E-11 | 15 |
| DDX6.8      | 5.72E-16 | -0.904310377 | 0.02  | 0.251 | 1.31E-11 | 15 |
| JMJD1C.6    | 6.34E-16 | -0.823000227 | 0.029 | 0.262 | 1.46E-11 | 15 |
| PFKP.1      | 6.72E-16 | 1.064453264  | 0.261 | 0.11  | 1.54E-11 | 15 |
| SF3B1.4     | 7.15E-16 | -0.693635013 | 0.073 | 0.33  | 1.64E-11 | 15 |
| DDX46.4     | 9.27E-16 | -0.762592092 | 0.065 | 0.319 | 2.13E-11 | 15 |
| CARHSP1.3   | 9.45E-16 | 1.04776621   | 0.376 | 0.203 | 2.17E-11 | 15 |
| NDUFB6      | 9.61E-16 | 1.343506842  | 0.355 | 0.192 | 2.21E-11 | 15 |
| MGST3.11    | 1.01E-15 | 1.07589037   | 0.465 | 0.304 | 2.32E-11 | 15 |
| CCNH.10     | 1.07E-15 | -0.88732624  | 0.049 | 0.288 | 2.45E-11 | 15 |
| RNF19A.12   | 1.12E-15 | -0.932337854 | 0.045 | 0.281 | 2.57E-11 | 15 |
| CD27.14     | 1.36E-15 | -1.205943821 | 0.037 | 0.272 | 3.11E-11 | 15 |
| APOBEC3G.12 | 1.45E-15 | -1.013425275 | 0.045 | 0.275 | 3.33E-11 | 15 |
| ATOX1.4     | 1.46E-15 | 1.035017473  | 0.392 | 0.221 | 3.36E-11 | 15 |
| TAPBP.7     | 1.49E-15 | -0.616546625 | 0.073 | 0.329 | 3.43E-11 | 15 |
| RGS10.9     | 1.60E-15 | -0.947511011 | 0.061 | 0.299 | 3.67E-11 | 15 |
| SMAP2.11    | 1.90E-15 | -0.785453503 | 0.057 | 0.302 | 4.36E-11 | 15 |
| MMP24-AS1.2 | 2.00E-15 | 1.180440016  | 0.331 | 0.169 | 4.60E-11 | 15 |
| HNRNPM.1    | 2.08E-15 | -0.765572718 | 0.069 | 0.323 | 4.79E-11 | 15 |
| TGOLN2.4    | 2.21E-15 | -0.66815284  | 0.037 | 0.265 | 5.07E-11 | 15 |
| RNPS1.5     | 3.32E-15 | -0.830070534 | 0.037 | 0.266 | 7.64E-11 | 15 |
| EIF5.2      | 3.76E-15 | -0.697548839 | 0.078 | 0.329 | 8.63E-11 | 15 |
| MGEA5.9     | 3.88E-15 | -0.762448958 | 0.041 | 0.269 | 8.91E-11 | 15 |
| DHX36.6     | 4.62E-15 | -0.748696144 | 0.041 | 0.269 | 1.06E-10 | 15 |
| WNK1.8      | 4.89E-15 | -0.843096761 | 0.033 | 0.253 | 1.12E-10 | 15 |
| TPR.6       | 4.90E-15 | -0.699792267 | 0.065 | 0.312 | 1.13E-10 | 15 |
| BLVRB.3     | 5.50E-15 | 0.984547781  | 0.318 | 0.157 | 1.26E-10 | 15 |
| UBXN1.3     | 5.95E-15 | -0.614957234 | 0.127 | 0.396 | 1.37E-10 | 15 |



|             |          |              |       |       |          |    |
|-------------|----------|--------------|-------|-------|----------|----|
| UBB.6       | 6.58E-15 | 0.716238553  | 0.751 | 0.719 | 1.51E-10 | 15 |
| DNAJB6.3    | 7.30E-15 | -0.806949668 | 0.094 | 0.344 | 1.68E-10 | 15 |
| BUB3.10     | 7.78E-15 | -0.766869234 | 0.049 | 0.275 | 1.79E-10 | 15 |
| PAPOLA.2    | 7.82E-15 | -0.754000453 | 0.078 | 0.317 | 1.80E-10 | 15 |
| VIM.12      | 9.25E-15 | 0.703293314  | 0.853 | 0.77  | 2.12E-10 | 15 |
| DNAJA1.5    | 9.26E-15 | -0.665764414 | 0.086 | 0.336 | 2.13E-10 | 15 |
| RGS2.14     | 1.04E-14 | -1.286271875 | 0.094 | 0.339 | 2.38E-10 | 15 |
| CFDP1.2     | 1.04E-14 | 1.221916172  | 0.347 | 0.189 | 2.39E-10 | 15 |
| RHOG.8      | 1.17E-14 | -0.664525297 | 0.041 | 0.268 | 2.70E-10 | 15 |
| SLTM.5      | 1.20E-14 | -0.880286647 | 0.057 | 0.284 | 2.75E-10 | 15 |
| TAF7.7      | 1.27E-14 | -0.752849369 | 0.082 | 0.325 | 2.91E-10 | 15 |
| MYL12A.6    | 1.37E-14 | -0.751543874 | 0.433 | 0.694 | 3.15E-10 | 15 |
| WDR1.2      | 1.40E-14 | -0.670830494 | 0.045 | 0.271 | 3.22E-10 | 15 |
| GNAI2.10    | 1.47E-14 | -0.748635023 | 0.041 | 0.264 | 3.38E-10 | 15 |
| ACTR3.5     | 1.59E-14 | -0.592639677 | 0.131 | 0.386 | 3.65E-10 | 15 |
| HLA-DPB1.12 | 1.93E-14 | -1.708983854 | 0.429 | 0.636 | 4.44E-10 | 15 |
| MRPL40.1    | 2.39E-14 | 0.988423273  | 0.278 | 0.131 | 5.49E-10 | 15 |
| ZFAND5.9    | 2.64E-14 | -0.980858663 | 0.078 | 0.311 | 6.08E-10 | 15 |
| CKLF.8      | 2.97E-14 | -0.776838899 | 0.114 | 0.368 | 6.82E-10 | 15 |
| CTSC.12     | 3.50E-14 | -0.71234382  | 0.102 | 0.351 | 8.03E-10 | 15 |
| HNRNPH1.5   | 3.63E-14 | -0.711303263 | 0.086 | 0.324 | 8.33E-10 | 15 |
| ICAM3.13    | 3.81E-14 | -0.736640602 | 0.053 | 0.276 | 8.75E-10 | 15 |
| RTF1.2      | 4.06E-14 | -0.681142174 | 0.057 | 0.281 | 9.33E-10 | 15 |
| CCDC85B.5   | 4.09E-14 | -0.686699984 | 0.037 | 0.257 | 9.40E-10 | 15 |
| ATP5G1.2    | 4.12E-14 | 1.241605391  | 0.392 | 0.241 | 9.46E-10 | 15 |
| ALOX5AP.11  | 5.19E-14 | -1.287130278 | 0.11  | 0.333 | 1.19E-09 | 15 |
| NDUFB9.2    | 5.40E-14 | 1.077193702  | 0.473 | 0.33  | 1.24E-09 | 15 |
| PRDX6.7     | 5.95E-14 | 1.158729937  | 0.465 | 0.323 | 1.37E-09 | 15 |
| DPY30.2     | 5.99E-14 | 1.172672397  | 0.367 | 0.212 | 1.38E-09 | 15 |
| PRKAR1A.2   | 6.54E-14 | -0.70294801  | 0.045 | 0.265 | 1.50E-09 | 15 |
| RAB13.4     | 6.74E-14 | 0.846546818  | 0.286 | 0.134 | 1.55E-09 | 15 |
| GABPB1.8    | 7.41E-14 | -0.645109434 | 0.061 | 0.284 | 1.70E-09 | 15 |
| RABAC1.6    | 8.58E-14 | -0.698623072 | 0.122 | 0.361 | 1.97E-09 | 15 |
| OST4.4      | 9.22E-14 | 0.912328474  | 0.673 | 0.66  | 2.12E-09 | 15 |
| UQCR11.3    | 1.03E-13 | 0.882099962  | 0.649 | 0.609 | 2.36E-09 | 15 |
| ANXA6.11    | 1.03E-13 | -0.904763684 | 0.045 | 0.253 | 2.37E-09 | 15 |
| NFE2L2.10   | 1.03E-13 | -0.826755057 | 0.049 | 0.267 | 2.37E-09 | 15 |
| LAMP1.4     | 1.20E-13 | -0.604427531 | 0.078 | 0.308 | 2.77E-09 | 15 |
| HSPA8.8     | 1.69E-13 | -0.748968764 | 0.29  | 0.559 | 3.89E-09 | 15 |
| PCM1.6      | 1.72E-13 | -0.737177124 | 0.045 | 0.256 | 3.96E-09 | 15 |
| FKBP8.1     | 1.98E-13 | -0.597151333 | 0.094 | 0.336 | 4.55E-09 | 15 |
| SELM.3      | 2.09E-13 | 1.202217099  | 0.335 | 0.181 | 4.81E-09 | 15 |
| RNF149.11   | 2.15E-13 | -0.903484125 | 0.061 | 0.273 | 4.93E-09 | 15 |
| FUNDC2.3    | 2.18E-13 | 0.960716612  | 0.335 | 0.187 | 5.00E-09 | 15 |
| HNRNPR.3    | 2.38E-13 | -0.656283992 | 0.061 | 0.28  | 5.46E-09 | 15 |
| YWHAB.7     | 2.48E-13 | -0.803183394 | 0.245 | 0.491 | 5.69E-09 | 15 |
| DNAJB1.11   | 2.54E-13 | -0.746848262 | 0.171 | 0.424 | 5.83E-09 | 15 |
| RAP1A.7     | 2.85E-13 | -0.623095942 | 0.114 | 0.354 | 6.56E-09 | 15 |
| MGST2.3     | 3.51E-13 | 1.013282969  | 0.31  | 0.163 | 8.07E-09 | 15 |
| SF3B2.6     | 4.22E-13 | -0.72386776  | 0.094 | 0.32  | 9.70E-09 | 15 |
| SFPQ.6      | 4.38E-13 | -0.607673806 | 0.086 | 0.315 | 1.01E-08 | 15 |
| CD164.4     | 4.50E-13 | -0.698926112 | 0.106 | 0.335 | 1.03E-08 | 15 |
| SELT.3      | 4.87E-13 | -0.73410383  | 0.086 | 0.314 | 1.12E-08 | 15 |
| ATP6AP2.7   | 5.66E-13 | -0.700187509 | 0.086 | 0.311 | 1.30E-08 | 15 |
| S100A9.13   | 7.33E-13 | -2.542729287 | 0.053 | 0.255 | 1.68E-08 | 15 |
| TRIM22.7    | 7.35E-13 | -0.587394856 | 0.045 | 0.252 | 1.69E-08 | 15 |
| VMP1.9      | 7.57E-13 | -0.746603852 | 0.098 | 0.324 | 1.74E-08 | 15 |
| RSF1.5      | 8.07E-13 | -0.651377285 | 0.053 | 0.26  | 1.86E-08 | 15 |

|             |          |              |       |       |          |    |
|-------------|----------|--------------|-------|-------|----------|----|
| GNG5.9      | 8.46E-13 | 1.09699782   | 0.482 | 0.349 | 1.94E-08 | 15 |
| ATP1B3.11   | 9.47E-13 | -0.662130485 | 0.061 | 0.272 | 2.18E-08 | 15 |
| ARPC5.7     | 1.17E-12 | -0.555521694 | 0.188 | 0.44  | 2.69E-08 | 15 |
| RPL36AL.5   | 1.46E-12 | -0.618219676 | 0.465 | 0.716 | 3.37E-08 | 15 |
| NDUFB7.3    | 1.57E-12 | 1.008721831  | 0.465 | 0.333 | 3.61E-08 | 15 |
| TCEB2.5     | 1.64E-12 | 0.901203775  | 0.612 | 0.57  | 3.77E-08 | 15 |
| CALM1.7     | 1.85E-12 | -0.658290352 | 0.331 | 0.601 | 4.24E-08 | 15 |
| CASP4.6     | 1.97E-12 | -0.53555729  | 0.078 | 0.294 | 4.54E-08 | 15 |
| POLR3GL.6   | 2.00E-12 | -0.703499809 | 0.061 | 0.266 | 4.59E-08 | 15 |
| NDUFV2.5    | 2.24E-12 | 1.127236471  | 0.433 | 0.301 | 5.16E-08 | 15 |
| MT2A.15     | 2.34E-12 | 0.561576273  | 0.735 | 0.658 | 5.37E-08 | 15 |
| TMEM14C.4   | 2.44E-12 | 1.167609084  | 0.363 | 0.224 | 5.61E-08 | 15 |
| LITAF.10    | 2.77E-12 | -0.537925456 | 0.139 | 0.371 | 6.37E-08 | 15 |
| PSME1.4     | 3.64E-12 | -0.565514932 | 0.327 | 0.585 | 8.37E-08 | 15 |
| ATP1B1.4    | 4.11E-12 | 0.930100312  | 0.278 | 0.135 | 9.44E-08 | 15 |
| FCER1G.15   | 4.93E-12 | -1.52977294  | 0.11  | 0.306 | 1.13E-07 | 15 |
| LIMS1.10    | 5.15E-12 | -0.797348886 | 0.057 | 0.252 | 1.18E-07 | 15 |
| PPP1CA.2    | 5.29E-12 | -0.762024349 | 0.147 | 0.368 | 1.22E-07 | 15 |
| TUBA4A.12   | 5.43E-12 | -0.8593493   | 0.073 | 0.276 | 1.25E-07 | 15 |
| ATP6V1G1.6  | 5.56E-12 | -0.559844974 | 0.212 | 0.466 | 1.28E-07 | 15 |
| GABARAP.3   | 8.93E-12 | 1.131279424  | 0.318 | 0.182 | 2.05E-07 | 15 |
| PRDX5.5     | 9.70E-12 | 0.891215888  | 0.473 | 0.349 | 2.23E-07 | 15 |
| CMC1.13     | 1.02E-11 | -1.299869144 | 0.09  | 0.288 | 2.33E-07 | 15 |
| DDT.4       | 1.04E-11 | 1.064260479  | 0.412 | 0.282 | 2.40E-07 | 15 |
| SEPT2.5     | 1.05E-11 | -0.617826285 | 0.065 | 0.265 | 2.41E-07 | 15 |
| ARID5B.8    | 1.23E-11 | -0.731479329 | 0.061 | 0.258 | 2.82E-07 | 15 |
| PLA2G16.1   | 1.89E-11 | 0.92016369   | 0.322 | 0.183 | 4.35E-07 | 15 |
| HILPDA.2    | 1.98E-11 | 0.518982323  | 0.265 | 0.125 | 4.56E-07 | 15 |
| IFNGR1.11   | 2.11E-11 | -0.641154121 | 0.069 | 0.262 | 4.86E-07 | 15 |
| PPA1.2      | 2.94E-11 | 1.099493255  | 0.363 | 0.227 | 6.75E-07 | 15 |
| FAM96B.2    | 2.97E-11 | 1.129255747  | 0.416 | 0.29  | 6.82E-07 | 15 |
| C10orf54.10 | 3.55E-11 | -0.725125333 | 0.086 | 0.285 | 8.16E-07 | 15 |
| SAT1.11     | 3.57E-11 | -1.216418826 | 0.429 | 0.635 | 8.21E-07 | 15 |
| LAPTM4A.10  | 4.57E-11 | 1.114262253  | 0.478 | 0.35  | 1.05E-06 | 15 |
| EIF4A1.3    | 5.00E-11 | -0.568070248 | 0.135 | 0.359 | 1.15E-06 | 15 |
| SDCBP.12    | 6.03E-11 | -0.696514127 | 0.155 | 0.376 | 1.39E-06 | 15 |
| SSU72.2     | 6.25E-11 | -0.598872489 | 0.11  | 0.315 | 1.44E-06 | 15 |
| RHOA.10     | 7.76E-11 | -0.578359902 | 0.278 | 0.512 | 1.78E-06 | 15 |
| DRAP1.4     | 7.79E-11 | -0.55784029  | 0.155 | 0.374 | 1.79E-06 | 15 |
| YBX3.3      | 8.94E-11 | 0.821536357  | 0.322 | 0.182 | 2.06E-06 | 15 |
| MRPL22      | 8.97E-11 | 1.18632521   | 0.265 | 0.141 | 2.06E-06 | 15 |
| SNRNP70.3   | 9.74E-11 | -0.534790713 | 0.065 | 0.252 | 2.24E-06 | 15 |
| HLA-DPA1.13 | 1.32E-10 | -1.511081585 | 0.384 | 0.574 | 3.03E-06 | 15 |
| BZW1.4      | 1.33E-10 | -0.634706765 | 0.078 | 0.267 | 3.05E-06 | 15 |
| HSPE1.7     | 1.49E-10 | 0.923739304  | 0.498 | 0.381 | 3.42E-06 | 15 |
| C16orf13.3  | 1.61E-10 | 1.083325313  | 0.363 | 0.237 | 3.71E-06 | 15 |
| NDUFS4.1    | 1.96E-10 | 1.014755524  | 0.335 | 0.205 | 4.52E-06 | 15 |
| HLA-DQA1.11 | 1.99E-10 | -1.385021039 | 0.155 | 0.347 | 4.57E-06 | 15 |
| GGNBP2.1    | 2.04E-10 | -0.563280618 | 0.078 | 0.263 | 4.70E-06 | 15 |
| ST13.9      | 2.77E-10 | 0.873951513  | 0.482 | 0.37  | 6.37E-06 | 15 |
| LINC00152.8 | 2.89E-10 | -0.71242171  | 0.122 | 0.32  | 6.64E-06 | 15 |
| GTF2H5      | 2.92E-10 | 1.058058917  | 0.306 | 0.18  | 6.70E-06 | 15 |
| TYROBP.15   | 3.04E-10 | -1.516697405 | 0.212 | 0.391 | 6.98E-06 | 15 |
| ZNHIT1.3    | 3.21E-10 | 0.971286395  | 0.404 | 0.281 | 7.39E-06 | 15 |
| MRPS21.2    | 3.22E-10 | 1.237139126  | 0.437 | 0.322 | 7.41E-06 | 15 |
| MRPS6.2     | 3.23E-10 | 1.028225617  | 0.298 | 0.169 | 7.43E-06 | 15 |
| ATP5G2.6    | 3.52E-10 | 0.732716788  | 0.657 | 0.655 | 8.08E-06 | 15 |
| CAPZB.6     | 5.35E-10 | -0.516839646 | 0.233 | 0.465 | 1.23E-05 | 15 |

|             |          |              |       |       |             |    |
|-------------|----------|--------------|-------|-------|-------------|----|
| CD63.12     | 8.01E-10 | 0.547578088  | 0.616 | 0.518 | 1.84E-05    | 15 |
| COX8A.4     | 8.80E-10 | 0.970734064  | 0.543 | 0.498 | 2.02E-05    | 15 |
| AIF1.15     | 8.98E-10 | -1.376449882 | 0.094 | 0.262 | 2.06E-05    | 15 |
| PKM.8       | 1.05E-09 | 0.875889414  | 0.535 | 0.432 | 2.41E-05    | 15 |
| H2AFV.2     | 1.35E-09 | -0.521577798 | 0.106 | 0.291 | 3.11E-05    | 15 |
| EIF1AX.3    | 1.36E-09 | -0.553217704 | 0.122 | 0.316 | 3.12E-05    | 15 |
| CSTB.8      | 1.44E-09 | 0.906512988  | 0.49  | 0.396 | 3.32E-05    | 15 |
| VKORC1.2    | 1.45E-09 | 1.083962922  | 0.314 | 0.193 | 3.32E-05    | 15 |
| COA4.1      | 1.64E-09 | 0.947194709  | 0.253 | 0.137 | 3.78E-05    | 15 |
| C9orf78.6   | 1.77E-09 | -0.580853407 | 0.09  | 0.268 | 4.07E-05    | 15 |
| GYPC.10     | 1.88E-09 | -0.549745508 | 0.122 | 0.31  | 4.32E-05    | 15 |
| GPX4.10     | 2.22E-09 | 0.868773501  | 0.535 | 0.452 | 5.10E-05    | 15 |
| ANXA1.13    | 2.69E-09 | -1.038008904 | 0.286 | 0.475 | 6.18E-05    | 15 |
| CHMP2A.6    | 2.77E-09 | 0.882117288  | 0.42  | 0.314 | 6.38E-05    | 15 |
| CDC37.5     | 3.36E-09 | -0.516580206 | 0.122 | 0.312 | 7.71E-05    | 15 |
| HMGN3.3     | 3.52E-09 | 1.073217121  | 0.408 | 0.304 | 8.09E-05    | 15 |
| ZCRB1.1     | 5.21E-09 | 0.985704709  | 0.298 | 0.184 | 0.000119813 | 15 |
| C19orf70.1  | 5.74E-09 | 1.030264337  | 0.367 | 0.255 | 0.000131927 | 15 |
| TAGLN2.10   | 5.96E-09 | 0.798892296  | 0.461 | 0.355 | 0.00013705  | 15 |
| PRR13.3     | 5.98E-09 | 0.985578349  | 0.473 | 0.39  | 0.00013732  | 15 |
| LYZ.13      | 6.77E-09 | -1.979697583 | 0.188 | 0.354 | 0.000155649 | 15 |
| IGKC.11     | 6.80E-09 | -3.461806317 | 0.118 | 0.299 | 0.000156376 | 15 |
| TIMM13.1    | 6.96E-09 | 0.891860139  | 0.314 | 0.2   | 0.000159851 | 15 |
| CD151.3     | 8.10E-09 | 0.951197125  | 0.318 | 0.199 | 0.000186214 | 15 |
| VAMP5.8     | 8.95E-09 | -0.610308635 | 0.127 | 0.311 | 0.000205578 | 15 |
| LINC00998.1 | 9.86E-09 | 0.872312203  | 0.302 | 0.187 | 0.00022659  | 15 |
| RAP1B.6     | 1.01E-08 | -0.510719148 | 0.143 | 0.327 | 0.00023228  | 15 |
| SNRPB2.3    | 1.09E-08 | 1.029405982  | 0.429 | 0.339 | 0.000251298 | 15 |
| NDUFA11.4   | 1.12E-08 | 0.878224707  | 0.473 | 0.393 | 0.000258081 | 15 |
| NDUFB2.3    | 1.32E-08 | 0.850610048  | 0.486 | 0.408 | 0.000303124 | 15 |
| MEA1        | 1.47E-08 | 0.865566826  | 0.273 | 0.162 | 0.00033723  | 15 |
| BIRC3.13    | 1.75E-08 | 1.256766179  | 0.388 | 0.27  | 0.000402618 | 15 |
| SPINT2.3    | 1.98E-08 | 1.106205077  | 0.253 | 0.148 | 0.000454611 | 15 |
| CEBPB.12    | 2.03E-08 | -0.639587519 | 0.151 | 0.332 | 0.00046655  | 15 |
| BAX.4       | 2.13E-08 | -0.53695768  | 0.131 | 0.311 | 0.00048898  | 15 |
| HBB.9       | 2.20E-08 | -2.952087328 | 0.192 | 0.395 | 0.00050588  | 15 |
| ATP5E.9     | 2.31E-08 | 0.513369358  | 0.776 | 0.816 | 0.000530044 | 15 |
| COX5A.4     | 2.46E-08 | 1.201357535  | 0.412 | 0.319 | 0.000565812 | 15 |
| RNF5.1      | 2.75E-08 | 0.834296303  | 0.257 | 0.149 | 0.000631991 | 15 |
| YWHAE.9     | 3.02E-08 | 0.907129936  | 0.412 | 0.311 | 0.000695085 | 15 |
| C3.3        | 3.14E-08 | 0.825233164  | 0.257 | 0.139 | 0.000721551 | 15 |
| MRPS36.1    | 4.16E-08 | 0.908910619  | 0.294 | 0.184 | 0.000956808 | 15 |
| TCEAL4.3    | 4.24E-08 | 0.903785191  | 0.265 | 0.157 | 0.000975087 | 15 |
| PIIB.4      | 7.02E-08 | 0.828438931  | 0.535 | 0.486 | 0.001612785 | 15 |
| SHFM1.8     | 7.95E-08 | 0.870705837  | 0.486 | 0.405 | 0.001827758 | 15 |
| TRAPPC2L.3  | 7.98E-08 | 0.929316898  | 0.286 | 0.179 | 0.00183342  | 15 |
| CNDP2.3     | 9.15E-08 | 1.089637541  | 0.314 | 0.211 | 0.002101959 | 15 |
| GLUL.11     | 1.02E-07 | -0.658727702 | 0.147 | 0.309 | 0.00234989  | 15 |
| TIMM8B      | 1.24E-07 | 0.889452524  | 0.31  | 0.205 | 0.002843053 | 15 |
| NDUFC2.5    | 1.56E-07 | 0.959697504  | 0.384 | 0.294 | 0.00359312  | 15 |
| COA3.1      | 1.60E-07 | 0.815269184  | 0.257 | 0.156 | 0.003667568 | 15 |
| EDF1.4      | 2.13E-07 | 0.830620845  | 0.555 | 0.545 | 0.004884678 | 15 |
| CEBPD.10    | 2.17E-07 | -0.717994008 | 0.127 | 0.282 | 0.004991668 | 15 |
| CWC15       | 2.45E-07 | 0.9509618    | 0.318 | 0.217 | 0.005640203 | 15 |
| NDUFB5.6    | 3.14E-07 | 0.98116039   | 0.343 | 0.247 | 0.007212442 | 15 |
| TRMT112.5   | 3.85E-07 | 0.813776671  | 0.478 | 0.42  | 0.008843083 | 15 |
| ECH1.5      | 5.28E-07 | 0.999043804  | 0.404 | 0.314 | 0.012125338 | 15 |
| MORF4L2.3   | 5.74E-07 | 0.923285952  | 0.278 | 0.178 | 0.013195693 | 15 |

|            |           |              |       |       |             |    |
|------------|-----------|--------------|-------|-------|-------------|----|
| POLR2J.2   | 6.69E-07  | 1.003720301  | 0.347 | 0.252 | 0.015379695 | 15 |
| ATP6V1F.9  | 7.32E-07  | 0.738513252  | 0.429 | 0.348 | 0.016823035 | 15 |
| TMEM258.4  | 7.38E-07  | 0.929636191  | 0.518 | 0.497 | 0.016963714 | 15 |
| EIF4EBP1.1 | 7.89E-07  | 0.687625269  | 0.261 | 0.164 | 0.018136768 | 15 |
| MZT2B.5    | 8.69E-07  | 0.884928216  | 0.437 | 0.36  | 0.019977353 | 15 |
| ATP5L.6    | 1.08E-06  | 0.634888152  | 0.665 | 0.675 | 0.024792319 | 15 |
| CAMTA1.1   | 1.18E-06  | 0.878319556  | 0.286 | 0.193 | 0.027163298 | 15 |
| CD68.4     | 1.31E-06  | 0.576233694  | 0.306 | 0.194 | 0.030078897 | 15 |
| PGAM1.7    | 1.74E-06  | 0.747023625  | 0.429 | 0.359 | 0.03995159  | 15 |
| GUK1.4     | 1.76E-06  | 0.795676298  | 0.535 | 0.506 | 0.040474914 | 15 |
| SRP14.4    | 1.79E-06  | 0.5344239    | 0.673 | 0.716 | 0.041105188 | 15 |
| EIF5A.5    | 1.86E-06  | 0.572472388  | 0.327 | 0.228 | 0.042722474 | 15 |
| TMEM230.2  | 2.16E-06  | 1.082413662  | 0.392 | 0.327 | 0.049599718 | 15 |
| JCHAIN     | 0         | 7.010665981  | 0.739 | 0.033 | 0           | 16 |
| IGHGP      | 0         | 5.068958315  | 0.365 | 0.008 | 0           | 16 |
| CD79A      | 0         | 2.292154138  | 0.374 | 0.009 | 0           | 16 |
| IGHG4      | 7.51E-280 | 6.642453192  | 0.517 | 0.035 | 1.72E-275   | 16 |
| IGHG3      | 1.42E-250 | 7.594461463  | 0.569 | 0.049 | 3.26E-246   | 16 |
| IGHG1      | 2.09E-212 | 6.273842686  | 0.573 | 0.061 | 4.81E-208   | 16 |
| MZB1       | 3.81E-194 | 2.587007138  | 0.341 | 0.021 | 8.75E-190   | 16 |
| IGHM       | 3.15E-161 | 4.881207505  | 0.251 | 0.013 | 7.23E-157   | 16 |
| IGLC3      | 1.27E-130 | 8.071569639  | 0.412 | 0.049 | 2.92E-126   | 16 |
| IGLC2.1    | 1.61E-96  | 8.332413104  | 0.464 | 0.084 | 3.71E-92    | 16 |
| IGKC.12    | 3.04E-65  | 8.300476953  | 0.682 | 0.29  | 6.98E-61    | 16 |
| IGHA1.2    | 4.15E-43  | 7.027222881  | 0.37  | 0.101 | 9.53E-39    | 16 |
| B2M.12     | 2.35E-42  | -0.836145866 | 0.995 | 0.988 | 5.40E-38    | 16 |
| HLA-A.12   | 1.32E-38  | -1.206849925 | 0.692 | 0.897 | 3.04E-34    | 16 |
| GAPDH.10   | 3.86E-33  | -1.356189861 | 0.507 | 0.872 | 8.87E-29    | 16 |
| HLA-B.13   | 3.01E-30  | -0.864524202 | 0.758 | 0.916 | 6.92E-26    | 16 |
| IL32.13    | 4.94E-30  | -2.080321327 | 0.19  | 0.584 | 1.14E-25    | 16 |
| TMSB4X.8   | 9.49E-30  | -0.802861703 | 0.995 | 0.976 | 2.18E-25    | 16 |
| VIM.13     | 5.75E-29  | -1.336515075 | 0.441 | 0.776 | 1.32E-24    | 16 |
| HCST.12    | 7.76E-29  | -1.388630686 | 0.128 | 0.551 | 1.78E-24    | 16 |
| ID2.11     | 4.51E-28  | -1.464300287 | 0.156 | 0.57  | 1.04E-23    | 16 |
| FYB.14     | 3.58E-26  | -1.372602762 | 0.076 | 0.466 | 8.22E-22    | 16 |
| TMSB10.10  | 8.14E-26  | -0.819444486 | 0.9   | 0.961 | 1.87E-21    | 16 |
| CD2.15     | 8.57E-25  | -1.682002927 | 0.085 | 0.463 | 1.97E-20    | 16 |
| MYL6.7     | 4.59E-24  | -0.934928033 | 0.493 | 0.801 | 1.05E-19    | 16 |
| ARPC2.10   | 9.60E-24  | -1.184696527 | 0.313 | 0.643 | 2.21E-19    | 16 |
| ACTG1.8    | 1.67E-23  | -1.017005385 | 0.412 | 0.75  | 3.83E-19    | 16 |
| CD3E.15    | 7.00E-23  | -1.468060903 | 0.057 | 0.403 | 1.61E-18    | 16 |
| CD3D.16    | 9.12E-23  | -1.593949846 | 0.133 | 0.48  | 2.10E-18    | 16 |
| ITM2B.11   | 1.10E-22  | -0.924219947 | 0.483 | 0.784 | 2.53E-18    | 16 |
| PTPRC.14   | 1.12E-22  | -1.179784247 | 0.275 | 0.622 | 2.58E-18    | 16 |
| UQCR11.4   | 1.90E-22  | -1.035573289 | 0.261 | 0.615 | 4.37E-18    | 16 |
| TNFAIP3.15 | 2.07E-22  | -1.560719546 | 0.114 | 0.452 | 4.75E-18    | 16 |
| ACTB.11    | 2.69E-22  | -0.799576113 | 0.844 | 0.93  | 6.19E-18    | 16 |
| ITGB1.9    | 7.55E-22  | -1.431626938 | 0.133 | 0.469 | 1.73E-17    | 16 |
| CCL5.15    | 8.57E-22  | -1.92774585  | 0.256 | 0.566 | 1.97E-17    | 16 |
| S100A10.9  | 1.96E-21  | -1.201497134 | 0.265 | 0.615 | 4.51E-17    | 16 |
| GIMAP4.11  | 1.97E-21  | -1.314635544 | 0.019 | 0.343 | 4.52E-17    | 16 |
| HLA-C.12   | 3.40E-21  | -0.698835822 | 0.782 | 0.884 | 7.81E-17    | 16 |
| ATP5E.10   | 4.39E-21  | -0.870127455 | 0.555 | 0.82  | 1.01E-16    | 16 |
| COX6C.5    | 8.58E-21  | -1.02432887  | 0.232 | 0.572 | 1.97E-16    | 16 |
| AAK1.15    | 3.73E-20  | -0.961434698 | 0.057 | 0.375 | 8.57E-16    | 16 |
| SRP14.5    | 4.57E-20  | -0.926064518 | 0.417 | 0.72  | 1.05E-15    | 16 |
| GZMA.15    | 5.19E-20  | -1.593430883 | 0.104 | 0.424 | 1.19E-15    | 16 |
| SSR4.2     | 5.73E-20  | 1.900409007  | 0.649 | 0.531 | 1.32E-15    | 16 |

|             |          |              |       |       |          |    |
|-------------|----------|--------------|-------|-------|----------|----|
| ITGB2.13    | 9.33E-20 | -1.021949925 | 0.095 | 0.42  | 2.14E-15 | 16 |
| CST7.14     | 1.80E-19 | -1.681891103 | 0.085 | 0.394 | 4.13E-15 | 16 |
| MYL12A.7    | 1.83E-19 | -0.911849805 | 0.374 | 0.695 | 4.20E-15 | 16 |
| SKP1.3      | 2.37E-19 | -1.000819328 | 0.28  | 0.608 | 5.44E-15 | 16 |
| SUMO2.4     | 3.11E-19 | -0.881460425 | 0.299 | 0.612 | 7.14E-15 | 16 |
| MYL12B.4    | 4.07E-19 | -0.786626325 | 0.299 | 0.64  | 9.35E-15 | 16 |
| RARRES3.11  | 1.13E-18 | -1.264044341 | 0.109 | 0.415 | 2.59E-14 | 16 |
| ENO1.13     | 4.32E-18 | -1.242148588 | 0.294 | 0.598 | 9.92E-14 | 16 |
| PSMA7.6     | 6.24E-18 | -0.933554006 | 0.213 | 0.528 | 1.43E-13 | 16 |
| GUK1.5      | 1.15E-17 | -0.678875274 | 0.185 | 0.512 | 2.64E-13 | 16 |
| HSP90AA1.9  | 1.19E-17 | -1.114925857 | 0.37  | 0.658 | 2.73E-13 | 16 |
| NDUFS5.6    | 1.25E-17 | -0.761521648 | 0.204 | 0.537 | 2.86E-13 | 16 |
| CD99.11     | 1.66E-17 | -0.804859078 | 0.166 | 0.475 | 3.82E-13 | 16 |
| ARL6IP5.11  | 3.10E-17 | -0.93877803  | 0.166 | 0.462 | 7.13E-13 | 16 |
| CCL4.16     | 4.05E-17 | -2.257186226 | 0.161 | 0.444 | 9.30E-13 | 16 |
| HSPA8.9     | 4.36E-17 | -0.847236092 | 0.261 | 0.559 | 1.00E-12 | 16 |
| HMGB1.10    | 4.72E-17 | -0.785868123 | 0.431 | 0.739 | 1.09E-12 | 16 |
| YWHAB.8     | 5.41E-17 | -0.643618095 | 0.175 | 0.492 | 1.24E-12 | 16 |
| HLA-E.14    | 5.44E-17 | -0.782734388 | 0.493 | 0.794 | 1.25E-12 | 16 |
| SON.11      | 5.65E-17 | -0.809251225 | 0.265 | 0.574 | 1.30E-12 | 16 |
| HMG2.4      | 6.20E-17 | -1.030636762 | 0.199 | 0.505 | 1.43E-12 | 16 |
| COX5B.6     | 6.92E-17 | -0.859759799 | 0.246 | 0.551 | 1.59E-12 | 16 |
| TMA7.9      | 9.29E-17 | -0.772965376 | 0.408 | 0.7   | 2.14E-12 | 16 |
| RPS24.9     | 1.35E-16 | -0.586536013 | 0.777 | 0.915 | 3.10E-12 | 16 |
| GZMK.16     | 1.99E-16 | -2.053948966 | 0.1   | 0.369 | 4.58E-12 | 16 |
| TPM3.6      | 2.30E-16 | -1.071134884 | 0.171 | 0.458 | 5.29E-12 | 16 |
| PIK3R1.13   | 2.32E-16 | -1.126953415 | 0.043 | 0.312 | 5.33E-12 | 16 |
| GIMAP7.14   | 2.39E-16 | -1.062763372 | 0.024 | 0.288 | 5.50E-12 | 16 |
| ITM2A.15    | 3.38E-16 | -1.521586706 | 0.052 | 0.314 | 7.77E-12 | 16 |
| CTSD.9      | 4.35E-16 | -1.034058035 | 0.161 | 0.441 | 9.99E-12 | 16 |
| TRBC2.15    | 4.45E-16 | -1.563605869 | 0.118 | 0.381 | 1.02E-11 | 16 |
| CD3G.15     | 4.79E-16 | -1.106637008 | 0.033 | 0.297 | 1.10E-11 | 16 |
| PRKCH.11    | 7.02E-16 | -1.066163223 | 0.009 | 0.257 | 1.61E-11 | 16 |
| RGS1.16     | 7.13E-16 | -1.196056836 | 0.46  | 0.7   | 1.64E-11 | 16 |
| DUSP2.15    | 8.65E-16 | -1.572416946 | 0.166 | 0.435 | 1.99E-11 | 16 |
| PIM2.1      | 9.06E-16 | 1.163996499  | 0.251 | 0.093 | 2.08E-11 | 16 |
| TRAC.16     | 1.31E-15 | -1.104596623 | 0.142 | 0.436 | 3.01E-11 | 16 |
| USMG5.6     | 1.43E-15 | -0.737514825 | 0.232 | 0.533 | 3.28E-11 | 16 |
| PRMT2.9     | 1.52E-15 | -0.980403265 | 0.038 | 0.293 | 3.50E-11 | 16 |
| COMMD6.7    | 1.68E-15 | -0.77000849  | 0.308 | 0.61  | 3.85E-11 | 16 |
| LINC00152.9 | 2.02E-15 | -1.102026425 | 0.062 | 0.321 | 4.64E-11 | 16 |
| RNF213.11   | 2.03E-15 | -1.052170656 | 0.123 | 0.391 | 4.67E-11 | 16 |
| S100A11.13  | 2.45E-15 | -0.865744884 | 0.294 | 0.595 | 5.64E-11 | 16 |
| CD7.13      | 3.10E-15 | -1.24628965  | 0.047 | 0.304 | 7.12E-11 | 16 |
| CALM1.8     | 3.35E-15 | -0.796363541 | 0.303 | 0.6   | 7.69E-11 | 16 |
| S100A4.14   | 3.40E-15 | -0.82070478  | 0.436 | 0.703 | 7.81E-11 | 16 |
| HNRNPA1.6   | 3.62E-15 | -0.735330225 | 0.512 | 0.781 | 8.31E-11 | 16 |
| SLA.13      | 3.84E-15 | -0.771666271 | 0.128 | 0.403 | 8.82E-11 | 16 |
| ATP5I.3     | 3.94E-15 | -0.893842656 | 0.242 | 0.524 | 9.06E-11 | 16 |
| LCK.16      | 4.09E-15 | -1.033653992 | 0.043 | 0.291 | 9.40E-11 | 16 |
| TP1.10      | 4.77E-15 | -0.944476425 | 0.28  | 0.569 | 1.10E-10 | 16 |
| VAMP8.9     | 5.70E-15 | -0.656968201 | 0.18  | 0.465 | 1.31E-10 | 16 |
| CFL1.5      | 6.30E-15 | -0.605906783 | 0.512 | 0.75  | 1.45E-10 | 16 |
| ANXA1.14    | 7.80E-15 | -0.761868532 | 0.166 | 0.476 | 1.79E-10 | 16 |
| FYN.11      | 1.05E-14 | -1.201717695 | 0.033 | 0.269 | 2.41E-10 | 16 |
| RAC1.9      | 1.07E-14 | -0.968900835 | 0.185 | 0.452 | 2.46E-10 | 16 |
| ARPC1B.8    | 1.10E-14 | -0.783881108 | 0.242 | 0.529 | 2.53E-10 | 16 |
| RHOA.11     | 1.13E-14 | -0.889201291 | 0.256 | 0.512 | 2.60E-10 | 16 |

|             |          |              |       |       |          |    |
|-------------|----------|--------------|-------|-------|----------|----|
| APOE.10     | 1.28E-14 | -2.583647675 | 0.194 | 0.442 | 2.95E-10 | 16 |
| NUCKS1.5    | 1.51E-14 | -0.896470216 | 0.133 | 0.402 | 3.46E-10 | 16 |
| IFITM3.14   | 2.00E-14 | -1.536251733 | 0.128 | 0.382 | 4.60E-10 | 16 |
| LDHA.13     | 2.25E-14 | -1.152148132 | 0.303 | 0.583 | 5.18E-10 | 16 |
| SHFM1.9     | 2.26E-14 | -0.947760952 | 0.142 | 0.411 | 5.19E-10 | 16 |
| JAK1.10     | 2.44E-14 | -1.018907062 | 0.137 | 0.399 | 5.61E-10 | 16 |
| PFN1.10     | 3.18E-14 | -0.592258255 | 0.517 | 0.764 | 7.31E-10 | 16 |
| SH3BGRL3.12 | 3.21E-14 | -0.748644369 | 0.436 | 0.686 | 7.37E-10 | 16 |
| ATP5J2.4    | 3.31E-14 | -0.831275517 | 0.175 | 0.436 | 7.61E-10 | 16 |
| SYNE2.15    | 3.35E-14 | -0.940728777 | 0.085 | 0.336 | 7.70E-10 | 16 |
| SERF2.6     | 3.40E-14 | -0.661032465 | 0.616 | 0.821 | 7.81E-10 | 16 |
| CLEC2B.9    | 3.49E-14 | -0.62518188  | 0.104 | 0.382 | 8.01E-10 | 16 |
| PSME1.5     | 3.52E-14 | -0.624818936 | 0.308 | 0.585 | 8.09E-10 | 16 |
| MSN.9       | 3.64E-14 | -0.812772425 | 0.114 | 0.37  | 8.36E-10 | 16 |
| GSTK1.4     | 3.78E-14 | -0.692934072 | 0.137 | 0.407 | 8.68E-10 | 16 |
| CD96.16     | 4.16E-14 | -0.999517618 | 0.024 | 0.252 | 9.57E-10 | 16 |
| MYO1F.11    | 4.43E-14 | -0.781152934 | 0.038 | 0.275 | 1.02E-09 | 16 |
| HMGB2.11    | 4.77E-14 | -0.756508494 | 0.204 | 0.48  | 1.10E-09 | 16 |
| UBL5.5      | 4.98E-14 | -0.799627567 | 0.303 | 0.566 | 1.14E-09 | 16 |
| LCP1.13     | 5.23E-14 | -0.753163097 | 0.147 | 0.408 | 1.20E-09 | 16 |
| IFI16.6     | 5.50E-14 | -0.682263862 | 0.194 | 0.485 | 1.26E-09 | 16 |
| SOD1.9      | 5.77E-14 | -0.779578211 | 0.213 | 0.486 | 1.32E-09 | 16 |
| PSMB8.8     | 6.89E-14 | -0.832810825 | 0.128 | 0.385 | 1.58E-09 | 16 |
| BTG1.15     | 7.00E-14 | -0.686604479 | 0.635 | 0.846 | 1.61E-09 | 16 |
| TRBC1.15    | 7.59E-14 | -1.23771345  | 0.1   | 0.357 | 1.74E-09 | 16 |
| SARAF.8     | 7.65E-14 | -0.612140432 | 0.422 | 0.682 | 1.76E-09 | 16 |
| FKBP5.10    | 8.19E-14 | -0.857974418 | 0.147 | 0.399 | 1.88E-09 | 16 |
| SEPW1.12    | 8.71E-14 | -0.962501904 | 0.114 | 0.363 | 2.00E-09 | 16 |
| DNAJB1.12   | 1.01E-13 | -1.055879279 | 0.156 | 0.424 | 2.32E-09 | 16 |
| ATP5G2.7    | 1.06E-13 | -0.61363879  | 0.398 | 0.659 | 2.43E-09 | 16 |
| HNRNPC.5    | 1.13E-13 | -0.786206737 | 0.213 | 0.48  | 2.60E-09 | 16 |
| DYNLT1.4    | 1.21E-13 | -0.816981168 | 0.085 | 0.335 | 2.79E-09 | 16 |
| CAPZB.7     | 1.55E-13 | -0.537046558 | 0.204 | 0.465 | 3.55E-09 | 16 |
| CTSC.13     | 1.85E-13 | -0.785032794 | 0.104 | 0.35  | 4.26E-09 | 16 |
| TPT1.11     | 1.96E-13 | -0.515649743 | 0.834 | 0.925 | 4.49E-09 | 16 |
| TSPO.8      | 2.05E-13 | -0.620405595 | 0.166 | 0.424 | 4.70E-09 | 16 |
| EVL.15      | 2.27E-13 | -0.701717554 | 0.227 | 0.499 | 5.21E-09 | 16 |
| CLIC1.5     | 3.36E-13 | -0.576966312 | 0.36  | 0.636 | 7.73E-09 | 16 |
| UBB.7       | 3.61E-13 | -0.621935291 | 0.469 | 0.723 | 8.31E-09 | 16 |
| RHOC.10     | 3.64E-13 | -0.903329009 | 0.085 | 0.327 | 8.37E-09 | 16 |
| LDHB.9      | 3.69E-13 | -0.840265452 | 0.213 | 0.47  | 8.47E-09 | 16 |
| SUB1.5      | 3.72E-13 | -0.603366605 | 0.294 | 0.578 | 8.56E-09 | 16 |
| NDUFA3.6    | 4.49E-13 | -0.679363851 | 0.142 | 0.395 | 1.03E-08 | 16 |
| IGFBP7.13   | 4.64E-13 | -2.64763262  | 0.142 | 0.382 | 1.07E-08 | 16 |
| MBNL1.9     | 4.78E-13 | -0.823037103 | 0.114 | 0.359 | 1.10E-08 | 16 |
| DYNLRB1.6   | 5.26E-13 | -1.002170864 | 0.095 | 0.325 | 1.21E-08 | 16 |
| UQCRB.6     | 5.41E-13 | -0.624855117 | 0.474 | 0.748 | 1.24E-08 | 16 |
| GLRX.9      | 5.94E-13 | -0.863917106 | 0.071 | 0.301 | 1.36E-08 | 16 |
| GNAS.7      | 6.49E-13 | -0.843681912 | 0.109 | 0.348 | 1.49E-08 | 16 |
| NEDD8.3     | 6.58E-13 | -0.634115404 | 0.175 | 0.435 | 1.51E-08 | 16 |
| COX7C.6     | 7.27E-13 | -0.646303592 | 0.521 | 0.757 | 1.67E-08 | 16 |
| IL7R.14     | 7.27E-13 | -1.607376744 | 0.076 | 0.307 | 1.67E-08 | 16 |
| ALDOA.7     | 7.56E-13 | -0.887007205 | 0.389 | 0.641 | 1.74E-08 | 16 |
| NKG7.16     | 8.40E-13 | -1.61310822  | 0.194 | 0.431 | 1.93E-08 | 16 |
| GBP2.7      | 9.18E-13 | -0.772241357 | 0.043 | 0.266 | 2.11E-08 | 16 |
| COX8A.5     | 9.54E-13 | -0.617589114 | 0.246 | 0.503 | 2.19E-08 | 16 |
| COX6A1.5    | 9.61E-13 | -0.646671498 | 0.246 | 0.523 | 2.21E-08 | 16 |
| PSMB9.7     | 1.04E-12 | -0.688914952 | 0.227 | 0.488 | 2.39E-08 | 16 |

|             |          |              |       |       |          |    |
|-------------|----------|--------------|-------|-------|----------|----|
| RBPJ.10     | 1.08E-12 | -0.926747676 | 0.09  | 0.325 | 2.48E-08 | 16 |
| PA2G4.1     | 1.11E-12 | -0.860963052 | 0.137 | 0.382 | 2.55E-08 | 16 |
| AKAP13.11   | 1.11E-12 | -0.796390043 | 0.19  | 0.436 | 2.56E-08 | 16 |
| HSPB1.14    | 1.13E-12 | -1.247579823 | 0.199 | 0.438 | 2.61E-08 | 16 |
| NDUFB8.2    | 1.33E-12 | -0.8507217   | 0.147 | 0.381 | 3.06E-08 | 16 |
| HLA-F.11    | 1.34E-12 | -0.664691458 | 0.19  | 0.442 | 3.08E-08 | 16 |
| SYTL3.14    | 1.42E-12 | -0.805274984 | 0.052 | 0.28  | 3.26E-08 | 16 |
| RTN4.12     | 1.54E-12 | -0.677937427 | 0.109 | 0.354 | 3.53E-08 | 16 |
| CD44.11     | 1.54E-12 | -0.864745473 | 0.246 | 0.495 | 3.54E-08 | 16 |
| PPIA.6      | 1.89E-12 | -0.559102833 | 0.403 | 0.651 | 4.35E-08 | 16 |
| DDIT4.10    | 2.19E-12 | -1.055804734 | 0.256 | 0.522 | 5.02E-08 | 16 |
| BSG.7       | 2.36E-12 | -0.873360741 | 0.104 | 0.332 | 5.42E-08 | 16 |
| WIPF1.14    | 2.42E-12 | -0.732871901 | 0.114 | 0.347 | 5.56E-08 | 16 |
| JUN.10      | 2.63E-12 | -0.987006371 | 0.441 | 0.695 | 6.04E-08 | 16 |
| LEPROTL1.8  | 2.68E-12 | -0.601141288 | 0.142 | 0.393 | 6.16E-08 | 16 |
| SEPT7.8     | 2.69E-12 | -0.624600368 | 0.242 | 0.517 | 6.18E-08 | 16 |
| MCL1.9      | 2.77E-12 | -0.563643197 | 0.256 | 0.518 | 6.36E-08 | 16 |
| NDUFC2.6    | 2.89E-12 | -0.809123022 | 0.076 | 0.299 | 6.63E-08 | 16 |
| MIF.13      | 2.90E-12 | -1.120680226 | 0.251 | 0.509 | 6.67E-08 | 16 |
| PGK1.10     | 2.97E-12 | -0.546634873 | 0.199 | 0.454 | 6.82E-08 | 16 |
| ARHGDIB.9   | 3.04E-12 | -0.538114342 | 0.427 | 0.676 | 6.98E-08 | 16 |
| HSPE1.8     | 3.15E-12 | -0.770922833 | 0.137 | 0.387 | 7.25E-08 | 16 |
| PSMB1.4     | 3.18E-12 | -0.538775029 | 0.171 | 0.428 | 7.31E-08 | 16 |
| UBE2L3.5    | 3.21E-12 | -0.90537734  | 0.09  | 0.319 | 7.37E-08 | 16 |
| CAP1.6      | 3.77E-12 | -0.65046843  | 0.171 | 0.415 | 8.66E-08 | 16 |
| XRCC5.5     | 3.82E-12 | -0.795648681 | 0.1   | 0.328 | 8.77E-08 | 16 |
| GSTO1.7     | 3.97E-12 | -0.88582241  | 0.1   | 0.326 | 9.12E-08 | 16 |
| HNRNPK.3    | 3.97E-12 | -0.573403666 | 0.275 | 0.54  | 9.13E-08 | 16 |
| SRSF7.13    | 4.04E-12 | -0.77687753  | 0.284 | 0.549 | 9.29E-08 | 16 |
| TMEM50A.5   | 4.15E-12 | -0.672912953 | 0.114 | 0.34  | 9.54E-08 | 16 |
| PTMA.7      | 4.16E-12 | -0.503414624 | 0.744 | 0.92  | 9.56E-08 | 16 |
| RBX1.4      | 4.42E-12 | -0.710727305 | 0.142 | 0.379 | 1.01E-07 | 16 |
| CBX3.2      | 5.11E-12 | -0.738882326 | 0.114 | 0.348 | 1.17E-07 | 16 |
| COX7A2.3    | 5.72E-12 | -0.590622156 | 0.299 | 0.565 | 1.31E-07 | 16 |
| PRPF38B.13  | 5.93E-12 | -0.869021196 | 0.209 | 0.439 | 1.36E-07 | 16 |
| HNRNPA2B1.7 | 6.16E-12 | -0.638278745 | 0.36  | 0.631 | 1.42E-07 | 16 |
| AP2M1.3     | 6.76E-12 | -0.662996625 | 0.104 | 0.327 | 1.55E-07 | 16 |
| FUS.11      | 6.85E-12 | -0.557430996 | 0.213 | 0.473 | 1.57E-07 | 16 |
| PAIP2.3     | 7.35E-12 | -0.543876258 | 0.147 | 0.387 | 1.69E-07 | 16 |
| SERBP1.2    | 7.61E-12 | -0.69215844  | 0.171 | 0.407 | 1.75E-07 | 16 |
| YWHAQ.6     | 7.65E-12 | -0.731350119 | 0.123 | 0.352 | 1.76E-07 | 16 |
| SCP2.5      | 8.05E-12 | -0.642253889 | 0.1   | 0.329 | 1.85E-07 | 16 |
| FXVD5.9     | 8.31E-12 | -0.675309898 | 0.246 | 0.484 | 1.91E-07 | 16 |
| COX7B.4     | 8.43E-12 | -0.526843029 | 0.223 | 0.474 | 1.94E-07 | 16 |
| EID1.5      | 8.58E-12 | -0.571663273 | 0.171 | 0.432 | 1.97E-07 | 16 |
| RGCC.14     | 8.59E-12 | -1.087754977 | 0.085 | 0.311 | 1.97E-07 | 16 |
| SNRPD2.6    | 8.62E-12 | -0.565555836 | 0.313 | 0.561 | 1.98E-07 | 16 |
| HNRNPA3.4   | 8.81E-12 | -0.542189024 | 0.209 | 0.467 | 2.02E-07 | 16 |
| PPP1CA.3    | 9.01E-12 | -0.678662119 | 0.137 | 0.368 | 2.07E-07 | 16 |
| S100A8.5    | 1.35E-11 | 0.75310011   | 0.37  | 0.208 | 3.10E-07 | 16 |
| C12orf57.9  | 1.52E-11 | -0.771045762 | 0.147 | 0.375 | 3.48E-07 | 16 |
| ERH.3       | 1.57E-11 | -0.60725473  | 0.133 | 0.364 | 3.61E-07 | 16 |
| PKM.9       | 1.58E-11 | -0.72582327  | 0.194 | 0.437 | 3.63E-07 | 16 |
| WNK1.9      | 1.60E-11 | -0.815573726 | 0.047 | 0.252 | 3.67E-07 | 16 |
| HSP90AB1.7  | 1.68E-11 | -0.748841809 | 0.374 | 0.605 | 3.86E-07 | 16 |
| TXN.11      | 1.84E-11 | -0.948319127 | 0.166 | 0.392 | 4.23E-07 | 16 |
| KIF5B.4     | 1.87E-11 | -0.578830136 | 0.071 | 0.287 | 4.29E-07 | 16 |
| H2AFZ.3     | 2.06E-11 | -0.741995139 | 0.166 | 0.393 | 4.73E-07 | 16 |

|             |          |              |       |       |          |    |
|-------------|----------|--------------|-------|-------|----------|----|
| VAMP5.9     | 2.16E-11 | -0.629244802 | 0.09  | 0.311 | 4.96E-07 | 16 |
| OST4.5      | 2.28E-11 | -0.527384314 | 0.393 | 0.664 | 5.24E-07 | 16 |
| PIK3IP1.15  | 2.68E-11 | -0.82688938  | 0.137 | 0.361 | 6.16E-07 | 16 |
| PTP4A2.8    | 2.81E-11 | -0.798678764 | 0.066 | 0.274 | 6.46E-07 | 16 |
| ODF2L.10    | 2.88E-11 | -0.985766718 | 0.062 | 0.262 | 6.62E-07 | 16 |
| CARD16.10   | 3.67E-11 | -0.541893156 | 0.1   | 0.321 | 8.42E-07 | 16 |
| HP1BP3.6    | 4.13E-11 | -0.794189649 | 0.081 | 0.288 | 9.48E-07 | 16 |
| ARF1.2      | 4.62E-11 | -0.661003691 | 0.18  | 0.412 | 1.06E-06 | 16 |
| SH3KBP1.12  | 4.69E-11 | -0.639016941 | 0.095 | 0.311 | 1.08E-06 | 16 |
| CCNH.11     | 5.34E-11 | -0.782438363 | 0.081 | 0.287 | 1.23E-06 | 16 |
| RAB7A.5     | 5.63E-11 | -0.610502758 | 0.1   | 0.318 | 1.29E-06 | 16 |
| BLOC1S1.7   | 6.29E-11 | -0.558823445 | 0.128 | 0.35  | 1.45E-06 | 16 |
| COX6B1.2    | 6.30E-11 | -0.502962857 | 0.327 | 0.577 | 1.45E-06 | 16 |
| GPX4.11     | 6.62E-11 | -0.876391026 | 0.237 | 0.457 | 1.52E-06 | 16 |
| CKLF.9      | 6.90E-11 | -0.520281504 | 0.137 | 0.367 | 1.59E-06 | 16 |
| MORF4L1.2   | 6.98E-11 | -0.674738554 | 0.308 | 0.539 | 1.61E-06 | 16 |
| VMP1.10     | 7.44E-11 | -0.633188664 | 0.104 | 0.323 | 1.71E-06 | 16 |
| PLIN2.12    | 7.61E-11 | -1.045962928 | 0.123 | 0.339 | 1.75E-06 | 16 |
| MPC2.10     | 7.91E-11 | -0.889072745 | 0.066 | 0.267 | 1.82E-06 | 16 |
| CSNK1A1.3   | 8.27E-11 | -0.621903785 | 0.09  | 0.307 | 1.90E-06 | 16 |
| BAX.5       | 9.31E-11 | -0.577624043 | 0.095 | 0.311 | 2.14E-06 | 16 |
| S100A9.14   | 9.32E-11 | 1.322290433  | 0.408 | 0.249 | 2.14E-06 | 16 |
| UGP2.10     | 9.94E-11 | -0.624904477 | 0.109 | 0.329 | 2.28E-06 | 16 |
| MACF1.10    | 1.00E-10 | -0.613273069 | 0.057 | 0.26  | 2.31E-06 | 16 |
| CEBPD.11    | 1.19E-10 | -0.88514782  | 0.081 | 0.282 | 2.73E-06 | 16 |
| HNRNPF.1    | 1.20E-10 | -0.518230327 | 0.137 | 0.358 | 2.76E-06 | 16 |
| UQCR10.3    | 1.23E-10 | -0.6665039   | 0.218 | 0.44  | 2.82E-06 | 16 |
| PPP1R12A.7  | 1.37E-10 | -0.627410189 | 0.076 | 0.282 | 3.14E-06 | 16 |
| TLN1.5      | 1.40E-10 | -0.591639191 | 0.066 | 0.268 | 3.22E-06 | 16 |
| CALM2.5     | 1.40E-10 | -0.546556953 | 0.403 | 0.634 | 3.23E-06 | 16 |
| GPX1.12     | 1.66E-10 | -1.105535409 | 0.213 | 0.432 | 3.82E-06 | 16 |
| HNRNPU.5    | 1.81E-10 | -0.741708119 | 0.161 | 0.377 | 4.15E-06 | 16 |
| RBM25.8     | 2.07E-10 | -0.568306484 | 0.142 | 0.363 | 4.77E-06 | 16 |
| ETS1.14     | 2.08E-10 | -0.71491209  | 0.128 | 0.342 | 4.78E-06 | 16 |
| ALOX5AP.12  | 2.17E-10 | -0.988767972 | 0.128 | 0.332 | 4.98E-06 | 16 |
| RAN.4       | 2.19E-10 | -0.719655424 | 0.213 | 0.429 | 5.03E-06 | 16 |
| PSME2.6     | 2.29E-10 | -0.586134602 | 0.194 | 0.416 | 5.26E-06 | 16 |
| RGS10.10    | 2.35E-10 | -0.588554138 | 0.095 | 0.298 | 5.40E-06 | 16 |
| CELF2.12    | 2.39E-10 | -0.639133841 | 0.204 | 0.429 | 5.48E-06 | 16 |
| PEBP1.12    | 2.42E-10 | -0.7373709   | 0.171 | 0.393 | 5.57E-06 | 16 |
| EMB.12      | 2.77E-10 | -0.735614065 | 0.076 | 0.272 | 6.37E-06 | 16 |
| MYH9.10     | 2.79E-10 | -0.742992126 | 0.109 | 0.314 | 6.42E-06 | 16 |
| APOBEC3G.13 | 3.08E-10 | -0.9903988   | 0.085 | 0.274 | 7.09E-06 | 16 |
| NDUFA4L2.15 | 3.17E-10 | -2.115207211 | 0.1   | 0.291 | 7.29E-06 | 16 |
| SNRPB2.4    | 3.21E-10 | -0.589684546 | 0.133 | 0.343 | 7.38E-06 | 16 |
| NFKBIA.14   | 3.61E-10 | -0.913218426 | 0.336 | 0.561 | 8.30E-06 | 16 |
| YWHAH.13    | 3.65E-10 | -1.115694774 | 0.095 | 0.286 | 8.38E-06 | 16 |
| GABARAPL2.4 | 3.71E-10 | -0.510597405 | 0.133 | 0.351 | 8.53E-06 | 16 |
| LIMS1.11    | 3.72E-10 | -0.591730998 | 0.062 | 0.252 | 8.56E-06 | 16 |
| MINOS1.5    | 4.08E-10 | -0.616852107 | 0.171 | 0.389 | 9.38E-06 | 16 |
| SDCBP.13    | 4.29E-10 | -0.563079601 | 0.156 | 0.376 | 9.85E-06 | 16 |
| SNRPG.4     | 4.60E-10 | -0.619119593 | 0.147 | 0.361 | 1.06E-05 | 16 |
| ROCK1.9     | 4.74E-10 | -0.645797452 | 0.128 | 0.334 | 1.09E-05 | 16 |
| RANBP1.2    | 4.92E-10 | -0.559534154 | 0.076 | 0.272 | 1.13E-05 | 16 |
| GCC2.10     | 5.04E-10 | -0.744947065 | 0.147 | 0.363 | 1.16E-05 | 16 |
| IDS.11      | 5.10E-10 | -0.677967748 | 0.161 | 0.376 | 1.17E-05 | 16 |
| PCBP1.4     | 5.38E-10 | -0.606662471 | 0.204 | 0.422 | 1.24E-05 | 16 |
| NDUFC1.11   | 6.44E-10 | -1.177936605 | 0.085 | 0.274 | 1.48E-05 | 16 |



|             |          |              |       |       |             |    |
|-------------|----------|--------------|-------|-------|-------------|----|
| CSTB.9      | 6.59E-10 | -0.619827618 | 0.18  | 0.401 | 1.51E-05    | 16 |
| BIN2.11     | 6.68E-10 | -0.579095334 | 0.062 | 0.252 | 1.53E-05    | 16 |
| NDUFA13.4   | 6.78E-10 | -0.502666681 | 0.227 | 0.454 | 1.56E-05    | 16 |
| DHRS7.7     | 6.90E-10 | -0.77114685  | 0.095 | 0.278 | 1.59E-05    | 16 |
| SEC11A.7    | 6.95E-10 | -0.629070549 | 0.142 | 0.342 | 1.60E-05    | 16 |
| DDX24.12    | 7.24E-10 | -0.523658371 | 0.237 | 0.46  | 1.66E-05    | 16 |
| MGST3.12    | 7.71E-10 | -0.813165863 | 0.114 | 0.309 | 1.77E-05    | 16 |
| FKBP1A.10   | 8.31E-10 | -0.675424802 | 0.194 | 0.416 | 1.91E-05    | 16 |
| HCLS1.10    | 8.75E-10 | -0.668697603 | 0.133 | 0.325 | 2.01E-05    | 16 |
| CALM3.6     | 9.02E-10 | -0.586443775 | 0.109 | 0.316 | 2.07E-05    | 16 |
| LGALS1.7    | 9.34E-10 | -0.949029409 | 0.365 | 0.575 | 2.15E-05    | 16 |
| C9orf78.7   | 9.40E-10 | -0.537104516 | 0.076 | 0.268 | 2.16E-05    | 16 |
| DNAJC8.2    | 9.71E-10 | -0.714758723 | 0.104 | 0.299 | 2.23E-05    | 16 |
| KTN1.9      | 1.01E-09 | -0.539179785 | 0.171 | 0.386 | 2.31E-05    | 16 |
| RPS27L.9    | 1.06E-09 | -0.599539827 | 0.242 | 0.476 | 2.44E-05    | 16 |
| ACTR2.8     | 1.13E-09 | -0.728491372 | 0.166 | 0.37  | 2.61E-05    | 16 |
| PPP2R5C.12  | 1.15E-09 | -0.659351927 | 0.175 | 0.393 | 2.64E-05    | 16 |
| CIB1.2      | 1.22E-09 | -0.527917189 | 0.175 | 0.391 | 2.80E-05    | 16 |
| HMGN1.4     | 1.22E-09 | -0.509944587 | 0.289 | 0.507 | 2.81E-05    | 16 |
| DYNLL1.8    | 1.37E-09 | -0.561222358 | 0.204 | 0.412 | 3.14E-05    | 16 |
| DNAJA1.6    | 1.39E-09 | -0.709807735 | 0.133 | 0.335 | 3.20E-05    | 16 |
| SAP18.3     | 1.40E-09 | -0.505076079 | 0.237 | 0.465 | 3.21E-05    | 16 |
| SSBP1.3     | 1.46E-09 | -0.703095658 | 0.1   | 0.296 | 3.36E-05    | 16 |
| SH3GLB1.6   | 1.51E-09 | -0.589425325 | 0.085 | 0.271 | 3.46E-05    | 16 |
| EIF3H.3     | 1.59E-09 | -0.521060185 | 0.232 | 0.454 | 3.66E-05    | 16 |
| CST3.15     | 1.85E-09 | -1.407274941 | 0.199 | 0.388 | 4.24E-05    | 16 |
| VPS28.1     | 1.94E-09 | -0.627446232 | 0.147 | 0.349 | 4.46E-05    | 16 |
| AHNAK.6     | 1.99E-09 | -0.563574715 | 0.104 | 0.297 | 4.57E-05    | 16 |
| SRI.3       | 2.13E-09 | -0.764699914 | 0.133 | 0.323 | 4.89E-05    | 16 |
| CHURC1.7    | 2.16E-09 | -0.635465651 | 0.085 | 0.275 | 4.96E-05    | 16 |
| GNAI2.11    | 2.25E-09 | -0.626213158 | 0.081 | 0.263 | 5.18E-05    | 16 |
| NDUFB9.3    | 2.27E-09 | -0.603642986 | 0.137 | 0.335 | 5.21E-05    | 16 |
| BUB3.11     | 2.27E-09 | -0.829927084 | 0.095 | 0.274 | 5.21E-05    | 16 |
| RNF149.12   | 2.27E-09 | -0.542349398 | 0.085 | 0.272 | 5.21E-05    | 16 |
| C14orf166.4 | 2.57E-09 | -0.56714752  | 0.133 | 0.335 | 5.91E-05    | 16 |
| LSP1.15     | 2.65E-09 | -0.608252488 | 0.232 | 0.437 | 6.10E-05    | 16 |
| DDX3X.12    | 2.67E-09 | -0.671225914 | 0.209 | 0.418 | 6.12E-05    | 16 |
| PSMA4.4     | 2.74E-09 | -0.725681288 | 0.128 | 0.327 | 6.30E-05    | 16 |
| ROMO1.7     | 2.90E-09 | -0.740754388 | 0.123 | 0.314 | 6.65E-05    | 16 |
| IQGAP1.8    | 2.98E-09 | -0.608528485 | 0.142 | 0.341 | 6.84E-05    | 16 |
| NCL.6       | 3.03E-09 | -0.518794982 | 0.223 | 0.434 | 6.97E-05    | 16 |
| RWDD1.1     | 3.57E-09 | -0.613925622 | 0.1   | 0.285 | 8.21E-05    | 16 |
| TBCA.8      | 3.69E-09 | -0.703294188 | 0.204 | 0.406 | 8.49E-05    | 16 |
| ATP5J.9     | 3.89E-09 | -0.504882023 | 0.185 | 0.398 | 8.95E-05    | 16 |
| TCF25.5     | 3.97E-09 | -0.500898728 | 0.199 | 0.417 | 9.12E-05    | 16 |
| SRSF11.6    | 4.01E-09 | -0.602811131 | 0.171 | 0.379 | 9.22E-05    | 16 |
| ANXA5.10    | 4.10E-09 | -0.779726401 | 0.166 | 0.355 | 9.42E-05    | 16 |
| NKTR.11     | 4.13E-09 | -0.58488827  | 0.147 | 0.35  | 9.50E-05    | 16 |
| TUBA1B.10   | 4.28E-09 | -0.665361687 | 0.227 | 0.417 | 9.83E-05    | 16 |
| TMEM219.8   | 4.85E-09 | -0.675162275 | 0.095 | 0.273 | 0.000111525 | 16 |
| RBM8A.3     | 4.92E-09 | -0.711939715 | 0.171 | 0.372 | 0.000113122 | 16 |
| STAT3.11    | 4.95E-09 | -0.572421969 | 0.128 | 0.321 | 0.000113805 | 16 |
| SRP9.2      | 4.97E-09 | -0.630111621 | 0.128 | 0.315 | 0.000114277 | 16 |
| LY6E.8      | 5.66E-09 | -0.666115997 | 0.175 | 0.368 | 0.000130133 | 16 |
| DDX46.5     | 5.81E-09 | -0.526120699 | 0.123 | 0.318 | 0.000133621 | 16 |
| APOC1.13    | 5.85E-09 | -1.937670704 | 0.114 | 0.286 | 0.000134333 | 16 |
| PRRC2C.9    | 6.14E-09 | -0.519402596 | 0.218 | 0.437 | 0.00014107  | 16 |
| ANP32B.5    | 6.33E-09 | -0.575188404 | 0.147 | 0.344 | 0.000145542 | 16 |

|              |          |              |       |       |             |    |
|--------------|----------|--------------|-------|-------|-------------|----|
| IFI27L2.4    | 6.64E-09 | -0.517016723 | 0.118 | 0.309 | 0.000152635 | 16 |
| POMP.8       | 7.05E-09 | -0.579087952 | 0.237 | 0.452 | 0.000162098 | 16 |
| ATP5F1.4     | 7.18E-09 | -0.561667737 | 0.123 | 0.309 | 0.000164915 | 16 |
| NDUFB4.11    | 7.24E-09 | -0.598054587 | 0.213 | 0.414 | 0.000166361 | 16 |
| CD63.13      | 9.60E-09 | -0.528902189 | 0.294 | 0.523 | 0.000220643 | 16 |
| FIS1.3       | 9.84E-09 | -0.5058962   | 0.128 | 0.312 | 0.000226184 | 16 |
| PRDX1.10     | 1.05E-08 | -0.579536579 | 0.204 | 0.407 | 0.00024095  | 16 |
| ATP6V0E1.9   | 1.07E-08 | -0.50722838  | 0.313 | 0.521 | 0.000245219 | 16 |
| PGAM1.8      | 1.12E-08 | -0.565331341 | 0.166 | 0.364 | 0.000256303 | 16 |
| COX14.2      | 1.16E-08 | -0.688377462 | 0.1   | 0.277 | 0.000266414 | 16 |
| TGOLN2.5     | 1.16E-08 | -0.546496088 | 0.085 | 0.264 | 0.000266763 | 16 |
| DNAJB6.4     | 1.21E-08 | -0.509041817 | 0.147 | 0.343 | 0.000277946 | 16 |
| SFPQ.7       | 1.24E-08 | -0.566696184 | 0.128 | 0.314 | 0.000286093 | 16 |
| MT1X.10      | 1.39E-08 | -1.896349237 | 0.109 | 0.286 | 0.000318397 | 16 |
| LAPTM4A.11   | 1.44E-08 | -0.687940202 | 0.161 | 0.355 | 0.000331889 | 16 |
| CMC1.14      | 1.46E-08 | -1.220173239 | 0.114 | 0.287 | 0.000335239 | 16 |
| RNF7.3       | 1.49E-08 | -0.564116035 | 0.1   | 0.273 | 0.000343175 | 16 |
| WSB1.7       | 1.88E-08 | -0.529299147 | 0.175 | 0.363 | 0.000431404 | 16 |
| HMGN3.4      | 1.96E-08 | -0.55768789  | 0.128 | 0.308 | 0.000451173 | 16 |
| ARID4B.12    | 2.06E-08 | -0.549724577 | 0.161 | 0.343 | 0.00047406  | 16 |
| HNRNPM.2     | 2.20E-08 | -0.609734312 | 0.133 | 0.322 | 0.000504912 | 16 |
| SF3B2.7      | 2.22E-08 | -0.665906041 | 0.137 | 0.318 | 0.00050963  | 16 |
| DDX17.9      | 2.54E-08 | -0.678792645 | 0.204 | 0.402 | 0.000583502 | 16 |
| PRELID1.5    | 2.72E-08 | -0.53706293  | 0.166 | 0.359 | 0.000625637 | 16 |
| CDC37.6      | 2.79E-08 | -0.652345236 | 0.133 | 0.311 | 0.000641354 | 16 |
| DSTN.13      | 2.93E-08 | -0.773853499 | 0.128 | 0.31  | 0.00067422  | 16 |
| RNF181.7     | 2.95E-08 | -0.810073331 | 0.104 | 0.273 | 0.000678839 | 16 |
| APLP2.13     | 3.05E-08 | -0.740065989 | 0.09  | 0.258 | 0.000701288 | 16 |
| YWHAE.10     | 3.24E-08 | -0.71910668  | 0.142 | 0.315 | 0.00074365  | 16 |
| ACAP1.16     | 3.27E-08 | -0.726989383 | 0.161 | 0.336 | 0.000751842 | 16 |
| GYPC.11      | 3.29E-08 | -0.618764065 | 0.133 | 0.309 | 0.000754967 | 16 |
| CCT8.5       | 3.58E-08 | -0.58302343  | 0.095 | 0.264 | 0.000823011 | 16 |
| NDUFB5.7     | 3.62E-08 | -0.696301796 | 0.09  | 0.251 | 0.000830799 | 16 |
| PCSK7.14     | 4.46E-08 | -0.588848773 | 0.142 | 0.323 | 0.001024951 | 16 |
| UBC.7        | 4.51E-08 | -0.508018512 | 0.664 | 0.843 | 0.00103537  | 16 |
| ACTR3.6      | 5.50E-08 | -0.604476412 | 0.194 | 0.385 | 0.001263422 | 16 |
| ENY2.5       | 6.54E-08 | -0.556740637 | 0.128 | 0.307 | 0.00150404  | 16 |
| SSB.1        | 7.09E-08 | -0.562013062 | 0.104 | 0.27  | 0.0016298   | 16 |
| ZFP36.10     | 7.12E-08 | -0.736035217 | 0.479 | 0.666 | 0.001635386 | 16 |
| ZFP36L2.13   | 7.57E-08 | -0.718621389 | 0.536 | 0.701 | 0.001739794 | 16 |
| C1QA.13      | 8.19E-08 | -1.847837794 | 0.104 | 0.252 | 0.001882585 | 16 |
| ATP1B3.12    | 8.50E-08 | -0.55118964  | 0.1   | 0.271 | 0.001953402 | 16 |
| AC090498.1.9 | 9.43E-08 | -0.540822388 | 0.299 | 0.504 | 0.002166315 | 16 |
| PHPT1.8      | 9.82E-08 | -0.591493251 | 0.114 | 0.278 | 0.002257523 | 16 |
| EIF3A.8      | 9.93E-08 | -0.543561442 | 0.128 | 0.301 | 0.002282165 | 16 |
| MT-ND4L.9    | 1.05E-07 | -0.57699503  | 0.185 | 0.363 | 0.002418914 | 16 |
| ARHGDIA.2    | 1.17E-07 | -0.515946278 | 0.118 | 0.288 | 0.00268286  | 16 |
| PPP1R2.9     | 1.29E-07 | -0.630690423 | 0.171 | 0.345 | 0.002953213 | 16 |
| TAOK3.9      | 1.63E-07 | -0.603445566 | 0.104 | 0.268 | 0.003747418 | 16 |
| KHDRBS1.1    | 1.71E-07 | -0.619865585 | 0.128 | 0.296 | 0.003920667 | 16 |
| ATP5B.3      | 1.74E-07 | -0.50912274  | 0.19  | 0.372 | 0.003988913 | 16 |
| RHOB.13      | 1.75E-07 | -0.705877295 | 0.185 | 0.351 | 0.004018527 | 16 |
| NFE2L2.11    | 1.89E-07 | -0.532061328 | 0.104 | 0.266 | 0.004337231 | 16 |
| SRRM2.6      | 2.01E-07 | -0.578322926 | 0.171 | 0.344 | 0.004614217 | 16 |
| STK4.12      | 2.16E-07 | -0.654045662 | 0.289 | 0.475 | 0.004959635 | 16 |
| RNF19A.13    | 2.17E-07 | -0.619185407 | 0.118 | 0.279 | 0.004996233 | 16 |
| RHOG.9       | 2.21E-07 | -0.570014205 | 0.104 | 0.266 | 0.005068893 | 16 |
| POLR1D.2     | 2.23E-07 | -0.506127788 | 0.123 | 0.294 | 0.005114694 | 16 |

|             |          |              |       |       |             |    |
|-------------|----------|--------------|-------|-------|-------------|----|
| RNH1.7      | 2.30E-07 | -0.515905309 | 0.114 | 0.273 | 0.005276333 | 16 |
| SF3B6.6     | 2.58E-07 | -0.708244955 | 0.142 | 0.308 | 0.005931208 | 16 |
| NCOR1.10    | 2.92E-07 | -0.525948725 | 0.175 | 0.35  | 0.006709539 | 16 |
| TAGLN2.11   | 3.09E-07 | -0.542224299 | 0.185 | 0.359 | 0.007095909 | 16 |
| MZT2B.6     | 3.35E-07 | -0.570020777 | 0.19  | 0.364 | 0.007704948 | 16 |
| HERPUD1.11  | 3.71E-07 | 0.830366875  | 0.573 | 0.491 | 0.008532052 | 16 |
| LAMTOR5.9   | 4.20E-07 | -0.600862615 | 0.18  | 0.348 | 0.009649032 | 16 |
| PDCD4.7     | 4.33E-07 | -0.619399308 | 0.147 | 0.306 | 0.009947643 | 16 |
| C9orf142.11 | 5.36E-07 | -0.501545884 | 0.109 | 0.263 | 0.012315117 | 16 |
| PPIG.5      | 5.39E-07 | -0.518613407 | 0.156 | 0.323 | 0.012386747 | 16 |
| TERF2IP.9   | 6.22E-07 | -0.575201341 | 0.199 | 0.367 | 0.014284377 | 16 |
| HSPD1.8     | 6.99E-07 | -0.618619146 | 0.133 | 0.296 | 0.016064152 | 16 |
| NNMT.16     | 7.26E-07 | -1.304813142 | 0.142 | 0.301 | 0.016689846 | 16 |
| ST13.10     | 7.76E-07 | -0.518683937 | 0.194 | 0.375 | 0.017838875 | 16 |
| TMEM256.5   | 7.90E-07 | -0.543428948 | 0.109 | 0.256 | 0.018152997 | 16 |
| CRIP1.12    | 8.00E-07 | -0.722878473 | 0.137 | 0.296 | 0.018383006 | 16 |
| UBXN1.4     | 9.97E-07 | -0.53249558  | 0.223 | 0.394 | 0.022902235 | 16 |
| CRYAB.15    | 1.14E-06 | -1.516778238 | 0.118 | 0.261 | 0.026153055 | 16 |
| XIST.10     | 1.15E-06 | -0.613741783 | 0.265 | 0.426 | 0.026442289 | 16 |
| NSA2.4      | 1.29E-06 | -0.533750077 | 0.142 | 0.299 | 0.029628114 | 16 |
| PNN.8       | 1.51E-06 | -0.505066112 | 0.152 | 0.306 | 0.034809568 | 16 |
| EIF1B.1     | 1.65E-06 | -0.507379881 | 0.109 | 0.258 | 0.037859288 | 16 |
| SQSTM1.4    | 1.80E-06 | -0.529729011 | 0.161 | 0.316 | 0.041257548 | 16 |
| SERPINA1.15 | 2.10E-06 | -0.880013162 | 0.133 | 0.281 | 0.048288754 | 16 |
| RGS5.2      | 0        | 5.206489268  | 1     | 0.114 | 0           | 17 |
| ACTA2.1     | 0        | 4.897818295  | 0.979 | 0.123 | 0           | 17 |
| TAGLN       | 0        | 4.539159406  | 0.927 | 0.057 | 0           | 17 |
| BGN         | 0        | 4.092446201  | 0.984 | 0.052 | 0           | 17 |
| CALD1.2     | 0        | 4.073561124  | 1     | 0.137 | 0           | 17 |
| MYL9        | 0        | 3.971307016  | 0.969 | 0.064 | 0           | 17 |
| TPM2        | 0        | 3.692570098  | 0.984 | 0.042 | 0           | 17 |
| CPE         | 0        | 3.603918585  | 0.948 | 0.028 | 0           | 17 |
| GJA4        | 0        | 3.546065835  | 0.964 | 0.023 | 0           | 17 |
| FRZB        | 0        | 3.449433493  | 0.938 | 0.014 | 0           | 17 |
| PLAC9       | 0        | 3.189027422  | 0.922 | 0.02  | 0           | 17 |
| PDGFRB      | 0        | 3.176409679  | 0.917 | 0.011 | 0           | 17 |
| MAP1B       | 0        | 3.144352988  | 0.927 | 0.023 | 0           | 17 |
| CD36.1      | 0        | 3.143260366  | 0.881 | 0.041 | 0           | 17 |
| THY1        | 0        | 3.073046674  | 0.855 | 0.035 | 0           | 17 |
| RASD1       | 0        | 2.896172168  | 0.751 | 0.027 | 0           | 17 |
| PLN         | 0        | 2.855506822  | 0.85  | 0.009 | 0           | 17 |
| COL6A2      | 0        | 2.819245561  | 0.902 | 0.023 | 0           | 17 |
| TINAGL1.2   | 0        | 2.675560286  | 0.896 | 0.042 | 0           | 17 |
| LHFP.1      | 0        | 2.654349398  | 0.902 | 0.039 | 0           | 17 |
| MYLK        | 0        | 2.599116818  | 0.85  | 0.029 | 0           | 17 |
| SOD3        | 0        | 2.59347892   | 0.803 | 0.021 | 0           | 17 |
| COL1A2      | 0        | 2.520667401  | 0.741 | 0.014 | 0           | 17 |
| COL18A1.1   | 0        | 2.432551365  | 0.798 | 0.061 | 0           | 17 |
| MFGE8       | 0        | 2.416483583  | 0.834 | 0.046 | 0           | 17 |
| MYH11       | 0        | 2.411021464  | 0.71  | 0.015 | 0           | 17 |
| PGF.1       | 0        | 2.406614579  | 0.86  | 0.042 | 0           | 17 |
| TPPP3       | 0        | 2.353712119  | 0.777 | 0.017 | 0           | 17 |
| ID1.1       | 0        | 2.34366488   | 0.777 | 0.06  | 0           | 17 |
| MCAM.1      | 0        | 2.342860869  | 0.741 | 0.043 | 0           | 17 |
| FABP4       | 0        | 2.340438159  | 0.404 | 0.007 | 0           | 17 |
| CYGB        | 0        | 2.30870794   | 0.741 | 0.007 | 0           | 17 |
| COX4I2      | 0        | 2.300493674  | 0.736 | 0.011 | 0           | 17 |
| COL4A2.1    | 0        | 2.277991987  | 0.798 | 0.052 | 0           | 17 |

|            |   |             |       |       |   |    |
|------------|---|-------------|-------|-------|---|----|
| PPP1R14A   | 0 | 2.210010217 | 0.601 | 0.015 | 0 | 17 |
| EPS8.2     | 0 | 2.193731463 | 0.808 | 0.068 | 0 | 17 |
| KCNE4      | 0 | 2.164617157 | 0.746 | 0.006 | 0 | 17 |
| PALLD.1    | 0 | 2.071616991 | 0.746 | 0.049 | 0 | 17 |
| NOTCH3     | 0 | 2.04204238  | 0.731 | 0.008 | 0 | 17 |
| CSRP2      | 0 | 1.99602543  | 0.679 | 0.018 | 0 | 17 |
| KCNJ8      | 0 | 1.930303378 | 0.658 | 0.003 | 0 | 17 |
| TGFB1I1    | 0 | 1.916564302 | 0.746 | 0.019 | 0 | 17 |
| HIGD1B     | 0 | 1.9029943   | 0.596 | 0.006 | 0 | 17 |
| GJC1       | 0 | 1.837592018 | 0.705 | 0.007 | 0 | 17 |
| COL6A1     | 0 | 1.819529059 | 0.622 | 0.016 | 0 | 17 |
| FILIP1.1   | 0 | 1.807401364 | 0.699 | 0.03  | 0 | 17 |
| CRISPLD2   | 0 | 1.805886444 | 0.596 | 0.01  | 0 | 17 |
| KANK2      | 0 | 1.786747998 | 0.674 | 0.024 | 0 | 17 |
| DKK3.1     | 0 | 1.755568982 | 0.736 | 0.042 | 0 | 17 |
| NR2F2      | 0 | 1.755372047 | 0.689 | 0.02  | 0 | 17 |
| CLMN       | 0 | 1.753022818 | 0.674 | 0.019 | 0 | 17 |
| EBF1       | 0 | 1.717768506 | 0.668 | 0.008 | 0 | 17 |
| S1PR3      | 0 | 1.715062587 | 0.658 | 0.012 | 0 | 17 |
| KLHL23     | 0 | 1.705946942 | 0.658 | 0.007 | 0 | 17 |
| PLS3.1     | 0 | 1.687231171 | 0.663 | 0.027 | 0 | 17 |
| MYO1B.1    | 0 | 1.687201037 | 0.632 | 0.024 | 0 | 17 |
| COL3A1     | 0 | 1.666414381 | 0.549 | 0.013 | 0 | 17 |
| VCL        | 0 | 1.661811399 | 0.674 | 0.043 | 0 | 17 |
| C11orf96   | 0 | 1.652707899 | 0.637 | 0.011 | 0 | 17 |
| FXVD6      | 0 | 1.637873168 | 0.653 | 0.017 | 0 | 17 |
| COX7A1.1   | 0 | 1.63504864  | 0.756 | 0.059 | 0 | 17 |
| NES        | 0 | 1.626205647 | 0.611 | 0.011 | 0 | 17 |
| 4-Sep      | 0 | 1.60846715  | 0.575 | 0.013 | 0 | 17 |
| PLXDC1     | 0 | 1.599985572 | 0.606 | 0.025 | 0 | 17 |
| CCDC102B   | 0 | 1.593177592 | 0.549 | 0.013 | 0 | 17 |
| NEXN       | 0 | 1.56750035  | 0.57  | 0.007 | 0 | 17 |
| CARMN      | 0 | 1.556797181 | 0.513 | 0.006 | 0 | 17 |
| JAG1.1     | 0 | 1.556222102 | 0.622 | 0.04  | 0 | 17 |
| TMEM47.1   | 0 | 1.533919091 | 0.627 | 0.036 | 0 | 17 |
| TBX2       | 0 | 1.519058746 | 0.544 | 0.006 | 0 | 17 |
| ID4        | 0 | 1.515312047 | 0.508 | 0.003 | 0 | 17 |
| AC013461.1 | 0 | 1.510588443 | 0.632 | 0.038 | 0 | 17 |
| GUCY1A3    | 0 | 1.507507464 | 0.591 | 0.019 | 0 | 17 |
| KCNAB1     | 0 | 1.457747793 | 0.575 | 0.004 | 0 | 17 |
| CDH6       | 0 | 1.431261446 | 0.611 | 0.026 | 0 | 17 |
| ADAMTS1    | 0 | 1.429955372 | 0.477 | 0.022 | 0 | 17 |
| SSTR2      | 0 | 1.427217766 | 0.482 | 0.013 | 0 | 17 |
| VASN       | 0 | 1.397218858 | 0.503 | 0.01  | 0 | 17 |
| AKAP12.1   | 0 | 1.377505081 | 0.653 | 0.037 | 0 | 17 |
| SLC38A11   | 0 | 1.365664257 | 0.492 | 0.002 | 0 | 17 |
| PARM1      | 0 | 1.347443027 | 0.544 | 0.006 | 0 | 17 |
| CNN1       | 0 | 1.341827947 | 0.301 | 0.003 | 0 | 17 |
| EFHD1      | 0 | 1.340054843 | 0.528 | 0.005 | 0 | 17 |
| OLFML2A    | 0 | 1.335882875 | 0.534 | 0.01  | 0 | 17 |
| PTK2.1     | 0 | 1.313301183 | 0.585 | 0.035 | 0 | 17 |
| DLC1       | 0 | 1.289268892 | 0.513 | 0.016 | 0 | 17 |
| SLIT3      | 0 | 1.286876427 | 0.508 | 0.005 | 0 | 17 |
| PTN        | 0 | 1.285047087 | 0.409 | 0.003 | 0 | 17 |
| CHST2      | 0 | 1.27195337  | 0.575 | 0.028 | 0 | 17 |
| FRMD3      | 0 | 1.269986456 | 0.513 | 0.019 | 0 | 17 |
| RCAN2      | 0 | 1.244792803 | 0.513 | 0.021 | 0 | 17 |
| GPRC5C.1   | 0 | 1.244103142 | 0.539 | 0.025 | 0 | 17 |

|           |   |             |       |       |   |    |
|-----------|---|-------------|-------|-------|---|----|
| ADGRF5.1  | 0 | 1.237855786 | 0.617 | 0.036 | 0 | 17 |
| CSPG4     | 0 | 1.222404785 | 0.466 | 0.007 | 0 | 17 |
| GUCY1B3   | 0 | 1.220959488 | 0.466 | 0.011 | 0 | 17 |
| AGTR1     | 0 | 1.211387819 | 0.347 | 0.001 | 0 | 17 |
| HOXC9     | 0 | 1.199340515 | 0.497 | 0.01  | 0 | 17 |
| FHL5      | 0 | 1.166387109 | 0.378 | 0.002 | 0 | 17 |
| FOXS1     | 0 | 1.162295644 | 0.451 | 0.002 | 0 | 17 |
| RERG.1    | 0 | 1.146782658 | 0.503 | 0.021 | 0 | 17 |
| DAAM2     | 0 | 1.144068261 | 0.456 | 0.007 | 0 | 17 |
| HEYL      | 0 | 1.078787855 | 0.44  | 0.005 | 0 | 17 |
| MSRB3     | 0 | 1.067456727 | 0.44  | 0.014 | 0 | 17 |
| FOXC2     | 0 | 1.051083272 | 0.43  | 0.003 | 0 | 17 |
| LGI4      | 0 | 1.050558943 | 0.409 | 0.005 | 0 | 17 |
| NFASC     | 0 | 1.046725429 | 0.415 | 0.004 | 0 | 17 |
| COL5A2    | 0 | 1.031097787 | 0.399 | 0.005 | 0 | 17 |
| NGFR      | 0 | 1.013221444 | 0.332 | 0.003 | 0 | 17 |
| ARHGEF17  | 0 | 0.996812876 | 0.42  | 0.011 | 0 | 17 |
| MOCS1     | 0 | 0.976446346 | 0.394 | 0.007 | 0 | 17 |
| ACAN      | 0 | 0.963929882 | 0.347 | 0.002 | 0 | 17 |
| PRRX1     | 0 | 0.963658329 | 0.347 | 0.001 | 0 | 17 |
| LMOD1     | 0 | 0.956054332 | 0.368 | 0.002 | 0 | 17 |
| RGL3      | 0 | 0.95167115  | 0.373 | 0.011 | 0 | 17 |
| RBP1      | 0 | 0.948045782 | 0.399 | 0.013 | 0 | 17 |
| C1QTNF1   | 0 | 0.946380185 | 0.378 | 0.006 | 0 | 17 |
| MAP2      | 0 | 0.938656823 | 0.358 | 0.006 | 0 | 17 |
| SELENBP1  | 0 | 0.934526142 | 0.337 | 0.007 | 0 | 17 |
| PTGIR     | 0 | 0.930743409 | 0.378 | 0.009 | 0 | 17 |
| ABCC9     | 0 | 0.918117038 | 0.378 | 0.001 | 0 | 17 |
| NGF       | 0 | 0.917679484 | 0.358 | 0.001 | 0 | 17 |
| SYDE1     | 0 | 0.915362752 | 0.409 | 0.009 | 0 | 17 |
| NDN       | 0 | 0.912285478 | 0.368 | 0.012 | 0 | 17 |
| LRRC17    | 0 | 0.903607335 | 0.29  | 0.002 | 0 | 17 |
| SMOC2     | 0 | 0.864449076 | 0.285 | 0.002 | 0 | 17 |
| SLC7A2    | 0 | 0.856534059 | 0.326 | 0.002 | 0 | 17 |
| NR2F2-AS1 | 0 | 0.854766674 | 0.373 | 0.011 | 0 | 17 |
| RASL12    | 0 | 0.845223508 | 0.332 | 0.001 | 0 | 17 |
| PDGFA     | 0 | 0.842768    | 0.347 | 0.011 | 0 | 17 |
| GUCY1A2   | 0 | 0.83939728  | 0.358 | 0.001 | 0 | 17 |
| LURAP1L   | 0 | 0.837106685 | 0.332 | 0.009 | 0 | 17 |
| PRKG1     | 0 | 0.819124559 | 0.332 | 0.002 | 0 | 17 |
| TCF21     | 0 | 0.816452669 | 0.259 | 0.001 | 0 | 17 |
| MRVI1     | 0 | 0.80816351  | 0.368 | 0.005 | 0 | 17 |
| C9orf47   | 0 | 0.806833054 | 0.285 | 0.001 | 0 | 17 |
| PDE5A     | 0 | 0.804290826 | 0.311 | 0.002 | 0 | 17 |
| TBX2-AS1  | 0 | 0.801009188 | 0.347 | 0.002 | 0 | 17 |
| LZTS1     | 0 | 0.795024743 | 0.352 | 0.004 | 0 | 17 |
| ITGA7     | 0 | 0.77720912  | 0.295 | 0.003 | 0 | 17 |
| FBLN1     | 0 | 0.773763491 | 0.285 | 0.001 | 0 | 17 |
| SGIP1     | 0 | 0.762322625 | 0.254 | 0.005 | 0 | 17 |
| CCDC3     | 0 | 0.760020223 | 0.306 | 0.004 | 0 | 17 |
| GPR176    | 0 | 0.757197139 | 0.306 | 0.003 | 0 | 17 |
| EDNRA     | 0 | 0.746767413 | 0.254 | 0.002 | 0 | 17 |
| DDR2      | 0 | 0.736069529 | 0.295 | 0.004 | 0 | 17 |
| TBX3      | 0 | 0.731256154 | 0.259 | 0.001 | 0 | 17 |
| ECM1      | 0 | 0.722761358 | 0.29  | 0.004 | 0 | 17 |
| ANO1      | 0 | 0.715251902 | 0.28  | 0.001 | 0 | 17 |
| CD248     | 0 | 0.700431626 | 0.264 | 0.004 | 0 | 17 |
| HTR1F     | 0 | 0.700358969 | 0.311 | 0.002 | 0 | 17 |

|            |           |             |       |       |           |    |
|------------|-----------|-------------|-------|-------|-----------|----|
| SEMA5A     | 0         | 0.699227597 | 0.321 | 0.003 | 0         | 17 |
| HEY2       | 0         | 0.689709627 | 0.316 | 0.005 | 0         | 17 |
| TUSC3      | 0         | 0.685331291 | 0.311 | 0.007 | 0         | 17 |
| ANGPT1     | 0         | 0.665576994 | 0.269 | 0.003 | 0         | 17 |
| ADGRA2     | 0         | 0.658365804 | 0.285 | 0.005 | 0         | 17 |
| EBF2       | 0         | 0.649023623 | 0.28  | 0.001 | 0         | 17 |
| ECM2       | 0         | 0.646073797 | 0.259 | 0.002 | 0         | 17 |
| PRR16      | 0         | 0.631969132 | 0.259 | 0.002 | 0         | 17 |
| NEURL1B    | 0         | 0.624543335 | 0.285 | 0.004 | 0         | 17 |
| PDE1A      | 0         | 0.620511563 | 0.254 | 0.002 | 0         | 17 |
| FAM162B    | 0         | 0.616597545 | 0.264 | 0.001 | 0         | 17 |
| RNF180     | 0         | 0.613220856 | 0.275 | 0.004 | 0         | 17 |
| ISYNA1     | 1.57E-307 | 1.225273137 | 0.482 | 0.023 | 3.62E-303 | 17 |
| EPB41L1    | 3.22E-307 | 0.70388595  | 0.29  | 0.007 | 7.40E-303 | 17 |
| ID3.2      | 2.94E-304 | 3.537491712 | 0.984 | 0.128 | 6.76E-300 | 17 |
| CDC42EP4   | 1.06E-301 | 0.921464491 | 0.415 | 0.017 | 2.44E-297 | 17 |
| COL4A1.1   | 5.38E-300 | 2.250922237 | 0.736 | 0.059 | 1.24E-295 | 17 |
| SNAI2      | 3.94E-297 | 0.666005482 | 0.254 | 0.005 | 9.05E-293 | 17 |
| CAV2.2     | 5.63E-294 | 1.722595208 | 0.767 | 0.067 | 1.29E-289 | 17 |
| CPM.3      | 3.99E-289 | 2.94235123  | 0.948 | 0.125 | 9.16E-285 | 17 |
| MGP.3      | 6.13E-288 | 3.703695021 | 0.995 | 0.138 | 1.41E-283 | 17 |
| SCGN       | 6.88E-286 | 1.117670734 | 0.301 | 0.009 | 1.58E-281 | 17 |
| CNN3.4     | 3.22E-283 | 2.01948805  | 0.896 | 0.097 | 7.39E-279 | 17 |
| ACTN1.1    | 9.46E-283 | 1.909659844 | 0.762 | 0.073 | 2.17E-278 | 17 |
| LGALS3BP.2 | 2.29E-282 | 2.285315464 | 0.834 | 0.092 | 5.25E-278 | 17 |
| FILIP1L.2  | 2.78E-282 | 1.954920183 | 0.746 | 0.07  | 6.40E-278 | 17 |
| PCOLCE     | 9.50E-267 | 0.87682072  | 0.337 | 0.012 | 2.18E-262 | 17 |
| CSRP1      | 2.77E-265 | 2.31253275  | 0.824 | 0.094 | 6.37E-261 | 17 |
| FERMT2.1   | 8.01E-264 | 1.106851099 | 0.497 | 0.03  | 1.84E-259 | 17 |
| ENAH       | 6.97E-261 | 0.830247694 | 0.358 | 0.015 | 1.60E-256 | 17 |
| PARVA      | 3.99E-256 | 0.823023152 | 0.399 | 0.019 | 9.18E-252 | 17 |
| HES4.1     | 2.71E-252 | 1.151618694 | 0.56  | 0.039 | 6.23E-248 | 17 |
| EPAS1.3    | 8.85E-250 | 1.752416053 | 0.891 | 0.104 | 2.03E-245 | 17 |
| UACA.1     | 1.51E-249 | 1.713194146 | 0.679 | 0.062 | 3.47E-245 | 17 |
| PTPRG.1    | 3.27E-247 | 1.075370306 | 0.466 | 0.027 | 7.51E-243 | 17 |
| PHLDA1.1   | 7.36E-247 | 2.488728425 | 0.943 | 0.136 | 1.69E-242 | 17 |
| RBMS3.1    | 5.34E-245 | 0.916339035 | 0.435 | 0.024 | 1.23E-240 | 17 |
| MAP3K7CL.1 | 1.82E-244 | 1.547276099 | 0.539 | 0.038 | 4.17E-240 | 17 |
| ANTXR1     | 2.83E-244 | 0.650682275 | 0.269 | 0.008 | 6.50E-240 | 17 |
| PLEKHA4    | 1.16E-241 | 0.629515532 | 0.29  | 0.01  | 2.66E-237 | 17 |
| ARHGAP42   | 8.96E-240 | 0.600697732 | 0.29  | 0.01  | 2.06E-235 | 17 |
| TIMP3.2    | 3.07E-239 | 1.505688568 | 0.798 | 0.084 | 7.06E-235 | 17 |
| APBB2      | 1.23E-236 | 0.849247875 | 0.347 | 0.015 | 2.82E-232 | 17 |
| TNS1.2     | 9.85E-236 | 1.161519844 | 0.549 | 0.042 | 2.26E-231 | 17 |
| SLC12A2    | 7.38E-235 | 1.010434176 | 0.435 | 0.025 | 1.70E-230 | 17 |
| PDLIM3     | 1.05E-234 | 0.836247534 | 0.337 | 0.014 | 2.41E-230 | 17 |
| EHD2.2     | 1.15E-234 | 1.150025235 | 0.554 | 0.042 | 2.64E-230 | 17 |
| DCBLD2     | 1.43E-232 | 0.663965865 | 0.28  | 0.01  | 3.29E-228 | 17 |
| TMEM98     | 2.02E-231 | 0.681994421 | 0.337 | 0.015 | 4.65E-227 | 17 |
| SPARCL1.3  | 5.43E-230 | 2.173011    | 1     | 0.152 | 1.25E-225 | 17 |
| ADAMTS4    | 3.50E-225 | 0.880012895 | 0.321 | 0.014 | 8.05E-221 | 17 |
| IGFBP5     | 1.17E-224 | 1.445563294 | 0.409 | 0.023 | 2.69E-220 | 17 |
| LAMB2.1    | 3.03E-223 | 1.088052267 | 0.508 | 0.037 | 6.96E-219 | 17 |
| FAT1       | 4.19E-221 | 0.627891595 | 0.301 | 0.012 | 9.62E-217 | 17 |
| ENPEP.1    | 1.84E-220 | 1.025525752 | 0.461 | 0.031 | 4.22E-216 | 17 |
| MEIS2      | 4.69E-219 | 0.761109178 | 0.311 | 0.013 | 1.08E-214 | 17 |
| CDC42BPA.1 | 5.28E-218 | 1.107774996 | 0.492 | 0.036 | 1.21E-213 | 17 |
| PMEPA1     | 2.91E-217 | 1.254106412 | 0.492 | 0.036 | 6.68E-213 | 17 |

|            |           |             |       |       |           |    |
|------------|-----------|-------------|-------|-------|-----------|----|
| EDIL3.1    | 1.63E-216 | 0.795004192 | 0.383 | 0.021 | 3.74E-212 | 17 |
| TPM1.4     | 4.40E-214 | 2.789054674 | 0.984 | 0.183 | 1.01E-209 | 17 |
| MT1M       | 3.38E-213 | 0.85397468  | 0.368 | 0.019 | 7.78E-209 | 17 |
| PTPRK.1    | 9.06E-213 | 0.913868862 | 0.451 | 0.03  | 2.08E-208 | 17 |
| PPP1R12B   | 5.67E-212 | 1.132867406 | 0.497 | 0.037 | 1.30E-207 | 17 |
| SPARC.4    | 1.68E-210 | 2.424917046 | 0.99  | 0.171 | 3.86E-206 | 17 |
| SMTN.1     | 1.52E-208 | 0.940787241 | 0.508 | 0.039 | 3.50E-204 | 17 |
| OLFML2B    | 1.08E-207 | 1.145568504 | 0.42  | 0.027 | 2.48E-203 | 17 |
| ITM2C.3    | 9.48E-203 | 2.266359183 | 0.902 | 0.146 | 2.18E-198 | 17 |
| STEAP4     | 2.55E-202 | 0.93483955  | 0.259 | 0.01  | 5.86E-198 | 17 |
| DMD        | 7.61E-197 | 0.588285594 | 0.275 | 0.011 | 1.75E-192 | 17 |
| PTRF.2     | 3.22E-195 | 1.388763877 | 0.668 | 0.073 | 7.39E-191 | 17 |
| PLEKHH3    | 1.42E-193 | 0.644041463 | 0.269 | 0.011 | 3.26E-189 | 17 |
| PPIC.1     | 1.20E-192 | 0.881628267 | 0.404 | 0.027 | 2.76E-188 | 17 |
| COBLL1     | 5.25E-190 | 0.68339794  | 0.311 | 0.016 | 1.21E-185 | 17 |
| NR2F1.1    | 4.44E-189 | 0.682822384 | 0.264 | 0.011 | 1.02E-184 | 17 |
| P2RY14     | 2.96E-187 | 0.752688437 | 0.269 | 0.012 | 6.80E-183 | 17 |
| CAV1.4     | 6.14E-187 | 1.784902846 | 0.86  | 0.127 | 1.41E-182 | 17 |
| SERPING1.2 | 1.15E-186 | 1.768655418 | 0.736 | 0.1   | 2.65E-182 | 17 |
| LIMA1.1    | 5.00E-186 | 1.341582884 | 0.663 | 0.078 | 1.15E-181 | 17 |
| PLAT       | 1.69E-185 | 0.817003023 | 0.342 | 0.019 | 3.88E-181 | 17 |
| IGFBP4.2   | 1.04E-182 | 1.80101815  | 0.772 | 0.108 | 2.40E-178 | 17 |
| TMEM38B    | 3.95E-182 | 1.142034472 | 0.461 | 0.038 | 9.08E-178 | 17 |
| TNS2.1     | 1.90E-180 | 0.99266435  | 0.456 | 0.037 | 4.38E-176 | 17 |
| ADIRF.11   | 1.56E-176 | 3.228127014 | 0.969 | 0.231 | 3.59E-172 | 17 |
| SEPP1.3    | 1.84E-174 | 1.300170416 | 0.813 | 0.121 | 4.23E-170 | 17 |
| SDC2.1     | 5.59E-174 | 1.240687609 | 0.472 | 0.042 | 1.28E-169 | 17 |
| COL1A1     | 2.37E-172 | 1.1299391   | 0.306 | 0.017 | 5.44E-168 | 17 |
| NRP1.1     | 1.70E-171 | 1.038753774 | 0.591 | 0.065 | 3.90E-167 | 17 |
| TMEM204.1  | 2.48E-171 | 1.123883872 | 0.632 | 0.072 | 5.69E-167 | 17 |
| FHL1.1     | 2.83E-169 | 1.014023531 | 0.503 | 0.048 | 6.51E-165 | 17 |
| CLIC4.3    | 6.27E-168 | 1.201021477 | 0.658 | 0.085 | 1.44E-163 | 17 |
| PAWR       | 5.76E-163 | 0.67384215  | 0.316 | 0.019 | 1.32E-158 | 17 |
| NDRG2.2    | 5.99E-163 | 1.217127537 | 0.585 | 0.069 | 1.38E-158 | 17 |
| ESAM.1     | 5.68E-162 | 0.805343977 | 0.554 | 0.057 | 1.31E-157 | 17 |
| CTGF.1     | 2.10E-160 | 1.797763281 | 0.456 | 0.041 | 4.83E-156 | 17 |
| CLEC11A    | 1.47E-158 | 0.86940791  | 0.409 | 0.034 | 3.37E-154 | 17 |
| BCAM.1     | 5.71E-158 | 0.889571147 | 0.554 | 0.06  | 1.31E-153 | 17 |
| ITGA1.1    | 1.49E-157 | 1.54176945  | 0.741 | 0.109 | 3.41E-153 | 17 |
| GSN.5      | 8.71E-157 | 1.928456601 | 0.959 | 0.215 | 2.00E-152 | 17 |
| INPP4B     | 1.01E-156 | 1.185827203 | 0.642 | 0.081 | 2.32E-152 | 17 |
| IGFBP7.14  | 3.22E-154 | 3.809416179 | 1     | 0.37  | 7.40E-150 | 17 |
| PDLIM7     | 5.93E-150 | 1.079352936 | 0.487 | 0.052 | 1.36E-145 | 17 |
| DSTN.14    | 2.36E-149 | 2.480525522 | 0.99  | 0.298 | 5.42E-145 | 17 |
| TPM4.1     | 3.08E-147 | 2.070175465 | 0.87  | 0.204 | 7.07E-143 | 17 |
| FAM213A.2  | 7.48E-147 | 1.317117537 | 0.689 | 0.105 | 1.72E-142 | 17 |
| CRIP2.3    | 5.82E-146 | 0.954811035 | 0.679 | 0.094 | 1.34E-141 | 17 |
| NGFRAP1.3  | 1.79E-145 | 1.11914705  | 0.699 | 0.104 | 4.12E-141 | 17 |
| NID1.1     | 5.17E-145 | 0.786418937 | 0.352 | 0.027 | 1.19E-140 | 17 |
| PDLIM1.3   | 4.91E-144 | 1.295255154 | 0.72  | 0.112 | 1.13E-139 | 17 |
| APOLD1.1   | 3.13E-143 | 1.352756425 | 0.653 | 0.094 | 7.19E-139 | 17 |
| FHL2.1     | 3.88E-142 | 0.71060358  | 0.332 | 0.024 | 8.91E-138 | 17 |
| LAMC1.1    | 1.78E-141 | 0.779893216 | 0.404 | 0.036 | 4.08E-137 | 17 |
| RND3       | 7.36E-141 | 0.844474332 | 0.311 | 0.022 | 1.69E-136 | 17 |
| FSTL1.1    | 1.36E-140 | 0.817857849 | 0.456 | 0.046 | 3.13E-136 | 17 |
| RBFOX2     | 6.26E-140 | 0.696262042 | 0.295 | 0.02  | 1.44E-135 | 17 |
| MDK        | 2.12E-139 | 0.712886311 | 0.306 | 0.021 | 4.88E-135 | 17 |
| FKBP10.1   | 1.12E-138 | 0.616562736 | 0.342 | 0.027 | 2.58E-134 | 17 |

|             |           |             |       |       |           |    |
|-------------|-----------|-------------|-------|-------|-----------|----|
| ROCK2.1     | 3.18E-138 | 0.955246271 | 0.477 | 0.053 | 7.30E-134 | 17 |
| SPECC1.1    | 1.24E-137 | 1.046767647 | 0.446 | 0.048 | 2.85E-133 | 17 |
| SMIM3.1     | 4.08E-137 | 1.13385749  | 0.611 | 0.088 | 9.37E-133 | 17 |
| TLE1        | 4.77E-137 | 0.926740643 | 0.466 | 0.05  | 1.10E-132 | 17 |
| ST5         | 5.11E-137 | 0.58262497  | 0.259 | 0.015 | 1.18E-132 | 17 |
| CTTN.1      | 5.66E-135 | 0.694809928 | 0.389 | 0.035 | 1.30E-130 | 17 |
| LPP.1       | 9.45E-135 | 1.542947146 | 0.788 | 0.157 | 2.17E-130 | 17 |
| LPL.1       | 1.46E-133 | 0.962205653 | 0.352 | 0.03  | 3.35E-129 | 17 |
| EDNRB.1     | 2.47E-133 | 0.804278618 | 0.503 | 0.057 | 5.68E-129 | 17 |
| WBP5.3      | 4.35E-132 | 0.902004017 | 0.575 | 0.078 | 1.00E-127 | 17 |
| C16orf45    | 1.10E-131 | 0.542616793 | 0.264 | 0.016 | 2.52E-127 | 17 |
| HSPB2.1     | 7.40E-131 | 0.581777191 | 0.285 | 0.019 | 1.70E-126 | 17 |
| SOCS2       | 2.42E-130 | 0.736504573 | 0.337 | 0.027 | 5.56E-126 | 17 |
| ZNF503      | 4.22E-128 | 0.702061005 | 0.306 | 0.023 | 9.71E-124 | 17 |
| PRKCDBP.3   | 8.10E-128 | 1.037289872 | 0.56  | 0.077 | 1.86E-123 | 17 |
| PDLIM5.1    | 1.63E-127 | 1.290208783 | 0.544 | 0.077 | 3.75E-123 | 17 |
| PACSIN2     | 2.31E-127 | 1.12629601  | 0.549 | 0.077 | 5.30E-123 | 17 |
| CFL2.1      | 3.28E-124 | 0.919477576 | 0.435 | 0.048 | 7.54E-120 | 17 |
| NTN4.1      | 6.46E-124 | 0.707890415 | 0.332 | 0.027 | 1.48E-119 | 17 |
| NBL1        | 3.48E-123 | 0.777500611 | 0.383 | 0.037 | 7.99E-119 | 17 |
| NDUFA4L2.16 | 6.00E-123 | 1.84000297  | 0.979 | 0.279 | 1.38E-118 | 17 |
| FBLIM1      | 6.64E-122 | 0.996581688 | 0.451 | 0.052 | 1.52E-117 | 17 |
| CD151.4     | 3.68E-121 | 1.348564762 | 0.839 | 0.192 | 8.46E-117 | 17 |
| RASAL2.2    | 3.33E-120 | 0.917225722 | 0.446 | 0.053 | 7.65E-116 | 17 |
| SEPT11.1    | 1.10E-119 | 1.293726381 | 0.663 | 0.118 | 2.52E-115 | 17 |
| MAP1LC3A.1  | 1.31E-119 | 0.932308664 | 0.513 | 0.067 | 3.00E-115 | 17 |
| TSC22D1.4   | 3.05E-119 | 1.393715421 | 0.824 | 0.174 | 7.02E-115 | 17 |
| EMCN.1      | 4.51E-119 | 0.748577649 | 0.358 | 0.033 | 1.04E-114 | 17 |
| FBXO32      | 1.92E-118 | 1.234633548 | 0.513 | 0.069 | 4.41E-114 | 17 |
| SASH1.1     | 5.57E-118 | 0.742634156 | 0.352 | 0.033 | 1.28E-113 | 17 |
| PTMS.5      | 1.09E-116 | 1.497412029 | 0.886 | 0.233 | 2.52E-112 | 17 |
| GNAI1.1     | 2.64E-116 | 0.518613699 | 0.28  | 0.021 | 6.07E-112 | 17 |
| RBPMS.2     | 1.34E-115 | 0.734833556 | 0.477 | 0.06  | 3.08E-111 | 17 |
| CYSTM1.4    | 1.40E-115 | 0.956418089 | 0.715 | 0.133 | 3.21E-111 | 17 |
| TWSG1       | 3.46E-115 | 0.674282545 | 0.326 | 0.03  | 7.96E-111 | 17 |
| CHN1        | 2.58E-114 | 0.508577601 | 0.269 | 0.02  | 5.93E-110 | 17 |
| FN1.2       | 2.24E-112 | 1.308737812 | 0.658 | 0.116 | 5.14E-108 | 17 |
| TRIP6.1     | 1.21E-111 | 0.79944154  | 0.42  | 0.05  | 2.79E-107 | 17 |
| CAMK2N1.1   | 8.68E-111 | 0.521511251 | 0.259 | 0.019 | 2.00E-106 | 17 |
| PRSS23.2    | 1.08E-110 | 0.865525093 | 0.648 | 0.107 | 2.48E-106 | 17 |
| EFEMP2.1    | 3.11E-110 | 0.684075265 | 0.337 | 0.032 | 7.16E-106 | 17 |
| GAS6.1      | 4.16E-109 | 0.879505836 | 0.492 | 0.07  | 9.57E-105 | 17 |
| KLHDC8B     | 6.09E-109 | 0.64068261  | 0.28  | 0.023 | 1.40E-104 | 17 |
| CHST7       | 4.23E-108 | 0.573157914 | 0.29  | 0.024 | 9.72E-104 | 17 |
| GNG12.1     | 4.84E-108 | 0.586824627 | 0.29  | 0.025 | 1.11E-103 | 17 |
| NUDT4       | 6.05E-108 | 1.3075467   | 0.637 | 0.12  | 1.39E-103 | 17 |
| JADE1       | 1.44E-107 | 1.064462318 | 0.523 | 0.079 | 3.30E-103 | 17 |
| AK1         | 4.46E-107 | 0.704910549 | 0.383 | 0.042 | 1.02E-102 | 17 |
| B3GNT2      | 5.74E-107 | 0.97292268  | 0.549 | 0.085 | 1.32E-102 | 17 |
| MEF2C.3     | 1.92E-106 | 1.245963463 | 0.715 | 0.143 | 4.41E-102 | 17 |
| MAGED2.1    | 4.47E-106 | 1.276115959 | 0.694 | 0.144 | 1.03E-101 | 17 |
| UBA2        | 7.82E-106 | 1.238023565 | 0.71  | 0.149 | 1.80E-101 | 17 |
| H1FO.1      | 1.43E-105 | 0.809576943 | 0.43  | 0.056 | 3.28E-101 | 17 |
| PKIG.3      | 4.23E-105 | 0.721048272 | 0.446 | 0.058 | 9.73E-101 | 17 |
| ILK         | 6.81E-105 | 1.257543303 | 0.705 | 0.153 | 1.57E-100 | 17 |
| RAPGEF5.1   | 8.67E-105 | 0.52573693  | 0.321 | 0.03  | 1.99E-100 | 17 |
| TIMP1.15    | 2.60E-104 | 2.121081719 | 0.927 | 0.306 | 5.97E-100 | 17 |
| GSTM3.1     | 3.15E-104 | 0.684821791 | 0.378 | 0.043 | 7.23E-100 | 17 |



|            |           |             |       |       |          |    |
|------------|-----------|-------------|-------|-------|----------|----|
| TRIB2      | 6.16E-104 | 0.781786129 | 0.368 | 0.04  | 1.42E-99 | 17 |
| TCF4.2     | 2.42E-101 | 1.034538451 | 0.611 | 0.112 | 5.56E-97 | 17 |
| LGALS1.8   | 1.46E-100 | 1.92650989  | 1     | 0.566 | 3.35E-96 | 17 |
| SERPINH1.1 | 4.39E-100 | 1.109220113 | 0.487 | 0.074 | 1.01E-95 | 17 |
| SLCO3A1    | 1.82E-99  | 0.848451726 | 0.373 | 0.044 | 4.18E-95 | 17 |
| IFITM3.15  | 3.14E-99  | 1.732398418 | 0.979 | 0.37  | 7.22E-95 | 17 |
| FARP1.1    | 5.74E-99  | 0.687689892 | 0.373 | 0.045 | 1.32E-94 | 17 |
| OAZ2.2     | 9.35E-99  | 1.200726281 | 0.741 | 0.175 | 2.15E-94 | 17 |
| C4orf32    | 1.17E-98  | 0.671322778 | 0.326 | 0.034 | 2.70E-94 | 17 |
| ARHGAP10   | 3.73E-97  | 0.793750594 | 0.342 | 0.038 | 8.58E-93 | 17 |
| GOLIM4.2   | 1.92E-96  | 0.950313147 | 0.534 | 0.092 | 4.41E-92 | 17 |
| C1orf54.3  | 2.22E-96  | 0.965928934 | 0.503 | 0.081 | 5.10E-92 | 17 |
| TJP1.1     | 6.24E-96  | 0.555365618 | 0.326 | 0.034 | 1.44E-91 | 17 |
| ARHGAP29.1 | 2.98E-93  | 0.592261942 | 0.456 | 0.064 | 6.84E-89 | 17 |
| COL6A3     | 7.97E-93  | 0.689935182 | 0.306 | 0.031 | 1.83E-88 | 17 |
| PPFIBP1.2  | 8.75E-93  | 0.552342324 | 0.389 | 0.049 | 2.01E-88 | 17 |
| A2M.3      | 1.52E-92  | 1.150510313 | 0.767 | 0.188 | 3.50E-88 | 17 |
| CYB5R3.4   | 7.80E-92  | 0.991042859 | 0.746 | 0.179 | 1.79E-87 | 17 |
| HSPB1.15   | 2.82E-91  | 1.839160513 | 0.979 | 0.427 | 6.49E-87 | 17 |
| UBE2E2.2   | 3.61E-91  | 0.772351291 | 0.435 | 0.066 | 8.30E-87 | 17 |
| ZFH3.3     | 4.88E-91  | 0.958301205 | 0.487 | 0.081 | 1.12E-86 | 17 |
| SPTBN1.1   | 5.09E-91  | 0.735901689 | 0.56  | 0.097 | 1.17E-86 | 17 |
| SGCB.1     | 4.62E-90  | 0.603359303 | 0.337 | 0.039 | 1.06E-85 | 17 |
| CD59.6     | 2.34E-89  | 0.841798665 | 0.845 | 0.224 | 5.37E-85 | 17 |
| SPRY2      | 1.12E-88  | 0.618317137 | 0.311 | 0.034 | 2.58E-84 | 17 |
| RGS16      | 1.67E-88  | 0.936667404 | 0.311 | 0.034 | 3.84E-84 | 17 |
| EPHX1.1    | 2.71E-88  | 0.630621483 | 0.326 | 0.038 | 6.24E-84 | 17 |
| TSPAN3.1   | 3.16E-88  | 0.811581251 | 0.534 | 0.097 | 7.26E-84 | 17 |
| PTEN.3     | 1.05E-87  | 1.050728175 | 0.648 | 0.144 | 2.41E-83 | 17 |
| FAM127A    | 1.49E-87  | 0.833892297 | 0.477 | 0.08  | 3.42E-83 | 17 |
| AXL.2      | 3.76E-87  | 1.066106158 | 0.466 | 0.078 | 8.63E-83 | 17 |
| SORBS2.1   | 1.23E-86  | 0.65945143  | 0.347 | 0.043 | 2.83E-82 | 17 |
| LMNA.2     | 3.89E-86  | 1.02760976  | 0.72  | 0.167 | 8.93E-82 | 17 |
| APP.5      | 2.66E-85  | 0.814342743 | 0.72  | 0.171 | 6.11E-81 | 17 |
| ENG.2      | 2.27E-84  | 0.788627007 | 0.544 | 0.101 | 5.22E-80 | 17 |
| GPX3.5     | 1.02E-83  | 1.145334645 | 0.668 | 0.158 | 2.35E-79 | 17 |
| IFI27.3    | 2.25E-83  | 0.919709222 | 0.674 | 0.147 | 5.17E-79 | 17 |
| PPARG      | 2.56E-83  | 0.589591424 | 0.254 | 0.025 | 5.87E-79 | 17 |
| ARMCX2     | 2.94E-83  | 0.593993447 | 0.264 | 0.027 | 6.75E-79 | 17 |
| DST.2      | 3.56E-83  | 0.911402384 | 0.451 | 0.077 | 8.18E-79 | 17 |
| GRK5       | 1.63E-82  | 0.574875551 | 0.321 | 0.038 | 3.76E-78 | 17 |
| ZBTB16.4   | 4.43E-82  | 1.249428403 | 0.767 | 0.213 | 1.02E-77 | 17 |
| FAM46A.1   | 4.50E-82  | 0.989268199 | 0.472 | 0.081 | 1.03E-77 | 17 |
| MYO1C.1    | 6.82E-81  | 0.630675347 | 0.378 | 0.054 | 1.57E-76 | 17 |
| FLNA.3     | 8.02E-80  | 1.08825788  | 0.699 | 0.177 | 1.84E-75 | 17 |
| SERPINI1.1 | 1.52E-79  | 0.681931806 | 0.29  | 0.032 | 3.50E-75 | 17 |
| ITGB1.10   | 1.10E-78  | 1.556946421 | 0.948 | 0.457 | 2.53E-74 | 17 |
| ARHGAP17   | 8.72E-78  | 0.601491135 | 0.306 | 0.037 | 2.00E-73 | 17 |
| SELM.4     | 2.51E-77  | 1.163623173 | 0.689 | 0.177 | 5.77E-73 | 17 |
| MYL6.8     | 1.87E-75  | 1.349001624 | 0.99  | 0.794 | 4.30E-71 | 17 |
| TCF7L2.1   | 5.01E-75  | 0.565608579 | 0.29  | 0.035 | 1.15E-70 | 17 |
| MARCKSL1.1 | 1.66E-74  | 0.793031371 | 0.461 | 0.082 | 3.81E-70 | 17 |
| ARHGEF7.1  | 3.90E-74  | 0.667151303 | 0.409 | 0.066 | 8.97E-70 | 17 |
| WBP4       | 4.59E-73  | 0.912466289 | 0.487 | 0.096 | 1.05E-68 | 17 |
| CDKN1A.2   | 5.05E-73  | 0.817884667 | 0.539 | 0.114 | 1.16E-68 | 17 |
| HIP1       | 1.61E-72  | 0.662499657 | 0.425 | 0.071 | 3.69E-68 | 17 |
| TUBB6      | 2.20E-72  | 0.543015977 | 0.269 | 0.031 | 5.06E-68 | 17 |
| LEPROT.3   | 6.30E-72  | 0.92709923  | 0.699 | 0.191 | 1.45E-67 | 17 |

|            |          |              |       |       |          |    |
|------------|----------|--------------|-------|-------|----------|----|
| CALU.1     | 1.74E-71 | 0.724721787  | 0.492 | 0.097 | 4.00E-67 | 17 |
| MGST3.13   | 2.48E-71 | 1.162589979  | 0.85  | 0.299 | 5.69E-67 | 17 |
| PTPN9      | 2.71E-71 | 0.601502203  | 0.342 | 0.049 | 6.24E-67 | 17 |
| ARHGAP1    | 1.09E-70 | 0.604074232  | 0.358 | 0.054 | 2.51E-66 | 17 |
| SORT1.1    | 6.26E-70 | 0.635773155  | 0.337 | 0.05  | 1.44E-65 | 17 |
| SOX4.1     | 1.80E-69 | 0.651705082  | 0.492 | 0.097 | 4.13E-65 | 17 |
| EPB41L2.3  | 4.52E-69 | 0.778119353  | 0.466 | 0.091 | 1.04E-64 | 17 |
| FSTL3.1    | 7.32E-69 | 0.562682305  | 0.269 | 0.032 | 1.68E-64 | 17 |
| H2AFJ.2    | 7.96E-69 | 0.941408139  | 0.715 | 0.203 | 1.83E-64 | 17 |
| CSNK1E     | 8.22E-69 | 0.593887717  | 0.378 | 0.061 | 1.89E-64 | 17 |
| CST3.16    | 8.97E-69 | 0.960351922  | 0.984 | 0.377 | 2.06E-64 | 17 |
| TRAK1      | 1.14E-68 | 0.582457417  | 0.275 | 0.034 | 2.62E-64 | 17 |
| TOB1.2     | 2.15E-68 | 0.926110951  | 0.679 | 0.174 | 4.93E-64 | 17 |
| KLF9.1     | 2.17E-68 | 0.850884675  | 0.622 | 0.155 | 4.99E-64 | 17 |
| ASAP1.1    | 1.22E-67 | 0.791056052  | 0.472 | 0.095 | 2.80E-63 | 17 |
| PHACTR2.2  | 1.45E-67 | 0.772906075  | 0.503 | 0.103 | 3.33E-63 | 17 |
| CTBP2      | 1.92E-67 | 0.641410447  | 0.389 | 0.067 | 4.41E-63 | 17 |
| TCEAL4.4   | 2.04E-67 | 0.840364965  | 0.606 | 0.153 | 4.68E-63 | 17 |
| HES1.3     | 4.82E-67 | 0.766020946  | 0.44  | 0.08  | 1.11E-62 | 17 |
| TACC1.3    | 7.99E-67 | 0.977708405  | 0.741 | 0.222 | 1.84E-62 | 17 |
| CPQ        | 1.16E-66 | 0.747420237  | 0.461 | 0.092 | 2.67E-62 | 17 |
| MTHFD2.2   | 2.37E-66 | 1.035971531  | 0.513 | 0.116 | 5.45E-62 | 17 |
| INAFM1     | 8.02E-66 | 0.553597696  | 0.264 | 0.033 | 1.84E-61 | 17 |
| IFIT3      | 1.20E-65 | 0.717115447  | 0.321 | 0.047 | 2.76E-61 | 17 |
| UTRN.4     | 1.62E-65 | 1.218259269  | 0.715 | 0.224 | 3.71E-61 | 17 |
| NFIA.2     | 1.88E-65 | 0.69539366   | 0.425 | 0.079 | 4.31E-61 | 17 |
| PELO       | 3.47E-65 | 0.517058517  | 0.321 | 0.047 | 7.97E-61 | 17 |
| MTUS1.1    | 1.88E-64 | 0.505734402  | 0.352 | 0.056 | 4.33E-60 | 17 |
| RPS29.12   | 3.34E-64 | -1.679956859 | 0.974 | 0.92  | 7.68E-60 | 17 |
| ADAP2.2    | 4.05E-64 | 0.777153326  | 0.42  | 0.08  | 9.30E-60 | 17 |
| SEPT7.9    | 5.59E-64 | 1.387093331  | 0.933 | 0.507 | 1.29E-59 | 17 |
| MAGEF1     | 2.00E-63 | 0.52007443   | 0.316 | 0.047 | 4.59E-59 | 17 |
| CD63.14    | 8.64E-63 | 1.144351175  | 0.974 | 0.513 | 1.99E-58 | 17 |
| KIAA0040   | 2.81E-62 | 0.578638976  | 0.337 | 0.053 | 6.45E-58 | 17 |
| C5orf24.1  | 3.76E-62 | 0.758885828  | 0.503 | 0.113 | 8.64E-58 | 17 |
| PRKAR1A.4  | 4.04E-62 | 0.908285491  | 0.777 | 0.254 | 9.29E-58 | 17 |
| EGR1.3     | 1.16E-61 | 1.036390312  | 0.56  | 0.136 | 2.66E-57 | 17 |
| AAMDC.1    | 2.05E-61 | 0.553503376  | 0.435 | 0.086 | 4.71E-57 | 17 |
| GRAMD3.1   | 6.24E-61 | 0.562231035  | 0.321 | 0.05  | 1.43E-56 | 17 |
| TFPI.2     | 1.12E-60 | 0.620268276  | 0.383 | 0.068 | 2.57E-56 | 17 |
| RHOB.14    | 1.62E-60 | 1.005070536  | 0.907 | 0.341 | 3.73E-56 | 17 |
| RSU1.1     | 4.80E-60 | 0.760164231  | 0.554 | 0.137 | 1.10E-55 | 17 |
| LAPTM4A.12 | 6.86E-60 | 0.971943555  | 0.87  | 0.345 | 1.58E-55 | 17 |
| CRIM1.1    | 1.52E-59 | 0.77974042   | 0.404 | 0.076 | 3.50E-55 | 17 |
| FHL3.1     | 4.33E-59 | 0.535139794  | 0.347 | 0.06  | 9.95E-55 | 17 |
| TNS3       | 5.59E-59 | 0.590230556  | 0.269 | 0.038 | 1.29E-54 | 17 |
| EID1.6     | 5.45E-58 | 1.006070684  | 0.902 | 0.421 | 1.25E-53 | 17 |
| SPATS2L.1  | 5.69E-57 | 0.590195415  | 0.508 | 0.119 | 1.31E-52 | 17 |
| ITGAV.2    | 7.94E-57 | 0.617061045  | 0.389 | 0.077 | 1.82E-52 | 17 |
| SCPEP1.3   | 1.03E-56 | 0.740004301  | 0.528 | 0.131 | 2.37E-52 | 17 |
| STOM.1     | 3.77E-55 | 0.847459686  | 0.642 | 0.196 | 8.67E-51 | 17 |
| DYNLT3     | 6.05E-55 | 0.680219618  | 0.513 | 0.126 | 1.39E-50 | 17 |
| CBX6       | 8.16E-55 | 0.551685143  | 0.404 | 0.081 | 1.87E-50 | 17 |
| OSBPL1A.1  | 4.12E-54 | 0.544175095  | 0.368 | 0.071 | 9.48E-50 | 17 |
| NENF.2     | 4.34E-54 | 0.708289256  | 0.642 | 0.191 | 9.98E-50 | 17 |
| RPL28.11   | 4.91E-54 | -1.123056835 | 0.99  | 0.932 | 1.13E-49 | 17 |
| HTRA1.3    | 5.00E-54 | 0.582702584  | 0.461 | 0.105 | 1.15E-49 | 17 |
| ACTN4.3    | 1.16E-53 | 1.048387731  | 0.689 | 0.228 | 2.67E-49 | 17 |

|               |          |              |       |       |          |    |
|---------------|----------|--------------|-------|-------|----------|----|
| SH3BGRL.10    | 1.34E-53 | 0.999075444  | 0.87  | 0.383 | 3.07E-49 | 17 |
| MIR4435-2HG.3 | 1.52E-53 | 0.740016407  | 0.56  | 0.146 | 3.49E-49 | 17 |
| SSPN.2        | 2.24E-53 | 0.594054757  | 0.275 | 0.043 | 5.15E-49 | 17 |
| BCL6          | 4.00E-53 | 0.578529074  | 0.306 | 0.052 | 9.19E-49 | 17 |
| RCN2.2        | 8.11E-53 | 0.713719254  | 0.56  | 0.149 | 1.86E-48 | 17 |
| IFI6.1        | 1.15E-52 | 0.96573578   | 0.658 | 0.2   | 2.64E-48 | 17 |
| CEBPD.12      | 1.17E-52 | 1.047861073  | 0.788 | 0.272 | 2.68E-48 | 17 |
| ZMAT3         | 1.52E-52 | 0.661254867  | 0.358 | 0.068 | 3.50E-48 | 17 |
| PPP1R12A.8    | 6.45E-52 | 0.970114354  | 0.756 | 0.272 | 1.48E-47 | 17 |
| CYBRD1.1      | 9.58E-52 | 0.518190736  | 0.259 | 0.04  | 2.20E-47 | 17 |
| FABP5.3       | 2.38E-51 | 0.896764232  | 0.648 | 0.201 | 5.46E-47 | 17 |
| HCFC1R1.3     | 3.31E-51 | 0.577382891  | 0.492 | 0.122 | 7.61E-47 | 17 |
| CD9.5         | 1.12E-50 | 0.934165105  | 0.679 | 0.217 | 2.58E-46 | 17 |
| ARMCX3.2      | 4.42E-50 | 0.800195194  | 0.528 | 0.146 | 1.02E-45 | 17 |
| ZBTB20.3      | 6.80E-50 | 0.67021986   | 0.549 | 0.148 | 1.56E-45 | 17 |
| ZHX1          | 1.15E-49 | 0.529026994  | 0.301 | 0.053 | 2.64E-45 | 17 |
| SEPW1.13      | 1.32E-49 | 0.80911492   | 0.829 | 0.353 | 3.03E-45 | 17 |
| ADI1.1        | 4.10E-49 | 0.604798009  | 0.554 | 0.156 | 9.43E-45 | 17 |
| DYNC1I2.6     | 5.60E-49 | 0.815383731  | 0.679 | 0.238 | 1.29E-44 | 17 |
| HIGD1A        | 1.80E-48 | 0.609912683  | 0.446 | 0.108 | 4.13E-44 | 17 |
| SLC39A6.1     | 2.03E-48 | 0.587928919  | 0.337 | 0.067 | 4.67E-44 | 17 |
| RPS27.10      | 3.20E-48 | -1.041115202 | 1     | 0.975 | 7.36E-44 | 17 |
| TAX1BP3.2     | 3.20E-48 | 0.608326268  | 0.508 | 0.138 | 7.36E-44 | 17 |
| ADD3.3        | 1.62E-47 | 0.804536862  | 0.56  | 0.162 | 3.72E-43 | 17 |
| CDC5L         | 3.25E-47 | 0.736197485  | 0.497 | 0.134 | 7.46E-43 | 17 |
| RPS15A.8      | 4.49E-47 | -0.966607871 | 1     | 0.933 | 1.03E-42 | 17 |
| SBDS.6        | 6.52E-47 | 0.756642492  | 0.736 | 0.265 | 1.50E-42 | 17 |
| TIMP2.4       | 2.21E-46 | 0.650583838  | 0.358 | 0.077 | 5.07E-42 | 17 |
| AIG1.1        | 3.11E-46 | 0.511168457  | 0.383 | 0.087 | 7.15E-42 | 17 |
| ANXA6.13      | 7.21E-46 | 0.886389668  | 0.705 | 0.243 | 1.66E-41 | 17 |
| DYNLL1.9      | 7.27E-46 | 0.861429329  | 0.876 | 0.403 | 1.67E-41 | 17 |
| BCAP29.1      | 1.12E-45 | 0.605134265  | 0.477 | 0.125 | 2.57E-41 | 17 |
| RPS28.8       | 1.35E-45 | -0.860798041 | 0.995 | 0.946 | 3.10E-41 | 17 |
| PEBP1.13      | 1.40E-45 | 0.713914758  | 0.87  | 0.383 | 3.22E-41 | 17 |
| MT2A.16       | 2.08E-45 | 0.705662443  | 0.969 | 0.655 | 4.77E-41 | 17 |
| RPS2.8        | 2.50E-45 | -0.945201269 | 0.99  | 0.944 | 5.74E-41 | 17 |
| RPL39.8       | 3.28E-45 | -0.971890143 | 0.995 | 0.944 | 7.54E-41 | 17 |
| CALM2.6       | 4.56E-45 | 0.974452524  | 0.984 | 0.626 | 1.05E-40 | 17 |
| BSG.8         | 5.13E-45 | 0.752602429  | 0.788 | 0.322 | 1.18E-40 | 17 |
| RPLP2.8       | 5.15E-45 | -0.887666585 | 1     | 0.943 | 1.18E-40 | 17 |
| F2R.2         | 6.92E-45 | 0.592950951  | 0.492 | 0.125 | 1.59E-40 | 17 |
| RAC1.10       | 8.36E-45 | 0.787929799  | 0.933 | 0.441 | 1.92E-40 | 17 |
| CXCR4.12      | 9.33E-45 | -2.771115273 | 0.57  | 0.778 | 2.14E-40 | 17 |
| EI24.2        | 1.43E-44 | 0.526411079  | 0.425 | 0.104 | 3.28E-40 | 17 |
| OLFML3.1      | 2.47E-44 | 0.554471812  | 0.259 | 0.044 | 5.68E-40 | 17 |
| RAB2A.6       | 4.40E-44 | 0.672609517  | 0.72  | 0.263 | 1.01E-39 | 17 |
| RRAGA.1       | 4.70E-44 | 0.567205748  | 0.482 | 0.132 | 1.08E-39 | 17 |
| RPL41.12      | 1.57E-43 | -0.781815854 | 1     | 0.976 | 3.60E-39 | 17 |
| RABGAP1.1     | 1.90E-43 | 0.550024313  | 0.316 | 0.064 | 4.36E-39 | 17 |
| HSD17B12.2    | 7.32E-43 | 0.641246567  | 0.42  | 0.108 | 1.68E-38 | 17 |
| CRTC3         | 8.29E-43 | 0.576451733  | 0.332 | 0.07  | 1.91E-38 | 17 |
| SMARCB1       | 3.89E-42 | 0.625414571  | 0.456 | 0.125 | 8.93E-38 | 17 |
| MAP4.3        | 6.94E-42 | 0.571191807  | 0.565 | 0.173 | 1.59E-37 | 17 |
| ARHGEF12.1    | 8.06E-42 | 0.505692362  | 0.342 | 0.074 | 1.85E-37 | 17 |
| ADD1.1        | 2.00E-41 | 0.543364844  | 0.497 | 0.14  | 4.60E-37 | 17 |
| ARFGAP3.1     | 2.01E-41 | 0.599532411  | 0.43  | 0.113 | 4.63E-37 | 17 |
| EEA1.1        | 6.94E-41 | 0.589653719  | 0.383 | 0.095 | 1.60E-36 | 17 |
| ABI2.1        | 1.62E-40 | 0.586505674  | 0.368 | 0.088 | 3.73E-36 | 17 |

|            |          |              |       |       |          |    |
|------------|----------|--------------|-------|-------|----------|----|
| RNASEH2C.1 | 2.08E-40 | 0.66444758   | 0.549 | 0.174 | 4.78E-36 | 17 |
| CBR1       | 2.45E-40 | 0.533540625  | 0.378 | 0.093 | 5.64E-36 | 17 |
| TLN1.6     | 2.77E-40 | 0.760502548  | 0.689 | 0.259 | 6.36E-36 | 17 |
| MT-CYB.13  | 3.31E-40 | 0.811878827  | 0.979 | 0.802 | 7.61E-36 | 17 |
| NUCKS1.6   | 8.47E-40 | 0.885492497  | 0.824 | 0.392 | 1.95E-35 | 17 |
| PTPRC.15   | 1.80E-39 | -2.486537834 | 0.207 | 0.622 | 4.15E-35 | 17 |
| DCTN2      | 3.02E-39 | 0.570066665  | 0.518 | 0.16  | 6.94E-35 | 17 |
| ZNF428.1   | 3.61E-39 | 0.529670618  | 0.544 | 0.17  | 8.30E-35 | 17 |
| RPS12.5    | 4.35E-39 | -0.874579011 | 0.99  | 0.938 | 1.00E-34 | 17 |
| AP2M1.4    | 6.48E-39 | 0.666593613  | 0.767 | 0.317 | 1.49E-34 | 17 |
| SKP1.4     | 1.36E-38 | 0.788994488  | 0.938 | 0.598 | 3.14E-34 | 17 |
| CHD9.2     | 1.80E-38 | 0.695906838  | 0.58  | 0.198 | 4.13E-34 | 17 |
| FNIP2.3    | 1.84E-38 | 0.56734666   | 0.321 | 0.073 | 4.24E-34 | 17 |
| ACTR10     | 5.00E-38 | 0.506927885  | 0.466 | 0.134 | 1.15E-33 | 17 |
| AHCYL1.1   | 5.58E-38 | 0.55309454   | 0.342 | 0.083 | 1.28E-33 | 17 |
| SYPL1.2    | 7.11E-38 | 0.64181949   | 0.549 | 0.184 | 1.63E-33 | 17 |
| DDAH2.2    | 7.95E-38 | 0.649980787  | 0.43  | 0.123 | 1.83E-33 | 17 |
| VIMP.3     | 1.22E-37 | 0.658081107  | 0.622 | 0.223 | 2.80E-33 | 17 |
| FDX1       | 2.29E-37 | 0.650160426  | 0.503 | 0.156 | 5.26E-33 | 17 |
| KCNMB1.2   | 3.24E-37 | 0.587258459  | 0.28  | 0.059 | 7.46E-33 | 17 |
| GBP2.8     | 9.37E-37 | 0.924148202  | 0.663 | 0.257 | 2.15E-32 | 17 |
| RTN4.13    | 1.16E-36 | 0.714198923  | 0.788 | 0.344 | 2.67E-32 | 17 |
| RPL10.10   | 1.96E-36 | -0.735488429 | 1     | 0.974 | 4.50E-32 | 17 |
| CHCHD10.10 | 2.31E-35 | 0.629559799  | 0.632 | 0.241 | 5.31E-31 | 17 |
| RPS25.11   | 2.47E-35 | -0.881519591 | 0.995 | 0.917 | 5.67E-31 | 17 |
| TMEM14C.5  | 2.93E-35 | 0.556948996  | 0.611 | 0.221 | 6.72E-31 | 17 |
| RPS3.11    | 3.85E-35 | -0.83105147  | 0.984 | 0.918 | 8.84E-31 | 17 |
| ATP5B.4    | 5.81E-35 | 0.680836875  | 0.788 | 0.363 | 1.34E-30 | 17 |
| RPL26.7    | 9.10E-35 | -0.776724656 | 0.99  | 0.935 | 2.09E-30 | 17 |
| SYNE2.16   | 1.60E-34 | 0.654824962  | 0.798 | 0.326 | 3.67E-30 | 17 |
| OSBPL9.1   | 2.17E-34 | 0.557729472  | 0.326 | 0.081 | 5.00E-30 | 17 |
| BST2.10    | 2.32E-34 | 0.719723932  | 0.788 | 0.355 | 5.34E-30 | 17 |
| ACADVL     | 2.91E-34 | 0.661278034  | 0.58  | 0.211 | 6.69E-30 | 17 |
| KTN1.10    | 4.80E-34 | 0.618071146  | 0.829 | 0.377 | 1.10E-29 | 17 |
| RHOC.11    | 5.50E-34 | 0.573594887  | 0.736 | 0.317 | 1.26E-29 | 17 |
| VASP.2     | 7.14E-34 | 0.593986364  | 0.606 | 0.221 | 1.64E-29 | 17 |
| PTPN12.1   | 7.40E-34 | 0.536889318  | 0.383 | 0.107 | 1.70E-29 | 17 |
| ZFP36L2.14 | 1.58E-33 | -2.559215908 | 0.487 | 0.701 | 3.63E-29 | 17 |
| TMSB10.11  | 2.78E-33 | -1.004343634 | 0.995 | 0.96  | 6.39E-29 | 17 |
| NDUFS2.1   | 5.88E-33 | 0.553365622  | 0.534 | 0.186 | 1.35E-28 | 17 |
| TMEM59.5   | 6.12E-33 | 0.658599986  | 0.87  | 0.471 | 1.41E-28 | 17 |
| SLC25A3.5  | 8.74E-33 | 0.677995119  | 0.834 | 0.405 | 2.01E-28 | 17 |
| RGS1.17    | 9.71E-33 | -3.005255704 | 0.513 | 0.699 | 2.23E-28 | 17 |
| ITFG1.1    | 1.06E-32 | 0.549464691  | 0.389 | 0.111 | 2.44E-28 | 17 |
| ARF4.1     | 2.23E-32 | 0.506039264  | 0.544 | 0.194 | 5.11E-28 | 17 |
| POLR2F     | 2.93E-32 | 0.544178136  | 0.575 | 0.206 | 6.74E-28 | 17 |
| CLTA.10    | 3.50E-32 | 0.550634262  | 0.684 | 0.285 | 8.05E-28 | 17 |
| ZFAND5.10  | 3.84E-32 | 0.574320181  | 0.72  | 0.302 | 8.83E-28 | 17 |
| RPL1.4     | 4.79E-32 | -0.686362969 | 1     | 0.966 | 1.10E-27 | 17 |
| MTRNR2L8.3 | 6.11E-32 | 0.596737658  | 0.591 | 0.22  | 1.41E-27 | 17 |
| TBC1D1.1   | 1.00E-31 | 0.555934367  | 0.389 | 0.113 | 2.30E-27 | 17 |
| SEPT2.6    | 1.74E-31 | 0.746285245  | 0.622 | 0.257 | 3.99E-27 | 17 |
| RPS14.9    | 9.16E-31 | -0.699609501 | 1     | 0.946 | 2.10E-26 | 17 |
| CORO1A.13  | 1.02E-30 | -2.067335855 | 0.202 | 0.57  | 2.35E-26 | 17 |
| ROCK1.10   | 1.70E-30 | 0.64980974   | 0.736 | 0.325 | 3.91E-26 | 17 |
| VMP1.11    | 1.74E-30 | 0.663291266  | 0.72  | 0.314 | 4.00E-26 | 17 |
| RPS21.10   | 1.76E-30 | -0.991914539 | 0.938 | 0.861 | 4.04E-26 | 17 |
| RPL23A.11  | 1.99E-30 | -0.745237455 | 0.99  | 0.929 | 4.57E-26 | 17 |

|              |          |              |       |       |          |    |
|--------------|----------|--------------|-------|-------|----------|----|
| COX17.9      | 7.61E-30 | 0.598075119  | 0.71  | 0.313 | 1.75E-25 | 17 |
| MRFAP1.7     | 1.53E-29 | 0.51191522   | 0.699 | 0.304 | 3.52E-25 | 17 |
| NSRP1.1      | 1.67E-29 | 0.504519903  | 0.497 | 0.174 | 3.85E-25 | 17 |
| ATP6AP2.9    | 1.69E-29 | 0.568789351  | 0.694 | 0.301 | 3.88E-25 | 17 |
| TIPARP.2     | 1.90E-29 | 0.569182445  | 0.409 | 0.128 | 4.38E-25 | 17 |
| HSP90AA1.10  | 1.99E-29 | 0.605536438  | 0.984 | 0.649 | 4.57E-25 | 17 |
| RBMS1.3      | 2.15E-29 | 0.519344566  | 0.554 | 0.201 | 4.93E-25 | 17 |
| TMEM165.5    | 4.76E-29 | 0.560436833  | 0.585 | 0.234 | 1.09E-24 | 17 |
| SUMO2.5      | 5.32E-29 | 0.602810308  | 0.959 | 0.602 | 1.22E-24 | 17 |
| CCND1.2      | 6.13E-29 | 0.514698784  | 0.326 | 0.089 | 1.41E-24 | 17 |
| HCST.13      | 1.35E-28 | -2.079659264 | 0.197 | 0.549 | 3.11E-24 | 17 |
| RPL27A.7     | 1.97E-28 | -0.658270132 | 1     | 0.929 | 4.53E-24 | 17 |
| RPS24.10     | 2.78E-28 | -0.726504996 | 0.995 | 0.912 | 6.40E-24 | 17 |
| ISG15.3      | 2.95E-28 | 1.098240222  | 0.544 | 0.206 | 6.77E-24 | 17 |
| RPS6.7       | 9.23E-28 | -0.705671093 | 0.99  | 0.943 | 2.12E-23 | 17 |
| EIF4A1.5     | 1.42E-27 | 0.555408975  | 0.725 | 0.35  | 3.26E-23 | 17 |
| TMEM30A.1    | 1.91E-27 | 0.508893689  | 0.42  | 0.141 | 4.40E-23 | 17 |
| HSP90B1.5    | 2.01E-27 | 0.529544757  | 0.798 | 0.4   | 4.61E-23 | 17 |
| RPL37.9      | 2.23E-27 | -0.747431674 | 1     | 0.907 | 5.12E-23 | 17 |
| SRGN.13      | 2.87E-27 | -1.574968678 | 0.819 | 0.791 | 6.59E-23 | 17 |
| ERH.4        | 3.20E-27 | 0.535002521  | 0.741 | 0.355 | 7.36E-23 | 17 |
| DENND3.3     | 5.24E-27 | 0.523662146  | 0.321 | 0.093 | 1.21E-22 | 17 |
| RPS18.10     | 7.27E-27 | -0.675975383 | 1     | 0.958 | 1.67E-22 | 17 |
| PAK1.3       | 7.66E-27 | 0.555921323  | 0.326 | 0.097 | 1.76E-22 | 17 |
| RPL11.6      | 9.35E-27 | -0.643040791 | 1     | 0.937 | 2.15E-22 | 17 |
| RPL30.6      | 1.06E-26 | -0.70769779  | 0.984 | 0.896 | 2.45E-22 | 17 |
| S100A6.9     | 2.14E-26 | -1.595107325 | 0.58  | 0.769 | 4.91E-22 | 17 |
| LAPTM5.13    | 2.89E-26 | -1.927984409 | 0.28  | 0.571 | 6.64E-22 | 17 |
| RPL13.8      | 2.00E-25 | -0.594604532 | 1     | 0.964 | 4.59E-21 | 17 |
| MT-ATP6.11   | 2.13E-25 | 0.590799811  | 0.984 | 0.857 | 4.90E-21 | 17 |
| VIM.14       | 2.95E-25 | 0.567181836  | 0.99  | 0.768 | 6.78E-21 | 17 |
| MYH9.11      | 3.90E-25 | 0.60863595   | 0.663 | 0.306 | 8.96E-21 | 17 |
| RPL36.13     | 4.54E-25 | -0.812614308 | 0.995 | 0.911 | 1.04E-20 | 17 |
| RPS19.9      | 6.26E-25 | -0.682420047 | 1     | 0.951 | 1.44E-20 | 17 |
| RPL34.10     | 1.06E-24 | -0.644158759 | 0.995 | 0.952 | 2.43E-20 | 17 |
| FKBP5.11     | 1.76E-24 | 0.589613152  | 0.803 | 0.39  | 4.04E-20 | 17 |
| RPL18A.8     | 2.07E-24 | -0.669837057 | 0.995 | 0.929 | 4.75E-20 | 17 |
| GADD45B.3    | 2.25E-24 | 0.63715014   | 0.554 | 0.229 | 5.18E-20 | 17 |
| LUC7L3.10    | 3.03E-24 | 0.516735751  | 0.668 | 0.306 | 6.96E-20 | 17 |
| CD2.16       | 6.38E-24 | -2.322809399 | 0.124 | 0.462 | 1.47E-19 | 17 |
| CD164.5      | 2.12E-23 | 0.56043916   | 0.689 | 0.326 | 4.88E-19 | 17 |
| CD37.12      | 2.83E-23 | -1.686054735 | 0.145 | 0.467 | 6.51E-19 | 17 |
| IL32.14      | 3.33E-23 | -2.448174415 | 0.332 | 0.581 | 7.65E-19 | 17 |
| RPL19.8      | 5.72E-23 | -0.586737484 | 0.995 | 0.924 | 1.32E-18 | 17 |
| UBA52.5      | 7.19E-23 | -0.726071773 | 0.943 | 0.866 | 1.65E-18 | 17 |
| LINC00152.10 | 9.07E-23 | 0.543314961  | 0.663 | 0.312 | 2.08E-18 | 17 |
| ELOVL5.1     | 1.25E-22 | 0.520008416  | 0.466 | 0.182 | 2.87E-18 | 17 |
| RPL38.9      | 1.35E-22 | -0.811471045 | 0.948 | 0.866 | 3.09E-18 | 17 |
| RPS20.8      | 1.54E-22 | -0.682647938 | 0.99  | 0.895 | 3.53E-18 | 17 |
| FYB.15       | 2.41E-22 | -1.756851875 | 0.15  | 0.464 | 5.54E-18 | 17 |
| RPL31.13     | 3.09E-22 | -0.714299839 | 0.995 | 0.906 | 7.10E-18 | 17 |
| ACTB.12      | 3.46E-22 | 0.502574176  | 1     | 0.928 | 7.94E-18 | 17 |
| BTG1.16      | 4.46E-22 | -1.351661357 | 0.927 | 0.841 | 1.02E-17 | 17 |
| RPL13A.11    | 4.79E-22 | -0.516919179 | 1     | 0.962 | 1.10E-17 | 17 |
| S100A10.10   | 1.11E-21 | -1.82752156  | 0.409 | 0.613 | 2.55E-17 | 17 |
| RPS26.12     | 4.34E-21 | -0.780441608 | 0.969 | 0.869 | 9.97E-17 | 17 |
| CD69.16      | 5.92E-21 | -2.582527879 | 0.264 | 0.532 | 1.36E-16 | 17 |
| CYTIP.15     | 7.92E-21 | -1.783681361 | 0.187 | 0.479 | 1.82E-16 | 17 |

|                 |          |              |       |       |          |    |
|-----------------|----------|--------------|-------|-------|----------|----|
| TXNIP.12        | 1.01E-20 | -1.63866069  | 0.803 | 0.763 | 2.33E-16 | 17 |
| MAPRE1          | 2.75E-20 | 0.508225188  | 0.446 | 0.18  | 6.32E-16 | 17 |
| SLA.14          | 6.57E-20 | -1.558286551 | 0.093 | 0.403 | 1.51E-15 | 17 |
| CD3E.16         | 1.35E-19 | -1.785739905 | 0.104 | 0.402 | 3.10E-15 | 17 |
| RPS17.7         | 1.76E-19 | -0.630316928 | 0.979 | 0.897 | 4.05E-15 | 17 |
| CD53.11         | 2.20E-19 | -1.488048461 | 0.192 | 0.475 | 5.06E-15 | 17 |
| RPS27A.11       | 2.97E-19 | -0.521425738 | 0.995 | 0.939 | 6.83E-15 | 17 |
| STK4.13         | 3.80E-19 | -1.625857388 | 0.192 | 0.476 | 8.72E-15 | 17 |
| RPSA.9          | 5.92E-19 | -0.915308116 | 0.933 | 0.802 | 1.36E-14 | 17 |
| CELF2.13        | 1.50E-18 | -1.544569344 | 0.161 | 0.43  | 3.45E-14 | 17 |
| CD74.12         | 1.73E-18 | -2.208292313 | 0.85  | 0.793 | 3.98E-14 | 17 |
| DUSP2.16        | 3.22E-18 | -2.324075998 | 0.166 | 0.435 | 7.41E-14 | 17 |
| TRAC.17         | 4.61E-18 | -2.198427064 | 0.171 | 0.436 | 1.06E-13 | 17 |
| JUN.11          | 4.82E-18 | 0.889543266  | 0.902 | 0.689 | 1.11E-13 | 17 |
| RPL21.8         | 1.10E-17 | -0.516704547 | 0.995 | 0.951 | 2.52E-13 | 17 |
| CCL5.16         | 1.15E-17 | -2.967741365 | 0.394 | 0.564 | 2.65E-13 | 17 |
| CD52.13         | 1.84E-17 | -2.167300966 | 0.378 | 0.551 | 4.22E-13 | 17 |
| CD3D.17         | 2.31E-17 | -2.057265269 | 0.249 | 0.478 | 5.31E-13 | 17 |
| SH3BGR1.13      | 2.43E-17 | -1.380850164 | 0.648 | 0.682 | 5.57E-13 | 17 |
| FOSB.8          | 3.76E-17 | 0.57567883   | 0.731 | 0.421 | 8.65E-13 | 17 |
| GZMA.16         | 4.02E-17 | -2.27796634  | 0.166 | 0.423 | 9.25E-13 | 17 |
| RPS15.9         | 4.14E-17 | -0.502051905 | 1     | 0.931 | 9.51E-13 | 17 |
| RAC2.15         | 9.38E-17 | -1.393509178 | 0.098 | 0.376 | 2.16E-12 | 17 |
| EVI2B.10        | 9.54E-17 | -1.338549188 | 0.062 | 0.339 | 2.19E-12 | 17 |
| FAU.6           | 3.04E-16 | -0.539413277 | 0.995 | 0.887 | 6.98E-12 | 17 |
| S100A4.15       | 3.04E-16 | -1.328089612 | 0.606 | 0.701 | 6.98E-12 | 17 |
| LSP1.16         | 4.54E-16 | -1.398298539 | 0.192 | 0.438 | 1.04E-11 | 17 |
| CD48.15         | 4.87E-16 | -1.313438432 | 0.114 | 0.379 | 1.12E-11 | 17 |
| LCP1.14         | 4.93E-16 | -1.415596886 | 0.155 | 0.408 | 1.13E-11 | 17 |
| IL2RG.17        | 6.43E-16 | -1.5006807   | 0.119 | 0.376 | 1.48E-11 | 17 |
| RPL36A.10       | 8.20E-16 | -0.937354789 | 0.865 | 0.8   | 1.88E-11 | 17 |
| SAMSN1.10       | 8.73E-16 | -1.469596706 | 0.062 | 0.326 | 2.01E-11 | 17 |
| CST7.15         | 1.02E-15 | -2.042214471 | 0.145 | 0.392 | 2.35E-11 | 17 |
| RPL18.8         | 1.38E-15 | -0.624166689 | 0.959 | 0.869 | 3.18E-11 | 17 |
| SYTL3.15        | 4.56E-15 | -1.319619675 | 0.026 | 0.281 | 1.05E-10 | 17 |
| ACAP1.17        | 1.19E-14 | -1.354213647 | 0.088 | 0.336 | 2.74E-10 | 17 |
| VAMP8.10        | 1.21E-14 | -1.381724076 | 0.259 | 0.464 | 2.77E-10 | 17 |
| ITGB2.14        | 3.99E-14 | -1.349620117 | 0.197 | 0.418 | 9.18E-10 | 17 |
| RPS16.7         | 5.85E-14 | -0.529325836 | 0.984 | 0.89  | 1.34E-09 | 17 |
| CD3G.16         | 9.05E-14 | -1.467310417 | 0.062 | 0.296 | 2.08E-09 | 17 |
| EVI2A.12        | 9.05E-14 | -1.148842412 | 0.047 | 0.283 | 2.08E-09 | 17 |
| RP11-347P5.1.16 | 1.01E-13 | -1.580146759 | 0.145 | 0.379 | 2.33E-09 | 17 |
| KLF6.13         | 1.30E-13 | -1.511032681 | 0.56  | 0.65  | 2.99E-09 | 17 |
| TNFAIP3.16      | 1.61E-13 | -1.688450793 | 0.249 | 0.45  | 3.69E-09 | 17 |
| UCP2.12         | 2.82E-13 | -1.226889886 | 0.119 | 0.35  | 6.48E-09 | 17 |
| HLA-DRB1.14     | 3.68E-13 | -2.465133175 | 0.544 | 0.591 | 8.45E-09 | 17 |
| GIMAP4.12       | 6.69E-13 | -1.245184609 | 0.114 | 0.342 | 1.54E-08 | 17 |
| CLEC2B.10       | 1.94E-12 | -1.206281713 | 0.155 | 0.381 | 4.46E-08 | 17 |
| RPS10.7         | 2.25E-12 | -0.697770836 | 0.907 | 0.785 | 5.16E-08 | 17 |
| TRBC2.16        | 2.33E-12 | -1.792122485 | 0.181 | 0.38  | 5.35E-08 | 17 |
| ID2.12          | 3.49E-12 | -1.587578782 | 0.461 | 0.566 | 8.02E-08 | 17 |
| FOS.15          | 3.92E-12 | 0.530990133  | 0.902 | 0.678 | 9.00E-08 | 17 |
| BIRC3.14        | 4.73E-12 | -1.5355808   | 0.062 | 0.275 | 1.09E-07 | 17 |
| FAM49B.11       | 6.67E-12 | -1.161908393 | 0.135 | 0.343 | 1.53E-07 | 17 |
| ICAM3.15        | 6.84E-12 | -1.066316843 | 0.062 | 0.275 | 1.57E-07 | 17 |
| FXD5.10         | 7.43E-12 | -1.240198773 | 0.337 | 0.483 | 1.71E-07 | 17 |
| STK17A.15       | 8.12E-12 | -1.37285454  | 0.171 | 0.369 | 1.87E-07 | 17 |
| ALOX5AP.13      | 1.35E-11 | -1.581294045 | 0.13  | 0.331 | 3.10E-07 | 17 |

|             |          |              |       |       |             |    |
|-------------|----------|--------------|-------|-------|-------------|----|
| PPP2R5C.13  | 1.74E-11 | -1.295429703 | 0.187 | 0.393 | 4.00E-07    | 17 |
| STK17B.13   | 2.10E-11 | -1.312676028 | 0.212 | 0.403 | 4.83E-07    | 17 |
| CCL4.17     | 2.24E-11 | -2.840795378 | 0.28  | 0.442 | 5.16E-07    | 17 |
| RGS10.11    | 2.27E-11 | -1.196023637 | 0.098 | 0.298 | 5.21E-07    | 17 |
| ITM2A.16    | 2.44E-11 | -1.555760775 | 0.114 | 0.313 | 5.60E-07    | 17 |
| HMGB2.12    | 3.82E-11 | -1.38609283  | 0.337 | 0.478 | 8.78E-07    | 17 |
| CYBA.11     | 4.01E-11 | -1.069469536 | 0.746 | 0.686 | 9.21E-07    | 17 |
| GZMK.17     | 4.70E-11 | -2.567214408 | 0.187 | 0.368 | 1.08E-06    | 17 |
| GIMAP7.15   | 4.81E-11 | -1.27623135  | 0.088 | 0.287 | 1.11E-06    | 17 |
| LTB.15      | 5.29E-11 | -1.720368145 | 0.109 | 0.304 | 1.22E-06    | 17 |
| EMB.13      | 6.78E-11 | -1.031813581 | 0.073 | 0.272 | 1.56E-06    | 17 |
| HLA-DPA1.14 | 8.31E-11 | -2.367782112 | 0.539 | 0.571 | 1.91E-06    | 17 |
| CLEC2D.16   | 1.19E-10 | -1.27145242  | 0.114 | 0.309 | 2.74E-06    | 17 |
| BIN2.12     | 1.28E-10 | -1.017224813 | 0.057 | 0.252 | 2.94E-06    | 17 |
| GPSM3.12    | 2.18E-10 | -1.073534643 | 0.212 | 0.393 | 5.01E-06    | 17 |
| TRAF3IP3.16 | 2.27E-10 | -0.943190017 | 0.062 | 0.258 | 5.21E-06    | 17 |
| TRBC1.16    | 2.82E-10 | -2.072254179 | 0.187 | 0.355 | 6.47E-06    | 17 |
| CD7.14      | 3.15E-10 | -1.514249226 | 0.119 | 0.303 | 7.24E-06    | 17 |
| ATP5E.11    | 3.94E-10 | -0.597383823 | 0.948 | 0.814 | 9.06E-06    | 17 |
| PIK3IP1.16  | 4.62E-10 | -1.225165046 | 0.181 | 0.36  | 1.06E-05    | 17 |
| NDUFA4.7    | 4.77E-10 | -1.051105764 | 0.404 | 0.541 | 1.10E-05    | 17 |
| WIPF1.15    | 1.11E-09 | -1.093744104 | 0.171 | 0.346 | 2.55E-05    | 17 |
| TUBA4A.14   | 2.02E-09 | -1.20936644  | 0.098 | 0.275 | 4.65E-05    | 17 |
| PRDM1.11    | 2.41E-09 | -1.28626831  | 0.119 | 0.294 | 5.54E-05    | 17 |
| LCK.17      | 4.37E-09 | -1.125083639 | 0.124 | 0.29  | 0.000100378 | 17 |
| EVL.16      | 4.65E-09 | -1.193135836 | 0.389 | 0.497 | 0.000106949 | 17 |
| HLA-DPB1.13 | 5.67E-09 | -2.167375451 | 0.705 | 0.631 | 0.000130314 | 17 |
| COTL1.11    | 6.20E-09 | -1.410585046 | 0.326 | 0.436 | 0.000142504 | 17 |
| IL10RA.13   | 6.54E-09 | -0.919289685 | 0.088 | 0.261 | 0.00015031  | 17 |
| CD27.15     | 1.21E-08 | -1.478979516 | 0.109 | 0.27  | 0.00027823  | 17 |
| CD96.17     | 1.23E-08 | -1.057244395 | 0.088 | 0.251 | 0.000283111 | 17 |
| NKG7.17     | 1.44E-08 | -2.465997409 | 0.316 | 0.429 | 0.000331841 | 17 |
| IL7R.15     | 2.03E-08 | -2.036666184 | 0.15  | 0.305 | 0.00046631  | 17 |
| DUSP1.12    | 2.26E-08 | -0.912516035 | 0.876 | 0.792 | 0.000519858 | 17 |
| LITAF.11    | 3.09E-08 | -1.125784204 | 0.228 | 0.369 | 0.000710345 | 17 |
| PRKCH.12    | 3.70E-08 | -0.876380088 | 0.093 | 0.256 | 0.000850122 | 17 |
| OCIAD2.13   | 4.09E-08 | -1.060618655 | 0.104 | 0.263 | 0.000939159 | 17 |
| CDC42SE2.9  | 5.65E-08 | -0.990451337 | 0.161 | 0.317 | 0.001299137 | 17 |
| CTSS.13     | 5.70E-08 | -1.527689288 | 0.233 | 0.365 | 0.001309866 | 17 |
| RPS5.8      | 6.29E-08 | -0.575863758 | 0.933 | 0.84  | 0.00144451  | 17 |
| TPM3.7      | 6.34E-08 | -0.998575275 | 0.342 | 0.455 | 0.001456688 | 17 |
| APOBEC3G.14 | 6.35E-08 | -1.147090895 | 0.119 | 0.274 | 0.001460128 | 17 |
| DOCK8.13    | 6.55E-08 | -0.894624936 | 0.14  | 0.293 | 0.001505577 | 17 |
| FTL.14      | 8.99E-08 | -1.387277306 | 0.99  | 0.936 | 0.00206567  | 17 |
| SARAF.9     | 1.07E-07 | -0.912320615 | 0.819 | 0.676 | 0.002460903 | 17 |
| RPL24.10    | 1.69E-07 | -0.513021923 | 0.984 | 0.851 | 0.003880476 | 17 |
| RGS2.15     | 3.18E-07 | -1.593317395 | 0.207 | 0.337 | 0.007300958 | 17 |
| REL.11      | 3.25E-07 | -1.078060527 | 0.192 | 0.324 | 0.007468355 | 17 |
| OAZ1.11     | 3.30E-07 | -0.691382968 | 0.85  | 0.734 | 0.007579826 | 17 |
| RPLP0.12    | 3.47E-07 | -0.670120943 | 0.938 | 0.842 | 0.007979997 | 17 |
| MYO1F.12    | 3.66E-07 | -0.848860937 | 0.13  | 0.273 | 0.008406631 | 17 |
| DDIT4.11    | 3.81E-07 | -1.38001491  | 0.435 | 0.519 | 0.008758634 | 17 |
| RNASET2.15  | 5.03E-07 | -1.415919544 | 0.254 | 0.362 | 0.011568669 | 17 |
| SAT1.12     | 6.53E-07 | -1.477544548 | 0.694 | 0.63  | 0.015011196 | 17 |
| HLA-DRB5.14 | 8.91E-07 | -2.062360392 | 0.269 | 0.375 | 0.020467686 | 17 |
| HLA-E.15    | 9.56E-07 | -0.576886103 | 0.953 | 0.787 | 0.021966781 | 17 |
| HLA-DMA.12  | 1.10E-06 | -1.342336942 | 0.166 | 0.289 | 0.025375372 | 17 |
| ISG20.12    | 1.46E-06 | -1.082252047 | 0.249 | 0.363 | 0.033620701 | 17 |

|             |          |              |       |       |             |    |
|-------------|----------|--------------|-------|-------|-------------|----|
| HLA-DQB1.13 | 1.94E-06 | -1.887895758 | 0.321 | 0.393 | 0.044533947 | 17 |
| MKI67       | 0        | 2.907919202  | 0.721 | 0.011 | 0           | 18 |
| TOP2A       | 0        | 2.758690053  | 0.65  | 0.012 | 0           | 18 |
| KIAA0101    | 0        | 2.684551259  | 0.732 | 0.031 | 0           | 18 |
| NUSAP1      | 0        | 2.674184871  | 0.727 | 0.032 | 0           | 18 |
| CENPF       | 0        | 2.582304479  | 0.683 | 0.036 | 0           | 18 |
| UBE2C       | 0        | 2.48300096   | 0.574 | 0.007 | 0           | 18 |
| ASPM        | 0        | 2.345713834  | 0.579 | 0.008 | 0           | 18 |
| TYMS        | 0        | 2.194775661  | 0.694 | 0.025 | 0           | 18 |
| BIRC5       | 0        | 2.081189145  | 0.541 | 0.009 | 0           | 18 |
| RRM2        | 0        | 1.913526304  | 0.53  | 0.005 | 0           | 18 |
| TPX2        | 0        | 1.798270984  | 0.541 | 0.01  | 0           | 18 |
| CDK1        | 0        | 1.745753492  | 0.552 | 0.009 | 0           | 18 |
| CCNA2       | 0        | 1.707820849  | 0.514 | 0.009 | 0           | 18 |
| ZWINT       | 0        | 1.668354294  | 0.601 | 0.017 | 0           | 18 |
| CENPM       | 0        | 1.58980198   | 0.574 | 0.028 | 0           | 18 |
| CDKN3       | 0        | 1.496955314  | 0.47  | 0.01  | 0           | 18 |
| MAD2L1      | 0        | 1.490881527  | 0.601 | 0.029 | 0           | 18 |
| CENPU       | 0        | 1.453511516  | 0.568 | 0.014 | 0           | 18 |
| PRC1        | 0        | 1.441510155  | 0.497 | 0.016 | 0           | 18 |
| AURKB       | 0        | 1.423879014  | 0.475 | 0.006 | 0           | 18 |
| CLSPN       | 0        | 1.366523259  | 0.552 | 0.014 | 0           | 18 |
| ASF1B       | 0        | 1.346250084  | 0.552 | 0.01  | 0           | 18 |
| TK1         | 0        | 1.343030846  | 0.443 | 0.012 | 0           | 18 |
| NUF2        | 0        | 1.309348953  | 0.404 | 0.006 | 0           | 18 |
| CDCA8       | 0        | 1.27394813   | 0.361 | 0.004 | 0           | 18 |
| UBE2T       | 0        | 1.175421653  | 0.563 | 0.019 | 0           | 18 |
| CDC20       | 0        | 1.154220972  | 0.301 | 0.003 | 0           | 18 |
| GTSE1       | 0        | 1.142011673  | 0.415 | 0.005 | 0           | 18 |
| FAM111B     | 0        | 1.132849513  | 0.372 | 0.005 | 0           | 18 |
| TCF19       | 0        | 1.132443417  | 0.47  | 0.015 | 0           | 18 |
| KIF15       | 0        | 1.118920376  | 0.383 | 0.003 | 0           | 18 |
| CASC5       | 0        | 1.114675186  | 0.404 | 0.008 | 0           | 18 |
| SPC25       | 0        | 1.112559238  | 0.393 | 0.002 | 0           | 18 |
| CCNB2       | 0        | 1.100260372  | 0.333 | 0.004 | 0           | 18 |
| HIST1H1B    | 0        | 1.073746439  | 0.29  | 0.003 | 0           | 18 |
| CDT1        | 0        | 1.073358616  | 0.432 | 0.009 | 0           | 18 |
| BRCA1       | 0        | 1.064876052  | 0.448 | 0.015 | 0           | 18 |
| KIF23       | 0        | 1.063366015  | 0.344 | 0.002 | 0           | 18 |
| CENPW       | 0        | 1.055758705  | 0.47  | 0.017 | 0           | 18 |
| FEN1        | 0        | 1.053397645  | 0.481 | 0.017 | 0           | 18 |
| RAD51AP1    | 0        | 1.047044819  | 0.437 | 0.01  | 0           | 18 |
| KIFC1       | 0        | 1.032863008  | 0.421 | 0.006 | 0           | 18 |
| DLGAP5      | 0        | 1.01723002   | 0.35  | 0.002 | 0           | 18 |
| KIF11       | 0        | 1.009705231  | 0.339 | 0.008 | 0           | 18 |
| CENPA       | 0        | 0.999753851  | 0.333 | 0.003 | 0           | 18 |
| CKAP2L      | 0        | 0.985111087  | 0.404 | 0.006 | 0           | 18 |
| SPC24       | 0        | 0.982679528  | 0.328 | 0.003 | 0           | 18 |
| KIF2C       | 0        | 0.975423489  | 0.29  | 0.002 | 0           | 18 |
| HJURP       | 0        | 0.947011754  | 0.328 | 0.001 | 0           | 18 |
| CENPN       | 0        | 0.927878083  | 0.437 | 0.012 | 0           | 18 |
| CDCA3       | 0        | 0.925085421  | 0.317 | 0.003 | 0           | 18 |
| CEP55       | 0        | 0.918990608  | 0.426 | 0.011 | 0           | 18 |
| SGOL1       | 0        | 0.908457583  | 0.339 | 0.004 | 0           | 18 |
| ESCO2       | 0        | 0.880495701  | 0.35  | 0.007 | 0           | 18 |
| HMMR        | 0        | 0.855140635  | 0.322 | 0.004 | 0           | 18 |
| CDCA5       | 0        | 0.847205167  | 0.344 | 0.002 | 0           | 18 |
| NCAPG       | 0        | 0.831850158  | 0.317 | 0.005 | 0           | 18 |



|           |           |             |       |       |           |    |
|-----------|-----------|-------------|-------|-------|-----------|----|
| FANCI     | 0         | 0.814370732 | 0.399 | 0.012 | 0         | 18 |
| UHRF1     | 0         | 0.799722289 | 0.344 | 0.006 | 0         | 18 |
| KIF14     | 0         | 0.765882674 | 0.284 | 0.004 | 0         | 18 |
| RAD51     | 0         | 0.765218425 | 0.268 | 0.003 | 0         | 18 |
| TROAP     | 0         | 0.76203194  | 0.295 | 0.003 | 0         | 18 |
| PBK       | 0         | 0.713710934 | 0.279 | 0.001 | 0         | 18 |
| MELK      | 0         | 0.625112514 | 0.284 | 0.003 | 0         | 18 |
| DEPDC1B   | 0         | 0.618206172 | 0.273 | 0.003 | 0         | 18 |
| MCM10     | 0         | 0.60535578  | 0.268 | 0.002 | 0         | 18 |
| MND1      | 0         | 0.6046414   | 0.251 | 0.004 | 0         | 18 |
| CDC45     | 0         | 0.543171993 | 0.251 | 0.002 | 0         | 18 |
| SPAG5     | 0         | 0.503798856 | 0.268 | 0.004 | 0         | 18 |
| SGOL2     | 8.71E-291 | 1.05552345  | 0.421 | 0.017 | 2.00E-286 | 18 |
| KIAA1524  | 2.70E-287 | 0.706158892 | 0.377 | 0.014 | 6.21E-283 | 18 |
| CENPK     | 4.10E-278 | 1.056061195 | 0.475 | 0.024 | 9.42E-274 | 18 |
| NCAPG2    | 4.58E-276 | 0.928985923 | 0.344 | 0.012 | 1.05E-271 | 18 |
| BUB1      | 1.76E-275 | 0.577868626 | 0.284 | 0.007 | 4.04E-271 | 18 |
| ATAD5     | 8.50E-270 | 1.204600596 | 0.53  | 0.031 | 1.95E-265 | 18 |
| SHCBP1    | 4.71E-267 | 0.52471934  | 0.284 | 0.008 | 1.08E-262 | 18 |
| MXD3      | 3.33E-263 | 0.699010641 | 0.328 | 0.011 | 7.64E-259 | 18 |
| GGH       | 5.79E-262 | 1.125788888 | 0.481 | 0.027 | 1.33E-257 | 18 |
| CENPE     | 9.91E-256 | 1.587709221 | 0.492 | 0.029 | 2.28E-251 | 18 |
| STMN1.1   | 1.64E-246 | 3.784544768 | 0.891 | 0.128 | 3.77E-242 | 18 |
| ARHGAP11A | 4.40E-244 | 0.980057117 | 0.388 | 0.018 | 1.01E-239 | 18 |
| FBXO5     | 5.75E-242 | 0.957706751 | 0.35  | 0.014 | 1.32E-237 | 18 |
| NCAPH     | 3.27E-241 | 0.507433582 | 0.257 | 0.007 | 7.51E-237 | 18 |
| ECT2      | 5.82E-229 | 0.726316633 | 0.284 | 0.01  | 1.34E-224 | 18 |
| SMC2      | 1.40E-227 | 1.71488047  | 0.71  | 0.074 | 3.21E-223 | 18 |
| RACGAP1   | 1.87E-224 | 0.746931548 | 0.339 | 0.015 | 4.29E-220 | 18 |
| HELLS     | 7.47E-215 | 1.208646803 | 0.492 | 0.034 | 1.72E-210 | 18 |
| MCM4      | 2.80E-213 | 0.69060459  | 0.344 | 0.016 | 6.44E-209 | 18 |
| CKS1B.1   | 1.77E-210 | 2.08203086  | 0.721 | 0.083 | 4.07E-206 | 18 |
| SAC3D1    | 2.73E-202 | 0.906566897 | 0.372 | 0.02  | 6.28E-198 | 18 |
| EZH2      | 2.70E-201 | 1.379783943 | 0.53  | 0.043 | 6.20E-197 | 18 |
| BRCA2     | 6.49E-201 | 0.9708219   | 0.426 | 0.027 | 1.49E-196 | 18 |
| CHEK1     | 1.01E-200 | 0.579261784 | 0.306 | 0.013 | 2.33E-196 | 18 |
| MCM2      | 1.16E-198 | 0.6146778   | 0.284 | 0.012 | 2.66E-194 | 18 |
| ARHGAP11B | 2.23E-191 | 1.099581793 | 0.443 | 0.031 | 5.13E-187 | 18 |
| GINS2     | 1.16E-190 | 0.611014444 | 0.257 | 0.01  | 2.66E-186 | 18 |
| RMI2      | 2.36E-190 | 0.573549478 | 0.257 | 0.01  | 5.43E-186 | 18 |
| CENPH     | 2.39E-189 | 0.932142068 | 0.421 | 0.028 | 5.50E-185 | 18 |
| ATAD2     | 9.07E-189 | 1.400127147 | 0.585 | 0.056 | 2.09E-184 | 18 |
| CDCA7     | 3.20E-187 | 0.630643942 | 0.262 | 0.01  | 7.37E-183 | 18 |
| AURKA     | 6.68E-181 | 1.074335154 | 0.257 | 0.01  | 1.54E-176 | 18 |
| CCDC34    | 1.24E-180 | 1.014087381 | 0.41  | 0.028 | 2.84E-176 | 18 |
| HMGB3     | 2.45E-178 | 0.932400698 | 0.372 | 0.024 | 5.63E-174 | 18 |
| PCNA      | 6.73E-174 | 2.131749508 | 0.694 | 0.093 | 1.55E-169 | 18 |
| C21orf58  | 7.59E-173 | 0.583974347 | 0.251 | 0.01  | 1.74E-168 | 18 |
| MCM7      | 5.47E-172 | 1.355644156 | 0.508 | 0.047 | 1.26E-167 | 18 |
| PTTG1.1   | 1.20E-169 | 2.076555909 | 0.683 | 0.088 | 2.75E-165 | 18 |
| LMNB1     | 1.20E-166 | 1.316595455 | 0.536 | 0.053 | 2.77E-162 | 18 |
| CDCA4     | 8.08E-165 | 1.015867477 | 0.426 | 0.033 | 1.86E-160 | 18 |
| BARD1     | 1.08E-163 | 0.785535594 | 0.404 | 0.03  | 2.49E-159 | 18 |
| NDC80     | 2.98E-163 | 0.809198005 | 0.366 | 0.024 | 6.85E-159 | 18 |
| DNAJC9    | 7.68E-162 | 1.187608135 | 0.628 | 0.075 | 1.76E-157 | 18 |
| DHFR      | 4.56E-158 | 0.881481687 | 0.393 | 0.03  | 1.05E-153 | 18 |
| DTYMK     | 4.11E-156 | 1.199701556 | 0.525 | 0.055 | 9.45E-152 | 18 |
| FANCD2    | 8.04E-150 | 0.69466772  | 0.279 | 0.015 | 1.85E-145 | 18 |

|               |           |             |       |       |           |    |
|---------------|-----------|-------------|-------|-------|-----------|----|
| NCAPD2        | 1.27E-143 | 0.641210338 | 0.328 | 0.022 | 2.93E-139 | 18 |
| CKS2          | 5.45E-136 | 2.032467865 | 0.585 | 0.081 | 1.25E-131 | 18 |
| WDR76         | 6.62E-136 | 0.675224717 | 0.339 | 0.025 | 1.52E-131 | 18 |
| WHSC1         | 2.41E-133 | 0.83442617  | 0.437 | 0.043 | 5.53E-129 | 18 |
| PHF19         | 3.47E-131 | 0.741200022 | 0.399 | 0.037 | 7.97E-127 | 18 |
| TACC3         | 2.35E-130 | 1.280192999 | 0.519 | 0.063 | 5.41E-126 | 18 |
| H2AFX         | 7.47E-130 | 1.451346508 | 0.519 | 0.064 | 1.72E-125 | 18 |
| MCM6          | 1.69E-129 | 0.666659599 | 0.339 | 0.027 | 3.89E-125 | 18 |
| RRM1          | 6.10E-129 | 0.980079063 | 0.443 | 0.047 | 1.40E-124 | 18 |
| CHAF1A        | 2.72E-126 | 0.65479222  | 0.317 | 0.024 | 6.25E-122 | 18 |
| SNRNP25       | 6.27E-126 | 0.950357687 | 0.492 | 0.058 | 1.44E-121 | 18 |
| MCM3          | 8.59E-124 | 1.091327842 | 0.503 | 0.062 | 1.97E-119 | 18 |
| SMC4.2        | 1.09E-123 | 1.949418419 | 0.732 | 0.144 | 2.50E-119 | 18 |
| KIF20B        | 5.65E-123 | 1.392326915 | 0.563 | 0.077 | 1.30E-118 | 18 |
| RFC3          | 2.21E-118 | 0.585096463 | 0.29  | 0.021 | 5.08E-114 | 18 |
| GMNN          | 1.02E-115 | 0.702273837 | 0.421 | 0.046 | 2.35E-111 | 18 |
| RFC4          | 2.00E-115 | 0.617354296 | 0.328 | 0.028 | 4.60E-111 | 18 |
| TUBB.12       | 2.07E-115 | 3.0815982   | 0.934 | 0.34  | 4.77E-111 | 18 |
| HIRIP3        | 5.98E-115 | 0.847999259 | 0.443 | 0.051 | 1.37E-110 | 18 |
| RP11-545E17.3 | 1.07E-113 | 0.624059855 | 0.306 | 0.024 | 2.46E-109 | 18 |
| BCL2L12       | 1.53E-112 | 0.690870939 | 0.361 | 0.035 | 3.52E-108 | 18 |
| TMEM106C.1    | 1.06E-110 | 1.178013471 | 0.514 | 0.071 | 2.43E-106 | 18 |
| YEATS4        | 3.51E-109 | 1.082133373 | 0.552 | 0.083 | 8.07E-105 | 18 |
| TUBA1B.11     | 2.74E-107 | 3.00733331  | 0.945 | 0.407 | 6.29E-103 | 18 |
| RNASEH2A      | 6.60E-106 | 0.731936133 | 0.399 | 0.045 | 1.52E-101 | 18 |
| HMGB2.13      | 1.10E-105 | 2.827967255 | 0.956 | 0.47  | 2.52E-101 | 18 |
| NCAPD3        | 8.26E-105 | 0.674790293 | 0.35  | 0.035 | 1.90E-100 | 18 |
| LIG1          | 7.70E-102 | 0.72838624  | 0.355 | 0.037 | 1.77E-97  | 18 |
| SKA2          | 1.42E-101 | 1.047107903 | 0.568 | 0.093 | 3.25E-97  | 18 |
| USP1          | 8.81E-100 | 1.131230934 | 0.607 | 0.11  | 2.02E-95  | 18 |
| KIF22         | 1.66E-99  | 0.931663865 | 0.492 | 0.072 | 3.81E-95  | 18 |
| TTF2          | 8.61E-96  | 0.73824243  | 0.388 | 0.046 | 1.98E-91  | 18 |
| VRK1          | 2.51E-95  | 0.705407138 | 0.437 | 0.058 | 5.76E-91  | 18 |
| TMPO.2        | 4.47E-92  | 1.444350718 | 0.661 | 0.145 | 1.03E-87  | 18 |
| CEP152        | 1.47E-89  | 0.610842921 | 0.301 | 0.03  | 3.38E-85  | 18 |
| H2AFZ.5       | 1.86E-88  | 2.360385029 | 0.891 | 0.383 | 4.28E-84  | 18 |
| H2AFV.4       | 3.42E-88  | 1.81195539  | 0.831 | 0.281 | 7.86E-84  | 18 |
| UBE2S         | 5.41E-88  | 0.954485885 | 0.443 | 0.064 | 1.24E-83  | 18 |
| POLD3         | 1.16E-87  | 0.59189043  | 0.339 | 0.039 | 2.66E-83  | 18 |
| FANCA         | 1.08E-86  | 0.500849146 | 0.29  | 0.029 | 2.49E-82  | 18 |
| CDC25B        | 1.16E-86  | 0.703633896 | 0.339 | 0.039 | 2.67E-82  | 18 |
| PXMP2         | 2.27E-85  | 0.573528242 | 0.306 | 0.033 | 5.23E-81  | 18 |
| HIST1H1D      | 2.37E-85  | 1.433970403 | 0.443 | 0.068 | 5.45E-81  | 18 |
| HIST1H4C.2    | 7.16E-85  | 3.805682202 | 0.727 | 0.214 | 1.65E-80  | 18 |
| ANP32E.1      | 3.29E-84  | 1.450403589 | 0.667 | 0.159 | 7.55E-80  | 18 |
| DNMT1         | 3.54E-84  | 1.285414289 | 0.645 | 0.142 | 8.13E-80  | 18 |
| PRIM1         | 1.70E-83  | 0.623954211 | 0.333 | 0.039 | 3.92E-79  | 18 |
| TEX30         | 4.83E-83  | 0.67392     | 0.322 | 0.037 | 1.11E-78  | 18 |
| HMGN2.5       | 2.54E-81  | 2.362268905 | 0.913 | 0.495 | 5.84E-77  | 18 |
| NUDT1         | 1.25E-80  | 1.025965223 | 0.563 | 0.111 | 2.86E-76  | 18 |
| KPNA2         | 1.36E-80  | 1.536798849 | 0.475 | 0.084 | 3.12E-76  | 18 |
| SAE1.1        | 1.43E-79  | 0.831703644 | 0.481 | 0.082 | 3.30E-75  | 18 |
| RPA3.2        | 1.86E-79  | 1.16238783  | 0.71  | 0.179 | 4.28E-75  | 18 |
| HIST2H2AC     | 1.57E-78  | 0.925945483 | 0.328 | 0.041 | 3.60E-74  | 18 |
| CDKN2C.1      | 4.02E-78  | 0.920143861 | 0.437 | 0.07  | 9.23E-74  | 18 |
| TUBB4B.1      | 6.18E-76  | 1.552376365 | 0.601 | 0.137 | 1.42E-71  | 18 |
| RPL39L        | 5.39E-74  | 0.753426447 | 0.344 | 0.046 | 1.24E-69  | 18 |
| SMC1A.1       | 1.27E-73  | 1.084569184 | 0.639 | 0.155 | 2.92E-69  | 18 |

|            |          |             |       |       |          |    |
|------------|----------|-------------|-------|-------|----------|----|
| CKAP2      | 1.35E-73 | 1.020555986 | 0.443 | 0.074 | 3.09E-69 | 18 |
| ACYP1.1    | 7.69E-72 | 0.719710709 | 0.399 | 0.061 | 1.77E-67 | 18 |
| DDX39A     | 9.55E-72 | 1.096699423 | 0.574 | 0.128 | 2.19E-67 | 18 |
| MCM5.1     | 6.61E-71 | 0.886402366 | 0.448 | 0.081 | 1.52E-66 | 18 |
| CARHSP1.4  | 2.42E-69 | 1.130886991 | 0.732 | 0.199 | 5.55E-65 | 18 |
| CBX5       | 3.49E-69 | 0.800906246 | 0.563 | 0.121 | 8.03E-65 | 18 |
| HIST1H1E   | 1.90E-68 | 0.97855167  | 0.311 | 0.042 | 4.36E-64 | 18 |
| MAD2L2     | 3.60E-68 | 0.88906346  | 0.443 | 0.079 | 8.28E-64 | 18 |
| C12orf75.4 | 2.04E-67 | 1.085587784 | 0.634 | 0.151 | 4.69E-63 | 18 |
| RAD51C     | 1.22E-66 | 0.707345785 | 0.388 | 0.063 | 2.81E-62 | 18 |
| WDR34.1    | 1.33E-66 | 0.568391192 | 0.284 | 0.035 | 3.07E-62 | 18 |
| CALM3.7    | 4.65E-66 | 1.370981489 | 0.831 | 0.306 | 1.07E-61 | 18 |
| RBBP7.1    | 7.23E-66 | 1.13981766  | 0.634 | 0.163 | 1.66E-61 | 18 |
| ORC6       | 7.25E-66 | 0.533779541 | 0.399 | 0.064 | 1.67E-61 | 18 |
| PTMA.8     | 4.68E-65 | 1.084077322 | 0.995 | 0.916 | 1.08E-60 | 18 |
| CRIP1.14   | 1.19E-64 | 1.813767264 | 0.798 | 0.287 | 2.73E-60 | 18 |
| HMGB1.11   | 1.28E-64 | 1.757769263 | 0.918 | 0.732 | 2.93E-60 | 18 |
| MZT1       | 8.90E-64 | 1.004591747 | 0.486 | 0.1   | 2.05E-59 | 18 |
| RANBP1.3   | 1.28E-62 | 1.325413871 | 0.76  | 0.263 | 2.94E-58 | 18 |
| TOPBP1     | 2.82E-62 | 0.521780562 | 0.328 | 0.049 | 6.48E-58 | 18 |
| DEK.7      | 1.51E-61 | 1.723298367 | 0.798 | 0.359 | 3.46E-57 | 18 |
| DUT.7      | 9.26E-61 | 1.770258788 | 0.71  | 0.257 | 2.13E-56 | 18 |
| CKAP5      | 1.36E-60 | 0.510846381 | 0.284 | 0.039 | 3.13E-56 | 18 |
| SLBP       | 2.30E-60 | 0.886080208 | 0.557 | 0.135 | 5.28E-56 | 18 |
| SUZ12      | 7.78E-60 | 0.771979125 | 0.459 | 0.094 | 1.79E-55 | 18 |
| FABP5.4    | 1.57E-59 | 1.281927743 | 0.667 | 0.201 | 3.60E-55 | 18 |
| RAD21.2    | 1.02E-58 | 1.463315463 | 0.699 | 0.231 | 2.34E-54 | 18 |
| SMC3.1     | 4.71E-58 | 1.026981335 | 0.672 | 0.205 | 1.08E-53 | 18 |
| MIR155HG.1 | 2.54E-57 | 0.736030204 | 0.372 | 0.064 | 5.83E-53 | 18 |
| PSIP1.3    | 1.47E-56 | 1.018438673 | 0.678 | 0.198 | 3.38E-52 | 18 |
| HN1.4      | 2.85E-56 | 1.413216797 | 0.699 | 0.233 | 6.56E-52 | 18 |
| FAM111A.2  | 3.51E-56 | 1.003167689 | 0.557 | 0.144 | 8.08E-52 | 18 |
| NUCKS1.7   | 6.00E-56 | 1.39397436  | 0.852 | 0.392 | 1.38E-51 | 18 |
| CCDC167.2  | 6.25E-56 | 0.946228049 | 0.628 | 0.169 | 1.44E-51 | 18 |
| EBP        | 2.18E-55 | 0.826971677 | 0.454 | 0.096 | 5.02E-51 | 18 |
| NUP37      | 6.73E-55 | 0.501427992 | 0.322 | 0.052 | 1.55E-50 | 18 |
| ANP32B.6   | 6.88E-55 | 1.585704719 | 0.781 | 0.335 | 1.58E-50 | 18 |
| CBX1.1     | 9.01E-55 | 0.648013588 | 0.459 | 0.1   | 2.07E-50 | 18 |
| RAN.5      | 1.22E-54 | 1.351427295 | 0.858 | 0.42  | 2.81E-50 | 18 |
| HLTF       | 1.46E-53 | 0.572155017 | 0.328 | 0.055 | 3.36E-49 | 18 |
| IDH2.6     | 2.25E-53 | 1.143074817 | 0.727 | 0.254 | 5.18E-49 | 18 |
| LSM2       | 3.33E-53 | 0.79994198  | 0.612 | 0.171 | 7.65E-49 | 18 |
| SIVA1      | 5.47E-53 | 1.016833805 | 0.683 | 0.229 | 1.26E-48 | 18 |
| CDKN2D     | 1.17E-52 | 1.035044652 | 0.311 | 0.051 | 2.68E-48 | 18 |
| SUPT16H    | 2.65E-52 | 0.709512878 | 0.536 | 0.135 | 6.09E-48 | 18 |
| APOBEC3H   | 4.02E-52 | 0.657263452 | 0.333 | 0.056 | 9.24E-48 | 18 |
| HNRNPAB.1  | 6.05E-52 | 0.943565585 | 0.557 | 0.154 | 1.39E-47 | 18 |
| LBR.1      | 9.63E-52 | 0.85873705  | 0.563 | 0.15  | 2.21E-47 | 18 |
| ZDHHC12    | 1.54E-51 | 0.842413922 | 0.475 | 0.113 | 3.54E-47 | 18 |
| HMGXB4     | 2.02E-50 | 0.53373056  | 0.459 | 0.103 | 4.63E-46 | 18 |
| TFDP1      | 5.97E-50 | 0.597524204 | 0.383 | 0.078 | 1.37E-45 | 18 |
| HDAC1.1    | 8.17E-50 | 0.636780004 | 0.519 | 0.129 | 1.88E-45 | 18 |
| LAG3.2     | 1.24E-49 | 0.842539027 | 0.443 | 0.096 | 2.85E-45 | 18 |
| HPRT1      | 1.32E-49 | 0.578635013 | 0.481 | 0.116 | 3.04E-45 | 18 |
| DCTN3.2    | 1.47E-49 | 0.875487548 | 0.661 | 0.205 | 3.37E-45 | 18 |
| HMGNI.6    | 1.74E-49 | 1.232098077 | 0.88  | 0.499 | 4.01E-45 | 18 |
| C19orf48   | 2.90E-49 | 0.510246258 | 0.311 | 0.054 | 6.67E-45 | 18 |
| SH2D1A.2   | 3.04E-49 | 0.88571488  | 0.552 | 0.139 | 6.99E-45 | 18 |

|            |          |             |       |       |          |    |
|------------|----------|-------------|-------|-------|----------|----|
| SNRPD1.1   | 1.31E-48 | 0.823109515 | 0.694 | 0.231 | 3.00E-44 | 18 |
| TNFRSF9.4  | 3.16E-48 | 1.001956058 | 0.437 | 0.097 | 7.27E-44 | 18 |
| MPHOSPH9   | 1.95E-47 | 0.644303131 | 0.366 | 0.073 | 4.49E-43 | 18 |
| HSPB11.1   | 3.41E-47 | 0.748710618 | 0.601 | 0.178 | 7.84E-43 | 18 |
| CEP78      | 3.64E-47 | 0.688686678 | 0.333 | 0.061 | 8.36E-43 | 18 |
| ACTL6A.1   | 8.87E-47 | 0.610552699 | 0.322 | 0.06  | 2.04E-42 | 18 |
| SNRPF.3    | 1.07E-46 | 0.999828034 | 0.776 | 0.31  | 2.46E-42 | 18 |
| LSM4.1     | 4.95E-46 | 1.024709486 | 0.612 | 0.203 | 1.14E-41 | 18 |
| BUB3.12    | 1.17E-45 | 0.940138005 | 0.738 | 0.265 | 2.69E-41 | 18 |
| HDGF       | 1.18E-45 | 0.579354325 | 0.366 | 0.077 | 2.72E-41 | 18 |
| NASP.1     | 2.44E-45 | 0.915205631 | 0.634 | 0.214 | 5.61E-41 | 18 |
| CDK5RAP2   | 3.66E-45 | 0.501616947 | 0.333 | 0.064 | 8.41E-41 | 18 |
| UQCC2      | 4.45E-45 | 0.747429418 | 0.475 | 0.124 | 1.02E-40 | 18 |
| TOX.3      | 6.08E-45 | 0.595732658 | 0.448 | 0.102 | 1.40E-40 | 18 |
| CTCF       | 1.34E-44 | 0.573931282 | 0.432 | 0.102 | 3.08E-40 | 18 |
| SNRPB.3    | 1.51E-44 | 1.114725946 | 0.781 | 0.344 | 3.46E-40 | 18 |
| ACTB.13    | 1.63E-44 | 1.034338679 | 0.967 | 0.928 | 3.75E-40 | 18 |
| STRA13     | 3.33E-44 | 0.889950717 | 0.481 | 0.126 | 7.66E-40 | 18 |
| NUDT21     | 3.61E-44 | 0.632881637 | 0.497 | 0.134 | 8.30E-40 | 18 |
| HNRNPD.3   | 3.72E-44 | 1.034470797 | 0.672 | 0.241 | 8.55E-40 | 18 |
| DUSP4.8    | 8.93E-44 | 1.038492409 | 0.694 | 0.235 | 2.05E-39 | 18 |
| COX8A.6    | 9.22E-44 | 1.114070309 | 0.88  | 0.494 | 2.12E-39 | 18 |
| CDK2AP2.1  | 1.23E-43 | 0.752029818 | 0.541 | 0.154 | 2.84E-39 | 18 |
| MIS18BP1.4 | 2.14E-43 | 0.763524892 | 0.639 | 0.204 | 4.93E-39 | 18 |
| CFL1.6     | 2.99E-43 | 0.963402401 | 0.929 | 0.744 | 6.87E-39 | 18 |
| LSM5.2     | 3.77E-43 | 0.801274815 | 0.639 | 0.215 | 8.67E-39 | 18 |
| PMVK.1     | 5.06E-43 | 0.777825849 | 0.492 | 0.13  | 1.16E-38 | 18 |
| SRSF10.5   | 6.11E-43 | 0.77901357  | 0.689 | 0.241 | 1.40E-38 | 18 |
| BAZ1B.2    | 4.39E-42 | 0.671201064 | 0.546 | 0.161 | 1.01E-37 | 18 |
| HAT1       | 5.17E-42 | 0.500513786 | 0.443 | 0.111 | 1.19E-37 | 18 |
| HIST1H1C.2 | 5.85E-42 | 1.088323323 | 0.464 | 0.127 | 1.34E-37 | 18 |
| SSRP1.1    | 6.35E-42 | 0.671362446 | 0.47  | 0.126 | 1.46E-37 | 18 |
| CEP57      | 1.00E-41 | 0.608036053 | 0.481 | 0.128 | 2.31E-37 | 18 |
| ARPC5L.6   | 2.00E-41 | 0.922810837 | 0.661 | 0.226 | 4.59E-37 | 18 |
| ANXA6.14   | 1.25E-40 | 0.796296463 | 0.694 | 0.244 | 2.87E-36 | 18 |
| ANKRD36C.2 | 1.81E-40 | 0.782512723 | 0.563 | 0.172 | 4.15E-36 | 18 |
| TUBA1C.1   | 1.86E-40 | 0.892681092 | 0.421 | 0.109 | 4.28E-36 | 18 |
| SIT1.4     | 5.05E-40 | 0.517480234 | 0.486 | 0.125 | 1.16E-35 | 18 |
| H2AFY.9    | 7.17E-40 | 1.020483599 | 0.721 | 0.278 | 1.65E-35 | 18 |
| SRRT       | 8.14E-40 | 0.654386226 | 0.355 | 0.08  | 1.87E-35 | 18 |
| PPIA.7     | 1.03E-39 | 1.013435992 | 0.918 | 0.644 | 2.38E-35 | 18 |
| PFN1.11    | 1.52E-39 | 1.071850943 | 0.913 | 0.758 | 3.49E-35 | 18 |
| ACTG1.10   | 2.58E-39 | 1.145907607 | 0.923 | 0.743 | 5.93E-35 | 18 |
| CDKN2A     | 3.90E-39 | 0.512797926 | 0.317 | 0.065 | 8.96E-35 | 18 |
| HNRNPR.6   | 4.36E-39 | 0.843697013 | 0.716 | 0.27  | 1.00E-34 | 18 |
| PPM1G.2    | 4.73E-39 | 0.773297656 | 0.634 | 0.221 | 1.09E-34 | 18 |
| SLC25A5.8  | 5.31E-39 | 0.990538832 | 0.781 | 0.38  | 1.22E-34 | 18 |
| KIF2A.1    | 7.13E-39 | 0.631256231 | 0.448 | 0.119 | 1.64E-34 | 18 |
| FAF1       | 7.77E-39 | 0.685838818 | 0.306 | 0.062 | 1.79E-34 | 18 |
| ARL6IP1.5  | 1.15E-38 | 1.697180039 | 0.705 | 0.316 | 2.64E-34 | 18 |
| ARL6IP6    | 3.83E-38 | 0.550799556 | 0.404 | 0.102 | 8.79E-34 | 18 |
| BTG3.2     | 4.12E-38 | 0.719634979 | 0.557 | 0.169 | 9.46E-34 | 18 |
| CD8B.3     | 9.50E-38 | 0.804398082 | 0.574 | 0.179 | 2.18E-33 | 18 |
| PPP1CA.4   | 9.52E-38 | 0.877970063 | 0.781 | 0.359 | 2.19E-33 | 18 |
| CD8A.3     | 1.19E-37 | 0.917907337 | 0.65  | 0.224 | 2.74E-33 | 18 |
| NONO.1     | 1.71E-37 | 0.632487019 | 0.65  | 0.236 | 3.92E-33 | 18 |
| RAB27A.2   | 1.84E-37 | 0.632901716 | 0.53  | 0.158 | 4.23E-33 | 18 |
| PMF1.3     | 1.99E-37 | 0.580195854 | 0.536 | 0.163 | 4.57E-33 | 18 |

|             |          |              |       |       |          |    |
|-------------|----------|--------------|-------|-------|----------|----|
| NFATC2IP    | 4.55E-37 | 0.519789323  | 0.47  | 0.131 | 1.05E-32 | 18 |
| PSMB2       | 5.24E-37 | 0.82622106   | 0.656 | 0.238 | 1.20E-32 | 18 |
| XPO1.2      | 6.92E-37 | 0.511743558  | 0.492 | 0.144 | 1.59E-32 | 18 |
| HNRNPF.2    | 7.16E-37 | 0.984716952  | 0.754 | 0.35  | 1.65E-32 | 18 |
| SRP9.4      | 8.43E-37 | 0.826795639  | 0.754 | 0.306 | 1.94E-32 | 18 |
| BANF1.2     | 8.48E-37 | 0.803771473  | 0.634 | 0.235 | 1.95E-32 | 18 |
| HNRNPA2B1.8 | 8.82E-37 | 1.011719773  | 0.874 | 0.624 | 2.03E-32 | 18 |
| GZMA.17     | 1.35E-36 | 1.326231573  | 0.803 | 0.414 | 3.10E-32 | 18 |
| ASH2L       | 2.20E-36 | 0.551444035  | 0.284 | 0.058 | 5.06E-32 | 18 |
| HNRNPA3.6   | 4.70E-36 | 1.01248322   | 0.82  | 0.459 | 1.08E-31 | 18 |
| VCAM1.2     | 5.40E-36 | 0.640523851  | 0.377 | 0.093 | 1.24E-31 | 18 |
| DDB2.2      | 7.41E-36 | 0.612275168  | 0.475 | 0.137 | 1.70E-31 | 18 |
| VBP1        | 1.23E-35 | 0.617933584  | 0.481 | 0.142 | 2.82E-31 | 18 |
| CMC2        | 5.43E-35 | 0.525880268  | 0.481 | 0.141 | 1.25E-30 | 18 |
| CBX3.3      | 6.62E-35 | 0.880561524  | 0.738 | 0.339 | 1.52E-30 | 18 |
| SUB1.6      | 7.25E-35 | 1.086520788  | 0.869 | 0.57  | 1.67E-30 | 18 |
| PSMC3.3     | 8.68E-35 | 0.65437469   | 0.574 | 0.198 | 2.00E-30 | 18 |
| CNTRL.3     | 1.13E-34 | 0.784138845  | 0.497 | 0.158 | 2.60E-30 | 18 |
| TAP1.7      | 1.19E-34 | 0.700372077  | 0.656 | 0.241 | 2.73E-30 | 18 |
| COX5A.6     | 2.76E-34 | 0.741546701  | 0.732 | 0.316 | 6.34E-30 | 18 |
| MZT2B.7     | 4.76E-34 | 0.843204029  | 0.776 | 0.356 | 1.09E-29 | 18 |
| RALY        | 4.76E-34 | 0.651741448  | 0.628 | 0.236 | 1.09E-29 | 18 |
| UBE2A.1     | 6.43E-34 | 0.573840603  | 0.503 | 0.163 | 1.48E-29 | 18 |
| PDIA6.5     | 6.52E-34 | 0.723566095  | 0.727 | 0.3   | 1.50E-29 | 18 |
| RUNX3.4     | 8.98E-34 | 0.684000475  | 0.612 | 0.204 | 2.06E-29 | 18 |
| DCXR        | 9.94E-34 | 0.600701086  | 0.503 | 0.156 | 2.28E-29 | 18 |
| PIN1.2      | 1.16E-33 | 0.573202071  | 0.601 | 0.209 | 2.66E-29 | 18 |
| CD82.2      | 2.39E-33 | 0.550441636  | 0.404 | 0.109 | 5.49E-29 | 18 |
| GAPDH.12    | 7.62E-33 | 0.722519935  | 0.956 | 0.865 | 1.75E-28 | 18 |
| PARP1.2     | 9.38E-33 | 0.780691312  | 0.601 | 0.219 | 2.16E-28 | 18 |
| MAPRE1.1    | 1.31E-32 | 0.558837142  | 0.536 | 0.179 | 3.01E-28 | 18 |
| SFPQ.8      | 1.90E-32 | 0.930557197  | 0.71  | 0.306 | 4.37E-28 | 18 |
| MAGOH       | 2.33E-32 | 0.711821841  | 0.568 | 0.199 | 5.36E-28 | 18 |
| SNRPD3      | 3.42E-32 | 0.603315789  | 0.634 | 0.234 | 7.86E-28 | 18 |
| APOBEC3C.3  | 3.83E-32 | 0.702300496  | 0.568 | 0.194 | 8.81E-28 | 18 |
| ILF2        | 7.23E-32 | 0.654594458  | 0.525 | 0.181 | 1.66E-27 | 18 |
| FTL.15      | 1.00E-31 | -1.644100491 | 0.929 | 0.937 | 2.31E-27 | 18 |
| CORO1A.14   | 1.04E-31 | 1.13782345   | 0.847 | 0.561 | 2.40E-27 | 18 |
| PSMB9.9     | 1.19E-31 | 0.871928115  | 0.831 | 0.479 | 2.72E-27 | 18 |
| RPL34.11    | 1.55E-31 | -0.767190566 | 0.978 | 0.953 | 3.55E-27 | 18 |
| SRSF2.12    | 2.09E-31 | 0.910318083  | 0.798 | 0.418 | 4.80E-27 | 18 |
| HSD17B10    | 5.43E-31 | 0.560199946  | 0.53  | 0.178 | 1.25E-26 | 18 |
| RAC2.16     | 1.16E-30 | 0.907349186  | 0.76  | 0.367 | 2.66E-26 | 18 |
| EIF4A3.1    | 1.46E-30 | 0.512218134  | 0.497 | 0.165 | 3.35E-26 | 18 |
| BLVRA.2     | 1.90E-30 | 0.636241959  | 0.448 | 0.139 | 4.37E-26 | 18 |
| RPL13.9     | 4.26E-30 | -0.724451212 | 0.973 | 0.965 | 9.78E-26 | 18 |
| KPNB1       | 6.75E-30 | 0.523024157  | 0.601 | 0.224 | 1.55E-25 | 18 |
| HNRNPM.4    | 7.12E-30 | 0.795908999  | 0.689 | 0.314 | 1.64E-25 | 18 |
| SNRPG.5     | 7.49E-30 | 0.741321721  | 0.721 | 0.353 | 1.72E-25 | 18 |
| RPS14.10    | 8.11E-30 | -0.721857326 | 0.967 | 0.946 | 1.86E-25 | 18 |
| NUCB2.2     | 8.58E-30 | 0.710231773  | 0.497 | 0.167 | 1.97E-25 | 18 |
| RHEB.3      | 9.83E-30 | 0.706382002  | 0.585 | 0.228 | 2.26E-25 | 18 |
| PMAIP1.6    | 1.14E-29 | 1.00560045   | 0.546 | 0.198 | 2.62E-25 | 18 |
| LSM3.3      | 1.27E-29 | 0.621702482  | 0.634 | 0.252 | 2.92E-25 | 18 |
| APOBEC3G.15 | 1.57E-29 | 0.835652682  | 0.645 | 0.266 | 3.61E-25 | 18 |
| SPN.3       | 1.70E-29 | 0.592746572  | 0.475 | 0.154 | 3.91E-25 | 18 |
| NDUFC2.7    | 2.30E-29 | 0.677004891  | 0.694 | 0.29  | 5.27E-25 | 18 |
| SRSF3.3     | 2.77E-29 | 0.799701876  | 0.781 | 0.417 | 6.36E-25 | 18 |

|                |          |              |       |       |          |    |
|----------------|----------|--------------|-------|-------|----------|----|
| STAG1          | 2.88E-29 | 0.663279897  | 0.383 | 0.109 | 6.62E-25 | 18 |
| BLOC1S1.8      | 6.45E-29 | 0.74632216   | 0.716 | 0.342 | 1.48E-24 | 18 |
| CD27.16        | 6.54E-29 | 0.830192191  | 0.645 | 0.262 | 1.50E-24 | 18 |
| HP1BP3.8       | 7.04E-29 | 0.776715206  | 0.656 | 0.28  | 1.62E-24 | 18 |
| NOP56          | 8.16E-29 | 0.563046832  | 0.459 | 0.148 | 1.87E-24 | 18 |
| PSMB8.9        | 1.06E-28 | 0.927322466  | 0.77  | 0.376 | 2.43E-24 | 18 |
| PGAM1.9        | 1.07E-28 | 0.649561393  | 0.749 | 0.356 | 2.45E-24 | 18 |
| CXCR3.1        | 1.08E-28 | 0.596161227  | 0.361 | 0.097 | 2.48E-24 | 18 |
| WNK1.10        | 1.13E-28 | 0.685058434  | 0.617 | 0.244 | 2.60E-24 | 18 |
| SDF2L1.1       | 1.35E-28 | 0.619224374  | 0.47  | 0.157 | 3.10E-24 | 18 |
| TPR.8          | 1.50E-28 | 0.678966009  | 0.694 | 0.303 | 3.44E-24 | 18 |
| YWHAQ.8        | 2.01E-28 | 0.794398985  | 0.732 | 0.344 | 4.62E-24 | 18 |
| HNRNPA0.6      | 2.24E-28 | 0.928785098  | 0.803 | 0.398 | 5.16E-24 | 18 |
| PTPN11         | 3.49E-28 | 0.585267919  | 0.284 | 0.069 | 8.01E-24 | 18 |
| TPM3.8         | 3.59E-28 | 0.763906564  | 0.836 | 0.448 | 8.24E-24 | 18 |
| LAT.4          | 3.93E-28 | 0.50242162   | 0.503 | 0.163 | 9.03E-24 | 18 |
| NDUFB3.3       | 6.34E-28 | 0.56707801   | 0.623 | 0.249 | 1.46E-23 | 18 |
| PLP2.9         | 6.74E-28 | 0.726592954  | 0.678 | 0.29  | 1.55E-23 | 18 |
| PSMB6.4        | 7.86E-28 | 0.653764262  | 0.65  | 0.272 | 1.81E-23 | 18 |
| C9orf142.12    | 1.26E-27 | 0.686538826  | 0.634 | 0.256 | 2.89E-23 | 18 |
| TIMM10         | 1.34E-27 | 0.518353966  | 0.388 | 0.118 | 3.08E-23 | 18 |
| CRTAM.2        | 1.43E-27 | 0.722731669  | 0.339 | 0.092 | 3.28E-23 | 18 |
| WDR1.5         | 1.44E-27 | 0.65720564   | 0.634 | 0.262 | 3.31E-23 | 18 |
| PSMA4.5        | 1.56E-27 | 0.566601612  | 0.727 | 0.319 | 3.59E-23 | 18 |
| TUBA4A.15      | 2.09E-27 | 0.720540376  | 0.667 | 0.267 | 4.80E-23 | 18 |
| GTF3C6.2       | 2.49E-27 | 0.559323888  | 0.508 | 0.181 | 5.73E-23 | 18 |
| LINC00152.11   | 4.33E-27 | 0.594689512  | 0.71  | 0.312 | 9.96E-23 | 18 |
| IFI16.7        | 4.40E-27 | 0.870014107  | 0.82  | 0.476 | 1.01E-22 | 18 |
| SUMO3.1        | 4.76E-27 | 0.551031701  | 0.59  | 0.225 | 1.09E-22 | 18 |
| PSMA5.2        | 4.83E-27 | 0.791363442  | 0.546 | 0.211 | 1.11E-22 | 18 |
| CD3G.17        | 6.95E-27 | 0.626192526  | 0.71  | 0.288 | 1.60E-22 | 18 |
| UBALD2.1       | 8.21E-27 | 0.616031242  | 0.355 | 0.103 | 1.89E-22 | 18 |
| LYST.5         | 9.53E-27 | 0.5608178    | 0.585 | 0.222 | 2.19E-22 | 18 |
| ATP5G3.5       | 1.01E-26 | 0.653682663  | 0.798 | 0.402 | 2.32E-22 | 18 |
| PSME2.7        | 1.13E-26 | 0.842513418  | 0.765 | 0.408 | 2.59E-22 | 18 |
| FAM195B        | 1.48E-26 | 0.522993018  | 0.497 | 0.175 | 3.40E-22 | 18 |
| CYB5B.1        | 2.60E-26 | 0.564429129  | 0.443 | 0.145 | 5.96E-22 | 18 |
| PRPF4B.2       | 2.63E-26 | 0.612985846  | 0.59  | 0.232 | 6.03E-22 | 18 |
| NDUFS6.4       | 4.68E-26 | 0.648663862  | 0.667 | 0.294 | 1.08E-21 | 18 |
| NDUFA2.5       | 5.66E-26 | 0.751866305  | 0.716 | 0.319 | 1.30E-21 | 18 |
| TALDO1.5       | 6.32E-26 | 0.525958883  | 0.628 | 0.258 | 1.45E-21 | 18 |
| CHCHD2.4       | 1.02E-25 | 0.757382443  | 0.874 | 0.606 | 2.35E-21 | 18 |
| TRAC.18        | 1.05E-25 | 0.987891897  | 0.787 | 0.427 | 2.41E-21 | 18 |
| PARK7.10       | 1.33E-25 | 0.721566336  | 0.825 | 0.488 | 3.06E-21 | 18 |
| ITM2A.17       | 2.93E-25 | 0.86196627   | 0.678 | 0.306 | 6.73E-21 | 18 |
| HNRNPA1L2.2    | 3.14E-25 | 0.598933225  | 0.448 | 0.156 | 7.22E-21 | 18 |
| RBX1.6         | 3.20E-25 | 0.763650024  | 0.749 | 0.37  | 7.35E-21 | 18 |
| XRCC5.6        | 3.53E-25 | 0.590583975  | 0.694 | 0.319 | 8.11E-21 | 18 |
| PKM.10         | 3.88E-25 | 0.717577481  | 0.787 | 0.429 | 8.92E-21 | 18 |
| NDUFB11.3      | 4.94E-25 | 0.543882242  | 0.749 | 0.363 | 1.14E-20 | 18 |
| PSMG2.3        | 4.96E-25 | 0.537746416  | 0.563 | 0.22  | 1.14E-20 | 18 |
| NKG7.18        | 6.58E-25 | 0.784016056  | 0.792 | 0.422 | 1.51E-20 | 18 |
| RPL41.13       | 9.03E-25 | -0.616439521 | 0.984 | 0.976 | 2.08E-20 | 18 |
| COX17.10       | 1.00E-24 | 0.500759907  | 0.699 | 0.313 | 2.30E-20 | 18 |
| IFI27L2.6      | 1.11E-24 | 0.549989137  | 0.661 | 0.301 | 2.54E-20 | 18 |
| LCP1.15        | 1.16E-24 | 0.743840974  | 0.76  | 0.399 | 2.67E-20 | 18 |
| RP11-160E2.6.1 | 1.26E-24 | 0.71301342   | 0.399 | 0.131 | 2.90E-20 | 18 |
| GALM.4         | 1.35E-24 | 0.513178072  | 0.464 | 0.161 | 3.09E-20 | 18 |

|                |          |              |       |       |          |    |
|----------------|----------|--------------|-------|-------|----------|----|
| PSMA3.4        | 1.80E-24 | 0.527810205  | 0.546 | 0.214 | 4.13E-20 | 18 |
| ATPIF1.5       | 2.15E-24 | 0.588239807  | 0.798 | 0.415 | 4.94E-20 | 18 |
| RPL10.11       | 4.16E-24 | -0.582369194 | 0.984 | 0.975 | 9.55E-20 | 18 |
| CALM2.7        | 4.67E-24 | 0.910028271  | 0.891 | 0.628 | 1.07E-19 | 18 |
| SET.5          | 4.78E-24 | 0.572612813  | 0.738 | 0.368 | 1.10E-19 | 18 |
| ERH.5          | 5.15E-24 | 0.688356636  | 0.705 | 0.356 | 1.18E-19 | 18 |
| NABP2          | 5.85E-24 | 0.545929311  | 0.268 | 0.069 | 1.34E-19 | 18 |
| RHNO1          | 7.00E-24 | 0.56436441   | 0.273 | 0.072 | 1.61E-19 | 18 |
| CD3D.18        | 7.54E-24 | 0.892752583  | 0.809 | 0.47  | 1.73E-19 | 18 |
| SUMO2.6        | 1.11E-23 | 0.679859104  | 0.852 | 0.604 | 2.56E-19 | 18 |
| XRCC6.3        | 1.16E-23 | 0.675309871  | 0.661 | 0.301 | 2.66E-19 | 18 |
| PTPN7.5        | 1.23E-23 | 0.503454221  | 0.574 | 0.217 | 2.82E-19 | 18 |
| HMG3.5         | 1.36E-23 | 0.601746477  | 0.661 | 0.301 | 3.13E-19 | 18 |
| HNRNPA1.7      | 1.38E-23 | 0.691388553  | 0.929 | 0.775 | 3.16E-19 | 18 |
| RPS27.11       | 1.52E-23 | -0.66178435  | 0.978 | 0.975 | 3.49E-19 | 18 |
| ANXA5.12       | 1.84E-23 | 0.651610657  | 0.721 | 0.347 | 4.23E-19 | 18 |
| UBB.9          | 1.94E-23 | 0.847394617  | 0.907 | 0.717 | 4.47E-19 | 18 |
| PSMD8.6        | 2.77E-23 | 0.512950243  | 0.672 | 0.305 | 6.37E-19 | 18 |
| NAA38.9        | 3.98E-23 | 0.675354957  | 0.623 | 0.281 | 9.14E-19 | 18 |
| RNPS1.7        | 4.04E-23 | 0.5365117    | 0.607 | 0.257 | 9.28E-19 | 18 |
| TSTD1.7        | 4.32E-23 | 0.530117195  | 0.596 | 0.242 | 9.93E-19 | 18 |
| ATP5L.7        | 2.19E-22 | 0.670767231  | 0.885 | 0.672 | 5.02E-18 | 18 |
| RP11-38614.4.2 | 2.59E-22 | 0.613169641  | 0.333 | 0.104 | 5.96E-18 | 18 |
| RPL3.9         | 4.84E-22 | -0.678133351 | 0.934 | 0.932 | 1.11E-17 | 18 |
| ABRACL.9       | 5.24E-22 | 0.57541198   | 0.634 | 0.282 | 1.20E-17 | 18 |
| TMSB4X.9       | 6.93E-22 | 0.542830913  | 0.984 | 0.977 | 1.59E-17 | 18 |
| ARPC2.11       | 7.32E-22 | 0.725236673  | 0.874 | 0.635 | 1.68E-17 | 18 |
| DBI.6          | 7.83E-22 | 0.592169706  | 0.754 | 0.418 | 1.80E-17 | 18 |
| ANAPC11.4      | 1.28E-21 | 0.538638715  | 0.612 | 0.288 | 2.93E-17 | 18 |
| PSMB10.5       | 1.53E-21 | 0.524702434  | 0.568 | 0.242 | 3.52E-17 | 18 |
| THRAP3.4       | 1.76E-21 | 0.506830968  | 0.617 | 0.287 | 4.04E-17 | 18 |
| PTMS.6         | 2.08E-21 | 0.71449835   | 0.552 | 0.238 | 4.79E-17 | 18 |
| ZNF706.4       | 3.75E-21 | 0.631441647  | 0.59  | 0.272 | 8.61E-17 | 18 |
| EEF1A1.11      | 4.12E-21 | -0.546199048 | 0.962 | 0.968 | 9.47E-17 | 18 |
| RPL26.8        | 4.76E-21 | -0.59602763  | 0.973 | 0.935 | 1.09E-16 | 18 |
| SVIP.1         | 5.67E-21 | 0.559667928  | 0.443 | 0.164 | 1.30E-16 | 18 |
| MPDU1          | 6.08E-21 | 0.525571384  | 0.273 | 0.078 | 1.40E-16 | 18 |
| SNRPC.2        | 6.65E-21 | 0.520599753  | 0.486 | 0.191 | 1.53E-16 | 18 |
| COX6C.6        | 8.26E-21 | 0.607109375  | 0.836 | 0.564 | 1.90E-16 | 18 |
| NCL.7          | 8.94E-21 | 0.662029171  | 0.77  | 0.427 | 2.06E-16 | 18 |
| DNAJC8.4       | 1.32E-20 | 0.563705409  | 0.628 | 0.292 | 3.03E-16 | 18 |
| PPP4C.4        | 1.42E-20 | 0.52769299   | 0.574 | 0.247 | 3.27E-16 | 18 |
| ATP5J2.5       | 1.43E-20 | 0.555953293  | 0.792 | 0.427 | 3.29E-16 | 18 |
| RBM8A.4        | 1.78E-20 | 0.538864318  | 0.732 | 0.364 | 4.08E-16 | 18 |
| GNG5.11        | 2.19E-20 | 0.537654129  | 0.699 | 0.347 | 5.02E-16 | 18 |
| ARPC5.9        | 2.19E-20 | 0.660971617  | 0.76  | 0.431 | 5.03E-16 | 18 |
| TPT1.13        | 3.00E-20 | -0.714537943 | 0.94  | 0.923 | 6.91E-16 | 18 |
| PNRC2.1        | 3.43E-20 | 0.526267359  | 0.546 | 0.231 | 7.88E-16 | 18 |
| IL2RG.18       | 3.96E-20 | 0.60380874   | 0.749 | 0.367 | 9.10E-16 | 18 |
| LSM7.2         | 5.45E-20 | 0.511499767  | 0.612 | 0.282 | 1.25E-15 | 18 |
| VDAC1.8        | 5.82E-20 | 0.526178343  | 0.596 | 0.273 | 1.34E-15 | 18 |
| EIF2S2.2       | 6.13E-20 | 0.538060037  | 0.65  | 0.306 | 1.41E-15 | 18 |
| POLR2G.1       | 2.01E-19 | 0.528955888  | 0.557 | 0.24  | 4.63E-15 | 18 |
| RBMX.5         | 2.12E-19 | 0.542015169  | 0.716 | 0.375 | 4.88E-15 | 18 |
| PA2G4.2        | 2.36E-19 | 0.645263354  | 0.683 | 0.375 | 5.42E-15 | 18 |
| NAP1L1.6       | 4.30E-19 | 0.628673606  | 0.852 | 0.561 | 9.89E-15 | 18 |
| RPL13A.12      | 1.22E-18 | -0.502033612 | 0.989 | 0.962 | 2.80E-14 | 18 |
| RPL39.9        | 2.25E-18 | -0.539517081 | 0.973 | 0.944 | 5.18E-14 | 18 |

|             |          |              |       |       |             |    |
|-------------|----------|--------------|-------|-------|-------------|----|
| HLA-A.13    | 2.40E-18 | 0.560633024  | 0.962 | 0.893 | 5.51E-14    | 18 |
| C11orf31.6  | 2.52E-18 | 0.723121193  | 0.656 | 0.323 | 5.78E-14    | 18 |
| BZW1.6      | 3.57E-18 | 0.552151279  | 0.579 | 0.259 | 8.19E-14    | 18 |
| RPL35A.11   | 4.52E-18 | -0.553850805 | 0.94  | 0.917 | 1.04E-13    | 18 |
| TXNIP.13    | 4.72E-18 | -1.293741298 | 0.694 | 0.764 | 1.08E-13    | 18 |
| SPCS2.4     | 5.57E-18 | 0.573721917  | 0.727 | 0.378 | 1.28E-13    | 18 |
| RHOA.13     | 7.14E-18 | 0.526391034  | 0.82  | 0.504 | 1.64E-13    | 18 |
| YBX1.9      | 1.16E-17 | 0.60369607   | 0.885 | 0.667 | 2.67E-13    | 18 |
| GZMK.18     | 1.56E-17 | 0.734245933  | 0.678 | 0.361 | 3.59E-13    | 18 |
| CTSW.4      | 2.04E-17 | 0.541643529  | 0.508 | 0.218 | 4.69E-13    | 18 |
| HNRNPC.6    | 2.26E-17 | 0.622421853  | 0.776 | 0.472 | 5.20E-13    | 18 |
| CKLF.11     | 2.93E-17 | 0.541706118  | 0.689 | 0.359 | 6.73E-13    | 18 |
| CD2.17      | 4.23E-17 | 0.616046042  | 0.792 | 0.452 | 9.72E-13    | 18 |
| ATP5E.12    | 4.30E-17 | 0.501139053  | 0.929 | 0.814 | 9.88E-13    | 18 |
| HNRNPU.6    | 4.31E-17 | 0.517668826  | 0.672 | 0.37  | 9.90E-13    | 18 |
| RPS18.11    | 4.31E-17 | -0.512747111 | 0.978 | 0.959 | 9.90E-13    | 18 |
| HINT1.9     | 5.44E-17 | 0.610684473  | 0.88  | 0.622 | 1.25E-12    | 18 |
| SF3B2.8     | 7.26E-17 | 0.573331205  | 0.634 | 0.311 | 1.67E-12    | 18 |
| RPL9.8      | 7.62E-17 | -0.58513983  | 0.934 | 0.901 | 1.75E-12    | 18 |
| LIMD2.16    | 1.06E-16 | 0.541625558  | 0.634 | 0.306 | 2.44E-12    | 18 |
| DUSP1.13    | 1.57E-16 | -1.143852855 | 0.721 | 0.794 | 3.61E-12    | 18 |
| COTL1.12    | 1.74E-16 | 0.721508378  | 0.727 | 0.43  | 4.00E-12    | 18 |
| CAPZB.8     | 3.17E-16 | 0.609746492  | 0.776 | 0.456 | 7.28E-12    | 18 |
| HLA-F.12    | 3.17E-16 | 0.525616919  | 0.754 | 0.434 | 7.28E-12    | 18 |
| RPL30.7     | 4.24E-16 | -0.556875481 | 0.929 | 0.897 | 9.73E-12    | 18 |
| CD99.12     | 4.40E-16 | 0.52129139   | 0.781 | 0.466 | 1.01E-11    | 18 |
| HSPA8.10    | 5.32E-16 | 0.617879118  | 0.852 | 0.55  | 1.22E-11    | 18 |
| SRSF7.14    | 5.44E-16 | 0.535237421  | 0.842 | 0.541 | 1.25E-11    | 18 |
| FAM3C.4     | 5.60E-16 | 0.568922167  | 0.372 | 0.151 | 1.29E-11    | 18 |
| TRBC2.17    | 7.26E-16 | 0.540370282  | 0.716 | 0.372 | 1.67E-11    | 18 |
| LY6E.9      | 7.88E-16 | 0.508151608  | 0.705 | 0.361 | 1.81E-11    | 18 |
| CALM1.9     | 1.64E-15 | 0.50236945   | 0.842 | 0.593 | 3.76E-11    | 18 |
| RPS25.12    | 1.66E-15 | -0.512135167 | 0.945 | 0.917 | 3.83E-11    | 18 |
| MALAT1.16   | 2.67E-15 | -0.677125548 | 0.978 | 0.983 | 6.14E-11    | 18 |
| SEPT7.10    | 7.08E-15 | 0.560791817  | 0.792 | 0.509 | 1.63E-10    | 18 |
| CLTA.11     | 8.89E-15 | 0.689184321  | 0.579 | 0.287 | 2.04E-10    | 18 |
| PCBP2       | 4.52E-14 | 0.515441127  | 0.765 | 0.456 | 1.04E-09    | 18 |
| FTH1.16     | 7.28E-14 | -1.153566968 | 0.984 | 0.962 | 1.67E-09    | 18 |
| LSP1.17     | 7.49E-14 | 0.604683556  | 0.749 | 0.43  | 1.72E-09    | 18 |
| ARPC1B.10   | 9.37E-14 | 0.614449286  | 0.787 | 0.521 | 2.15E-09    | 18 |
| ITM2B.12    | 1.71E-13 | -0.913601773 | 0.825 | 0.779 | 3.92E-09    | 18 |
| TRBC1.17    | 3.30E-13 | 0.690756841  | 0.623 | 0.35  | 7.59E-09    | 18 |
| NR4A2.14    | 4.45E-13 | 0.635687943  | 0.536 | 0.273 | 1.02E-08    | 18 |
| RPS13.9     | 4.81E-13 | -0.540933987 | 0.907 | 0.878 | 1.11E-08    | 18 |
| TSC22D3.11  | 5.95E-11 | -0.859938756 | 0.699 | 0.782 | 1.37E-06    | 18 |
| PNRC1.10    | 1.42E-09 | -1.019052505 | 0.634 | 0.634 | 3.26E-05    | 18 |
| PFDN5.8     | 6.49E-09 | -0.612684297 | 0.847 | 0.783 | 0.00014907  | 18 |
| JUNB.14     | 1.37E-08 | -1.063085096 | 0.721 | 0.723 | 0.000313831 | 18 |
| DDX5.13     | 5.07E-08 | -0.567573376 | 0.863 | 0.81  | 0.001166162 | 18 |
| FOS.16      | 3.50E-07 | -0.926364251 | 0.639 | 0.682 | 0.008043207 | 18 |
| TOMM7.9     | 4.62E-07 | -0.584322976 | 0.831 | 0.754 | 0.010611318 | 18 |
| RBPJ.11     | 4.67E-07 | 0.505116272  | 0.503 | 0.319 | 0.010720941 | 18 |
| NEAT1.11    | 6.17E-07 | -1.030681527 | 0.852 | 0.752 | 0.014173709 | 18 |
| BTG1.17     | 9.48E-07 | -0.67583641  | 0.918 | 0.841 | 0.021779392 | 18 |
| LINC01320.1 | 0        | 3.581810718  | 0.885 | 0.05  | 0           | 19 |
| C1orf186.2  | 0        | 3.200422804  | 0.742 | 0.05  | 0           | 19 |
| ACSM2B      | 0        | 2.829962486  | 0.566 | 0.021 | 0           | 19 |
| ACSM2A      | 0        | 2.71605844   | 0.566 | 0.016 | 0           | 19 |



|               |           |             |       |       |           |    |
|---------------|-----------|-------------|-------|-------|-----------|----|
| PNCK          | 0         | 2.08630313  | 0.599 | 0.024 | 0         | 19 |
| EMX2.1        | 0         | 2.079445388 | 0.593 | 0.026 | 0         | 19 |
| DOC2A.1       | 0         | 1.882856418 | 0.467 | 0.015 | 0         | 19 |
| KCNJ16.1      | 0         | 1.769067174 | 0.527 | 0.016 | 0         | 19 |
| PRUNE2        | 0         | 1.708194613 | 0.462 | 0.014 | 0         | 19 |
| MACROD2.1     | 0         | 1.687857583 | 0.484 | 0.014 | 0         | 19 |
| UGT2A3.1      | 0         | 1.609726855 | 0.44  | 0.013 | 0         | 19 |
| PPP2R3A.1     | 0         | 1.607556381 | 0.522 | 0.021 | 0         | 19 |
| PAX8          | 0         | 1.581795144 | 0.527 | 0.018 | 0         | 19 |
| ELF3          | 0         | 1.578549953 | 0.418 | 0.013 | 0         | 19 |
| PAX2          | 0         | 1.559133984 | 0.5   | 0.01  | 0         | 19 |
| CDHR5         | 0         | 1.535288906 | 0.429 | 0.013 | 0         | 19 |
| ERBB3         | 0         | 1.502114671 | 0.401 | 0.011 | 0         | 19 |
| SLC16A12      | 0         | 1.429064623 | 0.385 | 0.008 | 0         | 19 |
| KIF12         | 0         | 1.268803307 | 0.39  | 0.011 | 0         | 19 |
| DNAH11.1      | 0         | 1.261986102 | 0.363 | 0.011 | 0         | 19 |
| RP11-807H17.1 | 0         | 1.192792221 | 0.368 | 0.008 | 0         | 19 |
| CFB           | 0         | 1.17454073  | 0.407 | 0.01  | 0         | 19 |
| ITGB8         | 0         | 1.16597783  | 0.385 | 0.012 | 0         | 19 |
| AOC1          | 0         | 1.13079173  | 0.346 | 0.01  | 0         | 19 |
| PKHD1         | 0         | 1.119422941 | 0.269 | 0.003 | 0         | 19 |
| AHNAK2        | 0         | 1.078436934 | 0.352 | 0.009 | 0         | 19 |
| SLC39A5       | 0         | 1.030689091 | 0.363 | 0.009 | 0         | 19 |
| PRSS8         | 0         | 0.918605178 | 0.396 | 0.006 | 0         | 19 |
| PROM1         | 0         | 0.853200653 | 0.33  | 0.004 | 0         | 19 |
| HOGA1         | 0         | 0.828913668 | 0.319 | 0.006 | 0         | 19 |
| DCDC2         | 0         | 0.75261485  | 0.286 | 0.006 | 0         | 19 |
| KCNJ15        | 0         | 0.735600486 | 0.33  | 0.009 | 0         | 19 |
| LINC01559     | 0         | 0.720824607 | 0.275 | 0.003 | 0         | 19 |
| MUC1          | 0         | 0.711244092 | 0.302 | 0.007 | 0         | 19 |
| FAM150B       | 0         | 0.688327507 | 0.258 | 0.004 | 0         | 19 |
| NEFL          | 0         | 0.642837848 | 0.297 | 0.006 | 0         | 19 |
| SLC34A2       | 0         | 0.57703769  | 0.258 | 0.002 | 0         | 19 |
| SLC44A4       | 1.11E-302 | 0.929640191 | 0.346 | 0.011 | 2.56E-298 | 19 |
| RAB42         | 2.25E-298 | 1.139355423 | 0.423 | 0.017 | 5.17E-294 | 19 |
| FAM65C        | 4.18E-298 | 0.964351164 | 0.324 | 0.009 | 9.62E-294 | 19 |
| PTPRM.1       | 8.51E-298 | 2.452646234 | 0.599 | 0.037 | 1.96E-293 | 19 |
| HHLA2         | 4.63E-289 | 0.859766556 | 0.313 | 0.009 | 1.06E-284 | 19 |
| HSF4.1        | 1.00E-287 | 1.44764141  | 0.423 | 0.018 | 2.30E-283 | 19 |
| CLDN3         | 2.92E-284 | 0.891699135 | 0.374 | 0.014 | 6.71E-280 | 19 |
| POU5F1        | 3.36E-282 | 1.101384057 | 0.302 | 0.008 | 7.71E-278 | 19 |
| MST1          | 2.21E-280 | 1.221623821 | 0.33  | 0.01  | 5.09E-276 | 19 |
| SLC28A1.1     | 5.09E-278 | 1.077228267 | 0.412 | 0.017 | 1.17E-273 | 19 |
| ARHGEF28      | 5.25E-277 | 1.163294737 | 0.341 | 0.011 | 1.21E-272 | 19 |
| UGT2B7.2      | 5.96E-275 | 1.949670769 | 0.56  | 0.035 | 1.37E-270 | 19 |
| ADAMTS9-AS1   | 3.28E-266 | 0.881385932 | 0.264 | 0.007 | 7.54E-262 | 19 |
| ABCC3.1       | 5.39E-266 | 2.113313485 | 0.577 | 0.039 | 1.24E-261 | 19 |
| TACSTD2       | 5.10E-259 | 0.755144718 | 0.352 | 0.013 | 1.17E-254 | 19 |
| ZNF608.1      | 1.58E-257 | 1.075517529 | 0.308 | 0.01  | 3.64E-253 | 19 |
| CLDN4         | 1.09E-255 | 0.745307034 | 0.341 | 0.013 | 2.51E-251 | 19 |
| SLC39A14.1    | 1.21E-253 | 1.785870539 | 0.511 | 0.031 | 2.79E-249 | 19 |
| RHOBTB1       | 2.07E-253 | 1.14026655  | 0.374 | 0.016 | 4.75E-249 | 19 |
| TNFRSF11B     | 2.64E-253 | 0.777631917 | 0.319 | 0.011 | 6.06E-249 | 19 |
| CDK18.1       | 3.13E-253 | 1.702749556 | 0.495 | 0.029 | 7.19E-249 | 19 |
| PLCB4         | 3.75E-252 | 1.795762998 | 0.368 | 0.015 | 8.61E-248 | 19 |
| SLC6A8        | 1.14E-251 | 0.851810014 | 0.33  | 0.012 | 2.62E-247 | 19 |
| ABHD11-AS1    | 7.57E-251 | 0.640377685 | 0.253 | 0.006 | 1.74E-246 | 19 |
| SLC17A3.2     | 8.82E-249 | 2.462108812 | 0.566 | 0.04  | 2.03E-244 | 19 |

|              |           |             |       |       |           |    |
|--------------|-----------|-------------|-------|-------|-----------|----|
| EGFR.1       | 1.22E-246 | 1.351755072 | 0.451 | 0.025 | 2.80E-242 | 19 |
| HPN          | 1.38E-246 | 0.836189187 | 0.396 | 0.018 | 3.17E-242 | 19 |
| GATM-AS1.1   | 5.26E-246 | 2.345617776 | 0.39  | 0.018 | 1.21E-241 | 19 |
| CCDC64B      | 6.71E-244 | 0.8078451   | 0.346 | 0.014 | 1.54E-239 | 19 |
| ERRFI1.1     | 7.75E-243 | 2.46141923  | 0.67  | 0.058 | 1.78E-238 | 19 |
| PRKAA2.1     | 1.56E-242 | 1.138482705 | 0.341 | 0.013 | 3.59E-238 | 19 |
| LINC01358    | 4.85E-239 | 1.042680515 | 0.33  | 0.013 | 1.11E-234 | 19 |
| AR           | 3.08E-238 | 0.895653109 | 0.302 | 0.01  | 7.07E-234 | 19 |
| VEGFA.1      | 8.04E-237 | 3.153774004 | 0.764 | 0.082 | 1.85E-232 | 19 |
| CLRN3        | 4.04E-235 | 0.623535249 | 0.313 | 0.011 | 9.28E-231 | 19 |
| BICC1.1      | 3.21E-231 | 1.14111633  | 0.401 | 0.02  | 7.38E-227 | 19 |
| SEMA5B       | 1.11E-229 | 0.902290724 | 0.291 | 0.01  | 2.56E-225 | 19 |
| GAL3ST1      | 1.79E-227 | 1.093474406 | 0.396 | 0.02  | 4.11E-223 | 19 |
| AMN          | 9.31E-227 | 0.671927822 | 0.319 | 0.012 | 2.14E-222 | 19 |
| CAPN12       | 1.98E-223 | 1.704692858 | 0.505 | 0.035 | 4.55E-219 | 19 |
| SLC44A3      | 3.29E-223 | 0.545822745 | 0.275 | 0.009 | 7.56E-219 | 19 |
| FBXO17.1     | 4.12E-223 | 1.228473782 | 0.434 | 0.025 | 9.47E-219 | 19 |
| PPP1R14D.1   | 1.38E-222 | 0.682422317 | 0.308 | 0.012 | 3.17E-218 | 19 |
| TMEM98.1     | 1.08E-221 | 0.585353478 | 0.341 | 0.015 | 2.48E-217 | 19 |
| ASPA         | 1.84E-212 | 0.884827524 | 0.286 | 0.011 | 4.24E-208 | 19 |
| ALPK2        | 1.23E-211 | 0.939167592 | 0.269 | 0.009 | 2.84E-207 | 19 |
| PDZK1.1      | 1.78E-211 | 0.969353584 | 0.418 | 0.024 | 4.09E-207 | 19 |
| C1S.1        | 6.85E-211 | 1.793308312 | 0.527 | 0.042 | 1.57E-206 | 19 |
| PARD6B.1     | 5.41E-210 | 1.201595157 | 0.352 | 0.017 | 1.24E-205 | 19 |
| FAT1.1       | 4.69E-209 | 0.69799712  | 0.302 | 0.012 | 1.08E-204 | 19 |
| HSD3B7.1     | 3.86E-208 | 1.379564012 | 0.44  | 0.028 | 8.87E-204 | 19 |
| SLC3A1.1     | 1.61E-204 | 1.52826854  | 0.478 | 0.034 | 3.71E-200 | 19 |
| MET.1        | 2.00E-202 | 0.937992164 | 0.385 | 0.021 | 4.60E-198 | 19 |
| CDH2.1       | 6.58E-202 | 0.74222119  | 0.319 | 0.014 | 1.51E-197 | 19 |
| RP11-1C1.6.1 | 4.02E-201 | 0.97358122  | 0.363 | 0.019 | 9.23E-197 | 19 |
| MAOA.1       | 8.02E-201 | 0.890392988 | 0.368 | 0.02  | 1.84E-196 | 19 |
| DMKN         | 2.72E-200 | 1.065758712 | 0.363 | 0.019 | 6.25E-196 | 19 |
| EMX2OS       | 2.70E-197 | 0.761017416 | 0.319 | 0.015 | 6.19E-193 | 19 |
| EGFR-AS1.1   | 1.75E-195 | 0.837608159 | 0.297 | 0.013 | 4.01E-191 | 19 |
| EPCAM        | 7.29E-195 | 0.559508251 | 0.302 | 0.013 | 1.68E-190 | 19 |
| TSPAN1.1     | 1.80E-194 | 1.933708425 | 0.456 | 0.033 | 4.13E-190 | 19 |
| ACY3         | 6.52E-193 | 0.79149773  | 0.319 | 0.015 | 1.50E-188 | 19 |
| STARD4-AS1   | 9.42E-190 | 1.328150743 | 0.28  | 0.012 | 2.16E-185 | 19 |
| SLC16A4      | 2.28E-188 | 1.113622849 | 0.429 | 0.029 | 5.24E-184 | 19 |
| RERG.2       | 4.07E-188 | 0.858908936 | 0.379 | 0.023 | 9.36E-184 | 19 |
| MVK          | 5.64E-188 | 0.732834739 | 0.357 | 0.02  | 1.30E-183 | 19 |
| SLPI.1       | 1.60E-187 | 2.492941978 | 0.44  | 0.032 | 3.69E-183 | 19 |
| EVA1A.1      | 1.61E-187 | 0.641630265 | 0.286 | 0.012 | 3.71E-183 | 19 |
| ADAMTS9-AS2  | 2.97E-186 | 0.808281508 | 0.264 | 0.01  | 6.81E-182 | 19 |
| ANPEP        | 3.30E-186 | 1.973275535 | 0.511 | 0.045 | 7.58E-182 | 19 |
| TMEM139      | 1.47E-184 | 0.767016692 | 0.297 | 0.014 | 3.39E-180 | 19 |
| SLC4A4       | 9.62E-184 | 0.726670961 | 0.297 | 0.014 | 2.21E-179 | 19 |
| KRT19.1      | 3.01E-183 | 3.093774456 | 0.571 | 0.059 | 6.92E-179 | 19 |
| CLEC18C.1    | 6.80E-183 | 0.654710439 | 0.269 | 0.011 | 1.56E-178 | 19 |
| COBLL1.1     | 1.08E-180 | 0.780751195 | 0.313 | 0.016 | 2.47E-176 | 19 |
| DIXDC1.1     | 2.21E-178 | 0.902078819 | 0.379 | 0.024 | 5.07E-174 | 19 |
| SLC22A2.1    | 2.24E-176 | 0.78030469  | 0.352 | 0.021 | 5.14E-172 | 19 |
| RP11-1C1.4   | 2.42E-176 | 0.610596642 | 0.258 | 0.011 | 5.57E-172 | 19 |
| MTMR11.1     | 4.72E-174 | 1.310345521 | 0.357 | 0.022 | 1.08E-169 | 19 |
| DDR1         | 2.14E-171 | 0.526440954 | 0.275 | 0.013 | 4.92E-167 | 19 |
| CDH6.1       | 8.98E-170 | 1.085797355 | 0.407 | 0.029 | 2.06E-165 | 19 |
| CP.1         | 6.36E-169 | 1.816688329 | 0.467 | 0.04  | 1.46E-164 | 19 |
| HIF1A-AS2    | 8.14E-168 | 1.3212961   | 0.258 | 0.011 | 1.87E-163 | 19 |

|               |           |             |       |       |           |    |
|---------------|-----------|-------------|-------|-------|-----------|----|
| CA9.1         | 4.18E-167 | 1.473535469 | 0.484 | 0.042 | 9.60E-163 | 19 |
| SLC47A1       | 1.22E-166 | 1.091075746 | 0.275 | 0.013 | 2.80E-162 | 19 |
| CFI           | 1.96E-164 | 0.857257794 | 0.407 | 0.03  | 4.50E-160 | 19 |
| ACMSD         | 2.88E-164 | 0.522487955 | 0.28  | 0.014 | 6.62E-160 | 19 |
| CUBN          | 1.04E-163 | 1.266021092 | 0.319 | 0.018 | 2.40E-159 | 19 |
| ZNF320        | 1.18E-163 | 1.031192056 | 0.291 | 0.015 | 2.71E-159 | 19 |
| EPS8L2        | 2.97E-161 | 1.279300609 | 0.505 | 0.048 | 6.82E-157 | 19 |
| DLG5          | 3.54E-161 | 0.719561884 | 0.264 | 0.012 | 8.13E-157 | 19 |
| CLDN7         | 4.07E-161 | 1.214202041 | 0.396 | 0.03  | 9.36E-157 | 19 |
| NR1H4.1       | 4.26E-161 | 0.524309918 | 0.308 | 0.017 | 9.80E-157 | 19 |
| RP11-14N7.2.1 | 8.98E-161 | 1.507391214 | 0.467 | 0.041 | 2.06E-156 | 19 |
| S100A1.1      | 9.26E-159 | 1.799171847 | 0.44  | 0.037 | 2.13E-154 | 19 |
| FN3K          | 1.89E-158 | 0.785456595 | 0.297 | 0.016 | 4.34E-154 | 19 |
| CA12.1        | 4.17E-158 | 1.223942199 | 0.423 | 0.034 | 9.58E-154 | 19 |
| ACSM5         | 1.93E-157 | 0.910069005 | 0.324 | 0.02  | 4.43E-153 | 19 |
| SERPINF2.2    | 7.25E-157 | 1.421027735 | 0.484 | 0.048 | 1.67E-152 | 19 |
| ENPEP.2       | 2.39E-153 | 1.14061764  | 0.401 | 0.032 | 5.50E-149 | 19 |
| KBTBD11       | 2.64E-153 | 0.679398348 | 0.286 | 0.016 | 6.07E-149 | 19 |
| MYEOV.1       | 6.30E-153 | 0.55055851  | 0.302 | 0.017 | 1.45E-148 | 19 |
| SERINC2.1     | 2.58E-152 | 0.956477687 | 0.412 | 0.034 | 5.94E-148 | 19 |
| HILPDA.3      | 8.02E-152 | 2.502556833 | 0.753 | 0.119 | 1.84E-147 | 19 |
| HSPB8.1       | 4.01E-149 | 0.82603695  | 0.368 | 0.027 | 9.21E-145 | 19 |
| HOOK2         | 2.16E-148 | 1.697550591 | 0.533 | 0.059 | 4.97E-144 | 19 |
| REG1A.1       | 1.53E-146 | 3.252501138 | 0.489 | 0.053 | 3.52E-142 | 19 |
| CNKS3.1       | 6.92E-146 | 1.258711894 | 0.418 | 0.036 | 1.59E-141 | 19 |
| GNG12.2       | 8.95E-143 | 0.662548558 | 0.341 | 0.024 | 2.06E-138 | 19 |
| SLC6A13       | 3.74E-142 | 0.721152003 | 0.297 | 0.018 | 8.59E-138 | 19 |
| CTHRC1.2      | 1.28E-141 | 0.916114471 | 0.385 | 0.031 | 2.95E-137 | 19 |
| LINC00887.1   | 6.62E-141 | 1.173960889 | 0.291 | 0.018 | 1.52E-136 | 19 |
| MIOX          | 1.10E-140 | 0.982165384 | 0.286 | 0.017 | 2.53E-136 | 19 |
| MIR210HG.1    | 5.16E-140 | 0.640610319 | 0.297 | 0.019 | 1.19E-135 | 19 |
| LRRC41.1      | 2.36E-138 | 2.109417211 | 0.566 | 0.074 | 5.43E-134 | 19 |
| CFH           | 2.59E-138 | 0.576037683 | 0.324 | 0.022 | 5.96E-134 | 19 |
| TMEM45A.1     | 3.31E-138 | 0.772100044 | 0.308 | 0.02  | 7.60E-134 | 19 |
| PPP1R3C       | 4.01E-138 | 0.816357307 | 0.275 | 0.016 | 9.23E-134 | 19 |
| WFDC2.2       | 1.03E-137 | 2.005192335 | 0.445 | 0.045 | 2.36E-133 | 19 |
| PAWR.1        | 1.06E-137 | 0.81941442  | 0.302 | 0.02  | 2.44E-133 | 19 |
| HRCT1         | 1.80E-137 | 0.610153318 | 0.302 | 0.02  | 4.15E-133 | 19 |
| PLOD2.1       | 3.07E-137 | 1.295901053 | 0.434 | 0.041 | 7.07E-133 | 19 |
| AEBP1.1       | 3.70E-137 | 0.794366582 | 0.346 | 0.026 | 8.49E-133 | 19 |
| C1R.2         | 5.63E-137 | 1.540094866 | 0.467 | 0.049 | 1.29E-132 | 19 |
| RAB3IP        | 3.84E-136 | 1.238747799 | 0.39  | 0.034 | 8.82E-132 | 19 |
| ZNF395.1      | 8.11E-136 | 1.101217413 | 0.357 | 0.028 | 1.86E-131 | 19 |
| ANGPTL4.5     | 1.29E-134 | 2.786969699 | 0.808 | 0.159 | 2.97E-130 | 19 |
| LMO7          | 1.54E-134 | 1.067103713 | 0.385 | 0.033 | 3.53E-130 | 19 |
| PLEKHA5.1     | 6.81E-133 | 1.543416712 | 0.429 | 0.042 | 1.56E-128 | 19 |
| SLC37A4.1     | 9.79E-132 | 1.172711502 | 0.467 | 0.05  | 2.25E-127 | 19 |
| ITGA3         | 1.04E-130 | 0.922118829 | 0.319 | 0.023 | 2.39E-126 | 19 |
| KISS1R.1      | 8.65E-130 | 0.658339081 | 0.297 | 0.02  | 1.99E-125 | 19 |
| GSTA2.1       | 4.55E-129 | 0.941266384 | 0.368 | 0.031 | 1.05E-124 | 19 |
| APOL1         | 3.56E-125 | 1.994830167 | 0.516 | 0.07  | 8.18E-121 | 19 |
| CDCA2.1       | 1.49E-124 | 1.014145791 | 0.324 | 0.025 | 3.42E-120 | 19 |
| C19orf33.2    | 4.22E-124 | 1.883599287 | 0.462 | 0.053 | 9.70E-120 | 19 |
| C11orf54.2    | 1.04E-123 | 1.597152611 | 0.533 | 0.072 | 2.39E-119 | 19 |
| FAM134B.1     | 1.26E-123 | 1.196035692 | 0.401 | 0.039 | 2.89E-119 | 19 |
| ZNF248        | 1.68E-122 | 1.231230492 | 0.341 | 0.029 | 3.87E-118 | 19 |
| SAA2.1        | 1.40E-121 | 3.152976182 | 0.566 | 0.085 | 3.21E-117 | 19 |
| INADL         | 2.01E-120 | 1.501931985 | 0.429 | 0.046 | 4.61E-116 | 19 |

|              |           |              |       |       |           |    |
|--------------|-----------|--------------|-------|-------|-----------|----|
| RDH5         | 2.78E-120 | 0.999392189  | 0.313 | 0.024 | 6.39E-116 | 19 |
| MT1H         | 3.50E-120 | 1.383125899  | 0.258 | 0.017 | 8.05E-116 | 19 |
| CES4A.1      | 6.50E-120 | 1.497940912  | 0.357 | 0.032 | 1.49E-115 | 19 |
| TFPI.3       | 1.34E-119 | 1.476355638  | 0.516 | 0.067 | 3.09E-115 | 19 |
| FAM13A.1     | 3.18E-119 | 1.590185412  | 0.5   | 0.065 | 7.30E-115 | 19 |
| CES2.1       | 4.97E-119 | 1.42628391   | 0.467 | 0.058 | 1.14E-114 | 19 |
| FABP3        | 1.25E-117 | 0.501936831  | 0.269 | 0.018 | 2.87E-113 | 19 |
| PPP1R13L.1   | 2.44E-117 | 0.942851258  | 0.302 | 0.023 | 5.60E-113 | 19 |
| BHMT2.1      | 7.36E-116 | 0.981585722  | 0.297 | 0.023 | 1.69E-111 | 19 |
| PDK1.1       | 3.22E-115 | 1.578434012  | 0.412 | 0.044 | 7.39E-111 | 19 |
| GSTA1.1      | 4.41E-115 | 0.630645512  | 0.28  | 0.02  | 1.01E-110 | 19 |
| ENPP3.1      | 2.83E-112 | 1.050887149  | 0.291 | 0.023 | 6.50E-108 | 19 |
| SAA1.3       | 1.15E-111 | 3.513948681  | 0.637 | 0.124 | 2.65E-107 | 19 |
| AK4.1        | 1.28E-111 | 0.758270961  | 0.357 | 0.033 | 2.94E-107 | 19 |
| PTER         | 6.26E-111 | 1.409023529  | 0.418 | 0.049 | 1.44E-106 | 19 |
| TNFAIP6      | 6.85E-111 | 0.632775985  | 0.275 | 0.02  | 1.57E-106 | 19 |
| GALE         | 2.07E-110 | 0.578151689  | 0.335 | 0.03  | 4.75E-106 | 19 |
| PPP1R16A.1   | 2.17E-109 | 0.601142156  | 0.368 | 0.037 | 4.98E-105 | 19 |
| GGT1         | 3.68E-109 | 0.780122829  | 0.374 | 0.038 | 8.45E-105 | 19 |
| KRT8.3       | 1.95E-108 | 1.677287867  | 0.571 | 0.092 | 4.49E-104 | 19 |
| HAUS7        | 1.48E-105 | 0.860621946  | 0.379 | 0.041 | 3.40E-101 | 19 |
| SDC4.1       | 2.29E-105 | 0.737739533  | 0.341 | 0.033 | 5.26E-101 | 19 |
| CCL28.1      | 2.18E-104 | 0.92240945   | 0.341 | 0.033 | 5.00E-100 | 19 |
| TMEM91.1     | 1.09E-103 | 1.178867557  | 0.462 | 0.061 | 2.50E-99  | 19 |
| CYP3A5       | 5.71E-103 | 0.780082635  | 0.269 | 0.021 | 1.31E-98  | 19 |
| NBL1.1       | 1.26E-102 | 0.738061469  | 0.363 | 0.038 | 2.89E-98  | 19 |
| TCEA3.2      | 1.98E-102 | 0.885734084  | 0.429 | 0.052 | 4.56E-98  | 19 |
| MMP7         | 4.62E-102 | 0.631490568  | 0.253 | 0.019 | 1.06E-97  | 19 |
| KCTD3.1      | 1.00E-101 | 0.94117472   | 0.308 | 0.028 | 2.31E-97  | 19 |
| ENOSF1       | 2.00E-101 | 1.481458616  | 0.478 | 0.067 | 4.59E-97  | 19 |
| FARP1.2      | 9.19E-101 | 0.962391427  | 0.39  | 0.045 | 2.11E-96  | 19 |
| C5orf46.2    | 1.07E-99  | 1.185730397  | 0.368 | 0.041 | 2.46E-95  | 19 |
| TMEM27.2     | 2.17E-99  | 0.518378789  | 0.319 | 0.03  | 4.98E-95  | 19 |
| TGM2.2       | 2.13E-97  | 1.190423595  | 0.434 | 0.057 | 4.89E-93  | 19 |
| RASSF4.3     | 2.21E-97  | 2.129048962  | 0.692 | 0.157 | 5.07E-93  | 19 |
| DYNC2LI1.1   | 3.24E-97  | 0.678611598  | 0.308 | 0.029 | 7.44E-93  | 19 |
| RP11-83A24.2 | 1.27E-96  | 1.397735352  | 0.462 | 0.064 | 2.92E-92  | 19 |
| MT1G.3       | 3.84E-96  | 2.238709241  | 0.418 | 0.056 | 8.83E-92  | 19 |
| RBPMS.3      | 1.98E-95  | 0.884532557  | 0.451 | 0.061 | 4.56E-91  | 19 |
| ENO2.1       | 2.85E-95  | 0.855265158  | 0.374 | 0.042 | 6.55E-91  | 19 |
| TLN2         | 7.68E-95  | 0.664288357  | 0.258 | 0.021 | 1.76E-90  | 19 |
| SMIM24.1     | 1.40E-94  | 0.519978038  | 0.308 | 0.029 | 3.23E-90  | 19 |
| SPINT1.1     | 2.55E-92  | 0.615838288  | 0.341 | 0.038 | 5.86E-88  | 19 |
| TMSB4X.10    | 2.59E-92  | -2.986469976 | 0.874 | 0.978 | 5.95E-88  | 19 |
| TNFRSF12A.1  | 4.41E-91  | 0.811046814  | 0.313 | 0.032 | 1.01E-86  | 19 |
| MACC1.1      | 1.41E-90  | 0.960832874  | 0.313 | 0.032 | 3.23E-86  | 19 |
| MGST1.4      | 2.17E-89  | 1.421011935  | 0.571 | 0.106 | 4.99E-85  | 19 |
| RRAD.1       | 2.56E-89  | 1.049006012  | 0.253 | 0.021 | 5.89E-85  | 19 |
| PPFIBP1.3    | 2.87E-89  | 1.027010188  | 0.39  | 0.049 | 6.59E-85  | 19 |
| P3H2.1       | 1.41E-88  | 1.34886503   | 0.374 | 0.047 | 3.23E-84  | 19 |
| GATM.2       | 3.71E-88  | 1.158679723  | 0.451 | 0.067 | 8.53E-84  | 19 |
| B2M.13       | 3.52E-87  | -2.15460018  | 0.923 | 0.989 | 8.08E-83  | 19 |
| RGS12.1      | 5.56E-87  | 1.294437982  | 0.385 | 0.05  | 1.28E-82  | 19 |
| PTPRF        | 6.90E-87  | 0.635742149  | 0.269 | 0.025 | 1.59E-82  | 19 |
| CALD1.3      | 1.02E-86  | 1.432640142  | 0.681 | 0.142 | 2.35E-82  | 19 |
| TPM1.5       | 1.67E-86  | 2.010650098  | 0.714 | 0.188 | 3.83E-82  | 19 |
| CXCL14.3     | 1.73E-86  | 1.22544116   | 0.423 | 0.06  | 3.99E-82  | 19 |
| ZMYND8       | 2.00E-86  | 2.036577746  | 0.654 | 0.149 | 4.59E-82  | 19 |

|               |          |              |       |       |          |    |
|---------------|----------|--------------|-------|-------|----------|----|
| FNBP1L.1      | 2.84E-86 | 0.622816117  | 0.319 | 0.034 | 6.53E-82 | 19 |
| MXRA7.1       | 3.48E-86 | 0.615183221  | 0.33  | 0.036 | 8.00E-82 | 19 |
| AQP3.1        | 2.52E-85 | 1.177468051  | 0.44  | 0.065 | 5.78E-81 | 19 |
| WDR60.2       | 3.28E-85 | 1.734468092  | 0.544 | 0.1   | 7.54E-81 | 19 |
| RBP5.2        | 3.45E-85 | 0.912243982  | 0.412 | 0.058 | 7.93E-81 | 19 |
| RND3.1        | 5.23E-84 | 0.724743687  | 0.253 | 0.023 | 1.20E-79 | 19 |
| FHL1.2        | 1.40E-83 | 0.82982134   | 0.379 | 0.05  | 3.22E-79 | 19 |
| TMEM37.1      | 5.95E-83 | 0.724393692  | 0.363 | 0.046 | 1.37E-78 | 19 |
| TSPAN12.2     | 9.90E-83 | 0.539919263  | 0.33  | 0.038 | 2.28E-78 | 19 |
| RDH13         | 1.11E-82 | 0.665094081  | 0.269 | 0.026 | 2.55E-78 | 19 |
| ASS1.1        | 1.44E-82 | 0.51829032   | 0.253 | 0.023 | 3.31E-78 | 19 |
| DPCD.1        | 2.06E-82 | 0.503796274  | 0.341 | 0.041 | 4.74E-78 | 19 |
| DEFB1.3       | 2.29E-82 | 2.289812647  | 0.473 | 0.084 | 5.27E-78 | 19 |
| BHLHE41.3     | 4.30E-82 | 1.171967022  | 0.456 | 0.075 | 9.89E-78 | 19 |
| EGLN3.2       | 5.13E-82 | 0.883291694  | 0.445 | 0.065 | 1.18E-77 | 19 |
| OXR1          | 5.38E-82 | 1.664920084  | 0.516 | 0.094 | 1.24E-77 | 19 |
| SORBS2.2      | 2.21E-81 | 1.243550578  | 0.346 | 0.043 | 5.08E-77 | 19 |
| FABP6.2       | 2.81E-81 | 0.702133912  | 0.33  | 0.039 | 6.46E-77 | 19 |
| CD70.1        | 4.13E-81 | 0.93694313   | 0.401 | 0.057 | 9.48E-77 | 19 |
| NFIB.3        | 4.58E-81 | 1.085368158  | 0.445 | 0.067 | 1.05E-76 | 19 |
| PROS1.2       | 7.42E-81 | 0.75815892   | 0.363 | 0.047 | 1.71E-76 | 19 |
| EFNA1.2       | 5.76E-80 | 0.971307799  | 0.423 | 0.064 | 1.32E-75 | 19 |
| KHK.1         | 1.17E-79 | 0.696885663  | 0.368 | 0.049 | 2.70E-75 | 19 |
| PPP1R3B       | 1.26E-79 | 1.091273544  | 0.346 | 0.044 | 2.89E-75 | 19 |
| CCDC146.1     | 1.41E-78 | 0.816623039  | 0.324 | 0.039 | 3.23E-74 | 19 |
| WDR34.2       | 2.02E-78 | 0.600515478  | 0.308 | 0.035 | 4.65E-74 | 19 |
| PRRG4.1       | 9.34E-78 | 0.740178991  | 0.385 | 0.055 | 2.15E-73 | 19 |
| ANK3          | 1.59E-76 | 0.855972555  | 0.302 | 0.035 | 3.65E-72 | 19 |
| NEAT1.12      | 5.01E-76 | 2.719648453  | 0.989 | 0.75  | 1.15E-71 | 19 |
| RPS12.7       | 7.20E-76 | -1.897151956 | 0.709 | 0.941 | 1.65E-71 | 19 |
| RPL21.10      | 7.57E-76 | -1.839092486 | 0.775 | 0.954 | 1.74E-71 | 19 |
| NAT8.2        | 8.45E-76 | 0.796740034  | 0.33  | 0.041 | 1.94E-71 | 19 |
| ZBTB20.4      | 1.40E-75 | 1.560901354  | 0.637 | 0.147 | 3.22E-71 | 19 |
| CMBL.2        | 1.44E-75 | 0.505651719  | 0.39  | 0.055 | 3.31E-71 | 19 |
| RP1-60O19.1.1 | 1.86E-75 | 0.764243553  | 0.275 | 0.029 | 4.27E-71 | 19 |
| TRIP10.1      | 1.16E-74 | 0.694627496  | 0.264 | 0.028 | 2.66E-70 | 19 |
| FGGY          | 1.24E-74 | 0.654099775  | 0.313 | 0.039 | 2.85E-70 | 19 |
| LINC00969.1   | 2.17E-74 | 2.270503525  | 0.665 | 0.168 | 4.99E-70 | 19 |
| CLU.5         | 2.26E-74 | 3.016998216  | 0.654 | 0.192 | 5.19E-70 | 19 |
| CRYZ.1        | 7.00E-74 | 0.890171128  | 0.396 | 0.061 | 1.61E-69 | 19 |
| PDZK1IP1.4    | 7.84E-74 | 2.041433698  | 0.538 | 0.117 | 1.80E-69 | 19 |
| NOL3.2        | 1.13E-73 | 0.847094287  | 0.44  | 0.071 | 2.60E-69 | 19 |
| PTGR1.1       | 1.76E-73 | 0.752859674  | 0.363 | 0.052 | 4.04E-69 | 19 |
| TJP2.1        | 2.90E-73 | 0.642570701  | 0.258 | 0.027 | 6.67E-69 | 19 |
| PTMA.9        | 2.72E-72 | -2.038456984 | 0.588 | 0.922 | 6.25E-68 | 19 |
| RPS29.14      | 3.05E-72 | -2.207426845 | 0.588 | 0.926 | 7.01E-68 | 19 |
| TSPAN4.3      | 1.05E-71 | 1.268433433  | 0.489 | 0.096 | 2.41E-67 | 19 |
| MYO6.1        | 1.38E-71 | 0.895147251  | 0.368 | 0.053 | 3.17E-67 | 19 |
| LACTB2        | 1.80E-71 | 0.858929392  | 0.396 | 0.063 | 4.15E-67 | 19 |
| CKB.1         | 2.83E-71 | 1.000391177  | 0.33  | 0.044 | 6.50E-67 | 19 |
| FAIM.1        | 9.15E-71 | 0.698841683  | 0.297 | 0.036 | 2.10E-66 | 19 |
| EPHX2         | 1.47E-70 | 0.544673699  | 0.286 | 0.033 | 3.39E-66 | 19 |
| LOX.1         | 5.27E-70 | 0.753189403  | 0.313 | 0.04  | 1.21E-65 | 19 |
| YBX3.4        | 5.52E-70 | 1.848924836  | 0.659 | 0.178 | 1.27E-65 | 19 |
| SMPDL3A.1     | 5.64E-70 | 0.588475637  | 0.319 | 0.041 | 1.30E-65 | 19 |
| MUM1.2        | 5.93E-70 | 1.234717347  | 0.478 | 0.09  | 1.36E-65 | 19 |
| TCN2          | 1.64E-69 | 0.865730299  | 0.352 | 0.052 | 3.77E-65 | 19 |
| PILRB.1       | 2.10E-69 | 1.375654692  | 0.495 | 0.097 | 4.82E-65 | 19 |

|                |          |              |       |       |          |    |
|----------------|----------|--------------|-------|-------|----------|----|
| MGRN1          | 2.93E-69 | 1.4703595    | 0.495 | 0.098 | 6.73E-65 | 19 |
| ECHDC2         | 5.98E-69 | 1.28194957   | 0.5   | 0.097 | 1.37E-64 | 19 |
| SYTL2.3        | 9.18E-68 | 1.308275915  | 0.484 | 0.094 | 2.11E-63 | 19 |
| GAMT.2         | 2.34E-67 | 0.776956182  | 0.357 | 0.054 | 5.37E-63 | 19 |
| MGLL.2         | 4.32E-67 | 0.720550644  | 0.407 | 0.067 | 9.93E-63 | 19 |
| RPS27.12       | 7.28E-67 | -1.645166354 | 0.83  | 0.977 | 1.67E-62 | 19 |
| PLEKHA1.2      | 1.59E-66 | 1.567291783  | 0.538 | 0.116 | 3.66E-62 | 19 |
| NDRG1.2        | 3.63E-66 | 1.467789701  | 0.566 | 0.137 | 8.33E-62 | 19 |
| NNMT.18        | 3.86E-66 | 1.978118861  | 0.786 | 0.293 | 8.88E-62 | 19 |
| RPL32.6        | 9.29E-66 | -1.645302128 | 0.67  | 0.93  | 2.13E-61 | 19 |
| ZNF83          | 9.24E-65 | 1.483780304  | 0.484 | 0.098 | 2.12E-60 | 19 |
| RPS4X.12       | 3.01E-64 | -1.59528382  | 0.643 | 0.942 | 6.92E-60 | 19 |
| PLXNB2.1       | 3.77E-64 | 0.527100176  | 0.335 | 0.05  | 8.66E-60 | 19 |
| FSTL3.2        | 4.71E-64 | 0.84563331   | 0.269 | 0.033 | 1.08E-59 | 19 |
| SERPING1.3     | 1.22E-63 | 1.376630478  | 0.478 | 0.104 | 2.80E-59 | 19 |
| CRLS1          | 3.22E-63 | 0.959873448  | 0.412 | 0.075 | 7.39E-59 | 19 |
| CAV2.3         | 5.69E-63 | 0.646256138  | 0.418 | 0.073 | 1.31E-58 | 19 |
| AKAP12.2       | 9.88E-63 | 0.601729272  | 0.308 | 0.043 | 2.27E-58 | 19 |
| FXD2.4         | 1.23E-62 | 1.732861022  | 0.533 | 0.128 | 2.82E-58 | 19 |
| SOD2.14        | 2.66E-62 | 2.338276817  | 0.736 | 0.288 | 6.11E-58 | 19 |
| KRT18.3        | 5.23E-62 | 1.46651599   | 0.473 | 0.101 | 1.20E-57 | 19 |
| C11orf1.1      | 7.07E-62 | 0.534877268  | 0.352 | 0.055 | 1.62E-57 | 19 |
| CNDP2.4        | 1.27E-61 | 1.810004432  | 0.632 | 0.207 | 2.92E-57 | 19 |
| ATP1B1.5       | 2.15E-61 | 1.483743597  | 0.533 | 0.132 | 4.94E-57 | 19 |
| MXI1.1         | 1.55E-60 | 0.827695765  | 0.385 | 0.066 | 3.56E-56 | 19 |
| PLA2G12A       | 2.82E-60 | 0.790487341  | 0.374 | 0.064 | 6.48E-56 | 19 |
| FAM195A        | 1.03E-59 | 0.523386045  | 0.346 | 0.056 | 2.37E-55 | 19 |
| CREB5          | 3.02E-59 | 0.820076901  | 0.258 | 0.033 | 6.93E-55 | 19 |
| SHMT1.1        | 4.36E-59 | 0.539004751  | 0.33  | 0.051 | 1.00E-54 | 19 |
| C11orf49       | 1.34E-58 | 0.514423958  | 0.28  | 0.038 | 3.08E-54 | 19 |
| HSBP1L1.1      | 6.43E-58 | 0.617613801  | 0.335 | 0.053 | 1.48E-53 | 19 |
| FAHD1.1        | 6.71E-58 | 0.674445638  | 0.324 | 0.051 | 1.54E-53 | 19 |
| RPL27A.9       | 2.55E-57 | -1.455610774 | 0.659 | 0.934 | 5.87E-53 | 19 |
| TMEM176A.4     | 3.74E-57 | 1.899846618  | 0.522 | 0.141 | 8.60E-53 | 19 |
| CARS2          | 1.06E-56 | 0.633795879  | 0.297 | 0.044 | 2.44E-52 | 19 |
| NIT2.1         | 5.26E-56 | 0.898190199  | 0.467 | 0.103 | 1.21E-51 | 19 |
| SSPN.3         | 6.67E-56 | 0.832295083  | 0.291 | 0.043 | 1.53E-51 | 19 |
| SH3BP2         | 9.03E-56 | 1.088485594  | 0.401 | 0.077 | 2.08E-51 | 19 |
| ZNF611         | 1.08E-55 | 1.137566863  | 0.286 | 0.042 | 2.49E-51 | 19 |
| WDR13.2        | 1.10E-55 | 0.770668403  | 0.44  | 0.092 | 2.54E-51 | 19 |
| UACA.2         | 1.15E-55 | 0.603718863  | 0.374 | 0.067 | 2.64E-51 | 19 |
| RPS3.13        | 1.25E-55 | -1.477871971 | 0.637 | 0.923 | 2.88E-51 | 19 |
| MT1E.7         | 5.33E-55 | 2.069625255  | 0.571 | 0.168 | 1.22E-50 | 19 |
| INTS3          | 5.91E-55 | 0.828099451  | 0.297 | 0.045 | 1.36E-50 | 19 |
| RARRES2.4      | 6.77E-55 | 1.008778982  | 0.478 | 0.107 | 1.56E-50 | 19 |
| SHMT2.2        | 7.19E-55 | 0.817227126  | 0.39  | 0.074 | 1.65E-50 | 19 |
| RPL15.4        | 8.22E-55 | -1.427600345 | 0.643 | 0.91  | 1.89E-50 | 19 |
| PLAGL1.1       | 3.81E-54 | 0.986798197  | 0.341 | 0.06  | 8.75E-50 | 19 |
| LTBR.2         | 3.97E-54 | 0.965411563  | 0.379 | 0.072 | 9.13E-50 | 19 |
| EVA1C          | 5.12E-54 | 0.531660334  | 0.258 | 0.034 | 1.18E-49 | 19 |
| RPL13A.13      | 6.30E-54 | -1.2353847   | 0.852 | 0.964 | 1.45E-49 | 19 |
| SNHG25.2       | 8.67E-54 | 1.727051109  | 0.478 | 0.122 | 1.99E-49 | 19 |
| ARHGAP29.2     | 1.64E-53 | 0.772847253  | 0.368 | 0.066 | 3.77E-49 | 19 |
| CRYAB.16       | 1.84E-53 | 1.979535798  | 0.676 | 0.254 | 4.24E-49 | 19 |
| RP11-553L6.5.3 | 2.16E-53 | 0.949223432  | 0.308 | 0.049 | 4.97E-49 | 19 |
| ERGIC1.2       | 3.04E-53 | 1.231812188  | 0.505 | 0.127 | 6.99E-49 | 19 |
| IGFBP4.3       | 3.09E-53 | 1.086121799  | 0.478 | 0.113 | 7.09E-49 | 19 |
| PFKP.2         | 3.99E-53 | 1.209260992  | 0.456 | 0.108 | 9.16E-49 | 19 |

|                 |          |              |       |       |          |    |
|-----------------|----------|--------------|-------|-------|----------|----|
| RPS15A.10       | 5.38E-53 | -1.347064198 | 0.687 | 0.937 | 1.24E-48 | 19 |
| RPL34.12        | 7.74E-53 | -1.40060081  | 0.676 | 0.957 | 1.78E-48 | 19 |
| SRGN.15         | 9.74E-53 | -2.400831143 | 0.335 | 0.797 | 2.24E-48 | 19 |
| DST.3           | 1.35E-52 | 1.014553434  | 0.39  | 0.078 | 3.11E-48 | 19 |
| BDH2.1          | 1.49E-52 | 0.670204837  | 0.363 | 0.066 | 3.43E-48 | 19 |
| HLA-C.14        | 1.86E-52 | -1.650369735 | 0.648 | 0.886 | 4.28E-48 | 19 |
| RPLP2.9         | 1.94E-52 | -1.284297536 | 0.736 | 0.947 | 4.46E-48 | 19 |
| AIG1.2          | 2.19E-52 | 0.839340054  | 0.412 | 0.087 | 5.03E-48 | 19 |
| RPL28.12        | 3.82E-51 | -1.339408523 | 0.709 | 0.935 | 8.78E-47 | 19 |
| DHTKD1          | 6.53E-51 | 0.67942139   | 0.286 | 0.044 | 1.50E-46 | 19 |
| ADM.2           | 8.74E-50 | 1.044287033  | 0.478 | 0.113 | 2.01E-45 | 19 |
| CD24.5          | 1.84E-49 | 1.449163402  | 0.577 | 0.173 | 4.23E-45 | 19 |
| ACTB.14         | 3.17E-49 | -1.630998917 | 0.786 | 0.931 | 7.29E-45 | 19 |
| ALDH1A1.2       | 3.30E-49 | 0.534343924  | 0.407 | 0.086 | 7.59E-45 | 19 |
| RPS14.11        | 4.66E-49 | -1.300426313 | 0.698 | 0.95  | 1.07E-44 | 19 |
| TRIP6.2         | 5.87E-49 | 0.550402589  | 0.308 | 0.052 | 1.35E-44 | 19 |
| KIAA1191        | 7.61E-49 | 0.579832698  | 0.357 | 0.068 | 1.75E-44 | 19 |
| SH3YL1          | 7.80E-49 | 0.661638607  | 0.346 | 0.064 | 1.79E-44 | 19 |
| NET1.1          | 1.16E-48 | 0.645534968  | 0.28  | 0.045 | 2.66E-44 | 19 |
| BNIP3.4         | 3.14E-48 | 1.169322865  | 0.495 | 0.129 | 7.21E-44 | 19 |
| RP11-798M19.6.1 | 3.41E-48 | 0.734508506  | 0.385 | 0.078 | 7.84E-44 | 19 |
| ANXA4.6         | 7.47E-48 | 1.308633171  | 0.516 | 0.153 | 1.72E-43 | 19 |
| FAM127B.2       | 1.22E-47 | 0.502699935  | 0.346 | 0.065 | 2.81E-43 | 19 |
| RPL39.10        | 1.32E-47 | -1.345480688 | 0.654 | 0.949 | 3.03E-43 | 19 |
| SLC2A1.1        | 2.01E-47 | 0.648645889  | 0.269 | 0.042 | 4.61E-43 | 19 |
| HLA-B.15        | 2.01E-47 | -1.338476471 | 0.758 | 0.916 | 4.62E-43 | 19 |
| EPS8.3          | 2.17E-47 | 0.664478497  | 0.368 | 0.075 | 4.98E-43 | 19 |
| ATP6V0A1        | 3.43E-47 | 1.079438412  | 0.28  | 0.047 | 7.87E-43 | 19 |
| CLIC4.4         | 4.27E-47 | 0.747181761  | 0.396 | 0.089 | 9.82E-43 | 19 |
| HMGCL.1         | 5.94E-47 | 0.794035867  | 0.396 | 0.084 | 1.37E-42 | 19 |
| NFE2L1.3        | 2.18E-46 | 0.630713705  | 0.379 | 0.079 | 5.02E-42 | 19 |
| FRMD4A.2        | 2.60E-46 | 0.998197999  | 0.352 | 0.071 | 5.97E-42 | 19 |
| MIR4458HG.2     | 2.90E-46 | 0.560521608  | 0.363 | 0.075 | 6.67E-42 | 19 |
| CCND1.3         | 3.11E-46 | 0.836358442  | 0.401 | 0.089 | 7.15E-42 | 19 |
| BTG1.18         | 3.32E-46 | -2.222059947 | 0.621 | 0.845 | 7.62E-42 | 19 |
| FNDC3B.2        | 3.42E-46 | 1.185314245  | 0.418 | 0.097 | 7.86E-42 | 19 |
| RPS27A.13       | 5.52E-46 | -1.161712042 | 0.758 | 0.942 | 1.27E-41 | 19 |
| RPL12.9         | 1.15E-45 | -1.389275836 | 0.599 | 0.915 | 2.65E-41 | 19 |
| JADE1.1         | 1.92E-45 | 0.888813089  | 0.379 | 0.081 | 4.41E-41 | 19 |
| S100A13.4       | 3.25E-45 | 1.067220087  | 0.473 | 0.129 | 7.46E-41 | 19 |
| FAU.8           | 4.06E-45 | -1.358024777 | 0.582 | 0.893 | 9.33E-41 | 19 |
| RASSF7          | 8.20E-45 | 0.52141947   | 0.341 | 0.066 | 1.88E-40 | 19 |
| TMEM176B.4      | 1.21E-44 | 1.506194823  | 0.495 | 0.15  | 2.79E-40 | 19 |
| LARP1B          | 1.47E-44 | 0.717045998  | 0.286 | 0.049 | 3.37E-40 | 19 |
| POMGNT1         | 3.78E-44 | 0.889053767  | 0.253 | 0.041 | 8.69E-40 | 19 |
| RPL14.9         | 4.08E-44 | -1.43093886  | 0.571 | 0.873 | 9.38E-40 | 19 |
| WBP5.4          | 8.14E-44 | 0.565352598  | 0.374 | 0.081 | 1.87E-39 | 19 |
| RPL23A.13       | 8.87E-44 | -1.217415731 | 0.692 | 0.933 | 2.04E-39 | 19 |
| MYO9A           | 9.53E-44 | 0.671659691  | 0.291 | 0.052 | 2.19E-39 | 19 |
| PHYKPL.1        | 9.56E-44 | 1.152979554  | 0.571 | 0.174 | 2.20E-39 | 19 |
| RP11-1000B6.3.1 | 1.28E-43 | 0.944988491  | 0.275 | 0.048 | 2.94E-39 | 19 |
| RAB34.3         | 2.65E-43 | 0.557038859  | 0.368 | 0.082 | 6.10E-39 | 19 |
| ABHD11.1        | 3.11E-43 | 0.508044235  | 0.286 | 0.05  | 7.14E-39 | 19 |
| LGALS3BP.3      | 4.39E-43 | 0.790436972  | 0.407 | 0.098 | 1.01E-38 | 19 |
| VPS13A          | 8.28E-43 | 1.062292652  | 0.385 | 0.087 | 1.90E-38 | 19 |
| MTR             | 3.83E-42 | 0.919818383  | 0.396 | 0.091 | 8.79E-38 | 19 |
| CXCR4.13        | 6.82E-42 | -2.467989801 | 0.478 | 0.779 | 1.57E-37 | 19 |
| BCKDK.1         | 1.22E-40 | 0.819126942  | 0.412 | 0.103 | 2.80E-36 | 19 |

|            |          |              |       |       |          |    |
|------------|----------|--------------|-------|-------|----------|----|
| ANKRD37.1  | 1.79E-40 | 0.64453112   | 0.335 | 0.069 | 4.12E-36 | 19 |
| SMAGP      | 1.88E-40 | 0.543866412  | 0.253 | 0.042 | 4.31E-36 | 19 |
| C5orf45    | 1.96E-40 | 0.601178199  | 0.286 | 0.053 | 4.50E-36 | 19 |
| RBM41      | 2.35E-40 | 0.915613589  | 0.258 | 0.045 | 5.40E-36 | 19 |
| FGD4.3     | 2.72E-40 | 1.018389114  | 0.357 | 0.081 | 6.24E-36 | 19 |
| RPS25.13   | 3.19E-40 | -1.227698213 | 0.654 | 0.921 | 7.32E-36 | 19 |
| RPL37A.4   | 6.99E-40 | -1.207581206 | 0.61  | 0.91  | 1.61E-35 | 19 |
| NPEPPS     | 7.43E-40 | 0.926273152  | 0.418 | 0.107 | 1.71E-35 | 19 |
| SLC16A3.3  | 1.17E-39 | 1.072702636  | 0.516 | 0.167 | 2.68E-35 | 19 |
| EIF3J-AS1  | 1.20E-39 | 0.890304023  | 0.308 | 0.061 | 2.76E-35 | 19 |
| UBA52.6    | 1.86E-39 | -1.283074812 | 0.582 | 0.87  | 4.28E-35 | 19 |
| RNASET2.16 | 4.98E-39 | 1.750362802  | 0.687 | 0.356 | 1.14E-34 | 19 |
| NQO2.2     | 5.49E-39 | 0.648072654  | 0.346 | 0.078 | 1.26E-34 | 19 |
| RPL18A.10  | 6.82E-39 | -1.18268032  | 0.676 | 0.933 | 1.57E-34 | 19 |
| SPINT2.4   | 7.38E-39 | 1.345302123  | 0.456 | 0.146 | 1.70E-34 | 19 |
| SLC25A37.4 | 8.62E-39 | 1.418115934  | 0.5   | 0.15  | 1.98E-34 | 19 |
| SNHG12     | 8.94E-39 | 0.845542158  | 0.368 | 0.085 | 2.05E-34 | 19 |
| KCNQ1OT1.2 | 9.93E-39 | 1.601520635  | 0.379 | 0.093 | 2.28E-34 | 19 |
| GADD45A.2  | 2.84E-38 | 0.697889215  | 0.401 | 0.101 | 6.52E-34 | 19 |
| TPT1.14    | 3.46E-38 | -1.194813109 | 0.725 | 0.926 | 7.96E-34 | 19 |
| ZFP36L2.15 | 3.83E-38 | -2.840302444 | 0.379 | 0.703 | 8.79E-34 | 19 |
| RBM47.4    | 3.94E-38 | 0.708694063  | 0.341 | 0.076 | 9.05E-34 | 19 |
| RPL26.9    | 4.37E-38 | -1.114774607 | 0.676 | 0.939 | 1.00E-33 | 19 |
| RPSA.11    | 5.84E-38 | -1.555195283 | 0.522 | 0.808 | 1.34E-33 | 19 |
| STC1.2     | 1.04E-37 | 0.99298704   | 0.324 | 0.067 | 2.40E-33 | 19 |
| GPX3.6     | 1.08E-37 | 1.389491287  | 0.495 | 0.161 | 2.49E-33 | 19 |
| ARHGDIB.12 | 1.10E-37 | -1.974111139 | 0.253 | 0.678 | 2.52E-33 | 19 |
| BIRC3.15   | 1.42E-37 | 2.536089763  | 0.621 | 0.267 | 3.27E-33 | 19 |
| CYB5R3.5   | 1.48E-37 | 1.090113536  | 0.527 | 0.182 | 3.39E-33 | 19 |
| HCFC1R1.4  | 2.30E-37 | 0.795048615  | 0.434 | 0.124 | 5.28E-33 | 19 |
| CD2AP      | 2.61E-37 | 0.758440389  | 0.346 | 0.079 | 6.01E-33 | 19 |
| ISOC2      | 7.53E-37 | 0.61846745   | 0.374 | 0.093 | 1.73E-32 | 19 |
| LIMA1.2    | 7.97E-37 | 0.725631988  | 0.357 | 0.082 | 1.83E-32 | 19 |
| VCAM1.3    | 1.38E-36 | 0.784569199  | 0.379 | 0.093 | 3.17E-32 | 19 |
| RPS26.13   | 1.85E-36 | -1.260718296 | 0.593 | 0.874 | 4.24E-32 | 19 |
| RPS16.9    | 2.40E-36 | -1.176949952 | 0.621 | 0.895 | 5.51E-32 | 19 |
| PTPRC.16   | 2.56E-36 | -2.205413493 | 0.17  | 0.622 | 5.88E-32 | 19 |
| IRF7.1     | 2.75E-36 | 0.592776438  | 0.357 | 0.084 | 6.32E-32 | 19 |
| RPL30.8    | 5.05E-36 | -1.132114294 | 0.621 | 0.901 | 1.16E-31 | 19 |
| HPS4.1     | 5.08E-36 | 1.293346918  | 0.357 | 0.088 | 1.17E-31 | 19 |
| NUPR1.5    | 5.70E-36 | 0.769626241  | 0.451 | 0.13  | 1.31E-31 | 19 |
| TMA7.11    | 7.51E-36 | -1.867516476 | 0.374 | 0.7   | 1.73E-31 | 19 |
| QTRT1.1    | 8.43E-36 | 0.766177457  | 0.352 | 0.085 | 1.94E-31 | 19 |
| RPS15.11   | 8.73E-36 | -1.044638637 | 0.703 | 0.935 | 2.01E-31 | 19 |
| ASPH.4     | 9.00E-36 | 0.86847202   | 0.385 | 0.098 | 2.07E-31 | 19 |
| MAP3K13.2  | 9.69E-36 | 0.834124433  | 0.407 | 0.109 | 2.23E-31 | 19 |
| P4HA1.1    | 4.47E-35 | 0.51419396   | 0.374 | 0.094 | 1.03E-30 | 19 |
| C3.4       | 4.49E-35 | 0.701065482  | 0.467 | 0.137 | 1.03E-30 | 19 |
| BSDC1.1    | 5.16E-35 | 1.08496602   | 0.44  | 0.126 | 1.19E-30 | 19 |
| PIAS2.1    | 1.18E-34 | 0.790676554  | 0.33  | 0.077 | 2.70E-30 | 19 |
| DAB2.4     | 1.58E-34 | 0.89584216   | 0.505 | 0.157 | 3.63E-30 | 19 |
| UBR4.2     | 2.09E-34 | 0.557859367  | 0.379 | 0.099 | 4.80E-30 | 19 |
| RPLP1.6    | 4.62E-34 | -0.99161939  | 0.802 | 0.968 | 1.06E-29 | 19 |
| TM7SF3.1   | 5.87E-34 | 0.590777547  | 0.368 | 0.092 | 1.35E-29 | 19 |
| NFIA.3     | 5.92E-34 | 0.728726079  | 0.335 | 0.081 | 1.36E-29 | 19 |
| RUFY3.2    | 6.37E-34 | 0.871752106  | 0.264 | 0.054 | 1.46E-29 | 19 |
| RPL31.15   | 1.06E-33 | -1.161352332 | 0.626 | 0.911 | 2.43E-29 | 19 |
| RPL19.10   | 1.30E-33 | -0.990555101 | 0.698 | 0.928 | 2.99E-29 | 19 |



|                |          |              |       |       |          |    |
|----------------|----------|--------------|-------|-------|----------|----|
| ARHGEF12.2     | 1.34E-33 | 0.501318731  | 0.324 | 0.075 | 3.08E-29 | 19 |
| GSS            | 1.57E-33 | 0.522416433  | 0.291 | 0.063 | 3.60E-29 | 19 |
| IFI27.4        | 2.34E-33 | 0.704972435  | 0.478 | 0.15  | 5.37E-29 | 19 |
| POLR2J3.10     | 4.37E-33 | 1.65138409   | 0.764 | 0.39  | 1.01E-28 | 19 |
| LRRK2.3        | 5.02E-33 | 0.756387569  | 0.297 | 0.068 | 1.15E-28 | 19 |
| CMB9-22P13.1.1 | 5.29E-33 | 0.678060056  | 0.302 | 0.069 | 1.21E-28 | 19 |
| S100A4.16      | 5.75E-33 | -2.229043974 | 0.412 | 0.703 | 1.32E-28 | 19 |
| GMFG.10        | 6.36E-33 | -1.852227308 | 0.115 | 0.562 | 1.46E-28 | 19 |
| CD52.14        | 8.21E-33 | -2.80498812  | 0.121 | 0.554 | 1.89E-28 | 19 |
| AKAP8          | 8.55E-33 | 0.854450345  | 0.308 | 0.07  | 1.96E-28 | 19 |
| KDSR.2         | 9.77E-33 | 0.721717845  | 0.374 | 0.1   | 2.24E-28 | 19 |
| RPS19.10       | 2.13E-32 | -0.988185677 | 0.78  | 0.954 | 4.89E-28 | 19 |
| MT1F.2         | 3.84E-32 | 1.08832345   | 0.418 | 0.126 | 8.82E-28 | 19 |
| ATP11A.1       | 5.83E-32 | 1.045200891  | 0.258 | 0.055 | 1.34E-27 | 19 |
| SEC31A.2       | 5.96E-32 | 0.895965242  | 0.445 | 0.133 | 1.37E-27 | 19 |
| HCST.14        | 6.24E-32 | -2.224246748 | 0.115 | 0.55  | 1.43E-27 | 19 |
| RPS6.9         | 7.16E-32 | -1.007532841 | 0.692 | 0.947 | 1.65E-27 | 19 |
| SPP1.8         | 7.58E-32 | 0.668035274  | 0.555 | 0.212 | 1.74E-27 | 19 |
| RPL29.5        | 8.36E-32 | -1.136100201 | 0.56  | 0.859 | 1.92E-27 | 19 |
| CFL1.7         | 9.95E-32 | -1.556487963 | 0.495 | 0.75  | 2.29E-27 | 19 |
| RPS18.12       | 1.28E-31 | -0.997777051 | 0.736 | 0.962 | 2.93E-27 | 19 |
| TGFBI.5        | 1.44E-31 | 1.643019422  | 0.484 | 0.179 | 3.32E-27 | 19 |
| ACADM.1        | 1.76E-31 | 0.517416781  | 0.401 | 0.113 | 4.04E-27 | 19 |
| ATP5E.13       | 2.26E-31 | -1.208963224 | 0.5   | 0.82  | 5.20E-27 | 19 |
| WDR73          | 2.94E-31 | 0.549218976  | 0.291 | 0.066 | 6.75E-27 | 19 |
| ASL            | 3.04E-31 | 0.638476489  | 0.297 | 0.068 | 6.98E-27 | 19 |
| RPS23.8        | 3.32E-31 | -0.995308663 | 0.648 | 0.922 | 7.64E-27 | 19 |
| VMP1.12        | 3.41E-31 | 1.715017669  | 0.698 | 0.315 | 7.84E-27 | 19 |
| MMP24-AS1.3    | 3.79E-31 | 0.982689328  | 0.484 | 0.168 | 8.70E-27 | 19 |
| POLR2J2        | 5.54E-31 | 0.556737557  | 0.286 | 0.065 | 1.27E-26 | 19 |
| CLK4           | 5.56E-31 | 0.844850313  | 0.363 | 0.097 | 1.28E-26 | 19 |
| RPL35A.12      | 6.59E-31 | -1.020881048 | 0.698 | 0.92  | 1.51E-26 | 19 |
| RPS28.10       | 7.26E-31 | -0.937614304 | 0.731 | 0.95  | 1.67E-26 | 19 |
| RPL10A.11      | 8.62E-31 | -1.12638561  | 0.582 | 0.869 | 1.98E-26 | 19 |
| IFI44L.1       | 1.13E-30 | 1.287342468  | 0.297 | 0.072 | 2.60E-26 | 19 |
| ZNF37A         | 1.29E-30 | 0.735864657  | 0.297 | 0.069 | 2.96E-26 | 19 |
| PTTG1IP.3      | 1.32E-30 | 1.035559982  | 0.473 | 0.173 | 3.04E-26 | 19 |
| TMEM63A        | 1.37E-30 | 0.622749735  | 0.258 | 0.055 | 3.16E-26 | 19 |
| ZSCAN18.1      | 1.62E-30 | 1.04839125   | 0.28  | 0.064 | 3.72E-26 | 19 |
| RPS3A.8        | 1.64E-30 | -0.980469849 | 0.659 | 0.933 | 3.78E-26 | 19 |
| SLC50A1        | 1.68E-30 | 0.892995415  | 0.368 | 0.098 | 3.86E-26 | 19 |
| CD151.5        | 4.09E-30 | 1.149795912  | 0.495 | 0.197 | 9.40E-26 | 19 |
| CD69.17        | 4.17E-30 | -2.419867655 | 0.082 | 0.535 | 9.58E-26 | 19 |
| RPL13.10       | 5.50E-30 | -0.915362105 | 0.83  | 0.966 | 1.26E-25 | 19 |
| CPEB4.1        | 5.71E-30 | 0.988976095  | 0.346 | 0.092 | 1.31E-25 | 19 |
| CERS2.1        | 6.69E-30 | 0.52183787   | 0.368 | 0.102 | 1.54E-25 | 19 |
| RNPC3.1        | 7.50E-30 | 1.043641146  | 0.308 | 0.078 | 1.72E-25 | 19 |
| RPL11.8        | 7.51E-30 | -0.918932251 | 0.78  | 0.94  | 1.72E-25 | 19 |
| ALDH3A2.1      | 9.14E-30 | 0.56745261   | 0.269 | 0.059 | 2.10E-25 | 19 |
| MVP            | 1.43E-29 | 0.858015102  | 0.445 | 0.145 | 3.30E-25 | 19 |
| AKR1A1.3       | 2.34E-29 | 0.88996564   | 0.516 | 0.189 | 5.39E-25 | 19 |
| UFSP2.1        | 3.65E-29 | 0.631895999  | 0.324 | 0.082 | 8.39E-25 | 19 |
| ALOX5.3        | 5.28E-29 | 0.627187106  | 0.357 | 0.097 | 1.21E-24 | 19 |
| ESF1.1         | 5.79E-29 | 0.7385177    | 0.445 | 0.141 | 1.33E-24 | 19 |
| CBWD5          | 7.48E-29 | 1.088749736  | 0.341 | 0.092 | 1.72E-24 | 19 |
| METTL15.1      | 9.41E-29 | 1.909159058  | 0.363 | 0.105 | 2.16E-24 | 19 |
| RPL27.5        | 1.24E-28 | -1.087301424 | 0.538 | 0.856 | 2.85E-24 | 19 |
| ZNF33B.1       | 1.25E-28 | 0.546901112  | 0.264 | 0.06  | 2.88E-24 | 19 |

|             |          |              |       |       |          |    |
|-------------|----------|--------------|-------|-------|----------|----|
| RPL36AL.6   | 1.51E-28 | -1.559500308 | 0.456 | 0.715 | 3.47E-24 | 19 |
| AHCYL1.2    | 1.55E-28 | 0.761039215  | 0.324 | 0.083 | 3.56E-24 | 19 |
| MYO1C.2     | 2.38E-28 | 0.504282706  | 0.253 | 0.056 | 5.48E-24 | 19 |
| RPL18.10    | 2.60E-28 | -1.01575006  | 0.637 | 0.873 | 5.98E-24 | 19 |
| CORO1A.15   | 2.61E-28 | -1.862249737 | 0.187 | 0.57  | 6.01E-24 | 19 |
| YPEL2.2     | 2.62E-28 | 0.777700547  | 0.363 | 0.102 | 6.02E-24 | 19 |
| LGALS2.4    | 2.69E-28 | 0.727869967  | 0.346 | 0.097 | 6.19E-24 | 19 |
| MBNL2.2     | 3.49E-28 | 0.509840442  | 0.335 | 0.089 | 8.02E-24 | 19 |
| BNIP3L.4    | 3.75E-28 | 0.937500897  | 0.544 | 0.227 | 8.63E-24 | 19 |
| GOLGA8A.1   | 5.21E-28 | 1.030239259  | 0.308 | 0.08  | 1.20E-23 | 19 |
| LPP.2       | 6.05E-28 | 0.870501259  | 0.478 | 0.162 | 1.39E-23 | 19 |
| TFEC.2      | 6.29E-28 | 0.636439884  | 0.253 | 0.057 | 1.45E-23 | 19 |
| DUSP23.2    | 6.98E-28 | 1.016318713  | 0.456 | 0.17  | 1.60E-23 | 19 |
| ADIRF.12    | 8.46E-28 | 1.372473131  | 0.538 | 0.237 | 1.94E-23 | 19 |
| RGS1.18     | 8.90E-28 | -2.397425698 | 0.478 | 0.7   | 2.05E-23 | 19 |
| MDM2.1      | 1.07E-27 | 1.318807866  | 0.396 | 0.121 | 2.47E-23 | 19 |
| CYB5A.6     | 5.90E-27 | 1.007569542  | 0.522 | 0.225 | 1.36E-22 | 19 |
| EEF1A1.12   | 6.65E-27 | -0.819471416 | 0.841 | 0.97  | 1.53E-22 | 19 |
| SH3BGRL3.15 | 8.14E-27 | -1.690194549 | 0.445 | 0.685 | 1.87E-22 | 19 |
| NFIC.3      | 1.27E-26 | 0.62025966   | 0.385 | 0.116 | 2.91E-22 | 19 |
| SMYD4       | 1.53E-26 | 0.740796091  | 0.319 | 0.087 | 3.51E-22 | 19 |
| CYTIP.16    | 2.76E-26 | -1.654686225 | 0.071 | 0.481 | 6.34E-22 | 19 |
| ACADVL.2    | 2.92E-26 | 0.98083333   | 0.522 | 0.212 | 6.71E-22 | 19 |
| BACH1.2     | 3.40E-26 | 0.570780711  | 0.319 | 0.087 | 7.81E-22 | 19 |
| CD3D.19     | 4.79E-26 | -2.062635684 | 0.077 | 0.48  | 1.10E-21 | 19 |
| RPS2.10     | 6.36E-26 | -0.820332843 | 0.791 | 0.946 | 1.46E-21 | 19 |
| MAST4       | 6.64E-26 | 0.640392042  | 0.253 | 0.059 | 1.53E-21 | 19 |
| NDUFA4L2.18 | 9.79E-26 | 1.334225177  | 0.588 | 0.285 | 2.25E-21 | 19 |
| CD2.18      | 1.25E-25 | -2.204860935 | 0.066 | 0.462 | 2.88E-21 | 19 |
| RPL4.5      | 1.53E-25 | -1.192796719 | 0.505 | 0.773 | 3.52E-21 | 19 |
| PLIN2.13    | 1.66E-25 | 1.352219785  | 0.61  | 0.332 | 3.80E-21 | 19 |
| ARPC2.12    | 1.89E-25 | -1.699229641 | 0.401 | 0.641 | 4.35E-21 | 19 |
| H3F3B.12    | 2.76E-25 | -0.9063344   | 0.632 | 0.837 | 6.34E-21 | 19 |
| EEF1D.12    | 3.14E-25 | -1.195227206 | 0.505 | 0.774 | 7.22E-21 | 19 |
| CDKN1A.3    | 5.86E-25 | 1.015301902  | 0.374 | 0.117 | 1.35E-20 | 19 |
| PFN1.12     | 6.74E-25 | -1.242858686 | 0.527 | 0.763 | 1.55E-20 | 19 |
| TOR1AIP2    | 1.42E-24 | 0.750104112  | 0.363 | 0.11  | 3.27E-20 | 19 |
| MALAT1.17   | 1.74E-24 | 1.391951845  | 0.989 | 0.982 | 3.99E-20 | 19 |
| MAVS        | 1.80E-24 | 0.745549284  | 0.269 | 0.069 | 4.14E-20 | 19 |
| TMEM205.1   | 1.92E-24 | 0.737985016  | 0.418 | 0.15  | 4.41E-20 | 19 |
| PDK4.7      | 2.35E-24 | 1.587544381  | 0.505 | 0.199 | 5.40E-20 | 19 |
| RERE.2      | 3.75E-24 | 0.70328153   | 0.385 | 0.123 | 8.63E-20 | 19 |
| HMGB1.12    | 3.99E-24 | -1.317152403 | 0.555 | 0.737 | 9.18E-20 | 19 |
| ZNF397      | 5.17E-24 | 0.912956429  | 0.286 | 0.078 | 1.19E-19 | 19 |
| RPS10.8     | 6.56E-24 | -1.102576973 | 0.484 | 0.79  | 1.51E-19 | 19 |
| PDLIM5.2    | 6.94E-24 | 0.619627287  | 0.297 | 0.08  | 1.60E-19 | 19 |
| IGFBP3.13   | 7.71E-24 | 0.508117072  | 0.555 | 0.24  | 1.77E-19 | 19 |
| RPS13.10    | 8.00E-24 | -0.901706578 | 0.621 | 0.881 | 1.84E-19 | 19 |
| UQCRH.7     | 1.39E-23 | 1.870860971  | 0.753 | 0.46  | 3.19E-19 | 19 |
| RPS7.12     | 1.42E-23 | -0.868532925 | 0.643 | 0.888 | 3.25E-19 | 19 |
| RPS24.12    | 1.76E-23 | -0.884775984 | 0.648 | 0.917 | 4.05E-19 | 19 |
| DUSP2.17    | 1.98E-23 | -2.455086702 | 0.071 | 0.436 | 4.55E-19 | 19 |
| RPS9.8      | 2.24E-23 | -0.917712142 | 0.654 | 0.881 | 5.16E-19 | 19 |
| LINC00657.2 | 2.27E-23 | 0.743074757  | 0.434 | 0.157 | 5.22E-19 | 19 |
| UGCG        | 2.31E-23 | 0.629742879  | 0.291 | 0.08  | 5.30E-19 | 19 |
| CD53.12     | 2.74E-23 | -1.370252124 | 0.104 | 0.476 | 6.30E-19 | 19 |
| RPL3.10     | 2.90E-23 | -0.848799717 | 0.692 | 0.935 | 6.67E-19 | 19 |
| HPCAL1.4    | 2.97E-23 | 0.510059945  | 0.462 | 0.168 | 6.82E-19 | 19 |

|                 |          |              |       |       |          |    |
|-----------------|----------|--------------|-------|-------|----------|----|
| C6orf89         | 3.59E-23 | 0.55420523   | 0.313 | 0.09  | 8.26E-19 | 19 |
| AC159540.1      | 5.81E-23 | 0.620492145  | 0.286 | 0.08  | 1.33E-18 | 19 |
| CHD9.3          | 8.55E-23 | 0.931719385  | 0.511 | 0.2   | 1.97E-18 | 19 |
| TNFSF10.4       | 9.18E-23 | 0.874367601  | 0.434 | 0.164 | 2.11E-18 | 19 |
| RNF114.1        | 9.61E-23 | 0.985009398  | 0.44  | 0.159 | 2.21E-18 | 19 |
| RPL7.10         | 9.92E-23 | -0.89525491  | 0.692 | 0.923 | 2.28E-18 | 19 |
| LEPROT.4        | 1.10E-22 | 0.766544013  | 0.484 | 0.194 | 2.53E-18 | 19 |
| AFF1.1          | 1.21E-22 | 0.797987193  | 0.335 | 0.104 | 2.77E-18 | 19 |
| RRBP1.3         | 1.34E-22 | 0.737760142  | 0.412 | 0.151 | 3.08E-18 | 19 |
| FOXJ3.1         | 1.39E-22 | 0.619536129  | 0.258 | 0.067 | 3.20E-18 | 19 |
| ANKLE2          | 1.49E-22 | 1.03399895   | 0.346 | 0.112 | 3.42E-18 | 19 |
| TBL1XR1.1       | 1.68E-22 | 1.149197344  | 0.456 | 0.174 | 3.86E-18 | 19 |
| CD37.13         | 2.08E-22 | -1.605293477 | 0.115 | 0.468 | 4.79E-18 | 19 |
| HIPK2.2         | 2.21E-22 | 0.888991939  | 0.357 | 0.113 | 5.09E-18 | 19 |
| CD3E.18         | 3.53E-22 | -1.819016882 | 0.044 | 0.402 | 8.12E-18 | 19 |
| SERPINA1.18     | 4.32E-22 | 1.157427352  | 0.566 | 0.275 | 9.94E-18 | 19 |
| ACBD3           | 5.16E-22 | 0.625594657  | 0.269 | 0.072 | 1.19E-17 | 19 |
| CCL5.17         | 5.86E-22 | -2.583290031 | 0.269 | 0.566 | 1.35E-17 | 19 |
| HLA-A.14        | 7.72E-22 | -0.901315859 | 0.72  | 0.896 | 1.77E-17 | 19 |
| CYBA.12         | 8.70E-22 | -1.297915378 | 0.478 | 0.69  | 2.00E-17 | 19 |
| POLR2H.1        | 1.37E-21 | 0.614415512  | 0.324 | 0.099 | 3.15E-17 | 19 |
| RAB11FIP1       | 1.42E-21 | 0.529347775  | 0.379 | 0.125 | 3.26E-17 | 19 |
| ABLIM1.1        | 1.72E-21 | 0.53206422   | 0.258 | 0.068 | 3.95E-17 | 19 |
| RPL35.10        | 1.87E-21 | -0.897494632 | 0.626 | 0.901 | 4.30E-17 | 19 |
| PDE4D           | 1.96E-21 | 0.664803994  | 0.286 | 0.083 | 4.51E-17 | 19 |
| PRKAG2.3        | 2.64E-21 | 1.120805839  | 0.412 | 0.148 | 6.07E-17 | 19 |
| HSPB1.16        | 2.69E-21 | 1.115823182  | 0.67  | 0.431 | 6.18E-17 | 19 |
| RPL6.10         | 2.85E-21 | -0.909385888 | 0.593 | 0.886 | 6.55E-17 | 19 |
| TRAC.19         | 3.07E-21 | -1.99190101  | 0.088 | 0.437 | 7.06E-17 | 19 |
| FYB.16          | 3.41E-21 | -1.431407764 | 0.115 | 0.464 | 7.84E-17 | 19 |
| FAM63B          | 3.61E-21 | 0.599076223  | 0.335 | 0.106 | 8.29E-17 | 19 |
| ZBTB16.5        | 3.89E-21 | 1.154407504  | 0.511 | 0.217 | 8.94E-17 | 19 |
| GOLGA2.2        | 4.02E-21 | 0.666277421  | 0.297 | 0.086 | 9.24E-17 | 19 |
| RPL41.14        | 4.25E-21 | -0.753406608 | 0.824 | 0.978 | 9.76E-17 | 19 |
| CD44.13         | 4.57E-21 | -1.701873708 | 0.181 | 0.495 | 1.05E-16 | 19 |
| HNRNPA1.8       | 4.94E-21 | -1.050769951 | 0.544 | 0.78  | 1.14E-16 | 19 |
| GOLGB1.4        | 5.02E-21 | 0.984635399  | 0.527 | 0.218 | 1.15E-16 | 19 |
| TTPAL           | 9.11E-21 | 0.883400506  | 0.269 | 0.079 | 2.09E-16 | 19 |
| DDAH2.3         | 1.47E-20 | 0.619343009  | 0.363 | 0.125 | 3.37E-16 | 19 |
| SERF2.7         | 2.25E-20 | -0.983698041 | 0.538 | 0.821 | 5.18E-16 | 19 |
| MYL12A.9        | 2.31E-20 | -1.21687008  | 0.473 | 0.693 | 5.31E-16 | 19 |
| ANKRD36.3       | 2.80E-20 | 0.688955492  | 0.374 | 0.129 | 6.44E-16 | 19 |
| CD48.16         | 2.95E-20 | -1.269549507 | 0.038 | 0.379 | 6.78E-16 | 19 |
| CST7.16         | 3.23E-20 | -2.220172516 | 0.066 | 0.393 | 7.42E-16 | 19 |
| SFXN1.1         | 4.39E-20 | 0.679701961  | 0.324 | 0.103 | 1.01E-15 | 19 |
| HLA-E.16        | 4.85E-20 | -0.706873343 | 0.637 | 0.792 | 1.12E-15 | 19 |
| TNFAIP3.17      | 5.16E-20 | -1.689892935 | 0.121 | 0.451 | 1.19E-15 | 19 |
| SEPT11.2        | 7.55E-20 | 0.745187576  | 0.363 | 0.123 | 1.73E-15 | 19 |
| GDI1            | 1.31E-19 | 0.628850274  | 0.28  | 0.086 | 3.00E-15 | 19 |
| RPS17.9         | 2.53E-19 | -0.792369794 | 0.665 | 0.901 | 5.82E-15 | 19 |
| PKM.11          | 2.94E-19 | 1.094906913  | 0.626 | 0.431 | 6.77E-15 | 19 |
| MLEC.1          | 2.99E-19 | 0.503777284  | 0.423 | 0.164 | 6.88E-15 | 19 |
| HMGN3.6         | 3.02E-19 | 1.013194626  | 0.588 | 0.302 | 6.94E-15 | 19 |
| POLR2C          | 3.02E-19 | 0.548602912  | 0.396 | 0.141 | 6.94E-15 | 19 |
| CCNL2           | 3.12E-19 | 0.833940657  | 0.297 | 0.098 | 7.17E-15 | 19 |
| PDXDC1          | 3.37E-19 | 0.691902347  | 0.302 | 0.096 | 7.75E-15 | 19 |
| RP11-347P5.1.18 | 4.25E-19 | -1.705976575 | 0.055 | 0.38  | 9.77E-15 | 19 |
| PPP2R5C.15      | 4.58E-19 | -1.69178872  | 0.082 | 0.394 | 1.05E-14 | 19 |

|             |          |              |       |       |          |    |
|-------------|----------|--------------|-------|-------|----------|----|
| RPL23.10    | 4.70E-19 | -0.918070967 | 0.56  | 0.821 | 1.08E-14 | 19 |
| CCL4.19     | 7.19E-19 | -3.035587368 | 0.148 | 0.444 | 1.65E-14 | 19 |
| KIAA0907    | 1.13E-18 | 0.916024869  | 0.302 | 0.099 | 2.60E-14 | 19 |
| SREK1.3     | 1.32E-18 | 0.810976164  | 0.445 | 0.179 | 3.03E-14 | 19 |
| SLC25A36    | 1.69E-18 | 0.791500344  | 0.335 | 0.117 | 3.88E-14 | 19 |
| SELM.5      | 1.77E-18 | 0.646762966  | 0.418 | 0.181 | 4.07E-14 | 19 |
| CFDP1.3     | 1.86E-18 | 0.850235919  | 0.462 | 0.188 | 4.29E-14 | 19 |
| GZMA.18     | 1.91E-18 | -2.244530084 | 0.126 | 0.423 | 4.39E-14 | 19 |
| SAT2        | 2.52E-18 | 0.781856133  | 0.423 | 0.165 | 5.79E-14 | 19 |
| LMF2        | 2.64E-18 | 0.583154588  | 0.269 | 0.081 | 6.07E-14 | 19 |
| ELF1.14     | 3.63E-18 | -1.550755766 | 0.165 | 0.444 | 8.34E-14 | 19 |
| GLS         | 3.90E-18 | 0.62810498   | 0.357 | 0.129 | 8.95E-14 | 19 |
| HLA-DRB5.15 | 5.19E-18 | -2.060752453 | 0.066 | 0.377 | 1.19E-13 | 19 |
| CELF2.14    | 5.81E-18 | -1.171507138 | 0.115 | 0.43  | 1.34E-13 | 19 |
| CFAP97.1    | 5.83E-18 | 0.608044167  | 0.385 | 0.144 | 1.34E-13 | 19 |
| SOX4.2      | 6.90E-18 | 1.248325723  | 0.302 | 0.1   | 1.58E-13 | 19 |
| RPS11.11    | 7.29E-18 | -0.829040401 | 0.571 | 0.859 | 1.68E-13 | 19 |
| CBR4.1      | 7.53E-18 | 0.647213788  | 0.258 | 0.08  | 1.73E-13 | 19 |
| KLHDC2.2    | 7.65E-18 | 0.502639465  | 0.412 | 0.158 | 1.76E-13 | 19 |
| GPSM3.13    | 9.77E-18 | -1.341260759 | 0.099 | 0.394 | 2.25E-13 | 19 |
| PFDN5.9     | 1.04E-17 | -0.913508689 | 0.544 | 0.787 | 2.39E-13 | 19 |
| RORA.4      | 1.04E-17 | 0.940654909  | 0.505 | 0.214 | 2.39E-13 | 19 |
| IL2RG.19    | 1.17E-17 | -1.477995849 | 0.071 | 0.376 | 2.70E-13 | 19 |
| STK17B.14   | 1.25E-17 | -1.475596841 | 0.104 | 0.404 | 2.87E-13 | 19 |
| LCP1.16     | 1.55E-17 | -1.142325252 | 0.093 | 0.408 | 3.57E-13 | 19 |
| JUNB.15     | 1.61E-17 | -1.266767518 | 0.522 | 0.726 | 3.69E-13 | 19 |
| MKLN1.1     | 1.73E-17 | 0.679410851  | 0.28  | 0.091 | 3.98E-13 | 19 |
| COX4I1.2    | 2.00E-17 | -1.084990938 | 0.478 | 0.699 | 4.59E-13 | 19 |
| PSME1.7     | 2.97E-17 | -1.242605993 | 0.374 | 0.584 | 6.84E-13 | 19 |
| METTL7A.3   | 2.98E-17 | 0.620420306  | 0.319 | 0.111 | 6.85E-13 | 19 |
| RPL38.11    | 3.45E-17 | -0.827896089 | 0.533 | 0.872 | 7.94E-13 | 19 |
| SLA.15      | 4.17E-17 | -1.161648778 | 0.099 | 0.403 | 9.59E-13 | 19 |
| EVL.17      | 4.61E-17 | -1.202927487 | 0.225 | 0.499 | 1.06E-12 | 19 |
| GTF2I.3     | 4.68E-17 | 0.821064963  | 0.462 | 0.203 | 1.07E-12 | 19 |
| WDR11       | 5.95E-17 | 0.913871014  | 0.291 | 0.1   | 1.37E-12 | 19 |
| GATAD1.1    | 6.27E-17 | 0.593104026  | 0.275 | 0.09  | 1.44E-12 | 19 |
| TRIM56.3    | 6.30E-17 | 0.782518148  | 0.445 | 0.187 | 1.45E-12 | 19 |
| YBX1.10     | 8.20E-17 | -1.198449992 | 0.467 | 0.673 | 1.88E-12 | 19 |
| RPL5.8      | 8.51E-17 | -0.836328353 | 0.571 | 0.856 | 1.96E-12 | 19 |
| GZMK.19     | 1.13E-16 | -2.789584033 | 0.088 | 0.369 | 2.60E-12 | 19 |
| RNMT.1      | 1.17E-16 | 1.004154167  | 0.511 | 0.239 | 2.68E-12 | 19 |
| CBWD1       | 1.30E-16 | 0.523034901  | 0.313 | 0.108 | 2.99E-12 | 19 |
| RAC2.17     | 1.96E-16 | -1.1530651   | 0.082 | 0.376 | 4.50E-12 | 19 |
| BTF3.5      | 2.69E-16 | -0.960535389 | 0.489 | 0.729 | 6.18E-12 | 19 |
| TIPARP.3    | 2.98E-16 | 0.945717606  | 0.335 | 0.13  | 6.85E-12 | 19 |
| RPL9.9      | 3.84E-16 | -0.718898356 | 0.659 | 0.905 | 8.82E-12 | 19 |
| USP8.1      | 3.91E-16 | 0.961137951  | 0.412 | 0.171 | 8.99E-12 | 19 |
| SUMO2.7     | 4.75E-16 | -1.161400661 | 0.407 | 0.61  | 1.09E-11 | 19 |
| STK4.14     | 5.46E-16 | -1.437216357 | 0.22  | 0.475 | 1.25E-11 | 19 |
| CALM1.10    | 7.03E-16 | -1.290019732 | 0.401 | 0.598 | 1.61E-11 | 19 |
| LTB.16      | 7.24E-16 | -1.70934333  | 0.027 | 0.305 | 1.66E-11 | 19 |
| LMAN1.2     | 9.12E-16 | 0.580157475  | 0.429 | 0.188 | 2.10E-11 | 19 |
| LAPTM5.14   | 1.04E-15 | -1.223301083 | 0.368 | 0.57  | 2.38E-11 | 19 |
| CARHSP1.5   | 1.33E-15 | 0.611788418  | 0.456 | 0.203 | 3.05E-11 | 19 |
| H3F3A.10    | 1.55E-15 | -1.018023421 | 0.516 | 0.742 | 3.56E-11 | 19 |
| GIMAP4.13   | 1.61E-15 | -1.370356797 | 0.071 | 0.342 | 3.71E-11 | 19 |
| OAZ1.13     | 1.71E-15 | -0.871149975 | 0.533 | 0.738 | 3.94E-11 | 19 |
| EVI2B.11    | 1.74E-15 | -1.100754164 | 0.055 | 0.339 | 4.00E-11 | 19 |

|             |       |          |              |       |       |          |    |
|-------------|-------|----------|--------------|-------|-------|----------|----|
| UQCRB.7     |       | 1.79E-15 | -0.919703962 | 0.505 | 0.747 | 4.12E-11 | 19 |
| TRBC2.18    |       | 2.36E-15 | -1.725000015 | 0.11  | 0.38  | 5.43E-11 | 19 |
| DDB2.3      |       | 3.21E-15 | 0.749344827  | 0.352 | 0.139 | 7.38E-11 | 19 |
| TUBGCP2.1   |       | 3.35E-15 | 0.661504306  | 0.319 | 0.12  | 7.69E-11 | 19 |
| PABPC1.9    |       | 3.64E-15 | -0.870946687 | 0.516 | 0.664 | 8.36E-11 | 19 |
| CD3G.18     |       | 5.21E-15 | -1.276790536 | 0.027 | 0.297 | 1.20E-10 | 19 |
| EEF1B2.6    |       | 6.00E-15 | -0.965356988 | 0.473 | 0.664 | 1.38E-10 | 19 |
| PARP14.3    |       | 6.50E-15 | 0.758554258  | 0.44  | 0.202 | 1.49E-10 | 19 |
| CDK5RAP3.1  |       | 6.52E-15 | 0.654789149  | 0.379 | 0.154 | 1.50E-10 | 19 |
| LSP1.18     |       | 6.82E-15 | -1.341160451 | 0.187 | 0.438 | 1.57E-10 | 19 |
| GOLGA8B.2   |       | 9.46E-15 | 0.703088221  | 0.269 | 0.094 | 2.17E-10 | 19 |
| RPL24.12    |       | 1.11E-14 | -0.780083177 | 0.566 | 0.856 | 2.54E-10 | 19 |
| IARS        |       | 1.24E-14 | 0.597048807  | 0.264 | 0.091 | 2.84E-10 | 19 |
| GIMAP7.16   |       | 1.34E-14 | -1.421732993 | 0.033 | 0.288 | 3.07E-10 | 19 |
| GOSR1       |       | 1.38E-14 | 0.660883825  | 0.28  | 0.098 | 3.17E-10 | 19 |
| PSMD5-AS1.2 |       | 1.62E-14 | 0.749598265  | 0.275 | 0.099 | 3.73E-10 | 19 |
| TRBC1.18    |       | 1.67E-14 | -1.944271657 | 0.093 | 0.357 | 3.83E-10 | 19 |
| PIK3IP1.17  |       | 2.22E-14 | -1.348353044 | 0.099 | 0.361 | 5.11E-10 | 19 |
| SAMSN1.11   |       | 2.35E-14 | -1.25089875  | 0.06  | 0.326 | 5.40E-10 | 19 |
| SPAG9.2     |       | 3.29E-14 | 0.781182723  | 0.346 | 0.143 | 7.57E-10 | 19 |
| ITM2A.18    |       | 3.48E-14 | -1.64999457  | 0.06  | 0.314 | 7.99E-10 | 19 |
| RPL37.11    |       | 3.71E-14 | -0.629799058 | 0.654 | 0.912 | 8.53E-10 | 19 |
| LCK.19      |       | 4.36E-14 | -1.101523565 | 0.033 | 0.291 | 1.00E-09 | 19 |
| STK17A.16   |       | 5.27E-14 | -1.275362871 | 0.121 | 0.37  | 1.21E-09 | 19 |
| RPS5.9      |       | 5.87E-14 | -0.818653523 | 0.544 | 0.845 | 1.35E-09 | 19 |
| NKG7.19     |       | 6.30E-14 | -2.4209643   | 0.198 | 0.43  | 1.45E-09 | 19 |
| NBEAL1.6    |       | 6.76E-14 | -1.0279776   | 0.44  | 0.617 | 1.55E-09 | 19 |
| RGCC.16     |       | 7.02E-14 | -1.860281303 | 0.055 | 0.31  | 1.61E-09 | 19 |
| PRDM1.12    |       | 7.73E-14 | -1.3843873   | 0.044 | 0.295 | 1.78E-09 | 19 |
| CTSA.4      |       | 9.00E-14 | 0.531418923  | 0.412 | 0.195 | 2.07E-09 | 19 |
| MT-CO2.11   |       | 1.03E-13 | -0.618181229 | 0.78  | 0.876 | 2.37E-09 | 19 |
|             | 6-Mar | 1.11E-13 | 0.832190028  | 0.341 | 0.139 | 2.55E-09 | 19 |
| CD7.15      |       | 1.13E-13 | -1.409745263 | 0.049 | 0.303 | 2.60E-09 | 19 |
| MGST3.14    |       | 1.19E-13 | 0.629933483  | 0.5   | 0.304 | 2.74E-09 | 19 |
| RPS8.11     |       | 1.51E-13 | -0.695671125 | 0.714 | 0.92  | 3.48E-09 | 19 |
| LDHA.14     |       | 1.54E-13 | 1.085534044  | 0.665 | 0.578 | 3.53E-09 | 19 |
| OST4.6      |       | 1.59E-13 | -0.904153799 | 0.434 | 0.663 | 3.66E-09 | 19 |
| EVI2A.13    |       | 1.72E-13 | -1.119977176 | 0.038 | 0.283 | 3.96E-09 | 19 |
| CHD2.2      |       | 1.80E-13 | 0.790946313  | 0.407 | 0.18  | 4.13E-09 | 19 |
| CTSD.10     |       | 2.42E-13 | 0.96364103   | 0.577 | 0.435 | 5.57E-09 | 19 |
| LONP2       |       | 2.47E-13 | 0.871111826  | 0.313 | 0.127 | 5.69E-09 | 19 |
| DDX17.10    |       | 2.66E-13 | 0.899311513  | 0.665 | 0.395 | 6.10E-09 | 19 |
| ARPC1B.11   |       | 2.97E-13 | -1.269933584 | 0.379 | 0.527 | 6.84E-09 | 19 |
| CTSS.14     |       | 3.20E-13 | -1.64362061  | 0.132 | 0.366 | 7.35E-09 | 19 |
| ANKRD36B    |       | 3.24E-13 | 0.653204628  | 0.253 | 0.092 | 7.46E-09 | 19 |
| LIMD2.17    |       | 3.25E-13 | -1.17887087  | 0.071 | 0.314 | 7.46E-09 | 19 |
| ZNF451      |       | 3.55E-13 | 0.519757149  | 0.286 | 0.108 | 8.16E-09 | 19 |
| ARPC3.10    |       | 4.36E-13 | -0.961636107 | 0.445 | 0.607 | 1.00E-08 | 19 |
| TTC3        |       | 4.45E-13 | 0.581588641  | 0.473 | 0.232 | 1.02E-08 | 19 |
| NDUFC1.13   |       | 4.96E-13 | 0.77733278   | 0.451 | 0.268 | 1.14E-08 | 19 |
| TOMM7.10    |       | 5.33E-13 | -0.787056804 | 0.484 | 0.758 | 1.22E-08 | 19 |
| SNHG9.1     |       | 7.44E-13 | 1.357075386  | 0.319 | 0.132 | 1.71E-08 | 19 |
| HSP90AA1.12 |       | 7.88E-13 | -1.089070433 | 0.505 | 0.656 | 1.81E-08 | 19 |
| RCSD1.11    |       | 1.04E-12 | -0.936079424 | 0.022 | 0.252 | 2.38E-08 | 19 |
| SUB1.7      |       | 1.14E-12 | -1.151998873 | 0.429 | 0.576 | 2.61E-08 | 19 |
| AHNAK.7     |       | 1.55E-12 | 0.736635476  | 0.516 | 0.291 | 3.55E-08 | 19 |
| VEZT        |       | 1.63E-12 | 0.609215783  | 0.264 | 0.098 | 3.74E-08 | 19 |
| TPI1.13     |       | 2.23E-12 | 0.904670991  | 0.659 | 0.563 | 5.13E-08 | 19 |

|             |          |              |       |       |          |    |
|-------------|----------|--------------|-------|-------|----------|----|
| WSB1.8      | 2.62E-12 | 1.193686673  | 0.593 | 0.357 | 6.02E-08 | 19 |
| EMB.15      | 2.63E-12 | -0.796833102 | 0.038 | 0.272 | 6.05E-08 | 19 |
| CLEC2B.11   | 2.89E-12 | -1.335193971 | 0.17  | 0.381 | 6.65E-08 | 19 |
| BIN2.13     | 3.12E-12 | -1.055862471 | 0.027 | 0.252 | 7.18E-08 | 19 |
| SH3KBP1.14  | 3.41E-12 | -1.057402068 | 0.082 | 0.311 | 7.83E-08 | 19 |
| CD27.17     | 3.97E-12 | -1.619949293 | 0.049 | 0.27  | 9.12E-08 | 19 |
| SRP14.7     | 4.56E-12 | -0.87811202  | 0.456 | 0.719 | 1.05E-07 | 19 |
| RPS20.9     | 4.76E-12 | -0.603553885 | 0.648 | 0.9   | 1.09E-07 | 19 |
| SARAF.11    | 4.85E-12 | -0.714732926 | 0.516 | 0.68  | 1.11E-07 | 19 |
| DARS.3      | 4.95E-12 | 0.649003365  | 0.423 | 0.205 | 1.14E-07 | 19 |
| GNG11.3     | 5.75E-12 | -0.504548542 | 0.352 | 0.141 | 1.32E-07 | 19 |
| SLC35E3.3   | 5.87E-12 | 0.810196612  | 0.275 | 0.111 | 1.35E-07 | 19 |
| BORCS7.1    | 6.23E-12 | 0.541726244  | 0.308 | 0.125 | 1.43E-07 | 19 |
| FNBP1.17    | 6.55E-12 | -1.081645878 | 0.148 | 0.37  | 1.51E-07 | 19 |
| COMMD6.8    | 6.66E-12 | -0.987344562 | 0.423 | 0.608 | 1.53E-07 | 19 |
| IER3.3      | 7.02E-12 | 0.577018097  | 0.269 | 0.107 | 1.61E-07 | 19 |
| FYN.12      | 7.50E-12 | -1.054622592 | 0.049 | 0.269 | 1.72E-07 | 19 |
| PNRC1.11    | 7.89E-12 | -0.908013582 | 0.5   | 0.636 | 1.81E-07 | 19 |
| MYO1F.13    | 8.23E-12 | -0.966503847 | 0.049 | 0.274 | 1.89E-07 | 19 |
| PHPT1.10    | 8.97E-12 | 0.61775413   | 0.467 | 0.273 | 2.06E-07 | 19 |
| MYL12B.5    | 9.20E-12 | -0.958465644 | 0.451 | 0.637 | 2.11E-07 | 19 |
| PRKCH.14    | 1.13E-11 | -0.772113809 | 0.033 | 0.256 | 2.59E-07 | 19 |
| ZKSCAN1.2   | 1.43E-11 | 0.914777867  | 0.302 | 0.127 | 3.29E-07 | 19 |
| PRDX2.11    | 1.45E-11 | 0.532706594  | 0.445 | 0.262 | 3.33E-07 | 19 |
| NME3.1      | 1.45E-11 | 0.534418496  | 0.39  | 0.185 | 3.33E-07 | 19 |
| WIPF1.17    | 1.84E-11 | -1.105166687 | 0.132 | 0.346 | 4.22E-07 | 19 |
| RPL36A.12   | 1.97E-11 | -0.628625455 | 0.56  | 0.804 | 4.54E-07 | 19 |
| FXYD5.11    | 2.02E-11 | -0.932327589 | 0.313 | 0.483 | 4.63E-07 | 19 |
| IL7R.16     | 2.28E-11 | -1.982626916 | 0.088 | 0.306 | 5.25E-07 | 19 |
| NR4A2.15    | 2.42E-11 | -1.16507378  | 0.06  | 0.279 | 5.57E-07 | 19 |
| FNIP1.1     | 2.49E-11 | 0.515277294  | 0.33  | 0.143 | 5.71E-07 | 19 |
| SRGAP1.3    | 2.55E-11 | 0.996945939  | 0.264 | 0.108 | 5.86E-07 | 19 |
| RPL36.15    | 2.59E-11 | -0.65642097  | 0.687 | 0.915 | 5.95E-07 | 19 |
| EXOC7       | 2.74E-11 | 0.838503942  | 0.313 | 0.136 | 6.30E-07 | 19 |
| LUC7L3.11   | 2.82E-11 | 0.936533408  | 0.555 | 0.308 | 6.47E-07 | 19 |
| ISG20.13    | 3.13E-11 | -1.141646145 | 0.154 | 0.364 | 7.19E-07 | 19 |
| ATP5L.8     | 3.33E-11 | -0.819510296 | 0.505 | 0.677 | 7.66E-07 | 19 |
| RPS27L.12   | 3.96E-11 | 0.551541482  | 0.615 | 0.471 | 9.10E-07 | 19 |
| COTL1.13    | 4.51E-11 | -1.418473668 | 0.264 | 0.436 | 1.04E-06 | 19 |
| ITGB2.16    | 4.59E-11 | -1.242968135 | 0.236 | 0.417 | 1.06E-06 | 19 |
| CANX.11     | 5.55E-11 | 0.656753731  | 0.467 | 0.297 | 1.28E-06 | 19 |
| EZR.7       | 5.61E-11 | 0.742695953  | 0.495 | 0.322 | 1.29E-06 | 19 |
| GLIPR1.13   | 6.01E-11 | -1.00488842  | 0.088 | 0.302 | 1.38E-06 | 19 |
| LAPTM4A.13  | 6.25E-11 | 0.762000016  | 0.5   | 0.35  | 1.44E-06 | 19 |
| SQSTM1.5    | 7.98E-11 | 0.617914072  | 0.522 | 0.311 | 1.83E-06 | 19 |
| LGALS1.10   | 8.45E-11 | -1.165894566 | 0.429 | 0.574 | 1.94E-06 | 19 |
| CCDC14.1    | 9.21E-11 | 0.517357959  | 0.258 | 0.103 | 2.12E-06 | 19 |
| TRAF3IP3.17 | 9.25E-11 | -1.0432731   | 0.055 | 0.258 | 2.13E-06 | 19 |
| PEBP1.14    | 1.17E-10 | 0.564490138  | 0.544 | 0.388 | 2.69E-06 | 19 |
| SLC38A2.4   | 1.19E-10 | 0.670981781  | 0.423 | 0.205 | 2.75E-06 | 19 |
| NACA.9      | 1.32E-10 | -0.655183143 | 0.56  | 0.807 | 3.03E-06 | 19 |
| AKNA.12     | 1.35E-10 | -0.911840483 | 0.06  | 0.264 | 3.11E-06 | 19 |
| KIAA1551.14 | 1.53E-10 | -1.252246909 | 0.143 | 0.338 | 3.51E-06 | 19 |
| IFI16.8     | 1.58E-10 | -1.206392513 | 0.335 | 0.483 | 3.64E-06 | 19 |
| HERC4       | 1.66E-10 | 0.556457282  | 0.269 | 0.112 | 3.82E-06 | 19 |
| FUNDCC2.4   | 1.81E-10 | 0.505073719  | 0.374 | 0.187 | 4.15E-06 | 19 |
| AFF4.2      | 1.81E-10 | 0.7026644    | 0.352 | 0.164 | 4.15E-06 | 19 |
| TXNIP.14    | 1.94E-10 | -0.867291222 | 0.703 | 0.764 | 4.46E-06 | 19 |

|              |          |              |       |       |             |    |
|--------------|----------|--------------|-------|-------|-------------|----|
| OCIAD2.14    | 1.98E-10 | 0.521830414  | 0.451 | 0.258 | 4.56E-06    | 19 |
| HM13.1       | 2.14E-10 | 0.502321389  | 0.385 | 0.188 | 4.91E-06    | 19 |
| CD96.18      | 3.58E-10 | -0.850350337 | 0.049 | 0.251 | 8.23E-06    | 19 |
| ID2.13       | 4.18E-10 | -1.258916296 | 0.434 | 0.566 | 9.60E-06    | 19 |
| PHF14.2      | 4.25E-10 | 0.594426055  | 0.39  | 0.189 | 9.77E-06    | 19 |
| EIF3E.7      | 4.53E-10 | -0.970726585 | 0.407 | 0.547 | 1.04E-05    | 19 |
| ETS1.16      | 4.56E-10 | -1.0224729   | 0.137 | 0.341 | 1.05E-05    | 19 |
| SLC25A6.9    | 4.67E-10 | -0.737964319 | 0.511 | 0.657 | 1.07E-05    | 19 |
| SPG7.1       | 4.71E-10 | 0.545473987  | 0.297 | 0.128 | 1.08E-05    | 19 |
| UBB.10       | 4.93E-10 | -0.792644333 | 0.478 | 0.723 | 1.13E-05    | 19 |
| RPL8.7       | 7.63E-10 | -0.540413661 | 0.67  | 0.885 | 1.75E-05    | 19 |
| IL10RA.14    | 9.17E-10 | -1.050456359 | 0.077 | 0.261 | 2.11E-05    | 19 |
| ALDOA.8      | 1.01E-09 | 0.866830543  | 0.654 | 0.637 | 2.32E-05    | 19 |
| SEPT6.15     | 1.01E-09 | -0.91723756  | 0.082 | 0.28  | 2.32E-05    | 19 |
| RPL22.9      | 1.06E-09 | -0.54375709  | 0.544 | 0.814 | 2.43E-05    | 19 |
| ANKRD44.11   | 1.29E-09 | -0.75816633  | 0.071 | 0.261 | 2.97E-05    | 19 |
| ARF6.11      | 1.36E-09 | -1.13999304  | 0.209 | 0.382 | 3.13E-05    | 19 |
| FOS.17       | 1.50E-09 | -0.543807496 | 0.538 | 0.683 | 3.44E-05    | 19 |
| ACTG1.11     | 1.55E-09 | -0.648700059 | 0.566 | 0.748 | 3.55E-05    | 19 |
| ATF6B        | 1.75E-09 | 0.66139488   | 0.418 | 0.214 | 4.01E-05    | 19 |
| SMAP2.13     | 1.87E-09 | -1.070155625 | 0.121 | 0.3   | 4.30E-05    | 19 |
| ACAP1.18     | 1.97E-09 | -0.77972221  | 0.132 | 0.336 | 4.54E-05    | 19 |
| GABPB1-AS1.3 | 1.98E-09 | 0.695703907  | 0.423 | 0.226 | 4.54E-05    | 19 |
| CSNK1A1.5    | 2.21E-09 | 0.658255925  | 0.511 | 0.301 | 5.08E-05    | 19 |
| ANKRD36C.3   | 2.83E-09 | 0.658067311  | 0.352 | 0.175 | 6.50E-05    | 19 |
| TNRC6A       | 3.10E-09 | 0.625759394  | 0.269 | 0.115 | 7.12E-05    | 19 |
| SYNE1.4      | 3.33E-09 | 0.556357737  | 0.341 | 0.163 | 7.66E-05    | 19 |
| DOCK8.14     | 3.63E-09 | -0.68984806  | 0.104 | 0.294 | 8.34E-05    | 19 |
| DDX24.13     | 3.67E-09 | -0.796138243 | 0.291 | 0.459 | 8.42E-05    | 19 |
| SRSF1        | 4.13E-09 | 0.59504495   | 0.341 | 0.164 | 9.48E-05    | 19 |
| C14orf2.6    | 5.42E-09 | -0.965293267 | 0.39  | 0.517 | 0.000124611 | 19 |
| COX7A2.6     | 6.00E-09 | -0.873441317 | 0.423 | 0.563 | 0.000137915 | 19 |
| SEPT7.11     | 6.54E-09 | -0.955669689 | 0.396 | 0.514 | 0.000150283 | 19 |
| CAPZB.9      | 6.84E-09 | -1.050270498 | 0.341 | 0.462 | 0.000157121 | 19 |
| FOXP1.10     | 6.96E-09 | -1.027826534 | 0.082 | 0.26  | 0.000159841 | 19 |
| FAM49B.12    | 7.29E-09 | -1.023208593 | 0.17  | 0.342 | 0.000167421 | 19 |
| INSR.7       | 8.56E-09 | -0.501333582 | 0.302 | 0.135 | 0.000196703 | 19 |
| EIF3K.4      | 9.68E-09 | -0.882842779 | 0.423 | 0.551 | 0.000222548 | 19 |
| GNLY.15      | 9.77E-09 | -2.482256058 | 0.071 | 0.255 | 0.000224521 | 19 |
| UBL5.7       | 1.12E-08 | -0.873457797 | 0.401 | 0.564 | 0.000258255 | 19 |
| VIMP.4       | 1.20E-08 | 0.52678664   | 0.429 | 0.226 | 0.000275077 | 19 |
| MT-ND3.12    | 1.29E-08 | -0.500317837 | 0.692 | 0.832 | 0.000296305 | 19 |
| RTN4.14      | 1.31E-08 | 0.50933534   | 0.516 | 0.348 | 0.000300189 | 19 |
| BRK1.7       | 1.35E-08 | -1.112601245 | 0.33  | 0.44  | 0.000309172 | 19 |
| CARD16.11    | 1.43E-08 | -0.976936152 | 0.148 | 0.319 | 0.000327505 | 19 |
| SYTL3.16     | 1.43E-08 | -1.196883215 | 0.11  | 0.279 | 0.000328979 | 19 |
| ATP1A1.8     | 1.83E-08 | 0.566875597  | 0.456 | 0.26  | 0.000419458 | 19 |
| CRIP1.15     | 1.83E-08 | -1.140626434 | 0.115 | 0.296 | 0.000420242 | 19 |
| CKLF.12      | 1.92E-08 | -1.09753642  | 0.214 | 0.365 | 0.000440625 | 19 |
| HLA-DPB1.15  | 2.00E-08 | -1.796911067 | 0.604 | 0.633 | 0.000458882 | 19 |
| MYL6.10      | 2.34E-08 | -0.569613578 | 0.599 | 0.799 | 0.000538466 | 19 |
| P4HB.8       | 2.34E-08 | 0.677498606  | 0.478 | 0.343 | 0.000538495 | 19 |
| GTF3A.6      | 2.35E-08 | -1.082570081 | 0.242 | 0.382 | 0.000539933 | 19 |
| UQCR11.5     | 2.36E-08 | -0.829710772 | 0.44  | 0.612 | 0.00054155  | 19 |
| AKAP9.9      | 2.58E-08 | 0.631421352  | 0.56  | 0.339 | 0.000592167 | 19 |
| TTC19.2      | 2.63E-08 | 0.781368276  | 0.379 | 0.195 | 0.000604146 | 19 |
| JUND.9       | 2.76E-08 | -0.698617209 | 0.137 | 0.312 | 0.000634321 | 19 |
| EMP3.9       | 2.83E-08 | -1.036526148 | 0.236 | 0.392 | 0.000649764 | 19 |

|              |           |              |       |       |             |    |
|--------------|-----------|--------------|-------|-------|-------------|----|
| DDIT4.12     | 2.90E-08  | 0.564015741  | 0.67  | 0.516 | 0.000666803 | 19 |
| RGS2.16      | 3.21E-08  | -1.236090063 | 0.17  | 0.337 | 0.000738413 | 19 |
| RHOA.14      | 4.15E-08  | -0.992645633 | 0.423 | 0.509 | 0.000952625 | 19 |
| DSTN.15      | 4.28E-08  | 0.50057574   | 0.445 | 0.306 | 0.000984387 | 19 |
| HLA-F.13     | 4.32E-08  | -1.067914864 | 0.313 | 0.44  | 0.000991856 | 19 |
| CD99.13      | 4.78E-08  | -1.020733114 | 0.363 | 0.471 | 0.001097359 | 19 |
| SRSF10.6     | 5.14E-08  | 0.715833855  | 0.44  | 0.244 | 0.0011809   | 19 |
| ARHGEF1.14   | 5.46E-08  | -0.950045946 | 0.104 | 0.264 | 0.001254052 | 19 |
| CLEC2D.18    | 5.66E-08  | -0.935360279 | 0.137 | 0.309 | 0.001301551 | 19 |
| SMCHD1.8     | 6.35E-08  | -0.727186888 | 0.154 | 0.33  | 0.001458725 | 19 |
| ADGRE5.16    | 6.54E-08  | -0.955099749 | 0.143 | 0.301 | 0.001502447 | 19 |
| SNRNP70.4    | 1.01E-07  | 0.526630689  | 0.44  | 0.246 | 0.00231869  | 19 |
| LINC00152.12 | 1.10E-07  | -1.220244666 | 0.17  | 0.319 | 0.002525204 | 19 |
| HSPA8.11     | 1.14E-07  | -0.873266151 | 0.462 | 0.556 | 0.002628623 | 19 |
| FKBP5.12     | 1.21E-07  | 0.603701149  | 0.61  | 0.393 | 0.002777297 | 19 |
| S100A9.16    | 1.32E-07  | -2.158498959 | 0.082 | 0.253 | 0.003027098 | 19 |
| PRPF38B.14   | 1.42E-07  | -0.870910628 | 0.313 | 0.437 | 0.003261326 | 19 |
| EIF3F.3      | 1.64E-07  | -0.882206894 | 0.374 | 0.468 | 0.003773789 | 19 |
| UPF2.1       | 1.92E-07  | 0.606357689  | 0.396 | 0.217 | 0.004402426 | 19 |
| ARPC5.10     | 2.03E-07  | -0.940619417 | 0.335 | 0.437 | 0.004661435 | 19 |
| COX6B1.4     | 2.14E-07  | -0.803993696 | 0.407 | 0.575 | 0.004907371 | 19 |
| TES.1        | 2.19E-07  | 0.508023615  | 0.319 | 0.158 | 0.005027617 | 19 |
| ITGB1.11     | 2.38E-07  | -1.330459756 | 0.374 | 0.465 | 0.005468647 | 19 |
| MYEOV2.6     | 2.38E-07  | -0.943159057 | 0.214 | 0.349 | 0.005470657 | 19 |
| GNAI2.13     | 2.84E-07  | -0.903792666 | 0.121 | 0.262 | 0.006534622 | 19 |
| RGS10.12     | 3.12E-07  | -1.031783341 | 0.154 | 0.297 | 0.007159808 | 19 |
| KLF6.15      | 3.39E-07  | 0.757255672  | 0.813 | 0.647 | 0.007785104 | 19 |
| HMGB2.14     | 4.06E-07  | -0.997561457 | 0.396 | 0.477 | 0.009319386 | 19 |
| SMARCC2      | 4.70E-07  | 0.515861597  | 0.264 | 0.128 | 0.010799708 | 19 |
| NEDD9.3      | 5.59E-07  | 0.62545583   | 0.324 | 0.167 | 0.012838057 | 19 |
| HCLS1.12     | 5.94E-07  | -0.645376582 | 0.17  | 0.324 | 0.013650157 | 19 |
| MSN.10       | 6.62E-07  | -0.953397727 | 0.253 | 0.368 | 0.015215429 | 19 |
| DNAJB6.5     | 6.75E-07  | -0.989070379 | 0.214 | 0.341 | 0.015508783 | 19 |
| CDC42.4      | 6.76E-07  | -0.947462138 | 0.396 | 0.492 | 0.01553784  | 19 |
| CLIC1.7      | 7.11E-07  | -0.659032351 | 0.451 | 0.634 | 0.016336309 | 19 |
| ATP1B3.13    | 7.76E-07  | -1.042286418 | 0.137 | 0.27  | 0.0178376   | 19 |
| UBXN1.5      | 9.42E-07  | -0.712276404 | 0.286 | 0.393 | 0.021656628 | 19 |
| HLA-DQA1.13  | 1.26E-06  | -1.71829199  | 0.225 | 0.345 | 0.028986198 | 19 |
| ARL6IP5.12   | 1.38E-06  | -0.811902483 | 0.396 | 0.458 | 0.031646796 | 19 |
| SH3BGRL.11   | 1.43E-06  | -1.113032481 | 0.308 | 0.391 | 0.032754676 | 19 |
| NAP1L1.7     | 1.52E-06  | -0.703264212 | 0.473 | 0.566 | 0.034861029 | 19 |
| N4BP2L2.11   | 1.60E-06  | 0.861677537  | 0.72  | 0.527 | 0.036811912 | 19 |
| IFITM2.11    | 1.61E-06  | -1.142035356 | 0.379 | 0.477 | 0.036891143 | 19 |
| PSME2.8      | 1.66E-06  | -1.042316789 | 0.324 | 0.414 | 0.038077987 | 19 |
| LEPROTL1.10  | 1.71E-06  | -1.093319348 | 0.286 | 0.391 | 0.039301644 | 19 |
| CCNI.7       | 1.77E-06  | -0.647998475 | 0.473 | 0.595 | 0.040694381 | 19 |
| PSMB9.10     | 2.00E-06  | -0.549314453 | 0.401 | 0.485 | 0.045932739 | 19 |
| TAGLN.1      | 1.42E-191 | 4.223010109  | 0.607 | 0.063 | 3.26E-187   | 20 |
| TPM2.1       | 2.16E-168 | 3.832672646  | 0.509 | 0.049 | 4.97E-164   | 20 |
| RGS5.3       | 1.08E-154 | 4.16082084   | 0.723 | 0.119 | 2.47E-150   | 20 |
| ACTA2.2      | 9.11E-152 | 4.715776277  | 0.734 | 0.128 | 2.09E-147   | 20 |
| THY1.1       | 5.05E-147 | 3.78523424   | 0.439 | 0.041 | 1.16E-142   | 20 |
| MGP.4        | 4.43E-130 | 3.525070657  | 0.734 | 0.143 | 1.02E-125   | 20 |
| CALD1.4      | 1.16E-122 | 3.660676237  | 0.705 | 0.142 | 2.68E-118   | 20 |
| PLAC9.1      | 3.33E-112 | 3.069335586  | 0.324 | 0.028 | 7.66E-108   | 20 |
| MYL9.1       | 3.24E-111 | 3.601791039  | 0.497 | 0.071 | 7.44E-107   | 20 |
| FRZB.1       | 9.87E-108 | 2.738936301  | 0.289 | 0.023 | 2.27E-103   | 20 |
| IGFBP7.16    | 2.26E-101 | 3.267056995  | 0.925 | 0.372 | 5.19E-97    | 20 |



|               |          |              |       |       |          |    |
|---------------|----------|--------------|-------|-------|----------|----|
| BGN.1         | 1.10E-76 | 3.133334738  | 0.393 | 0.061 | 2.54E-72 | 20 |
| SPARC.5       | 1.93E-66 | 2.713029138  | 0.624 | 0.177 | 4.43E-62 | 20 |
| LGALS1.11     | 3.34E-58 | 2.731484248  | 0.838 | 0.569 | 7.68E-54 | 20 |
| CPE.1         | 2.73E-52 | 2.619906072  | 0.26  | 0.038 | 6.27E-48 | 20 |
| ADIRF.13      | 4.85E-49 | 3.168238781  | 0.613 | 0.237 | 1.12E-44 | 20 |
| CD36.2        | 6.72E-44 | 2.577593097  | 0.277 | 0.05  | 1.55E-39 | 20 |
| RGS1.19       | 4.38E-37 | -2.171573191 | 0.145 | 0.704 | 1.01E-32 | 20 |
| PTPRC.17      | 4.41E-37 | -1.782144959 | 0.064 | 0.623 | 1.01E-32 | 20 |
| NDUFA4L2.19   | 7.41E-37 | 2.174892354  | 0.624 | 0.284 | 1.70E-32 | 20 |
| CXCR4.14      | 6.63E-36 | -1.67408141  | 0.208 | 0.782 | 1.52E-31 | 20 |
| TIMP1.17      | 7.11E-35 | 3.020503666  | 0.595 | 0.311 | 1.63E-30 | 20 |
| SARAF.12      | 6.30E-34 | -1.065701662 | 0.11  | 0.685 | 1.45E-29 | 20 |
| BTG1.19       | 1.94E-33 | -1.476553957 | 0.318 | 0.849 | 4.45E-29 | 20 |
| MT2A.19       | 3.06E-33 | 1.584510286  | 0.815 | 0.657 | 7.03E-29 | 20 |
| CD74.14       | 7.59E-32 | -1.979295752 | 0.26  | 0.801 | 1.74E-27 | 20 |
| LAPTM5.15     | 2.81E-31 | -1.675177321 | 0.069 | 0.573 | 6.45E-27 | 20 |
| NEAT1.13      | 5.41E-31 | -1.531476299 | 0.214 | 0.76  | 1.24E-26 | 20 |
| TXNIP.15      | 5.70E-31 | -1.436915114 | 0.225 | 0.77  | 1.31E-26 | 20 |
| ZFP36L2.16    | 8.89E-31 | -1.562794075 | 0.168 | 0.705 | 2.04E-26 | 20 |
| CORO1A.16     | 3.87E-30 | -1.303036755 | 0.075 | 0.571 | 8.90E-26 | 20 |
| HLA-E.17      | 1.40E-29 | -1.071063689 | 0.214 | 0.797 | 3.22E-25 | 20 |
| RPS29.15      | 2.42E-29 | -1.019755952 | 0.607 | 0.925 | 5.55E-25 | 20 |
| HCST.15       | 5.94E-29 | -1.471500599 | 0.069 | 0.55  | 1.37E-24 | 20 |
| FYB.17        | 7.22E-28 | -1.939473299 | 0.023 | 0.465 | 1.66E-23 | 20 |
| SRGN.16       | 8.20E-28 | -1.335858932 | 0.266 | 0.798 | 1.88E-23 | 20 |
| PNISR.9       | 1.61E-27 | -1.417997805 | 0.052 | 0.516 | 3.70E-23 | 20 |
| SH3BGRL3.16   | 1.76E-27 | -0.966613705 | 0.162 | 0.688 | 4.06E-23 | 20 |
| KLF6.16       | 2.58E-27 | -1.110060954 | 0.139 | 0.655 | 5.94E-23 | 20 |
| CCL5.18       | 3.66E-27 | -2.111255127 | 0.104 | 0.567 | 8.42E-23 | 20 |
| SAT1.14       | 5.42E-27 | -1.685203526 | 0.15  | 0.637 | 1.25E-22 | 20 |
| EVL.18        | 6.15E-27 | -1.521059455 | 0.052 | 0.501 | 1.41E-22 | 20 |
| SRSF7.16      | 6.36E-27 | -1.280616056 | 0.081 | 0.55  | 1.46E-22 | 20 |
| ID3.3         | 7.47E-27 | 2.92715178   | 0.382 | 0.137 | 1.72E-22 | 20 |
| STK4.15       | 1.79E-26 | -1.607376798 | 0.04  | 0.477 | 4.10E-22 | 20 |
| ID2.14        | 1.88E-26 | -1.325423893 | 0.092 | 0.57  | 4.31E-22 | 20 |
| LSP1.19       | 2.44E-26 | -1.681937294 | 0.012 | 0.44  | 5.62E-22 | 20 |
| HMGN1.8       | 6.45E-26 | -1.028497116 | 0.052 | 0.51  | 1.48E-21 | 20 |
| MT-ND1.11     | 7.12E-26 | -1.050827575 | 0.26  | 0.793 | 1.64E-21 | 20 |
| ZFP36.12      | 2.16E-25 | -1.17692922  | 0.168 | 0.67  | 4.95E-21 | 20 |
| CD44.14       | 4.37E-25 | -1.194499397 | 0.052 | 0.497 | 1.00E-20 | 20 |
| NDUFA4.10     | 5.54E-25 | -1.151934253 | 0.092 | 0.545 | 1.27E-20 | 20 |
| CD53.13       | 8.71E-25 | -1.312440266 | 0.052 | 0.476 | 2.00E-20 | 20 |
| TMA7.12       | 1.25E-24 | -0.557401155 | 0.179 | 0.702 | 2.87E-20 | 20 |
| S100A10.11    | 3.14E-24 | -0.919923529 | 0.133 | 0.616 | 7.21E-20 | 20 |
| CD37.14       | 5.68E-24 | -1.284854293 | 0.052 | 0.468 | 1.31E-19 | 20 |
| DSTN.16       | 7.71E-24 | 2.467682318  | 0.532 | 0.305 | 1.77E-19 | 20 |
| CELF2.15      | 8.97E-24 | -1.3921993   | 0.029 | 0.431 | 2.06E-19 | 20 |
| CD52.15       | 3.19E-23 | -1.317344175 | 0.11  | 0.554 | 7.33E-19 | 20 |
| TPM3.10       | 3.80E-23 | -1.096936222 | 0.046 | 0.458 | 8.73E-19 | 20 |
| S100A6.10     | 6.21E-23 | -0.828230996 | 0.249 | 0.773 | 1.43E-18 | 20 |
| HLA-DPA1.16   | 7.50E-23 | -1.774767348 | 0.145 | 0.576 | 1.72E-18 | 20 |
| TRAC.20       | 1.82E-22 | -1.964464868 | 0.046 | 0.437 | 4.19E-18 | 20 |
| HLA-DPB1.16   | 2.93E-22 | -1.49719861  | 0.191 | 0.638 | 6.73E-18 | 20 |
| CD2.19        | 8.85E-22 | -1.591283039 | 0.064 | 0.462 | 2.03E-17 | 20 |
| ITGB2.17      | 9.24E-22 | -1.469161747 | 0.04  | 0.42  | 2.12E-17 | 20 |
| MT-ND2.11     | 9.81E-22 | -0.868457773 | 0.445 | 0.871 | 2.25E-17 | 20 |
| AC090498.1.11 | 1.14E-21 | -1.109013666 | 0.087 | 0.506 | 2.61E-17 | 20 |
| S100A4.17     | 1.30E-21 | -0.849933089 | 0.22  | 0.705 | 2.98E-17 | 20 |

|             |          |              |       |       |          |    |
|-------------|----------|--------------|-------|-------|----------|----|
| HLA-DRB1.15 | 1.94E-21 | -1.604084804 | 0.162 | 0.596 | 4.47E-17 | 20 |
| VAMP8.11    | 2.19E-21 | -0.783040917 | 0.064 | 0.466 | 5.03E-17 | 20 |
| GMFG.11     | 2.21E-21 | -0.688316818 | 0.121 | 0.561 | 5.07E-17 | 20 |
| HLA-F.14    | 2.52E-21 | -1.025432427 | 0.052 | 0.443 | 5.79E-17 | 20 |
| GZMA.19     | 3.56E-21 | -1.885325443 | 0.046 | 0.424 | 8.18E-17 | 20 |
| FXYD5.12    | 4.12E-21 | -0.653680124 | 0.081 | 0.486 | 9.47E-17 | 20 |
| MALAT1.18   | 4.39E-21 | -0.796982344 | 0.971 | 0.983 | 1.01E-16 | 20 |
| RPL17.13    | 5.29E-21 | -0.895642883 | 0.15  | 0.599 | 1.22E-16 | 20 |
| RPS15A.11   | 5.82E-21 | -0.736214683 | 0.618 | 0.938 | 1.34E-16 | 20 |
| CYTIP.17    | 6.08E-21 | -1.052893467 | 0.081 | 0.48  | 1.40E-16 | 20 |
| MT-ND5.11   | 7.70E-21 | -0.567201235 | 0.156 | 0.616 | 1.77E-16 | 20 |
| PABPC1.10   | 9.66E-21 | -0.562714717 | 0.185 | 0.669 | 2.22E-16 | 20 |
| HMGB2.15    | 1.16E-20 | -0.910785918 | 0.081 | 0.481 | 2.67E-16 | 20 |
| TSPO.10     | 1.37E-20 | -0.927600709 | 0.046 | 0.425 | 3.15E-16 | 20 |
| TNFAIP3.18  | 1.47E-20 | -1.242061365 | 0.064 | 0.452 | 3.39E-16 | 20 |
| DAZAP2.8    | 1.98E-20 | -0.943697744 | 0.035 | 0.404 | 4.55E-16 | 20 |
| SNHG8.8     | 2.19E-20 | -0.865734593 | 0.052 | 0.439 | 5.03E-16 | 20 |
| CD69.18     | 2.50E-20 | -1.526771527 | 0.127 | 0.534 | 5.74E-16 | 20 |
| PRRC2C.10   | 3.42E-20 | -0.889722863 | 0.058 | 0.438 | 7.86E-16 | 20 |
| MCL1.10     | 3.74E-20 | -0.639975873 | 0.104 | 0.52  | 8.60E-16 | 20 |
| CCNL1.11    | 3.86E-20 | -1.012770389 | 0.035 | 0.403 | 8.87E-16 | 20 |
| CD3E.19     | 3.89E-20 | -1.438561966 | 0.04  | 0.402 | 8.95E-16 | 20 |
| ARGLU1.11   | 4.84E-20 | -0.935246284 | 0.058 | 0.438 | 1.11E-15 | 20 |
| LCP1.17     | 4.90E-20 | -1.339057583 | 0.046 | 0.409 | 1.13E-15 | 20 |
| HLA-DRA.17  | 5.19E-20 | -1.735404314 | 0.243 | 0.678 | 1.19E-15 | 20 |
| HLA-DQB1.14 | 7.66E-20 | -1.57477282  | 0.035 | 0.397 | 1.76E-15 | 20 |
| FAM49B.13   | 9.35E-20 | -1.437932961 | 0.006 | 0.344 | 2.15E-15 | 20 |
| SPCS1.3     | 1.69E-19 | -0.786980047 | 0.04  | 0.405 | 3.89E-15 | 20 |
| RSRP1.11    | 2.14E-19 | -0.722951505 | 0.046 | 0.417 | 4.91E-15 | 20 |
| DDX3X.13    | 2.70E-19 | -0.810638069 | 0.052 | 0.419 | 6.20E-15 | 20 |
| COTL1.14    | 2.76E-19 | -1.094922144 | 0.069 | 0.439 | 6.35E-15 | 20 |
| TPM1.6      | 5.10E-19 | 2.303028308  | 0.405 | 0.192 | 1.17E-14 | 20 |
| FOSB.9      | 5.10E-19 | -1.271326095 | 0.064 | 0.43  | 1.17E-14 | 20 |
| CD3D.20     | 5.25E-19 | -1.068010692 | 0.092 | 0.479 | 1.21E-14 | 20 |
| KMT2E.13    | 5.85E-19 | -0.838382698 | 0.046 | 0.409 | 1.34E-14 | 20 |
| MYL6.11     | 6.04E-19 | 1.40569081   | 0.717 | 0.798 | 1.39E-14 | 20 |
| EIF3F.4     | 6.29E-19 | -0.506804951 | 0.081 | 0.471 | 1.45E-14 | 20 |
| IL2RG.20    | 6.82E-19 | -1.328564197 | 0.035 | 0.377 | 1.57E-14 | 20 |
| PRPF38B.15  | 9.46E-19 | -0.71959453  | 0.069 | 0.44  | 2.17E-14 | 20 |
| IFI16.9     | 9.93E-19 | -0.650671905 | 0.092 | 0.486 | 2.28E-14 | 20 |
| DUSP2.18    | 1.01E-18 | -1.365303271 | 0.075 | 0.436 | 2.32E-14 | 20 |
| CD48.17     | 1.02E-18 | -1.102572849 | 0.035 | 0.379 | 2.34E-14 | 20 |
| RAC2.18     | 1.02E-18 | -1.291922536 | 0.035 | 0.377 | 2.35E-14 | 20 |
| TRBC2.19    | 1.11E-18 | -1.555351406 | 0.04  | 0.381 | 2.56E-14 | 20 |
| MT-ND3.13   | 1.25E-18 | -0.723614828 | 0.399 | 0.836 | 2.88E-14 | 20 |
| CLEC2B.12   | 1.32E-18 | -1.020580632 | 0.035 | 0.382 | 3.03E-14 | 20 |
| ELF1.15     | 1.42E-18 | -0.68057832  | 0.069 | 0.445 | 3.26E-14 | 20 |
| RNF213.14   | 1.48E-18 | -0.807763126 | 0.04  | 0.392 | 3.40E-14 | 20 |
| IFITM3.17   | 1.52E-18 | 1.997593076  | 0.555 | 0.376 | 3.49E-14 | 20 |
| HMG2.6      | 2.13E-18 | -0.567108524 | 0.11  | 0.505 | 4.88E-14 | 20 |
| CCL4.20     | 2.39E-18 | -1.826989477 | 0.081 | 0.444 | 5.49E-14 | 20 |
| IER2.9      | 3.10E-18 | -1.058286726 | 0.052 | 0.405 | 7.11E-14 | 20 |
| POLR2J3.11  | 3.55E-18 | -0.828993458 | 0.046 | 0.399 | 8.15E-14 | 20 |
| AAK1.17     | 4.16E-18 | -0.91442794  | 0.035 | 0.375 | 9.57E-14 | 20 |
| KIAA1551.15 | 5.43E-18 | -1.319320238 | 0.017 | 0.339 | 1.25E-13 | 20 |
| DNAJB1.13   | 7.22E-18 | -0.98427714  | 0.064 | 0.424 | 1.66E-13 | 20 |
| FUS.14      | 7.52E-18 | -0.53727438  | 0.092 | 0.474 | 1.73E-13 | 20 |
| MT-ND4L.10  | 7.62E-18 | -1.063387153 | 0.035 | 0.365 | 1.75E-13 | 20 |

|                 |          |              |       |       |          |    |
|-----------------|----------|--------------|-------|-------|----------|----|
| LDHA.15         | 9.84E-18 | -0.715467077 | 0.162 | 0.584 | 2.26E-13 | 20 |
| PRR13.6         | 9.90E-18 | -0.555163656 | 0.046 | 0.396 | 2.28E-13 | 20 |
| RPSA.12         | 1.28E-17 | -0.632774761 | 0.329 | 0.81  | 2.95E-13 | 20 |
| HERPUD1.13      | 1.43E-17 | -0.886812809 | 0.116 | 0.497 | 3.28E-13 | 20 |
| ARL6IP5.13      | 1.45E-17 | -0.521619439 | 0.092 | 0.462 | 3.34E-13 | 20 |
| LITAF.13        | 1.53E-17 | -1.01411143  | 0.04  | 0.371 | 3.53E-13 | 20 |
| UCP2.15         | 1.55E-17 | -1.184031698 | 0.029 | 0.35  | 3.57E-13 | 20 |
| ATRX.11         | 1.75E-17 | -0.881463094 | 0.052 | 0.391 | 4.02E-13 | 20 |
| SRRM2.7         | 1.85E-17 | -1.005367196 | 0.023 | 0.345 | 4.24E-13 | 20 |
| ANKRD12.10      | 1.88E-17 | -0.821357249 | 0.052 | 0.393 | 4.33E-13 | 20 |
| AKAP13.12       | 2.06E-17 | -0.633060226 | 0.075 | 0.436 | 4.74E-13 | 20 |
| SERP1.6         | 2.10E-17 | -0.602905929 | 0.081 | 0.441 | 4.82E-13 | 20 |
| ACAP1.19        | 2.93E-17 | -1.293278201 | 0.023 | 0.337 | 6.74E-13 | 20 |
| ARF6.12         | 3.10E-17 | -0.669362926 | 0.046 | 0.384 | 7.14E-13 | 20 |
| WIPF1.18        | 4.06E-17 | -1.034223511 | 0.029 | 0.347 | 9.33E-13 | 20 |
| LEPROTL1.11     | 4.74E-17 | -0.711231576 | 0.052 | 0.393 | 1.09E-12 | 20 |
| REL.13          | 5.23E-17 | -1.220734723 | 0.017 | 0.326 | 1.20E-12 | 20 |
| DDX17.11        | 7.51E-17 | -0.799348227 | 0.064 | 0.403 | 1.73E-12 | 20 |
| DOCK8.15        | 8.67E-17 | -1.184917013 | 0     | 0.295 | 1.99E-12 | 20 |
| IDS.12          | 8.83E-17 | -0.755265539 | 0.046 | 0.377 | 2.03E-12 | 20 |
| ISG20.14        | 9.62E-17 | -1.045303265 | 0.046 | 0.365 | 2.21E-12 | 20 |
| GPSM3.14        | 1.37E-16 | -0.627600726 | 0.058 | 0.394 | 3.15E-12 | 20 |
| ALOX5AP.15      | 1.82E-16 | -1.365678211 | 0.023 | 0.332 | 4.18E-12 | 20 |
| PIK3IP1.18      | 1.84E-16 | -1.11559093  | 0.046 | 0.362 | 4.22E-12 | 20 |
| TRBC1.19        | 2.68E-16 | -1.700230425 | 0.046 | 0.357 | 6.15E-12 | 20 |
| SLA.16          | 3.13E-16 | -0.762069655 | 0.069 | 0.403 | 7.19E-12 | 20 |
| MBNL1.10        | 4.45E-16 | -0.752352976 | 0.04  | 0.359 | 1.02E-11 | 20 |
| CTSS.15         | 4.75E-16 | -1.375077307 | 0.052 | 0.367 | 1.09E-11 | 20 |
| GCC2.11         | 5.73E-16 | -0.729968094 | 0.046 | 0.363 | 1.32E-11 | 20 |
| RNASET2.17      | 5.89E-16 | -1.059304357 | 0.046 | 0.365 | 1.35E-11 | 20 |
| XIST.13         | 6.70E-16 | -0.782144142 | 0.087 | 0.428 | 1.54E-11 | 20 |
| BTG2.10         | 6.88E-16 | -0.844875924 | 0.046 | 0.361 | 1.58E-11 | 20 |
| LIMD2.18        | 7.04E-16 | -1.03906965  | 0.017 | 0.314 | 1.62E-11 | 20 |
| RP11-347P5.1.19 | 8.67E-16 | -1.059991536 | 0.064 | 0.379 | 1.99E-11 | 20 |
| RSRC2.10        | 8.83E-16 | -0.602071171 | 0.058 | 0.382 | 2.03E-11 | 20 |
| TCF25.6         | 9.59E-16 | -0.501231504 | 0.081 | 0.418 | 2.20E-11 | 20 |
| CST7.17         | 1.03E-15 | -1.206621581 | 0.069 | 0.393 | 2.37E-11 | 20 |
| YPEL5.12        | 1.18E-15 | -0.857958379 | 0.04  | 0.348 | 2.71E-11 | 20 |
| STK17A.17       | 1.36E-15 | -0.685127601 | 0.052 | 0.37  | 3.12E-11 | 20 |
| FNBP1.18        | 2.16E-15 | -0.709079289 | 0.058 | 0.371 | 4.96E-11 | 20 |
| TRA2B.7         | 2.34E-15 | -0.608960779 | 0.058 | 0.373 | 5.39E-11 | 20 |
| SPARCL1.4       | 2.51E-15 | 0.83610168   | 0.376 | 0.161 | 5.77E-11 | 20 |
| AKAP9.10        | 2.66E-15 | -0.809472521 | 0.04  | 0.345 | 6.11E-11 | 20 |
| TSC22D3.12      | 2.93E-15 | -0.677965397 | 0.335 | 0.786 | 6.73E-11 | 20 |
| CCND3.8         | 3.73E-15 | -0.777808908 | 0.058 | 0.363 | 8.58E-11 | 20 |
| EVI2B.12        | 4.53E-15 | -0.781970756 | 0.04  | 0.339 | 1.04E-10 | 20 |
| ZNF90.8         | 6.79E-15 | -0.640288151 | 0.052 | 0.357 | 1.56E-10 | 20 |
| RGS2.17         | 8.85E-15 | -1.410526064 | 0.046 | 0.339 | 2.03E-10 | 20 |
| GPBP1.12        | 9.10E-15 | -0.538648416 | 0.046 | 0.349 | 2.09E-10 | 20 |
| ARL6IP1.6       | 1.12E-14 | -0.605062149 | 0.035 | 0.324 | 2.56E-10 | 20 |
| EVI2A.14        | 1.13E-14 | -0.983668317 | 0.012 | 0.283 | 2.60E-10 | 20 |
| SMAP2.14        | 1.20E-14 | -1.018056327 | 0.023 | 0.301 | 2.75E-10 | 20 |
| RPS21.12        | 1.28E-14 | -0.670081648 | 0.422 | 0.868 | 2.94E-10 | 20 |
| CLEC2D.19       | 1.49E-14 | -1.087927323 | 0.029 | 0.31  | 3.42E-10 | 20 |
| ITM2A.19        | 1.86E-14 | -1.304442522 | 0.035 | 0.314 | 4.28E-10 | 20 |
| CDC42SE2.11     | 1.92E-14 | -0.722155563 | 0.035 | 0.319 | 4.42E-10 | 20 |
| NR4A2.16        | 2.09E-14 | -1.284344232 | 0.012 | 0.28  | 4.81E-10 | 20 |
| EIF4B.5         | 2.44E-14 | -0.634177682 | 0.058 | 0.361 | 5.61E-10 | 20 |

|              |          |              |       |       |          |    |
|--------------|----------|--------------|-------|-------|----------|----|
| IRF1.14      | 2.45E-14 | -1.029448001 | 0.035 | 0.314 | 5.62E-10 | 20 |
| LCK.20       | 3.48E-14 | -1.141978596 | 0.023 | 0.291 | 7.99E-10 | 20 |
| SMCHD1.9     | 4.34E-14 | -0.786084063 | 0.046 | 0.331 | 9.98E-10 | 20 |
| RPL28.13     | 8.01E-14 | -0.504349096 | 0.653 | 0.936 | 1.84E-09 | 20 |
| SERPINA1.19  | 8.07E-14 | -1.576806905 | 0.017 | 0.282 | 1.86E-09 | 20 |
| TAF1D.9      | 8.32E-14 | -0.553342716 | 0.04  | 0.322 | 1.91E-09 | 20 |
| GZMK.20      | 8.88E-14 | -1.657489005 | 0.081 | 0.369 | 2.04E-09 | 20 |
| PRKCH.15     | 1.04E-13 | -1.09732975  | 0.006 | 0.256 | 2.39E-09 | 20 |
| HSPB1.17     | 1.16E-13 | 1.845537508  | 0.543 | 0.433 | 2.66E-09 | 20 |
| MAP1LC3B.4   | 1.38E-13 | -0.631727019 | 0.04  | 0.319 | 3.16E-09 | 20 |
| NKG7.20      | 1.70E-13 | -1.431865723 | 0.127 | 0.431 | 3.90E-09 | 20 |
| ANXA1.16     | 1.86E-13 | -0.745560797 | 0.139 | 0.475 | 4.26E-09 | 20 |
| HSD17B11.7   | 1.87E-13 | -0.8225247   | 0.006 | 0.255 | 4.30E-09 | 20 |
| SERPINB1.7   | 2.08E-13 | -1.009301636 | 0.017 | 0.272 | 4.77E-09 | 20 |
| SYTL3.17     | 2.29E-13 | -1.14898301  | 0.023 | 0.28  | 5.26E-09 | 20 |
| DUSP1.15     | 2.74E-13 | -0.604278983 | 0.364 | 0.799 | 6.30E-09 | 20 |
| PPP1CA.5     | 2.83E-13 | -0.504016605 | 0.075 | 0.368 | 6.50E-09 | 20 |
| CNN3.5       | 2.87E-13 | 2.07949485   | 0.26  | 0.106 | 6.59E-09 | 20 |
| LTB.17       | 3.00E-13 | -1.355422067 | 0.04  | 0.305 | 6.90E-09 | 20 |
| ETS1.17      | 3.27E-13 | -0.5894133   | 0.058 | 0.342 | 7.52E-09 | 20 |
| PLP2.10      | 3.63E-13 | -0.723729881 | 0.035 | 0.298 | 8.35E-09 | 20 |
| CCNH.14      | 4.25E-13 | -0.822242075 | 0.029 | 0.287 | 9.76E-09 | 20 |
| DHRS7.8      | 4.69E-13 | -0.591278997 | 0.023 | 0.278 | 1.08E-08 | 20 |
| ADGRE5.17    | 4.71E-13 | -0.946362556 | 0.04  | 0.302 | 1.08E-08 | 20 |
| UFC1.3       | 4.84E-13 | -0.552733705 | 0.052 | 0.327 | 1.11E-08 | 20 |
| HLA-DMA.13   | 6.29E-13 | -0.996011006 | 0.029 | 0.29  | 1.45E-08 | 20 |
| GLRX.10      | 6.35E-13 | -0.554881778 | 0.035 | 0.301 | 1.46E-08 | 20 |
| PPP1R15A.9   | 8.83E-13 | -0.592034004 | 0.104 | 0.407 | 2.03E-08 | 20 |
| TUBA4A.17    | 9.11E-13 | -0.869615414 | 0.023 | 0.276 | 2.09E-08 | 20 |
| SAMSN1.12    | 9.16E-13 | -0.578736084 | 0.052 | 0.326 | 2.10E-08 | 20 |
| GNAI2.14     | 9.21E-13 | -0.630517208 | 0.017 | 0.263 | 2.12E-08 | 20 |
| GIMAP4.14    | 9.57E-13 | -0.506406332 | 0.064 | 0.342 | 2.20E-08 | 20 |
| MYO1F.14     | 9.59E-13 | -0.550402151 | 0.023 | 0.275 | 2.20E-08 | 20 |
| SEPT6.16     | 9.59E-13 | -0.843339924 | 0.029 | 0.281 | 2.20E-08 | 20 |
| PTP4A2.10    | 9.66E-13 | -0.71195705  | 0.023 | 0.274 | 2.22E-08 | 20 |
| CD3G.19      | 9.89E-13 | -0.798569697 | 0.035 | 0.296 | 2.27E-08 | 20 |
| PNN.10       | 1.14E-12 | -0.585190922 | 0.04  | 0.307 | 2.62E-08 | 20 |
| PCSK7.16     | 1.20E-12 | -0.522842113 | 0.052 | 0.324 | 2.77E-08 | 20 |
| RGS10.13     | 1.25E-12 | -0.665754007 | 0.04  | 0.298 | 2.88E-08 | 20 |
| SMDT1.5      | 1.30E-12 | -0.521989329 | 0.035 | 0.294 | 3.00E-08 | 20 |
| APOBEC3G.17  | 1.35E-12 | -0.748797748 | 0.023 | 0.275 | 3.09E-08 | 20 |
| EMB.16       | 1.44E-12 | -0.705846742 | 0.023 | 0.272 | 3.30E-08 | 20 |
| PIK3R1.14    | 1.45E-12 | -0.708926459 | 0.046 | 0.312 | 3.33E-08 | 20 |
| PSMA3-AS1.10 | 1.47E-12 | -0.903071013 | 0.029 | 0.278 | 3.37E-08 | 20 |
| IQGAP1.10    | 1.69E-12 | -0.630295461 | 0.064 | 0.341 | 3.88E-08 | 20 |
| BIRC3.16     | 2.23E-12 | -1.259769947 | 0.029 | 0.275 | 5.12E-08 | 20 |
| TYROBP.19    | 2.41E-12 | -1.09821039  | 0.11  | 0.391 | 5.54E-08 | 20 |
| ATM.10       | 2.43E-12 | -0.998951317 | 0.017 | 0.252 | 5.57E-08 | 20 |
| CD27.18      | 2.47E-12 | -1.260163214 | 0.029 | 0.27  | 5.68E-08 | 20 |
| AKNA.13      | 2.49E-12 | -0.822200628 | 0.023 | 0.264 | 5.71E-08 | 20 |
| ENSA.6       | 2.49E-12 | -0.559078315 | 0.058 | 0.327 | 5.73E-08 | 20 |
| CREM.13      | 2.68E-12 | -0.946914025 | 0.035 | 0.283 | 6.16E-08 | 20 |
| OCIAD2.15    | 3.53E-12 | -0.972057259 | 0.023 | 0.264 | 8.12E-08 | 20 |
| IL32.16      | 4.06E-12 | -0.678932697 | 0.225 | 0.582 | 9.33E-08 | 20 |
| RNF19A.16    | 4.73E-12 | -0.791604999 | 0.035 | 0.28  | 1.09E-07 | 20 |
| PSAP.16      | 4.92E-12 | -0.57631047  | 0.15  | 0.472 | 1.13E-07 | 20 |
| HLA-DRB5.16  | 5.75E-12 | -1.183967022 | 0.098 | 0.377 | 1.32E-07 | 20 |
| GIMAP7.17    | 6.00E-12 | -0.576311216 | 0.04  | 0.288 | 1.38E-07 | 20 |

|             |          |              |       |       |             |    |
|-------------|----------|--------------|-------|-------|-------------|----|
| MGEA5.12    | 6.57E-12 | -0.690126871 | 0.029 | 0.268 | 1.51E-07    | 20 |
| TMCO1.5     | 6.58E-12 | -0.591783211 | 0.04  | 0.287 | 1.51E-07    | 20 |
| MT-ND4.12   | 7.95E-12 | -0.548447684 | 0.491 | 0.879 | 1.83E-07    | 20 |
| ZNF207.9    | 9.31E-12 | -0.52707027  | 0.035 | 0.271 | 2.14E-07    | 20 |
| DHX36.8     | 1.07E-11 | -0.578530782 | 0.029 | 0.268 | 2.46E-07    | 20 |
| ORMDL1.4    | 1.36E-11 | -0.549687782 | 0.023 | 0.256 | 3.12E-07    | 20 |
| HLA-DQA1.14 | 1.38E-11 | -1.302073026 | 0.092 | 0.347 | 3.16E-07    | 20 |
| TYMP.11     | 1.40E-11 | -0.641365786 | 0.046 | 0.299 | 3.21E-07    | 20 |
| GPX1.14     | 1.48E-11 | -0.733511561 | 0.133 | 0.433 | 3.41E-07    | 20 |
| BTN3A2.11   | 1.50E-11 | -0.518045579 | 0.029 | 0.266 | 3.45E-07    | 20 |
| HLA-A.15    | 1.57E-11 | -0.563982763 | 0.555 | 0.898 | 3.62E-07    | 20 |
| FYN.13      | 1.62E-11 | -0.807378335 | 0.035 | 0.269 | 3.73E-07    | 20 |
| PRDM1.13    | 1.78E-11 | -0.723715155 | 0.046 | 0.295 | 4.09E-07    | 20 |
| DPP7.3      | 1.85E-11 | -0.529622888 | 0.035 | 0.272 | 4.24E-07    | 20 |
| TRAF3IP3.18 | 2.33E-11 | -0.691671951 | 0.029 | 0.259 | 5.35E-07    | 20 |
| IDH2.7      | 2.47E-11 | -0.502121214 | 0.029 | 0.263 | 5.67E-07    | 20 |
| PLIN2.14    | 2.77E-11 | -0.747199741 | 0.075 | 0.339 | 6.36E-07    | 20 |
| EPC1.11     | 2.93E-11 | -0.657551516 | 0.04  | 0.273 | 6.72E-07    | 20 |
| CD96.19     | 3.05E-11 | -0.976040759 | 0.029 | 0.252 | 7.01E-07    | 20 |
| IL7R.17     | 5.24E-11 | -1.451399445 | 0.069 | 0.306 | 1.20E-06    | 20 |
| GLUL.13     | 5.46E-11 | -0.555867375 | 0.064 | 0.309 | 1.25E-06    | 20 |
| CTSB.15     | 5.56E-11 | -0.630879376 | 0.058 | 0.305 | 1.28E-06    | 20 |
| WNK1.11     | 6.11E-11 | -0.612593066 | 0.029 | 0.252 | 1.40E-06    | 20 |
| IL10RA.15   | 6.43E-11 | -0.646706888 | 0.035 | 0.261 | 1.48E-06    | 20 |
| RAB2A.7     | 6.63E-11 | -0.523615118 | 0.04  | 0.272 | 1.52E-06    | 20 |
| C9orf142.14 | 7.00E-11 | -0.571760134 | 0.035 | 0.264 | 1.61E-06    | 20 |
| PHLDA1.2    | 8.06E-11 | 2.153877174  | 0.289 | 0.146 | 1.85E-06    | 20 |
| FCER1G.17   | 8.09E-11 | -1.060546345 | 0.064 | 0.306 | 1.86E-06    | 20 |
| CD7.16      | 8.15E-11 | -0.760300454 | 0.064 | 0.303 | 1.87E-06    | 20 |
| CMC1.16     | 9.21E-11 | -1.040070043 | 0.052 | 0.288 | 2.12E-06    | 20 |
| C10orf54.12 | 1.15E-10 | -0.511830012 | 0.052 | 0.284 | 2.65E-06    | 20 |
| BIN2.14     | 1.54E-10 | -0.661224464 | 0.035 | 0.252 | 3.53E-06    | 20 |
| ODF2L.11    | 4.45E-10 | -0.737161723 | 0.046 | 0.262 | 1.02E-05    | 20 |
| RPL30.9     | 5.99E-10 | -0.527245654 | 0.532 | 0.902 | 1.38E-05    | 20 |
| RGCC.17     | 1.84E-09 | -0.750326493 | 0.081 | 0.31  | 4.23E-05    | 20 |
| NPC2.14     | 3.45E-09 | -0.533533428 | 0.133 | 0.382 | 7.92E-05    | 20 |
| ACTB.15     | 1.24E-08 | 0.628059969  | 0.827 | 0.93  | 0.000284576 | 20 |
| CUTA.7      | 1.27E-08 | 0.551755016  | 0.145 | 0.419 | 0.000291581 | 20 |
| COX8A.7     | 1.42E-08 | 0.511485629  | 0.191 | 0.503 | 0.000327075 | 20 |
| SOD2.15     | 1.55E-08 | -0.597719405 | 0.081 | 0.296 | 0.000357114 | 20 |
| TRMT112.7   | 3.37E-08 | 0.601372096  | 0.15  | 0.425 | 0.000773563 | 20 |
| LYZ.16      | 5.61E-08 | -1.300262415 | 0.139 | 0.354 | 0.001289079 | 20 |
| VPS28.3     | 8.72E-08 | 0.531717725  | 0.116 | 0.349 | 0.00200324  | 20 |
| APOC1.14    | 1.26E-07 | -1.07392094  | 0.092 | 0.286 | 0.002899522 | 20 |
| SEC61B.4    | 1.29E-07 | 0.579244254  | 0.168 | 0.431 | 0.002969481 | 20 |
| RHOA.15     | 1.37E-07 | 0.520590746  | 0.214 | 0.512 | 0.003154613 | 20 |
| SEC11A.8    | 1.77E-07 | 0.545082891  | 0.116 | 0.342 | 0.004074846 | 20 |
| REEP5.4     | 1.79E-07 | 0.664359396  | 0.092 | 0.305 | 0.004106021 | 20 |
| ATP5J2.7    | 1.97E-07 | 0.671030526  | 0.162 | 0.435 | 0.004520454 | 20 |
| APOE.12     | 2.02E-07 | -1.109287206 | 0.197 | 0.441 | 0.004632221 | 20 |
| NUCKS1.8    | 3.06E-07 | 0.629331313  | 0.15  | 0.401 | 0.007022419 | 20 |
| AIF1.17     | 4.04E-07 | -0.647336746 | 0.081 | 0.261 | 0.009276214 | 20 |
| COX5A.7     | 9.11E-07 | 0.517378913  | 0.116 | 0.324 | 0.020930758 | 20 |
| CAPZA1.5    | 9.20E-07 | 0.524423474  | 0.098 | 0.3   | 0.021134296 | 20 |
| NEDD8.7     | 1.07E-06 | 0.542019991  | 0.179 | 0.434 | 0.024699709 | 20 |
| NOP10.8     | 1.13E-06 | 0.564429302  | 0.127 | 0.34  | 0.025968654 | 20 |
| FKBP8.3     | 1.15E-06 | 0.514238239  | 0.121 | 0.335 | 0.02638283  | 20 |
| CST3.19     | 1.16E-06 | 0.902446268  | 0.491 | 0.384 | 0.026678108 | 20 |

|             |           |             |       |       |             |    |
|-------------|-----------|-------------|-------|-------|-------------|----|
| NDUFA13.7   | 1.38E-06  | 0.657072776 | 0.191 | 0.454 | 0.031712634 | 20 |
| KTN1.11     | 1.44E-06  | 0.602057568 | 0.15  | 0.386 | 0.033085959 | 20 |
| C14orf166.8 | 1.82E-06  | 0.639750882 | 0.121 | 0.335 | 0.041897076 | 20 |
| COX6C.7     | 1.92E-06  | 0.570343527 | 0.254 | 0.571 | 0.044056334 | 20 |
| ATP5G3.6    | 1.96E-06  | 0.538290579 | 0.168 | 0.41  | 0.045074833 | 20 |
| ACKR1       | 0         | 3.714431629 | 0.91  | 0.009 | 0           | 21 |
| COL8A1.1    | 0         | 2.795828017 | 0.854 | 0.031 | 0           | 21 |
| RAMP3.1     | 0         | 2.760583319 | 0.944 | 0.045 | 0           | 21 |
| CPE.2       | 0         | 2.723408518 | 0.876 | 0.035 | 0           | 21 |
| MPZL2.1     | 0         | 2.605797947 | 0.888 | 0.031 | 0           | 21 |
| SLCO2A1.1   | 0         | 2.494282448 | 0.809 | 0.021 | 0           | 21 |
| FBLN2       | 0         | 2.419278091 | 0.629 | 0.003 | 0           | 21 |
| POSTN       | 0         | 2.319432713 | 0.326 | 0.003 | 0           | 21 |
| PTPRB.1     | 0         | 2.272412694 | 0.843 | 0.032 | 0           | 21 |
| PALMD.1     | 0         | 2.233723167 | 0.854 | 0.026 | 0           | 21 |
| NTS         | 0         | 2.18271241  | 0.472 | 0.003 | 0           | 21 |
| COL3A1.1    | 0         | 2.108844902 | 0.674 | 0.017 | 0           | 21 |
| TFF3        | 0         | 1.976063934 | 0.719 | 0.007 | 0           | 21 |
| CCL14       | 0         | 1.844051764 | 0.607 | 0.007 | 0           | 21 |
| ECSCR.1     | 0         | 1.768647178 | 0.933 | 0.04  | 0           | 21 |
| IL33        | 0         | 1.723736286 | 0.64  | 0.004 | 0           | 21 |
| HSPA2       | 0         | 1.670151612 | 0.584 | 0.017 | 0           | 21 |
| NR2F2.1     | 0         | 1.656725547 | 0.708 | 0.024 | 0           | 21 |
| MMRN1       | 0         | 1.601066105 | 0.416 | 0.006 | 0           | 21 |
| MMRN2.1     | 0         | 1.588604814 | 0.73  | 0.027 | 0           | 21 |
| PPIC.2      | 0         | 1.580373123 | 0.764 | 0.027 | 0           | 21 |
| MALL        | 0         | 1.569678476 | 0.64  | 0.014 | 0           | 21 |
| MEIS2.1     | 0         | 1.562794827 | 0.539 | 0.014 | 0           | 21 |
| ADAMTS18    | 0         | 1.233178334 | 0.371 | 0     | 0           | 21 |
| TPD52L1     | 0         | 1.207469099 | 0.506 | 0.007 | 0           | 21 |
| RSPO3       | 0         | 1.196475408 | 0.427 | 0.001 | 0           | 21 |
| ELN         | 0         | 1.193773627 | 0.427 | 0.002 | 0           | 21 |
| SELP        | 0         | 1.193360519 | 0.427 | 0.002 | 0           | 21 |
| NRN1        | 0         | 1.165442897 | 0.573 | 0.011 | 0           | 21 |
| SRPX        | 0         | 1.146135781 | 0.449 | 0.002 | 0           | 21 |
| CPXM2       | 0         | 1.079087894 | 0.461 | 0.003 | 0           | 21 |
| TLL1        | 0         | 1.060349474 | 0.438 | 0.003 | 0           | 21 |
| TEK         | 0         | 1.053015307 | 0.461 | 0.008 | 0           | 21 |
| VEGFC       | 0         | 0.981533807 | 0.461 | 0.005 | 0           | 21 |
| RASSF9      | 0         | 0.969971583 | 0.393 | 0.002 | 0           | 21 |
| GPM6A       | 0         | 0.949789215 | 0.416 | 0.004 | 0           | 21 |
| PTGIS       | 0         | 0.848546555 | 0.315 | 0.002 | 0           | 21 |
| DOC2B       | 0         | 0.808439147 | 0.416 | 0.003 | 0           | 21 |
| RAB3C       | 0         | 0.806810672 | 0.337 | 0.001 | 0           | 21 |
| MMP28       | 0         | 0.780007336 | 0.382 | 0.004 | 0           | 21 |
| LHX6        | 0         | 0.616984486 | 0.258 | 0.001 | 0           | 21 |
| THSD7A.1    | 2.52E-307 | 1.402737705 | 0.607 | 0.018 | 5.80E-303   | 21 |
| ITGB4       | 3.86E-306 | 0.731630581 | 0.382 | 0.007 | 8.87E-302   | 21 |
| CYYR1.1     | 4.39E-297 | 1.569402471 | 0.685 | 0.025 | 1.01E-292   | 21 |
| PCAT19.1    | 3.90E-290 | 1.932215475 | 0.843 | 0.039 | 8.96E-286   | 21 |
| TM4SF1.1    | 4.93E-289 | 3.038850923 | 0.966 | 0.056 | 1.13E-284   | 21 |
| EPHB4       | 1.20E-287 | 0.869071933 | 0.427 | 0.009 | 2.75E-283   | 21 |
| TSPAN7.1    | 5.77E-284 | 1.646243794 | 0.719 | 0.029 | 1.33E-279   | 21 |
| CNTNAP3B    | 1.54E-279 | 1.309703187 | 0.472 | 0.012 | 3.54E-275   | 21 |
| BMP4        | 7.91E-278 | 0.77394566  | 0.258 | 0.003 | 1.82E-273   | 21 |
| PCDH17.1    | 3.27E-276 | 1.424723461 | 0.494 | 0.013 | 7.51E-272   | 21 |
| ERG.1       | 2.89E-275 | 1.049725112 | 0.551 | 0.017 | 6.65E-271   | 21 |
| ZNF521      | 2.12E-272 | 0.740392481 | 0.36  | 0.007 | 4.86E-268   | 21 |

|           |           |             |       |       |           |    |
|-----------|-----------|-------------|-------|-------|-----------|----|
| CYP1B1.1  | 3.74E-272 | 1.437296347 | 0.461 | 0.012 | 8.59E-268 | 21 |
| FAM167B.1 | 4.25E-266 | 1.859314017 | 0.708 | 0.03  | 9.77E-262 | 21 |
| ADGRG6    | 7.93E-266 | 1.571245719 | 0.528 | 0.017 | 1.82E-261 | 21 |
| TMTC1.1   | 6.07E-263 | 1.593111673 | 0.596 | 0.021 | 1.40E-258 | 21 |
| CXorf36.1 | 1.41E-253 | 1.594261574 | 0.663 | 0.027 | 3.24E-249 | 21 |
| FAM171A1  | 5.57E-250 | 0.51923403  | 0.27  | 0.004 | 1.28E-245 | 21 |
| CLEC14A.2 | 3.34E-248 | 2.096830897 | 0.899 | 0.052 | 7.68E-244 | 21 |
| HSPG2.1   | 5.54E-247 | 2.339077036 | 0.921 | 0.058 | 1.27E-242 | 21 |
| PGM5      | 7.30E-243 | 0.987102168 | 0.416 | 0.011 | 1.68E-238 | 21 |
| SNCG.1    | 1.27E-242 | 1.658736711 | 0.719 | 0.035 | 2.92E-238 | 21 |
| CALCRL.1  | 9.19E-241 | 2.002333919 | 0.787 | 0.042 | 2.11E-236 | 21 |
| NUAK1.1   | 7.85E-240 | 1.362915868 | 0.551 | 0.02  | 1.81E-235 | 21 |
| RAMP2.2   | 6.04E-239 | 2.636766379 | 0.933 | 0.061 | 1.39E-234 | 21 |
| FAM107A.1 | 1.23E-237 | 1.310944328 | 0.551 | 0.02  | 2.82E-233 | 21 |
| MTUS1.2   | 5.32E-237 | 2.25582534  | 0.865 | 0.055 | 1.22E-232 | 21 |
| SYT15     | 7.25E-237 | 0.705342278 | 0.348 | 0.007 | 1.67E-232 | 21 |
| HEG1.1    | 3.87E-232 | 2.024384505 | 0.708 | 0.036 | 8.88E-228 | 21 |
| PLSCR4    | 2.28E-228 | 0.968776004 | 0.461 | 0.014 | 5.24E-224 | 21 |
| WWTR1.3   | 1.17E-226 | 2.296887406 | 0.831 | 0.052 | 2.68E-222 | 21 |
| PIR       | 1.06E-223 | 0.96683776  | 0.371 | 0.009 | 2.43E-219 | 21 |
| PROCR     | 5.53E-223 | 1.61430575  | 0.697 | 0.036 | 1.27E-218 | 21 |
| FGD5.1    | 1.33E-220 | 0.759724631 | 0.427 | 0.013 | 3.06E-216 | 21 |
| VWF.1     | 6.89E-219 | 4.094415146 | 0.978 | 0.083 | 1.58E-214 | 21 |
| LIMS2.1   | 4.44E-218 | 1.119725984 | 0.539 | 0.021 | 1.02E-213 | 21 |
| PLA1A     | 1.26E-216 | 0.901312675 | 0.36  | 0.009 | 2.90E-212 | 21 |
| CDC42EP5  | 6.07E-216 | 0.619054619 | 0.337 | 0.008 | 1.39E-211 | 21 |
| JAM2      | 2.10E-213 | 1.197073041 | 0.517 | 0.02  | 4.83E-209 | 21 |
| SEMA6A    | 4.95E-213 | 1.027368845 | 0.427 | 0.013 | 1.14E-208 | 21 |
| ADGRL4.2  | 2.87E-212 | 1.777578113 | 0.831 | 0.051 | 6.60E-208 | 21 |
| LDB2.1    | 1.47E-211 | 1.696235612 | 0.775 | 0.046 | 3.38E-207 | 21 |
| PALM      | 2.55E-210 | 0.788336862 | 0.326 | 0.007 | 5.85E-206 | 21 |
| PLAT.1    | 4.70E-207 | 1.683150799 | 0.517 | 0.021 | 1.08E-202 | 21 |
| NPDC1.1   | 3.46E-205 | 2.091117764 | 0.831 | 0.057 | 7.94E-201 | 21 |
| RNASE1.2  | 4.83E-205 | 3.053899288 | 1     | 0.087 | 1.11E-200 | 21 |
| SDPR.2    | 5.68E-203 | 2.658064298 | 0.944 | 0.075 | 1.31E-198 | 21 |
| HYAL1     | 1.17E-201 | 0.743175125 | 0.371 | 0.01  | 2.69E-197 | 21 |
| EGFL7.1   | 8.95E-200 | 1.86162427  | 0.775 | 0.049 | 2.06E-195 | 21 |
| HYAL2.1   | 1.89E-199 | 2.423949108 | 0.876 | 0.066 | 4.35E-195 | 21 |
| LRP5      | 1.09E-197 | 0.626360629 | 0.303 | 0.007 | 2.51E-193 | 21 |
| NOSTRIN.1 | 3.52E-195 | 1.635761327 | 0.618 | 0.032 | 8.09E-191 | 21 |
| PLCB4.1   | 6.06E-195 | 0.924021254 | 0.461 | 0.017 | 1.39E-190 | 21 |
| EMCN.2    | 1.63E-194 | 1.407502037 | 0.64  | 0.034 | 3.74E-190 | 21 |
| HSPA12B   | 6.26E-192 | 0.625428818 | 0.315 | 0.008 | 1.44E-187 | 21 |
| EMP1.1    | 7.67E-192 | 1.98668136  | 0.685 | 0.04  | 1.76E-187 | 21 |
| TIE1.1    | 2.72E-191 | 1.093654591 | 0.528 | 0.023 | 6.26E-187 | 21 |
| RHOJ      | 5.96E-191 | 0.833236711 | 0.371 | 0.011 | 1.37E-186 | 21 |
| CTGF.2    | 1.62E-190 | 3.828641996 | 0.697 | 0.043 | 3.72E-186 | 21 |
| FBN1      | 3.70E-189 | 0.834001175 | 0.393 | 0.013 | 8.51E-185 | 21 |
| PTRF.3    | 5.89E-185 | 2.061822621 | 0.91  | 0.076 | 1.35E-180 | 21 |
| MEDAG     | 1.37E-184 | 0.686727582 | 0.27  | 0.006 | 3.15E-180 | 21 |
| LRR1      | 6.07E-184 | 0.780781738 | 0.371 | 0.012 | 1.40E-179 | 21 |
| LIFR.1    | 1.19E-182 | 1.337357436 | 0.674 | 0.04  | 2.73E-178 | 21 |
| ZNF385D   | 1.87E-181 | 0.832546161 | 0.393 | 0.013 | 4.29E-177 | 21 |
| DNASE1L3  | 1.98E-179 | 1.298799327 | 0.326 | 0.009 | 4.55E-175 | 21 |
| EFEMP1    | 5.01E-179 | 2.776660745 | 0.449 | 0.018 | 1.15E-174 | 21 |
| SEPN1     | 1.84E-177 | 1.081885318 | 0.551 | 0.028 | 4.24E-173 | 21 |
| ROBO4.1   | 1.35E-176 | 1.066913873 | 0.461 | 0.019 | 3.11E-172 | 21 |
| SH3BGRL2  | 5.23E-175 | 0.820302445 | 0.337 | 0.01  | 1.20E-170 | 21 |

|               |           |             |       |       |           |    |
|---------------|-----------|-------------|-------|-------|-----------|----|
| MID1          | 5.50E-174 | 0.877616005 | 0.36  | 0.012 | 1.26E-169 | 21 |
| PODXL.1       | 9.81E-173 | 1.188618067 | 0.596 | 0.032 | 2.25E-168 | 21 |
| LMO2.1        | 2.88E-172 | 1.202015014 | 0.618 | 0.037 | 6.62E-168 | 21 |
| LMCD1.1       | 8.81E-171 | 1.32240496  | 0.629 | 0.037 | 2.02E-166 | 21 |
| LIMCH1.1      | 4.66E-168 | 1.028327046 | 0.539 | 0.028 | 1.07E-163 | 21 |
| FRY.1         | 1.53E-166 | 0.876216198 | 0.483 | 0.022 | 3.52E-162 | 21 |
| PLPP3.1       | 1.58E-166 | 1.870405245 | 0.764 | 0.057 | 3.62E-162 | 21 |
| FLNB          | 1.83E-165 | 1.356640538 | 0.629 | 0.04  | 4.21E-161 | 21 |
| PCGF2         | 6.29E-164 | 0.920711495 | 0.449 | 0.02  | 1.45E-159 | 21 |
| CADPS2        | 9.29E-163 | 0.630051492 | 0.292 | 0.008 | 2.13E-158 | 21 |
| DOCK9.1       | 1.83E-160 | 1.320069578 | 0.652 | 0.042 | 4.21E-156 | 21 |
| FGFR1.1       | 8.05E-160 | 1.407850921 | 0.596 | 0.036 | 1.85E-155 | 21 |
| CDH5.1        | 9.10E-160 | 1.242942206 | 0.528 | 0.028 | 2.09E-155 | 21 |
| PBX1          | 1.42E-159 | 0.758859432 | 0.393 | 0.015 | 3.27E-155 | 21 |
| EMP2.2        | 3.17E-159 | 1.242939248 | 0.607 | 0.038 | 7.28E-155 | 21 |
| MANSC1        | 1.14E-158 | 0.760266931 | 0.461 | 0.021 | 2.62E-154 | 21 |
| ADCY4         | 1.04E-157 | 0.892297351 | 0.393 | 0.015 | 2.38E-153 | 21 |
| IL1R1         | 1.38E-156 | 0.919640362 | 0.404 | 0.017 | 3.16E-152 | 21 |
| MIR99AHG      | 7.40E-156 | 0.541292545 | 0.258 | 0.006 | 1.70E-151 | 21 |
| TSHZ2         | 1.80E-155 | 1.301800969 | 0.551 | 0.031 | 4.14E-151 | 21 |
| PTPRG.2       | 7.99E-155 | 1.121335783 | 0.539 | 0.03  | 1.84E-150 | 21 |
| RP11-382A20.3 | 3.18E-153 | 1.072311385 | 0.551 | 0.032 | 7.30E-149 | 21 |
| CD109         | 4.42E-153 | 0.913432807 | 0.427 | 0.019 | 1.02E-148 | 21 |
| AQP1.1        | 3.75E-152 | 1.940788848 | 0.719 | 0.056 | 8.61E-148 | 21 |
| TGM2.3        | 3.82E-152 | 1.509487326 | 0.73  | 0.058 | 8.78E-148 | 21 |
| CD34.1        | 7.54E-152 | 1.096784991 | 0.607 | 0.038 | 1.73E-147 | 21 |
| RAI14.1       | 9.43E-151 | 0.860128315 | 0.438 | 0.02  | 2.17E-146 | 21 |
| FAM198B.1     | 1.25E-149 | 1.357496262 | 0.551 | 0.034 | 2.87E-145 | 21 |
| ACVRL1.1      | 2.70E-149 | 0.905723233 | 0.483 | 0.025 | 6.20E-145 | 21 |
| LAMA4.1       | 4.20E-149 | 1.253111812 | 0.539 | 0.031 | 9.66E-145 | 21 |
| ADAM15        | 5.82E-148 | 1.312714624 | 0.573 | 0.037 | 1.34E-143 | 21 |
| MARCKSL1.2    | 8.68E-148 | 1.909660626 | 0.843 | 0.082 | 1.99E-143 | 21 |
| FAM84B        | 9.45E-145 | 0.95303211  | 0.393 | 0.017 | 2.17E-140 | 21 |
| EPB41L4A.1    | 1.10E-144 | 0.934961568 | 0.483 | 0.026 | 2.53E-140 | 21 |
| ENG.3         | 4.02E-143 | 2.316042535 | 0.91  | 0.102 | 9.25E-139 | 21 |
| TFPI.4        | 4.33E-143 | 1.912734278 | 0.764 | 0.068 | 9.95E-139 | 21 |
| NFIB.4        | 4.38E-143 | 1.570442382 | 0.775 | 0.068 | 1.01E-138 | 21 |
| TCN2.1        | 2.75E-142 | 1.516031123 | 0.663 | 0.052 | 6.32E-138 | 21 |
| CRIP2.4       | 7.27E-142 | 1.788221185 | 0.91  | 0.097 | 1.67E-137 | 21 |
| MAP2.1        | 2.21E-141 | 0.698391421 | 0.292 | 0.009 | 5.08E-137 | 21 |
| MYCT1.1       | 1.68E-140 | 0.924064112 | 0.404 | 0.018 | 3.86E-136 | 21 |
| RUNX1T1       | 5.25E-140 | 0.746956638 | 0.315 | 0.011 | 1.21E-135 | 21 |
| CTNNAL1       | 8.60E-138 | 1.274849759 | 0.528 | 0.033 | 1.98E-133 | 21 |
| CFH.1         | 9.13E-138 | 0.955908383 | 0.449 | 0.024 | 2.10E-133 | 21 |
| MYO5C         | 1.16E-137 | 0.628759955 | 0.281 | 0.009 | 2.67E-133 | 21 |
| TGFBR3        | 1.67E-137 | 1.166100997 | 0.539 | 0.034 | 3.83E-133 | 21 |
| ITGA6.1       | 3.18E-137 | 1.644083189 | 0.753 | 0.068 | 7.30E-133 | 21 |
| SASH1.2       | 5.40E-136 | 0.954926156 | 0.539 | 0.034 | 1.24E-131 | 21 |
| FN1.3         | 1.95E-135 | 2.820432885 | 0.933 | 0.119 | 4.49E-131 | 21 |
| ACKR3.1       | 4.13E-135 | 1.406837144 | 0.404 | 0.02  | 9.50E-131 | 21 |
| MECOM.1       | 2.43E-134 | 0.647862721 | 0.371 | 0.016 | 5.58E-130 | 21 |
| SLC9A3R2.2    | 2.19E-133 | 1.081177014 | 0.73  | 0.061 | 5.04E-129 | 21 |
| HRCT1.1       | 4.78E-133 | 0.862163393 | 0.416 | 0.021 | 1.10E-128 | 21 |
| SHE.1         | 8.01E-133 | 0.589363004 | 0.303 | 0.011 | 1.84E-128 | 21 |
| ADAMTS1.1     | 8.71E-133 | 1.668302771 | 0.461 | 0.026 | 2.00E-128 | 21 |
| HAPLN3        | 3.31E-132 | 1.011996536 | 0.472 | 0.027 | 7.60E-128 | 21 |
| FZD4.1        | 1.77E-129 | 0.898717454 | 0.427 | 0.022 | 4.06E-125 | 21 |
| IGFBP4.4      | 2.76E-129 | 2.323024098 | 0.91  | 0.113 | 6.34E-125 | 21 |



|            |           |             |       |       |           |    |
|------------|-----------|-------------|-------|-------|-----------|----|
| GAS6.2     | 7.36E-129 | 1.44747285  | 0.742 | 0.071 | 1.69E-124 | 21 |
| SEMA3F.1   | 1.24E-128 | 0.777361191 | 0.326 | 0.013 | 2.85E-124 | 21 |
| CRIM1.3    | 3.39E-128 | 2.003115161 | 0.764 | 0.076 | 7.79E-124 | 21 |
| C8orf4     | 1.98E-127 | 1.160606178 | 0.382 | 0.018 | 4.54E-123 | 21 |
| TMEM255B.1 | 3.55E-127 | 0.859168276 | 0.494 | 0.031 | 8.16E-123 | 21 |
| PLAC9.2    | 1.48E-126 | 0.986000716 | 0.483 | 0.029 | 3.40E-122 | 21 |
| RFK.1      | 7.67E-126 | 1.611318444 | 0.719 | 0.069 | 1.76E-121 | 21 |
| DIXDC1.2   | 1.90E-125 | 0.780512502 | 0.449 | 0.026 | 4.36E-121 | 21 |
| AHNAK2.1   | 3.48E-125 | 0.560198072 | 0.303 | 0.012 | 8.01E-121 | 21 |
| SOCS2.1    | 1.12E-124 | 1.001858238 | 0.472 | 0.029 | 2.58E-120 | 21 |
| EPAS1.4    | 1.38E-122 | 1.865730787 | 0.91  | 0.11  | 3.17E-118 | 21 |
| IFI27.5    | 5.64E-122 | 2.705313483 | 1     | 0.149 | 1.30E-117 | 21 |
| S100A16.3  | 3.35E-120 | 1.341889041 | 0.764 | 0.077 | 7.70E-116 | 21 |
| ESAM.2     | 4.59E-120 | 1.09828808  | 0.685 | 0.06  | 1.06E-115 | 21 |
| TINAGL1.3  | 5.11E-120 | 1.246625351 | 0.618 | 0.051 | 1.17E-115 | 21 |
| S1PR1.1    | 9.75E-120 | 1.068508478 | 0.584 | 0.045 | 2.24E-115 | 21 |
| PDLIM4     | 1.52E-118 | 0.50677541  | 0.258 | 0.009 | 3.50E-114 | 21 |
| SESN3.1    | 7.73E-118 | 1.839078727 | 0.64  | 0.06  | 1.78E-113 | 21 |
| CFI.1      | 2.05E-117 | 1.023773173 | 0.483 | 0.032 | 4.71E-113 | 21 |
| NPR1       | 2.24E-115 | 0.534238679 | 0.281 | 0.011 | 5.15E-111 | 21 |
| PTPN14.1   | 1.27E-114 | 0.837987545 | 0.483 | 0.033 | 2.92E-110 | 21 |
| SPTBN1.2   | 5.21E-114 | 1.776058151 | 0.82  | 0.098 | 1.20E-109 | 21 |
| TCF4.3     | 1.51E-113 | 1.919569684 | 0.865 | 0.114 | 3.48E-109 | 21 |
| RAPGEF5.2  | 6.40E-113 | 0.96577902  | 0.472 | 0.031 | 1.47E-108 | 21 |
| NID1.2     | 8.30E-111 | 0.696993297 | 0.449 | 0.029 | 1.91E-106 | 21 |
| ST6GALNAC3 | 1.84E-110 | 0.638826181 | 0.303 | 0.013 | 4.23E-106 | 21 |
| TJP1.2     | 4.25E-110 | 0.946938891 | 0.494 | 0.035 | 9.77E-106 | 21 |
| DLC1.1     | 1.27E-109 | 1.061047912 | 0.371 | 0.02  | 2.92E-105 | 21 |
| ATP8B1     | 3.01E-109 | 0.713011704 | 0.281 | 0.012 | 6.93E-105 | 21 |
| FXVD6.1    | 2.20E-108 | 1.007122037 | 0.393 | 0.023 | 5.05E-104 | 21 |
| LDLRAD3    | 3.14E-107 | 0.58805554  | 0.315 | 0.015 | 7.22E-103 | 21 |
| ASS1.2     | 3.87E-106 | 0.815556192 | 0.393 | 0.023 | 8.89E-102 | 21 |
| ITGA5.1    | 7.32E-106 | 1.067099078 | 0.663 | 0.066 | 1.68E-101 | 21 |
| EDN1.1     | 7.34E-106 | 1.119632022 | 0.404 | 0.025 | 1.69E-101 | 21 |
| BMPR2.2    | 1.16E-104 | 1.571481533 | 0.663 | 0.071 | 2.67E-100 | 21 |
| NFIA.4     | 2.01E-104 | 1.480924907 | 0.708 | 0.08  | 4.61E-100 | 21 |
| SPARCL1.5  | 2.24E-103 | 2.045515264 | 0.989 | 0.158 | 5.16E-99  | 21 |
| APP.7      | 4.33E-103 | 2.623263335 | 0.966 | 0.173 | 9.96E-99  | 21 |
| MPDZ.1     | 6.20E-103 | 0.605920307 | 0.326 | 0.016 | 1.42E-98  | 21 |
| PREX2.1    | 1.90E-102 | 0.73774059  | 0.371 | 0.021 | 4.37E-98  | 21 |
| PRSS23.3   | 2.56E-102 | 1.399369062 | 0.854 | 0.11  | 5.88E-98  | 21 |
| AKAP12.3   | 9.13E-102 | 1.610738827 | 0.517 | 0.043 | 2.10E-97  | 21 |
| HOXB7      | 9.14E-102 | 0.811418163 | 0.382 | 0.023 | 2.10E-97  | 21 |
| CNN3.6     | 1.70E-99  | 1.09052168  | 0.831 | 0.103 | 3.91E-95  | 21 |
| TEAD1      | 2.00E-99  | 0.723306586 | 0.315 | 0.016 | 4.59E-95  | 21 |
| CDC42BPA.2 | 2.32E-99  | 0.764283266 | 0.494 | 0.039 | 5.34E-95  | 21 |
| ECE1.2     | 4.59E-99  | 1.025439438 | 0.517 | 0.043 | 1.06E-94  | 21 |
| CLDN5.1    | 5.27E-99  | 1.380990307 | 0.494 | 0.039 | 1.21E-94  | 21 |
| TANC1.1    | 6.65E-98  | 0.684997457 | 0.36  | 0.021 | 1.53E-93  | 21 |
| TIMP3.3    | 1.51E-97  | 1.556405198 | 0.753 | 0.09  | 3.47E-93  | 21 |
| CEP112     | 5.78E-97  | 0.637441061 | 0.303 | 0.015 | 1.33E-92  | 21 |
| GOLM1.1    | 7.51E-97  | 0.737491581 | 0.393 | 0.026 | 1.73E-92  | 21 |
| APBB2.1    | 8.35E-96  | 0.697554349 | 0.326 | 0.018 | 1.92E-91  | 21 |
| SULF2      | 4.99E-95  | 0.948347614 | 0.539 | 0.049 | 1.15E-90  | 21 |
| FZD6       | 6.09E-95  | 0.564138894 | 0.315 | 0.017 | 1.40E-90  | 21 |
| PDLIM1.5   | 2.54E-94  | 1.697294642 | 0.82  | 0.116 | 5.83E-90  | 21 |
| RPS6KA2.1  | 6.37E-94  | 0.824926653 | 0.438 | 0.033 | 1.46E-89  | 21 |
| PTPRM.2    | 6.88E-94  | 0.918091244 | 0.494 | 0.042 | 1.58E-89  | 21 |

|            |          |             |       |       |          |    |
|------------|----------|-------------|-------|-------|----------|----|
| CLEC1A     | 1.05E-93 | 0.621332391 | 0.292 | 0.015 | 2.42E-89 | 21 |
| LHFP.2     | 6.34E-93 | 1.067030053 | 0.528 | 0.048 | 1.46E-88 | 21 |
| GNG11.4    | 6.81E-93 | 1.617064095 | 0.899 | 0.139 | 1.57E-88 | 21 |
| PECAM1.5   | 1.92E-92 | 2.372267803 | 0.966 | 0.196 | 4.41E-88 | 21 |
| EPB41L3.2  | 5.80E-91 | 1.206216165 | 0.562 | 0.059 | 1.33E-86 | 21 |
| TUBB6.1    | 8.18E-91 | 0.707307094 | 0.427 | 0.032 | 1.88E-86 | 21 |
| TSPAN9     | 9.99E-91 | 0.601604337 | 0.337 | 0.02  | 2.30E-86 | 21 |
| ACTN1.3    | 1.94E-89 | 1.322108006 | 0.652 | 0.078 | 4.45E-85 | 21 |
| CLU.6      | 2.70E-89 | 2.782170743 | 0.955 | 0.193 | 6.20E-85 | 21 |
| NCKAP1.2   | 6.57E-89 | 0.785650313 | 0.449 | 0.036 | 1.51E-84 | 21 |
| FSTL1.2    | 2.34E-88 | 0.707033036 | 0.528 | 0.048 | 5.39E-84 | 21 |
| HTRA1.4    | 2.89E-87 | 1.54241447  | 0.742 | 0.105 | 6.65E-83 | 21 |
| SPRY1.2    | 4.27E-86 | 1.793042822 | 0.764 | 0.107 | 9.81E-82 | 21 |
| ABLIM1.2   | 1.06E-85 | 1.184104049 | 0.607 | 0.067 | 2.43E-81 | 21 |
| LRRC32.2   | 1.50E-85 | 0.570330621 | 0.315 | 0.018 | 3.44E-81 | 21 |
| BCAM.2     | 5.35E-85 | 0.805888116 | 0.596 | 0.063 | 1.23E-80 | 21 |
| AFAP1      | 1.80E-84 | 0.524079119 | 0.337 | 0.021 | 4.14E-80 | 21 |
| CD59.9     | 2.74E-84 | 2.27127222  | 1     | 0.228 | 6.29E-80 | 21 |
| WBP5.5     | 3.18E-84 | 1.017904424 | 0.663 | 0.081 | 7.32E-80 | 21 |
| RPGR.1     | 7.66E-84 | 1.154476264 | 0.573 | 0.061 | 1.76E-79 | 21 |
| CDA.2      | 1.03E-83 | 0.709414355 | 0.427 | 0.034 | 2.37E-79 | 21 |
| TNS2.2     | 2.08E-83 | 0.702617788 | 0.461 | 0.04  | 4.77E-79 | 21 |
| EHD2.3     | 5.19E-83 | 0.783285556 | 0.494 | 0.047 | 1.19E-78 | 21 |
| CAV1.5     | 7.75E-83 | 1.449452246 | 0.865 | 0.133 | 1.78E-78 | 21 |
| COX7A1.2   | 1.05E-82 | 0.935421435 | 0.596 | 0.065 | 2.41E-78 | 21 |
| ITGA10     | 3.00E-81 | 0.5934708   | 0.281 | 0.016 | 6.90E-77 | 21 |
| PXDC1      | 5.68E-81 | 0.596432459 | 0.315 | 0.02  | 1.31E-76 | 21 |
| CALD1.5    | 6.42E-81 | 0.985644546 | 0.899 | 0.144 | 1.47E-76 | 21 |
| CD93.3     | 8.88E-81 | 1.157723587 | 0.64  | 0.082 | 2.04E-76 | 21 |
| ABCG2.1    | 1.22E-80 | 0.656822435 | 0.292 | 0.017 | 2.82E-76 | 21 |
| SH3BP5.1   | 3.63E-80 | 1.448652849 | 0.809 | 0.132 | 8.34E-76 | 21 |
| CRNDE.1    | 6.33E-80 | 0.533418258 | 0.371 | 0.027 | 1.46E-75 | 21 |
| ADIRF.14   | 1.17E-79 | 2.607512763 | 0.989 | 0.237 | 2.69E-75 | 21 |
| PLEKHG1.1  | 5.37E-79 | 0.712935755 | 0.303 | 0.019 | 1.23E-74 | 21 |
| MYOF.3     | 5.60E-79 | 0.805229275 | 0.494 | 0.05  | 1.29E-74 | 21 |
| IPO11.1    | 7.03E-79 | 0.768399833 | 0.427 | 0.037 | 1.62E-74 | 21 |
| MARCKS.3   | 8.93E-79 | 1.662464615 | 0.843 | 0.147 | 2.05E-74 | 21 |
| FAM213A.3  | 1.15E-78 | 1.368737666 | 0.73  | 0.109 | 2.65E-74 | 21 |
| RASA4      | 2.81E-78 | 0.934230732 | 0.449 | 0.042 | 6.45E-74 | 21 |
| ARHGAP29.3 | 3.45E-78 | 1.075913347 | 0.584 | 0.066 | 7.93E-74 | 21 |
| ELK3.1     | 5.41E-78 | 1.405230458 | 0.674 | 0.093 | 1.24E-73 | 21 |
| PLXNA2.1   | 9.23E-78 | 0.562845816 | 0.292 | 0.018 | 2.12E-73 | 21 |
| YBX3.5     | 2.38E-77 | 2.007487367 | 0.888 | 0.18  | 5.46E-73 | 21 |
| FERMT2.2   | 1.13E-76 | 0.692724224 | 0.404 | 0.034 | 2.59E-72 | 21 |
| PRCP.2     | 1.24E-76 | 1.3550858   | 0.742 | 0.119 | 2.84E-72 | 21 |
| SULF1.1    | 2.25E-76 | 0.894615572 | 0.315 | 0.021 | 5.17E-72 | 21 |
| CHSY1      | 2.66E-76 | 0.741498266 | 0.438 | 0.04  | 6.11E-72 | 21 |
| MSRB3.1    | 3.53E-76 | 0.54006788  | 0.292 | 0.018 | 8.10E-72 | 21 |
| COL4A1.2   | 1.12E-75 | 0.927386105 | 0.573 | 0.066 | 2.57E-71 | 21 |
| BACE2.1    | 1.06E-74 | 0.598910208 | 0.326 | 0.023 | 2.44E-70 | 21 |
| WWP1       | 1.88E-74 | 1.029945243 | 0.562 | 0.066 | 4.32E-70 | 21 |
| LAMB2.2    | 3.53E-74 | 0.924442847 | 0.438 | 0.041 | 8.12E-70 | 21 |
| RBMS2.1    | 7.78E-74 | 0.765422087 | 0.404 | 0.035 | 1.79E-69 | 21 |
| FKBP9.1    | 8.99E-74 | 0.599528436 | 0.36  | 0.028 | 2.07E-69 | 21 |
| CNRIP1     | 1.42E-73 | 0.55098978  | 0.315 | 0.022 | 3.25E-69 | 21 |
| SNTB2.1    | 3.19E-73 | 1.105739947 | 0.596 | 0.074 | 7.33E-69 | 21 |
| CAV2.4     | 1.13E-72 | 0.939584842 | 0.596 | 0.074 | 2.61E-68 | 21 |
| ST6GAL1.1  | 1.31E-72 | 1.234861506 | 0.596 | 0.079 | 3.02E-68 | 21 |

|            |          |             |       |       |          |    |
|------------|----------|-------------|-------|-------|----------|----|
| HS3ST1     | 1.92E-72 | 1.129683968 | 0.281 | 0.018 | 4.41E-68 | 21 |
| NREP.1     | 3.01E-72 | 0.650621021 | 0.348 | 0.027 | 6.92E-68 | 21 |
| LIMA1.3    | 3.17E-72 | 1.122088216 | 0.618 | 0.082 | 7.28E-68 | 21 |
| TMEM150C.1 | 5.33E-72 | 0.5938456   | 0.326 | 0.023 | 1.22E-67 | 21 |
| CTTN.3     | 7.15E-72 | 0.6598108   | 0.416 | 0.038 | 1.64E-67 | 21 |
| KIAA0355.1 | 1.99E-71 | 1.092359515 | 0.652 | 0.092 | 4.57E-67 | 21 |
| ARL4A.2    | 3.20E-71 | 1.858206248 | 0.854 | 0.172 | 7.34E-67 | 21 |
| S100A13.5  | 4.06E-71 | 1.222303938 | 0.775 | 0.129 | 9.32E-67 | 21 |
| NGFRAP1.5  | 4.87E-71 | 1.092196589 | 0.719 | 0.108 | 1.12E-66 | 21 |
| PHACTR2.3  | 2.51E-70 | 1.277359436 | 0.685 | 0.105 | 5.78E-66 | 21 |
| RBP1.1     | 2.79E-70 | 0.545937316 | 0.27  | 0.017 | 6.42E-66 | 21 |
| PMP22.2    | 3.69E-70 | 0.950578702 | 0.517 | 0.059 | 8.48E-66 | 21 |
| MRAS       | 4.25E-70 | 0.57941907  | 0.27  | 0.017 | 9.77E-66 | 21 |
| MET.2      | 4.40E-70 | 0.658993424 | 0.326 | 0.024 | 1.01E-65 | 21 |
| PKP4       | 7.39E-70 | 0.548023294 | 0.326 | 0.024 | 1.70E-65 | 21 |
| C16orf45.1 | 1.20E-69 | 0.617748734 | 0.281 | 0.018 | 2.75E-65 | 21 |
| LAMC1.2    | 3.08E-69 | 0.691013649 | 0.416 | 0.039 | 7.07E-65 | 21 |
| MDK.1      | 5.51E-69 | 0.704329436 | 0.315 | 0.023 | 1.27E-64 | 21 |
| INPP1.1    | 1.63E-68 | 0.870433773 | 0.494 | 0.056 | 3.75E-64 | 21 |
| RAPH1.1    | 1.73E-68 | 0.680622886 | 0.382 | 0.034 | 3.98E-64 | 21 |
| MKL2       | 5.45E-68 | 0.717658312 | 0.348 | 0.028 | 1.25E-63 | 21 |
| PDLIM3.1   | 5.99E-68 | 0.581262168 | 0.27  | 0.017 | 1.38E-63 | 21 |
| CYR61.3    | 1.47E-67 | 2.299334832 | 0.427 | 0.044 | 3.38E-63 | 21 |
| PLPP1.2    | 3.26E-67 | 0.731948817 | 0.663 | 0.094 | 7.49E-63 | 21 |
| PLS3.2     | 5.67E-67 | 0.510813254 | 0.382 | 0.034 | 1.30E-62 | 21 |
| PVRL2.1    | 1.08E-66 | 0.806096906 | 0.494 | 0.058 | 2.47E-62 | 21 |
| THBD.1     | 9.48E-66 | 0.975821151 | 0.393 | 0.038 | 2.18E-61 | 21 |
| SPARC.6    | 1.21E-65 | 0.757532814 | 0.91  | 0.178 | 2.79E-61 | 21 |
| TACC1.4    | 1.95E-65 | 1.607117276 | 0.921 | 0.225 | 4.49E-61 | 21 |
| PDLIM5.3   | 2.08E-65 | 1.164198539 | 0.573 | 0.08  | 4.78E-61 | 21 |
| KLF9.2     | 3.00E-65 | 1.454873938 | 0.809 | 0.157 | 6.90E-61 | 21 |
| CCDC50.5   | 1.25E-64 | 1.195282575 | 0.697 | 0.119 | 2.86E-60 | 21 |
| CDC42BPB.1 | 3.68E-64 | 0.794418174 | 0.337 | 0.029 | 8.46E-60 | 21 |
| AGRN       | 4.82E-64 | 0.608324325 | 0.326 | 0.027 | 1.11E-59 | 21 |
| FKBP1A.13  | 5.45E-64 | 2.797366332 | 0.989 | 0.409 | 1.25E-59 | 21 |
| C10orf128  | 8.56E-64 | 0.646757645 | 0.382 | 0.036 | 1.97E-59 | 21 |
| PIK3C2A.1  | 1.48E-63 | 1.107742924 | 0.596 | 0.088 | 3.40E-59 | 21 |
| HOXD8.1    | 4.61E-63 | 0.526846581 | 0.303 | 0.023 | 1.06E-58 | 21 |
| ALDH1A1.3  | 4.99E-63 | 0.979840308 | 0.607 | 0.087 | 1.15E-58 | 21 |
| IL6ST.2    | 2.26E-62 | 1.628701926 | 0.82  | 0.174 | 5.19E-58 | 21 |
| ID1.2      | 2.62E-62 | 1.05945141  | 0.528 | 0.067 | 6.03E-58 | 21 |
| ZFYVE21.1  | 4.75E-62 | 1.000247069 | 0.539 | 0.074 | 1.09E-57 | 21 |
| STAB1.1    | 9.30E-62 | 0.733550039 | 0.404 | 0.043 | 2.14E-57 | 21 |
| PLXND1.2   | 1.04E-61 | 0.768629201 | 0.494 | 0.061 | 2.38E-57 | 21 |
| ID3.4      | 3.41E-61 | 1.140640261 | 0.753 | 0.136 | 7.83E-57 | 21 |
| SHC1       | 4.91E-61 | 0.69421141  | 0.449 | 0.051 | 1.13E-56 | 21 |
| IFITM3.18  | 6.73E-60 | 2.301384114 | 1     | 0.374 | 1.55E-55 | 21 |
| AK1.1      | 8.67E-60 | 0.762755828 | 0.416 | 0.045 | 1.99E-55 | 21 |
| HHEX.1     | 1.08E-59 | 0.760587445 | 0.393 | 0.042 | 2.48E-55 | 21 |
| C4orf32.1  | 1.55E-59 | 0.506503211 | 0.371 | 0.036 | 3.56E-55 | 21 |
| NFE2L1.4   | 1.14E-58 | 0.901734009 | 0.551 | 0.08  | 2.61E-54 | 21 |
| GFOD2.1    | 1.82E-58 | 0.66145544  | 0.36  | 0.035 | 4.19E-54 | 21 |
| SYNPO.1    | 1.98E-58 | 0.528440594 | 0.303 | 0.025 | 4.54E-54 | 21 |
| TRIOBP.1   | 4.57E-58 | 0.93645508  | 0.483 | 0.063 | 1.05E-53 | 21 |
| PLVAP.2    | 4.94E-58 | 0.656425944 | 0.618 | 0.092 | 1.14E-53 | 21 |
| GJA1.1     | 5.78E-58 | 0.554802319 | 0.348 | 0.032 | 1.33E-53 | 21 |
| TNFAIP1.1  | 3.87E-57 | 0.579231252 | 0.36  | 0.035 | 8.90E-53 | 21 |
| PLK2.1     | 6.65E-57 | 0.870360728 | 0.461 | 0.057 | 1.53E-52 | 21 |

|                |          |             |       |       |          |    |
|----------------|----------|-------------|-------|-------|----------|----|
| PTMS.7         | 6.92E-57 | 1.537094442 | 0.899 | 0.238 | 1.59E-52 | 21 |
| HES1.4         | 1.00E-56 | 1.738190619 | 0.551 | 0.082 | 2.30E-52 | 21 |
| COL4A2.2       | 1.17E-56 | 0.585076325 | 0.483 | 0.06  | 2.69E-52 | 21 |
| IGFBP7.17      | 1.73E-56 | 2.179561173 | 1     | 0.375 | 3.98E-52 | 21 |
| GALNT15.1      | 3.98E-56 | 0.532913008 | 0.281 | 0.022 | 9.14E-52 | 21 |
| NEDD9.4        | 8.71E-56 | 1.149155494 | 0.798 | 0.165 | 2.00E-51 | 21 |
| ASAP1.2        | 1.83E-55 | 0.919422949 | 0.596 | 0.097 | 4.21E-51 | 21 |
| TNS1.3         | 5.28E-55 | 0.777776025 | 0.404 | 0.046 | 1.21E-50 | 21 |
| TGFBR2.2       | 7.76E-55 | 1.678318461 | 0.809 | 0.198 | 1.78E-50 | 21 |
| DUSP23.3       | 1.31E-54 | 1.203283154 | 0.775 | 0.17  | 3.00E-50 | 21 |
| CLIC2.1        | 1.33E-54 | 0.551421939 | 0.348 | 0.035 | 3.05E-50 | 21 |
| SSBP3          | 1.52E-54 | 0.560224212 | 0.315 | 0.029 | 3.49E-50 | 21 |
| ZBTB8A         | 2.09E-54 | 0.539521851 | 0.281 | 0.023 | 4.80E-50 | 21 |
| BGN.2          | 5.91E-54 | 1.063987315 | 0.472 | 0.063 | 1.36E-49 | 21 |
| MYO1C.3        | 2.73E-53 | 0.75448535  | 0.438 | 0.056 | 6.28E-49 | 21 |
| RFX3           | 5.40E-53 | 0.52260672  | 0.315 | 0.03  | 1.24E-48 | 21 |
| LMNA.4         | 6.03E-53 | 1.64043295  | 0.787 | 0.171 | 1.39E-48 | 21 |
| RALGAPA2       | 1.38E-52 | 0.743525949 | 0.382 | 0.043 | 3.17E-48 | 21 |
| PTK2.2         | 1.80E-52 | 0.609510148 | 0.371 | 0.041 | 4.13E-48 | 21 |
| RAB13.7        | 3.06E-52 | 1.041612153 | 0.685 | 0.133 | 7.04E-48 | 21 |
| MGP.5          | 3.56E-52 | 2.001811571 | 0.73  | 0.146 | 8.18E-48 | 21 |
| PTTG1IP.4      | 1.58E-51 | 1.098692835 | 0.775 | 0.173 | 3.62E-47 | 21 |
| ITPR2.1        | 8.07E-51 | 0.960904821 | 0.584 | 0.1   | 1.85E-46 | 21 |
| TM4SF18.1      | 9.25E-51 | 0.592750256 | 0.337 | 0.035 | 2.13E-46 | 21 |
| BTBD3.1        | 1.90E-50 | 0.558669799 | 0.292 | 0.027 | 4.37E-46 | 21 |
| DAAM1.1        | 1.92E-50 | 0.781890078 | 0.427 | 0.055 | 4.42E-46 | 21 |
| TCEAL4.6       | 8.20E-48 | 0.865750187 | 0.719 | 0.155 | 1.89E-43 | 21 |
| EPHX1.2        | 8.22E-48 | 0.705213632 | 0.348 | 0.04  | 1.89E-43 | 21 |
| EXOC6.1        | 9.88E-48 | 0.903582234 | 0.461 | 0.067 | 2.27E-43 | 21 |
| ITPRIP.1       | 1.01E-47 | 0.745151401 | 0.449 | 0.063 | 2.32E-43 | 21 |
| PIEZO1         | 3.97E-47 | 0.648548697 | 0.393 | 0.05  | 9.11E-43 | 21 |
| SERPINB6.3     | 5.18E-47 | 1.022372412 | 0.742 | 0.171 | 1.19E-42 | 21 |
| GSE1           | 6.29E-47 | 0.65675502  | 0.371 | 0.045 | 1.45E-42 | 21 |
| CTNND1.3       | 6.65E-47 | 0.666233107 | 0.517 | 0.085 | 1.53E-42 | 21 |
| STOM.2         | 9.62E-47 | 1.210239467 | 0.787 | 0.198 | 2.21E-42 | 21 |
| ASRGL1         | 1.79E-46 | 0.702232418 | 0.303 | 0.032 | 4.12E-42 | 21 |
| RP11-553L6.5.4 | 2.02E-46 | 0.676854265 | 0.393 | 0.05  | 4.64E-42 | 21 |
| NRP2.1         | 8.68E-46 | 0.566116453 | 0.315 | 0.034 | 1.99E-41 | 21 |
| TSPAN3.3       | 1.41E-45 | 0.759596265 | 0.562 | 0.1   | 3.23E-41 | 21 |
| TPM4.3         | 2.41E-45 | 1.406893023 | 0.787 | 0.21  | 5.54E-41 | 21 |
| TSPAN4.4       | 3.41E-45 | 0.816893611 | 0.551 | 0.098 | 7.84E-41 | 21 |
| MCAM.2         | 4.10E-45 | 0.730393699 | 0.393 | 0.05  | 9.42E-41 | 21 |
| ACACB.1        | 1.84E-44 | 0.523645254 | 0.27  | 0.026 | 4.22E-40 | 21 |
| ANXA2.14       | 4.32E-44 | 1.49709925  | 0.978 | 0.389 | 9.92E-40 | 21 |
| MEF2C.4        | 5.07E-44 | 0.967272981 | 0.697 | 0.147 | 1.16E-39 | 21 |
| S100A6.11      | 1.02E-43 | 1.940550419 | 1     | 0.765 | 2.35E-39 | 21 |
| DKK3.2         | 1.19E-43 | 0.698386621 | 0.382 | 0.049 | 2.74E-39 | 21 |
| PPM1F.1        | 1.72E-43 | 0.534756322 | 0.337 | 0.04  | 3.95E-39 | 21 |
| SWAP70.3       | 2.76E-43 | 0.989637549 | 0.551 | 0.104 | 6.34E-39 | 21 |
| DSTN.17        | 3.31E-43 | 1.164627425 | 0.933 | 0.303 | 7.60E-39 | 21 |
| MLLT4.1        | 3.32E-43 | 0.509402701 | 0.292 | 0.031 | 7.64E-39 | 21 |
| ARHGAP31       | 3.90E-43 | 0.501962666 | 0.258 | 0.025 | 8.96E-39 | 21 |
| C1orf21        | 4.03E-43 | 0.707438762 | 0.416 | 0.059 | 9.26E-39 | 21 |
| EVA1C.1        | 1.34E-42 | 0.532916239 | 0.315 | 0.036 | 3.07E-38 | 21 |
| JAG1.2         | 1.83E-42 | 0.572129692 | 0.36  | 0.046 | 4.20E-38 | 21 |
| CD151.6        | 1.83E-42 | 0.95847256  | 0.775 | 0.197 | 4.20E-38 | 21 |
| TMEM47.3       | 2.04E-42 | 0.580179035 | 0.348 | 0.043 | 4.69E-38 | 21 |
| IRF2BP2.4      | 3.71E-42 | 0.996291984 | 0.674 | 0.155 | 8.53E-38 | 21 |

|              |          |             |       |       |          |    |
|--------------|----------|-------------|-------|-------|----------|----|
| GNAQ.4       | 4.22E-42 | 0.910588925 | 0.629 | 0.133 | 9.69E-38 | 21 |
| SPTAN1.2     | 8.13E-42 | 0.95122828  | 0.584 | 0.113 | 1.87E-37 | 21 |
| MGST2.4      | 8.19E-42 | 0.859470712 | 0.697 | 0.162 | 1.88E-37 | 21 |
| SUN1.1       | 9.28E-42 | 0.787904697 | 0.393 | 0.056 | 2.13E-37 | 21 |
| SSFA2        | 1.59E-41 | 0.718712824 | 0.438 | 0.07  | 3.66E-37 | 21 |
| DOCK4.2      | 2.82E-41 | 0.80325613  | 0.438 | 0.07  | 6.48E-37 | 21 |
| NDRG1.3      | 2.87E-41 | 0.921054176 | 0.652 | 0.14  | 6.59E-37 | 21 |
| LRRC16A      | 5.61E-41 | 0.507804158 | 0.292 | 0.033 | 1.29E-36 | 21 |
| LEPROT.5     | 9.75E-41 | 1.009652752 | 0.753 | 0.194 | 2.24E-36 | 21 |
| PRKCDBP.5    | 1.23E-40 | 0.535762611 | 0.483 | 0.081 | 2.82E-36 | 21 |
| SLC40A1.2    | 1.29E-40 | 0.631928749 | 0.461 | 0.076 | 2.97E-36 | 21 |
| HSD17B12.3   | 2.03E-40 | 0.886101042 | 0.551 | 0.11  | 4.66E-36 | 21 |
| CCDC85B.8    | 3.13E-40 | 1.221455257 | 0.82  | 0.25  | 7.18E-36 | 21 |
| TMCC3.2      | 4.43E-40 | 0.77365285  | 0.371 | 0.053 | 1.02E-35 | 21 |
| PINK1.1      | 7.80E-40 | 0.544363211 | 0.393 | 0.057 | 1.79E-35 | 21 |
| TMEM30A.2    | 8.43E-40 | 0.880026527 | 0.64  | 0.142 | 1.94E-35 | 21 |
| SLC44A2.1    | 1.08E-39 | 0.921505392 | 0.506 | 0.091 | 2.48E-35 | 21 |
| ARHGEF12.3   | 1.48E-39 | 0.596782196 | 0.461 | 0.075 | 3.40E-35 | 21 |
| MAPK3.1      | 2.54E-39 | 0.519751043 | 0.382 | 0.055 | 5.84E-35 | 21 |
| GNG12.3      | 2.82E-39 | 0.5531686   | 0.258 | 0.027 | 6.48E-35 | 21 |
| ASPH.5       | 4.04E-39 | 0.8260548   | 0.517 | 0.099 | 9.29E-35 | 21 |
| AHR.2        | 4.05E-39 | 0.813799374 | 0.461 | 0.08  | 9.32E-35 | 21 |
| SEC14L1.3    | 5.57E-39 | 1.161619358 | 0.708 | 0.185 | 1.28E-34 | 21 |
| ATP11C       | 5.70E-39 | 0.604869907 | 0.303 | 0.037 | 1.31E-34 | 21 |
| GALNT1.1     | 6.70E-39 | 0.719742964 | 0.483 | 0.086 | 1.54E-34 | 21 |
| PARVB.1      | 7.77E-39 | 0.646470123 | 0.449 | 0.076 | 1.79E-34 | 21 |
| SLC38A2.5    | 7.98E-39 | 1.155980053 | 0.764 | 0.205 | 1.83E-34 | 21 |
| RCN1.4       | 8.55E-39 | 0.67274568  | 0.494 | 0.09  | 1.96E-34 | 21 |
| HDAC7.1      | 1.23E-38 | 0.636803107 | 0.472 | 0.079 | 2.82E-34 | 21 |
| DUSP6.2      | 3.09E-38 | 1.051692367 | 0.562 | 0.115 | 7.10E-34 | 21 |
| TIMP1.18     | 3.12E-38 | 1.108055577 | 0.944 | 0.31  | 7.17E-34 | 21 |
| ARL2.3       | 4.31E-38 | 0.896254382 | 0.629 | 0.146 | 9.91E-34 | 21 |
| PSMB5.3      | 1.10E-37 | 0.686889993 | 0.652 | 0.151 | 2.53E-33 | 21 |
| ARPC1A.4     | 1.27E-37 | 0.702421877 | 0.607 | 0.132 | 2.93E-33 | 21 |
| CSGALNACT1.1 | 2.35E-37 | 0.529584005 | 0.36  | 0.051 | 5.39E-33 | 21 |
| NOC3L        | 2.60E-37 | 0.706534504 | 0.382 | 0.058 | 5.97E-33 | 21 |
| EBPL.1       | 2.73E-37 | 0.708436909 | 0.494 | 0.093 | 6.27E-33 | 21 |
| MTRNR2L1     | 4.47E-37 | 0.590343821 | 0.27  | 0.031 | 1.03E-32 | 21 |
| EHD4.1       | 4.52E-37 | 0.84595497  | 0.438 | 0.075 | 1.04E-32 | 21 |
| WARS.2       | 5.77E-37 | 1.072626613 | 0.472 | 0.088 | 1.33E-32 | 21 |
| PLEC.1       | 8.33E-37 | 0.734158522 | 0.449 | 0.08  | 1.91E-32 | 21 |
| ABL2.3       | 1.02E-36 | 0.677564628 | 0.416 | 0.07  | 2.34E-32 | 21 |
| FNIP2.4      | 1.41E-36 | 0.734999172 | 0.427 | 0.074 | 3.24E-32 | 21 |
| ZMAT3.1      | 2.67E-36 | 0.960299343 | 0.416 | 0.07  | 6.13E-32 | 21 |
| CLIC4.5      | 3.54E-36 | 0.509759074 | 0.483 | 0.09  | 8.14E-32 | 21 |
| PXN.1        | 1.11E-35 | 0.677476206 | 0.438 | 0.076 | 2.55E-31 | 21 |
| COL18A1.2    | 1.24E-35 | 0.57091923  | 0.416 | 0.069 | 2.85E-31 | 21 |
| NCOA7.1      | 1.57E-35 | 0.886273827 | 0.584 | 0.13  | 3.61E-31 | 21 |
| VGLL4.1      | 1.71E-35 | 0.548422662 | 0.438 | 0.075 | 3.93E-31 | 21 |
| LTC4S.2      | 2.38E-35 | 0.804919198 | 0.438 | 0.079 | 5.47E-31 | 21 |
| IFITM2.12    | 2.94E-35 | 1.244592829 | 0.966 | 0.472 | 6.76E-31 | 21 |
| CD320.2      | 3.65E-35 | 0.725960281 | 0.506 | 0.096 | 8.38E-31 | 21 |
| FCHO2.2      | 4.21E-35 | 0.623077143 | 0.404 | 0.068 | 9.68E-31 | 21 |
| PERP.2       | 4.72E-35 | 0.720570681 | 0.416 | 0.069 | 1.09E-30 | 21 |
| RAB11A.5     | 5.01E-35 | 1.141852808 | 0.753 | 0.225 | 1.15E-30 | 21 |
| CHMP3.2      | 1.03E-34 | 0.84193019  | 0.685 | 0.177 | 2.36E-30 | 21 |
| ZEB1.2       | 2.29E-34 | 0.681408882 | 0.472 | 0.087 | 5.27E-30 | 21 |
| UGCG.1       | 3.96E-34 | 0.744179341 | 0.438 | 0.081 | 9.11E-30 | 21 |

|             |          |             |       |       |          |    |
|-------------|----------|-------------|-------|-------|----------|----|
| C1orf54.4   | 4.10E-34 | 0.720234506 | 0.449 | 0.085 | 9.41E-30 | 21 |
| NAA10.1     | 4.58E-34 | 0.826288149 | 0.708 | 0.188 | 1.05E-29 | 21 |
| NFIC.4      | 4.61E-34 | 0.706957413 | 0.539 | 0.117 | 1.06E-29 | 21 |
| FAM43A.1    | 5.34E-34 | 0.61025338  | 0.315 | 0.043 | 1.23E-29 | 21 |
| GIMAP6.1    | 6.63E-34 | 0.674469187 | 0.506 | 0.1   | 1.52E-29 | 21 |
| TRIB2.1     | 8.03E-34 | 0.509801658 | 0.315 | 0.043 | 1.85E-29 | 21 |
| MKNK2       | 1.24E-33 | 0.693515544 | 0.438 | 0.081 | 2.84E-29 | 21 |
| GSN.7       | 2.44E-33 | 0.674218671 | 0.787 | 0.221 | 5.61E-29 | 21 |
| ATL3        | 3.12E-33 | 0.589577241 | 0.449 | 0.085 | 7.17E-29 | 21 |
| SLK.1       | 6.59E-33 | 0.682722829 | 0.438 | 0.082 | 1.52E-28 | 21 |
| GNAI2.15    | 8.58E-33 | 1.133746355 | 0.787 | 0.257 | 1.97E-28 | 21 |
| AKT3.1      | 9.38E-33 | 0.546397019 | 0.371 | 0.06  | 2.15E-28 | 21 |
| DPYSL2.4    | 1.55E-32 | 0.931812273 | 0.562 | 0.137 | 3.56E-28 | 21 |
| ATP11A.2    | 4.82E-32 | 0.582256252 | 0.348 | 0.056 | 1.11E-27 | 21 |
| FOXO1       | 9.35E-32 | 0.574513598 | 0.348 | 0.055 | 2.15E-27 | 21 |
| RASAL2.3    | 9.66E-32 | 0.5976906   | 0.348 | 0.057 | 2.22E-27 | 21 |
| UBE2H       | 1.18E-31 | 0.713606108 | 0.438 | 0.084 | 2.71E-27 | 21 |
| NFAT5.3     | 1.44E-31 | 0.752986571 | 0.539 | 0.12  | 3.31E-27 | 21 |
| TPST2       | 1.52E-31 | 0.795775833 | 0.472 | 0.097 | 3.50E-27 | 21 |
| TNFSF10.5   | 1.94E-31 | 0.856547383 | 0.64  | 0.164 | 4.47E-27 | 21 |
| KLF2.4      | 1.98E-31 | 1.312863097 | 0.708 | 0.206 | 4.55E-27 | 21 |
| SERPINE1.2  | 2.37E-31 | 0.759091632 | 0.326 | 0.05  | 5.44E-27 | 21 |
| VAT1.1      | 2.41E-31 | 0.605158198 | 0.337 | 0.054 | 5.54E-27 | 21 |
| ADD1.3      | 2.46E-31 | 0.675897446 | 0.596 | 0.142 | 5.64E-27 | 21 |
| HEBP1.1     | 3.21E-31 | 0.684263965 | 0.472 | 0.1   | 7.38E-27 | 21 |
| GUK1.6      | 4.01E-31 | 1.236459555 | 0.944 | 0.504 | 9.21E-27 | 21 |
| S100A10.12  | 4.62E-31 | 1.267456864 | 1     | 0.608 | 1.06E-26 | 21 |
| SEPW1.15    | 5.08E-31 | 0.992053672 | 0.899 | 0.356 | 1.17E-26 | 21 |
| TCEAL3.2    | 1.82E-30 | 0.548813516 | 0.393 | 0.072 | 4.17E-26 | 21 |
| TIMP2.5     | 2.44E-30 | 0.774854204 | 0.404 | 0.079 | 5.61E-26 | 21 |
| DNAJC10.1   | 2.78E-30 | 0.546557068 | 0.472 | 0.097 | 6.40E-26 | 21 |
| HSPB1.18    | 5.26E-30 | 1.046448087 | 0.955 | 0.431 | 1.21E-25 | 21 |
| PON2.2      | 5.92E-30 | 0.714920525 | 0.449 | 0.094 | 1.36E-25 | 21 |
| IFI44L.2    | 6.18E-30 | 0.744883351 | 0.393 | 0.073 | 1.42E-25 | 21 |
| METTL7A.4   | 1.24E-29 | 0.723167021 | 0.494 | 0.111 | 2.85E-25 | 21 |
| CTTNBP2NL.3 | 2.45E-29 | 0.734076318 | 0.438 | 0.092 | 5.63E-25 | 21 |
| DYNC1LI2.3  | 3.75E-29 | 0.63209532  | 0.517 | 0.117 | 8.62E-25 | 21 |
| RDX.4       | 4.45E-29 | 0.672170713 | 0.629 | 0.169 | 1.02E-24 | 21 |
| MAN1A1.1    | 5.30E-29 | 0.785541264 | 0.337 | 0.059 | 1.22E-24 | 21 |
| SELM.6      | 6.97E-29 | 0.773573777 | 0.652 | 0.181 | 1.60E-24 | 21 |
| DST.4       | 7.24E-29 | 0.581027941 | 0.404 | 0.08  | 1.66E-24 | 21 |
| VIM.16      | 1.26E-28 | 1.051929133 | 1     | 0.77  | 2.89E-24 | 21 |
| FILIP1.2    | 1.34E-28 | 0.506999768 | 0.27  | 0.037 | 3.08E-24 | 21 |
| AFF1.2      | 2.04E-28 | 0.672254325 | 0.472 | 0.105 | 4.70E-24 | 21 |
| MYL12B.6    | 2.09E-28 | 1.044639965 | 0.978 | 0.632 | 4.80E-24 | 21 |
| ICAM2.1     | 2.37E-28 | 0.595661762 | 0.483 | 0.106 | 5.44E-24 | 21 |
| BST2.12     | 2.72E-28 | 1.183930853 | 0.854 | 0.358 | 6.25E-24 | 21 |
| GIMAP7.18   | 3.98E-28 | 1.070031196 | 0.831 | 0.281 | 9.14E-24 | 21 |
| AHNAK.9     | 7.64E-28 | 0.937211654 | 0.809 | 0.291 | 1.76E-23 | 21 |
| IKBIP.2     | 9.57E-28 | 0.516292459 | 0.483 | 0.11  | 2.20E-23 | 21 |
| KLF7.2      | 1.11E-26 | 0.614358693 | 0.416 | 0.089 | 2.56E-22 | 21 |
| FEZ2.2      | 1.77E-26 | 0.630422268 | 0.539 | 0.137 | 4.06E-22 | 21 |
| YWHAE.13    | 2.66E-26 | 0.734663429 | 0.843 | 0.309 | 6.10E-22 | 21 |
| ENTPD1.4    | 2.70E-26 | 0.776452968 | 0.562 | 0.151 | 6.20E-22 | 21 |
| MT-CYB.15   | 3.29E-26 | 0.923672851 | 0.978 | 0.803 | 7.55E-22 | 21 |
| PEA15.3     | 3.39E-26 | 0.66678071  | 0.461 | 0.109 | 7.79E-22 | 21 |
| NAA38.10    | 3.49E-26 | 0.718211833 | 0.809 | 0.283 | 8.03E-22 | 21 |
| SRP14.8     | 4.54E-26 | 0.980495359 | 1     | 0.714 | 1.04E-21 | 21 |

|             |          |              |       |       |          |    |
|-------------|----------|--------------|-------|-------|----------|----|
| CTNNA1.4    | 4.85E-26 | 0.615768829  | 0.517 | 0.132 | 1.11E-21 | 21 |
| C4orf48.3   | 5.40E-26 | 0.836665411  | 0.64  | 0.195 | 1.24E-21 | 21 |
| GINM1.1     | 7.45E-26 | 0.578383947  | 0.517 | 0.13  | 1.71E-21 | 21 |
| TNFRSF1A.4  | 1.27E-25 | 0.623739124  | 0.539 | 0.146 | 2.92E-21 | 21 |
| FRMD4B.1    | 1.79E-25 | 0.774396127  | 0.528 | 0.139 | 4.11E-21 | 21 |
| CTNNB1.2    | 1.80E-25 | 0.85539436   | 0.652 | 0.201 | 4.13E-21 | 21 |
| CDC37.7     | 2.14E-25 | 0.773905936  | 0.82  | 0.305 | 4.92E-21 | 21 |
| RRBP1.4     | 2.29E-25 | 0.75707421   | 0.551 | 0.152 | 5.26E-21 | 21 |
| VAMP3.4     | 2.29E-25 | 0.705857569  | 0.506 | 0.129 | 5.27E-21 | 21 |
| KLF4.3      | 2.30E-25 | 0.799579899  | 0.483 | 0.118 | 5.28E-21 | 21 |
| FNDC3B.3    | 2.36E-25 | 0.558996816  | 0.438 | 0.099 | 5.43E-21 | 21 |
| SNRK.1      | 2.42E-25 | 0.730777532  | 0.472 | 0.111 | 5.56E-21 | 21 |
| TMEM205.2   | 2.55E-25 | 0.512552295  | 0.573 | 0.151 | 5.86E-21 | 21 |
| CALU.2      | 3.08E-25 | 0.615623469  | 0.438 | 0.101 | 7.07E-21 | 21 |
| QKI.4       | 3.16E-25 | 0.555662376  | 0.472 | 0.115 | 7.26E-21 | 21 |
| NTAN1       | 3.43E-25 | 0.524571974  | 0.382 | 0.079 | 7.88E-21 | 21 |
| RHOC.13     | 3.73E-25 | 0.841447467  | 0.854 | 0.32  | 8.58E-21 | 21 |
| BTBD7       | 1.54E-24 | 0.627546013  | 0.36  | 0.074 | 3.54E-20 | 21 |
| NKTR.14     | 1.90E-24 | 0.954390069  | 0.854 | 0.343 | 4.38E-20 | 21 |
| CSRP1.1     | 2.88E-24 | 0.556688057  | 0.438 | 0.102 | 6.61E-20 | 21 |
| FOXP1.11    | 3.62E-24 | 0.762528513  | 0.742 | 0.254 | 8.31E-20 | 21 |
| MBNL2.3     | 3.93E-24 | 0.595284359  | 0.404 | 0.09  | 9.02E-20 | 21 |
| KTN1.12     | 4.25E-24 | 0.888597674  | 0.876 | 0.38  | 9.77E-20 | 21 |
| RPS27L.13   | 4.66E-24 | 0.882671973  | 0.933 | 0.47  | 1.07E-19 | 21 |
| NUCB2.3     | 1.43E-23 | 0.633602298  | 0.596 | 0.169 | 3.28E-19 | 21 |
| LINC00657.3 | 1.77E-23 | 0.59947858   | 0.562 | 0.158 | 4.08E-19 | 21 |
| RRM2B.1     | 1.81E-23 | 0.529747024  | 0.27  | 0.046 | 4.15E-19 | 21 |
| GLS.1       | 1.84E-23 | 0.6592387    | 0.494 | 0.129 | 4.23E-19 | 21 |
| ZKSCAN1.3   | 2.45E-23 | 0.506784102  | 0.494 | 0.127 | 5.64E-19 | 21 |
| FAM3C.5     | 2.63E-23 | 0.572771041  | 0.551 | 0.151 | 6.04E-19 | 21 |
| RPS27.14    | 2.82E-23 | -1.063705971 | 1     | 0.975 | 6.49E-19 | 21 |
| MACF1.12    | 3.28E-23 | 0.962874571  | 0.708 | 0.254 | 7.53E-19 | 21 |
| CHD9.4      | 8.10E-23 | 0.647098112  | 0.64  | 0.201 | 1.86E-18 | 21 |
| ETS2.4      | 9.45E-23 | 0.640666289  | 0.449 | 0.116 | 2.17E-18 | 21 |
| MED13L.2    | 1.63E-22 | 0.585891184  | 0.416 | 0.1   | 3.74E-18 | 21 |
| CXCR4.15    | 1.82E-22 | -2.914770789 | 0.551 | 0.776 | 4.19E-18 | 21 |
| MYH9.15     | 2.27E-22 | 0.760719073  | 0.787 | 0.308 | 5.21E-18 | 21 |
| VCAM1.4     | 2.67E-22 | 1.550194679  | 0.404 | 0.095 | 6.14E-18 | 21 |
| NDUFA8.1    | 3.30E-22 | 0.627267029  | 0.506 | 0.143 | 7.59E-18 | 21 |
| CAPNS1.2    | 4.18E-22 | 0.683848885  | 0.539 | 0.161 | 9.61E-18 | 21 |
| FLI1.1      | 5.24E-22 | 0.610612558  | 0.494 | 0.132 | 1.20E-17 | 21 |
| HERC2.2     | 7.06E-22 | 0.658156781  | 0.483 | 0.129 | 1.62E-17 | 21 |
| VAMP5.13    | 7.23E-22 | 0.776313015  | 0.775 | 0.305 | 1.66E-17 | 21 |
| CARHSP1.6   | 7.51E-22 | 0.695025432  | 0.64  | 0.203 | 1.73E-17 | 21 |
| ZBTB20.5    | 9.84E-22 | 0.582681884  | 0.539 | 0.151 | 2.26E-17 | 21 |
| MGST3.15    | 1.13E-21 | 0.588039787  | 0.809 | 0.303 | 2.59E-17 | 21 |
| SERINC3.2   | 1.15E-21 | 0.610645613  | 0.596 | 0.183 | 2.64E-17 | 21 |
| CYBA.14     | 1.41E-21 | -2.474113858 | 0.303 | 0.689 | 3.23E-17 | 21 |
| XAF1.1      | 1.44E-21 | 0.600823026  | 0.449 | 0.115 | 3.32E-17 | 21 |
| CD63.16     | 1.92E-21 | 0.76652742   | 0.978 | 0.517 | 4.40E-17 | 21 |
| CD55.2      | 2.52E-21 | 0.77042509   | 0.573 | 0.178 | 5.79E-17 | 21 |
| APLP2.17    | 2.56E-21 | 0.586908999  | 0.719 | 0.253 | 5.89E-17 | 21 |
| TMOD3.1     | 2.66E-21 | 0.710733426  | 0.551 | 0.169 | 6.10E-17 | 21 |
| TANC2.2     | 2.86E-21 | 0.503557553  | 0.326 | 0.068 | 6.58E-17 | 21 |
| PLSCR1.6    | 3.17E-21 | 0.56655324   | 0.539 | 0.159 | 7.27E-17 | 21 |
| EID1.7      | 3.79E-21 | 0.839643383  | 0.888 | 0.425 | 8.70E-17 | 21 |
| DYNC1I2.8   | 6.30E-21 | 0.633602922  | 0.674 | 0.241 | 1.45E-16 | 21 |
| MTRNR2L8.4  | 7.32E-21 | 1.152688324  | 0.618 | 0.223 | 1.68E-16 | 21 |

|            |          |              |       |       |          |    |
|------------|----------|--------------|-------|-------|----------|----|
| CLTA.13    | 7.80E-21 | 0.628930991  | 0.764 | 0.288 | 1.79E-16 | 21 |
| ITGB1.12   | 9.09E-21 | 0.830143181  | 0.921 | 0.461 | 2.09E-16 | 21 |
| SERINC1.1  | 1.20E-20 | 0.679004475  | 0.64  | 0.215 | 2.76E-16 | 21 |
| PRDX2.13   | 1.21E-20 | 0.515040085  | 0.742 | 0.262 | 2.77E-16 | 21 |
| HIF1A.5    | 2.50E-20 | 0.770615768  | 0.562 | 0.18  | 5.75E-16 | 21 |
| PIM3.2     | 4.18E-20 | 0.55548039   | 0.438 | 0.115 | 9.61E-16 | 21 |
| UTRN.5     | 4.33E-20 | 0.712097839  | 0.652 | 0.228 | 9.96E-16 | 21 |
| VPS13A.1   | 4.73E-20 | 0.500100994  | 0.382 | 0.089 | 1.09E-15 | 21 |
| CRTAP.3    | 5.59E-20 | 0.572702624  | 0.483 | 0.14  | 1.28E-15 | 21 |
| PTPRC.18   | 5.74E-20 | -2.531643407 | 0.157 | 0.619 | 1.32E-15 | 21 |
| FILIP1L.3  | 7.35E-20 | 0.660552792  | 0.337 | 0.077 | 1.69E-15 | 21 |
| GIMAP4.15  | 1.12E-19 | 0.67265261   | 0.831 | 0.335 | 2.57E-15 | 21 |
| LAPTM4A.14 | 1.13E-19 | 0.580304558  | 0.843 | 0.349 | 2.59E-15 | 21 |
| RAC1.12    | 1.14E-19 | 0.704575607  | 0.921 | 0.445 | 2.61E-15 | 21 |
| GBP4.2     | 1.30E-19 | 0.935785388  | 0.483 | 0.144 | 2.99E-15 | 21 |
| ATOX1.5    | 1.32E-19 | 0.525102264  | 0.64  | 0.222 | 3.02E-15 | 21 |
| IFITM1.4   | 2.28E-19 | 0.689573821  | 0.573 | 0.179 | 5.24E-15 | 21 |
| POLR2L.8   | 3.11E-19 | 0.778493634  | 0.876 | 0.434 | 7.15E-15 | 21 |
| CDC42EP3.1 | 3.44E-19 | 0.508766429  | 0.461 | 0.125 | 7.91E-15 | 21 |
| HSP90B1.8  | 3.65E-19 | 0.708191974  | 0.865 | 0.403 | 8.38E-15 | 21 |
| CCPG1.2    | 3.75E-19 | 0.509429014  | 0.528 | 0.161 | 8.61E-15 | 21 |
| C5orf24.2  | 5.12E-19 | 0.522910071  | 0.427 | 0.116 | 1.18E-14 | 21 |
| APOL1.1    | 5.16E-19 | 0.544478112  | 0.326 | 0.074 | 1.19E-14 | 21 |
| LPP.3      | 5.21E-19 | 0.583705155  | 0.528 | 0.164 | 1.20E-14 | 21 |
| ENY2.7     | 7.23E-19 | 0.54126693   | 0.764 | 0.301 | 1.66E-14 | 21 |
| TNRC6A.1   | 7.36E-19 | 0.532547936  | 0.427 | 0.115 | 1.69E-14 | 21 |
| LGALS9.3   | 7.77E-19 | 0.546655821  | 0.427 | 0.118 | 1.79E-14 | 21 |
| SH3GLB1.7  | 8.40E-19 | 0.586414642  | 0.697 | 0.265 | 1.93E-14 | 21 |
| NDUFC2.9   | 8.43E-19 | 0.547579757  | 0.764 | 0.292 | 1.94E-14 | 21 |
| MT-ND6.4   | 9.19E-19 | 0.643476085  | 0.596 | 0.198 | 2.11E-14 | 21 |
| RTN4.15    | 9.37E-19 | 0.588225516  | 0.843 | 0.347 | 2.15E-14 | 21 |
| MCFD2.4    | 1.02E-18 | 0.53864643   | 0.371 | 0.094 | 2.35E-14 | 21 |
| LIMS1.13   | 1.08E-18 | 0.703038602  | 0.674 | 0.246 | 2.47E-14 | 21 |
| NUCB1.3    | 1.19E-18 | 0.536933732  | 0.652 | 0.236 | 2.74E-14 | 21 |
| SNHG7.1    | 1.41E-18 | 0.643062155  | 0.551 | 0.182 | 3.25E-14 | 21 |
| ITM2B.13   | 1.57E-18 | 0.906601178  | 0.989 | 0.778 | 3.60E-14 | 21 |
| BRI3.4     | 1.61E-18 | 0.649391021  | 0.506 | 0.16  | 3.70E-14 | 21 |
| PCMTD1.2   | 2.02E-18 | 0.594239407  | 0.539 | 0.174 | 4.63E-14 | 21 |
| ATP1A1.10  | 2.82E-18 | 0.608940301  | 0.685 | 0.26  | 6.49E-14 | 21 |
| TAGLN2.13  | 2.89E-18 | 0.691761468  | 0.787 | 0.354 | 6.63E-14 | 21 |
| MT-ND1.12  | 4.60E-18 | 0.76372566   | 0.978 | 0.786 | 1.06E-13 | 21 |
| CD81.4     | 5.14E-18 | 0.614670523  | 0.506 | 0.16  | 1.18E-13 | 21 |
| RNF115.5   | 6.11E-18 | 0.525910877  | 0.629 | 0.218 | 1.40E-13 | 21 |
| IL13RA1.3  | 8.26E-18 | 0.554685776  | 0.404 | 0.112 | 1.90E-13 | 21 |
| RGS1.20    | 8.52E-18 | -3.343216295 | 0.483 | 0.698 | 1.96E-13 | 21 |
| LAP3.3     | 1.06E-17 | 0.668212016  | 0.483 | 0.154 | 2.44E-13 | 21 |
| SOCS3.4    | 1.15E-17 | 0.697012398  | 0.506 | 0.159 | 2.65E-13 | 21 |
| TRIM56.4   | 1.29E-17 | 0.565823484  | 0.562 | 0.188 | 2.97E-13 | 21 |
| CNIH1.2    | 1.80E-17 | 0.510968555  | 0.528 | 0.174 | 4.14E-13 | 21 |
| SCARB2.4   | 2.51E-17 | 0.55295793   | 0.371 | 0.101 | 5.76E-13 | 21 |
| PRDX1.12   | 4.11E-17 | 0.573832403  | 0.865 | 0.401 | 9.44E-13 | 21 |
| SEC62.13   | 5.99E-17 | 0.548013536  | 0.876 | 0.422 | 1.38E-12 | 21 |
| BNIP2.2    | 6.45E-17 | 0.50236967   | 0.539 | 0.181 | 1.48E-12 | 21 |
| SPAG9.3    | 1.27E-16 | 0.501355632  | 0.461 | 0.143 | 2.93E-12 | 21 |
| DYNLL1.11  | 1.37E-16 | 0.655770104  | 0.831 | 0.406 | 3.15E-12 | 21 |
| ACLY.1     | 1.42E-16 | 0.521627747  | 0.315 | 0.077 | 3.26E-12 | 21 |
| HCST.16    | 2.59E-16 | -2.217063685 | 0.124 | 0.547 | 5.96E-12 | 21 |
| MYL12A.10  | 2.82E-16 | 0.808518837  | 0.966 | 0.688 | 6.48E-12 | 21 |



|                 |          |              |       |       |             |    |
|-----------------|----------|--------------|-------|-------|-------------|----|
| TM9SF3.1        | 2.86E-16 | 0.523311586  | 0.416 | 0.125 | 6.57E-12    | 21 |
| JMJD1C.9        | 4.34E-16 | 0.952350384  | 0.64  | 0.256 | 9.98E-12    | 21 |
| FIS1.6          | 4.68E-16 | 0.662397574  | 0.697 | 0.306 | 1.08E-11    | 21 |
| ZFP36L2.17      | 9.31E-16 | -2.614179944 | 0.517 | 0.7   | 2.14E-11    | 21 |
| CORO1A.17       | 9.38E-16 | -2.17471504  | 0.191 | 0.567 | 2.15E-11    | 21 |
| XIST.14         | 1.18E-15 | 0.740262712  | 0.831 | 0.421 | 2.71E-11    | 21 |
| TPRKB.1         | 1.32E-15 | 0.642568415  | 0.449 | 0.148 | 3.04E-11    | 21 |
| GNG5.12         | 1.68E-15 | 0.59300843   | 0.775 | 0.349 | 3.87E-11    | 21 |
| ARL6IP1.7       | 2.38E-15 | 0.664817495  | 0.708 | 0.318 | 5.48E-11    | 21 |
| MT-ND4.13       | 2.64E-15 | 0.591244331  | 0.966 | 0.873 | 6.07E-11    | 21 |
| WSB1.10         | 4.89E-15 | 0.629984821  | 0.753 | 0.357 | 1.12E-10    | 21 |
| RBMS1.4         | 5.01E-15 | 0.507257495  | 0.562 | 0.203 | 1.15E-10    | 21 |
| ENPP2.3         | 6.36E-15 | -0.754476657 | 0.427 | 0.124 | 1.46E-10    | 21 |
| BAZ2B.2         | 7.10E-15 | 0.507771575  | 0.472 | 0.158 | 1.63E-10    | 21 |
| S100A4.18       | 1.31E-14 | -2.420401    | 0.573 | 0.7   | 3.01E-10    | 21 |
| LAPTM5.16       | 1.32E-14 | -2.159949477 | 0.247 | 0.569 | 3.03E-10    | 21 |
| POLE4.1         | 1.41E-14 | 0.503834416  | 0.517 | 0.184 | 3.25E-10    | 21 |
| ARRDC3.3        | 1.53E-14 | 0.626250691  | 0.528 | 0.196 | 3.51E-10    | 21 |
| STC1.3          | 1.75E-14 | 0.739579102  | 0.281 | 0.069 | 4.03E-10    | 21 |
| RPL28.14        | 2.56E-14 | -0.745412126 | 0.989 | 0.932 | 5.89E-10    | 21 |
| BTG1.20         | 3.40E-14 | -1.603788104 | 0.944 | 0.842 | 7.81E-10    | 21 |
| ACTB.16         | 5.28E-14 | -1.060737122 | 1     | 0.928 | 1.21E-09    | 21 |
| CCL5.19         | 8.27E-14 | -3.526194007 | 0.236 | 0.564 | 1.90E-09    | 21 |
| CD69.19         | 1.29E-13 | -2.863865376 | 0.169 | 0.531 | 2.95E-09    | 21 |
| NEAT1.14        | 1.31E-13 | 0.590326583  | 0.966 | 0.752 | 3.02E-09    | 21 |
| SERBP1.5        | 1.32E-13 | 0.558282579  | 0.798 | 0.401 | 3.04E-09    | 21 |
| PARP14.4        | 2.07E-13 | 0.782795936  | 0.528 | 0.203 | 4.77E-09    | 21 |
| NUCKS1.9        | 2.28E-13 | 0.519029301  | 0.82  | 0.395 | 5.24E-09    | 21 |
| LRRFIP1.11      | 4.81E-13 | 0.554020862  | 0.831 | 0.41  | 1.11E-08    | 21 |
| RPS29.16        | 4.90E-13 | -0.823532962 | 1     | 0.921 | 1.13E-08    | 21 |
| MT-CO3.12       | 7.62E-13 | 0.530182214  | 0.978 | 0.879 | 1.75E-08    | 21 |
| CD37.15         | 8.66E-13 | -1.741115161 | 0.101 | 0.465 | 1.99E-08    | 21 |
| TRAC.21         | 1.68E-12 | -2.452287243 | 0.067 | 0.434 | 3.86E-08    | 21 |
| CD44.15         | 1.79E-12 | -1.794647909 | 0.135 | 0.493 | 4.11E-08    | 21 |
| MTRNR2L12.1     | 7.94E-12 | 0.587478324  | 0.472 | 0.179 | 1.82E-07    | 21 |
| FYB.18          | 1.48E-11 | -1.80567057  | 0.135 | 0.462 | 3.39E-07    | 21 |
| STK17B.16       | 2.02E-11 | -1.704420517 | 0.056 | 0.403 | 4.63E-07    | 21 |
| HLA-E.18        | 2.12E-11 | 0.545782082  | 1     | 0.788 | 4.87E-07    | 21 |
| SLA.17          | 2.40E-11 | -1.646023168 | 0.056 | 0.401 | 5.51E-07    | 21 |
| MT-ND4L.11      | 2.70E-11 | 0.555251414  | 0.73  | 0.358 | 6.19E-07    | 21 |
| GOLGB1.5        | 3.87E-11 | 0.533315876  | 0.517 | 0.22  | 8.89E-07    | 21 |
| CYTIP.18        | 4.69E-11 | -1.788446422 | 0.157 | 0.477 | 1.08E-06    | 21 |
| CD52.16         | 8.17E-11 | -2.402293728 | 0.315 | 0.55  | 1.88E-06    | 21 |
| LSP1.20         | 1.40E-10 | -1.605407574 | 0.124 | 0.436 | 3.22E-06    | 21 |
| CD2.20          | 1.54E-10 | -2.276569551 | 0.169 | 0.459 | 3.55E-06    | 21 |
| RPL41.16        | 2.44E-10 | -0.503059025 | 1     | 0.976 | 5.62E-06    | 21 |
| HP1BP3.10       | 2.99E-10 | 0.508882129  | 0.618 | 0.283 | 6.88E-06    | 21 |
| SYNGR2.3        | 3.59E-10 | 0.547626225  | 0.427 | 0.166 | 8.25E-06    | 21 |
| CST7.18         | 3.83E-10 | -2.182113639 | 0.079 | 0.391 | 8.81E-06    | 21 |
| ITGB2.18        | 4.79E-10 | -1.559612217 | 0.112 | 0.417 | 1.10E-05    | 21 |
| MT-ND5.12       | 7.83E-10 | 0.572429906  | 0.933 | 0.608 | 1.80E-05    | 21 |
| GMFG.12         | 9.06E-10 | -1.495360591 | 0.326 | 0.557 | 2.08E-05    | 21 |
| DUSP2.19        | 1.38E-09 | -2.276249268 | 0.146 | 0.433 | 3.17E-05    | 21 |
| CD3E.20         | 1.78E-09 | -1.744221911 | 0.112 | 0.399 | 4.09E-05    | 21 |
| GZMA.20         | 2.94E-09 | -2.327280052 | 0.146 | 0.421 | 6.76E-05    | 21 |
| CD53.14         | 2.97E-09 | -1.448736084 | 0.202 | 0.472 | 6.83E-05    | 21 |
| SAMSN1.13       | 4.05E-09 | -1.535579263 | 0.034 | 0.324 | 9.30E-05    | 21 |
| RP11-347P5.1.20 | 4.46E-09 | -1.678194093 | 0.079 | 0.377 | 0.000102453 | 21 |

|               |           |              |       |       |             |    |
|---------------|-----------|--------------|-------|-------|-------------|----|
| LCP1.18       | 6.52E-09  | -1.413344458 | 0.124 | 0.406 | 0.000149884 | 21 |
| RAC2.19       | 9.17E-09  | -1.424301728 | 0.09  | 0.374 | 0.000210778 | 21 |
| RPLP2.11      | 1.11E-08  | -0.502636713 | 1     | 0.944 | 0.000255269 | 21 |
| GLIPR1.14     | 1.27E-08  | -1.262623262 | 0.022 | 0.301 | 0.000290739 | 21 |
| H3F3B.13      | 1.65E-08  | -0.883590039 | 0.955 | 0.833 | 0.000378619 | 21 |
| CD3D.21       | 1.72E-08  | -2.02557695  | 0.258 | 0.476 | 0.000394957 | 21 |
| RPL27A.10     | 2.13E-08  | -0.52253152  | 0.966 | 0.93  | 0.000489751 | 21 |
| RPL18A.11     | 4.03E-08  | -0.57030228  | 1     | 0.929 | 0.00092702  | 21 |
| TXNIP.16      | 4.53E-08  | -1.409050902 | 0.82  | 0.763 | 0.001041308 | 21 |
| CD48.18       | 4.78E-08  | -1.274263342 | 0.112 | 0.377 | 0.001098322 | 21 |
| EVI2B.13      | 4.90E-08  | -1.347040146 | 0.079 | 0.337 | 0.001124925 | 21 |
| RGS10.14      | 5.16E-08  | -1.248338536 | 0.034 | 0.297 | 0.001185121 | 21 |
| STK4.16       | 5.71E-08  | -1.473860097 | 0.236 | 0.473 | 0.001312562 | 21 |
| UCP2.16       | 6.49E-08  | -1.316996857 | 0.09  | 0.348 | 0.001491064 | 21 |
| TRBC2.20      | 6.88E-08  | -1.919723727 | 0.135 | 0.378 | 0.001580795 | 21 |
| CD3G.20       | 6.93E-08  | -1.430587109 | 0.034 | 0.295 | 0.00159249  | 21 |
| ARHGDIB.13    | 9.07E-08  | -1.177642587 | 0.697 | 0.672 | 0.002084318 | 21 |
| IL2RG.21      | 9.54E-08  | -1.540120977 | 0.135 | 0.374 | 0.002192954 | 21 |
| IL32.17       | 1.14E-07  | -1.902121377 | 0.438 | 0.579 | 0.002626138 | 21 |
| EVL.19        | 1.41E-07  | -1.484763064 | 0.303 | 0.496 | 0.00324469  | 21 |
| CELF2.16      | 2.39E-07  | -1.292669346 | 0.202 | 0.427 | 0.005500833 | 21 |
| SYTL3.18      | 2.67E-07  | -1.282213961 | 0.034 | 0.279 | 0.006145639 | 21 |
| PRDM1.14      | 3.87E-07  | -1.439208104 | 0.056 | 0.293 | 0.00889068  | 21 |
| EVI2A.15      | 4.25E-07  | -1.133292128 | 0.045 | 0.281 | 0.009768896 | 21 |
| LTB.18        | 4.44E-07  | -1.778347477 | 0.067 | 0.303 | 0.01019993  | 21 |
| ADGRE5.18     | 4.70E-07  | -1.342428906 | 0.067 | 0.301 | 0.010808039 | 21 |
| RCSD1.13      | 6.19E-07  | -0.964484886 | 0.022 | 0.251 | 0.014222078 | 21 |
| PIK3R1.15     | 6.69E-07  | -1.287382966 | 0.079 | 0.31  | 0.015368696 | 21 |
| ACAP1.20      | 6.95E-07  | -1.280463288 | 0.101 | 0.334 | 0.015980345 | 21 |
| CLEC2D.20     | 7.47E-07  | -1.387802551 | 0.079 | 0.308 | 0.017170766 | 21 |
| IL10RA.16     | 8.31E-07  | -1.057384978 | 0.034 | 0.26  | 0.019090308 | 21 |
| TRAF3IP3.19   | 1.00E-06  | -1.079215902 | 0.034 | 0.257 | 0.023049711 | 21 |
| LCK.21        | 1.07E-06  | -1.253949041 | 0.067 | 0.289 | 0.024647026 | 21 |
| RNASET2.18    | 1.16E-06  | -1.702256132 | 0.157 | 0.362 | 0.026616853 | 21 |
| TRBC1.20      | 1.32E-06  | -2.159469626 | 0.146 | 0.354 | 0.030421647 | 21 |
| BIN2.15       | 2.17E-06  | -1.038316682 | 0.034 | 0.251 | 0.049926296 | 21 |
| TPSB2         | 0         | 8.251276593  | 1     | 0.017 | 0           | 22 |
| TPSAB1        | 0         | 7.937249363  | 1     | 0.016 | 0           | 22 |
| CPA3          | 0         | 4.809157659  | 0.943 | 0.005 | 0           | 22 |
| CTSG          | 0         | 4.287322549  | 0.415 | 0.001 | 0           | 22 |
| MS4A2         | 0         | 3.928966951  | 0.887 | 0.003 | 0           | 22 |
| HPGDS         | 0         | 3.720808044  | 0.811 | 0.014 | 0           | 22 |
| RGS13         | 0         | 3.377325601  | 0.83  | 0.01  | 0           | 22 |
| VWA5A         | 0         | 3.342386805  | 0.811 | 0.016 | 0           | 22 |
| SLC18A2       | 0         | 3.174600699  | 0.717 | 0.001 | 0           | 22 |
| GATA2         | 0         | 3.168052674  | 0.792 | 0.012 | 0           | 22 |
| IL1RL1        | 0         | 3.125006408  | 0.83  | 0.003 | 0           | 22 |
| KIT           | 0         | 2.917228095  | 0.774 | 0.003 | 0           | 22 |
| HDC           | 0         | 2.429023174  | 0.679 | 0.001 | 0           | 22 |
| RP11-354E11.2 | 0         | 1.81396027   | 0.491 | 0.001 | 0           | 22 |
| MLPH          | 0         | 1.502503925  | 0.377 | 0.002 | 0           | 22 |
| TPSD1         | 0         | 1.305977908  | 0.264 | 0     | 0           | 22 |
| GCSAML        | 0         | 1.256758915  | 0.283 | 0     | 0           | 22 |
| STXBP6        | 0         | 1.223559437  | 0.321 | 0.002 | 0           | 22 |
| AC004791.2    | 0         | 0.905269279  | 0.264 | 0     | 0           | 22 |
| KRT1          | 8.01E-260 | 1.66352173   | 0.302 | 0.003 | 1.84E-255   | 22 |
| NTM           | 1.57E-246 | 1.851726608  | 0.358 | 0.005 | 3.60E-242   | 22 |
| CALB2         | 2.64E-205 | 1.378543634  | 0.321 | 0.005 | 6.06E-201   | 22 |

|             |           |              |       |       |           |    |
|-------------|-----------|--------------|-------|-------|-----------|----|
| P2RX1       | 4.51E-180 | 1.386768444  | 0.321 | 0.005 | 1.04E-175 | 22 |
| C1orf186.3  | 3.91E-124 | 2.654359943  | 0.811 | 0.057 | 8.98E-120 | 22 |
| FLJ21408    | 1.39E-113 | 1.259326757  | 0.321 | 0.009 | 3.20E-109 | 22 |
| MAOB.2      | 8.76E-109 | 1.985869411  | 0.604 | 0.035 | 2.01E-104 | 22 |
| LTC4S.3     | 2.35E-101 | 2.928453541  | 0.83  | 0.078 | 5.41E-97  | 22 |
| HPGD.1      | 2.92E-94  | 3.46977765   | 0.679 | 0.053 | 6.72E-90  | 22 |
| RAB27B      | 8.26E-83  | 1.365315555  | 0.283 | 0.01  | 1.90E-78  | 22 |
| SMYD3       | 4.13E-63  | 1.647113959  | 0.509 | 0.043 | 9.50E-59  | 22 |
| HS3ST1.1    | 2.51E-51  | 1.258378219  | 0.302 | 0.019 | 5.76E-47  | 22 |
| FCER1A      | 6.48E-46  | 0.96651783   | 0.302 | 0.02  | 1.49E-41  | 22 |
| SDPR.3      | 1.32E-40  | 1.387280896  | 0.585 | 0.078 | 3.04E-36  | 22 |
| CAPG.3      | 2.72E-37  | 1.993473168  | 0.868 | 0.228 | 6.24E-33  | 22 |
| BTK.3       | 4.01E-36  | 1.491618882  | 0.472 | 0.065 | 9.22E-32  | 22 |
| AREG.4      | 6.08E-36  | 2.572281967  | 0.849 | 0.207 | 1.40E-31  | 22 |
| ACOT7.1     | 4.21E-34  | 1.147923859  | 0.377 | 0.042 | 9.67E-30  | 22 |
| CD9.6       | 8.02E-34  | 1.941419234  | 0.83  | 0.221 | 1.84E-29  | 22 |
| CSF1        | 3.81E-33  | 1.888616868  | 0.34  | 0.036 | 8.77E-29  | 22 |
| LAPTM4A.15  | 1.65E-32  | 2.355380276  | 0.906 | 0.35  | 3.80E-28  | 22 |
| LMO4.2      | 3.09E-32  | 2.234834643  | 0.585 | 0.113 | 7.11E-28  | 22 |
| CLU.7       | 6.54E-29  | 1.84659849   | 0.755 | 0.196 | 1.50E-24  | 22 |
| EGR1.4      | 2.00E-28  | 2.275350135  | 0.642 | 0.14  | 4.59E-24  | 22 |
| ANKRD28     | 2.31E-28  | 1.617982046  | 0.566 | 0.109 | 5.32E-24  | 22 |
| LMNA.5      | 3.27E-26  | 2.020303866  | 0.679 | 0.173 | 7.52E-22  | 22 |
| STX3        | 7.15E-26  | 1.006734213  | 0.321 | 0.04  | 1.64E-21  | 22 |
| RENB.2      | 8.63E-25  | 1.560799143  | 0.396 | 0.065 | 1.98E-20  | 22 |
| FER         | 9.31E-25  | 0.80196021   | 0.283 | 0.033 | 2.14E-20  | 22 |
| CD63.17     | 1.69E-24  | 1.758479878  | 0.962 | 0.518 | 3.87E-20  | 22 |
| ALOX5AP.17  | 4.35E-24  | 1.731306865  | 0.849 | 0.327 | 1.00E-19  | 22 |
| MAML1.2     | 1.43E-22  | 1.077872399  | 0.358 | 0.056 | 3.28E-18  | 22 |
| CD69.20     | 3.04E-22  | 2.279333022  | 0.943 | 0.527 | 6.97E-18  | 22 |
| ANXA1.17    | 3.79E-21  | 2.043800715  | 0.887 | 0.47  | 8.70E-17  | 22 |
| JUN.14      | 6.52E-21  | 1.609972264  | 0.962 | 0.691 | 1.50E-16  | 22 |
| ACSL4.2     | 6.57E-21  | 1.160202474  | 0.415 | 0.081 | 1.51E-16  | 22 |
| ALOX5.4     | 1.29E-20  | 1.336389169  | 0.453 | 0.099 | 2.96E-16  | 22 |
| FOXP1.12    | 2.44E-20  | 1.655450521  | 0.755 | 0.256 | 5.61E-16  | 22 |
| PPP1R15A.10 | 5.23E-20  | 1.806430228  | 0.868 | 0.401 | 1.20E-15  | 22 |
| PTGS1.2     | 7.15E-20  | 1.247269299  | 0.321 | 0.052 | 1.64E-15  | 22 |
| FOS.19      | 1.33E-19  | 1.811652205  | 0.943 | 0.681 | 3.05E-15  | 22 |
| MITF.2      | 1.33E-19  | 0.92414815   | 0.321 | 0.053 | 3.05E-15  | 22 |
| CTNBL1      | 2.13E-19  | 1.225342054  | 0.509 | 0.125 | 4.90E-15  | 22 |
| SLC26A2     | 3.06E-19  | 1.350044747  | 0.302 | 0.047 | 7.04E-15  | 22 |
| PLAUR.3     | 3.34E-19  | 1.228317802  | 0.509 | 0.121 | 7.69E-15  | 22 |
| RNF130.5    | 8.37E-19  | 1.315916589  | 0.585 | 0.164 | 1.92E-14  | 22 |
| GLUL.14     | 1.04E-18  | 1.370177028  | 0.792 | 0.304 | 2.38E-14  | 22 |
| LEO1        | 1.81E-18  | 0.858055567  | 0.302 | 0.048 | 4.16E-14  | 22 |
| H3F3B.14    | 3.87E-18  | 1.30082168   | 0.962 | 0.834 | 8.89E-14  | 22 |
| SAMSN1.14   | 1.29E-16  | 1.772666253  | 0.736 | 0.321 | 2.97E-12  | 22 |
| FTH1.18     | 1.31E-16  | 0.877947081  | 1     | 0.962 | 3.02E-12  | 22 |
| BEX4.2      | 2.57E-16  | 1.466249342  | 0.453 | 0.119 | 5.92E-12  | 22 |
| CD82.3      | 3.55E-16  | 1.113120004  | 0.453 | 0.111 | 8.16E-12  | 22 |
| CXCR4.16    | 4.53E-16  | -2.987768029 | 0.34  | 0.777 | 1.04E-11  | 22 |
| FOSB.10     | 5.33E-16  | 1.43510806   | 0.83  | 0.424 | 1.22E-11  | 22 |
| IER2.10     | 6.86E-16  | 1.950839014  | 0.792 | 0.399 | 1.58E-11  | 22 |
| TESPA1      | 1.38E-15  | 1.058906014  | 0.321 | 0.06  | 3.17E-11  | 22 |
| ARHGAP18.3  | 1.64E-15  | 1.235733824  | 0.585 | 0.196 | 3.77E-11  | 22 |
| RGS2.19     | 8.79E-15  | 2.235535786  | 0.717 | 0.334 | 2.02E-10  | 22 |
| SRGN.18     | 1.41E-14  | 1.133621965  | 1     | 0.79  | 3.23E-10  | 22 |
| RAB32.2     | 2.36E-14  | 1.039661419  | 0.377 | 0.092 | 5.42E-10  | 22 |

|                |          |              |       |       |             |    |
|----------------|----------|--------------|-------|-------|-------------|----|
| NR4A1.6        | 3.36E-14 | 1.073065718  | 0.434 | 0.114 | 7.73E-10    | 22 |
| NFKBIA.17      | 3.70E-14 | 1.561579351  | 0.868 | 0.557 | 8.50E-10    | 22 |
| FCER1G.19      | 6.24E-14 | 0.902376264  | 0.792 | 0.301 | 1.43E-09    | 22 |
| TMSB10.14      | 7.75E-14 | -1.265393342 | 0.943 | 0.96  | 1.78E-09    | 22 |
| ASAH1.8        | 1.29E-13 | 1.233140848  | 0.642 | 0.239 | 2.97E-09    | 22 |
| GALC.1         | 1.49E-13 | 0.990146626  | 0.321 | 0.07  | 3.43E-09    | 22 |
| RHOBTB3.1      | 1.61E-13 | 0.964888673  | 0.283 | 0.056 | 3.70E-09    | 22 |
| MAST4.2        | 1.77E-13 | 0.805548811  | 0.302 | 0.061 | 4.06E-09    | 22 |
| MSRA           | 1.77E-13 | 0.875425698  | 0.34  | 0.078 | 4.08E-09    | 22 |
| FAM46A.2       | 2.03E-13 | 1.14689723   | 0.358 | 0.086 | 4.67E-09    | 22 |
| CD33.3         | 3.05E-13 | 1.015253444  | 0.283 | 0.058 | 7.02E-09    | 22 |
| MT-ND4L.12     | 3.67E-13 | 1.257016778  | 0.736 | 0.359 | 8.44E-09    | 22 |
| RPL28.15       | 4.97E-13 | -0.962944963 | 0.962 | 0.932 | 1.14E-08    | 22 |
| TXNIP.17       | 5.20E-13 | -2.39506609  | 0.434 | 0.765 | 1.20E-08    | 22 |
| RPL37A.6       | 1.08E-12 | 0.703542873  | 0.962 | 0.906 | 2.48E-08    | 22 |
| RGS1.21        | 1.51E-12 | 1.344834902  | 0.962 | 0.696 | 3.46E-08    | 22 |
| ADRB2          | 1.94E-12 | 1.095157419  | 0.302 | 0.067 | 4.45E-08    | 22 |
| PTMA.10        | 1.98E-12 | 0.721636281  | 0.962 | 0.917 | 4.56E-08    | 22 |
| SEPT2.10       | 2.43E-12 | 1.193756388  | 0.604 | 0.26  | 5.58E-08    | 22 |
| RPL34.13       | 2.49E-12 | 0.659559388  | 0.981 | 0.953 | 5.72E-08    | 22 |
| SLC44A1.3      | 2.93E-12 | 1.015288784  | 0.321 | 0.077 | 6.73E-08    | 22 |
| CRBN.1         | 3.07E-12 | 1.008147561  | 0.491 | 0.166 | 7.06E-08    | 22 |
| ZSWIM4         | 3.22E-12 | 1.144215175  | 0.34  | 0.083 | 7.39E-08    | 22 |
| STMN1.2        | 3.64E-12 | 0.830419473  | 0.453 | 0.137 | 8.36E-08    | 22 |
| C4orf48.4      | 4.66E-12 | 1.187662956  | 0.528 | 0.197 | 1.07E-07    | 22 |
| CPM.4          | 5.90E-12 | 1.136486435  | 0.453 | 0.136 | 1.35E-07    | 22 |
| HLA-B.17       | 1.36E-11 | -1.047034036 | 0.906 | 0.914 | 3.12E-07    | 22 |
| GRAP2          | 1.92E-11 | 0.961177595  | 0.321 | 0.076 | 4.41E-07    | 22 |
| MT-ND3.15      | 2.90E-11 | 0.776598593  | 0.981 | 0.83  | 6.67E-07    | 22 |
| CKLF.14        | 3.04E-11 | 1.185916295  | 0.698 | 0.362 | 6.99E-07    | 22 |
| MT-ATP6.15     | 3.21E-11 | 0.706507442  | 0.981 | 0.859 | 7.37E-07    | 22 |
| TMEM154.1      | 3.37E-11 | 0.698284792  | 0.321 | 0.079 | 7.74E-07    | 22 |
| RPL7.11        | 3.61E-11 | 0.581294845  | 1     | 0.92  | 8.30E-07    | 22 |
| PLIN2.15       | 4.57E-11 | 0.929118593  | 0.717 | 0.334 | 1.05E-06    | 22 |
| TSC22D1.6      | 4.93E-11 | 0.998388194  | 0.528 | 0.182 | 1.13E-06    | 22 |
| CTD-3252C9.4.3 | 5.58E-11 | 1.015908059  | 0.547 | 0.201 | 1.28E-06    | 22 |
| ITM2C.5        | 6.54E-11 | 0.768569236  | 0.491 | 0.155 | 1.50E-06    | 22 |
| SEMA4A         | 1.24E-10 | 1.016961794  | 0.264 | 0.06  | 2.85E-06    | 22 |
| NFKBIZ.2       | 1.76E-10 | 1.422849919  | 0.528 | 0.215 | 4.06E-06    | 22 |
| IL32.18        | 4.10E-10 | -2.477360254 | 0.151 | 0.579 | 9.42E-06    | 22 |
| CCL5.20        | 4.92E-10 | -3.138095431 | 0.132 | 0.563 | 1.13E-05    | 22 |
| NDUFA4.11      | 5.07E-10 | 1.01165716   | 0.83  | 0.538 | 1.17E-05    | 22 |
| HLA-DPB1.17    | 6.05E-10 | -2.988964422 | 0.264 | 0.634 | 1.39E-05    | 22 |
| FYB.19         | 6.58E-10 | -2.043688571 | 0.019 | 0.461 | 1.51E-05    | 22 |
| PEBP1.16       | 8.44E-10 | 1.043042365  | 0.717 | 0.389 | 1.94E-05    | 22 |
| HLA-A.17       | 8.80E-10 | -1.103989019 | 0.887 | 0.894 | 2.02E-05    | 22 |
| CORO1A.18      | 1.05E-09 | -1.969636424 | 0.17  | 0.566 | 2.41E-05    | 22 |
| KCNQ1OT1.3     | 1.08E-09 | 0.718604331  | 0.34  | 0.096 | 2.49E-05    | 22 |
| SOCS1.3        | 1.83E-09 | 1.390761592  | 0.472 | 0.18  | 4.20E-05    | 22 |
| MT-ND4.14      | 2.19E-09 | 0.676796657  | 0.943 | 0.874 | 5.03E-05    | 22 |
| PFN1.14        | 2.34E-09 | -1.409438154 | 0.547 | 0.761 | 5.39E-05    | 22 |
| MT-CO2.13      | 2.81E-09 | 0.642985284  | 0.943 | 0.874 | 6.45E-05    | 22 |
| HLA-C.16       | 3.16E-09 | -0.973769091 | 0.906 | 0.883 | 7.26E-05    | 22 |
| TMSB4X.12      | 3.73E-09 | -0.722108453 | 1     | 0.977 | 8.57E-05    | 22 |
| JUNB.18        | 4.62E-09 | 0.956060725  | 0.981 | 0.722 | 0.000106062 | 22 |
| CD74.15        | 4.89E-09 | -2.539369832 | 0.623 | 0.795 | 0.000112373 | 22 |
| GPR65.3        | 5.09E-09 | 1.303581824  | 0.509 | 0.208 | 0.000116868 | 22 |
| LYL1.3         | 5.61E-09 | 1.05427964   | 0.264 | 0.07  | 0.000128874 | 22 |

|             |          |              |       |       |             |    |
|-------------|----------|--------------|-------|-------|-------------|----|
| FXD5.13     | 6.31E-09 | 0.99984847   | 0.774 | 0.48  | 0.000145116 | 22 |
| HLA-DPA1.17 | 8.11E-09 | -2.999300215 | 0.226 | 0.572 | 0.000186321 | 22 |
| ATP6V1F.11  | 1.22E-08 | 1.015599869  | 0.66  | 0.349 | 0.000280978 | 22 |
| CD3E.21     | 1.33E-08 | -1.998534949 | 0     | 0.399 | 0.00030537  | 22 |
| PRNP.1      | 1.82E-08 | 0.798582446  | 0.377 | 0.132 | 0.00041913  | 22 |
| SELK.9      | 2.33E-08 | 1.065049848  | 0.623 | 0.333 | 0.000536421 | 22 |
| HINT1.10    | 2.38E-08 | -1.523944637 | 0.283 | 0.627 | 0.000545919 | 22 |
| S100A6.12   | 2.70E-08 | 0.618243886  | 0.906 | 0.766 | 0.000619427 | 22 |
| LAT2.3      | 2.90E-08 | 1.03518479   | 0.302 | 0.095 | 0.000667057 | 22 |
| CYTIP.19    | 3.04E-08 | -1.459123085 | 0.075 | 0.477 | 0.000699126 | 22 |
| LPCAT2.2    | 3.14E-08 | 1.010759445  | 0.283 | 0.085 | 0.000720752 | 22 |
| CD2.21      | 3.88E-08 | -2.325002197 | 0.094 | 0.458 | 0.000891391 | 22 |
| TRAC.22     | 4.97E-08 | -2.321508434 | 0.057 | 0.433 | 0.001143266 | 22 |
| DUSP10.1    | 5.44E-08 | 0.820794666  | 0.321 | 0.101 | 0.001250187 | 22 |
| BHLHE40.4   | 5.52E-08 | 0.938302496  | 0.434 | 0.171 | 0.001268206 | 22 |
| GPX4.13     | 6.02E-08 | 0.768245357  | 0.774 | 0.453 | 0.001383568 | 22 |
| FOSL2.1     | 6.39E-08 | 0.784052181  | 0.358 | 0.12  | 0.001468961 | 22 |
| AHI1        | 6.85E-08 | 0.566194423  | 0.283 | 0.082 | 0.00157308  | 22 |
| ACTB.17     | 8.41E-08 | -0.971870536 | 0.981 | 0.929 | 0.001933461 | 22 |
| PLGRKT      | 1.07E-07 | 1.029749364  | 0.302 | 0.097 | 0.002469746 | 22 |
| SPINT2.5    | 1.30E-07 | 0.602790353  | 0.396 | 0.149 | 0.002998459 | 22 |
| SNX29.1     | 1.40E-07 | 0.730465272  | 0.264 | 0.078 | 0.003208263 | 22 |
| SDCBP.16    | 1.44E-07 | 0.700450761  | 0.698 | 0.371 | 0.003307687 | 22 |
| S100A10.13  | 1.46E-07 | -1.889237739 | 0.321 | 0.611 | 0.00334795  | 22 |
| EVL.20      | 1.95E-07 | -1.547656633 | 0.132 | 0.497 | 0.004470839 | 22 |
| RPS6KA5.1   | 2.43E-07 | 0.893352803  | 0.283 | 0.089 | 0.005588099 | 22 |
| EMP3.11     | 2.51E-07 | 0.856791587  | 0.679 | 0.389 | 0.00577396  | 22 |
| TSPAN4.5    | 2.52E-07 | 0.950260783  | 0.302 | 0.101 | 0.005796887 | 22 |
| ANXA2.15    | 2.86E-07 | -1.816794693 | 0.038 | 0.394 | 0.006578722 | 22 |
| STK17A.19   | 3.03E-07 | -1.619094742 | 0.019 | 0.368 | 0.006965955 | 22 |
| BST2.13     | 3.32E-07 | 0.796477608  | 0.642 | 0.36  | 0.007639354 | 22 |
| CFLAR.13    | 4.50E-07 | -1.478452487 | 0.075 | 0.424 | 0.01034507  | 22 |
| TRBC2.21    | 5.00E-07 | -1.99511206  | 0.038 | 0.378 | 0.011482283 | 22 |
| BTG2.11     | 5.15E-07 | 1.256099584  | 0.604 | 0.356 | 0.011836418 | 22 |
| GZMA.21     | 5.21E-07 | -2.003533877 | 0.075 | 0.42  | 0.011982561 | 22 |
| TSEN54      | 5.90E-07 | 0.735610714  | 0.302 | 0.098 | 0.013556069 | 22 |
| DUSP1.16    | 5.91E-07 | 0.646746107  | 0.943 | 0.793 | 0.013580799 | 22 |
| GADD45B.5   | 6.01E-07 | 0.8565421    | 0.509 | 0.233 | 0.013814814 | 22 |
| ACTG1.12    | 6.58E-07 | -1.194172488 | 0.642 | 0.746 | 0.015125268 | 22 |
| CTSD.12     | 6.92E-07 | 0.760092029  | 0.679 | 0.436 | 0.015907836 | 22 |
| RPL36AL.7   | 7.04E-07 | 0.712806784  | 0.887 | 0.711 | 0.016187591 | 22 |
| HCST.17     | 7.60E-07 | -1.56079087  | 0.226 | 0.546 | 0.01746903  | 22 |
| MAPRE1.2    | 7.68E-07 | 0.919891817  | 0.415 | 0.183 | 0.017653535 | 22 |
| ACER3.3     | 8.06E-07 | 0.727548241  | 0.264 | 0.086 | 0.018512387 | 22 |
| PRDX6.10    | 1.02E-06 | 0.849433721  | 0.585 | 0.324 | 0.023498779 | 22 |
| ETS1.18     | 1.10E-06 | -1.59150905  | 0.019 | 0.34  | 0.025186521 | 22 |
| GIMAP4.16   | 1.21E-06 | -1.46999851  | 0.019 | 0.34  | 0.02772635  | 22 |
| SYAP1.6     | 1.21E-06 | 1.012876734  | 0.509 | 0.248 | 0.027824423 | 22 |
| IL18.2      | 1.62E-06 | 0.657699941  | 0.302 | 0.106 | 0.037120438 | 22 |
| CD3D.22     | 1.65E-06 | -1.623404799 | 0.17  | 0.476 | 0.037871478 | 22 |
| SYNE2.18    | 1.75E-06 | -1.552179744 | 0.019 | 0.333 | 0.040261268 | 22 |
| TRBC1.21    | 1.85E-06 | -2.240037842 | 0.038 | 0.354 | 0.042611102 | 22 |
| ISG20.16    | 1.95E-06 | -1.376904797 | 0.038 | 0.362 | 0.044724579 | 22 |

gene  
IL7R  
ZFP36L2  
GPR171  
CD69  
TNFAIP3  
CD40LG  
BTG1  
CD52  
CXCR4  
TSC22D3  
RPS29  
RPS27  
RPL28  
RPLP2  
JUNB  
SARAF  
KLF6  
RPS3  
JUN  
CD2  
AC016831.7  
FTL  
CD74  
CD3D  
STK4  
RORA  
TXNIP  
CD44  
HLA-DRB1  
CD63  
CST3  
CD3E  
RPL14  
ANXA1  
IL32  
PIK3IP1  
RHOB  
LEPROTL1  
LTB  
HLA-DRA  
TYROBP  
RP11-138A9.2  
STK17A  
CYTIP  
IFITM3  
TRAC  
RP11-347P5.1  
RP11-138A9.1  
ODF2L  
FCGR3A  
FCER1G  
HLA-DMA  
SERPINA1  
HSPB1  
RPSA  
GSTP1  
SPOCK2

GPX1  
DDX5  
FCGRT  
ZFP36  
RGS1  
PPP2R5C  
GSN  
TRAT1  
PTMS  
PDK4  
CD9  
AC092580.4  
GRN  
HLA-DQA1  
CD3G  
NFKBIA  
IDS  
NPC2  
EVL  
APLP2  
PTGER4  
S100A4  
PTPRC  
AIF1  
SRSF7  
NNMT  
HLA-DPA1  
HLA-DMB  
CD96  
KLRB1  
PSAP  
PDCD4  
NDUFA4L2  
HLA-DQB1  
SPP1  
ADIRF  
HLA-DPB1  
AIM1  
CEBPD  
FTH1  
ASAH1  
TRBC2  
LAPTM4A  
RAC1  
LYZ  
ACAP1  
FOSB  
YWHAH  
CRYAB  
CYB5A  
GAPDH  
TUBA4A  
TPI1  
FKBP1A  
IGFBP7  
BST2  
FKBP11  
SOD2

PKM  
ETS1  
AAK1  
APOC1  
GPR183  
EML4  
ATOX1  
YWHAE  
LCK  
SMCHD1  
TRBC1  
FXD5  
CCNH  
AKR1B1  
HSPA1A  
ISG20  
HSBP1  
ANXA5  
TYMP  
NDUFC1  
C1QA  
CLEC2D  
PPP1R2  
PRDX1  
CTSB  
TMEM173  
AP2S1  
LST1  
HSP90B1  
TNFAIP8  
STK17B  
FAM129A  
PLIN2  
NAMPT  
CD59  
PARP8  
C1QB  
ALDOA  
NKG7  
ATP6V0B  
CLTA  
EMB  
GNG5  
SAMS1  
CMC1  
HLA-DRB5  
CNOT6L  
FKBP2  
AP1S2  
RNF19A  
CTSD  
SLIRP  
CTSS  
LYAR  
MT2A  
BTG2  
RGS2  
TOB1



RHOC  
APOE  
ELF1  
CD48  
SNX3  
SAT1  
DSTN  
SLC2A3  
RTN4  
IGFBP3  
PLP2  
PDE4B  
CANX  
TIMP1  
GLRX  
GSTO1  
FYN  
PRDX6  
BNIP3L  
SYNE2  
LINC-PINT  
FOXP1  
CELF2  
RNASET2  
HMGN3  
PPT1  
SOCS1  
ARHGAP15  
ID2  
GPX4  
PBXIP1  
CAPZA2  
HSPD1  
PRDM1  
TUBB  
KIAA1551  
GLUL  
CALR  
VDAC1  
NEAT1  
ZC3HAV1  
DDX24  
DBI  
RPS27L  
POMP  
RHOH  
LAMTOR5  
YPEL5  
PIK3R1  
ZFAND5  
ATP6V1F  
TUBA1B  
VAMP5  
MGST3  
ENO1  
TAGAP  
SEPW1  
LGALS1

ARL4C  
ANKRD12  
ANXA2  
ITM2B  
NDUFB4  
SDCBP  
HNRNPUL1  
IKZF1  
CSTB  
HSP90AB1  
MT1X

6-Sep

PCSK7  
UQCRQ  
LDHA  
IL10RA  
VIM  
LGALS3  
MIF  
S100A9  
PEBP1  
TXN  
NR3C1  
RBPJ  
S100A11  
GNLY  
GZMB  
KLRD1  
FGFBP2  
PRF1  
NKG7  
KLRF1  
CCL4  
CLIC3  
GZMH  
SPON2  
PLAC8  
CD7  
KLRB1  
TRDC  
HOPX  
CST7  
S1PR5  
GZMM  
CD247  
MATK  
CTSW  
FCGR3A  
PTGDR  
SYTL3  
CCL5  
CMC1  
CCL3  
BIN2  
GZMA  
VIM  
XCL2  
TXK

SAMD3  
KLRG1  
DUSP2  
GPR65  
HCST  
ZEB2  
PYHIN1  
LITAF  
MT-CO1  
IL2RB  
AREG  
CD69  
MT-CO2  
ID2  
TYROBP  
AKNA  
ADGRE5  
FTH1  
HLA-C  
FYN  
IRF1  
MYL12A  
CD74  
MAPK1  
KLF2  
TRGC2  
AC092580.4  
CHST12  
MYO1F  
HLA-E  
IER2  
IFITM1  
MBP  
GAPDH  
ANXA1  
ZAP70  
HLA-DRB1  
PPP2R5C  
CCND3  
SRGN  
ARL4C  
HLA-DRA  
CD53  
RUNX3  
PTPN4  
RAC2  
FKBP11  
STK4  
RNF125  
CLEC2B  
COTL1  
SUN2  
PIP4K2A  
HLA-DQB1  
RBM39  
LYAR  
ISG20  
HSPB1

GNG2  
RORA  
TLE4  
TSC22D3  
S100A11  
EVL  
CCL4L2  
SYNE1  
ANXA5  
CYBA  
CD27  
RAP1B  
TAGAP  
GPX1  
FTL  
HLA-DMA  
CST3  
STAT4  
PRDX1  
PIK3R1  
SERPINA1  
HLA-DRB5  
TBC1D10C  
RARRES3  
GNPTAB  
CTD-3252C9.4  
CH17-189H20.1  
CYTIP  
EFHD2  
AES  
LGALS3  
PLEK  
VAMP2  
ARHGAP9  
HLA-DPA1  
CTSB  
ATM  
TYMP  
SELPLG  
BTG2  
RNASET2  
APMAP  
LTB  
FCGRT  
HLA-DQA1  
ETS1  
NPC2  
RP5-1171110.5  
LCP1  
EIF3G  
AIF1  
GRN  
ITGB2  
ABI3  
S100A6  
NR4A2  
CDC42SE1  
LINC00869

IFITM3  
PPT1  
CORO1B  
LYZ  
PTMS  
ZFP36  
PKM  
PTGER4  
ADIRF  
NNMT  
C1orf56  
PTPN7  
ARPC5L  
TIMP1  
AOAH  
ARHGEF1  
WIPF1  
SOD2  
IQGAP2  
NDUFA4L2  
YWHAH  
RGS10  
ENO1  
NDUFC1  
GPATCH8  
LIMD2  
CRYAB  
C9orf142  
DOK2  
IKZF1  
ITM2B  
RSRP1  
PRKCH  
FKBP1A  
PARP8  
LIMS1  
GPX4  
NFKBIA  
SOCS1  
TMEM2  
RAC1  
FLNA  
RBPJ  
RGS1  
JAK1  
LGALS1  
S100A10  
CNOT6L  
SPN  
APOC1  
CD47  
ANXA2  
CD84  
PLIN2  
HLA-DPB1  
IGFBP3  
ALDOA  
IDI1

DUSP4  
GZMK  
TXN  
MT1X  
YWHAE  
MGST3  
SAT1  
REL  
RPS27L  
MT2A  
C1QA  
GSTO1  
HSBP1  
RHOB  
PSAP  
CD55  
DYNLL1  
LAPTM4A  
SLFN5  
APOE  
BIRC3  
PEBP1  
FMNL1  
NAP1L1  
HERPUD1  
CLTA  
RPLP0  
SOD1  
APLP2  
HINT1  
MIF  
VMP1  
SNX3  
CSTB  
LDHB  
LDHA  
S100A9  
TSPO  
VAMP5  
TPI1  
TRAC  
NDUFB4  
TUBA1B  
TUBB  
ZFAS1  
SEPW1  
PGK1  
CTSS  
GLUL  
GZMK  
CCL5  
CD8A  
CCL4  
CD27  
GZMA  
CD8B  
RGS1  
CST7

NKG7  
DUSP4  
CCL4L2  
CD3D  
DUSP2  
ITM2A  
CRTAM  
BTG1  
HLA-DQA2  
CXCR4  
CD2  
HLA-A  
CD3E  
TRAC  
TRBC2  
VIM  
RPS26  
FTH1  
APOBEC3G  
RP11-347P5.1  
TOX  
CMC1  
LYST  
TRBC1  
CD69  
CTSW  
LCK  
TPT1  
LAG3  
TNFRSF9  
SRSF7  
HCST  
EVL  
CD3G  
CORO1A  
PTPRC  
STK4  
TRAT1  
SIT1  
TIMP1  
ACAP1  
IFITM2  
TMEM123  
CCDC167  
CEBPD  
IFNGR1  
SUB1  
CCL3  
IFITM3  
ITM2C  
RARRES3  
IL2RG  
KIAA1551  
CD84  
RHOB  
CLEC2D  
SOD2  
SERPINA1

DSTN  
TERF2IP  
XIST  
CST3  
TYROBP  
PYHIN1  
FCER1G  
TMSB10  
APLP2  
NNMT  
GRN  
RNASET2  
GZMH  
PSMB9  
GLUL  
S100A11  
TUBA4A  
ISG20  
PLIN2  
CYTIP  
LINC00152  
CTSB  
WNK1  
NDUFA4L2  
PPP2R5C  
STK17A  
HLA-F  
C10orf54  
LDHA  
RAC2  
ANXA2  
DDIT4  
FCGRT  
S100A10  
CD63  
RPL17  
PNISR  
MSI2  
CRYAB  
ASAH1  
APOBEC3C  
HSPB1  
PMAIP1  
BTN3A2  
MT-ND4L  
GPX1  
FTL  
ANXA6  
PTPN7  
ZBTB38  
ADIRF  
HAVCR2  
YWHAE  
TMEM2  
YWHAH  
LAPTM4A  
AC090498.1  
CFLAR



IL7R  
AP3S1  
RTN4  
ITM2B  
PPP1R2  
GALM  
TYMP  
RAC1  
RHOH  
TBC1D10C  
ZFAND5  
NPC2  
LAT  
RUNX3  
TAGLN2  
PPT1  
ANXA1  
UCP2  
CCND3  
TSPYL2  
PSAP  
TRAF3IP3  
MIF  
MGST3  
DOCK8  
LYZ  
GPATCH8  
SNX3  
CEBPB  
CHST12  
WIPF1  
GPSM3  
CBLB  
PCSK7  
PIP4K2A  
PRKCH  
IGFBP3  
LIMD2  
LGALS3  
NDUFC1  
AIF1  
HLA-DRA  
IGFBP7  
GNLY  
ENO1  
TUBA1B  
NFKBIA

6-Sep

C1QA  
S100A6  
NEAT1  
TPI1  
FOS  
TXN  
SAT1  
APOC1  
MT2A  
HSPA1B

RPS4Y1  
HSPA1A  
HSPA6  
DNAJB4  
AC090498.1  
RPL17  
PSMD5-AS1  
TRBC2  
CTSW  
TRAC  
CD27  
XIST  
GOLGA8A  
CD3E  
LINC00649  
CD3G  
HSPH1  
NABP1  
CD2  
PTPRC  
SLFN5  
OXNAD1  
ITM2A  
CRIP1  
TBC1D4  
SIRPG  
GOLGA8B  
HNRNPA1L2  
SPOCK2  
KIAA1551  
TTN  
PYHIN1  
RPS4X  
HLA-DRB5  
CACYPB  
CD3D  
EOMES  
TRAF3IP3  
TNFRSF9  
GABPB1-AS1  
DENND2D  
RPS29  
HSPA8  
PILRB  
HSPE1  
FTH1  
LTB  
ITGA4  
MSI2  
IFITM1  
HSPD1  
CD82  
HSP90AA1  
MT-ND5  
DNAJB1  
DUSP1  
SKAP1  
TXK

LCP1  
IKZF1  
CCND2  
CCL3L3  
IL32  
SH2D1A  
RBL2  
EMB  
IL2RG  
RNF213  
CD8A  
MDFIC  
MT-ND4L  
AAK1  
ARAP2  
LAPTM5  
PBXIP1  
PIK3IP1  
CD8B  
ITM2C  
TRBC1  
BCL2  
ZFP36  
CYLD  
LYST  
RAC2  
RP11-796E2.4  
UCP2  
NR4A1  
CHORDC1  
PHTF2  
TRIM22  
GZMK  
JUNB  
TSC22D3  
UGP2  
NKG7  
CMC1  
TMSB10  
DNAJA1  
FTL  
FOS  
CCL4L2  
SPP1  
KLRB1  
CEBPB  
MT1E  
IFITM3  
HBA2  
IGFBP3  
S100A9  
GNLY  
GSTP1  
IGFBP7  
RP11-347P5.1  
ANXA1  
APOE  
YBX1

HLA-DRB1  
RAC1  
MT2A  
ITM2B  
IGKC  
RGCC  
CD63  
VIM  
HBB  
KLF6  
HLA-DPB1  
TNFAIP3  
NNMT  
CEBPD  
POMP  
CRYAB  
DSTN  
LAPTM4A  
RGS1  
HLA-DPA1  
NR4A2  
MT1X  
MT1X  
MT2A  
NNMT  
ANGPTL4  
B2M  
NDUFA4L2  
TMSB4X  
HILPDA  
CD24  
HLA-B  
GAPDH  
HLA-E  
HLA-C  
RPLP0  
RPL36  
TMSB10  
FTH1  
EGLN3  
ARHGDIB  
PTPRC  
BTG1  
CORO1A  
ZFP36L2  
HLA-A  
RPS8  
MYL12A  
ARPC2  
LAPTM5  
GMFG  
RPL41  
ENO1  
RPL10  
TMA7  
CD53  
HCST  
SRGN

FYB  
HLA-DPB1  
CELF2  
RPS5  
CFL1  
EVL  
CYBA  
CRYAB  
RGS1  
S100A4  
CXCR4  
CD44  
SRSF7  
CD74  
CD37  
STK4  
RPL13  
LDHA  
RBM39  
GPSM3  
LSP1  
HLA-DPA1  
RARRES2  
PNISR  
PRPF38B  
HLA-F  
DDX5  
ITGB2  
MGST1  
CD2  
ARGLU1  
RHOA  
CCL5  
AKAP13  
ELF1  
DDX24  
CALM1  
CYTIP  
JAK1  
SH3BGRL3  
LCP1  
ARL6IP5  
SLA  
VAMP2  
VIM  
CD52  
RPL18A  
RPS19  
TNFAIP3  
KMT2E  
ATP1B1  
RNF213  
YWHAZ  
CFLAR  
MALAT1  
CD69  
GIMAP4  
TRAC

YWHAB  
IL2RG  
N4BP2L2  
GZMA  
FNBP1  
CD3E  
HSP90AA1  
AAK1  
CD48  
ATP5E  
SOD2  
RAC2  
HMGB2  
HSPA8  
FXD5  
WIPF1  
DNAJB1  
TPM3  
KIAA1551  
ARPC1B  
PSMB9  
DDX17  
CAP1  
RSRP1  
RPL3  
STK17A  
RPL7  
DUSP2  
ATP5L  
SON  
NKTR  
RPL21  
SP100  
GNAS  
RBM25  
HLA-DRB1  
SRSF2  
MT1E  
UCP2  
RPS2  
ITGB1  
PDK4  
CD3D  
CAPZB

7-Sep

ARPC3  
LRRFIP1  
PFN1  
HLA-DRA  
TERF2IP  
PSME1  
PIK3IP1  
RPL24  
HERPUD1  
NKG7  
LITAF  
PRRC2C  
IDS

TRBC2  
MBNL1  
ISG20  
CTSC  
SMAP2  
SH3KBP1  
SRSF11  
ID2  
C9orf16  
GIMAP7  
ARPC5  
CST7  
MSN  
MT-ND5  
ATRX  
ACTR2  
PCSK7  
CCND3  
ACAP1  
SMCHD1  
BCLAF1  
LIMD2  
CAV1  
DOCK8  
RPS6  
REL  
EVI2B  
ROCK1  
SRRM2  
ETS1  
RP11-347P5.1  
RPS18  
BTG2  
RGS2  
NCL  
LCK  
PIK3R1  
CKLF  
HCLS1  
IGFBP3  
EMB  
UBC  
GCC2  
FKBP5

6-Sep

PPP1R2  
CRIP1  
ARID4B  
RBPJ  
GLIPR1  
UBB  
CARD16  
MYO1F  
APOBEC3G  
GNAI2  
TRBC1  
STK17B  
RPS28

CD27  
IQGAP1  
CCL4  
NR4A2  
YPEL5  
ANKRD44  
GABPB1  
ARHGEF1  
HLA-DQB1  
TMEM50A  
COTL1  
CD3G  
CD84  
RPS4X  
ITM2A  
TRAF3IP3  
RCSD1  
MYCBP2  
ABRACL  
LTB  
EPC1  
PPP2R5C  
RPL34  
RPL26  
H2AFY  
SYNE2  
AKNA  
CD7  
FYN  
EIF3A  
RGCC  
C10orf10  
PNN  
ICAM3  
CCNH  
IKZF1  
SAMSN1  
WNK1  
PAK2  
ACTB  
BIN2  
RGS10  
EVI2A  
KIF5B  
MACF1  
MT-CYB  
ALOX5AP  
YWHAH  
AES  
RHOG  
MYL6  
TRIM22  
HLA-DQA1  
RNF19A  
CLEC2D  
PRKCH

2-Sep

ARL6IP1



JMJD1C  
C10orf54  
IL10RA  
RPS29  
TGOLN2  
ARHGAP15  
ADGRE5  
IFITM2  
TUBA4A  
BTN3A2  
C9orf142  
ATP1B3  
ATM  
RPL36A  
BNIP3  
CMC1  
OSTF1  
SPP1  
GZMK  
CTSS  
BUB3  
FKBP1A  
PRDM1  
ODF2L  
CREM  
SYTL3  
PCM1  
USP15  
TXNIP  
ANXA6  
ITSN2  
CD247  
PPP1R18  
MIF  
RPL31  
HLA-DMA  
LIMS1  
AC090498.1  
DUSP4  
CD96  
CLU  
TPI1  
IL7R  
RPL18  
C1QA  
RPL35A  
RPL38  
TYROBP  
SAT1  
EGR1  
RPL5  
HLA-DRB5  
RPL8  
NUPR1  
RPS16  
RPS13  
APOE  
RPL6

PLIN2  
RPS17  
RPL9  
ZFAS1  
DDIT4  
GPX1  
CYB5A  
SERPINA1  
FCER1G  
AIF1  
DUSP1  
S100A10  
CST3  
RPL22  
NACA  
ALDOA  
GNLY  
PGAM1  
RNASET2  
IFITM3  
CCT8  
SSBP1  
MZT2A  
RSL1D1  
MZT2B  
TMED2  
TOMM20  
ZFP36L1  
SNRPE  
PRDX6  
IGKC  
PCNP  
EIF2S3  
RHOB  
HSPD1  
FBL  
HSPB1  
RSL24D1  
NPM1  
VMP1  
FTL  
FTH1  
LYZ  
S100A9  
TYROBP  
CXCL8  
AIF1  
S100A8  
HLA-DRA  
FCER1G  
IL32  
CD2  
RPS27  
CCL5  
SRSF7  
ZFP36L2  
SON  
CD69

S100A11  
CD3D  
PNISR  
EVL  
TRAC  
CD14  
STK4  
CD3E  
MALAT1  
JUN  
FCN1  
DDX24  
RBM39  
N4BP2L2  
TSC22D3  
VAMP2  
RPL23A  
GZMA  
CIRBP  
XIST  
DUSP2  
RP11-1143G9.4  
ITGB1  
FUS  
RNF213  
CST7  
TRBC2  
ANAPC16  
SYNE2  
ETS1  
PTPRC  
ARGLU1  
AAK1  
PPDPF  
RARRES3  
MT-ND2  
RSRP1  
C12orf57  
ACAP1  
HLA-F  
POLR2J3  
KLF6  
KMT2E  
RPL13A  
PRRC2C  
RPS29  
STK17A  
ATRX  
CD99  
ACTB  
PIK3IP1  
LY6E  
ID2  
SAT1  
NKG7  
JAK1  
CXCR4  
CD74

TNFAIP3  
CFLAR  
GCC2  
RPS26  
PPP2R5C  
CUTA  
NKTR  
TERF2IP  
AKAP13  
CD3G  
LCK  
LEPROTL1  
FNBP1  
TRBC1  
PRPF38B  
MT-CYB  
C1QC  
IDS  
BTG1  
ITM2A  
AKAP9  
IL2RG  
CLEC2D  
ANKRD12  
PEBP1  
SPP1  
ARID4B  
GZMK  
CD7  
GLUL  
GIMAP7  
RP11-347P5.1  
HLA-DRB5  
KIAA1551  
CCND3  
HLA-DRB1  
HLA-A  
DDX5  
OCIAD2  
RPS3  
LST1  
PCSK7  
FYN  
RPL3  
MPHOSPH8  
RNF19A  
GPX1  
SYTL3  
CCL4  
CSTA  
SF1  
TAF7  
EZR  
PPP1R2  
BTN3A2  
MT-ATP6  
CD27  
PIK3R1

ODF2L  
MBNL1  
TNRC6B  
CST3  
EPC1  
RPL31  
FOSB

6-Sep

CD96  
CCNH  
APOBEC3G  
AKNA  
CD247  
CMC1  
YWHAQ  
BUB3  
LIMD2  
NPC2  
SRGN  
C9orf142  
PDCD4  
MYCBP2  
PRKCH  
C1QB  
CRIP1  
ATM  
RHOC  
MNDA  
DOCK8  
GABPB1  
AES  
IGFBP7

9-Sep

DUSP4  
PRDM1  
DNAJB1  
IL7R  
C1QA  
BBX  
TRAF3IP3  
RSF1  
IKZF1  
MACF1  
WHSC1L1  
TSTD1  
EMB  
BIN2  
WNK1  
DSTN  
REL  
BIRC3  
ARID5B  
S100A6  
CCDC85B  
ANXA6  
HLA-DPA1  
LTB  
CD68

HLA-DPB1  
CTSS  
RGCC  
NAMPT  
IGFBP3  
NDUFA4L2  
MS4A6A  
RGS1  
C1orf162  
HLA-DQA1  
GNLY  
CRYAB  
APOC1  
H3F3A  
IFITM3  
APOE  
OAZ1  
HLA-DQB1  
PSAP  
NNMT  
TIMP1  
CTSB  
SDCBP  
GMFG  
MAP1LC3B  
LAMTOR4  
ATP6AP2  
HCLS1  
RGS10  
CEBPB  
LGALS1  
C4orf3  
LITAF  
RAP1A  
CYBA  
ATP6V0E1  
CALR  
RGS2  
HSD17B11  
FCGR3A  
CARD16  
MT2A  
PGK1  
SERPINA1  
NOP10  
CTSC  
TYMP  
RAB5C  
APOE  
C3  
HLA-DRB1  
CST3  
C1QB  
C1QC  
APOC1  
HLA-DPB1  
C1QA  
CD74

HLA-DRA  
HLA-DPA1  
GPX1  
MS4A6A  
HLA-DQA1  
FCGR3A  
TREM2  
NPC2  
KCTD12  
HLA-DMB  
SGK1  
MS4A7  
SLC1A3  
TYROBP  
HLA-DMA  
FCGR2A  
C1orf162  
PLXDC2  
MAFB  
HLA-DQB1  
GPR34  
CSF1R  
MEF2C  
GRN  
LILRB4  
OGFRL1  
CSF2RA  
CXCL16  
ALDH2  
PSAP  
CD302  
AIF1  
FGL2  
HERPUD1  
MARCKS  
CTSB  
FCGRT  
SLC11A1  
MEF2A  
USP53  
SAT1  
FN1  
CEBPD  
CD14  
VSIG4  
CD163  
IL18  
PLD4  
FCER1G  
MSR1  
LY86  
PPT1  
CPVL  
ALOX5AP  
FAM26F  
FCGR1A  
LIPA  
RPS4Y1

MNDA  
CAPG  
LST1  
LPAR6  
SPI1  
RGS10  
IL13RA1  
MFSD1  
EPB41L2  
RNASET2  
TLR2  
CD68  
RNF130  
RNASE6  
LYZ  
TBXAS1  
LPCAT2  
CSF3R  
SORL1  
FKBP5  
CTSS  
ADAP2  
SLC8A1  
CTSZ  
TYMP  
KCNMA1  
SRGAP1  
CLEC7A  
SLCO2B1  
ARHGAP24  
CYBB  
CTSH  
OLR1  
YWHAH  
IFNGR1  
CPM  
DOCK4  
IFI30  
GLUL  
RAB31  
IGSF6  
SERPINF1  
OLFML3  
CD9  
CLEC4E  
ARL5A  
FCGR1B

1-Mar

CD86  
PABPC4  
C10orf54  
HCLS1  
GAPT  
CNPY3  
PKIB  
ALOX5  
ADAM28  
TM6SF1



LAIR1  
SRGAP2  
FCGR2B  
ANKRD22  
DAB2  
RP11-552D4.1  
NCOA4  
TNFSF13B  
PLBD1  
NUDT3  
CLEC5A  
GNB4  
CADM1  
MIS18BP1  
ACSL1  
C3AR1  
ASAH1  
LTC4S  
GABARAP  
RASSF4  
ALCAM  
TGFB1  
AKR1B1  
RGS18  
PLTP  
RB1  
FCGBP  
SESN1  
PRKAG2  
GNAQ  
APBB1IP  
ELMO1  
PILRA  
ADORA3  
HEXA  
ARHGAP18  
TNPO1  
PICALM  
PAK1  
SAMHD1  
DSE  
HTRA1  
LIMS1  
UBL3  
HLA-DOA  
CFD  
NUDT16  
FRMD4A  
TANC2  
SLC7A7  
LINC01094  
SCPEP1  
ATP6V0B  
DPYSL2  
ATP6V1B2  
ZFHX3  
CCDC88A  
MAN2A1

AZI2  
FPR1  
PYCARD  
LHFPL2  
BHLHE41  
LYN  
DST  
KCNMB1  
SRGAP2C  
SIGLEC10  
FILIP1L  
SRGAP2B  
MAP3K8  
AXL  
SDCCAG8  
VMO1  
LAP3  
RHBDF2  
A2M  
APLP2  
SKAP2  
CSTA  
ZNF812P  
METTL7A  
FEZ2  
LGALS9  
SWAP70  
TMEM176B  
P2RY13  
IRAK3  
GAA  
SLC43A2  
SNX10  
CLN8  
BMP2K  
TFEC  
LY96  
SYK  
BTK  
FMNL2  
FCHO2  
TMEM14C  
LAT2  
ST14  
RNF13  
FGD4  
DPYD  
DNASE2  
TOP1  
BASP1  
SAP30  
CEP170  
SOAT1  
SCIN  
FAM105A  
PTGS1  
DRAM2  
RIN3

CHPT1  
HEXB  
SFMBT2  
SYNGR2  
MS4A4A  
CD300A  
STX6  
STX7  
AP1S2  
GRINA  
THEMIS2  
AP1B1  
FRMD4B  
CAMK1D  
TKT  
PADI2  
CRTAP  
LRP1  
ARRB2  
PEA15  
RAB32  
HCK  
CTTNBP2NL  
PAPOLG  
LRRK2  
DAGLB  
SCIMP  
NUP214  
GSN  
SPINT2  
SKIL  
HIF1A  
PARVG  
TLR5  
CD81  
C5AR1  
DENND3  
CREG1  
SLC40A1  
APPL1  
CD4  
ABHD12  
CYFIP1  
SSH2  
CTNND1  
SHTN1  
LRRC25  
SERPINA1  
CHN2  
PSTPIP2  
CNDP2  
PLSCR1  
ALOX15B  
QKI  
ATP6AP1  
UNC93B1  
TPP1  
CAT

RHOBTB3  
HAVCR2  
NAIP  
INTS10  
SPTLC2  
GPR155  
COMT  
NAGK  
TGFB1  
PTEN  
FGR  
CLEC12A  
CD33  
KLHL5  
ETS2  
IFNGR2  
PLEKHO1  
BEX4  
ZYG  
DAPK1  
PRKAG2-AS1  
SCAMP2  
HSPA6  
ACSL4  
RP11-108M9.4  
SVBP  
IER3  
C1orf54  
RBM47  
ITPR2  
ENTPD1  
SLC31A2  
RTN1  
ST3GAL6  
STK38L  
EPB41L3  
BCAT1  
HMOX1  
CTSL  
ITPR1PL2  
C20orf27  
RNASE2  
FAM96A  
TAX1BP3  
LILRB1  
AP001055.6  
SNCA  
POU2F2  
KLF7  
NLRP3  
PLXNC1  
NDRG2  
MMP2  
PTAFR  
RNF144B  
ADPGK  
FAM110B  
MITF

KIAA1033  
PALD1  
TNFSF12  
MERTK  
ZSWIM7  
BRI3  
FGD2  
IRS2  
JAK2  
VAMP3  
ZNF385A  
EMILIN2  
MANBA  
PRCP  
C10orf11  
HNMT  
ITGAM  
SPECC1  
PKP2  
GALNT2  
LPL  
NAGA  
UBE2E2  
TIMP2  
LACTB  
TCF4  
GPRIN3  
POLD4  
ZNF106  
CD84  
ZEB2  
BAZ2B  
PTPN18  
ERCC1  
CMTM6  
FOXO3  
LAPTM5  
GLIPR1  
SMAP2  
NCF1  
AOAH  
AZIN1  
RNF149  
GNAI2  
RAC1  
PDK4  
MAP3K2  
ZBTB16  
MAT2A  
DCK  
PGLS  
RHOG  
TSPO  
REL  
NCKAP1L  
GRB2  
H2AFY  
TMEM219

SPP1  
COTL1  
FTL  
S100A11  
FAM49B  
HN1  
HSD17B11  
TAOK3  
OSBPL8  
SEC11A  
MTPN  
ITM2B  
ATP1B3  
DHRS7  
MT-ND4L  
SH3BGRL  
PRMT2  
SDCBP  
WASF2  
AP2S1  
RCSD1  
CANX  
CTSD  
ATP6AP2  
ITGB2  
RHOA  
GPNMB  
MT-ND1  
CYBA  
GPX4  
ANXA5  
MT-ND3  
ROCK1  
CLU  
RGS2  
MT-ND5  
CELF2  
MTDH  
ACTR2  
EVI2B  
TUBA1B  
PDZK1IP1  
SLC25A5  
VAMP8  
HSPA1A  
SLA  
TPT1  
FYB  
RPS27  
ARPC1B  
DDX17  
NEAT1  
SERP1  
CD63  
RPS4X  
RGS1  
AC090498.1  
FXD5

XIST  
ARPC3  
MT-ND4  
IL32  
CD2  
RPL17  
CCL5  
HLA-A  
B2M  
CD3D  
EEF1B2  
MALAT1  
MT-CO3  
CD52  
TXNIP  
GZMA  
APP  
TRAC  
MT1E  
DUSP2  
RPS26  
CD3E  
RPL23A  
SOD2  
RPS15A  
RPL21  
HLA-C  
PLIN2  
NNMT  
CST7  
CD69  
PPDPF  
CD3G  
NDUFC1  
ETS1  
CRYAB  
GZMK  
NKG7  
TRBC2  
LCK  
TRBC1  
INSR  
RPL35A  
RPS25  
ITM2A  
CCL4  
H3F3B  
RPL36  
SYNE2  
IFITM3  
IL7R  
TUBA4A  
FYN  
CD96  
FOSB  
CD247  
DUSP4  
GNLY

CD27  
KLF6  
BTG1  
CYB5A  
CRIP1  
LTB  
TPM1  
DDX5  
IL2RG  
SEPW1  
ATP1B1  
ADIRF  
HNRNPH1  
ANXA6  
HLA-DRB5  
ACAP1  
CDC42SE1  
S100A13  
JUNB  
HBA2  
DSTN  
RP11-347P5.1  
CD24  
TNFAIP3  
TIMP1  
C12orf57  
ANGPTL4  
PGK1  
EEF1D  
JUND  
TAGLN2  
SMCHD1  
TSC22D3  
HPCAL1  
CDC42SE2  
ADGRE5  
ITGB1  
DNAJA1  
UBC  
BIRC3  
CREM  
SUMO1  
GYPC  
MYL12A  
RPS27L  
BTG2  
APOBEC3C  
UBB  
RARRES3  
ANXA1  
MT2A  
LYST  
PIK3IP1  
CLEC2D  
RGCC  
LINC00152

9-Sep

SOD1



CALM3  
PDCD4  
KMT2E  
YWHAQ  
CYTIP  
HBB  
OCIAD2  
BUB3  
IER2  
SEC61G  
CD99  
CCNL1  
ICAM3  
RBM8A  
CYCS  
PRDX2  
RNF19A  
ODF2L  
LYST  
CD8A  
CD27  
TTN  
CD8B  
TNFRSF9  
CST7  
RP11-160E2.6  
VCAM1  
LAG3  
CD200R1  
ADTRP  
NKG7  
GZMK  
APOBEC3G  
PTCH2  
TRAC  
CCDC141  
DUSP4  
CCL5  
GZMA  
CD2  
RNU12  
DUSP2  
CD3D  
CCDC64  
CLECL1  
PRR5L  
FTH1  
CCND2  
TNIP3  
FASLG  
RNF19A  
ZNF331  
MCTP2  
CMC1  
NR4A2  
CD3G  
HAVCR2  
TOX2

LIMD2  
SIT1  
ITGA4  
TOX  
MIR155HG  
TRBC2  
SNAP47  
TIGIT  
SLF1  
SLFN12L  
IFNG  
RUNX3  
FAM3C  
RASGRP1  
AC069363.1  
HLA-A  
ATXN1  
BHLHE40  
LBH  
DTHD1  
CRIP1  
CH17-373J23.1  
ARAP2  
IL2RG  
NPIP5  
RP11-386I14.4  
PTPN7  
TRAF5  
TSC22D3  
AC090498.1  
RPL39  
TMSB10  
PTPRC  
SPN  
SIRPG  
WDR74  
DGKH  
EOMES  
FTL  
PDCD1  
LCK  
SRSF7  
CREM  
FUT8  
TXNIP  
SH2D2A  
FNBP1  
NAB1  
VPS37B  
TMEM107  
PYHIN1  
MALAT1  
CD3E  
CDK6  
RPL3  
TRAF1  
SLC38A1  
HLA-F

SUB1  
GTPBP8  
MSI2  
XIST  
PRF1  
LTB  
IL32  
FAM118A  
CCL4L2  
HNRNPLL  
ACAP1  
RAB27A  
TPT1  
RPS18  
CRTAM  
HLA-B  
APMAP  
CHST12  
VIM  
RPL13  
APOE  
FOS  
APOBEC3C  
UBE2F  
RNF213  
CCL4  
SLA2  
WIPF1  
CLEC2D  
BCL11B  
ARHGAP30  
PRKCH  
PLEK  
KIAA1551  
S100A10  
IKZF3  
TBC1D10C  
TMSB4X  
ANXA1  
RPL7  
RPL17  
CD82  
HCST  
PAG1  
DENND2D  
DZIP3  
ITGB2  
FKBP5  
LAT  
TXK  
RPS8  
ITM2A  
NCL  
RPL10  
DUSP1  
ETS1  
ITGAL  
AKNA

RPL8  
TMEM2  
CORO1A  
SMG1  
RGS1  
ASXL2  
TYROBP  
LINC00152  
LINC01116  
PTPN22  
EEF1A1  
CD247  
SYTL2  
ARID4B  
CCL3  
CXCR3  
ZBTB1  
SYNE2  
MBNL1  
ICOS  
SYNRG  
SON  
LINC00649  
RPS2  
ANKRD36C  
RAB8B  
CST3  
CTSW  
STK17B  
EVL  
RPL35  
ATRX  
PRPF4B  
ANKRD36  
GPBP1  
RPS14  
TRBC1  
LYZ  
PARK7  
TRAF3IP3  
GGA2  
SPTAN1  
RPL34  
OTULIN  
RPL36  
GOLGA4  
PRRC2C  
PRPF38B  
DOCK8  
NIN  
SH3KBP1  
ANXA6  
PTPN6  
RPL18A  
GLUL  
TIMP1  
DDX24  
RAC2

ARHGAP9  
NFAT5  
IRF1  
BCLAF1  
RPS3A  
NBEAL1  
HNRNPA1L2  
PTMS  
TRAT1

1-Sep

SCAPER  
HBB  
RHOH  
SRSF5  
RPL11  
SLA  
CBLB  
P2RY10  
PNISR  
NNMT  
RPL32  
HMGN1  
LCP1  
SH2D1A  
IL7R  
RP5-117110.5  
FYB  
ARGLU1  
CEBPD  
IL2RB  
RGS2  
MT-ND6  
SYTL3  
ILF3  
IGFBP7  
RPS15  
NKTR  
DRAP1  
CYLD  
FCER1G  
SURF4  
KIF2A  
SAMD9L  
PSMB9  
SHFM1  
APOC1  
RPS6  
RFTN1  
SMC4  
IRF2  
AKAP9  
TUBA4A  
GPX1  
RPL37A  
MT-ND4L  
NDUFA4L2  
TPR  
SAMD3

C12orf57  
DGKZ  
RPL14  
KMT2A  
GOLGA8B  
RARRES3  
IGKC  
RCAN3  
GCC2  
CRYAB  
RASSF5  
DDX17  
WNK1  
CLDND1  
ITM2B  
NIPBL  
TANK  
TERF2IP  
BOD1L1  
TMEM123  
SRRM2  
PSMB10  
PLIN2  
C1QA  
ITM2C  
ZCCHC11  
VPS13C  
ASH1L  
IFITM3  
ITSN2  
TAF7  
ZBTB38  
CCDC12  
PSTPIP1  
M6PR  
IL16  
BPTF  
PTPRA  
NSD1  
CDK12  
SERPINA1  
HNRNPD  
SRSF9  
JUND  
ADIRF  
CCDC186  
IFI16  
HNRNPA3  
HERC2  
KMT2E  
CHD3  
PCSK7  
TSPYL2  
RBM25  
RBM23  
NELFCD  
MT-ND5  
SRSF2

SFPQ  
MLLT6  
BTG2  
ASCC3  
DDX3X  
AC092580.4  
ICAM3  
PCM1  
GNLY  
SLFN5  
RPL29  
NFKBIA  
BTN3A2  
CCNL1  
BLVRA  
KLF6  
TNFRSF1B  
NOP58  
USP34  
TERF1  
DDX39B  
IGFBP3  
ARL4C  
CD84  
IFNGR1  
ANKRD44  
PAFAH1B1  
PPP4R3A  
PSMA3-AS1  
HNRNPM  
SAMD9  
DSTN  
SNRPN  
TLN1  
RASA2  
S100A9  
MACF1  
KDM5A  
RBL2  
BAX  
G3BP2  
DNAJC1  
RPLP0  
RSRP1  
XRN1  
GNB2L1  
ARPC5L  
SMC5  
LBR  
CNTRL  
TAP1  
NPC2  
CENPC  
ZC3H7A  
PDE7A  
RPS5  
GTF2I  
RHOB

RPS11  
PARVG  
EPC1  
PARP14  
PJA2  
MYCBP2  
RPL5  
BDP1  
HBA2  
DOCK2  
PSAP  
ZNF655  
ZNF292  
WAPL  
APOL6  
STAT3  
SRPRA  
GRN  
CTSB  
TMPO  
ANKRD11  
JUN  
SOD2  
WHSC1L1  
CEBPB  
SENP6  
GOLGB1  
DDIT4  
SETX  
HSPB1  
S100A11  
GPRIN3  
LDHA  
REST  
LGALS3  
RPL22  
FOSB  
PPP1R10  
GAPDH  
GLIPR1  
YBX1  
SAT1  
C10orf54  
PRDX2  
EEF2  
AIF1  
TOMM7  
ISG20  
ANXA2  
PIK3IP1  
RGCC  
S100A6  
HLA-DRA  
TAGLN2  
ZFAND5  
APLP2  
RNASET2  
EIF3E



RAC1  
CITED2  
HLA-DRB5  
GLTSCR2  
RTN4  
PPP1R15A  
TPI1  
FOXP1  
TUBB  
HSP90AA1  
TUBA1B  
CYTIP  
LAPTM4A  
YWHAH  
PPP1CB  
CD63  
GDI2  
ZFP36L2  
GPX4  
ESM1  
SPARCL1  
IGFBP7  
ENPP2  
SPARC  
GNG11  
PLVAP  
SLC9A3R2  
RAMP2  
CD59  
IFI27  
SDPR  
RBP7  
IFITM3  
IGFBP3  
PTPRC  
CLEC14A  
PLPP1  
CXCR4  
ZFP36L2  
ADGRL4  
RGS1  
PRSS23  
FLT1  
MT-CO1  
RNASE1  
TIMP3  
CORO1A  
LAPTM5  
HCST  
CCL5  
TSC22D1  
MGP  
CYBA  
EVL  
CD44  
CD52  
BTG1  
FYB

PABPC1  
CD69  
SRSF7  
CD37  
STK4  
RPS29  
RPL17  
SPRY1  
S100A4  
LSP1  
CD53  
CD2  
CELF2  
SRSF5  
RPS27  
ITGB2  
PNISR  
CYTIP  
KLF6  
SLA  
TNFAIP3  
RGCC  
CRIP2  
SARAF  
TRAC  
OAZ1  
RARRES3  
LCP1  
HMGB2  
GSN  
STK17B  
CD3D  
GZMA  
MT-ND5  
RPSA  
NKG7  
JUN  
HES1  
CST7  
GPSM3  
DUSP2  
PNRC1  
NBEAL1  
CD3E  
AC090498.1  
ELF1  
CD48  
MCL1  
IDS  
DNAJB1  
RPL41  
ID3  
PRRC2C  
CCL4  
EPAS1  
IL2RG  
EEF1B2  
RP11-347P5.1

MT-CO3  
TRBC2  
RNF213  
RAC2  
CAV1  
MT-ND2  
HSP90AA1  
LITAF  
PPDPF  
UCP2  
ZFAS1  
MT-ND3  
ACAP1  
YWHAZ  
AKAP13  
FKBP1A  
EVI2B  
AAK1  
FNBP1  
WIPF1  
RPS21  
EMP3  
FAM49B  
SNHG8  
RSRP1  
GZMK  
CIB1  
ZFP36  
ALOX5AP  
PPP1R15A  
RNASET2  
CCNL1  
POLR2J3  
STK17A  
NFKBIA  
INSR  
CNN3  
FOS  
RGS2  
MT-ND1  
PIK3IP1  
PPP2R5C  
COTL1  
BTG2  
RBM25  
HNRNPA1  
LIMD2  
ADGRE5  
RPS2  
IL32  
CTSS  
FOSB  
ARF6  
REL  
JUNB  
KIAA1551  
SAMSN1  
RPS15A

PIK3R1  
DEK  
RPL36A  
TRBC1  
MT-ND4L  
STAT3  
TAF7  
SH3KBP1  
RBMX  
CD7  
CLEC2D  
RGS10  
TAF1D  
RPL28  
MT-CYB  
NR4A2  
ROCK1  
RBPJ  
GLIPR1  
CTSC  
CRIP1  
SYTL3  
HCLS1  
SMAP2  
DOCK8  
HSPE1  
EVI2A  
CD3G  
LTB  
SRRM2  
APOBEC3G  
BCLAF1  
ARID4B  
MT-ND4  
VMP1  
TRAF3IP3  
GLUL  
BIRC3  
LCK  
ANXA1  
H3F3B  
EIF3A  
EZR  
TYROBP  
MYO1F  
GLRX  
ZEB2  
HLA-DQB1  
MT2A  
RPL10A  
PCSK7  
SERPINA1  
USP15  
TYMP

6-Sep

RPL23A  
EMB  
IKZF1

CD27  
SMCHD1  
IL7R  
PLP2  
DHRS7  
HLA-DQA1  
CD96  
RNF149  
ATM  
HLA-DPB1  
CD247  
CEBPB  
ANKRD44  
AKNA  
TXNIP  
IL10RA  
BIN2  
BBX  
HSPD1  
MYCBP2  
PRDM1  
TRIM22  
RCSD1  
CCNH  
CMC1  
FCER1G  
MGEA5  
CHCHD10  
RNF19A  
ARID5B  
PSMA3-AS1  
HLA-DPA1  
RPS8  
TUBA4A  
LDHA  
PTMA  
PYCARD  
ANXA6  
GBP2  
TSTD1  
OCIAD2  
FOXP1  
MT1X  
LYZ  
CITED2  
YWHAH  
PECAM1  
APP  
AIF1  
NNMT  
SEPW1  
CRYAB  
VIM  
NDUFA4L2  
HBB  
SOD2  
PSMA1  
GNLY

COX7A2  
C9orf16  
TPM3  
EIF2S2  
HBA2  
APOC1  
ATP6V1F  
SNRPB2  
S100A9  
AP2M1  
NDUFB10  
C1QA  
PSMB3  
ERH  
ATP5I  
SUMO1  
SLC25A3  
HLA-DRB1  
TMEM59  
WASF2  
BRK1  
ITM2B  
PSMB1  
OSTC  
MORF4L1  
PSMD8  
NDUFA11  
CD9  
PSMB7  
RAB7A  
IGKC  
LSM3  
SNRPG  
CSTB  
TMEM219  
NDUFB4  
SRP14  
PSMD4  
PSMA4  
NFE2L2  
COX6A1  
UQCRQ  
GYPC  
ATP1B3  
DBI  
A2M  
NDUFB7  
IFITM2  
YWHAQ  
PDIA6  
CLTA  
ROMO1  
BSG  
MRFAP1  
ARL6IP1  
PSMB6  
  
SHFM1

2-Sep

PSMC5  
FIS1

15-Sep

MRPL51  
PPP1CB  
RHOB  
NDUFC2  
COX6C  
METTL9  
DYNLRB1  
ATP5J  
GNB2  
AP2S1  
APOE  
CD99  
PRDX2  
PRDX5  
GNG5  
GABARAPL2  
TMEM50A  
ANXA5  
TMEM230  
RAB2A  
CALR  
CHMP2A  
IFNGR1  
RHOA  
GSTO1  
PPIB  
SH3GLB1  
EID1  
DAD1  
GNAS  
NDUFC1  
LAMP1  
CD63  
KDEL2  
RAB5C  
SKP1  
VAMP5  
COX17  
PSMA7  
MRPL33  
POLR2L  
HLA-C  
TCEB2  
RABAC1  
HSP90B1  
NDUFA4  
SLIRP  
GUK1  
YWHAE  
BCAP31  
ANXA2  
HLA-DRB5  
HLA-DRA  
HLA-DPA1  
HLA-DQA1

HLA-DPB1  
HLA-DQB1  
C1QB  
HLA-DQA2  
C1QC  
LYZ  
MS4A6A  
GPX1  
CST3  
SGK1  
HLA-DMA  
GRN  
NPC2  
HLA-DMB  
CTSH  
MS4A7  
MAFB  
CPVL  
FAM26F  
RNASE6  
KLF4  
GPNMB  
AIF1  
CD68  
ALDH2  
GPR34  
MSR1  
C1orf162  
PHACTR1  
KCTD12  
FCGR2A  
CSF2RA  
LST1  
PKIB  
MS4A4A  
PPT1  
CXCL16  
C3AR1  
FGL2  
IFI30  
CPM  
IGSF6  
SPI1  
OLR1  
VSIG4  
CYBB  
LY86  
MNDA  
SLC1A3  
NCOA4  
PLXDC2  
IL18  
RNF130  
CTSZ  
CSF1R  
ANKRD22  
CD163  
CLEC4E



CSTA  
FCGR1A  
TNFSF13B  
RP11-1143G9.4  
SERPINF1  
CD302  
SLC7A7  
CLEC10A

1-Mar

PLAUR  
LY96  
CLEC7A  
RAB31  
FCGR2B  
OGFRL1  
CD83  
AXL  
CD86  
IRF8  
SLC31A2  
NLRP3  
MFSD1  
TBXAS1  
LILRB4  
CLEC12A  
HLA-DQB2  
CECR1  
IL13RA1  
LGALS2  
RGS18  
FPR3  
NCF2  
BASP1  
TLR2  
SRGAP1  
PILRA  
RAB32  
CCDC88A  
TM6SF1  
LYN  
SDS  
HCK  
PLBD1  
ADAP2  
LILRB3  
ST14  
GCLC  
SLAMF8  
HLA-DOA  
KYNU  
FCER1G  
SAP30  
GPR183  
C1QA  
ATP6V1B2  
PAK1  
IFNGR2  
HLA-DRB1

GNAQ  
CD74  
TYROBP  
MARCKS  
LGALS9  
CEBPD  
C1orf54  
SNX10  
GAPT  
CTSB  
CTSS  
MPEG1  
AP1S2  
NUDT16  
IFNGR1  
LACTB  
HEXB  
CHPT1  
THEMIS2  
SRGAP2B  
PLD4  
CD14  
CD300A  
TREM2  
P2RY13  
CAPG  
DSE  
RGS10  
DAB2  
FCGRT  
GNB4  
MEF2C  
CFD  
FBP1  
RBM47  
LIMS1  
FGR  
BTK  
SIGLEC10  
SHTN1  
ACSL1  
TYMP  
GRINA  
C5AR1  
SLCO2B1  
TCOF1  
KCNMA1  
LRRC25  
FAM105A  
RNF13  
CLN8  
LAIR1  
ALCAM  
NAMPT  
C15orf48  
TNFAIP2  
H2AFY  
SLC8A1

ASAH1  
LPCAT2  
UBE2E2  
PSAP  
CREG1  
GLUL  
ADORA3  
BRI3  
YWHAH  
PSTPIP2  
ITGAX  
NAGA  
UNC93B1  
SCPEP1  
PYCARD  
PABPC4  
TPP1  
DAPK1  
MGAT1  
CD9  
FNIP2  
DRAM2  
SLC11A1  
LGMN  
RGS2  
FMNL2  
ALOX5  
HBEGF  
APOC1  
SRGAP2  
LAT2  
ABHD12  
FCGR3A  
SAT1  
NR4A3  
PRCP  
ATP6V0B  
ATP6AP1  
ALOX15B  
C3  
STX7  
TKT  
ATP1B3  
MRPL3  
RAC1  
ZFAND5  
CD4  
LGALS3  
PICALM  
FTH1  
ATG3  
SKAP2  
LIPA  
CNPY3  
SAMHD1  
HMGA1  
MAP3K8  
FTL

HMOX1  
C10orf54  
SRGAP2C  
IER3  
ATF3  
VMO1  
MEF2A  
HEXA  
SYNGR2  
LAP3  
AOAH  
AKR1B1  
ANXA5  
SDCBP  
AP2S1  
ARRB2  
HCLS1  
SLC40A1  
APOE  
COTL1  
ARL5A  
HERPUD1  
COMT  
SOAT1  
CMTM6  
LTA4H  
ATP6V1F  
SLC43A2  
SLC25A5  
FABP5  
PLEK  
ATP6AP2  
FAM49B  
LPAR6  
PLD3  
RHOG  
PPA1  
MIS18BP1  
RNH1  
AZI2  
PTPRE  
RTN4  
GLIPR1  
JAML  
REL  
VAMP8  
CTSL  
CEBPB  
GDI2  
SNX3  
RHOB  
TUBA1B  
SEC11A  
MT-CO1  
YBX1  
GSTO1  
GPX4  
FKBP5

ACP5  
HSPA1A  
S100A11  
SMAP2  
ANXA2  
AREG  
SH3BGR1  
CYBA  
CTSC  
LAPTM5  
ITGB2  
MALAT1  
ARPC3  
CSTB  
ARPC5  
MT-CO3  
NEAT1  
ARPC1B  
CD63  
RHOA  
OAZ1  
TSPO  
FOS  
RPS27  
MT-ND4  
ITM2B  
CTSD  
MT-ND1  
LGALS1  
RPS26  
IL32  
PABPC1  
CD2  
INSR  
SEPP1  
S100A9  
IGLC2  
ETS1  
RGS5  
CD3E  
TRAC  
RPL23A  
CCL5  
CD3G  
CD3D  
RPS29  
SYNE2  
RPL31  
GZMA  
S100A8  
APP  
HLA-A  
IFITM3  
ITM2A  
LCK  
TRBC2  
BTG1  
CD59

CST7  
ENPP2  
CD7  
CD27  
CD69  
IGKC  
TRBC1  
CLEC2D  
ATP1B1  
ACAP1  
CD96  
GZMK  
LTB  
TUBA4A  
NDUFC1  
CD52  
PPDPF  
DUSP2  
TSC22D3  
IGFBP7  
FYN  
OCIAD2  
RNF19A  
IL7R  
EVL  
MGP  
HBA2  
NKG7  
RGCC  
STK17A  
SYTL3  
HNRNPH1  
CRIP1  
HBB  
ODF2L  
GPX3  
BIRC3  
SEPW1  
DNAJB1  
DSTN  
SEC61G  
ADIRF  
JUND  
SPARC  
CCL4  
IVNS1ABP  
GNLY  
IGFBP3  
KIAA1551  
IL2RG  
ROMO1  
RARRES3  
NDUFA4L2  
BBOX1  
CD24  
MALAT1  
TMSB4X  
CRYAB

KRT18  
FXVD2  
GAPDH  
CMBL  
B2M  
BHMT  
CYB5A  
SRGN  
BTG1  
MT-CO1  
LDHA  
NAT8  
CXCL14  
ADIRF  
MT-ND3  
NEAT1  
BNIP3  
CXCR4  
FTH1  
HLA-E  
ZFP36L2  
HLA-B  
PTPRC  
KRT8  
DDX5  
ANXA4  
MT-CO2  
HLA-C  
MT-ND2  
MT-ATP6  
RGS1  
S100A4  
ALDOA  
MT-ND4  
FTL  
MT-ND1  
MT-CO3  
MT-CYB  
TXNIP  
ARHGDIB  
ENO1  
PDZK1IP1  
LAPTM5  
EVL  
CORO1A  
LGALS2  
ARPC2  
SRSF7  
N4BP2L2  
CD44  
HCST  
PNISR  
FYB  
NNMT  
CD52  
MT-ND5  
CD53  
SH3BGR13

STK4  
CCL5  
CD37  
JUNB  
CD69  
CD2  
JUN  
GMFG  
FXD5  
PRPF38B  
SON  
MCL1  
MIF  
TNFAIP3  
MGST1  
ACTB  
CYTIP  
KLF6  
AKAP13  
RBM39  
ANXA1  
ARGLU1  
LCP1  
GATM  
POLR2J3  
HLA-F  
TMEM176A  
CELF2  
TPI1  
ZFP36  
CD3D  
CCND1  
XIST  
NUPR1  
ELF1  
EEF1A1  
LSP1  
TMEM176B  
STK17B  
CFL1  
ITGB2  
LRRFIP1  
PTMA  
SLA  
ARPC1B  
RSRP1  
IL2RG  
CD3E  
TRAC  
ALDH1A1  
GPSM3  
GZMA  
DUSP2  
DDX24  
CCNL1  
MYL12A  
PRRC2C  
IFI16



CYBA  
SRSF5  
RP11-347P5.1  
RPL7  
ITGB1  
RAC2  
FOSB  
DDX3X  
VAMP2  
WIPF1  
TRBC2  
FNBP1  
RNF213  
PFN1  
TPT1  
RPS28  
MBNL1  
AAK1  
CCL4  
PLIN2  
TMA7  
CD48  
RHOA  
ANKRD12  
NKTR  
CLEC2B  
PPP2R5C  
HMGB2

7-Sep

FKBP5  
BTG2  
RPS6  
H3F3B  
PEBP1  
KMT2E  
CST7  
ATRX  
RPL3  
IDS  
HLA-DPA1  
YWHAZ  
CD99  
SRSF2  
FUS  
DNAJB1  
YWHAB  
HNRNPA2B1  
ARL6IP5  
ARID4B  
RPLP0  
WSB1  
PPP1R15A  
DDX17  
HLA-A  
KIAA1551  
GIMAP4  
EVI2B  
SMCHD1

REL  
TRA2B  
SH3KBP1  
NKG7  
STK17A  
ACTR2  
PIK3IP1  
FOS  
TPM3  
RBM25  
ACAP1  
PCSK7  
ISG20  
SAMSN1  
ROCK1  
LIMD2  
ETS1  
HCLS1  
CTSS  
SYNE2  
CKLF  
MT-ND4L  
SP100  
UCP2  
COTL1  
CFLAR  
HLA-DPB1  
FAM49B  
IQGAP1  
ARF6  
SARAF  
ALOX5AP  
ZFP36L1  
PPP1R2  
GPBP1  
AKAP9  
GZMK  
ITM2A  
RGS2  
CCND3  
CAPZB  
SCAF11  
IRF1  
FAM133B  
GLIPR1  
PRDM1  
CD7  
BCLAF1  
TERF2IP  
TNRC6B  
DOCK8  
GIMAP7  
JAK1  
STAT3  
LCK  
CLEC2D  
GCC2  
RPS4X

CD3G  
CLK1  
MSN  
ARPC5  
PABPC1  
COX7C  
CREM  
RARRES2  
RGS10

6-Sep

EMB  
LGALS1  
C9orf16  
PIK3R1  
SMAP2  
CEBPB  
RAP1B  
MYO1F  
RPS8  
PDCD4  
DAB2  
HLA-DRB1  
LTB  
ADGRE5  
TRBC1  
EVI2A  
GNAS  
SYTL3  
RBPJ  
VMP1  
MYH9  
TSC22D3  
HSPB1  
SF3B1  
TXN  
IL7R  
CTSC  
SF1  
RPL31  
MYCBP2  
FOXP1  
SRRM2  
LITAF  
CARD16  
ATM  
RPL36  
NR4A2  
ANKRD44  
HLA-DQB1  
PRKCH  
PPP1R12A  
IFITM2  
APOBEC3G  
MACF1  
DEK  
RPS15  
IER2  
ODF2L

AKNA  
CD27  
IL10RA  
CD74  
NACA  
ACTR3  
RGCC  
TAPBP  
IKZF1  
EPC1  
SFPQ  
CMC1  
BIN2  
RNF19A  
RCSD1  
PDK4  
MGEA5  
NFKBIA  
GABPB1  
PTP4A2  
GSTP1  
TLN1  
LINC00152  
ABRACL  
S100A6  
YPEL5  
HSP90AA1  
SLC2A3  
CD96  
PSMA3-AS1  
TAOK3  
HLA-DQA1  
PYCARD  
ICAM3  
PNN  
ARHGEF1  
HP1BP3  
CCNH  
IFNGR1  
WNK1  
ORMDL1  
CDC42SE2  
C10orf54  
JMJD1C  
USP15  
TRAF3IP3  
RNPS1  
TRIM22  
RPL35  
TYROBP  
VIM  
PSMB10  
BTN3A2  
RPL11  
S100A10  
PKM  
TUBA1A  
FCER1G

RPS5  
BRD2  
DDX6  
CASP4  
C9orf142  
HNRNPH1

9-Sep

NDUFC1  
RPL37  
RPL8  
RHOG  
PLP2  
GYPC  
RPL26  
FYN  
AES  
PSAP  
BIRC3  
TPM1  
RPL19  
HLA-DMA  
GPX4  
RHOB  
RPS25  
SAT1  
AIF1  
HLA-DRB5  
GNLY  
ESD  
SERPINA1  
LYZ  
NPM1  
HLA-DRA  
RPS7  
C1QA  
RPL22  
HBB  
OCIAD2  
ACAA2  
RPL5  
RPL24  
RPL38  
GPX3  
CST3  
UQCRB  
HBA2  
RPS11  
PPDPF  
RPL23  
UBC  
TMEM59  
LAMTOR5  
RPL36A  
GNB2L1  
TMBIM6  
UQCRQ  
PRDX1  
PFDN5

USMG5  
DSTN  
PRDX6  
SPP1  
MPC2  
OCIAD1  
IGKC  
CUTA  
CNDP2  
COX17  
S100A9  
PSMA4  
ATOX1  
ST13  
PGAM1  
CHCHD10  
SEC62  
APOC1  
C19orf53  
ZNHIT1  
SLC25A5  
NDUFB9  
COX7A2L  
PSMB6  
ENPP2  
SPARCL1  
FLT1  
ESM1  
INSR  
PLVAP  
TIMP3  
SPARC  
A2M  
IGFBP3  
VWF  
GSN  
EPAS1  
PLPP1  
STC1  
NOTCH4  
IGFBP7  
PRSS23  
ADGRL4  
CLEC14A  
PECAM1  
EDNRB  
HSPG2  
COL4A1  
APP  
SPRY1  
RBP7  
SDPR  
PLPP3  
CD59  
BTNL9  
MGP  
RNASE1  
INHBB

SLC9A3R2  
AQP1  
RAMP2  
TCF4  
GNG11  
ENG  
EFNB2  
ANGPT2  
CLDN5  
TSC22D1  
IFI27  
ADGRF5  
ITGA6  
ARHGAP29  
SPTBN1  
COL4A2  
PODXL  
HES1  
BCAM  
PTPRB  
FAM84A  
EGFL7  
ESAM  
NFIB  
GJA1  
HYAL2  
LIFR  
PDGFD  
RAMP3  
F8  
CALCRL  
SEC14L1  
TM4SF1  
CDH13  
APOLD1  
KCNE3  
CD93  
CRIP2  
EMCN  
GRB10  
EMP1  
TMEM204  
LDB2  
FSTL1  
PCAT19  
CD34  
ITGA1  
EFNA1  
NRP1  
CDH5  
FCN3  
TMEM88  
UACA  
KDR  
VWA1  
CA2  
MMRN2  
F2RL3

ID3  
WWTR1  
DOCK9  
S1PR1  
CAV1  
PTRF  
OSBPL1A  
FILIP1  
MTUS1  
CX3CL1  
TSPAN13  
SMTN  
IGFBP4  
SORBS2  
DLL4  
HTRA1  
CRIM1  
COL8A1  
MAGI1  
NTN4  
LAMC1  
JAG1  
COL15A1  
TMEM47  
TSPAN7  
SLCO2A1  
IDO1  
RAPGEF5  
NPDC1  
TMEM150C  
CNN3  
PINK1  
UNC5B  
TJP1  
MYO6  
CYR1  
S100A16  
PALMD  
TM4SF18  
TMTC1  
LAMA4  
PLXND1  
PPFIBP1  
PTPRK  
FAM167B  
PLK2  
NOSTRIN  
COX7A1  
TIE1  
CXorf36  
ANKRD26  
THSD7A  
FZD4  
SULF1  
NID1  
GAS6  
HEY1  
TNS2



DOCK6  
LIMCH1  
DKK3  
ECSCR  
MATN2  
ARL15  
RPS6KA2  
PTPRG  
EMP2  
ROBO4  
FAM107A  
KCNN3  
HES4  
FGFR1  
GALNT15  
SASH1  
ANGPTL2  
LNX1  
ACVRL1  
LAMB2  
ECE1  
MECOM  
MYCT1  
GALNT18  
CAV2  
ERG  
TMEM255B  
LRRC8A  
PCDH17  
SOX18  
JAG2  
PTPN14  
DYSF  
ITIH5  
NCKAP1  
TMEM233  
GPIHBP1  
LAMA5  
MPZL2  
PREX2  
RBMS3  
NUAK1  
SCARF1  
PXDN  
LAMB1  
IL3RA  
DPYSL3  
BTBD3  
RASIP1  
PDZD2  
HOXD9  
CMTM8  
MPDZ  
PLXNA2  
ACE  
EVA1B  
FOLH1  
IPO11

HIF3A  
LRRC32  
PLS3  
RAPGEF4  
PLEKHG1  
JAM3  
GAS2L1  
TANC1  
PIK3R3  
ABCG2  
ITGB5  
MYO10  
AFAP1L1  
MCF2L  
SHE  
HECW2  
LIMS2  
EML1  
SEMA3F  
FGD5  
RAI14  
BOC  
RAPGEF3  
HOXD8  
PLD1  
FLT4  
GPR4  
SPRY4  
COL18A1  
CDC42BPA  
ZNF704  
ATOH8  
GRAMD3  
JUP  
SERPINE1  
LAYN  
ACKR3  
FNBP1L  
CALD1  
MYO1B  
FKBP9  
MCAM  
TNFRSF4  
PLLP  
PVRL2  
EHD4  
RASGRP3  
MGLL  
TACC1  
ITPRIP  
NOTCH1  
SYNPO  
MGST2  
MEF2C  
HEG1  
RPGR  
RAB13  
TSPAN12

GNAI1  
SHROOM4  
SERPINI1  
FERMT2  
PTPRM  
PPIC  
ITGA5  
MLLT4  
EPB41L4A  
A4GALT  
KIAA1147  
IFITM3  
TSPAN15  
TTC28  
ARHGEF10  
FRY  
RAPGEF2  
SIPA1L2  
TGM2  
MAP3K6  
CYR61  
FAM101B  
BAIAP2  
APLP2  
CDC42EP1  
LIMA1  
SNCG  
FAM198B  
PTP4A3  
CD9  
ITGB1  
ARHGEF12  
PON2  
NGFRAP1  
TIMP2  
SEPW1  
SCARB1  
RDX  
OAZ2  
TGFB2  
IL4R  
THBS1  
LMO2  
YES1  
IVNS1ABP  
CSGALNACT1  
ACACB  
TMCC3  
TNFAIP8L1  
PKIG  
NETO2  
YWHAH  
F2R  
FNDC3B  
LMCD1  
REEP3  
DGKH  
RBMS2

STOM  
ARHGEF7  
GFOD2  
CTGF  
PROS1  
FSCN1  
ICAM2  
PDLIM1  
CTTN  
ADIPOR2  
RGCC  
RASAL2  
VAMP5  
NFIA  
CDC42BPB  
CDC42EP3  
MLEC  
TNFAIP1  
BCAP29  
RPL41  
MYO1C  
S100A13  
SERPINB6  
CLIC4  
TINAGL1  
TJP2  
DEPTOR  
TP53I11  
KIAA0355  
RPS27  
ID1  
HDAC7  
WBP5  
SWAP70  
ZEB1  
MARCKSL1  
GOLIM4  
PGM2L1  
LHFP  
CYB5R3  
SERPINH1  
TMEM184B  
SH2D3C  
SEC62  
KLHL5  
LXN  
ELK3  
LEPROT  
EPHX1  
PRKCDBP  
PHACTR2  
RPS2  
SH3D19  
RPL10  
FAM213A  
HEBP1  
IL6ST  
AKT3

NEAT1  
SH3BP5  
BMPR2  
RPL13  
GIMAP8  
SLC44A2  
PTK2  
CALU  
ADD1  
RPS29  
RPL13A  
RPL28  
RPS15A  
ABLIM1  
PTTG1IP  
CD81  
THEM6  
RPL23A  
CCPG1  
CPNE2  
CDA  
NCOA7  
MED13L  
DHRS3  
FKBP1A  
CCDC85B  
B3GNT5  
RPS18  
TMCO3  
HIPK2  
KLF9  
RFK  
CTTNBP2NL  
RPLP2  
RPL39  
XAF1  
CD46  
GBP4  
FN1  
DSTN  
EHD2  
RHOB  
ASAP1  
C10orf10  
RPL21  
RPS19  
RPL26  
PIK3C2A  
RPS12  
RHOC  
EEF1A1  
ADM  
CTSL  
RPS3  
RCN2  
CAPZA2  
LUZP1  
NEDD9

MAP4  
CD151  
RPL27A  
EXOC6  
YBX3  
RPL18A  
MTRNR2L8  
RPS27A  
TSPAN4  
PAM  
RPLP1  
PTPN12  
RPL31  
RABGAP1  
GNAS  
RIN2  
SLC27A3  
ITM2B  
HSP90B1  
HLA-E  
DUSP6  
ARHGAP5  
RPS14  
ATXN3  
RPL19  
RPL37  
CTNNA1  
WARS  
RPL30

10-Sep

CALCOCO2  
LMNA  
AAMDC  
GFOD1  
PPM1F  
SERINC3  
CTNND1  
ROCK2  
CTNNB1  
TNS1  
PTPRC  
ARHGAP18  
PLOD1  
FAM43A  
NASP  
RPL12  
GINM1  
IFITM2  
SNRK  
RPS24  
MAPK3  
RPS3A  
ARRDC2  
TCEAL4  
RPL10A  
XIST  
RPS21  
RPL11

RPS25  
RPS15  
RPL6  
RGL2  
ADGRG1  
VGLL4  
PEA15  
INPP1  
ITPRIPL2  
KTN1  
FRMD8  
RPL34  
RGS3  
WDR60  
CYSTM1  
RPL32  
SLK  
FYN  
RPS16  
CCDC50  
RPS8  
COPS8  
NPTN  
HMBOX1  
RPL35A  
SRP14  
SLC1A5  
RPS23  
CDC37  
TRIOBP  
CD40  
CRK  
MAP4K4  
RPSA  
ACTN4  
SYPL1  
RPS6  
GIMAP7  
RGS1  
MXD4  
MPZL1  
RP11-553L6.5  
CXCR4  
NAA38  
NUCB2  
FAU  
ABL2  
GIMAP6  
BST2  
EDEM3  
CD63  
LRCH1  
EPS8  
RPS17  
RPS20  
VIM  
RPL35  
RCN1

TBC1D15  
PDLIM5  
RPS4X  
FEZ2  
RAC1  
TRIM56  
RRBP1  
POMP  
RPL14  
NDRG2  
DYNC1LI2  
CORO1A  
FAM214A  
RPS7  
ICA1  
RPL3  
TAX1BP3  
DHRS7B  
SLC44A1  
RSU1  
GRN  
IFI6  
ZBTB16  
RPL38  
PRDX1  
LAMP1  
FNIP2  
RPS28  
LAPTM4A  
QKI  
ZFP36L2  
TMEM245  
RPL15  
ZFYVE21  
RPS26  
RBMS1  
BTG1  
MTRNR2L12  
GNAI2  
ASPH  
MYL12B  
HCST  
RPS13  
ABCG1  
TNFSF10  
RPL7  
RNF115  
GPX3  
PXN  
LRMP  
RPL36  
MALAT1  
BCAP31  
PLEKHA1  
HSPB1  
JMJD1C  
RALB  
CD44



RPL9  
SH3GLB1  
DPYSL2  
S100A4  
RPLP0  
TMOD3  
ARL2  
TMSB4X  
CLCN3  
PARP14  
RPS10  
CLSTN1  
CEP68  
SECISBP2L  
PARVB  
TUG1  
RPL18  
PSMB5  
UBE2J1  
VIMP  
RTN4  
FCGRT  
USP34  
LPP  
ZFYVE16  
FYB  
SDF4  
RPL36A  
MIR4435-2HG  
CAMTA1  
DNAJC3  
RAB11A  
RPS9  
ZBTB20  
ERLEC1  
TMEM30A  
AP1S2  
DOCK4  
CD2  
CYTIP  
QSOX1  
IFNGR1  
ELMO1  
ATOX1  
GABARAPL2  
NFIC  
NDUFA12  
RPL27  
CD69  
RAB6A  
CD37  
EID1  
EIF4G3  
C12orf57  
UBA52  
CELF2  
PTMS  
PML

PICALM  
RPS5  
TMEM50B  
APOL3  
ADAM9  
LINC00657  
ARGLU1  
SCARB2  
ABI2  
RPL37A  
CLTC  
CD52  
RPL7A  
TSPAN14  
ADAM10  
RPL29  
RABAC1  
C5orf24  
FDPS  
LSP1  
RPL5  
AHNAK

2-Sep

MAGED2  
GIMAP4  
RPL8  
MAGT1  
UXS1  
TRAC  
ZFHX3  
CALR  
UTRN  
AES  
MACF1  
NCOA3  
SLC2A3  
LAPTM5  
CCL5  
TM9SF2  
KLF3  
CHMP3  
GALNT1  
RPL4  
HNRNPA1  
MIDN  
MBNL2  
IFNAR1  
CD3D  
TPT1  
GNB2L1  
RPL24  
TMEM50A  
CPD  
SLA  
HACD3  
VPS37A  
BSG  
ACTB

SLC39A10  
SERINC1  
PKN2  
HLA-B  
LCP1  
PIIB  
GZMA  
RPS11  
ADD3  
TMEM59  
DYNC1I2  
SLIRP  
TMEM165  
BAZ2B  
ITGB2  
STK4  
RFC1  
MRPL33  
RILPL2  
RAPGEF1  
FMNL3  
CD48  
COX17  
CD3E  
IL2RG  
MT-ATP6  
CAPN2  
MT-CYB  
C1orf54  
KLF7  
UVRAG  
GUK1  
ENTPD1  
DYNLL1  
EIF1  
NKTR  
PRMT1  
BNIP2  
NCK1  
CYBA  
RP11-347P5.1  
RPL23  
AFF1  
COX5B  
GNAQ  
TAGLN2  
EFCAB14  
DENND3  
DAD1  
GNB1  
PDIA6  
ACAP1  
ITGAV  
IFITM1  
PCMTD1  
TM9SF3  
RAC2  
LMAN1

DUSP2  
ARF1  
KCNQ1OT1  
CST7  
OAZ1  
PRKAR1A  
RAB2A  
EVI2B  
DDIT4  
CAPNS1  
PDIA3  
CPM  
ATP1B3  
TRBC2  
GIMAP1  
AFF4  
EVL  
WASF2  
GNB2  
TMEM109  
FRYL  
STK17B  
NFE2L2  
GTF2I  
RAB5C  
CALM1  
CD99  
SPAG9  
UCP2  
CD3G  
PABPC1  
OS9  
RARRES3  
LITAF  
RPL17  
ANKRD11  
NPM1  
ISG15  
SYNE2  
CD53  
CANX  
RSF1  
EVI2A  
TNFAIP3  
TRBC1  
SAMSN1  
FTH1  
GPSM3  
TRAM1  
ETS2  
NKG7  
CCL4  
EMB  
LIMD2  
CD7  
STK17A  
SYTL3  
NR4A1

LTB  
ALOX5AP  
RGS10  
MT2A  
FABP5  
TRAF3IP3  
EEF1B2  
GLIPR1  
COTL1  
IL32  
DOCK8  
BIRC3  
BIN2  
IKZF1  
MSN  
NACA  
EEF1D  
LCK  
PPDPF  
GZMK  
BTG2  
RGS2  
RPL22  
MYO1F  
IL10RA  
ADGRE5  
PNRC1  
IL7R  
PIK3IP1  
FAM49B  
APOBEC3G  
CD96  
RPL36AL  
EMP3  
SARAF  
DNAJB1  
TSTD1  
HMGB2  
SH3BGR13  
MYH9

6-Sep

CLEC2D  
PIK3R1  
H3F3B  
CD27  
FTL  
PFDN5  
LY6E  
NBEAL1  
CRIP1  
AKNA  
ZFAS1  
HLA-DQA1  
ATP5G2  
AC090498.1  
RNASET2  
LDHB  
TOMM7

COX7C  
PPP2R5C  
RCSD1  
ICAM3  
SRSF7  
SLC25A6  
TAF7  
SH3KBP1  
SNHG8  
SMAP2  
BTF3  
TUBA4A  
ANXA1  
MT1X  
RGS5  
WIPF1  
TYROBP  
GLUL  
GAPDH  
HMGN2  
NAP1L1  
NR4A2  
AAK1  
FCER1G  
SERPINA1  
CITED2  
DUSP1  
JUN  
HCLS1  
ATP5L  
LEPROTL1  
ANKRD44  
PRPF38B  
TXNIP  
CCNH  
ANXA6  
SRGN  
CST3  
EEF2  
EZR  
COMMD6  
ENO1  
FNBP1  
IDS  
HLA-DQB1  
CMC1  
EIF3H  
PLP2  
HLA-DPB1  
FOS  
JUNB  
NNMT  
HLA-DRB1  
PRR13  
MCL1  
ZNF90  
MZT2A  
GLRX

GLTSCR2  
C9orf142  
AIF1  
EIF3E  
REL  
YPEL5  
NPC2  
RPL22L1  
ADIRF  
EIF3M  
EIF3L  
EIF4A2  
LYZ  
VAMP8  
ARID5B  
SNRPD2  
ZFP36  
ARF6  
OCIAD2  
CYCS  
CIB1  
HIGD2A  
TYMP  
RTKN2  
FOXP3  
AC002331.1  
TIGIT  
TBC1D4  
TNFRSF18  
IL2RA  
BATF  
CTLA4  
LAIR2  
AC133644.2  
PMAIP1  
IL32  
LTB  
ICA1  
SLAMF1  
TNFRSF4  
HPGD  
CARD16  
ICOS  
TRAC  
BTG3  
CD27  
S100A4  
CORO1B  
RP11-347P5.1  
SELL  
UGP2  
ARID5B  
STAM  
SAMSN1  
CD79B  
BIRC3  
ENTPD1  
CD2

TNFRSF9  
GBP2  
RGS1  
UCP2  
PHTF2  
CLEC2D  
CTSC  
SPOCK2  
RP11-138A9.1  
TSC22D3  
P2RY10  
CD3D  
NCK2  
IL2RG  
AC016831.7  
PBXIP1  
ISG20  
DNPH1  
TRBC2  
PRDM1  
PIK3IP1  
PHLDA1  
SKAP1  
CYTIP  
DUSP4  
FYB  
RPS26  
PIM2  
ARPC1B  
BTG1  
LINC00152  
HLA-A  
LCK  
SIRPG  
ARHGDIB  
RP11-138A9.2  
ACTB  
ANXA1  
CCL5  
KLF6  
CCNG2  
GATA3  
TNFAIP3  
GZMA  
DUSP10  
STAT3  
MIR4435-2HG  
USP15  
IPCEF1  
GADD45A  
CD3E  
ACP5  
RORA  
GCHFR  
CD7  
ICAM3  
ARL6IP5  
RAC2



FAM129A  
NKG7  
GBP5  
CCL4  
STK17B  
ITM2A  
PTPRC  
GMFG  
CCNI  
CALM3  
PHACTR2  
GLRX  
TRBC1  
SRSF7  
FCMR  
CYCS  
C9orf16  
CD44  
LAT  
RASGRP1  
ZBTB38  
WHSC1L1  
GZMK  
TNFRSF1B  
IQGAP1  
PELI1  
ANAPC16  
UBE2D2  
CD53  
HSPA8  
ALOX5AP  
CREB3L2  
RHOH  
CASP1  
TYROBP  
CLPP  
HTATIP2  
BUB3  
EVI2A  
CD63  
DDX24

6-Sep

GLUL  
EPSTI1  
SLA  
CHST11  
CLIP1  
RSBN1  
RAP1A  
CEBPD  
GALM  
RHBDD2  
IL10RA  
AKIRIN2  
GSTP1  
NABP1  
GIMAP4  
RAB9A

GIMAP7  
ZNF292  
PPM1G  
RNF145  
CST3  
CDV3  
FTH1  
FCER1G  
NR3C1  
DEF6  
SERPINA1  
CLEC2B  
IFNGR1  
WNK1  
IFITM3  
BCL2  
ZC3H7A  
RGS2  
DSTN  
RHOB  
CRYAB  
RNASET2  
CEBPB  
CTSB  
HSD17B11  
GRN  
FTL  
CMC1  
CANX  
SOD2  
LITAF  
AIF1  
ANXA2  
LYZ  
NNMT  
NDUFA4L2  
CD99  
ANXA5  
SDCBP  
FCN1  
LST1  
CSTA  
IL1B  
VCAN  
S100A12  
LINC01272  
MS4A7  
CFP  
BCL2A1  
SPI1  
SLC11A1  
LILRB2  
C5AR1  
CLEC12A  
CLEC7A  
NCF2  
LILRA5  
MPEG1

APOBEC3A  
CTB-61M7.2  
FPR2  
C19orf38  
CD300E  
CYP1B1  
KCNE1  
LILRA1  
CFD  
EREG  
GPBAR1  
FPR1  
PILRA  
HCK  
AQP9  
FGR  
KLF4  
PLAUR  
CLEC4E  
RGS18  
AIF1  
CPPED1  
NAMPT  
IFI30  
CYBB  
SLC7A7  
IRAK3  
AP1S2  
FCER1G  
MAFB  
S100A9  
SLC31A2  
CTSS  
LILRB3  
VNN1  
ADGRE2  
LYN  
CLEC4A  
TKT  
C1orf162  
CEACAM4

1-Mar

SULT1A1  
STX11  
MTSS1  
GCA  
ABHD5  
TREM1  
RP6-159A1.4  
ARL4A  
FAM26F  
LRRC25  
MNDA  
KYNLU  
LYZ  
DUSP6  
RNF144B  
RP11-1143G9.4

S100A8  
TYROBP  
STXBP2  
CD55  
SERPINA1  
TCF7L2  
TNFSF13B  
ASAH1  
MXD1  
CD68  
IRS2  
FAM49A  
ASGR1  
CD302  
ZEB2  
LGALS2  
MTMR11  
CD36  
POU2F2  
COTL1  
RAB31  
LILRA2  
FGL2  
LRRK2  
ARHGEF40  
NUDT16  
PHACTR1  
THBS1  
C9orf72  
NAAA  
SAT1  
RGS2  
ETS2  
SCIMP  
LINC00936  
CEBPB  
C10orf54  
FTH1  
PYCARD  
MTPN  
LGALS9  
LY96  
CD163  
TYMP  
ZFAND5  
FCGR2A  
BRI3  
CNIH4  
CEBPD  
RNF130  
FTL  
PSAP  
FAM110A  
H3F3A  
PRAM1  
LTA4H  
CST3  
MS4A4A

PTPRE  
HBEGF  
UPP1  
GLUL  
PGD  
IGSF6  
AGTRAP  
TIMP1  
NFKBIZ  
CD83  
MT-CO1  
RIPK2  
RILPL2  
NUP214  
KCTD12  
SNX10  
GRINA  
CSF3R  
FAM45A  
ITGAX  
ACSL1  
WARS  
S100A6  
CSGALNACT2  
CMTM6  
NEAT1  
OAZ1  
ZNF281  
TLR2  
NLRP3  
FGD2  
MAPKAPK3  
CPVL  
CD300A  
ATP6V1B2  
SERPINB1  
S100A4  
ATG3  
RNF149  
RNASE6  
SMAP2  
TRIB1  
PRELID1  
TNFAIP2  
RASGEF1B  
NPC2  
MEGF9  
CASP1  
HLA-DRB5  
THEMIS2  
IL1R2  
LILRB1  
PTEN  
CALM2  
DDX21  
CARD16  
CD14  
EVI2B

TLR4  
CD86  
HLA-DQA2  
P2RY13  
PLBD1  
S100A11  
SLC43A2  
SAMSN1  
THBD  
TBXAS1  
UBE2R2  
CTSH  
FAM65B  
H2AFY  
UBE2D1  
SOD2  
JAML  
SRGN  
BLVRB  
BCAT1  
BID  
MT-CO2  
SMCO4  
TNFRSF1B  
CXCL16  
SERP1  
ARRB2  
RNF13  
CXCL8  
SCPEP1  
RHOG  
MS4A6A  
CHPT1  
CXorf21  
PTPN6  
TALDO1  
GAPT  
SIGLEC10  
SELL  
TMEM167A  
VAPA  
PRKCB  
AKIRIN2  
HLA-DRA  
AZI2  
ARPC3  
RHOB  
VNN2  
VMP1  
PKP2  
SNX2  
IER3  
PELI1  
EMP3  
SLC25A37  
IFNGR2  
TSPO  
CD48

GRN  
GDI2  
LGALS3  
BTK  
DAPK1  
APLP2  
VAMP5  
ALOX5  
NINJ1  
TES  
SKAP2  
PGLS  
CECR1  
CUX1  
ANXA5  
FOS  
RPS9  
CYBA  
IRF8  
HSD17B11  
C3AR1  
LACTB  
NBPF14  
GSTP1  
GPX1  
MAP3K8  
SLC36A4  
AREG  
DRAM2  
ARPC5  
MGAT1  
ATP6V0D1  
IFNGR1  
VPS35  
SPG21  
PLEK  
KLF2  
FCGR3A  
PABPC1  
VASP  
GNAQ  
MBD2  
HSBP1  
FBP1  
SAP30  
GNAI2  
RAB10  
STK17B  
TCIRG1  
MT-CO3  
ATP6V0B  
LY86  
CCDC88A  
SNX3  
GLIPR1  
HMOX1  
NUMB  
WDR26

RTN4  
MFSD1  
ARPC1B  
METTL7A  
ZNF706  
SNX18  
BACH1  
SDCBP  
SRGAP2B  
CNPY3  
ATP1B3  
DICER1  
CAPNS1  
ACTB  
CTSB  
CHP1  
LIMS1  
HN1  
FKBP5  
SELPLG  
MPHOSPH6  
PAG1  
C7orf73  
ACTR2  
PABPC4  
ZBTB16  
HACD4  
RHOA  
SLC25A6  
XRN2  
DUSP1  
C4orf48  
C14orf2  
RGS19  
KIAA1033  
IFITM2  
SH3BGRL  
PCBP1  
FGD4  
ARPC2  
PLAC8  
GSTO1  
ZCCHC6  
SH3BGRL3  
GMFG  
FNIP2  
LGALS1  
GNG5  
RAP1A  
OAS1  
WAC-AS1  
AHR  
SOCS3  
LAMTOR4  
LRRFIP1  
HCLS1  
YBX1  
AP2S1



NR4A1  
ANXA2  
PFDN5  
EIF1  
MYO1G  
BASP1  
NAP1L1  
MCL1  
GIMAP2  
ABRACL  
ABI3  
BLOC1S1  
SLC8A1  
MT-ND4  
IL32  
RGS1  
HLA-A  
MT-ATP6  
CHMP1B  
SLC25A5  
CD37  
NACA  
VAMP8  
EVI2A  
CD3D  
ITGB2  
CTSC  
RPL31  
SLC35E3  
CD52  
LAPTM5  
LCP1  
CCNI  
CD2  
FYB  
CYTIP  
MT-ND1  
RPL23A  
CD3E  
GZMA  
CCL5  
TRAC  
CST7  
TRBC2  
RPS29  
RPS3  
SYNE2  
RPL3  
CD69  
CD3G  
ETS1  
IGHA1  
LCK  
ITM2A  
TRBC1  
MALAT1  
CLEC2D  
HSPA1A

CD7  
RPS26  
ACAP1  
STK17A  
GZMK  
OCIAD2  
PIK3IP1  
RPSA  
CD96  
CD27  
RPLP0  
DUSP2  
PRDM1  
CCL4  
IL7R  
HMGB1  
IGKC  
PRKCH  
C12orf57  
PIK3R1  
EVL  
GYPC  
SYTL3  
AAK1  
CD99  
C1QA  
ODF2L  
KIAA1551  
RARRES3  
IL2RG  
JUN  
SRSF7  
HBB  
LDHB  
APOBEC3G  
NKG7  
RNF19A  
CMC1  
RGCC  
EMB  
HILPDA  
EGLN3  
BNIP3  
LINC01320  
CCND1  
RARRES2  
VEGFA  
ERRFI1  
ADM  
CA9  
NUPR1  
NOL3  
MGST1  
CP  
PLOD2  
LOX  
CA12  
CMBL

KRT8  
EDN1  
TFPI  
IRX3  
NPTX2  
TCEA3  
AK4  
ADSSL1  
P3H2  
MAOB  
BHMT  
FSTL3  
EMX2  
UGT2B7  
ANG  
CDK18  
ENPP3  
FBXO17  
RP11-14N7.2  
BICC1  
RP1-60O19.1  
KISS1R  
ZNF395  
RP11-11N9.4  
PCOLCE2  
FABP6  
P4HA2  
CDCA2  
EDIL3  
MAPT  
SPINK13  
GALNT14  
CDH2  
STC2  
BACE2  
ARSE  
BHMT2  
SLC22A2  
FMO2  
SPAG4  
RASSF6  
RP11-798K3.2  
CLEC18A  
SLC2A1  
SOX4  
ANGPTL4  
CXCL14  
CD24  
SLC3A1  
FAM13A  
ASS1  
PROS1  
CKB  
NR1H4  
RBPMS  
HSF4  
MT3  
C14orf105

TMEM91  
CRNDE  
KRT18  
ENPEP  
SLC39A14  
BHLHE41  
SEZ6L2  
SEPP1  
ALDOC  
PFKP  
DPCD  
GATM  
TMEM176A  
SSPN  
SLC37A4  
FOLR1  
AEBP1  
MGLL  
PHLDA3  
P4HA1  
SDC2  
FHL1  
WFDC2  
ALDH1A1  
NMB  
EGFR  
C1S  
ATP1B1  
EFEMP2  
TMEM45A  
DIXDC1  
CAV1  
C1orf186  
C19orf33  
NDRG1  
SERINC2  
INSIG2  
PDLIM1  
CAV2  
WDR34  
C1R  
PMP22  
HSD3B7  
TMEM176B  
CALD1  
GPRC5C  
S100A16  
MYL6B  
RRAD  
MIR4458HG  
SNHG19  
PDZK1IP1  
AKR1C3  
PRDX4  
ENO2  
CLU  
NDUFA4L2  
CCL28

KCTD3  
TMEM37  
NT5C3B  
PGRMC1  
CFAP36  
S100A13  
FAM213A  
NNMT  
CRYAB  
YBX3  
EIF4EBP1  
PDK4  
C10orf10  
FARP1  
CYB5A  
NEK6  
TRIP6  
PDZK1  
EPB41L4A-AS1  
SMPDL3A  
PRKCDBP  
CNN3  
SPINT2  
FAIM  
SLC16A3  
TMEM27  
HSBP1L1  
CRYZ  
HNMT  
PLEKHA1  
IMPA2  
DOC2A  
HPCAL1  
PMM1  
CD151  
RP11-798M19.6  
ADIRF  
MAP3K13  
GPX3  
PTGR1  
TGM2  
DARS  
FAM134B  
RPF2  
GADD45A  
BLVRB  
RAB13  
MT1F  
SHMT1  
MXI1  
UGDH  
FAHD1  
MT1X  
TSPAN12  
GATM-AS1  
SCCPDH  
RASSF4  
BNIP3L

KIF1BP  
CCNB1IP1  
DEFB1  
SMIM3  
TMSB4X  
SLC25A37  
CES4A  
VKORC1  
SPP1  
POLD2  
ANXA4  
PLIN2  
TPM1  
C5orf46  
B2M  
SPATS2L  
PPP1R16A  
EGR1  
SERPING1  
KHK  
ENO1  
STC1  
LDHA  
BOD1  
RCN1  
PIGP  
BEX2  
ESD  
AK2  
PLA2G16  
IGFBP4  
C16orf13  
GCSH  
RBP5  
MIF  
FXD2  
ABCA1  
POLR2H  
ALDH3A2  
SLC39A1  
LGALS3  
RHOB  
TSC22D1  
TMEM205  
IGFBP3  
BCKDK  
TMCC1  
PGRMC2  
ERO1A  
UBR4  
CYR61  
MRPS18B  
ARPC1A  
RAB34  
PTTG1IP  
DAB2  
RNASET2  
FAM162A

LINC00998  
SOCS3  
MORF4L2  
CISD1  
LRRC41  
HCFC1R1  
CTHRC1  
TNIP1  
WRB  
PGK1  
SOD2  
ZFAS1  
CDKN1A  
ACTN1  
PCBD1  
ERGIC1  
VIM  
ALDOA  
GAPDH  
CERS2  
CRYL1  
POLR2I  
C5orf15  
RNF187  
TPI1  
WDR60  
NFIA  
HLA-B  
RPLP0  
NDUFC1  
VDAC1  
PKM  
SERPINE2  
LAPTM4A  
SNHG8  
RBM47  
ARL1  
NFIC  
KDSR  
CYB5R3  
RPS5  
AIG1  
TIPIN  
FLOT1  
MT2A  
PEBP1  
ODF3B  
SNX10  
MT1E  
IFITM3  
NDUFS4  
SYPL1  
APEX1  
NDUFB4  
MRPS33  
EBPL  
MGST3  
SELM

CNDP2  
HES1  
SEC61G  
RPL36  
DDIT4  
MRPL23  
PDCD5  
NDUFA5  
RPS8  
PCNP  
ST13  
HSPB1  
FUNDG2  
SNRPE  
SRGN  
TCEAL4  
STOML2  
OCIAD2  
MYC  
CEBPD  
GPI  
YWHAE  
MMP24-AS1  
HLA-C  
ZBTB20  
VDAC2  
TNFSF10  
RPL7  
TOMM20  
S100A10  
PHPT1  
TMEM123  
EIF4B  
RPS27L  
PERP  
PLSCR1  
PSMC1  
CFDP1  
NENF  
ACTB  
RPL24  
ACAA2  
KCNQ1OT1  
DUSP23  
CAMLG  
UBC  
FTH1  
PRDX6  
RPL9  
TUBB  
SERPINE1  
AQP3  
RAD23A  
ZFAND5  
ATF3  
TMEM14C  
SLC17A3  
NPM1



TBCA  
GSTP1  
FOXO3  
NELFE  
RSL1D1  
CHCHD10  
PGF  
ATF4  
RSL24D1  
RPL18  
RPS19BP1  
RPL18A  
RPL5  
RPL3  
IGHA1  
BTF3  
FBL  
HSP90AB1  
ZNF90  
MZT2A  
PTPRC  
RPS4X  
MRFAP1  
SERPINA1  
MZT2B  
GLRX  
EIF3E  
HLA-A  
RPL8  
NACA  
RPL41  
LSM5  
RPL11  
PGAM1  
RPL10  
ARHGDIB  
RPL22  
RPS6  
P4HB  
DUSP1  
TIPARP  
EEF1A1  
NDUFS5  
BTG1  
CCT4  
MALAT1  
EEF2  
ANXA2  
RTN4  
TXN  
RPS2  
CEBPB  
RPL36A  
TAF1D  
S100A4  
RPS13  
ATP5E  
CXCR4

HLA-E  
TPT1  
RPS28  
CD63  
ZFP36L2  
RPS18  
TMSB10  
RGS1  
GLTSCR2  
RPL35A  
RPL13  
RPL38  
RPL34  
CORO1A  
RPL37  
HCST  
HSD17B7  
IER2  
LAPTM5  
UQCRH  
EZR  
CFL1  
CITED2  
GMFG  
RPS21  
FYB  
CD74  
COX7C  
SLC25A6  
RPL31  
SH3BGRL3  
RPS25  
ARPC2  
RPL6  
DDX5  
RPL35  
CELF2  
PFN1  
CCNI  
CD37  
CD53  
IGKC  
HLA-DPB1  
PNRC1  
CD2  
EVL  
GADD45B  
HNRNPA1  
RP11-347P5.1  
CD44  
CYBA  
TMA7  
MYL12A  
SLA  
STK4  
IGFBP7  
ZFP36L1  
CYTIP

TGFB1  
TRAC  
CD3E  
CD69  
CD48  
CCL5  
CD3D  
LSP1  
GPSM3  
IL2RG  
CD52  
HLA-DPA1  
LCP1  
RAC2  
ITGB2  
FXD5  
ARPC1B  
STK17B  
GZMA  
FOS  
WIPF1  
ETS1  
SH3KBP1  
EVI2B  
CD3G  
EVI2A  
PTMA  
HBA2  
GIMAP7  
GIMAP4  
LIMD2  
PIK3IP1  
HLA-F  
DUSP2  
CST7  
KIAA1551  
SAMS1  
MYO1F  
SMCHD1  
LCK  
FBNP1  
HCLS1  
EPAS1  
RCSD1  
UCP2

6-Sep

AAK1  
BIN2  
ITM2A  
HLA-DRA  
AKAP13  
RPS29  
RGS10  
SPARC  
STK17A  
TNFAIP3  
PRDM1  
TRBC2

APOBEC3G  
REL  
ISG20  
APOE  
SERF2  
EMB  
SYTL3  
IL10RA  
PPP2R5C  
HBB  
ELF1  
ACAP1  
GLIPR1  
ACTA2  
CD27  
ABRACL  
FYN  
TRAF3IP3  
SMAP2  
CTSS  
LTB  
DOCK8  
HLA-DRB1  
CD96  
ANKRD44  
ALOX5AP  
PRKCH  
NR4A2  
S100A9  
CRIP1  
GZMK  
TRBC1  
PIK3R1  
RGS2  
AKNA  
RGCC  
PCSK7  
IL7R  
CD7  
S100A8  
MYL6  
NKG7  
CCNH  
GRN  
HLA-DQA1  
CARD16  
CREM  
PRPF38B  
TRIM22  
C9orf16  
NKTR  
FAM49B  
COTL1  
OAZ1  
CCL4  
CLEC2D  
ARHGEF1  
RHOA

ICAM3  
FOXP1  
RSRP1  
RNF213  
GNAS  
PSAP  
DEFB1  
S100A1  
KRT19  
MT1G  
C19orf33  
GSTA2  
MACROD2  
RP11-284H18.1  
PPP1R14D  
FABP6  
RP11-1C1.6  
SAA1  
EGFR-AS1  
PDZK1IP1  
LYG1  
WFDC2  
C5orf46  
FXD2  
GSTA1  
REG1A  
TSPAN1  
SAA2  
SLPI  
CRYAB  
MT1E  
UGT2A3  
ADIRF  
CD24  
MAOA  
KRT18  
RBP5  
S100A13  
MGST1  
CYB5A  
PRAP1  
NNMT  
TPM1  
TMEM176A  
NDUFC1  
BNIP3  
CLU  
IFI27  
MT1F  
MALAT1  
NDUFA4L2  
MIF  
SNHG25  
CXCL14  
GAPDH  
TMSB4X  
TCEA3  
HCFC1R1

KRT8  
LDHA  
CCDC146  
SERPINA1  
B2M  
FTH1  
TMEM27  
UGT2B7  
TMSB10  
MT-CO1  
HP  
MIR4458HG  
SRGN  
SLC17A3  
SMIM24  
C11orf54  
TGFB1  
MT-CO2  
S100A10  
BTG1  
HLA-B  
CTHRC1  
LGALS2  
NUPR1  
CD70  
ANXA4  
HLA-C  
MT-ND2  
DDX5  
CXCR4  
MT-ND3  
RPS27L  
SOD2  
JUNB  
HLA-E  
DSTN  
ZFP36L2  
MT-ATP6  
SERPING1  
UQCRCQ  
RARRES2  
FTL  
C1orf186  
NAT8  
GNB2L1  
MT-CO3  
RPL21  
ALDOA  
S100A11  
RPS24  
ARHGDIB  
TMEM176B  
NEAT1  
RPL37  
RPS29  
PTPRC  
DUSP23  
KLF6

FOS  
HRSP12  
GSTP1  
TXNIP  
MT-ND1  
ZFP36  
MT-ND4  
HSPB1  
ATP5I  
DYNLRB1  
S100A6  
HINT1  
OCIAD2  
MT-CYB  
JUN  
HLA-A  
PLIN2  
S100A4  
IFITM3  
RPL10  
TXN  
CORO1A  
RGS1  
COX7C  
CD52  
SON  
HCST  
GMFG  
NDUFB4  
GAMT  
CISD1  
CCL5  
ACTB  
HMGB1  
PPIA  
WBP5  
CD69  
USMG5  
SRSF7  
PTMA  
N4BP2L2  
PPDPF  
RPL31  
TPI1  
RNASET2  
SRSF5  
AC090498.1  
RPL41  
RPSA  
PCBD1  
MYL6B  
H3F3B  
CD3D  
PNISR  
ZFAS1  
PKIG  
GPX3  
ROMO1

CYTIP  
STK4  
RPS20  
XIST  
ATP5H  
H2AFJ  
TNFAIP3  
SARAF  
FYB  
CD44  
SPP1  
PRDX1  
MCL1  
HSP90AA1  
NIT2  
EVL  
ATP5J  
NFKBIA  
CYSTM1  
LAPTM5  
ELF1  
ARPC2  
NACA  
DUSP1  
PRDX2  
CD2  
ENO1  
COX5B  
DDX24  
CD53  
GZMA  
TRAC  
DUSP2  
RPS3  
TSC22D3  
RPLP0  
ARPC1B  
TMEM256  
MPC2  
UQCR10  
SOD1  
ANXA2  
NKG7  
TIMP1  
RPL36  
NPM1  
PPP2R5C  
PABPC1  
NDUFS5  
CD3E  
SLA  
POLR2I  
RPL38  
LSP1  
RP11-347P5.1  
DDX3X  
CD37  
STK17B



LRRFIP1  
RBM39  
AKAP13  
PHPT1  
RPL17  
VAMP2  
ITGB1  
RPS12  
HLA-DRB5  
CCL4  
CD48  
RPL22  
CLIC4  
CCNL1  
POLR2J3  
CELF2  
FUS  
COX6A1  
IFI16  
ITGB2  
CFLAR  
RAC2  
PRPF38B  
FOSB  
IL2RG  
DYNLL1  
FNBP1  
ARGLU1  
JAK1  
AAK1  
NAA38  
ARL6IP5  
ID2  
RNF213  
IER2  
SEC61G  
HIST1H1C  
ANKRD12  
GPSM3  
COX6C  
LCP1  
IDS  
RPS3A  
TRBC2  
COTL1  
PRRC2C  
PIK3IP1  
CST7  
NDUFA2  
WIPF1  
KMT2E  
RPL15  
TXNDC17  
PDCD5  
UBR4  
MT-ND5  
ATP5C1  
MYL6

RPS8  
RSRP1  
COX7B  
GZMK  
NKTR  
EVI2B  
ATRX  
HSBP1  
ARF6  
LINC00493  
STK17A  
NGFRAP1  
ETS1  
MBNL1  
PRKCDBP  
DDX17  
C12orf75  
ROCK1  
NDUFA7  
HLA-F  
WSB1  
PNRC1  
KIAA1551  
TCF25  
UQCRB  
ARID4B  
HNRNPA2B1  
RNF181  
HERPUD1  
AKAP9  
UQCRH  
PPP1R15A  
SCAF11  
MINOS1  
RBM25  
STAT3  
IRF1  
HEBP2  
HNRNPA0  
ITM2A  
CLK1  
HMGB2  
SMCHD1  
PCSK7  
SAMSN1  
ADI1  
CETN2  
MYH9  
CD3G  
CCND3  
CTSS  
HNRNPA3  
TRBC1  
FAM162A  
SRSF2  
JUND  
PPP1R2  
LTB

WASF2  
GIMAP4  
ACAP1  
MZT2A  
TRA2B  
BTG2  
SYNE2  
TNRC6B  
LCK  
RSRC2  
ADGRE5  
CYBA

7-Sep

SP100  
SRRM2  
NCOR1  
ACTR2  
RGCC  
RPS27  
PSMA3-AS1  
NDUFA1  
DNPH1  
GCC2  
NCL  
IL7R  
LAMTOR5  
TUBA1A  
REL  
BCLAF1  
NDUFB10  
CLEC2B  
KIF5B  
RPL36A  
RPL8  
LIMD2  
CLEC2D  
MTDH  
CD7  
MSN  
XRCC5  
SLC25A6  
CD99  
ATP5G3  
CFAP36

6-Sep

POLR2L  
EVI2A  
SH3KBP1  
FOXP1  
TERF2IP  
YWHAZ  
LUC7L3  
PRDM1  
VDAC1  
MYO1F  
PDCD4  
CFL1  
FKBP5

ATPIF1  
RBPJ  
SYTL3  
FAM133B  
RPL7  
PEBP1  
FKBP2  
SF1  
FYN  
CRIP1  
MPHOSPH8  
TRAF3IP3  
SERF2  
USP15  
ZFP36L1  
GLIPR1  
PNN  
SYTL2  
CDC42SE2  
MRPL51  
EMB  
KTN1  
IQGAP1  
NR4A2  
IL10RA  
GLTSCR2  
BNIP3L  
TBCA  
HCLS1  
SLC2A3  
ANKRD44  
SRSF11  
THRAP3  
ARHGEF1  
NDUFA4  
RPL24  
FXD5  
PPP1R12A  
RPL9  
BIN2  
TAOK3  
GNLY  
DOCK8  
HNRNPU  
MT-ND4L  
RCSD1  
ODF2L  
FAM49B  
EPC1  
BOLA3  
PRKCH  
SH3BGR13  
ATP5O  
CD96  
PDLIM1  
RPA3  
GIMAP7  
AKNA

PIK3R1  
CNN3  
RPS21  
MYCBP2  
EMP3  
ATM  
BTN3A2  
EIF4A2  
UCP2  
NHP2  
CREM  
SRRM1  
ANGPTL4  
LEPROTL1  
ISG20  
CHMP4A  
GLRX  
PSMB9  
PPIG  
EEF2

9-Sep

BRD2  
COX6B1  
YPEL5  
CAP1  
TLN1  
RPL23  
DBI  
ARPC4  
MACF1  
RPS11  
DDX6  
JMJD1C  
PFKP  
SF3B1  
DDX46  
CARHSP1  
NDUFB6  
MGST3  
CCNH  
RNF19A  
CD27  
APOBEC3G  
ATOX1  
TAPBP  
RGS10  
SMAP2  
MMP24-AS1  
HNRNPM  
TGOLN2  
RNPS1  
EIF5  
MGEA5  
DHX36  
WNK1  
TPR  
BLVRB  
UBXN1

UBB  
DNAJB6  
BUB3  
PAPOLA  
VIM  
DNAJA1  
RGS2  
CFDP1  
RHOG  
SLTM  
TAF7  
MYL12A  
WDR1  
GNAI2  
ACTR3  
HLA-DPB1  
MRPL40  
ZFAND5  
CKLF  
CTSC  
HNRNPH1  
ICAM3  
RTF1  
CCDC85B  
ATP5G1  
ALOX5AP  
NDUFB9  
PRDX6  
DPY30  
PRKAR1A  
RAB13  
GABPB1  
RABAC1  
OST4  
UQCR11  
ANXA6  
NFE2L2  
LAMP1  
HSPA8  
PCM1  
FKBP8  
SELM  
RNF149  
FUNDC2  
HNRNPR  
YWHAB  
DNAJB1  
RAP1A  
MGST2  
SF3B2  
SFPQ  
CD164  
SELT  
ATP6AP2  
S100A9  
TRIM22  
VMP1  
RSF1

GNG5  
ATP1B3  
ARPC5  
RPL36AL  
NDUFB7  
TCEB2  
CALM1  
CASP4  
POLR3GL  
NDUFV2  
MT2A  
TMEM14C  
LITAF  
PSME1  
ATP1B1  
FCER1G  
LIMS1  
PPP1CA  
TUBA4A  
ATP6V1G1  
GABARAP  
PRDX5  
CMC1  
DDT

2-Sep

ARID5B  
PLA2G16  
HILPDA  
IFNGR1  
PPA1  
FAM96B  
C10orf54  
SAT1  
LAPTM4A  
EIF4A1  
SDCBP  
SSU72  
RHOA  
DRAP1  
YBX3  
MRPL22  
SNRNP70  
HLA-DPA1  
BZW1  
HSPE1  
C16orf13  
NDUFS4  
HLA-DQA1  
GGNBP2  
ST13  
LINC00152  
GTF2H5  
TYROBP  
ZNHIT1  
MRPS21  
MRPS6  
ATP5G2  
CAPZB

CD63  
COX8A  
AIF1  
PKM  
H2AFV  
EIF1AX  
CSTB  
VKORC1  
COA4  
C9orf78  
GYPC  
GPX4  
ANXA1  
CHMP2A  
CDC37  
HMGN3  
ZCRB1  
C19orf70  
TAGLN2  
PRR13  
LYZ  
IGKC  
TIMM13  
CD151  
VAMP5  
LINC00998  
RAP1B  
SNRPB2  
NDUFA11  
NDUFB2  
MEA1  
BIRC3  
SPINT2  
CEBPB  
BAX  
HBB  
ATP5E  
COX5A  
RNF5  
YWHAE  
C3  
MRPS36  
TCEAL4  
PPIB  
SHFM1  
TRAPPC2L  
CNDP2  
GLUL  
TIMM8B  
NDUFC2  
COA3  
EDF1  
CEBPD  
CWC15  
NDUFB5  
TRMT112  
ECH1  
MORF4L2



POLR2J  
ATP6V1F  
TMEM258  
EIF4EBP1  
MZT2B  
ATP5L  
CAMTA1  
CD68  
PGAM1  
GUK1  
SRP14  
EIF5A  
TMEM230  
JCHAIN  
IGHGP  
CD79A  
IGHG4  
IGHG3  
IGHG1  
MZB1  
IGHM  
IGLC3  
IGLC2  
IGKC  
IGHA1  
B2M  
HLA-A  
GAPDH  
HLA-B  
IL32  
TMSB4X  
VIM  
HCST  
ID2  
FYB  
TMSB10  
CD2  
MYL6  
ARPC2  
ACTG1  
CD3E  
CD3D  
ITM2B  
PTPRC  
UQCR11  
TNFAIP3  
ACTB  
ITGB1  
CCL5  
S100A10  
GIMAP4  
HLA-C  
ATP5E  
COX6C  
AAK1  
SRP14  
GZMA  
SSR4

ITGB2  
CST7  
MYL12A  
SKP1  
SUMO2  
MYL12B  
RARRES3  
ENO1  
PSMA7  
GUK1  
HSP90AA1  
NDUFS5  
CD99  
ARL6IP5  
CCL4  
HSPA8  
HMGB1  
YWHAB  
HLA-E  
SON  
HMGN2  
COX5B  
TMA7  
RPS24  
GZMK  
TPM3  
PIK3R1  
GIMAP7  
ITM2A  
CTSD  
TRBC2  
CD3G  
PRKCH  
RGS1  
DUSP2  
PIM2  
TRAC  
USMG5  
PRMT2  
COMMD6  
LINC00152  
RNF213  
S100A11  
CD7  
CALM1  
S100A4  
HNRNPA1  
SLA  
ATP5I  
LCK  
TPI1  
VAMP8  
CFL1  
ANXA1  
FYN  
RAC1  
ARPC1B  
RHOA

APOE  
NUCKS1  
IFITM3  
LDHA  
SHFM1  
JAK1  
PFN1  
SH3BGRL3  
ATP5J2  
SYNE2  
SERF2  
CLEC2B  
PSME1  
MSN  
GSTK1  
CD96  
MYO1F  
HMGB2  
UBL5  
LCP1  
IFI16  
SOD1  
PSMB8  
BTG1  
TRBC1  
SARAF  
FKBP5  
SEPW1  
DNAJB1  
ATP5G2  
HNRNPC  
DYNLT1  
CAPZB  
CTSC  
TPT1  
TSPO  
EVL  
CLIC1  
UBB  
RHOC  
LDHB  
SUB1  
NDUFA3  
IGFBP7  
MBNL1  
DYNLRB1  
UQCRB  
GLRX  
GNAS  
NEDD8  
COX7C  
IL7R  
ALDOA  
NKG7  
GBP2  
COX8A  
COX6A1  
PSMB9

RBPJ  
PA2G4  
AKAP13  
HSPB1  
NDUFB8  
HLA-F  
SYTL3  
RTN4  
CD44  
PPIA  
DDIT4  
BSG  
WIPF1  
JUN  
LEPROTL1

7-Sep

MCL1  
NDUFC2  
MIF  
PGK1  
ARHGDIB  
HSPE1  
PSMB1  
UBE2L3  
CAP1  
XRCC5  
GSTO1  
HNRNPK  
SRSF7  
TMEM50A  
PTMA  
RBX1  
CBX3  
COX7A2  
PRPF38B  
HNRNPA2B1  
AP2M1  
FUS  
PAIP2  
SERBP1  
YWHAQ  
SCP2  
FXD5  
COX7B  
EID1  
RGCC  
SNRPD2  
HNRNPA3  
PPP1CA  
S100A8  
C12orf57  
ERH  
PKM  
WNK1  
HSP90AB1  
TXN  
KIF5B  
H2AFZ

VAMP5  
OST4  
PIK3IP1  
PTP4A2  
ODF2L  
CARD16  
HP1BP3  
ARF1  
SH3KBP1  
CCNH  
RAB7A  
BLOC1S1  
COX6B1  
GPX4  
CKLF  
MORF4L1  
VMP1  
PLIN2  
MPC2  
CSNK1A1  
BAX  
S100A9  
UGP2  
MACF1  
CEBPD  
HNRNPF  
UQCR10  
PPP1R12A  
TLN1  
CALM2  
GPX1  
HNRNPU  
RBM25  
ETS1  
ALOX5AP  
RAN  
PSME2  
RGS10  
CELF2  
PEBP1  
EMB  
MYH9  
APOBEC3G  
NDUFA4L2  
SNRPB2  
NFKBIA  
YWHAH  
GABARAPL2  
LIMS1  
MINOS1  
SDCBP  
SNRPG  
ROCK1  
RANBP1  
GCC2  
IDS  
PCBP1  
NDUFC1

CSTB  
BIN2  
NDUFA13  
DHRS7  
SEC11A  
DDX24  
MGST3  
FKBP1A  
HCLS1  
CALM3  
LGALS1  
C9orf78  
DNAJC8  
KTN1  
RPS27L  
ACTR2  
PPP2R5C  
CIB1  
HMGN1  
DYNLL1  
DNAJA1  
SAP18  
SSBP1  
SH3GLB1  
EIF3H  
CST3  
VPS28  
AHNAK  
SRI  
CHURC1  
GNAI2  
NDUFB9  
BUB3  
RNF149  
C14orf166  
LSP1  
DDX3X  
PSMA4  
ROMO1  
IQGAP1  
NCL  
RWDD1  
TBCA  
ATP5J  
TCF25  
SRSF11  
ANXA5  
NKTR  
TUBA1B  
TMEM219  
RBM8A  
STAT3  
SRP9  
LY6E  
DDX46  
APOC1  
PRRC2C  
ANP32B

IFI27L2  
POMP  
ATP5F1  
NDUFB4  
CD63  
FIS1  
PRDX1  
ATP6V0E1  
PGAM1  
COX14  
TGOLN2  
DNAJB6  
SFPQ  
MT1X  
LAPTM4A  
CMC1  
RNF7  
WSB1  
HMGN3  
ARID4B  
HNRNPM  
SF3B2  
DDX17  
PRELID1  
CDC37  
DSTN  
RNF181  
APLP2  
YWHAE  
ACAP1  
GYPC  
CCT8  
NDUFB5  
PCSK7  
UBC  
ACTR3  
ENY2  
SSB  
ZFP36  
ZFP36L2  
C1QA  
ATP1B3  
AC090498.1  
PHPT1  
EIF3A  
MT-ND4L  
ARHGDIA  
PPP1R2  
TAOK3  
KHDRBS1  
ATP5B  
RHOB  
NFE2L2  
SRRM2  
STK4  
RNF19A  
RHOG  
POLR1D

RNH1  
SF3B6  
NCOR1  
TAGLN2  
MZT2B  
HERPUD1  
LAMTOR5  
PDCD4  
C9orf142  
PPIG  
TERF2IP  
HSPD1  
NNMT  
ST13  
TMEM256  
CRIP1  
UBXN1  
CRYAB  
XIST  
NSA2  
PNN  
EIF1B  
SQSTM1  
SERPINA1  
RGS5  
ACTA2  
TAGLN  
BGN  
CALD1  
MYL9  
TPM2  
CPE  
GJA4  
FRZB  
PLAC9  
PDGFRB  
MAP1B  
CD36  
THY1  
RASD1  
PLN  
COL6A2  
TINAGL1  
LHFP  
MYLK  
SOD3  
COL1A2  
COL18A1  
MFGE8  
MYH11  
PGF  
TPPP3  
ID1  
MCAM  
FABP4  
CYGB  
COX4I2  
COL4A2



PPP1R14A  
EPS8  
KCNE4  
PALLD  
NOTCH3  
CSRP2  
KCNJ8  
TGFB1I1  
HIGD1B  
GJC1  
COL6A1  
FILIP1  
CRISPLD2  
KANK2  
DKK3  
NR2F2  
CLMN  
EBF1  
S1PR3  
KLHL23  
PLS3  
MYO1B  
COL3A1  
VCL  
C11orf96  
FXVD6  
COX7A1  
NES

4-Sep

PLXDC1  
CCDC102B  
NEXN  
CARMN  
JAG1  
TMEM47  
TBX2  
ID4  
AC013461.1  
GUCY1A3  
KCNAB1  
CDH6  
ADAMTS1  
SSTR2  
VASN  
AKAP12  
SLC38A11  
PARM1  
CNN1  
EFHD1  
OLFML2A  
PTK2  
DLC1  
SLIT3  
PTN  
CHST2  
FRMD3  
RCAN2  
GPRC5C

ADGRF5  
CSPG4  
GUCY1B3  
AGTR1  
HOXC9  
FHL5  
FOXS1  
RERG  
DAAM2  
HEYL  
MSRB3  
FOXC2  
LGI4  
NFASC  
COL5A2  
NGFR  
ARHGEF17  
MOCS1  
ACAN  
PRRX1  
LMOD1  
RGL3  
RBP1  
C1QTNF1  
MAP2  
SELENBP1  
PTGIR  
ABCC9  
NGF  
SYDE1  
NDN  
LRRC17  
SMOC2  
SLC7A2  
NR2F2-AS1  
RASL12  
PDGFA  
GUCY1A2  
LURAP1L  
PRKG1  
TCF21  
MRVI1  
C9orf47  
PDE5A  
TBX2-AS1  
LZTS1  
ITGA7  
FBLN1  
SGIP1  
CCDC3  
GPR176  
EDNRA  
DDR2  
TBX3  
ECM1  
ANO1  
CD248  
HTR1F

SEMA5A  
HEY2  
TUSC3  
ANGPT1  
ADGRA2  
EBF2  
ECM2  
PRR16  
NEURL1B  
PDE1A  
FAM162B  
RNF180  
ISYNA1  
EPB41L1  
ID3  
CDC42EP4  
COL4A1  
SNAI2  
CAV2  
CPM  
MGP  
SCGN  
CNN3  
ACTN1  
LGALS3BP  
FILIP1L  
PCOLCE  
CSRP1  
FERMT2  
ENAH  
PARVA  
HES4  
EPAS1  
UACA  
PTPRG  
PHLDA1  
RBMS3  
MAP3K7CL  
ANTXR1  
PLEKHA4  
ARHGAP42  
TIMP3  
APBB2  
TNS1  
SLC12A2  
PDLIM3  
EHD2  
DCBLD2  
TMEM98  
SPARCL1  
ADAMTS4  
IGFBP5  
LAMB2  
FAT1  
ENPEP  
MEIS2  
CDC42BPA  
PMEPA1

EDIL3  
TPM1  
MT1M  
PTPRK  
PPP1R12B  
SPARC  
SMTN  
OLFML2B  
ITM2C  
STEAP4  
DMD  
PTRF  
PLEKHH3  
PPIC  
COBLL1  
NR2F1  
P2RY14  
CAV1  
SERPING1  
LIMA1  
PLAT  
IGFBP4  
TMEM38B  
TNS2  
ADIRF  
SEPP1  
SDC2  
COL1A1  
NRP1  
TMEM204  
FHL1  
CLIC4  
PAWR  
NDRG2  
ESAM  
CTGF  
CLEC11A  
BCAM  
ITGA1  
GSN  
INPP4B  
IGFBP7  
PDLIM7  
DSTN  
TPM4  
FAM213A  
CRIP2  
NGFRAP1  
NID1  
PDLIM1  
APOLD1  
FHL2  
LAMC1  
RND3  
FSTL1  
RBFOX2  
MDK  
FKBP10

ROCK2  
SPECC1  
SMIM3  
TLE1  
ST5  
CTTN  
LPP  
LPL  
EDNRB  
WBP5  
C16orf45  
HSPB2  
SOCS2  
ZNF503  
PRKCDBP  
PDLIM5  
PACSIN2  
CFL2  
NTN4  
NBL1  
NDUFA4L2  
FBLIM1  
CD151  
RASAL2

11-Sep

MAP1LC3A  
TSC22D1  
EMCN  
FBXO32  
SASH1  
PTMS  
GNAI1  
RBPMS  
CYSTM1  
TWSG1  
CHN1  
FN1  
TRIP6  
CAMK2N1  
PRSS23  
EFEMP2  
GAS6  
KLHDC8B  
CHST7  
GNG12  
NUDT4  
JADE1  
AK1  
B3GNT2  
MEF2C  
MAGED2  
UBA2  
H1FO  
PKIG  
ILK  
RAPGEF5  
TIMP1  
GSTM3

TRIB2  
TCF4  
LGALS1  
SERPINH1  
SLCO3A1  
IFITM3  
FARP1  
OAZ2  
C4orf32  
ARHGAP10  
GOLIM4  
C1orf54  
TJP1  
ARHGAP29  
COL6A3  
PPFIBP1  
A2M  
CYB5R3  
HSPB1  
UBE2E2  
ZFHX3  
SPTBN1  
SGCB  
CD59  
SPRY2  
RGS16  
EPHX1  
TSPAN3  
PTEN  
FAM127A  
AXL  
SORBS2  
LMNA  
APP  
ENG  
GPX3  
IFI27  
PPARG  
ARMCX2  
DST  
GRK5  
ZBTB16  
FAM46A  
MYO1C  
FLNA  
SERPINI1  
ITGB1  
ARHGAP17  
SELM  
MYL6  
TCF7L2  
MARCKSL1  
ARHGEF7  
WBP4  
CDKN1A  
HIP1  
TUBB6  
LEPROT

CALU  
MGST3  
PTPN9  
ARHGAP1  
SORT1  
SOX4  
EPB41L2  
FSTL3  
H2AFJ  
CSNK1E  
CST3  
TRAK1  
TOB1  
KLF9  
ASAP1  
PHACTR2  
CTBP2  
TCEAL4  
HES1  
TACC1  
CPQ  
MTHFD2  
INAFM1  
IFIT3  
UTRN  
NFIA  
PELO  
MTUS1  
RPS29  
ADAP2

7-Sep

MAGEF1  
CD63  
KIAA0040  
C5orf24  
PRKAR1A  
EGR1  
AAMDC  
GRAMD3  
TFPI  
RHOB  
RSU1  
LAPTM4A  
CRIM1  
FHL3  
TNS3  
EID1  
SPATS2L  
ITGAV  
SCPEP1  
STOM  
DYNLT3  
CBX6  
OSBPL1A  
NENF  
RPL28  
HTRA1  
ACTN4

SH3BGRL  
MIR4435-2HG  
SSPN  
BCL6  
RCN2  
IFI6  
CEBPD  
ZMAT3  
PPP1R12A  
CYBRD1  
FABP5  
HCFC1R1  
CD9  
ARMCX3  
ZBTB20  
ZHX1  
SEPW1  
ADI1  
DYNC1I2  
HIGD1A  
SLC39A6  
RPS27  
TAX1BP3  
ADD3  
CDC5L  
RPS15A  
SBDS  
TIMP2  
AIG1  
ANXA6  
DYNLL1  
BCAP29  
RPS28  
PEBP1  
MT2A  
RPS2  
RPL39  
CALM2  
BSG  
RPLP2  
F2R  
RAC1  
CXCR4  
EI24  
OLFML3  
RAB2A  
RRAGA  
RPL41  
RABGAP1  
HSD17B12  
CRTC3  
SMARCB1  
MAP4  
ARHGEF12  
ADD1  
ARFGAP3  
EEA1  
ABI2



RNASEH2C  
CBR1  
TLN1  
MT-CYB  
NUCKS1  
PTPRC  
DCTN2  
ZNF428  
RPS12  
AP2M1  
SKP1  
CHD9  
FNIP2  
ACTR10  
AHCYL1  
SYPL1  
DDAH2  
VIMP  
FDX1  
KCNMB1  
GBP2  
RTN4  
RPL10  
CHCHD10  
RPS25  
TMEM14C  
RPS3  
ATP5B  
RPL26  
SYNE2  
OSBPL9  
BST2  
ACADVL  
KTN1  
RHOC  
VASP  
PTPN12  
ZFP36L2  
TMSB10  
NDUFS2  
TMEM59  
SLC25A3  
RGS1  
ITFG1  
ARF4  
POLR2F  
CLTA  
ZFAND5  
RPLP1  
MTRNR2L8  
TBC1D1

2-Sep

RPS14  
CORO1A  
ROCK1  
VMP1  
RPS21  
RPL23A

COX17  
MRFAP1  
NSRP1  
ATP6AP2  
TIPARP  
HSP90AA1  
RBMS1  
TMEM165  
SUMO2  
CCND1  
HCST  
RPL27A  
RPS24  
ISG15  
RPS6  
EIF4A1  
TMEM30A  
HSP90B1  
RPL37  
SRGN  
ERH  
DENND3  
RPS18  
PAK1  
RPL11  
RPL30  
S100A6  
LAPTM5  
RPL13  
MT-ATP6  
VIM  
MYH9  
RPL36  
RPS19  
RPL34  
FKBP5  
RPL18A  
GADD45B  
LUC7L3  
CD2  
CD164  
CD37  
IL32  
RPL19  
UBA52  
LINC00152  
ELOVL5  
RPL38  
RPS20  
FYB  
RPL31  
ACTB  
BTG1  
RPL13A  
S100A10  
RPS26  
CD69  
CYTIP

TXNIP  
MAPRE1  
SLA  
CD3E  
RPS17  
CD53  
RPS27A  
STK4  
RPSA  
CELF2  
CD74  
DUSP2  
TRAC  
JUN  
RPL21  
CCL5  
CD52  
CD3D  
SH3BGR3  
FOSB  
GZMA  
RPS15  
RAC2  
EVI2B  
FAU  
S100A4  
LSP1  
CD48  
LCP1  
IL2RG  
RPL36A  
SAMS1  
CST7  
RPL18  
SYTL3  
ACAP1  
VAMP8  
ITGB2  
RPS16  
CD3G  
EVI2A  
RP11-347P5.1  
KLF6  
TNFAIP3  
UCP2  
HLA-DRB1  
GIMAP4  
CLEC2B  
RPS10  
TRBC2  
ID2  
FOS  
BIRC3  
FAM49B  
ICAM3  
FXD5  
STK17A  
ALOX5AP

PPP2R5C  
STK17B  
CCL4  
RGS10  
ITM2A  
HMGB2  
CYBA  
GZMK  
GIMAP7  
LTB  
EMB  
HLA-DPA1  
CLEC2D  
BIN2  
GPSM3  
TRAF3IP3  
TRBC1  
CD7  
ATP5E  
PIK3IP1  
NDUFA4  
WIPF1  
TUBA4A  
PRDM1  
LCK  
EVL  
HLA-DPB1  
COTL1  
IL10RA  
CD27  
CD96  
NKG7  
IL7R  
DUSP1  
LITAF  
PRKCH  
OCIAD2  
CDC42SE2  
CTSS  
RPS5  
TPM3  
APOBEC3G  
DOCK8  
FTL  
SARAF  
RPL24  
RGS2  
REL  
OAZ1  
RPLP0  
MYO1F  
DDIT4  
RNASET2  
SAT1  
HLA-DRB5  
HLA-E  
HLA-DMA  
ISG20

HLA-DQB1  
MKI67  
TOP2A  
KIAA0101  
NUSAP1  
CENPF  
UBE2C  
ASPM  
TYMS  
BIRC5  
RRM2  
TPX2  
CDK1  
CCNA2  
ZWINT  
CENPM  
CDKN3  
MAD2L1  
CENPU  
PRC1  
AURKB  
CLSPN  
ASF1B  
TK1  
NUF2  
CDCA8  
UBE2T  
CDC20  
GTSE1  
FAM111B  
TCF19  
KIF15  
CASC5  
SPC25  
CCNB2  
HIST1H1B  
CDT1  
BRCA1  
KIF23  
CENPW  
FEN1  
RAD51AP1  
KIFC1  
DLGAP5  
KIF11  
CENPA  
CKAP2L  
SPC24  
KIF2C  
HJURP  
CENPN  
CDCA3  
CEP55  
SGOL1  
ESCO2  
HMMR  
CDCA5  
NCAPG

FANCI  
UHRF1  
KIF14  
RAD51  
TROAP  
PBK  
MELK  
DEPDC1B  
MCM10  
MND1  
CDC45  
SPAG5  
SGOL2  
KIAA1524  
CENPK  
NCAPG2  
BUB1  
ATAD5  
SHCBP1  
MXD3  
GGH  
CENPE  
STMN1  
ARHGAP11A  
FBXO5  
NCAPH  
ECT2  
SMC2  
RACGAP1  
HELLS  
MCM4  
CKS1B  
SAC3D1  
EZH2  
BRCA2  
CHEK1  
MCM2  
ARHGAP11B  
GINS2  
RMI2  
CENPH  
ATAD2  
CDCA7  
AURKA  
CCDC34  
HMGB3  
PCNA  
C21orf58  
MCM7  
PTTG1  
LMNB1  
CDCA4  
BARD1  
NDC80  
DNAJC9  
DHFR  
DTYMK  
FANCD2

NCAPD2  
CKS2  
WDR76  
WHSC1  
PHF19  
TACC3  
H2AFX  
MCM6  
RRM1  
CHAF1A  
SNRNP25  
MCM3  
SMC4  
KIF20B  
RFC3  
GMNN  
RFC4  
TUBB  
HIRIP3  
RP11-545E17.3  
BCL2L12  
TMEM106C  
YEATS4  
TUBA1B  
RNASEH2A  
HMGB2  
NCAPD3  
LIG1  
SKA2  
USP1  
KIF22  
TTF2  
VRK1  
TMPO  
CEP152  
H2AFZ  
H2AFV  
UBE2S  
POLD3  
FANCA  
CDC25B  
PXMP2  
HIST1H1D  
HIST1H4C  
ANP32E  
DNMT1  
PRIM1  
TEX30  
HMGN2  
NUDT1  
KPNA2  
SAE1  
RPA3  
HIST2H2AC  
CDKN2C  
TUBB4B  
RPL39L  
SMC1A

CKAP2  
ACYP1  
DDX39A  
MCM5  
CARHSP1  
CBX5  
HIST1H1E  
MAD2L2  
C12orf75  
RAD51C  
WDR34  
CALM3  
RBBP7  
ORC6  
PTMA  
CRIP1  
HMGB1  
MZT1  
RANBP1  
TOPBP1  
DEK  
DUT  
CKAP5  
SLBP  
SUZ12  
FABP5  
RAD21  
SMC3  
MIR155HG  
PSIP1  
HN1  
FAM111A  
NUCKS1  
CCDC167  
EBP  
NUP37  
ANP32B  
CBX1  
RAN  
HLTF  
IDH2  
LSM2  
SIVA1  
CDKN2D  
SUPT16H  
APOBEC3H  
HNRNPAB  
LBR  
ZDHHHC12  
HMGXB4  
TFDP1  
HDAC1  
LAG3  
HPRT1  
DCTN3  
HMGN1  
C19orf48  
SH2D1A



SNRPD1  
TNFRSF9  
MPHOSPH9  
HSPB11  
CEP78  
ACTL6A  
SNRPF  
LSM4  
BUB3  
HDGF  
NASP  
CDK5RAP2  
UQCC2  
TOX  
CTCF  
SNRPB  
ACTB  
STRA13  
NUDT21  
HNRNPD  
DUSP4  
COX8A  
CDK2AP2  
MIS18BP1  
CFL1  
LSM5  
PMVK  
SRSF10  
BAZ1B  
HAT1  
HIST1H1C  
SSRP1  
CEP57  
ARPC5L  
ANXA6  
ANKRD36C  
TUBA1C  
SIT1  
H2AFY  
SRRT  
PPIA  
PFN1  
ACTG1  
CDKN2A  
HNRNPR  
PPM1G  
SLC25A5  
KIF2A  
FAF1  
ARL6IP1  
ARL6IP6  
BTG3  
CD8B  
PPP1CA  
CD8A  
NONO  
RAB27A  
PMF1

NFATC2IP  
PSMB2  
XPO1  
HNRNPF  
SRP9  
BANF1  
HNRNPA2B1  
GZMA  
ASH2L  
HNRNPA3  
VCAM1  
DDB2  
VBP1  
CMC2  
CBX3  
SUB1  
PSMC3  
CNTRL  
TAP1  
COX5A  
MZT2B  
RALY  
UBE2A  
PDIA6  
RUNX3  
DCXR  
PIN1  
CD82  
GAPDH  
PARP1  
MAPRE1  
SFPQ  
MAGOH  
SNRPD3  
APOBEC3C  
ILF2  
FTL  
CORO1A  
PSMB9  
RPL34  
SRSF2  
HSD17B10  
RAC2  
EIF4A3  
BLVRA  
RPL13  
KPNB1  
HNRNPM  
SNRPG  
RPS14  
NUCB2  
RHEB  
PMAIP1  
LSM3  
APOBEC3G  
SPN  
NDUFC2  
SRSF3

STAG1  
BLOC1S1  
CD27  
HP1BP3  
NOP56  
PSMB8  
PGAM1  
CXCR3  
WNK1  
SDF2L1  
TPR  
YWHAQ  
HNRNPA0  
PTPN11  
TPM3  
LAT  
NDUFB3  
PLP2  
PSMB6  
C9orf142  
TIMM10  
CRTAM  
WDR1  
PSMA4  
TUBA4A  
GTF3C6  
LINC00152  
IFI16  
SUMO3  
PSMA5  
CD3G  
UBALD2  
LYST  
ATP5G3  
PSME2  
FAM195B  
CYB5B  
PRPF4B  
NDUFS6  
NDUFA2  
TALDO1  
CHCHD2  
TRAC  
PARK7  
ITM2A  
HNRNPA1L2  
RBX1  
XRCC5  
PKM  
NDUFB11  
PSMG2  
NKG7  
RPL41  
COX17  
IFI27L2  
LCP1  
RP11-160E2.6  
GALM

PSMA3  
ATPIF1  
RPL10  
CALM2  
SET  
ERH  
NABP2  
RHNO1  
CD3D  
SUMO2  
XRCC6  
PTPN7  
HMGN3  
HNRNPA1  
RPS27  
ANXA5  
UBB  
PSMD8  
NAA38  
RNPS1  
TSTD1  
ATP5L  
RP11-386114.4  
RPL3  
ABRACL  
TMSB4X  
ARPC2  
DBI  
ANAPC11  
PSMB10  
THRAP3  
PTMS  
ZNF706  
EEF1A1  
RPL26  
SVIP  
MPDU1  
SNRPC  
COX6C  
NCL  
DNAJC8  
PPP4C  
ATP5J2  
RBM8A  
GNG5  
ARPC5  
TPT1  
PNRC2  
IL2RG  
LSM7  
VDAC1  
EIF2S2  
POLR2G  
RBMX  
PA2G4  
NAP1L1  
RPL13A  
RPL39

HLA-A  
C11orf31  
BZW1  
RPL35A  
TXNIP  
SPCS2  
RHOA  
YBX1  
GZMK  
CTSW  
HNRNPC  
CKLF  
CD2  
ATP5E  
HNRNPU  
RPS18  
HINT1  
SF3B2  
RPL9  
LIMD2  
DUSP1  
COTL1  
CAPZB  
HLA-F  
RPL30  
CD99  
HSPA8  
SRSF7  
FAM3C  
TRBC2  
LY6E  
CALM1  
RPS25  
MALAT1

7-Sep

CLTA  
PCBP2  
FTH1  
LSP1  
ARPC1B  
ITM2B  
TRBC1  
NR4A2  
RPS13  
TSC22D3  
PNRC1  
PFDN5  
JUNB  
DDX5  
FOS  
TOMM7  
RBPJ  
NEAT1  
BTG1  
LINC01320  
C1orf186  
ACSM2B  
ACSM2A

PNCK  
EMX2  
DOC2A  
KCNJ16  
PRUNE2  
MACROD2  
UGT2A3  
PPP2R3A  
PAX8  
ELF3  
PAX2  
CDHR5  
ERBB3  
SLC16A12  
KIF12  
DNAH11  
RP11-807H17.1  
CFB  
ITGB8  
AOC1  
PKHD1  
AHNAK2  
SLC39A5  
PRSS8  
PROM1  
HOGA1  
DCDC2  
KCNJ15  
LINC01559  
MUC1  
FAM150B  
NEFL  
SLC34A2  
SLC44A4  
RAB42  
FAM65C  
PTPRM  
HHLA2  
HSF4  
CLDN3  
POU5F1  
MST1  
SLC28A1  
ARHGEF28  
UGT2B7  
ADAMTS9-AS1  
ABCC3  
TACSTD2  
ZNF608  
CLDN4  
SLC39A14  
RHOBTB1  
TNFRSF11B  
CDK18  
PLCB4  
SLC6A8  
ABHD11-AS1  
SLC17A3

EGFR  
HPN  
GATM-AS1  
CCDC64B  
ERRFI1  
PRKAA2  
LINC01358  
AR  
VEGFA  
CLRN3  
BICC1  
SEMA5B  
GAL3ST1  
AMN  
CAPN12  
SLC44A3  
FBXO17  
PPP1R14D  
TMEM98  
ASPA  
ALPK2  
PDZK1  
C1S  
PARD6B  
FAT1  
HSD3B7  
SLC3A1  
MET  
CDH2  
RP11-1C1.6  
MAOA  
DMKN  
EMX2OS  
EGFR-AS1  
EPCAM  
TSPAN1  
ACY3  
STARD4-AS1  
SLC16A4  
RERG  
MVK  
SLPI  
EVA1A  
ADAMTS9-AS2  
ANPEP  
TMEM139  
SLC4A4  
KRT19  
CLEC18C  
COBLL1  
DIXDC1  
SLC22A2  
RP11-1C1.4  
MTMR11  
DDR1  
CDH6  
CP  
HIF1A-AS2

CA9  
SLC47A1  
CFI  
ACMSD  
CUBN  
ZNF320  
EPS8L2  
DLG5  
CLDN7  
NR1H4  
RP11-14N7.2  
S100A1  
FN3K  
CA12  
ACSM5  
SERPINF2  
ENPEP  
KBTBD11  
MYEOV  
SERINC2  
HILPDA  
HSPB8  
HOOK2  
REG1A  
CNKSR3  
GNG12  
SLC6A13  
CTHRC1  
LINC00887  
MIOX  
MIR210HG  
LRRC41  
CFH  
TMEM45A  
PPP1R3C  
WFDC2  
PAWR  
HRCT1  
PLOD2  
AEBP1  
C1R  
RAB3IP  
ZNF395  
ANGPTL4  
LMO7  
PLEKHA5  
SLC37A4  
ITGA3  
KISS1R  
GSTA2  
APOL1  
CDCA2  
C19orf33  
C11orf54  
FAM134B  
ZNF248  
SAA2  
INADL



RDH5  
MT1H  
CES4A  
TFPI  
FAM13A  
CES2  
FABP3  
PPP1R13L  
BHMT2  
PDK1  
GSTA1  
ENPP3  
SAA1  
AK4  
PTER  
TNFAIP6  
GALE  
PPP1R16A  
GGT1  
KRT8  
HAUS7  
SDC4  
CCL28  
TMEM91  
CYP3A5  
NBL1  
TCEA3  
MMP7  
KCTD3  
ENOSF1  
FARP1  
C5orf46  
TMEM27  
TGM2  
RASSF4  
DYNC2LI1  
RP11-83A24.2  
MT1G  
RBPMS  
ENO2  
TLN2  
SMIM24  
SPINT1  
TMSB4X  
TNFRSF12A  
MACC1  
MGST1  
RRAD  
PPFIBP1  
P3H2  
GATM  
B2M  
RGS12  
PTPRF  
CALD1  
TPM1  
CXCL14  
ZMYND8

FNBP1L  
MXRA7  
AQP3  
WDR60  
RBP5  
RND3  
FHL1  
TMEM37  
TSPAN12  
RDH13  
ASS1  
DPCD  
DEFB1  
BHLHE41  
EGLN3  
OXR1  
SORBS2  
FABP6  
CD70  
NFIB  
PROS1  
EFNA1  
KHK  
PPP1R3B  
CCDC146  
WDR34  
PRRG4  
ANK3  
NEAT1  
RPS12  
RPL21  
NAT8  
ZBTB20  
CMBL  
RP1-60O19.1  
TRIP10  
FGGY  
LINC00969  
CLU  
CRYZ  
PDZK1IP1  
NOL3  
PTGR1  
TJP2  
PTMA  
RPS29  
TSPAN4  
MYO6  
LACTB2  
CKB  
FAIM  
EPHX2  
LOX  
YBX3  
SMPDL3A  
MUM1  
TCN2  
PILRB

MGRN1  
ECHDC2  
SYTL2  
GAMT  
MGLL  
RPS27  
PLEKHA1  
NDRG1  
NNMT  
RPL32  
ZNF83  
RPS4X  
PLXNB2  
FSTL3  
SERPING1  
CRLS1  
CAV2  
AKAP12  
FXD2  
SOD2  
KRT18  
C11orf1  
CNDP2  
ATP1B1  
MXI1  
PLA2G12A  
FAM195A  
CREB5  
SHMT1  
C11orf49  
HSBP1L1  
FAHD1  
RPL27A  
TMEM176A  
CARS2  
NIT2  
SSPN  
SH3BP2  
ZNF611  
WDR13  
UACA  
RPS3  
MT1E  
INTS3  
RARRES2  
SHMT2  
RPL15  
PLAGL1  
LTBR  
EVA1C  
RPL13A  
SNHG25  
ARHGAP29  
CRYAB  
RP11-553L6.5  
ERGIC1  
IGFBP4  
PFKP

RPS15A  
RPL34  
SRGN  
DST  
BDH2  
HLA-C  
RPLP2  
AIG1  
RPL28  
DHTKD1  
ADM  
CD24  
ACTB  
ALDH1A1  
RPS14  
TRIP6  
KIAA1191  
SH3YL1  
NET1  
BNIP3  
RP11-798M19.6  
ANXA4  
FAM127B  
RPL39  
SLC2A1  
HLA-B  
EPS8  
ATP6V0A1  
CLIC4  
HMGCL  
NFE2L1  
FRMD4A  
MIR4458HG  
CCND1  
BTG1  
FNDC3B  
RPS27A  
RPL12  
JADE1  
S100A13  
FAU  
RASSF7  
TMEM176B  
LARP1B  
POMGNT1  
RPL14  
WBP5  
RPL23A  
MYO9A  
PHYKPL  
RP11-1000B6.3  
RAB34  
ABHD11  
LGALS3BP  
VPS13A  
MTR  
CXCR4  
BCKDK

ANKRD37  
SMAGP  
C5orf45  
RBM41  
FGD4  
RPS25  
RPL37A  
NPEPPS  
SLC16A3  
EIF3J-AS1  
UBA52  
RNASET2  
NQO2  
RPL18A  
SPINT2  
SLC25A37  
SNHG12  
KCNQ1OT1  
GADD45A  
TPT1  
ZFP36L2  
RBM47  
RPL26  
RPSA  
STC1  
GPX3  
ARHGDIB  
BIRC3  
CYB5R3  
HCFC1R1  
CD2AP  
ISOC2  
LIMA1  
VCAM1  
RPS26  
RPS16  
PTPRC  
IRF7  
RPL30  
HPS4  
NUPR1  
TMA7  
QTRT1  
RPS15  
ASPH  
MAP3K13  
P4HA1  
C3  
BSDC1  
PIAS2  
DAB2  
UBR4  
RPLP1  
TM7SF3  
NFIA  
RUFY3  
RPL31  
RPL19

ARHGEF12  
GSS  
IFI27  
POLR2J3  
LRRK2  
CMB9-22P13.1  
S100A4  
GMFG  
CD52  
AKAP8  
KDSR  
RPS19  
MT1F  
ATP11A  
SEC31A  
HCST  
RPS6  
SPP1  
RPL29  
CFL1  
RPS18  
TGFB1  
ACADM  
ATP5E  
WDR73  
ASL  
RPS23  
VMP1  
MMP24-AS1  
POLR2J2  
CLK4  
RPL35A  
RPS28  
RPL10A  
IFI44L  
ZNF37A  
PTTG1IP  
TMEM63A  
ZSCAN18  
RPS3A  
SLC50A1  
CD151  
CD69  
RPL13  
CPEB4  
CERS2  
RNPC3  
RPL11  
ALDH3A2  
MVP  
AKR1A1  
UFSP2  
ALOX5  
ESF1  
CBWD5  
METTL15  
RPL27  
ZNF33B

RPL36AL  
AHCYL1  
MYO1C  
RPL18  
CORO1A  
YPEL2  
LGALS2  
MBNL2  
BNIP3L  
GOLGA8A  
LPP  
TFEC  
DUSP23  
ADIRF  
RGS1  
MDM2  
CYB5A  
EEF1A1  
SH3BGRL3  
NFIC  
SMYD4  
CYTIP  
ACADVL  
BACH1  
CD3D  
RPS2  
MAST4  
NDUFA4L2  
CD2  
RPL4  
PLIN2  
ARPC2  
H3F3B  
EEF1D  
CDKN1A  
PFN1  
TOR1AIP2  
MALAT1  
MAVS  
TMEM205  
PDK4  
RERE  
HMGB1  
ZNF397  
RPS10  
PDLIM5  
IGFBP3  
RPS13  
UQCRH  
RPS7  
RPS24  
DUSP2  
RPS9  
LINC00657  
UGCG  
CD53  
RPL3  
HPCAL1

C6orf89  
AC159540.1  
CHD9  
TNFSF10  
RNF114  
RPL7  
LEPROT  
AFF1  
RRBP1  
FOXJ3  
ANKLE2  
TBL1XR1  
CD37  
HIPK2  
CD3E  
SERPINA1  
ACBD3  
CCL5  
HLA-A  
CYBA  
POLR2H  
RAB11FIP1  
ABLIM1  
RPL35  
PDE4D  
PRKAG2  
HSPB1  
RPL6  
TRAC  
FYB  
FAM63B  
ZBTB16  
GOLGA2  
RPL41  
CD44  
HNRNPA1  
GOLGB1  
TTPAL  
DDAH2  
SERF2  
MYL12A  
ANKRD36  
CD48  
CST7  
SFXN1  
HLA-E  
TNFAIP3

11-Sep

GDI1  
RPS17  
PKM  
MLEC  
HMGN3  
POLR2C  
CCNL2  
PDXDC1  
RP11-347P5.1  
PPP2R5C



RPL23  
CCL4  
KIAA0907  
SREK1  
SLC25A36  
SELM  
CFDP1  
GZMA  
SAT2  
LMF2  
ELF1  
GLS  
HLA-DRB5  
CELF2  
CFAP97  
SOX4  
RPS11  
CBR4  
KLHDC2  
GPSM3  
PFDN5  
RORA  
IL2RG  
STK17B  
LCP1  
JUNB  
MKLN1  
COX4I1  
PSME1  
METTL7A  
RPL38  
SLA  
EVL  
GTF2I  
WDR11  
GATAD1  
TRIM56  
YBX1  
RPL5  
GZMK  
RNMT  
CBWD1  
RAC2  
BTF3  
TIPARP  
RPL9  
USP8  
SUMO2  
STK4  
CALM1  
LTB  
LMAN1  
LPTM5  
CARHSP1  
H3F3A  
GIMAP4  
OAZ1  
EVI2B

UQCRB  
TRBC2  
DDB2  
TUBGCP2  
PABPC1  
CD3G  
EEF1B2  
PARP14  
CDK5RAP3  
LSP1  
GOLGA8B  
RPL24  
IARS  
GIMAP7  
GOSR1  
PSMD5-AS1  
TRBC1  
PIK3IP1  
SAMSN1  
SPAG9  
ITM2A  
RPL37  
LCK  
STK17A  
RPS5  
NKG7  
NBEAL1  
RGCC  
PRDM1  
CTSA  
MT-CO2

6-Mar

CD7  
MGST3  
RPS8  
LDHA  
OST4  
EVI2A  
CHD2  
CTSD  
LONP2  
DDX17  
ARPC1B  
CTSS  
ANKRD36B  
LIMD2  
ZNF451  
ARPC3  
TTC3  
NDUFC1  
TOMM7  
SNHG9  
HSP90AA1  
RCSD1  
SUB1  
AHNAK  
VEZT  
TPI1

WSB1  
EMB  
CLEC2B  
BIN2  
SH3KBP1  
CD27  
SRP14  
RPS20  
SARAF  
DARS  
GNG11  
SLC35E3  
BORCS7  
FNBP1  
COMMD6  
IER3  
FYN  
PNRC1  
MYO1F  
PHPT1  
MYL12B  
PRKCH  
ZKSCAN1  
PRDX2  
NME3  
WIPF1  
RPL36A  
FXVD5  
IL7R  
NR4A2  
FNIP1  
SRGAP1  
RPL36  
EXOC7  
LUC7L3  
ISG20  
ATP5L  
RPS27L  
COTL1  
ITGB2  
CANX  
EZR  
GLIPR1  
LAPTM4A  
SQSTM1  
LGALS1  
CCDC14  
TRAF3IP3  
PEBP1  
SLC38A2  
NACA  
AKNA  
KIAA1551  
IFI16  
HERC4  
FUNDG2  
AFF4  
TXNIP

OCIAD2  
HM13  
CD96  
ID2  
PHF14  
EIF3E  
ETS1  
SLC25A6  
SPG7  
UBB  
RPL8  
IL10RA  
ALDOA

6-Sep

RPL22  
ANKRD44  
ARF6  
FOS  
ACTG1  
ATF6B  
SMAP2  
ACAP1  
GABPB1-AS1  
CSNK1A1  
ANKRD36C  
TNRC6A  
SYNE1  
DOCK8  
DDX24  
SRSF1  
C14orf2  
COX7A2

7-Sep

CAPZB  
FOXP1  
FAM49B  
INSR  
EIF3K  
GNLY  
UBL5  
VIMP  
MT-ND3  
RTN4  
BRK1  
CARD16  
SYTL3  
ATP1A1  
CRIP1  
CKLF  
HLA-DPB1  
MYL6  
P4HB  
GTF3A  
UQCR11  
AKAP9  
TTC19  
JUND  
EMP3

DDIT4  
RGS2  
RHOA  
DSTN  
HLA-F  
CD99  
SRSF10  
ARHGEF1  
CLEC2D  
SMCHD1  
ADGRE5  
SNRNP70  
LINC00152  
HSPA8  
FKBP5  
S100A9  
PRPF38B  
EIF3F  
UPF2  
ARPC5  
COX6B1  
TES  
ITGB1  
MYEOV2  
GNAI2  
RGS10  
KLF6  
HMGB2  
SMARCC2  
NEDD9  
HCLS1  
MSN  
DNAJB6  
CDC42  
CLIC1  
ATP1B3  
UBXN1  
HLA-DQA1  
ARL6IP5  
SH3BGR1  
NAP1L1  
N4BP2L2  
IFITM2  
PSME2  
LEPROTL1  
CCNI  
PSMB9  
TAGLN  
TPM2  
RGS5  
ACTA2  
THY1  
MGP  
CALD1  
PLAC9  
MYL9  
FRZB  
IGFBP7

BGN  
SPARC  
LGALS1  
CPE  
ADIRF  
CD36  
RGS1  
PTPRC  
NDUFA4L2  
CXCR4  
TIMP1  
SARAF  
BTG1  
MT2A  
CD74  
LAPTM5  
NEAT1  
TXNIP  
ZFP36L2  
CORO1A  
HLA-E  
RPS29  
HCST  
FYB  
SRGN  
PNISR  
SH3BGR13  
KLF6  
CCL5  
SAT1  
EVL  
SRSF7  
ID3  
STK4  
ID2  
LSP1  
HMGN1  
MT-ND1  
ZFP36  
CD44  
NDUFA4  
CD53  
TMA7  
S100A10  
CD37  
DSTN  
CELF2  
CD52  
TPM3  
S100A6  
HLA-DPA1  
TRAC  
HLA-DPB1  
CD2  
ITGB2  
MT-ND2  
AC090498.1  
S100A4

HLA-DRB1  
VAMP8  
GMFG  
HLA-F  
GZMA  
FXD5  
MALAT1  
RPL17  
RPS15A  
CYTIP  
MT-ND5  
PABPC1  
HMGB2  
TSPO  
TNFAIP3  
DAZAP2  
SNHG8  
CD69  
PRRC2C  
MCL1  
CCNL1  
CD3E  
ARGLU1  
LCP1  
HLA-DRA  
HLA-DQB1  
FAM49B  
SPCS1  
RSRP1  
DDX3X  
COTL1  
TPM1  
FOSB  
CD3D  
KMT2E  
MYL6  
EIF3F  
IL2RG  
PRPF38B  
IFI16  
DUSP2  
CD48  
RAC2  
TRBC2  
MT-ND3  
CLEC2B  
ELF1  
RNF213  
IFITM3  
HMGN2  
CCL4  
IER2  
POLR2J3  
AAK1  
KIAA1551  
DNAJB1  
FUS  
MT-ND4L

LDHA  
PRR13  
RPSA  
HERPUD1  
ARL6IP5  
LITAF  
UCP2  
ATRX  
SRRM2  
ANKRD12  
AKAP13  
SERP1  
ACAP1  
ARF6  
WIPF1  
LEPROTL1  
REL  
DDX17  
DOCK8  
IDS  
ISG20  
GPSM3  
ALOX5AP  
PIK3IP1  
TRBC1  
SLA  
MBNL1  
CTSS  
GCC2  
RNASET2  
XIST  
BTG2  
LIMD2  
RP11-347P5.1  
RSRC2  
TCF25  
CST7  
YPEL5  
STK17A  
FNBP1  
TRA2B  
SPARCL1  
AKAP9  
TSC22D3  
CCND3  
EVI2B  
ZNF90  
RGS2  
GPBP1  
ARL6IP1  
EVI2A  
SMAP2  
RPS21  
CLEC2D  
ITM2A  
CDC42SE2  
NR4A2  
EIF4B



IRF1  
LCK  
SMCHD1  
RPL28  
SERPINA1  
TAF1D  
GZMK  
PRKCH  
HSPB1  
MAP1LC3B  
NKG7  
ANXA1  
HSD17B11  
SERPINB1  
SYTL3  
DUSP1  
PPP1CA  
CNN3  
LTB  
ETS1  
PLP2  
CCNH  
DHRS7  
ADGRE5  
UFC1  
HLA-DMA  
GLRX  
PPP1R15A  
TUBA4A  
SAMSN1  
GNAI2  
GIMAP4  
MYO1F

6-Sep

PTP4A2  
CD3G  
PNN  
PCSK7  
RGS10  
SMDT1  
APOBEC3G  
EMB  
PIK3R1  
PSMA3-AS1  
IQGAP1  
BIRC3  
TYROBP  
ATM  
CD27  
AKNA  
ENSA  
CREM  
OCIAD2  
IL32  
RNF19A  
PSAP  
HLA-DRB5  
GIMAP7

MGEA5  
TMCO1  
MT-ND4  
ZNF207  
DHX36  
ORMDL1  
HLA-DQA1  
TYMP  
GPX1  
BTN3A2  
HLA-A  
FYN  
PRDM1  
DPP7  
TRAF3IP3  
IDH2  
PLIN2  
EPC1  
CD96  
IL7R  
GLUL  
CTSB  
WNK1  
IL10RA  
RAB2A  
C9orf142  
PHLDA1  
FCER1G  
CD7  
CMC1  
C10orf54  
BIN2  
ODF2L  
RPL30  
RGCC  
NPC2  
ACTB  
CUTA  
COX8A  
SOD2  
TRMT112  
LYZ  
VPS28  
APOC1  
SEC61B  
RHOA  
SEC11A  
REEP5  
ATP5J2  
APOE  
NUCKS1  
AIF1  
COX5A  
CAPZA1  
NEDD8  
NOP10  
FKBP8  
CST3

NDUFA13  
KTN1  
C14orf166  
COX6C  
ATP5G3  
ACKR1  
COL8A1  
RAMP3  
CPE  
MPZL2  
SLCO2A1  
FBLN2  
POSTN  
PTPRB  
PALMD  
NTS  
COL3A1  
TFF3  
CCL14  
ECSCR  
IL33  
HSPA2  
NR2F2  
MMRN1  
MMRN2  
PPIC  
MALL  
MEIS2  
ADAMTS18  
TPD52L1  
RSPO3  
ELN  
SELP  
NRN1  
SRPX  
CPXM2  
TLL1  
TEK  
VEGFC  
RASSF9  
GPM6A  
PTGIS  
DOC2B  
RAB3C  
MMP28  
LHX6  
THSD7A  
ITGB4  
CYR1  
PCAT19  
TM4SF1  
EPHB4  
TSPAN7  
CNTNAP3B  
BMP4  
PCDH17  
ERG  
ZNF521

CYP1B1  
FAM167B  
ADGRG6  
TMTC1  
CXorf36  
FAM171A1  
CLEC14A  
HSPG2  
PGM5  
SNCG  
CALCRL  
NUAK1  
RAMP2  
FAM107A  
MTUS1  
SYT15  
HEG1  
PLSCR4  
WWTR1  
PIR  
PROCR  
FGD5  
VWF  
LIMS2  
PLA1A  
CDC42EP5  
JAM2  
SEMA6A  
ADGRL4  
LDB2  
PALM  
PLAT  
NPDC1  
RNASE1  
SDPR  
HYAL1  
EGFL7  
HYAL2  
LRP5  
NOSTRIN  
PLCB4  
EMCN  
HSPA12B  
EMP1  
TIE1  
RHOJ  
CTGF  
FBN1  
PTRF  
MEDAG  
LRR1  
LIFR  
ZNF385D  
DNASE1L3  
EFEMP1  
SEPN1  
ROBO4  
SH3BGR1

MID1  
PODXL  
LMO2  
LMCD1  
LIMCH1  
FRY  
PLPP3  
FLNB  
PCGF2  
CADPS2  
DOCK9  
FGFR1  
CDH5  
PBX1  
EMP2  
MANSC1  
ADCY4  
IL1R1  
MIR99AHG  
TSHZ2  
PTPRG  
RP11-382A20.3  
CD109  
AQP1  
TGM2  
CD34  
RAI14  
FAM198B  
ACVRL1  
LAMA4  
ADAM15  
MARCKSL1  
FAM84B  
EPB41L4A  
ENG  
TFPI  
NFIB  
TCN2  
CRIP2  
MAP2  
MYCT1  
RUNX1T1  
CTNNAL1  
CFH  
MYO5C  
TGFB3  
ITGA6  
SASH1  
FN1  
ACKR3  
MECOM  
SLC9A3R2  
HRCT1  
SHE  
ADAMTS1  
HAPLN3  
FZD4  
IGFBP4

GAS6  
SEMA3F  
CRIM1  
C8orf4  
TMEM255B  
PLAC9  
RFK  
DIXDC1  
AHNAK2  
SOCS2  
EPAS1  
IFI27  
S100A16  
ESAM  
TINAGL1  
S1PR1  
PDLIM4  
SESN3  
CFI  
NPR1  
PTPN14  
SPTBN1  
TCF4  
RAPGEF5  
NID1  
ST6GALNAC3  
TJP1  
DLC1  
ATP8B1  
FXVD6  
LDLRAD3  
ASS1  
ITGA5  
EDN1  
BMPR2  
NFIA  
SPARCL1  
APP  
MPDZ  
PREX2  
PRSS23  
AKAP12  
HOXB7  
CNN3  
TEAD1  
CDC42BPA  
ECE1  
CLDN5  
TANC1  
TIMP3  
CEP112  
GOLM1  
APBB2  
SULF2  
FZD6  
PDLIM1  
RPS6KA2  
PTPRM

CLEC1A  
LHFP  
GNG11  
PECAM1  
EPB41L3  
TUBB6  
TSPAN9  
ACTN1  
CLU  
NCKAP1  
FSTL1  
HTRA1  
SPRY1  
ABLIM1  
LRRC32  
BCAM  
AFAP1  
CD59  
WBP5  
RPGR  
CDA  
TNS2  
EHD2  
CAV1  
COX7A1  
ITGA10  
PXDC1  
CALD1  
CD93  
ABCG2  
SH3BP5  
CRNDE  
ADIRF  
PLEKHG1  
MYOF  
IPO11  
MARCKS  
FAM213A  
RASA4  
ARHGAP29  
ELK3  
PLXNA2  
YBX3  
FERMT2  
PRCP  
SULF1  
CHSY1  
MSRB3  
COL4A1  
BACE2  
WWP1  
LAMB2  
RBMS2  
FKBP9  
CNRIP1  
SNTB2  
CAV2  
ST6GAL1

HS3ST1  
NREP  
LIMA1  
TMEM150C  
CTTN  
KIAA0355  
ARL4A  
S100A13  
NGFRAP1  
PHACTR2  
RBP1  
PMP22  
MRAS  
MET  
PKP4  
C16orf45  
LAMC1  
MDK  
INPP1  
RAPH1  
MKL2  
PDLIM3  
CYR61  
PLPP1  
PLS3  
PVRL2  
THBD  
SPARC  
TACC1  
PDLIM5  
KLF9  
CCDC50  
CDC42BPB  
AGRN  
FKBP1A  
C10orf128  
PIK3C2A  
HOXD8  
ALDH1A1  
IL6ST  
ID1  
ZFYVE21  
STAB1  
PLXND1  
ID3  
SHC1  
IFITM3  
AK1  
HHEX  
C4orf32  
NFE2L1  
GFOD2  
SYNPO  
TRIOBP  
PLVAP  
GJA1  
TNFAIP1  
PLK2



PTMS  
HES1  
COL4A2  
IGFBP7  
GALNT15  
NEDD9  
ASAP1  
TNS1  
TGFB2  
DUSP23  
CLIC2  
SSBP3  
ZBTB8A  
BGN  
MYO1C  
RFX3  
LMNA  
RALGAP2  
PTK2  
RAB13  
MGP  
PTTG1IP  
ITPR2  
TM4SF18  
BTBD3  
DAAM1  
TCEAL4  
EPHX1  
EXOC6  
ITPRIP  
PIEZO1  
SERPINB6  
GSE1  
CTNND1  
STOM  
ASRGL1  
RP11-553L6.5  
NRP2  
TSPAN3  
TPM4  
TSPAN4  
MCAM  
ACACB  
ANXA2  
MEF2C  
S100A6  
DKK3  
PPM1F  
SWAP70  
DSTN  
MLLT4  
ARHGAP31  
C1orf21  
EVA1C  
JAG1  
CD151  
TMEM47  
IRF2BP2

GNAQ  
SPTAN1  
MGST2  
SUN1  
SSFA2  
DOCK4  
NDRG1  
LRRC16A  
LEPROT  
PRKCDBP  
SLC40A1  
HSD17B12  
CCDC85B  
TMCC3  
PINK1  
TMEM30A  
SLC44A2  
ARHGEF12  
MAPK3  
GNG12  
ASPH  
AHR  
SEC14L1  
ATP11C  
GALNT1  
PARVB  
SLC38A2  
RCN1  
HDAC7  
DUSP6  
TIMP1  
ARL2  
PSMB5  
ARPC1A  
CSGALNACT1  
NOC3L  
EBPL  
MTRNR2L1  
EHD4  
WARS  
PLEC  
ABL2  
FNIP2  
ZMAT3  
CLIC4  
PXN  
COL18A1  
NCOA7  
VGLL4  
LTC4S  
IFITM2  
CD320  
FCHO2  
PERP  
RAB11A  
CHMP3  
ZEB1  
UGCG

C1orf54  
NAA10  
NFIC  
FAM43A  
GIMAP6  
TRIB2  
MKNK2  
GSN  
ATL3  
SLK  
GNAI2  
AKT3  
DPYSL2  
ATP11A  
FOXO1  
RASAL2  
UBE2H  
NFAT5  
TPST2  
TNFSF10  
KLF2  
SERPINE1  
VAT1  
ADD1  
HEBP1  
GUK1  
S100A10  
SEPW1  
TCEAL3  
TIMP2  
DNAJC10  
HSPB1  
PON2  
IFI44L  
METTL7A  
CTTNBP2NL  
DYNC1LI2  
RDX  
MAN1A1  
SELM  
DST  
VIM  
FILIP1  
AFF1  
MYL12B  
ICAM2  
BST2  
GIMAP7  
AHNAK  
IKBIP  
KLF7  
FEZ2  
YWHAE  
ENTPD1  
MT-CYB  
PEA15  
NAA38  
SRP14

CTNNA1  
C4orf48  
GINM1  
TNFRSF1A  
FRMD4B  
CTNNB1  
CDC37  
RRBP1  
VAMP3  
KLF4  
FNDC3B  
SNRK  
TMEM205  
CALU  
QKI  
NTAN1  
RHOC  
BTBD7  
NKTR  
CSRP1  
FOXP1  
MBNL2  
KTN1  
RPS27L  
NUCB2  
LINC00657  
RRM2B  
GLS  
ZKSCAN1  
FAM3C  
RPS27  
MACF1  
CHD9  
ETS2  
MED13L  
CXCR4  
MYH9  
VCAM1  
NDUFA8  
CAPNS1  
FLI1  
HERC2  
VAMP5  
CARHSP1  
ZBTB20  
MGST3  
SERINC3  
CYBA  
XAF1  
CD63  
CD55  
APLP2  
TMOD3  
TANC2  
PLSCR1  
EID1  
DYNC1I2  
MTRNR2L8

CLTA  
ITGB1  
SERINC1  
PRDX2  
HIF1A  
PIM3  
UTRN  
VPS13A  
CRTAP  
PTPRC  
FILIP1L  
GIMAP4  
LAPTM4A  
RAC1  
GBP4  
ATOX1  
IFITM1  
POLR2L  
CDC42EP3  
HSP90B1  
CCPG1  
C5orf24  
APOL1  
LPP  
ENY2  
TNRC6A  
LGALS9  
SH3GLB1  
NDUFC2  
MT-ND6  
RTN4  
MCFD2  
LIMS1  
NUCB1  
SNHG7  
ITM2B  
BRI3  
PCMTD1  
ATP1A1  
TAGLN2  
MT-ND1  
CD81  
RNF115  
IL13RA1  
RGS1  
LAP3  
SOCS3  
TRIM56  
CNIH1  
SCARB2  
PRDX1  
SEC62  
BNIP2  
SPAG9  
DYNLL1  
ACLY  
HCST  
MYL12A

TM9SF3  
JMJD1C  
FIS1  
ZFP36L2  
CORO1A  
XIST  
TPRKB  
GNG5  
ARL6IP1  
MT-ND4  
WSB1  
RBMS1  
ENPP2  
BAZ2B  
S100A4  
LAPTM5  
POLE4  
ARRDC3  
STC1  
RPL28  
BTG1  
ACTB  
CCL5  
CD69  
NEAT1  
SERBP1  
PARP14  
NUCKS1  
LRRFIP1  
RPS29  
MT-CO3  
CD37  
TRAC  
CD44  
MTRNR2L12  
FYB  
STK17B  
HLA-E  
SLA  
MT-ND4L  
GOLGB1  
CYTIP  
CD52  
LSP1  
CD2  
RPL41  
HP1BP3  
SYNGR2  
CST7  
ITGB2  
MT-ND5  
GMFG  
DUSP2  
CD3E  
GZMA  
CD53  
SAMSN1  
RP11-347P5.1

LCP1  
RAC2  
RPLP2  
GLIPR1  
H3F3B  
CD3D  
RPL27A  
RPL18A  
TXNIP  
CD48  
EVI2B  
RGS10  
STK4  
UCP2  
TRBC2  
CD3G  
ARHGDIB  
IL2RG  
IL32  
EVL  
CELF2  
SYTL3  
PRDM1  
EVI2A  
LTB  
ADGRE5  
RCSD1  
PIK3R1  
ACAP1  
CLEC2D  
IL10RA  
TRAF3IP3  
LCK  
RNASET2  
TRBC1  
BIN2  
TPSB2  
TPSAB1  
CPA3  
CTSG  
MS4A2  
HPGDS  
RGS13  
VWA5A  
SLC18A2  
GATA2  
IL1RL1  
KIT  
HDC  
RP11-354E11.2  
MLPH  
TPSD1  
GCSAML  
STXBP6  
AC004791.2  
KRT1  
NTM  
CALB2

P2RX1  
C1orf186  
FLJ21408  
MAOB  
LTC4S  
HPGD  
RAB27B  
SMYD3  
HS3ST1  
FCER1A  
SDPR  
CAPG  
BTK  
AREG  
ACOT7  
CD9  
CSF1  
LAPTM4A  
LMO4  
CLU  
EGR1  
ANKRD28  
LMNA  
STX3  
RENBP  
FER  
CD63  
ALOX5AP  
MAML1  
CD69  
ANXA1  
JUN  
ACSL4  
ALOX5  
FOXP1  
PPP1R15A  
PTGS1  
FOS  
MITF  
CTNBL1  
SLC26A2  
PLAUR  
RNF130  
GLUL  
LEO1  
H3F3B  
SAMS1  
FTH1  
BEX4  
CD82  
CXCR4  
FOSB  
IER2  
TESPA1  
ARHGAP18  
RGS2  
SRGN  
RAB32



NR4A1  
NFKBIA  
FCER1G  
TMSB10  
ASAH1  
GALC  
RHOTB3  
MAST4  
MSRA  
FAM46A  
CD33  
MT-ND4L  
RPL28  
TXNIP  
RPL37A  
RGS1  
ADRB2  
PTMA

2-Sep

RPL34  
SLC44A1  
CRBN  
ZSWIM4  
STMN1  
C4orf48  
CPM  
HLA-B  
GRAP2  
MT-ND3  
CKLF  
MT-ATP6  
TMEM154  
RPL7  
PLIN2  
TSC22D1  
CTD-3252C9.4  
ITM2C  
SEMA4A  
NFKBIZ  
IL32  
CCL5  
NDUFA4  
HLA-DPB1  
FYB  
PEBP1  
HLA-A  
CORO1A  
KCNQ1OT1  
SOCS1  
MT-ND4  
PFN1  
MT-CO2  
HLA-C  
TMSB4X  
JUNB  
CD74  
GPR65  
LYL1

FXVD5  
HLA-DPA1  
ATP6V1F  
CD3E  
PRNP  
SELK  
HINT1  
S100A6  
LAT2  
CYTIP  
LPCAT2  
CD2  
TRAC  
DUSP10  
BHLHE40  
GPX4  
FOSL2  
AHI1  
ACTB  
PLGRKT  
SPINT2  
SNX29  
SDCBP  
S100A10  
EVL  
RPS6KA5  
EMP3  
TSPAN4  
ANXA2  
STK17A  
BST2  
CFLAR  
TRBC2  
BTG2  
GZMA  
TSEN54  
DUSP1  
GADD45B  
ACTG1  
CTSD  
RPL36AL  
HCST  
MAPRE1  
ACER3  
PRDX6  
ETS1  
GIMAP4  
SYAP1  
IL18  
CD3D  
SYNE2  
TRBC1  
ISG20
