# Supplementary material for: Single-Cell and Transcriptome-Based Immune Cell-Related Prognostic Model in Clear Cell Renal Cell Carcinoma
Source: Hindawi journal article supplement (doi:10.1155/2023/5355269), 2023-03-07
Supplement: f1 [file 5355269.f1.zip]

|    | Ligand.Syr | Pair.Name | Receptor.Symbol |
|----|------------|-----------|-----------------|
| 1  | A2M        | A2M_LRP1  | LRP1            |
| 2  | ADAM10     | ADAM10_   | AXL             |
| 3  | ADAM12     | ADAM12_   | ITGB1           |
| 4  | ADAM12     | ADAM12_   | SDC4            |
| 5  | ADAM15     | ADAM15_   | ITGB1           |
| 6  | ADAM17     | ADAM17_   | ITGB1           |
| 7  | ADAM2      | ADAM2_C   | CD9             |
| 8  | ADAM2      | ADAM2_    | ITGB1           |
| 9  | ADAM28     | ADAM28_   | ITGA4           |
| 10 | ADAM9      | ADAM9_    | ITGA3           |
| 11 | ADAM9      | ADAM9_    | ITGB1           |
| 12 | ADM        | ADM_CAL   | CALCR           |
| 13 | ADM        | ADM_CAL   | CALCRL          |
| 14 | ADM        | ADM_GPR   | GPR182          |
| 15 | ADM        | ADM_MRC   | MRGPRX2         |
| 16 | ADM        | ADM_RAM   | RAMP2           |
| 17 | AHSG       | AHSG_INS  | INSR            |
| 18 | ALOX5AP    | ALOX5AP_  | ALOX5           |
| 19 | AMELX      | AMELX_LA  | LAMP1           |
| 20 | AMELY      | AMELY_LA  | LAMP1           |
| 21 | AMH        | AMH_EGF   | EGFR            |
| 22 | ANGPT1     | ANGPT1_   | ITGB1           |
| 23 | ANGPTL4    | ANGPTL4_  | TIE1            |
| 24 | ANXA1      | ANXA1_D   | DYSF            |
| 25 | ANXA1      | ANXA1_EC  | EGFR            |
| 26 | ANXA1      | ANXA1_FP  | FPR1            |
| 27 | ANXA1      | ANXA1_FP  | FPR2            |
| 28 | ANXA1      | ANXA1_FP  | FPR3            |
| 29 | APOB       | APOB_ITG  | ITGAM           |
| 30 | APOB       | APOB_ITG  | ITGB2           |
| 31 | APOB       | APOB_OLF  | OLR1            |
| 32 | APOC3      | APOC3_TL  | TLR2            |
| 33 | APOE       | APOE_CHF  | CHRNA4          |
| 34 | APOE       | APOE_LDL  | LDLR            |
| 35 | APOE       | APOE_LRP  | LRP1            |
| 36 | APOE       | APOE_LRP  | LRP2            |
| 37 | APOE       | APOE_LRP  | LRP5            |
| 38 | APOE       | APOE_LRP  | LRP8            |
| 39 | APOE       | APOE_SCA  | SCARB1          |
| 40 | APOE       | APOE_SOF  | SORL1           |
| 41 | APOE       | APOE_VLC  | VLDLR           |
| 42 | APP        | APP_CAV1  | CAV1            |
| 43 | APP        | APP_CD74  | CD74            |
| 44 | APP        | APP_FPR2  | FPR2            |
| 45 | APP        | APP_GPC1  | GPC1            |
| 46 | APP        | APP_LRP1  | LRP1            |
| 47 | APP        | APP_NCST  | NCSTN           |
| 48 | APP        | APP_NGFR  | NGFR            |
| 49 | APP        | APP_SLC4  | SLC45A3         |
| 50 | APP        | APP_TNFR  | TNFRSF21        |
| 51 | AREG       | AREG_EGF  | EGFR            |
| 52 | AREG       | AREG_ERB  | ERBB3           |
| 53 | AREGB      | AREGB_EG  | EGFR            |
| 54 | AREGB      | AREGB_ER  | ERBB3           |
| 55 | ARF1       | ARF1_CHR  | CHRM3           |
| 56 | ARF1       | ARF1_INS  | INSR            |
| 57 | ARF1       | ARF1_PLD  | PLD2            |

|     |          |                    |
|-----|----------|--------------------|
| 58  | ASIP     | ASIP_MGR MGRN1     |
| 59  | B2M      | B2M_CD1/ CD1A      |
| 60  | B2M      | B2M_CD1f CD1B      |
| 61  | B2M      | B2M_CD2/ CD247     |
| 62  | B2M      | B2M_CD3f CD3D      |
| 63  | B2M      | B2M_CD3( CD3G      |
| 64  | B2M      | B2M_HFE HFE        |
| 65  | B2M      | B2M_HLA- HLA-F     |
| 66  | B2M      | B2M_KIR2f KIR2DL1  |
| 67  | B2M      | B2M_KIR2f KIR2DL3  |
| 68  | B2M      | B2M_KIR3f KIR3DL1  |
| 69  | B2M      | B2M_KLRC KLRC1     |
| 70  | B2M      | B2M_KLRC KLRD1     |
| 71  | B2M      | B2M_LILRE LILRB1   |
| 72  | B2M      | B2M_LILRE LILRB2   |
| 73  | B2M      | B2M_TFRC TFRC      |
| 74  | BCAN     | BCAN_EGF EGFR      |
| 75  | BDNF     | BDNF_DDf DDR1      |
| 76  | BDNF     | BDNF_NGf NGFRAP1   |
| 77  | BGN      | BGN_LY96 LY96      |
| 78  | BGN      | BGN_TLR2 TLR2      |
| 79  | BGN      | BGN_TLR4 TLR4      |
| 80  | BST1     | BST1_CAV CAV1      |
| 81  | BTC      | BTC_EGFR EGFR      |
| 82  | BTC      | BTC_ERBBf ERBB3    |
| 83  | BTLA     | BTLA_CD2 CD247     |
| 84  | BTLA     | BTLA_CD7 CD79A     |
| 85  | BTLA     | BTLA_TNFf TNFRSF14 |
| 86  | BTLA     | BTLA_VTCf VTCN1    |
| 87  | C1orf200 | C1orf200_! SLC16A4 |
| 88  | C1QA     | C1QA_CDf CD93      |
| 89  | C1QA     | C1QA_CRf CR1       |
| 90  | C1QA     | C1QA_CSF CSPG4     |
| 91  | C1QB     | C1QB_LRP LRP1      |
| 92  | C3       | C3_C3AR1 C3AR1     |
| 93  | C3       | C3_C5AR2 C5AR2     |
| 94  | C3       | C3_CD19 CD19       |
| 95  | C3       | C3_CD46 CD46       |
| 96  | C3       | C3_CD81 CD81       |
| 97  | C3       | C3_CR1 CR1         |
| 98  | C3       | C3_IFITM1 IFITM1   |
| 99  | C3       | C3_ITGAM ITGAM     |
| 100 | C3       | C3_ITGAX ITGAX     |
| 101 | C3       | C3_ITGB2 ITGB2     |
| 102 | C3       | C3_LRP1 LRP1       |
| 103 | C4A      | C4A_C3AR C3AR1     |
| 104 | C4BPA    | C4BPA_CD CD40      |
| 105 | C4BPA    | C4BPA_LRf LRP1     |
| 106 | C5       | C5_C5AR1 C5AR1     |
| 107 | C6orf15  | C6orf15_D DDR1     |
| 108 | CALM1    | CALM1_Af ABCA1     |
| 109 | CALM1    | CALM1_Af ADCY8     |
| 110 | CALM1    | CALM1_Af ADCYAP1R1 |
| 111 | CALM1    | CALM1_A( AQP6      |
| 112 | CALM1    | CALM1_C/ CACNA1C   |
| 113 | CALM1    | CALM1_C/ CALCR     |
| 114 | CALM1    | CALM1_Cf CNGA2     |
| 115 | CALM1    | CALM1_Cf CRHR1     |

|     |       |                  |
|-----|-------|------------------|
| 116 | CALM1 | CALM1_EC EGFR    |
| 117 | CALM1 | CALM1_FA FAS     |
| 118 | CALM1 | CALM1_GL GLP1R   |
| 119 | CALM1 | CALM1_GL GLP2R   |
| 120 | CALM1 | CALM1_GF GP6     |
| 121 | CALM1 | CALM1_GF GRM3    |
| 122 | CALM1 | CALM1_GF GRM4    |
| 123 | CALM1 | CALM1_GF GRM5    |
| 124 | CALM1 | CALM1_GF GRM7    |
| 125 | CALM1 | CALM1_HI HMMR    |
| 126 | CALM1 | CALM1_H_ HTR2C   |
| 127 | CALM1 | CALM1_IN INSR    |
| 128 | CALM1 | CALM1_KC KCNN4   |
| 129 | CALM1 | CALM1_KC KCNQ1   |
| 130 | CALM1 | CALM1_KC KCNQ3   |
| 131 | CALM1 | CALM1_KC KCNQ5   |
| 132 | CALM1 | CALM1_M MIP      |
| 133 | CALM1 | CALM1_M MYLK     |
| 134 | CALM1 | CALM1_M MYLK2    |
| 135 | CALM1 | CALM1_OI OPRM1   |
| 136 | CALM1 | CALM1_PL PDE1A   |
| 137 | CALM1 | CALM1_PL PDE1B   |
| 138 | CALM1 | CALM1_PL PDE1C   |
| 139 | CALM1 | CALM1_PP PPAPDC2 |
| 140 | CALM1 | CALM1_PT PTH2R   |
| 141 | CALM1 | CALM1_PT PTPRA   |
| 142 | CALM1 | CALM1_SC SCN10A  |
| 143 | CALM1 | CALM1_SC SCN4A   |
| 144 | CALM1 | CALM1_SC SCTR    |
| 145 | CALM1 | CALM1_SE SELL    |
| 146 | CALM1 | CALM1_TF TRPC3   |
| 147 | CALM1 | CALM1_TF TRPC5   |
| 148 | CALM1 | CALM1_VI VIPR1   |
| 149 | CALM2 | CALM2_Af ABCA1   |
| 150 | CALM2 | CALM2_Ai ADCY8   |
| 151 | CALM2 | CALM2_Ac AQP6    |
| 152 | CALM2 | CALM2_C/ CACNA1C |
| 153 | CALM2 | CALM2_EC EGFR    |
| 154 | CALM2 | CALM2_GF GP6     |
| 155 | CALM2 | CALM2_GF GRM5    |
| 156 | CALM2 | CALM2_GF GRM7    |
| 157 | CALM2 | CALM2_IN INSR    |
| 158 | CALM2 | CALM2_KC KCNQ1   |
| 159 | CALM2 | CALM2_KC KCNQ3   |
| 160 | CALM2 | CALM2_KC KCNQ5   |
| 161 | CALM2 | CALM2_M MYLK     |
| 162 | CALM2 | CALM2_M MYLK2    |
| 163 | CALM2 | CALM2_PL PDE1A   |
| 164 | CALM2 | CALM2_PL PDE1B   |
| 165 | CALM2 | CALM2_PL PDE1C   |
| 166 | CALM2 | CALM2_PP PPAPDC2 |
| 167 | CALM2 | CALM2_SC SCN10A  |
| 168 | CALM2 | CALM2_SC SCN4A   |
| 169 | CALM2 | CALM2_SE SELL    |
| 170 | CALM2 | CALM2_TF TRPC5   |
| 171 | CALM3 | CALM3_Af ABCA1   |
| 172 | CALM3 | CALM3_Ai ADCY8   |
| 173 | CALM3 | CALM3_Ac AQP6    |

|     |        |                  |
|-----|--------|------------------|
| 174 | CALM3  | CALM3_EC EGFR    |
| 175 | CALM3  | CALM3_GF GP6     |
| 176 | CALM3  | CALM3_GF GRM5    |
| 177 | CALM3  | CALM3_GF GRM7    |
| 178 | CALM3  | CALM3_IN INSR    |
| 179 | CALM3  | CALM3_KC KCNQ1   |
| 180 | CALM3  | CALM3_KC KCNQ3   |
| 181 | CALM3  | CALM3_KC KCNQ5   |
| 182 | CALM3  | CALM3_M MYLK     |
| 183 | CALM3  | CALM3_M MYLK2    |
| 184 | CALM3  | CALM3_PL PDE1A   |
| 185 | CALM3  | CALM3_PL PDE1B   |
| 186 | CALM3  | CALM3_PL PDE1C   |
| 187 | CALM3  | CALM3_PF PPAPDC2 |
| 188 | CALM3  | CALM3_SC SCN10A  |
| 189 | CALM3  | CALM3_SC SCN4A   |
| 190 | CALM3  | CALM3_SE SELL    |
| 191 | CALM3  | CALM3_TF TRPC5   |
| 192 | CALR   | CALR_HLA HLA-F   |
| 193 | CALR   | CALR_ITG/ITGA2B  |
| 194 | CALR   | CALR_ITG/ITGA3   |
| 195 | CALR   | CALR_ITG/ITGAV   |
| 196 | CALR   | CALR_LRP LRP1    |
| 197 | CALR   | CALR_MTN MTNR1A  |
| 198 | CALR   | CALR_SCA SCARF1  |
| 199 | CALR   | CALR_TSH TSHR    |
| 200 | CAMP   | CAMP_EG EGFR     |
| 201 | CAMP   | CAMP_FPF FPR2    |
| 202 | CCL11  | CCL11_CX CXCR3   |
| 203 | CCL13  | CCL13_CX CXCR3   |
| 204 | CCL19  | CCL19_CC CCR7    |
| 205 | CCL19  | CCL19_CX CXCR3   |
| 206 | CCL20  | CCL20_CC CCR6    |
| 207 | CCL20  | CCL20_CX CXCR3   |
| 208 | CCL21  | CCL21_CC CCR7    |
| 209 | CCL21  | CCL21_CX CXCR3   |
| 210 | CCL28  | CCL28_AC ACKR2   |
| 211 | CCL28  | CCL28_CC CCR10   |
| 212 | CCL28  | CCL28_CC CCR3    |
| 213 | CCL3   | CCL3_ACK ACKR2   |
| 214 | CCL3   | CCL3_CCR CCR1    |
| 215 | CCL3   | CCL3_CCR CCR3    |
| 216 | CCL3   | CCL3_CCR CCR4    |
| 217 | CCL3   | CCL3_CCR CCR5    |
| 218 | CCL3L3 | CCL3L3_A ACKR2   |
| 219 | CCL3L3 | CCL3L3_C CCR5    |
| 220 | CCL4   | CCL4_ACK ACKR2   |
| 221 | CCL4   | CCL4_CCR CCR1    |
| 222 | CCL4   | CCL4_CCR CCR3    |
| 223 | CCL4   | CCL4_CCR CCR5    |
| 224 | CCL4   | CCL4_CCR CCR8    |
| 225 | CCL5   | CCL5_ACK ACKR2   |
| 226 | CCL5   | CCL5_ACK ACKR4   |
| 227 | CCL5   | CCL5_CCR CCR1    |
| 228 | CCL5   | CCL5_CCR CCR3    |
| 229 | CCL5   | CCL5_CCR CCR4    |
| 230 | CCL5   | CCL5_CCR CCR5    |
| 231 | CCL5   | CCL5_CXC CXCR3   |

|     |         |                  |
|-----|---------|------------------|
| 232 | CCL5    | CCL5_DAR DARC    |
| 233 | CCL5    | CCL5_GPR GPR75   |
| 234 | CCL5    | CCL5_SDC SDC1    |
| 235 | CCL5    | CCL5_SDC SDC4    |
| 236 | CCL7    | CCL7_CXC CXCR3   |
| 237 | CD14    | CD14_ITG ITGA4   |
| 238 | CD14    | CD14_ITG ITGB1   |
| 239 | CD24    | CD24_SEL SELP    |
| 240 | CD34    | CD34_SEL SELL    |
| 241 | CD40LG  | CD40LG_C CD40    |
| 242 | CD40LG  | CD40LG_IT ITGAM  |
| 243 | CD40LG  | CD40LG_IT ITGB2  |
| 244 | CD40LG  | CD40LG_T TRAF3   |
| 245 | CD55    | CD55_CD CD97     |
| 246 | CD55    | CD55_CR1 CR1     |
| 247 | CD55    | CD55_EMF EMR2    |
| 248 | CD70    | CD70_CD2 CD27    |
| 249 | CDH1    | CDH1_CD CDH2     |
| 250 | CDH1    | CDH1_EGF EGFR    |
| 251 | CDH1    | CDH1_ERB ERBB3   |
| 252 | CDH1    | CDH1_KLR KLRG1   |
| 253 | CDH1    | CDH1_PTP PTPRF   |
| 254 | CDH1    | CDH1_PTP PTPRM   |
| 255 | CEL     | CEL_CXC CXCR4    |
| 256 | CFH     | CFH_ITG ITGAM    |
| 257 | CFH     | CFH_SEL SELL     |
| 258 | CGN     | CGN_TGF TGFB1    |
| 259 | CHAD    | CHAD_ITG ITGB1   |
| 260 | CLEC11A | CLEC11A_KIT      |
| 261 | CLEC3A  | CLEC3A_C CLEC10A |
| 262 | CLEC3A  | CLEC3A_C CLEC2B  |
| 263 | COL11A1 | COL11A1_DDR1     |
| 264 | COL11A1 | COL11A1_ITGB1    |
| 265 | COL14A1 | COL14A1_CD44     |
| 266 | COL18A1 | COL18A1_ITGB1    |
| 267 | COL1A1  | COL1A1_C CD36    |
| 268 | COL1A1  | COL1A1_C CD44    |
| 269 | COL1A1  | COL1A1_C DDR1    |
| 270 | COL1A1  | COL1A1_ITGB1     |
| 271 | COL1A2  | COL1A2_C CD36    |
| 272 | COL1A2  | COL1A2_C CD44    |
| 273 | COL1A2  | COL1A2_ITGB1     |
| 274 | COL2A1  | COL2A1_C DDR1    |
| 275 | COL2A1  | COL2A1_ITGB1     |
| 276 | COL3A1  | COL3A1_C DDR1    |
| 277 | COL3A1  | COL3A1_ITGB1     |
| 278 | COL4A1  | COL4A1_C CD47    |
| 279 | COL4A1  | COL4A1_ITGB1     |
| 280 | COL4A1  | COL4A1_ITGB8     |
| 281 | COL4A3  | COL4A3_C CD47    |
| 282 | COL4A3  | COL4A3_ITGB1     |
| 283 | COL4A4  | COL4A4_C CD47    |
| 284 | COL4A4  | COL4A4_C CD93    |
| 285 | COL4A4  | COL4A4_ITGA1     |
| 286 | COL4A4  | COL4A4_ITGA2     |
| 287 | COL4A4  | COL4A4_ITGAV     |
| 288 | COL4A4  | COL4A4_ITGB1     |
| 289 | COL4A5  | COL4A5_C CD47    |

|     |          |                    |
|-----|----------|--------------------|
| 290 | COL4A5   | COL4A5_1 ITGB1     |
| 291 | COL4A6   | COL4A6_C CD47      |
| 292 | COL4A6   | COL4A6_1 ITGB1     |
| 293 | COL5A1   | COL5A1_1 ITGB1     |
| 294 | COL5A2   | COL5A2_C DDR1      |
| 295 | COL5A2   | COL5A2_1 ITGB1     |
| 296 | COL6A1   | COL6A1_1 ITGB1     |
| 297 | COL6A2   | COL6A2_1 ITGB1     |
| 298 | COL6A3   | COL6A3_1 ITGB1     |
| 299 | COL7A1   | COL7A1_1 ITGB1     |
| 300 | COL9A3   | COL9A3_N MAG       |
| 301 | CP       | CP_SLC40A1 SLC40A1 |
| 302 | CRP      | CRP_OLR1 OLR1      |
| 303 | CSF1     | CSF1_CS1 CSF1R     |
| 304 | CSF2     | CSF2_CS1 CSF1R     |
| 305 | CSF2     | CSF2_CS2 CSF2RA    |
| 306 | CSF2     | CSF2_CS3 CSF3R     |
| 307 | CSF2     | CSF2_ITGB1 ITGB1   |
| 308 | CSF3     | CSF3_CS1 CSF1R     |
| 309 | CSF3     | CSF3_CS3 CSF3R     |
| 310 | CTGF     | CTGF_ITG1 ITGAM    |
| 311 | CTGF     | CTGF_ITG2 ITGB2    |
| 312 | CTGF     | CTGF_LRP1 LRP1     |
| 313 | CTHRC1   | CTHRC1_F FZD3      |
| 314 | CTHRC1   | CTHRC1_F FZD5      |
| 315 | CTHRC1   | CTHRC1_F FZD6      |
| 316 | CUBN     | CUBN_LRP2 LRP2     |
| 317 | CXCL10   | CXCL10_C CXCR3     |
| 318 | CXCL10   | CXCL10_S1 SDC4     |
| 319 | CXCL11   | CXCL11_C CXCR3     |
| 320 | CXCL12   | CXCL12_C CD4       |
| 321 | CXCL12   | CXCL12_C CXCR3     |
| 322 | CXCL12   | CXCL12_C CXCR4     |
| 323 | CXCL12   | CXCL12_IT ITGB1    |
| 324 | CXCL12   | CXCL12_S1 SDC4     |
| 325 | CXCL13   | CXCL13_C CXCR3     |
| 326 | CXCL13   | CXCL13_C CXCR5     |
| 327 | CXCL16   | CXCL16_C CXCR6     |
| 328 | CXCL9    | CXCL9_CX CXCR3     |
| 329 | CYR61    | CYR61_CA CAV1      |
| 330 | CYR61    | CYR61_ITC ITGAM    |
| 331 | CYR61    | CYR61_ITC ITGB2    |
| 332 | DCN      | DCN_EGFR EGFR      |
| 333 | DCN      | DCN_MET MET        |
| 334 | DEFB1    | DEFB1_CC CCR6      |
| 335 | DEFB103A | DEFB103A CCR6      |
| 336 | DEFB103B | DEFB103B CCR6      |
| 337 | DEFB4A   | DEFB4A_C CCR6      |
| 338 | DEFB4A   | DEFB4A_T1 TLR4     |
| 339 | DEFB4B   | DEFB4B_C CCR6      |
| 340 | DHH      | DHH_PTC1 PTC2      |
| 341 | DUSP18   | DUSP18_C CD151     |
| 342 | DUSP18   | DUSP18_IT ITGA3    |
| 343 | DUSP18   | DUSP18_IT ITGB1    |
| 344 | DUSP18   | DUSP18_R RPSA      |
| 345 | EFEMP1   | EFEMP1_E EGFR      |
| 346 | EFNA1    | EFNA1_EP1 EPHA1    |
| 347 | EFNA1    | EFNA1_EP2 EPHA2    |

|     |       |                |          |
|-----|-------|----------------|----------|
| 348 | EFNA1 | EFNA1_EP       | EPHA3    |
| 349 | EFNA1 | EFNA1_EP       | EPHA4    |
| 350 | EFNA1 | EFNA1_EP       | EPHA5    |
| 351 | EFNA1 | EFNA1_EP       | EPHA6    |
| 352 | EFNA1 | EFNA1_EP       | EPHA7    |
| 353 | EFNA1 | EFNA1_EP       | EPHA8    |
| 354 | EFNA1 | EFNA1_EP       | EPHB1    |
| 355 | EFNA1 | EFNA1_EP       | EPHB6    |
| 356 | EGF   | EGF_CAV1       | CAV1     |
| 357 | EGF   | EGF_EGFR       | EGFR     |
| 358 | EGF   | EGF_ERBB3      | ERBB3    |
| 359 | EPGN  | EPGN_EGFR      | EGFR     |
| 360 | EREG  | EREG_EGFR      | EGFR     |
| 361 | EREG  | EREG_ERBB2     | ERBB2    |
| 362 | EREG  | EREG_ERBB3     | ERBB3    |
| 363 | EREG  | EREG_ERBB4     | ERBB4    |
| 364 | F10   | F10_ITGA       | ITGAM    |
| 365 | F10   | F10_ITGB2      | ITGB2    |
| 366 | F13A1 | F13A1_ITGA     | ITGA4    |
| 367 | F13A1 | F13A1_ITGB1    | ITGB1    |
| 368 | F2    | F2_THBD        | THBD     |
| 369 | F8    | F8_LRP1        | LRP1     |
| 370 | F9    | F9_LRP1        | LRP1     |
| 371 | FASLG | FASLG_FAS      | FAS      |
| 372 | FASLG | FASLG_TNFRSF1A | TNFRSF1A |
| 373 | FASLG | FASLG_TNFRSF6B | TNFRSF6B |
| 374 | FBLN1 | FBLN1_ITGB1    | ITGB1    |
| 375 | FBN1  | FBN1_ITGB1     | ITGB1    |
| 376 | FCN2  | FCN2_LRP1      | LRP1     |
| 377 | FGA   | FGA_ITGA       | ITGAM    |
| 378 | FGA   | FGA_ITGAX      | ITGAX    |
| 379 | FGA   | FGA_ITGB1      | ITGB1    |
| 380 | FGA   | FGA_ITGB2      | ITGB2    |
| 381 | FGA   | FGA_PLAUR      | PLAUR    |
| 382 | FGB   | FGB_ITGA       | ITGAM    |
| 383 | FGB   | FGB_ITGB1      | ITGB1    |
| 384 | FGB   | FGB_ITGB2      | ITGB2    |
| 385 | FGF1  | FGF1_CD4       | CD44     |
| 386 | FGF1  | FGF1_EGFR      | EGFR     |
| 387 | FGF13 | FGF13_EGFR     | EGFR     |
| 388 | FGF2  | FGF2_CD4       | CD44     |
| 389 | FGF2  | FGF2_SDC1      | SDC1     |
| 390 | FGF2  | FGF2_SDC4      | SDC4     |
| 391 | FGF6  | FGF6_SDC4      | SDC4     |
| 392 | FGG   | FGG_ITGB1      | ITGB1    |
| 393 | FGG   | FGG_ITGB2      | ITGB2    |
| 394 | FGL1  | FGL1_EGFR      | EGFR     |
| 395 | FIGF  | FIGF_ITGA      | ITGA4    |
| 396 | FIGF  | FIGF_ITGB1     | ITGB1    |
| 397 | FN1   | FN1_C5AR1      | C5AR1    |
| 398 | FN1   | FN1_CD44       | CD44     |
| 399 | FN1   | FN1_CD79A      | CD79A    |
| 400 | FN1   | FN1_COL13A1    | COL13A1  |
| 401 | FN1   | FN1_FLT4       | FLT4     |
| 402 | FN1   | FN1_IL17RC     | IL17RC   |
| 403 | FN1   | FN1_ITGA2      | ITGA2    |
| 404 | FN1   | FN1_ITGA2B     | ITGA2B   |
| 405 | FN1   | FN1_ITGA3      | ITGA3    |

|           |                    |
|-----------|--------------------|
| 406 FN1   | FN1_ITGA4 ITGA4    |
| 407 FN1   | FN1_ITGA5 ITGA5    |
| 408 FN1   | FN1_ITGA6 ITGA6    |
| 409 FN1   | FN1_ITGA8 ITGA8    |
| 410 FN1   | FN1_ITGA9 ITGA9    |
| 411 FN1   | FN1_ITGA\ ITGAV    |
| 412 FN1   | FN1_ITGB1 ITGB1    |
| 413 FN1   | FN1_ITGB3 ITGB3    |
| 414 FN1   | FN1_ITGB6 ITGB6    |
| 415 FN1   | FN1_ITGB7 ITGB7    |
| 416 FN1   | FN1_ITGB8 ITGB8    |
| 417 FN1   | FN1_MAG MAG        |
| 418 FN1   | FN1_NT5E NT5E      |
| 419 FN1   | FN1_PLAU PLAUR     |
| 420 FN1   | FN1_ROBC ROBO4     |
| 421 FN1   | FN1_SDC2 SDC2      |
| 422 FN1   | FN1_TMPF TMPRSS6   |
| 423 FN1   | FN1_TNFR TNFRSF11B |
| 424 FN1   | FN1_TSHR TSHR      |
| 425 GAS6  | GAS6_AXL AXL       |
| 426 GAS6  | GAS6_MEF MERTK     |
| 427 GDF9  | GDF9_OR\ ORAI2     |
| 428 GDF9  | GDF9_TGF TGFB1     |
| 429 GIP   | GIP_INSR INSR      |
| 430 GNAI2 | GNAI2_AD ADCY1     |
| 431 GNAI2 | GNAI2_AD ADCY7     |
| 432 GNAI2 | GNAI2_AD ADCY8     |
| 433 GNAI2 | GNAI2_AD ADCY9     |
| 434 GNAI2 | GNAI2_AD ADORA1    |
| 435 GNAI2 | GNAI2_AD ADRA2A    |
| 436 GNAI2 | GNAI2_AD ADRA2B    |
| 437 GNAI2 | GNAI2_AG AGTR2     |
| 438 GNAI2 | GNAI2_C5\ C5AR1    |
| 439 GNAI2 | GNAI2_CA CAV1      |
| 440 GNAI2 | GNAI2_CC CCR5      |
| 441 GNAI2 | GNAI2_CH CHRM1     |
| 442 GNAI2 | GNAI2_CN CNR1      |
| 443 GNAI2 | GNAI2_CX CXCR1     |
| 444 GNAI2 | GNAI2_CX CXCR2     |
| 445 GNAI2 | GNAI2_CX CXCR3     |
| 446 GNAI2 | GNAI2_DR DRD2      |
| 447 GNAI2 | GNAI2_ED EDNRA     |
| 448 GNAI2 | GNAI2_ED EDNRB     |
| 449 GNAI2 | GNAI2_EG EGFR      |
| 450 GNAI2 | GNAI2_F2\ F2R      |
| 451 GNAI2 | GNAI2_FPI FPR1     |
| 452 GNAI2 | GNAI2_IGF IG1R     |
| 453 GNAI2 | GNAI2_LH LHCGR     |
| 454 GNAI2 | GNAI2_LP\ LPAR3    |
| 455 GNAI2 | GNAI2_MT MTNR1A    |
| 456 GNAI2 | GNAI2_MT MTNR1B    |
| 457 GNAI2 | GNAI2_O\ OPRD1     |
| 458 GNAI2 | GNAI2_O\ OPRM1     |
| 459 GNAI2 | GNAI2_P2\ P2RY12   |
| 460 GNAI2 | GNAI2_PT\ PTPRU    |
| 461 GNAI2 | GNAI2_S1\ S1PR1    |
| 462 GNAI2 | GNAI2_S1\ S1PR3    |
| 463 GNAI2 | GNAI2_S1\ S1PR4    |



|     |       |                   |
|-----|-------|-------------------|
| 464 | GNAI2 | GNAI2_S1I S1PR5   |
| 465 | GNAI2 | GNAI2_TB TBXA2R   |
| 466 | GNAI2 | GNAI2_TSI TSHR    |
| 467 | GNAI2 | GNAI2_UN UNC5B    |
| 468 | GNAS  | GNAS_AD ADCY1     |
| 469 | GNAS  | GNAS_AD ADCY7     |
| 470 | GNAS  | GNAS_AD ADCY8     |
| 471 | GNAS  | GNAS_AD ADCY9     |
| 472 | GNAS  | GNAS_AD ADORA1    |
| 473 | GNAS  | GNAS_AD IADRB3    |
| 474 | GNAS  | GNAS_AV AVPR2     |
| 475 | GNAS  | GNAS_CR CRHR1     |
| 476 | GNAS  | GNAS_GC GCGR      |
| 477 | GNAS  | GNAS_GLF GLP1R    |
| 478 | GNAS  | GNAS_HTF HTR6     |
| 479 | GNAS  | GNAS_LHC LHCGR    |
| 480 | GNAS  | GNAS_PTC PTGDR    |
| 481 | GNAS  | GNAS_PTC PTGIR    |
| 482 | GNAS  | GNAS_TSI TSHR     |
| 483 | GNAS  | GNAS_VIP VIPR1    |
| 484 | GNB3  | GNB3_TGF TGFBR1   |
| 485 | GPC3  | GPC3_CDE CD81     |
| 486 | GSTP1 | GSTP1_TR TRAF2    |
| 487 | GZMB  | GZMB_CH CHRM3     |
| 488 | GZMB  | GZMB_IGF IGF2R    |
| 489 | GZMB  | GZMB_PG PGRMC1    |
| 490 | HAS2  | HAS2_CD4 CD44     |
| 491 | HAS2  | HAS2_HM HMMR      |
| 492 | HBEGF | HBEGF_CD CD44     |
| 493 | HBEGF | HBEGF_CD CD82     |
| 494 | HBEGF | HBEGF_CD CD9      |
| 495 | HBEGF | HBEGF_EG EGFR     |
| 496 | HBEGF | HBEGF_ER ERBB2    |
| 497 | HBEGF | HBEGF_ER ERBB4    |
| 498 | HBEGF | HBEGF_PR PRLR     |
| 499 | HDC   | HDC_HRH HRH1      |
| 500 | HDC   | HDC_HRH HRH2      |
| 501 | HDC   | HDC_HRH HRH3      |
| 502 | HDC   | HDC_HRH HRH4      |
| 503 | HEBP1 | HEBP1_FPI FPR3    |
| 504 | HGF   | HGF_CD44 CD44     |
| 505 | HGF   | HGF_MET MET       |
| 506 | HGF   | HGF_SDC1 SDC1     |
| 507 | HGF   | HGF_ST14 ST14     |
| 508 | HLA-A | HLA-A_AP APLP2    |
| 509 | HLA-A | HLA-A_CD CD3D     |
| 510 | HLA-A | HLA-A_CD CD3G     |
| 511 | HLA-A | HLA-A_ER ERBB2    |
| 512 | HLA-A | HLA-A_KIF KIR2DL1 |
| 513 | HLA-A | HLA-A_KIF KIR2DL3 |
| 514 | HLA-A | HLA-A_KIF KIR3DL1 |
| 515 | HLA-A | HLA-A_KIF KIR3DL2 |
| 516 | HLA-A | HLA-A_LIL LILRB1  |
| 517 | HLA-A | HLA-A_LIL LILRB2  |
| 518 | HLA-B | HLA-B_CA CANX     |
| 519 | HLA-B | HLA-B_CD CD3D     |
| 520 | HLA-B | HLA-B_CD CD3G     |
| 521 | HLA-B | HLA-B_KIF KIR2DL3 |

|     |          |                   |
|-----|----------|-------------------|
| 522 | HLA-B    | HLA-B_KIF KIR3DL1 |
| 523 | HLA-B    | HLA-B_KLI KLRD1   |
| 524 | HLA-B    | HLA-B_LIL LILRB1  |
| 525 | HLA-B    | HLA-B_LIL LILRB2  |
| 526 | HLA-C    | HLA-C_CE CD3D     |
| 527 | HLA-C    | HLA-C_CE CD3G     |
| 528 | HLA-C    | HLA-C_DE DDR1     |
| 529 | HLA-C    | HLA-C_KIF KIR2DL1 |
| 530 | HLA-C    | HLA-C_KIF KIR2DL3 |
| 531 | HLA-C    | HLA-C_KIF KIR2DS4 |
| 532 | HLA-C    | HLA-C_KIF KIR3DL1 |
| 533 | HLA-C    | HLA-C_LIL LILRA3  |
| 534 | HLA-C    | HLA-C_LIL LILRB1  |
| 535 | HLA-C    | HLA-C_LIL LILRB2  |
| 536 | HLA-C    | HLA-C_NC NOTCH4   |
| 537 | HLA-C    | HLA-C_SL SLC9C2   |
| 538 | HLA-E    | HLA-E_KIF KIR3DL1 |
| 539 | HLA-E    | HLA-E_KLI KLRC1   |
| 540 | HLA-E    | HLA-E_KLI KLRC2   |
| 541 | HLA-E    | HLA-E_KLI KLRD1   |
| 542 | HLA-E    | HLA-E_SL SLC16A4  |
| 543 | HLA-G    | HLA-G_CE CD4      |
| 544 | HLA-G    | HLA-G_KL KLRD1    |
| 545 | HLA-G    | HLA-G_LIL LILRB1  |
| 546 | HLA-G    | HLA-G_LIL LILRB2  |
| 547 | HMGB1    | HMGB1_SI SDC1     |
| 548 | HMGB1    | HMGB1_TI THBD     |
| 549 | HP       | HP_ASGR1 ASGR1    |
| 550 | HP       | HP_ASGR2 ASGR2    |
| 551 | HP       | HP_ITGAM ITGAM    |
| 552 | HP       | HP_ITGB2 ITGB2    |
| 553 | HRAS     | HRAS_CAV CAV1     |
| 554 | HRAS     | HRAS_INSI INSR    |
| 555 | HRAS     | HRAS_TLR TLR2     |
| 556 | HRG      | HRG_FCGF FCGR1A   |
| 557 | HSP90AA1 | HSP90AA1 CFTR     |
| 558 | HSP90AA1 | HSP90AA1 EGFR     |
| 559 | HSP90AA1 | HSP90AA1 FGFR3    |
| 560 | HSP90B1  | HSP90B1_ASGR1     |
| 561 | HSP90B1  | HSP90B1_ERBB2     |
| 562 | HSP90B1  | HSP90B1_LRP1      |
| 563 | HSP90B1  | HSP90B1_TLR1      |
| 564 | HSP90B1  | HSP90B1_TLR2      |
| 565 | HSP90B1  | HSP90B1_TLR4      |
| 566 | HSP90B1  | HSP90B1_TLR7      |
| 567 | HSP90B1  | HSP90B1_TLR9      |
| 568 | HSPA1A   | HSPA1A_G GRIN2D   |
| 569 | HSPA1A   | HSPA1A_T TLR4     |
| 570 | HSPG2    | HSPG2_ITC ITGB1   |
| 571 | HSPG2    | HSPG2_SD SDC1     |
| 572 | ICAM1    | ICAM1_CAV CAV1    |
| 573 | ICAM1    | ICAM1_EG EGFR     |
| 574 | ICAM1    | ICAM1_IL2 IL2RA   |
| 575 | ICAM1    | ICAM1_IL2 IL2RG   |
| 576 | ICAM1    | ICAM1_ITC ITGAL   |
| 577 | ICAM1    | ICAM1_ITC ITGAM   |
| 578 | ICAM1    | ICAM1_ITC ITGAX   |
| 579 | ICAM1    | ICAM1_ITC ITGB2   |

|     |        |                     |
|-----|--------|---------------------|
| 580 | ICAM2  | ICAM2_ITC ITGAL     |
| 581 | ICAM2  | ICAM2_ITC ITGAM     |
| 582 | ICAM2  | ICAM2_ITC ITGB2     |
| 583 | ICAM3  | ICAM3_CL CLEC4M     |
| 584 | ICAM3  | ICAM3_ITC ITGAD     |
| 585 | ICAM3  | ICAM3_ITC ITGAL     |
| 586 | ICAM3  | ICAM3_ITC ITGB2     |
| 587 | ICAM4  | ICAM4_ITC ITGA4     |
| 588 | ICAM4  | ICAM4_ITC ITGAL     |
| 589 | ICAM4  | ICAM4_ITC ITGAM     |
| 590 | ICAM4  | ICAM4_ITC ITGB1     |
| 591 | ICAM4  | ICAM4_ITC ITGB2     |
| 592 | ICAM5  | ICAM5_ITC ITGAL     |
| 593 | ICAM5  | ICAM5_ITC ITGB2     |
| 594 | IFNG   | IFNG_IFNG IFNGR1    |
| 595 | IFNG   | IFNG_IFNG IFNGR2    |
| 596 | IGF1   | IGF1_INSR INSR      |
| 597 | IGF2   | IGF2_INSR INSR      |
| 598 | IGFBP4 | IGFBP4_FZ FZD8      |
| 599 | IGFBP4 | IGFBP4_LR LRP6      |
| 600 | IHH    | IHH_PTCH PTCH2      |
| 601 | IL10   | IL10_IL10R IL10RA   |
| 602 | IL10   | IL10_SIRPC SIRPG    |
| 603 | IL12A  | IL12A_CD2 CD28      |
| 604 | IL12A  | IL12A_IL12 IL12RB1  |
| 605 | IL12A  | IL12A_IL12 IL12RB2  |
| 606 | IL13   | IL13_IL13R IL13RA1  |
| 607 | IL13   | IL13_IL2RG IL2RG    |
| 608 | IL15   | IL15_IL2RA IL2RA    |
| 609 | IL15   | IL15_IL2RB IL2RB    |
| 610 | IL15   | IL15_IL2RG IL2RG    |
| 611 | IL16   | IL16_CCR5 CCR5      |
| 612 | IL16   | IL16_CD4 CD4        |
| 613 | IL16   | IL16_GRIN GRIN2C    |
| 614 | IL16   | IL16_GRIN GRIN2D    |
| 615 | IL16   | IL16_KCNA KCNA3     |
| 616 | IL16   | IL16_KCNC KCND1     |
| 617 | IL16   | IL16_KCNC KCND2     |
| 618 | IL16   | IL16_KCNJ KCNJ10    |
| 619 | IL16   | IL16_KCNJ KCNJ15    |
| 620 | IL16   | IL16_KCNJ KCNJ4     |
| 621 | IL18   | IL18_CD48 CD48      |
| 622 | IL18   | IL18_IL18R IL18R1   |
| 623 | IL18   | IL18_IL18R IL18RAP  |
| 624 | IL18   | IL18_IL1RA IL1RAPL1 |
| 625 | IL18   | IL18_IL1RL IL1RL2   |
| 626 | IL1A   | IL1A_IL1R2 IL1R2    |
| 627 | IL1B   | IL1B_ADRE ADRB2     |
| 628 | IL1B   | IL1B_IL1R1 IL1R1    |
| 629 | IL1B   | IL1B_IL1R2 IL1R2    |
| 630 | IL1B   | IL1B_IL1RA IL1RAP   |
| 631 | IL1RN  | IL1RN_IL1F IL1R2    |
| 632 | IL2    | IL2_CD53 CD53       |
| 633 | IL2    | IL2_IL2RA IL2RA     |
| 634 | IL2    | IL2_IL2RB IL2RB     |
| 635 | IL2    | IL2_IL2RG IL2RG     |
| 636 | IL21   | IL21_IL2RG IL2RG    |
| 637 | IL22   | IL22_IL10R IL10RA   |

|     |          |            |         |
|-----|----------|------------|---------|
| 638 | IL34     | IL34_CSFI  | CSF1R   |
| 639 | IL4      | IL4_CD53   | CD53    |
| 640 | IL4      | IL4_IL13RA | IL13RA1 |
| 641 | IL4      | IL4_IL2RG  | IL2RG   |
| 642 | IL5      | IL5_IL5RA  | IL5RA   |
| 643 | IL6      | IL6_F3     | F3      |
| 644 | IL6      | IL6_IL6R   | IL6R    |
| 645 | IL6      | IL6_IL6ST  | IL6ST   |
| 646 | IL7      | IL7_IL2RG  | IL2RG   |
| 647 | IL7      | IL7_IL7R   | IL7R    |
| 648 | IL8      | IL8_CD79A  | CD79A   |
| 649 | IL8      | IL8_SDC1   | SDC1    |
| 650 | IL9      | IL9_IL2RG  | IL2RG   |
| 651 | INS      | INS_INSR   | INSR    |
| 652 | ITIH2    | ITIH2_FCEI | FCER1A  |
| 653 | KISS1    | KISS1_KISS | KISS1R  |
| 654 | KITLG    | KITLG_KIT  | KIT     |
| 655 | KNG1     | KNG1_ITG   | ITGAM   |
| 656 | KNG1     | KNG1_ITG   | ITGB2   |
| 657 | KNG1     | KNG1_PLA   | PLAUR   |
| 658 | L1CAM    | L1CAM_EC   | EGFR    |
| 659 | L1CAM    | L1CAM_ER   | ERBB3   |
| 660 | LACRT    | LACRT_SD   | SDC1    |
| 661 | LAMA1    | LAMA1_IT   | ITGA3   |
| 662 | LAMA1    | LAMA1_IT   | ITGB1   |
| 663 | LAMA1    | LAMA1_IT   | ITGB8   |
| 664 | LAMA1    | LAMA1_N    | NT5E    |
| 665 | LAMA1    | LAMA1_RF   | RPSA    |
| 666 | LAMA1    | LAMA1_SE   | SDC4    |
| 667 | LAMA2    | LAMA2_IT   | ITGA3   |
| 668 | LAMA2    | LAMA2_IT   | ITGB1   |
| 669 | LAMA2    | LAMA2_RF   | RPSA    |
| 670 | LAMA4    | LAMA4_IT   | ITGA3   |
| 671 | LAMA4    | LAMA4_IT   | ITGB1   |
| 672 | LAMA5    | LAMA5_IT   | ITGA3   |
| 673 | LAMA5    | LAMA5_IT   | ITGB1   |
| 674 | LAMA5    | LAMA5_SE   | SDC1    |
| 675 | LAMB1    | LAMB1_IT   | ITGA3   |
| 676 | LAMB1    | LAMB1_IT   | ITGB1   |
| 677 | LAMB2    | LAMB2_RF   | RPSA    |
| 678 | LAMB3    | LAMB3_CI   | CD151   |
| 679 | LAMB3    | LAMB3_IT   | ITGA3   |
| 680 | LAMB3    | LAMB3_IT   | ITGB1   |
| 681 | LAMC1    | LAMC1_IT   | ITGA3   |
| 682 | LAMC1    | LAMC1_IT   | ITGB1   |
| 683 | LAMC2    | LAMC2_CI   | CD151   |
| 684 | LAMC2    | LAMC2_IT   | ITGA3   |
| 685 | LAMC2    | LAMC2_IT   | ITGB1   |
| 686 | LAMC3    | LAMC3_IT   | ITGA3   |
| 687 | LAMC3    | LAMC3_IT   | ITGB1   |
| 688 | LGALS3BP | LGALS3BP   | ITGB1   |
| 689 | LGALS3BP | LGALS3BP   | VANG1   |
| 690 | LIPC     | LIPC_LRP1  | LRP1    |
| 691 | LPA      | LPA_ITG    | ITGAM   |
| 692 | LPA      | LPA_ITGB2  | ITGB2   |
| 693 | LPL      | LPL_CD44   | CD44    |
| 694 | LPL      | LPL_GPIH   | GPIHBP1 |
| 695 | LPL      | LPL_LRP1   | LRP1    |

|            |                   |
|------------|-------------------|
| 696 LPL    | LPL_LRP2 LRP2     |
| 697 LPL    | LPL_SDC1 SDC1     |
| 698 LPL    | LPL_VLDLF VLDLR   |
| 699 LRP1B  | LRP1B_PL/PLAUR    |
| 700 LRPAP1 | LRPAP1_LF LRP1    |
| 701 LRPAP1 | LRPAP1_S(SORL1    |
| 702 LTA    | LTA_LTBR LTBR     |
| 703 LTA    | LTA_TNFR:TNFRSF1B |
| 704 LTB    | LTB_CD40 CD40     |
| 705 LTB    | LTB_LTBR LTBR     |
| 706 LTB    | LTB_TNFR:TNFRSF1A |
| 707 LTF    | LTF_LRP1 LRP1     |
| 708 LY86   | LY86_CD18 CD180   |
| 709 LYZ    | LYZ_ITGAL ITGAL   |
| 710 MADCAM | MADCAM:CD44       |
| 711 MADCAM | MADCAM:ITGA4      |
| 712 MATN1  | MATN1_IT ITGB1    |
| 713 MDK    | MDK_ITGA ITGA4    |
| 714 MDK    | MDK_ITGB ITGB1    |
| 715 MDK    | MDK_LRP1 LRP1     |
| 716 MDK    | MDK_SDC SDC1      |
| 717 MDK    | MDK_SDC SDC4      |
| 718 MDK    | MDK_TSP/TSPAN1    |
| 719 MMP1   | MMP1_CD CD44      |
| 720 MMP12  | MMP12_P/PLAUR     |
| 721 MMP13  | MMP13_LF LRP1     |
| 722 MMP2   | MMP2_SD SDC2      |
| 723 MMP7   | MMP7_CD CD151     |
| 724 MMP7   | MMP7_CD CD44      |
| 725 MMP7   | MMP7_CD CDH6      |
| 726 MMP7   | MMP7_ER/ERBB4     |
| 727 MMP9   | MMP9_CD CD44      |
| 728 MMP9   | MMP9_ITC ITGAM    |
| 729 MMP9   | MMP9_ITC ITGB2    |
| 730 MMP9   | MMP9_LRI LRP1     |
| 731 MST1   | MST1_MS MST1R     |
| 732 MUC7   | MUC7_SEL SELL     |
| 733 NAMPT  | NAMPT_IN INSR     |
| 734 NCAM1  | NCAM1_P PTPRA     |
| 735 NCAN   | NCAN_CD CDH2      |
| 736 NGF    | NGF_NGFR NGFRAP1  |
| 737 NID1   | NID1_ITGA ITGA3   |
| 738 NID1   | NID1_ITGE ITGB1   |
| 739 NID1   | NID1_PTP PTPRF    |
| 740 NPNT   | NPNT_ITG ITGB1    |
| 741 NRG1   | NRG1_ERB/ERBB3    |
| 742 NRG2   | NRG2_ERB/ERBB3    |
| 743 NRG4   | NRG4_EGF EGFR     |
| 744 NTF4   | NTF4_NGFR NGFRAP1 |
| 745 NUCB2  | NUCB2_ER ERAP1    |
| 746 OMG    | OMG_TNF TNFRSF1B  |
| 747 P4HB   | P4HB_GPR GPR162   |
| 748 PDGFB  | PDGFB_LR LRP1     |
| 749 PF4    | PF4_CXCR CXCR3    |
| 750 PF4    | PF4_THBD THBD     |
| 751 PIP    | PIP_CD4 CD4       |
| 752 PKM    | PKM_CD4 CD44      |
| 753 PLAT   | PLAT_ITGA ITGAM   |

|     |         |                   |
|-----|---------|-------------------|
| 754 | PLAT    | PLAT_ITGEITGB2    |
| 755 | PLAT    | PLAT_LRP1LRP1     |
| 756 | PLAU    | PLAU_ITG/ITGA3    |
| 757 | PLAU    | PLAU_ITG/ITGAM    |
| 758 | PLAU    | PLAU_ITGEITGB1    |
| 759 | PLAU    | PLAU_ITGEITGB2    |
| 760 | PLAU    | PLAU_LRP:LRP1     |
| 761 | PLAU    | PLAU_PLA PLAUR    |
| 762 | PLAU    | PLAU_ST1:ST14     |
| 763 | PLG     | PLG_ITGAMITGAM    |
| 764 | PLG     | PLG_ITGB1ITGB1    |
| 765 | PLG     | PLG_ITGB2ITGB2    |
| 766 | PLG     | PLG_PLAU PLAUR    |
| 767 | PLG     | PLG_PLGR PLGRKT   |
| 768 | PLTP    | PLTP_ABC,ABCA1    |
| 769 | PNOC    | PNOC_OP OPRL1     |
| 770 | PODXL   | PODXL_SE SELL     |
| 771 | PODXL2  | PODXL2_S SELL     |
| 772 | PRND    | PRND_RPSRPSA      |
| 773 | PROC    | PROC_ITG.ITGAM    |
| 774 | PROC    | PROC_ITG ITGB2    |
| 775 | PROC    | PROC_THE THBD     |
| 776 | PROS1   | PROS1_AX AXL      |
| 777 | PROS1   | PROS1_TY TYRO3    |
| 778 | PSAP    | PSAP_CD1CD1B      |
| 779 | PSAP    | PSAP_CEL:CELSR1   |
| 780 | PSAP    | PSAP_GPR GPR37    |
| 781 | PSAP    | PSAP_GPR GPR37L1  |
| 782 | PSAP    | PSAP_LRP:LRP1     |
| 783 | PSAP    | PSAP_SORSORT1     |
| 784 | PSEN1   | PSEN1_CD CD44     |
| 785 | PTGS2   | PTGS2_AL:ALOX5    |
| 786 | PTGS2   | PTGS2_CA CAV1     |
| 787 | PTMA    | PTMA_VIP VIPR1    |
| 788 | PTN     | PTN_PLXNPLXNB2    |
| 789 | PTN     | PTN_SDC1SDC1      |
| 790 | RARRES2 | RARRES2:CCRL2     |
| 791 | RARRES2 | RARRES2:CMKLR1    |
| 792 | RARRES2 | RARRES2:GPR1      |
| 793 | RELN    | RELN_ITG/ITGA3    |
| 794 | RELN    | RELN_ITGEITGB1    |
| 795 | REN     | REN_ATP6 ATP6AP2  |
| 796 | RIMS1   | RIMS1_SLC SLC18A2 |
| 797 | RNASE2  | RNASE2_T TLR2     |
| 798 | RPS19   | RPS19_C5: C5AR1   |
| 799 | RSPO3   | RSPO3_SD SDC4     |
| 800 | RTN4    | RTN4_CNTCNTNAP1   |
| 801 | RTN4    | RTN4_GJB:GJB2     |
| 802 | RTN4    | RTN4_LIN(LINGO1   |
| 803 | RTN4    | RTN4_NGF NGFR     |
| 804 | RTN4    | RTN4_RTN RTN4R    |
| 805 | RTN4    | RTN4_RTN RTN4RL1  |
| 806 | RTN4    | RTN4_TNF TNFRSF19 |
| 807 | S100A8  | S100A8_TI TLR4    |
| 808 | S100A9  | S100A9_TI TLR4    |
| 809 | SAA1    | SAA1_FPR: FPR1    |
| 810 | SAA1    | SAA1_FPR: FPR2    |
| 811 | SAA1    | SAA1_SCA SCARB1   |

|     |          |             |        |
|-----|----------|-------------|--------|
| 812 | SELPLG   | SELPLG_ES   | ESAM   |
| 813 | SELPLG   | SELPLG_IT   | ITGAM  |
| 814 | SELPLG   | SELPLG_IT   | ITGB2  |
| 815 | SELPLG   | SELPLG_SE   | SELE   |
| 816 | SELPLG   | SELPLG_SE   | SELL   |
| 817 | SELPLG   | SELPLG_SE   | SELP   |
| 818 | SEMA4A   | SEMA4A_F    | PLXND1 |
| 819 | SEMA4B   | SEMA4B_C    | DCBLD2 |
| 820 | SEMA4C   | SEMA4C_F    | PLXNB2 |
| 821 | SEMA4D   | SEMA4D_M    | MET    |
| 822 | SEMA4D   | SEMA4D_F    | PLXNB2 |
| 823 | SEMA4G   | SEMA4G_F    | PLXNB2 |
| 824 | SEMA5A   | SEMA5A_M    | MET    |
| 825 | SEMA6D   | SEMA6D_T    | TREM2  |
| 826 | SEMA6D   | SEMA6D_T    | TYROBP |
| 827 | SEMA7A   | SEMA7A_I    | ITGB1  |
| 828 | SEMA7A   | SEMA7A_F    | PLXNC1 |
| 829 | SERPINA1 | SERPINA1_L  | LRP1   |
| 830 | SERPINC1 | SERPINC1_L  | LRP1   |
| 831 | SERPINE1 | SERPINE1_L  | LRP1   |
| 832 | SERPINE1 | SERPINE1_P  | LAUR   |
| 833 | SERPINE2 | SERPINE2_L  | LRP1   |
| 834 | SERPING1 | SERPING1_L  | LRP1   |
| 835 | SERPING1 | SERPING1_SE | LE     |
| 836 | SERPING1 | SERPING1_SE | LP     |
| 837 | SFTPA1   | SFTPA1_TL   | TLR2   |
| 838 | SFTPD    | SFTPD_LY    | LY96   |
| 839 | SFTPD    | SFTPD_TL    | TLR4   |
| 840 | SHBG     | SHBG_CL     | CLDN4  |
| 841 | SHH      | SHH_PT      | PTCH2  |
| 842 | SLIT1    | SLIT1_SDC   | SDC1   |
| 843 | SLIT2    | SLIT2_SDC   | SDC1   |
| 844 | SLPI     | SLPI_CD4    | CD4    |
| 845 | SORBS1   | SORBS1_I    | INSR   |
| 846 | SPINK1   | SPINK1_E    | EGFR   |
| 847 | SPINT1   | SPINT1_ST   | ST14   |
| 848 | SPON2    | SPON2_IT    | ITGAM  |
| 849 | SPON2    | SPON2_IT    | ITGB2  |
| 850 | SPP1     | SPP1_CD4    | CD44   |
| 851 | SPP1     | SPP1_ITGA   | ITGA4  |
| 852 | SPP1     | SPP1_ITGA   | ITGA5  |
| 853 | SPP1     | SPP1_ITGA   | ITGA9  |
| 854 | SPP1     | SPP1_ITGA   | ITGAV  |
| 855 | SPP1     | SPP1_ITGB   | ITGB1  |
| 856 | SPP1     | SPP1_S1P    | S1PR1  |
| 857 | SYTL3    | SYTL3_N     | NRXN1  |
| 858 | TCN2     | TCN2_CN     | CNR1   |
| 859 | TCN2     | TCN2_LRP    | LRP2   |
| 860 | TFPI     | TFPI_F3     | F3     |
| 861 | TFPI     | TFPI_LRP1   | LRP1   |
| 862 | TFPI     | TFPI_SDC4   | SDC4   |
| 863 | TFPI     | TFPI_VLDL   | VLDLR  |
| 864 | TG       | TG_ASGR1    | ASGR1  |
| 865 | TGFA     | TGFA_EGF    | EGFR   |
| 866 | TGFA     | TGFA_ERB    | ERBB3  |
| 867 | TGFB1    | TGFB1_CA    | CAV1   |
| 868 | TGFB1    | TGFB1_CX    | CXCR4  |
| 869 | TGFB1    | TGFB1_IT    | ITGB8  |

|     |          |            |           |
|-----|----------|------------|-----------|
| 870 | TGFB1    | TGFB1_TG   | TGFBR1    |
| 871 | TGFB2    | TGFB2_TG   | TGFBR1    |
| 872 | TGFB3    | TGFB3_TG   | TGFBR1    |
| 873 | TGM2     | TGM2_GPI   | GPR56     |
| 874 | TGM2     | TGM2_ITG   | ITGA4     |
| 875 | TGM2     | TGM2_ITG   | ITGA9     |
| 876 | TGM2     | TGM2_ITG   | ITGB1     |
| 877 | TGM2     | TGM2_ITG   | ITGB3     |
| 878 | TGM2     | TGM2_SD    | SDC4      |
| 879 | TGM2     | TGM2_TB    | TBXA2R    |
| 880 | THBS1    | THBS1_CD   | CD36      |
| 881 | THBS1    | THBS1_CD   | CD47      |
| 882 | THBS1    | THBS1_ITC  | ITGA2B    |
| 883 | THBS1    | THBS1_ITC  | ITGA3     |
| 884 | THBS1    | THBS1_ITC  | ITGA4     |
| 885 | THBS1    | THBS1_ITC  | ITGA6     |
| 886 | THBS1    | THBS1_ITC  | ITGB1     |
| 887 | THBS1    | THBS1_ITC  | ITGB3     |
| 888 | THBS1    | THBS1_LRI  | LRP1      |
| 889 | THBS1    | THBS1_LRI  | LRP5      |
| 890 | THBS1    | THBS1_SC   | SCARB1    |
| 891 | THBS1    | THBS1_SD   | SDC1      |
| 892 | THBS1    | THBS1_SD   | SDC4      |
| 893 | THBS1    | THBS1_TN   | TNFRSF11B |
| 894 | THBS2    | THBS2_CD   | CD47      |
| 895 | THBS2    | THBS2_ITC  | ITGA4     |
| 896 | THBS2    | THBS2_ITC  | ITGB1     |
| 897 | TIMP1    | TIMP1_CD   | CD63      |
| 898 | TIMP2    | TIMP2_ITC  | ITGA3     |
| 899 | TIMP2    | TIMP2_ITC  | ITGB1     |
| 900 | TNC      | TNC_EGFR   | EGFR      |
| 901 | TNC      | TNC_ITGB   | ITGB1     |
| 902 | TNC      | TNC_NT5E   | NT5E      |
| 903 | TNC      | TNC_SDC1   | SDC1      |
| 904 | TNC      | TNC_SDC4   | SDC4      |
| 905 | TNF      | TNF_LTBR   | LTBR      |
| 906 | TNF      | TNF_TNFR   | TNFRSF1B  |
| 907 | TNFSF10  | TNFSF10_1  | TNFRSF10A |
| 908 | TNFSF10  | TNFSF10_1  | TNFRSF10B |
| 909 | TNFSF10  | TNFSF10_1  | TNFRSF10C |
| 910 | TNFSF10  | TNFSF10_1  | TNFRSF10D |
| 911 | TNFSF10  | TNFSF10_1  | TNFRSF11B |
| 912 | TNFSF11  | TNFSF11_1  | TNFRSF11B |
| 913 | TNFSF12  | TNFSF12_1  | TNFRSF12A |
| 914 | TNFSF12  | TNFSF12_1  | TNFRSF25  |
| 915 | TNFSF13  | TNFSF13_1  | TNFRSF11B |
| 916 | TNFSF13  | TNFSF13_1  | TNFRSF13B |
| 917 | TNFSF13  | TNFSF13_1  | TNFRSF17  |
| 918 | TNFSF13B | TNFSF13B_1 | TNFRSF13B |
| 919 | TNFSF13B | TNFSF13B_1 | TNFRSF13C |
| 920 | TNFSF13B | TNFSF13B_1 | TNFRSF17  |
| 921 | TNFSF14  | TNFSF14_1  | LTBR      |
| 922 | TNFSF18  | TNFSF18_1  | TNFRSF18  |
| 923 | TNFSF4   | TNFSF4_T1  | TNFRSF4   |
| 924 | TNFSF9   | TNFSF9_T1  | TNFRSF9   |
| 925 | TSLP     | TSLP_IL7R  | IL7R      |
| 926 | UBA52    | UBA52_AC   | ACVR1     |
| 927 | UBA52    | UBA52_AC   | AGTR1     |



|     |       |                    |
|-----|-------|--------------------|
| 928 | UBA52 | UBA52_BN BMPR1B    |
| 929 | UBA52 | UBA52_EG EGFR      |
| 930 | UBA52 | UBA52_ER ERBB2     |
| 931 | UBA52 | UBA52_FSIFSHR      |
| 932 | UBA52 | UBA52_NC NOTCH1    |
| 933 | UBA52 | UBA52_TG TGFB1     |
| 934 | UBA52 | UBA52_TG TGFB2     |
| 935 | VASP  | VASP_CXC CXCR2     |
| 936 | VCAM1 | VCAM1_IT ITGA4     |
| 937 | VCAM1 | VCAM1_IT ITGA9     |
| 938 | VCAM1 | VCAM1_IT ITGAD     |
| 939 | VCAM1 | VCAM1_IT ITGB1     |
| 940 | VCAM1 | VCAM1_IT ITGB2     |
| 941 | VCAM1 | VCAM1_IT ITGB7     |
| 942 | VCAN  | VCAN_CD CD44       |
| 943 | VCAN  | VCAN_EGF EGFR      |
| 944 | VCAN  | VCAN_ITG ITGA4     |
| 945 | VCAN  | VCAN_ITG ITGB1     |
| 946 | VCAN  | VCAN_SEL SELL      |
| 947 | VCAN  | VCAN_SEL SELP      |
| 948 | VCAN  | VCAN_TLR TLR1      |
| 949 | VCAN  | VCAN_TLR TLR2      |
| 950 | VEGFA | VEGFA_EG EGFR      |
| 951 | VEGFA | VEGFA_EP EPHB2     |
| 952 | VEGFA | VEGFA_FL FLT1      |
| 953 | VEGFA | VEGFA_GP GPC1      |
| 954 | VEGFA | VEGFA_ITC ITGA9    |
| 955 | VEGFA | VEGFA_ITC ITGAV    |
| 956 | VEGFA | VEGFA_ITC ITGB1    |
| 957 | VEGFA | VEGFA_KD KDR       |
| 958 | VEGFA | VEGFA_NF NRP1      |
| 959 | VEGFA | VEGFA_NF NRP2      |
| 960 | VEGFA | VEGFA_RE RET       |
| 961 | VEGFA | VEGFA_SIF SIRPA    |
| 962 | VEGFA | VEGFA_TY TYRO3     |
| 963 | VEGFC | VEGFC_ITC ITGB1    |
| 964 | VIM   | VIM_CD44 CD44      |
| 965 | VTN   | VTN_CD47 CD47      |
| 966 | VTN   | VTN_ITGA ITGA3     |
| 967 | VTN   | VTN_ITGB ITGB1     |
| 968 | VTN   | VTN_ITGB ITGB8     |
| 969 | VTN   | VTN_PLAU PLAUR     |
| 970 | VTN   | VTN_TNFR TNFRSF11B |
| 971 | VWF   | VWF_TNFR TNFRSF11B |
| 972 | WNT3A | WNT3A_A ATP6AP2    |
| 973 | WNT3A | WNT3A_LF LRP1      |
| 974 | XCL1  | XCL1_XCR XCR1      |
| 975 | XCL2  | XCL2_XCR XCR1      |
| 976 | ZG16B | ZG16B_CX CXCR4     |
| 977 | ZG16B | ZG16B_TL1 TLR2     |
| 978 | ZG16B | ZG16B_TL1 TLR4     |
| 979 | ZG16B | ZG16B_TL1 TLR5     |
| 980 | ZP3   | ZP3_EGFR EGFR      |
| 981 | ZP3   | ZP3_MERT MERTK     |
