# Supplementary material for: Single-Cell and Transcriptome-Based Immune Cell-Related Prognostic Model in Clear Cell Renal Cell Carcinoma
Source: J Oncol. 2023 Mar 7;2023:5355269. doi: 10.1155/2023/5355269 (PMC10014191; doi:10.1155/2023/5355269)
Supplement: Supplementary Materials — Supplementary Table 1: Notes on cell clustering. Supplementary Table 2: Differential genes in each cell cluster. Supplementary Table 3: Ligand-receptor relationship pair. Supplementary Table 4: Immune cell multifactor network relationship pair. Supplementary Table 5: Intersection genes in immune cell multifactor network relationship pair and TCGA. Supplementary Table 6: Genes in black and magenta models of WGCNA. [file 5355269.f1.zip]

Archive with 6 entries (6 files):
- Supplementary Table 1. Notes on cell clustering.pdf
- Supplementary Table 2. Differential genes in each cell cluster.pdf
- Supplementary Table 3. Ligand-receptor relationship pair.pdf
- Supplementary Table 4. Immune cell multifactor network relationship pair.pdf
- Supplementary Table 5.pdf
- Supplementary Table 6. Genes in black and magenta models of WGCNA.pdf
